# Supplementary material for: Comparative transcriptomics of primary cells in vertebrates
Source: Genome Res. 2020 Jul;30(7):951–61. doi: 10.1101/gr.255679.119 (PMC7397866; doi:10.1101/gr.255679.119)
Supplement: Supplemental Material [file supp_gr.255679.119_Supplemental_Table_S2.xlsx]

## Sheet: README
Sheets TableS2a-TableS2x contain the differential gene expression results for human compared to mouse, rat, dog, or chicken in each primary cell type in FANTOM5, with the CAGE gene expression level in tags-per-million, the log2 fold-change, and the −log10 Benjamini-Hochberg corrected p-value, multiplied by the sign of the log2 fold-change.

## Sheet: TableS2a
Differential gene expression analysis, mouse vs human, Astrocyte - cerebellum
gene	tpm, human, Astrocyte - cerebellum	tpm, mouse, Astrocyte - cerebellum	log2(foldchange)	-log10(pvalue)*sign
A1BG	28.1027	0	7.84567	5.00231
A2M	2.36354	34.7849	-3.83432	-1.36008
A4GALT	13.1401	105.757	-3.07767	-1.24399
AAAS	131.298	167.912	-0.396927	-0.216949
AACS	37.0168	118.811	-1.69206	-4.6673
AADAT	10.2355	1.73481	2.45289	1.33133
AAED1	28.3689	29.5984	-0.0610165	-0.0219125
AAGAB	25.1515	45.8831	-0.881224	-0.401782
AAK1	29.9819	33.3318	-0.160045	-0.0737652
AAMDC	39.9797	106.465	-1.42185	-2.55721
AAMP	199.629	521.916	-1.39656	-3.50552
AAR2	48.1708	71.1547	-0.577053	-0.542107
AARD	2.11924	113.706	-5.72655	-14.1037
AARS	173.291	93.0658	0.922521	0.669115
AARS2	56.8253	18.2293	1.61851	2.86024
AARSD1	63.4706	78.0015	-0.310134	-0.294767
AASDHPPT	28.2549	24.4587	0.176909	0.070108
AASS	12.0132	6.64431	0.812309	0.205839
ABAT	9.09866	103.849	-3.52495	-9.75949
ABCA1	15.2377	128.486	-3.09074	-6.03391
ABCA2	9.08883	36.7223	-1.99672	-1.24544
ABCA3	18.9895	108.816	-2.4566	-1.26901
ABCA7	14.1396	22.0933	-0.646657	-0.339378
ABCB10	13.1645	15.4178	-0.260083	-0.10786
ABCB6	17.302	15.8567	0.0985898	0.033254
ABCB8	47.1863	51.4376	-0.141352	-0.0958586
ABCB9	23.6762	24.7812	-0.057404	-0.0248331
ABCC1	58.9211	63.67	-0.0939782	-0.0348432
ABCC10	23.917	18.9905	0.351836	0.160635
ABCC4	17.8571	4.07986	1.99124	1.27768
ABCC5	14.03	53.7933	-1.95643	-2.60287
ABCD1	27.7051	38.8515	-0.500027	-0.335406
ABCD3	10.1221	44.9647	-2.15343	-3.08031
ABCD4	45.9489	20.1595	1.16582	1.4539
ABCE1	22.5427	38.6837	-0.791003	-0.822194
ABCF1	113.58	108.59	0.0571188	0.03651
ABCF2	83.162	37.0892	1.14487	1.15803
ABCF3	68.9537	28.7376	1.25033	2.38878
ABCG4	1.17148	13.5152	-3.60205	-2.97958
ABHD10	17.7253	22.5285	-0.370821	-0.173086
ABHD11	30.1553	98.9907	-1.7238	-3.76779
ABHD12	107.387	206.023	-0.983024	-0.632678
ABHD13	15.7617	17.2761	-0.154303	-0.070734
ABHD14A	28.6277	79.5445	-1.48192	-2.07861
ABHD14B	121.679	121.192	-0.0348745	-0.0102692
ABHD16A	35.7681	91.8019	-1.38339	-1.21147
ABHD17A	36.1806	238.192	-2.74803	-6.92229
ABHD17B	16.7099	39.5301	-1.24729	-0.763739
ABHD17C	37.7269	112.609	-1.58565	-2.75269
ABHD18	10.0312	0	6.34703	3.14344
ABHD2	56.857	156.339	-1.46677	-2.70258
ABHD3	11.312	0	6.52169	3.38259
ABHD4	106.44	307.196	-1.51218	-1.41557
ABHD5	9.9535	32.6292	-1.72448	-1.5711
ABHD6	14.9198	14.9995	-0.0179104	-0.0044094
ABHD8	23.1954	122.057	-2.39948	-4.67475
ABI1	53.2691	53.3714	-0.017544	-0.00951154
ABI2	135.402	31.7169	2.06342	5.76083
ABI3BP	2.52303	13.6902	-2.51132	-0.54767
ABL1	54.4556	97.215	-0.843085	-0.984931
ABL2	23.9112	5.57128	2.04663	2.55829
ABLIM1	15.7676	25.8267	-0.717986	-0.237021
ABLIM2	0.244734	15.5724	-6.24522	-2.39999
ABLIM3	14.9194	0.757703	4.58185	2.52778
ABR	72.1543	25.0006	1.53592	1.95994
ABRACL	78.0619	118.585	-0.636472	-0.475818
ABT1	34.2952	26.1936	0.357392	0.225239
ABTB1	18.2359	24.0475	-0.395772	-0.216225
ABTB2	25.2742	12.1437	1.00451	0.773847
AC004381.6	9.87057	10.5563	-0.116478	-0.0401055
AC013461.1	17.1301	16.8133	0.0228461	0.00806398
AC025263.3	0	44.3197	-9.49094	-8.12968
AC068533.7	0.489467	17.7869	-5.35144	-3.80455
ACAA2	54.2777	79.071	-0.55016	-0.468763
ACAD11	5.52508	17.667	-1.67805	-1.19144
ACAD8	28.6947	16.7858	0.729172	0.506863
ACAD9	60.6746	12.1916	2.24498	3.01902
ACADL	0.599219	71.271	-6.77359	-9.29709
ACADM	12.8336	28.8167	-1.19758	-0.646813
ACADS	11.1943	73.3558	-2.72237	-4.15634
ACADSB	4.22341	40.1031	-3.27366	-6.8972
ACADVL	146.301	86.0031	0.791007	0.516309
ACAP2	20.6055	41.5742	-1.03225	-0.738481
ACAP3	16.3562	37.6142	-1.20984	-0.871663
ACAT1	24.4124	178.356	-2.86199	-4.21716
ACBD3	34.1588	19.8442	0.776606	0.540948
ACBD4	11.0918	54.4	-2.31464	-3.35942
ACBD6	0.173837	91.6126	-9.59929	-11.5541
ACBD7	12.3048	0	6.60404	2.65342
ACD	44.3799	100.496	-1.20099	-1.53133
ACE	3.2262	70.0061	-4.43581	-11.7068
ACER3	9.63192	19.7207	-1.04157	-0.936241
ACIN1	210.119	117.041	0.834582	1.05862
ACKR3	97.1445	77.3097	0.298671	0.117558
ACLY	197.028	78.4812	1.31887	1.70218
ACO1	41.2345	76.5989	-0.905118	-0.649178
ACO2	118.408	72.2961	0.732861	0.451503
ACOT11	4.39725	74.8258	-4.05009	-3.33038
ACOT13	36.827	53.0933	-0.539559	-0.314387
ACOT7	122.239	55.1817	1.13768	1.36119
ACOT8	48.7716	41.4507	0.234423	0.115499
ACOX1	40.7858	182.963	-2.13172	-2.01878
ACOX2	11.8626	0	6.57749	3.2055
ACOX3	30.2868	32.2072	-0.104291	-0.0603405
ACP1	93.914	1.31998	6.59821	8.73988
ACP2	96.8915	74.3125	0.378168	0.339655
ACP5	0.070897	33.5343	-8.19264	-6.33332
ACP6	25.4702	22.1856	0.169159	0.0634279
ACSBG1	1.655	339.381	-7.64776	-7.84227
ACSF2	42.3097	67.8636	-0.687249	-0.624842
ACSF3	19.9849	23.4097	-0.23315	-0.0970623
ACSL1	10.4183	20.7937	-1.02635	-0.753068
ACSL3	79.3536	101.489	-0.345863	-0.14969
ACSL4	32.4884	16.9093	0.916605	0.668892
ACSS1	24.4776	25.967	-0.0243892	-0.00441452
ACSS2	29.7685	100.625	-1.70888	-0.924098
ACSS3	16.8073	10.8033	0.659954	0.279268
ACTA2	427.491	4693.61	-3.33161	-1.33997
ACTB	21237.5	16760.3	0.323346	0.374905
ACTG1	32838	15.4934	11.0425	145.808
ACTG2	161.588	2.63997	6.08335	4.21107
ACTL6A	39.3438	56.7583	-0.547464	-0.246368
ACTN1	1150.34	363.804	1.70686	1.44011
ACTN4	630.073	277.997	1.18514	0.908605
ACTR10	69.1014	83.4146	-0.275347	-0.147727
ACTR1A	368.146	247.022	0.5629	0.751922
ACTR1B	64.6095	120.007	-0.893869	-0.881939
ACTR2	29.4983	19.3538	0.595181	0.498885
ACTR3	122.234	139.539	-0.192217	-0.100383
ACTR3B	14.6672	9.69911	0.533482	0.207303
ACTR5	13.43	14.4923	-0.0927509	-0.0378594
ACTR8	22.5312	27.0472	-0.289335	-0.102387
ACVR1	40.475	32.7527	0.305718	0.0949708
ACVR1B	19.476	35.7799	-0.88391	-0.635153
ACVR2A	11.9238	8.08777	0.513331	0.214736
ACVRL1	3.03121	15.0341	-2.36784	-0.615221
ACY3	0	10.9747	-7.51866	-3.55328
ACYP1	25.1092	181.597	-2.87611	-6.0985
ACYP2	26.0555	60.4917	-1.19532	-0.738956
ADA	15.139	23.0668	-0.629941	-0.362913
ADAM10	19.0654	25.4394	-0.436249	-0.194845
ADAM12	177.774	192.357	-0.146416	-0.0564595
ADAM15	110.914	334.316	-1.64351	-1.12927
ADAM17	15.9644	17.6945	-0.148652	-0.0542967
ADAM19	135.576	30.9219	2.08682	1.50053
ADAM22	8.57163	43.5763	-2.36506	-2.87775
ADAM23	7.5904	15.1469	-1.01569	-0.422942
ADAM8	0.579073	15.377	-4.75636	-1.54397
ADAM9	97.9758	51.4615	0.904857	1.00122
ADAMTS1	25.4348	99.878	-1.94856	-1.64704
ADAMTS10	32.6359	49.0864	-0.641926	-0.195331
ADAMTS12	34.0945	7.13822	2.2595	0.980551
ADAMTS14	19.8195	12.3187	0.71564	0.328595
ADAMTS15	56.4544	51.1161	0.0633674	0.0133775
ADAMTS16	43.7845	0.195421	7.23494	2.60154
ADAMTS2	15.585	337.605	-4.50625	-3.21001
ADAMTS5	0.611116	67.3085	-6.91295	-8.44535
ADAMTS7	16.5261	14.8076	0.138655	0.049776
ADAMTS9	5.91683	30.2362	-2.38519	-1.79741
ADAMTSL1	135.358	28.5697	2.25249	4.77499
ADAMTSL3	1.28775	34.6926	-4.78806	-2.17493
ADAMTSL4	8.27327	176.069	-4.4616	-4.74528
ADAMTSL5	0.971549	33.5139	-5.15635	-3.62388
ADAR	105.911	37.9535	1.47307	2.37791
ADARB1	12.418	9.70268	0.392797	0.161752
ADAT1	20.3783	3.07877	2.6372	2.65242
ADAT2	12.1263	16.1995	-0.439399	-0.183868
ADAT3	137.498	163.618	-0.271338	-0.211409
ADCK1	11.981	28.3468	-1.26072	-1.26037
ADCK3	17.5567	8.35871	1.12273	0.642434
ADCK4	25.8037	32.9374	-0.357898	-0.172509
ADCK5	10.7247	14.7357	-0.461997	-0.248937
ADCY3	30.4451	33.3149	-0.144915	-0.0513778
ADCY5	0.978935	21.7815	-4.58774	-1.80029
ADCY6	21.8791	0	7.48383	4.52704
ADCY9	14.1806	5.20442	1.37386	0.885837
ADCYAP1	32.2385	0.195421	6.76661	3.07692
ADCYAP1R1	1.13901	10.2854	-3.21925	-1.38873
ADD1	175.642	174.581	0.0120418	0.00687875
ADD2	33.1553	0	8.06351	3.91556
ADD3	15.8407	54.3005	-1.78964	-2.40359
ADGRA1	0.070897	19.2987	-7.34185	-3.36733
ADGRA2	14.8727	399.851	-4.81275	-2.90669
ADGRA3	20.7318	19.6452	0.0410645	0.0172172
ADGRB1	0.10932	22.2816	-7.52482	-4.83208
ADGRB2	11.6284	22.8989	-0.987121	-0.658292
ADGRB3	5.64758	17.9308	-1.63176	-0.475452
ADGRE5	8.25922	43.2503	-2.40505	-4.3986
ADGRG1	42.0538	101.163	-1.22706	-0.505703
ADGRL1	6.13648	79.7986	-3.74764	-5.77261
ADGRL2	1.42303	68.879	-5.60538	-8.73988
ADH5	42.2162	70.3658	-0.75868	-0.322745
ADHFE1	3.05788	29.1213	-3.24976	-2.83574
ADI1	150.074	45.4275	1.7089	2.66024
ADIPOR1	81.2687	255.544	-1.67221	-2.49333
ADIPOR2	47.4798	166.445	-1.77814	-1.32852
ADK	23.581	12.0957	0.92804	0.564312
ADM	201.325	311.013	-0.71899	-0.220349
ADM2	10.5463	0.562282	4.73452	1.042
ADNP	76.7839	64.8808	0.23357	0.188865
ADNP2	10.0514	13.0488	-0.397575	-0.194343
ADO	35.3942	68.8336	-0.967403	-1.14741
ADORA1	18.3075	76.7045	-2.00125	-0.71686
ADORA2B	49.038	41.5093	0.180493	0.0395169
ADPGK	40.5059	81.2216	-1.03359	-0.672062
ADPRH	8.85335	188.434	-4.43772	-13.9751
ADPRHL2	45.9014	56.7762	-0.315745	-0.13964
ADRA1B	17.0762	57.3252	-1.81483	-0.747407
ADRA1D	7.01118	19.6896	-1.45191	-0.457992
ADRA2A	5.77547	346.804	-5.9219	-0.950657
ADRB1	1.00402	17.7353	-4.1053	-2.19404
ADRB2	18.4529	25.9573	-0.498402	-0.22416
ADSL	30.2639	40.1679	-0.420654	-0.231969
ADSS	41.5534	53.6867	-0.388374	-0.245842
AEBP1	234.163	1663.1	-2.89172	-1.31865
AEBP2	24.6129	29.0289	-0.263089	-0.161748
AEN	49.6442	54.3138	-0.12117	-0.0447314
AES	445.103	648.378	-0.558491	-0.365319
AFAP1	125.393	213.007	-0.800799	-0.448478
AFAP1L2	27.069	44.6795	-0.70518	-0.183659
AFF1	31.6005	73.5211	-1.25331	-0.994898
AFF3	11.5041	20.0911	-0.800391	-0.406721
AFF4	63.1973	35.9717	0.809251	1.04887
AFG3L2	70.8747	36.7019	0.92628	1.27147
AFMID	86.2977	6.54839	3.62447	8.62287
AGA	8.26094	37.1239	-2.17017	-2.79602
AGAP2	0	10.7313	-7.50385	-2.92142
AGAP3	72.7306	88.8492	-0.292436	-0.221631
AGBL3	4.24936	33.2394	-2.96479	-3.33327
AGBL5	53.1125	17.2557	1.65292	1.49454
AGFG1	37.2974	31.8404	0.209876	0.142187
AGFG2	13.6565	59.6488	-2.13126	-1.86022
AGGF1	19.6572	19.3778	-0.000459812	-0.00021266
AGO1	45.6807	31.398	0.510686	0.377191
AGO2	26.1014	25.9537	0.0147785	0.00584182
AGO3	18.573	7.96787	1.28637	0.777235
AGPAT1	89.313	206.156	-1.23397	-1.38403
AGPAT2	19.7293	28.5769	-0.569839	-0.152511
AGPAT3	31.7136	279.298	-3.13868	-10.1184
AGPAT4	50.3736	104.367	-1.06856	-1.09357
AGPAT5	35.3125	50.1451	-0.526	-0.368996
AGPS	49.2951	26.317	0.871399	0.626433
AGRN	136.92	253.898	-0.899397	-0.857326
AGT	15.8162	125.78	-3.03982	-0.545122
AGTPBP1	4.68721	10.7277	-1.209	-0.789086
AGTRAP	47.7734	151.122	-1.68709	-1.62256
AHCYL1	64.8262	118.735	-0.884639	-1.61427
AHCYL2	9.50984	28.8611	-1.61032	-2.12495
AHDC1	47.1377	70.85	-0.600158	-0.510973
AHI1	9.07966	13.1447	-0.567825	-0.214625
AHNAK	375.392	751.811	-1.00777	-0.806622
AHNAK2	90.3053	9.43531	3.32869	3.86416
AHRR	13.3444	0.586263	4.13665	1.9666
AHSA1	123.162	127.519	-0.0582049	-0.0231061
AHSA2	14.9682	13.4157	0.142214	0.0642976
AIF1L	121.176	54.6219	1.18831	0.41325
AIFM1	22.5241	8.52658	1.31941	0.79465
AIFM2	17.6796	19.0589	-0.137224	-0.0570012
AIG1	72.8946	51.1462	0.498391	0.490801
AIMP1	26.6788	30.2734	-0.209181	-0.0860951
AIMP2	60.935	57.0604	0.0881954	0.055771
AIP	64.2784	60.4101	0.0953289	0.0401055
AJUBA	122.98	25.2164	2.29964	2.67387
AK1	173.62	393.985	-1.19189	-2.61526
AK2	64.4019	115.224	-0.840978	-0.565812
AK3	61.6154	452.177	-2.867	-5.39091
AK4	10.5656	3.07877	1.76157	0.64924
AK5	12.5522	14.4407	-0.239154	-0.0642895
AKAP1	26.7722	14.2453	0.864643	0.642263
AKAP10	18.9868	21.2876	-0.15346	-0.0633149
AKAP12	53.4113	30.5239	0.793921	0.553532
AKAP13	20.9545	10.2889	1.06714	0.85568
AKAP2	73.6908	48.0026	0.594733	0.336169
AKAP7	6.96652	18.1813	-1.38792	-1.338
AKAP8	34.7611	15.274	1.20167	1.40556
AKAP8L	82.5838	22.0417	1.89378	3.63336
AKAP9	15.6546	8.92099	0.857615	0.384915
AKIP1	64.1016	33.3318	0.932352	1.34066
AKIRIN1	106.54	28.0722	1.90606	2.18142
AKIRIN2	140.908	127.822	0.12024	0.062832
AKR1A1	161.879	580.311	-1.83118	-4.23739
AKR1B1	168.965	19.988	3.04989	9.66532
AKR1E2	3.55459	14.4647	-2.03538	-1.5053
AKR7A2	237.239	181.851	0.369868	0.300258
AKT1	120.224	346.364	-1.5405	-3.40727
AKT1S1	89.6383	212.701	-1.26858	-1.63163
AKT2	139.718	194.197	-0.501819	-0.423481
AKT3	10.6433	4.64214	1.08897	0.548624
AKTIP	2.98103	31.5863	-3.37802	-2.00184
ALAD	32.1158	124.976	-1.97134	-4.52482
ALAS1	75.4661	117.131	-0.646859	-0.855413
ALCAM	103.228	85.998	0.203042	0.053713
ALDH16A1	40.0397	34.8268	0.197836	0.0931844
ALDH18A1	84.2787	22.5765	1.85966	3.02552
ALDH1A2	1.06854	30.5586	-4.91422	-2.12242
ALDH1A3	97.9034	0.195421	8.28854	6.90868
ALDH1B1	62.8115	19.5253	1.6904	2.2579
ALDH1L1	10.9337	275.746	-4.58098	-3.05863
ALDH3A2	12.2158	30.9316	-1.35445	-0.965059
ALDH3B1	35.331	46.2331	-0.395742	-0.240552
ALDH4A1	72.6433	149.085	-1.06015	-0.933206
ALDH5A1	10.5672	24.0679	-1.19792	-0.645124
ALDH6A1	41.6176	63.4781	-0.608867	-0.412996
ALDH7A1	53.7543	118.433	-1.16016	-0.935964
ALDH9A1	85.4209	50.8584	0.746034	0.773849
ALDOC	32.1374	854.632	-4.6448	-3.72249
ALG12	40.2678	30.8189	0.393441	0.236189
ALG14	27.7161	106.146	-1.95182	-2.77117
ALG2	54.3381	46.0617	0.225149	0.137471
ALG3	97.5246	88.4007	0.127516	0.0597103
ALG5	17.027	26.8038	-0.675791	-0.43418
ALG8	34.1117	14.6841	1.16294	0.723042
ALKBH1	6.46487	18.7676	-1.56289	-1.25522
ALKBH2	41.235	9.67869	2.16849	2.67061
ALKBH4	28.9011	13.4912	1.13393	0.761405
ALKBH5	153.156	58.3732	1.3935	1.85855
ALKBH6	13.3833	44.7249	-1.75044	-2.18089
ALKBH7	195.091	77.5663	1.34334	1.23453
ALPK2	40.1367	0	8.34609	5.87651
ALPL	43.9261	23.7561	0.884177	0.385456
ALS2	16.3563	8.23523	0.974822	0.605224
ALX4	0.070897	70.2852	-9.93642	-1.22526
AMACR	12.4043	24.5139	-1.00204	-0.543642
AMBRA1	82.2052	57.2078	0.519025	0.554422
AMFR	62.1131	121.512	-0.957162	-0.924609
AMIGO1	5.87884	11.7013	-0.998636	-0.284144
AMIGO2	16.2533	6.01009	1.35546	0.650516
AMIGO3	53.5196	2.46853	4.65356	8.61884
AMMECR1	10.5934	12.6855	-0.252222	-0.0757838
AMMECR1L	0.141794	66.0977	-8.39004	-10.2193
AMN1	9.63235	26.8278	-1.49682	-1.34188
AMOT	29.7847	71.4052	-1.27344	-2.42499
AMOTL1	67.6201	34.189	0.967856	0.902711
AMOTL2	213.196	647.005	-1.61231	-2.34837
AMPD2	53.5901	38.975	0.442945	0.384125
AMPD3	5.91655	83.4085	-3.82611	-4.82742
AMPH	18.5547	7.03516	1.35207	0.448478
AMT	9.48432	54.6255	-2.50008	-1.81591
AMZ2	51.3381	57.5471	-0.186209	-0.102669
ANAPC1	9.92784	20.6019	-1.04473	-0.867802
ANAPC10	28.7587	19.3982	0.545471	0.218045
ANAPC11	277.419	690.896	-1.33929	-1.53586
ANAPC13	28.4157	93.6867	-1.73352	-3.23295
ANAPC15	52.9628	25.2644	1.03393	1.03553
ANAPC16	91.2157	107.37	-0.248799	-0.209267
ANAPC2	39.1425	77.7786	-1.00256	-1.55063
ANAPC4	7.07613	24.195	-1.77935	-1.26725
ANAPC5	139.596	114.25	0.278415	0.140537
ANAPC7	30.2802	35.8411	-0.252707	-0.0969592
ANG	23.5668	17.8695	0.366623	0.0944113
ANGEL1	12.5983	2.85937	2.21889	1.73891
ANGEL2	21.6249	16.8373	0.346788	0.167086
ANGPT2	5.01052	22.9301	-2.25628	-0.920765
ANGPT4	0	36.7391	-9.17208	-1.06865
ANGPTL2	25.4647	80.3369	-1.68389	-2.05705
ANGPTL4	4.57646	209.241	-5.59746	-3.4249
ANK1	15.0276	1.12456	3.99735	1.31962
ANK2	5.23626	61.5862	-3.59158	-3.51898
ANKFY1	35.7713	17.1527	1.01437	0.743763
ANKH	14.8072	25.045	-0.783778	-0.578814
ANKIB1	11.3238	19.2783	-0.788167	-0.431167
ANKLE2	45.3784	16.1036	1.47538	1.73678
ANKMY1	14.6	0	6.89372	3.84278
ANKMY2	5.73604	11.8043	-1.01904	-0.582814
ANKRA2	19.1161	50.0732	-1.3963	-2.31036
ANKRD10	89.7832	28.8815	1.61274	2.54487
ANKRD11	95.2913	47.5256	0.989885	1.25534
ANKRD12	10.366	7.96787	0.42968	0.155999
ANKRD13A	40.389	81.4028	-1.02184	-1.65432
ANKRD13B	26.2285	31.1342	-0.249006	-0.133017
ANKRD13C	31.9937	42.0502	-0.413121	-0.237306
ANKRD13D	19.0203	13.8305	0.447919	0.200663
ANKRD16	12.5718	14.8076	-0.265093	-0.116153
ANKRD17	29.2259	27.4212	0.0931331	0.0413992
ANKRD24	0.070897	31.3332	-8.08541	-6.50953
ANKRD27	15.3898	12.3391	0.271138	0.109211
ANKRD28	11.1711	5.39984	0.968795	0.514357
ANKRD33B	17.8175	1.51541	3.82747	3.21234
ANKRD39	21.4512	19.7962	0.134265	0.059909
ANKRD40	44.6301	131.962	-1.5501	-1.76757
ANKRD42	12.1268	8.03981	0.591092	0.260324
ANKRD46	6.65262	50.0385	-2.90333	-3.22567
ANKRD52	78.1181	55.895	0.468937	0.294767
ANKRD54	54.3705	35.461	0.622401	0.541138
ANKRD9	14.2218	31.1306	-1.12378	-0.603059
ANKS1A	7.63026	25.9946	-1.77386	-1.1564
ANKS3	11.1292	12.9014	-0.23956	-0.085406
ANKS6	13.1628	2.68793	2.25062	1.62252
ANKZF1	42.4619	10.5563	1.97507	3.28888
ANLN	34.6048	17.396	0.950488	0.411661
ANO10	37.7013	68.9571	-0.884082	-1.04671
ANO6	37.3693	65.0522	-0.81137	-1.00113
ANO8	24.0795	28.1789	-0.224886	-0.101064
ANP32B	383.033	75.3376	2.33004	11.6866
ANP32E	65.5454	66.5018	-0.0422083	-0.0105719
ANPEP	343.322	119.619	1.42926	0.349658
ANTXR1	45.2133	54.7811	-0.324875	-0.0917067
ANTXR2	19.0001	19.3059	-0.0272252	-0.010701
ANXA1	38.4545	79.2781	-1.12786	-0.363183
ANXA11	709.756	148.203	2.2524	4.40975
ANXA2	199.635	661.555	-1.76946	-2.1085
ANXA3	9.6857	99.1585	-3.3556	-5.95967
ANXA4	33.5639	18.2053	0.853216	0.456998
ANXA5	1036.63	369.151	1.48028	2.16253
ANXA6	799.701	228.522	1.80632	6.0985
ANXA7	42.7644	87.6119	-1.05188	-1.38496
AOX1	3.13458	16.0077	-2.36115	-0.945593
AP000275.65	60.4699	110.63	-0.869037	-0.60234
AP002884.2	23.4149	162.157	-2.81364	-4.42887
AP1AR	10.4815	15.0546	-0.531349	-0.195148
AP1B1	263.228	152.187	0.776739	1.33987
AP1G1	67.0596	43.1064	0.621673	0.555273
AP1G2	11.885	6.35297	0.851129	0.406192
AP1M1	163.744	137.77	0.241461	0.173906
AP1S1	81.1312	130.543	-0.690906	-0.720612
AP1S2	29.3761	33.6675	-0.211902	-0.0816768
AP1S3	12.7157	1.71083	3.013	1.62174
AP2A1	230.839	230.532	-0.00820997	-0.00443024
AP2A2	186.389	158.195	0.222994	0.152002
AP2B1	93.9673	69.3683	0.425135	0.288064
AP2M1	876.181	38.7005	4.48744	12.9961
AP2S1	428.25	398.053	0.0809422	0.0343207
AP3B1	23.5035	18.5242	0.339993	0.175047
AP3B2	2.42167	17.9547	-2.86592	-0.935964
AP3D1	211.882	109.064	0.956397	1.2855
AP3M1	18.7413	15.9322	0.204887	0.0759863
AP3M2	9.69673	26.5568	-1.46023	-0.84008
AP3S1	41.7374	24.7297	0.739186	0.811008
AP3S2	77.3135	70.1847	0.128565	0.0755817
AP4M1	41.4612	23.3617	0.823552	0.7669
AP4S1	2.73544	13.5835	-2.33349	-1.17734
AP5B1	11.5414	12.7575	-0.129402	-0.0414905
AP5S1	39.4579	40.1031	-0.027935	-0.0125124
AP5Z1	32.003	41.4507	-0.377022	-0.204514
APAF1	11.9436	15.5929	-0.374911	-0.15312
APBA2	36.698	2.90733	3.46339	4.77499
APBA3	19.5617	93.5092	-2.27875	-3.30408
APBB1	75.7489	3.05479	4.70262	10.0033
APBB1IP	0.251114	15.9873	-5.88145	-2.93479
APBB2	58.7826	84.4203	-0.543363	-0.293849
APBB3	10.5394	116.246	-3.46456	-14.7241
APC	9.23988	26.2451	-1.51248	-1.79431
APC2	5.51869	21.2121	-1.93926	-0.630561
APCDD1	32.7208	4.00792	3.0905	4.6527
APEH	132.498	118.142	0.170423	0.101736
APEX1	604.093	93.6041	2.679	5.85839
APEX2	55.7606	24.2429	1.19835	1.42968
APH1A	160.51	107.994	0.572984	0.349904
API5	50.5325	47.2653	0.0656376	0.0267516
APIP	29.1567	47.8996	-0.751322	-0.405338
APITD1	22.0057	5.61925	1.84481	1.5711
APLN	10.0838	26.3339	-1.33113	-0.374875
APLP1	23.8278	35.2691	-0.585659	-0.204631
APLP2	309.608	197.961	0.631658	0.910382
APMAP	140.535	21.2325	2.68664	5.98588
APOBEC1	0	15.9286	-8.01082	-4.03825
APOBEC3H	0	52.0238	-9.74321	-10.5099
APOD	2.054	4123.41	-11.0004	-2.24985
APOE	107.893	5913.34	-5.7812	-11.9946
APOL6	20.4021	0	7.36767	4.17547
APOM	14.1114	0	6.85691	3.46218
APOPT1	85.6096	99.3575	-0.221521	-0.163426
APP	473.664	509.738	-0.112944	-0.0687948
APPBP2	24.7332	31.8643	-0.385764	-0.247625
APPL1	20.1181	15.7883	0.368266	0.171558
APPL2	19.1438	64.9048	-1.76827	-2.85033
APRT	264.769	473.941	-0.847871	-0.990117
APTX	26.9538	5.59526	2.1655	2.36139
AQP4	0.489467	23.1352	-5.68529	-3.53315
AQR	10.82	15.7607	-0.571083	-0.213482
ARAF	94.4881	124.791	-0.417946	-0.276301
ARAP1	79.2337	145.912	-0.941666	-0.379899
ARAP3	27.7343	0	7.79593	4.68747
ARCN1	109.901	52.8019	1.03357	1.03931
AREL1	42.6442	19.3263	1.10056	0.895871
ARF1	748.902	472.109	0.659462	1.25101
ARF3	271.793	281.568	-0.0614405	-0.0487295
ARF4	618.501	554.893	0.142906	0.112776
ARF5	302.402	381.003	-0.338867	-0.204708
ARF6	110.376	164.715	-0.594916	-0.516309
ARFGAP1	92.9197	49.7783	0.896644	1.25251
ARFGAP2	48.8415	27.414	0.806136	0.632213
ARFGAP3	26.5961	39.8082	-0.599934	-0.419303
ARFGEF1	14.4219	16.2271	-0.160033	-0.0699956
ARFGEF2	15.2056	41.7936	-1.46962	-1.43147
ARFIP2	100.485	87.1455	0.19862	0.163426
ARFRP1	47.9217	21.38	1.14109	1.02652
ARGLU1	134.163	64.6818	1.02884	1.22046
ARHGAP1	211.759	80.066	1.37849	1.8803
ARHGAP10	24.2131	15.178	0.702095	0.392117
ARHGAP12	10.882	14.1458	-0.415001	-0.14809
ARHGAP17	64.3523	29.0325	1.15229	1.80443
ARHGAP18	10.9354	9.01692	0.264278	0.0828131
ARHGAP21	26.0861	34.7717	-0.43244	-0.307023
ARHGAP22	29.4957	23.6975	0.318344	0.0830202
ARHGAP26	5.14565	11.362	-1.17365	-0.509136
ARHGAP29	58.6701	18.915	1.62948	2.39482
ARHGAP31	82.3733	139.327	-0.780938	-0.643134
ARHGAP33	15.9903	7.62142	1.02706	0.269218
ARHGAP35	2.04748	49.9773	-4.6995	-9.44589
ARHGAP39	10.0563	20.7422	-1.03662	-0.418799
ARHGAP4	238.594	141.415	0.764856	0.608893
ARHGAP42	9.52131	22.2647	-1.22475	-0.965182
ARHGAP44	3.56097	15.7607	-2.13932	-1.77843
ARHGDIA	619.928	913.724	-0.584598	-0.465117
ARHGDIB	9.96555	95.6119	-3.36583	-1.20275
ARHGEF1	58.2549	81.1186	-0.497433	-0.289511
ARHGEF10	14.6348	47.0556	-1.68362	-1.44858
ARHGEF10L	10.5972	13.1208	-0.349696	-0.140961
ARHGEF11	26.0331	31.35	-0.281999	-0.151229
ARHGEF12	2.02138	43.3738	-4.49826	-9.58222
ARHGEF17	35.5516	33.1124	0.102298	0.04346
ARHGEF19	5.18162	12.8258	-1.31975	-0.529146
ARHGEF2	122.622	77.0928	0.663665	0.720612
ARHGEF25	44.977	75.3243	-0.754031	-0.538736
ARHGEF26	9.48361	20.4233	-1.10973	-0.43799
ARHGEF39	12.0542	9.11284	0.348258	0.099802
ARHGEF40	73.6054	81.2181	-0.165209	-0.0736392
ARHGEF6	10.0516	5.15646	0.975582	0.406721
ARHGEF7	29.6158	41.6869	-0.512679	-0.456896
ARHGEF9	16.3789	4.83756	1.6662	0.861065
ARID1A	68.9057	78.6154	-0.195986	-0.142403
ARID1B	41.5878	69.5265	-0.747768	-0.796743
ARID4B	12.9798	12.7575	0.0528178	0.01933
ARID5A	20.9345	21.7468	-0.0515356	-0.0157684
ARID5B	70.8595	92.7204	-0.401326	-0.357287
ARIH1	36.8883	30.8872	0.235842	0.15312
ARIH2	61.4207	26.9033	1.15966	1.77083
ARL1	68.9041	66.3339	0.049934	0.0189984
ARL10	14.2746	64.4384	-2.17945	-4.68747
ARL14EP	10.0196	23.6771	-1.25593	-0.796395
ARL15	10.5947	16.4225	-0.643957	-0.29192
ARL16	71.3385	35.1385	1.00665	0.84008
ARL2BP	102.385	200.675	-0.968052	-1.0585
ARL3	81.0547	140.787	-0.804685	-0.657534
ARL4A	4.41869	27.9284	-2.66664	-2.26986
ARL4C	97.1792	123.417	-0.303297	-0.0868212
ARL4D	162.611	12.3187	3.77206	4.58391
ARL5A	35.6654	27.884	0.357617	0.24364
ARL5B	17.5532	13.5631	0.376811	0.196728
ARL6	4.93195	38.824	-2.98912	-4.21112
ARL6IP1	99.073	292.472	-1.56627	-1.07856
ARL6IP4	358.354	103.349	1.78937	4.09292
ARL6IP5	49.949	227.124	-2.23186	-2.6215
ARL6IP6	99.8224	75.2861	0.386664	0.319165
ARL8A	113.876	669.948	-2.53075	-4.49099
ARL8B	30.8909	70.476	-1.20001	-2.16459
ARMC1	30.1633	31.6414	-0.0962017	-0.0352525
ARMC10	49.1811	5.009	3.18646	6.68505
ARMC2	11.274	32.3679	-1.49811	-0.576409
ARMC5	19.555	21.7024	-0.141425	-0.0529442
ARMC6	64.9653	34.2609	0.919332	1.14197
ARMC7	24.3547	12.857	0.954231	0.476828
ARMC8	15.2028	16.371	-0.143598	-0.0583638
ARMC9	22.7577	20.5707	0.130941	0.0406292
ARMCX1	24.539	10.4364	1.26321	0.816139
ARMCX2	94.5449	77.7306	0.264865	0.192786
ARMCX3	36.5932	10.8033	1.82105	1.76431
ARMCX5	16.5871	14.0019	0.221552	0.10108
ARMCX6	55.1603	6.69585	3.04888	7.0351
ARMT1	10.5886	19.2783	-0.890932	-0.394745
ARNT	34.8186	50.6355	-0.545841	-0.544976
ARNT2	48.5995	70.4378	-0.514257	-0.2503
ARNTL	8.72489	24.6302	-1.52101	-1.53824
ARNTL2	12.3894	0.562282	5.13542	2.19585
ARPC1A	283.641	165.551	0.767136	1.20112
ARPC1B	186.344	279.986	-0.617604	-0.375467
ARPC2	287.997	148.468	0.929104	0.927831
ARPC3	341.816	499.366	-0.578705	-0.490875
ARPC4	340.038	339.943	-0.0192985	-0.010701
ARPC5L	58.1462	46.5005	0.304067	0.221094
ARPP19	78.6415	137.324	-0.816351	-0.909846
ARRB1	4.35926	16.2546	-1.91029	-1.0889
ARRB2	52.2438	20.1355	1.35587	2.03904
ARRDC1	16.8133	24.0031	-0.519326	-0.174559
ARRDC2	3.19824	52.507	-4.01698	-4.97337
ARRDC3	48.7117	58.9666	-0.290244	-0.217971
ARRDC4	19.8977	21.7744	-0.126572	-0.0352525
ARSA	39.145	123.419	-1.66467	-1.56328
ARSB	36.8875	50.1007	-0.445669	-0.312057
ARSI	13.4662	41.7589	-1.63743	-1.40691
ARSJ	31.0629	5.3279	2.63876	3.6601
ARTN	14.5008	1.36795	3.17285	1.5769
ARVCF	6.82343	312.713	-5.48435	-10.2891
ARX	0	154.383	-24.5609	-6.52783
ASAH1	35.765	64.3629	-0.862588	-1.11994
ASAP1	49.3051	63.2934	-0.368921	-0.228539
ASAP2	36.2939	16.2475	1.13531	0.58526
ASAP3	67.268	42.0716	0.637561	0.157301
ASB1	35.1418	19.9641	0.800058	0.669663
ASB13	9.96554	23.4816	-1.26208	-1.0227
ASB6	33.3399	43.4253	-0.386422	-0.284144
ASB7	7.11297	11.338	-0.703831	-0.344884
ASB8	39.116	70.0781	-0.860271	-0.642884
ASCC1	17.2378	34.0379	-1.00013	-0.88737
ASCC2	88.73	51.1942	0.778518	0.895605
ASCC3	25.347	12.9529	1.00188	0.841174
ASCL1	1.15277	134.597	-6.80137	-1.76658
ASF1A	25.6081	34.8436	-0.467166	-0.28844
ASF1B	118.724	26.1216	2.15043	3.01614
ASH2L	24.3704	41.2241	-0.771828	-0.790057
ASIC1	18.2998	1.36795	3.50311	1.95629
ASIP	0	184.597	-11.5746	-16.6811
ASNA1	103.913	197.789	-0.929018	-1.21267
ASNS	109.868	30.9832	1.8624	0.980044
ASPG	0	79.3537	-10.4296	-1.70789
ASPM	11.8795	7.37803	0.618239	0.201432
ASPSCR1	23.5947	110.247	-2.24233	-3.53705
ASRGL1	11.2688	85.2826	-2.8785	-1.95026
ASTN1	4.68213	40.7231	-3.09565	-1.83485
ASTN2	11.8631	24.6542	-1.06901	-0.749224
ASUN	10.689	14.979	-0.510548	-0.273787
ASXL1	136.711	63.7731	1.09242	1.42363
ASXL2	16.045	8.01583	1.02966	0.75375
ATAD1	20.2515	23.8005	-0.254926	-0.135481
ATAD2	20.7889	22.3846	-0.135931	-0.0457308
ATAD2B	6.76035	10.9987	-0.686181	-0.266727
ATAT1	60.055	69.6153	-0.228025	-0.153544
ATE1	9.50332	13.8065	-0.551331	-0.303215
ATF1	16.8392	16.8133	-0.00782427	-0.00287581
ATF2	21.1157	23.2178	-0.147989	-0.0567948
ATF3	38.6956	3.64105	3.42935	2.72122
ATF4	501.587	182.142	1.4922	1.3724
ATF5	99.0303	299.709	-1.6036	-2.69849
ATF6	15.7539	16.7858	-0.127381	-0.038673
ATF6B	26.6438	57.7497	-1.12323	-1.08285
ATF7IP	23.3927	21.8463	0.0816256	0.0352797
ATG10	13.6302	7.67295	0.803901	0.498429
ATG101	57.7441	31.525	0.87992	0.717875
ATG12	48.1259	57.7461	-0.274472	-0.197906
ATG13	61.8574	34.6793	0.841809	0.656967
ATG14	19.3031	19.3538	-0.0171881	-0.00806398
ATG16L1	19.2193	26.0736	-0.453661	-0.304548
ATG16L2	3.68276	21.4555	-2.58192	-3.30213
ATG2A	24.4819	40.9124	-0.750626	-0.524679
ATG2B	3.41294	24.4623	-2.88917	-2.70258
ATG3	42.9027	37.9499	0.153514	0.0719198
ATG4B	64.2388	45.6948	0.472203	0.46441
ATG4C	11.5219	21.0886	-0.890264	-0.519753
ATG4D	45.7617	33.5752	0.441585	0.283551
ATG7	38.9058	21.6473	0.807805	0.433795
ATG9A	106.597	72.5884	0.541911	0.367308
ATHL1	13.3307	69.0805	-2.38291	-4.80171
ATIC	90.815	67.51	0.412894	0.247373
ATL3	70.8467	65.4502	0.0929324	0.0440496
ATM	10.2114	4.96104	1.08139	0.617636
ATMIN	14.3951	7.86837	0.839742	0.552631
ATOH8	82.383	149.99	-0.897122	-0.842306
ATOX1	250.617	269.497	-0.111054	-0.0712885
ATP10A	7.08179	15.0234	-1.07657	-0.314834
ATP11A	11.9557	30.5204	-1.37526	-1.65577
ATP11B	11.896	14.5163	-0.280334	-0.117345
ATP13A1	77.7956	62.6388	0.310285	0.163426
ATP13A2	139.605	62.049	1.19091	0.711026
ATP13A3	23.1888	65.3471	-1.50382	-2.29888
ATP1A1	184.91	469.601	-1.32553	-1.48347
ATP1A2	122.097	380.749	-1.56901	-0.601576
ATP1B1	50.1375	321.66	-2.67561	-8.37954
ATP1B2	15.4049	2739.62	-7.47347	-10.7079
ATP1B3	49.6405	25.8063	0.94418	0.670271
ATP2A2	189.97	180.951	0.0771947	0.0352797
ATP2B1	12.3545	16.8853	-0.46927	-0.279236
ATP2B4	67.8034	54.1903	0.313194	0.135988
ATP2C1	34.6455	23.9	0.536589	0.406721
ATP5A1	158.905	853.366	-2.41401	-4.40361
ATP5B	966.062	1479.41	-0.594798	-0.390367
ATP5C1	290.537	598.656	-1.06778	-0.704836
ATP5D	758.425	1412.49	-0.90129	-1.43998
ATP5F1	122.787	139.915	-0.189765	-0.0568084
ATP5G1	55.8242	324.56	-2.54142	-2.94969
ATP5G2	600.059	137.324	2.12744	6.40657
ATP5G3	501.073	1190.92	-1.22216	-1.27352
ATP5I	336.412	239.877	0.510936	0.300054
ATP5J	358.895	634.149	-0.844464	-0.766522
ATP5J2	470.212	398.949	0.240993	0.183852
ATP5S	12.1479	8.79751	0.467178	0.225451
ATP5SL	58.0282	35.684	0.700372	0.463201
ATP6AP1	261.258	238.219	0.131425	0.0709872
ATP6AP2	65.4391	36.63	0.816865	0.921346
ATP6V0A1	58.1171	153.82	-1.43142	-1.84053
ATP6V0A2	25.7315	49.6956	-0.947424	-0.662684
ATP6V0B	128.175	275.195	-1.10664	-1.56515
ATP6V0C	832.635	1365.89	-0.73913	-0.748121
ATP6V0D1	206.571	185.317	0.14374	0.102994
ATP6V0E1	204.258	645.262	-1.68697	-2.80806
ATP6V0E2	78.5284	241.308	-1.54347	-0.62697
ATP6V1A	23.5547	45.256	-0.95821	-0.909244
ATP6V1B2	40.2066	48.4751	-0.285919	-0.134381
ATP6V1C1	10.8061	20.8692	-0.962514	-0.664177
ATP6V1D	21.6521	39.7807	-0.902436	-0.562751
ATP6V1E1	30.1975	61.7984	-1.05934	-0.809604
ATP6V1F	277.561	76.6851	1.86014	3.78041
ATP6V1G1	129.966	250.05	-0.965396	-0.96426
ATP6V1G2	15.4523	10.1655	0.607217	0.214594
ATP6V1H	34.5603	51.4411	-0.581479	-0.562292
ATP7A	2.37673	21.1677	-3.16661	-2.13221
ATP8B2	38.988	27.4967	0.505816	0.240448
ATP9A	23.9177	14.0775	0.800936	0.570754
ATP9B	15.7991	26.0736	-0.739135	-0.535255
ATPAF1	28.0379	6.76779	1.95106	1.9936
ATPAF2	59.6401	42.6161	0.468131	0.448478
ATPIF1	585.97	991.597	-0.788709	-1.16359
ATRAID	201.334	143.713	0.466256	0.265099
ATRN	22.943	13.7825	0.725696	0.52421
ATRNL1	4.42872	19.6416	-2.14134	-1.13417
ATRX	9.98741	12.6615	-0.335859	-0.0998912
ATXN1	36.0583	30.1295	0.239066	0.144833
ATXN10	155.845	262.155	-0.741966	-0.660001
ATXN1L	16.1461	13.1963	0.293067	0.153375
ATXN2	82.0946	107.185	-0.389151	-0.299534
ATXN2L	300.259	227.258	0.394043	0.258132
ATXN7L1	6.50315	13.7346	-1.06601	-0.712792
ATXN7L2	11.5431	11.7804	0.00269099	0.000981615
ATXN7L3	62.3942	67.5003	-0.116844	-0.057359
ATXN7L3B	94.7635	157.176	-0.740928	-1.18745
AUH	14.4487	84.0356	-2.55753	-6.36803
AUNIP	14.9115	3.46962	2.02007	1.10638
AUP1	103.3	252.061	-1.30641	-1.07986
AURKA	44.957	67.4514	-0.588534	-0.184198
AURKAIP1	296.865	356.153	-0.285189	-0.207785
AURKB	94.032	88.5436	0.0840125	0.0316739
AUTS2	35.2302	83.6351	-1.26578	-1.25388
AVEN	43.1193	16.1995	1.36769	1.28347
AVL9	32.2319	12.9289	1.36116	1.33253
AVPI1	8.09944	93.7383	-3.52233	-10.2306
AXIN1	19.2418	28.957	-0.597524	-0.356999
AXIN2	26.1663	30.2734	-0.23683	-0.119357
AXL	394.131	181.789	1.09645	0.756603
AZI2	23.3998	32.8414	-0.509743	-0.370137
AZIN1	208.915	229.067	-0.132634	-0.0711176
AZIN2	6.86128	57.1599	-3.06611	-6.10807
B2M	1268.76	1554.78	-0.352374	-0.161972
B3GALNT1	21.9071	14.9311	0.547896	0.342717
B3GALT4	9.8616	19.8237	-1.01831	-0.426596
B3GALT6	28.6348	19.5253	0.555904	0.295784
B3GAT1	4.33345	10.7482	-1.24386	-0.212186
B3GAT3	84.9869	89.5936	-0.0804285	-0.038031
B3GLCT	15.8397	6.37695	1.23491	0.631394
B3GNT2	11.6336	22.6352	-0.983938	-0.40445
B3GNT5	12.1896	6.20551	0.89143	0.331142
B3GNT9	9.31212	30.5586	-1.77814	-0.442026
B3GNTL1	12.553	10.8272	0.250907	0.0917408
B4GALNT1	13.4269	25.3986	-0.96538	-0.303782
B4GALNT4	31.8382	2.68793	3.52857	3.36589
B4GALT1	222.684	107.721	1.01602	0.569269
B4GALT2	124.68	66.6982	0.891616	0.770093
B4GALT3	108.069	97.4584	0.141629	0.101865
B4GALT4	15.7636	36.0161	-1.20998	-1.11914
B4GALT5	108.469	65.0798	0.731845	0.617923
B4GALT6	5.17016	31.3021	-2.58911	-3.79416
B4GALT7	48.1556	41.941	0.191554	0.0791019
B4GAT1	69.4179	92.5249	-0.415903	-0.24364
B9D1	42.2882	128.311	-1.60849	-2.86863
B9D2	9.75837	31.8883	-1.72234	-1.58306
BAALC	156.668	0.195421	9.01092	7.12882
BACE1	116.453	86.7271	0.421212	0.402957
BACE2	100.627	76.6132	0.396116	0.254086
BACH1	15.856	8.94497	0.874007	0.538046
BACH2	20.1116	1.17253	3.7994	2.65589
BAD	68.6836	131.12	-0.948444	-0.876903
BAG1	49.7914	132.096	-1.3963	-1.58916
BAG2	25.105	43.857	-0.817606	-0.554122
BAG3	296.247	330.011	-0.18512	-0.100135
BAG4	19.1083	18.2808	0.0829948	0.0352171
BAG5	19.9295	13.2922	0.537691	0.293215
BAG6	233.906	268.243	-0.215261	-0.156635
BAHD1	22.2043	26.5915	-0.255038	-0.112899
BAIAP2	33.4558	111.845	-1.76272	-1.41557
BAIAP2L1	24.087	3.95995	2.73878	1.78141
BAK1	36.7047	314.737	-3.12333	-7.84596
BAMBI	7.38696	92.2423	-3.60239	-2.31251
BANF1	487.064	342.963	0.48848	0.676334
BANP	40.464	35.7763	0.173096	0.101064
BAP1	86.4304	52.4386	0.703419	0.904952
BARD1	11.3443	13.5596	-0.292615	-0.0935992
BASP1	612.587	190.614	1.65751	3.97621
BATF	0	12.3702	-7.74781	-0.807219
BAX	167.25	564.305	-1.78555	-2.31286
BAZ1A	14.249	5.18044	1.42712	0.986602
BAZ1B	24.8646	40.8129	-0.727976	-0.524256
BAZ2A	75.925	281.225	-1.88625	-4.76158
BAZ2B	15.5637	38.4438	-1.3163	-1.2435
BBS2	21.712	18.716	0.186435	0.0748052
BBS7	25.3916	15.1505	0.724407	0.603836
BBX	12.305	16.7618	-0.478015	-0.235549
BCAM	128.23	31.9567	2.04172	1.48969
BCAN	0.734201	44.5187	-6.09093	-7.56229
BCAP29	33.3175	6.52441	2.30716	2.29674
BCAP31	92.2425	44.008	1.05064	1.46551
BCAR1	147.477	254.5	-0.788479	-0.927567
BCAR3	81.5764	48.4644	0.79843	0.162756
BCAS2	23.0217	127.019	-2.47905	-4.69636
BCAS3	21.5249	26.5125	-0.325075	-0.202625
BCAT1	57.5651	34.936	0.731381	0.345078
BCAT2	100.363	107.974	-0.118475	-0.0572713
BCCIP	61.341	41.344	0.539255	0.315292
BCDIN3D	13.6318	8.43065	0.676054	0.359172
BCKDHA	146.914	93.351	0.652432	0.726991
BCKDHB	22.3741	46.178	-1.05538	-0.762552
BCKDK	222.106	213.345	0.0492951	0.0255928
BCL10	20.1591	133.416	-2.735	-8.91835
BCL11A	25.399	10.5323	1.28888	0.617139
BCL2	5.74952	21.0886	-1.90681	-1.49882
BCL2L1	238.87	384.854	-0.681741	-0.608228
BCL2L11	15.3708	79.7062	-2.40592	-1.7081
BCL2L12	56.7018	72.7563	-0.373177	-0.249345
BCL2L13	49.8336	38.4607	0.351836	0.257052
BCL2L2	33.1655	20.9687	0.678343	0.515568
BCL2L2-PABPN1	32.4835	20.9687	0.648491	0.486847
BCL3	166.275	22.2203	2.87591	2.38245
BCL6	61.1196	34.4048	0.814641	0.696644
BCL7A	9.40052	21.7193	-1.22178	-0.661239
BCL7B	64.884	80.0348	-0.313627	-0.235818
BCL7C	117.717	133.496	-0.207851	-0.098437
BCL9	36.6952	15.226	1.29574	1.20912
BCL9L	86.4926	11.513	2.9589	3.15519
BCLAF1	31.9816	17.2522	0.860245	0.548426
BCOR	13.6612	30.1367	-1.15637	-0.720815
BCORL1	17.9198	30.9627	-0.799301	-0.547628
BCR	23.0156	43.9085	-0.934846	-0.694239
BCS1L	32.8562	24.9251	0.38419	0.225239
BDH1	14.2715	112.083	-2.93509	-2.37644
BDH2	18.032	1.71083	3.4986	2.33444
BDNF	12.4508	19.7482	-0.674412	-0.221797
BECN1	53.2718	50.7278	0.0507859	0.030528
BEND5	14.115	17.6741	-0.353326	-0.0791842
BET1	53.8297	88.4966	-0.755849	-0.534458
BEX3	466.807	3.98393	7.08793	27.9684
BFAR	123.504	13.2682	3.16162	8.41259
BGN	774.128	6681.83	-3.15959	-1.34603
BHLHE40	90.5984	75.8652	0.273284	0.120216
BHLHE41	65.0522	19.9845	1.7657	0.656023
BICC1	25.6928	43.2646	-0.780698	-0.319328
BICD1	16.447	5.64323	1.44599	0.704102
BICD2	12.5921	27.4176	-1.14113	-1.04657
BICDL1	0.070897	25.8578	-7.80336	-6.04708
BID	75.568	4.7896	3.95721	9.26385
BIN1	93.9936	90.8417	0.0382491	0.0187468
BIN3	34.4867	31.9878	0.100754	0.0539315
BIRC2	68.6107	0	9.13024	6.89461
BIRC5	291.746	108.316	1.41666	1.55564
BIRC6	16.1652	27.9355	-0.787749	-0.519615
BIRC8	0	19.5253	-8.33322	-6.37548
BIVM	11.1066	7.64897	0.545616	0.261118
BLCAP	147.857	180.79	-0.349172	-0.115236
BLMH	28.7459	24.7776	0.189132	0.109138
BLOC1S2	13.7202	27.7365	-1.01808	-0.929901
BLOC1S4	40.1331	30.6234	0.39814	0.228539
BLOC1S6	29.2882	52.5897	-0.860762	-0.743872
BLVRA	17.2501	16.0556	0.103353	0.043331
BLVRB	111.993	160.565	-0.558032	-0.256008
BMF	10.9213	7.94389	0.489352	0.1372
BMP1	36.9528	82.3079	-1.1581	-1.07356
BMP2	12.7307	0.781684	3.7667	1.53586
BMP2K	14.6474	21.4795	-0.56501	-0.357287
BMP4	46.9342	6.81932	2.85686	2.33411
BMP6	0.070897	48.0088	-8.6635	-7.34941
BMP7	5.09374	85.4153	-4.10314	-0.747838
BMPR1A	6.57548	42.3211	-2.69893	-3.48123
BMS1	13.6931	22.6316	-0.759099	-0.308641
BMT2	13.9449	24.6577	-0.822638	-0.734879
BNC1	13.0699	0	6.74371	3.1718
BNC2	39.7684	12.9325	1.57523	0.375229
BNIP1	29.3786	19.4497	0.556599	0.362207
BNIP2	23.5554	58.113	-1.31058	-2.16459
BNIP3	39.0285	34.7992	0.166353	0.0840347
BNIP3L	58.5913	33.4037	0.787592	0.958256
BOC	112.086	65.8242	0.734228	0.293806
BOD1L1	12.2324	13.6351	-0.185457	-0.0826973
BOK	144.183	25.1996	2.52914	3.069
BOLA1	40.3329	114.982	-1.52281	-3.23337
BOLA3	83.334	173.078	-1.06497	-1.02735
BORA	4.93367	11.5574	-1.24734	-0.573545
BORCS5	21.9915	36.6024	-0.738176	-0.454106
BORCS6	15.9962	93.2479	-2.55424	-5.7695
BPGM	10.2272	19.813	-0.971641	-0.320945
BPHL	56.1361	56.4394	-0.0170434	-0.00734246
BPNT1	27.5283	42.7804	-0.649137	-0.261592
BPTF	14.8715	15.5449	-0.0483479	-0.0138743
BRAF	20.4835	30.6403	-0.596339	-0.373643
BRAP	29.5952	43.7406	-0.578776	-0.579133
BRAT1	33.2813	41.4471	-0.31812	-0.206002
BRD1	61.0066	102.553	-0.754391	-0.86381
BRD2	215.243	63.4577	1.75515	3.86276
BRD3	61.5599	56.2343	0.127958	0.070108
BRD4	128.877	94.3424	0.428506	0.240448
BRD7	35.4155	35.1865	-0.013595	-0.00753976
BRD8	18.5337	20.8932	-0.191935	-0.0830202
BRD9	80.758	18.5961	2.09408	4.52573
BRE	81.1748	92.754	-0.200228	-0.135377
BRF1	36.2655	29.0254	0.322078	0.129509
BRF2	37.4319	30.452	0.305108	0.175761
BRI3	158.786	453.54	-1.53962	-1.66937
BRI3BP	16.5921	91.5274	-2.485	-5.08075
BRIX1	10.9286	15.1505	-0.489416	-0.228122
BRK1	353.462	608.579	-0.804736	-1.53114
BRMS1	90.5157	53.8137	0.751421	0.652801
BRMS1L	4.13323	12.3151	-1.5944	-1.14565
BRPF1	24.073	26.7079	-0.171927	-0.0872032
BRPF3	49.4374	21.1402	1.25029	1.53213
BRWD1	20.6198	44.9371	-1.13953	-1.44948
BRWD3	2.99931	14.8591	-2.3126	-1.85249
BSCL2	148.272	231.78	-0.66217	-0.708367
BSDC1	73.4006	38.951	0.896722	1.20832
BSG	1110.77	2327.15	-1.10831	-0.925402
BSN	4.16033	10.265	-1.31014	-0.562754
BST1	33.2292	2.24913	4.11405	2.42959
BST2	2.27887	420.111	-7.58895	-17.2262
BTAF1	14.5774	8.01583	0.87895	0.487657
BTBD1	29.2179	42.2456	-0.547529	-0.366109
BTBD10	13.9723	15.7607	-0.202897	-0.0907225
BTBD11	16.5903	1.73481	3.13458	2.32391
BTBD17	0.141794	35.2273	-7.52823	-4.59635
BTBD19	12.3605	17.77	-0.522103	-0.192786
BTBD2	74.5442	145.403	-0.970425	-0.453721
BTBD3	33.4418	16.347	0.992823	0.885748
BTBD6	28.656	39.4689	-0.464769	-0.27339
BTBD7	13.2323	13.954	-0.0763092	-0.0314126
BTBD9	8.13901	12.1197	-0.611436	-0.287403
BTD	18.8296	73.3017	-2.00804	-1.83532
BTF3	931.473	128.301	2.83054	8.95411
BTF3L4	10.1656	106.688	-3.38704	-11.1567
BTG1	209.887	175.197	0.232015	0.10285
BTG2	100.554	95.2741	0.102632	0.0322957
BTRC	7.15892	22.8714	-1.67944	-1.18703
BUB1	16.0089	5.009	1.60457	0.865673
BUB3	69.8465	116.332	-0.754621	-0.505915
BUD13	37.2916	37.3672	-0.00571804	-0.00287581
BUD31	134.979	45.2525	1.55723	2.77632
BVES	12.6657	2.27311	2.60497	1.09126
BYSL	74.2378	48.9175	0.589024	0.501036
BZW1	58.9684	32.5501	0.826346	0.59702
BZW2	52.3102	32.9338	0.646646	0.285487
C10orf105	0	12.1161	-7.58444	-1.70364
C10orf2	23.1792	11.338	0.993314	0.803783
C10orf35	4.55876	10.2889	-1.18029	-0.605218
C10orf54	19.6316	67.6947	-1.74678	-0.717875
C10orf76	21.3449	10.3609	1.01401	0.803799
C10orf88	5.83303	24.8771	-2.09721	-3.0138
C11orf1	27.7354	23.0189	0.248155	0.122424
C11orf24	121.786	89.1992	0.44109	0.43141
C11orf31	559.242	220.488	1.35212	1.93911
C11orf49	100.019	78.6455	0.365426	0.160202
C11orf57	16.8888	7.47753	1.15264	0.909808
C11orf58	106.789	97.4921	0.10668	0.0406429
C11orf68	66.6599	74.6217	-0.189338	-0.0734626
C11orf70	17.6127	30.2734	-0.798046	-0.460977
C11orf74	8.36734	18.6441	-1.18718	-0.459706
C11orf80	13.1668	0	6.73858	3.64106
C11orf84	34.1056	55.3567	-0.704334	-0.42964
C11orf95	31.9445	50.1283	-0.660499	-0.384142
C11orf96	46.2217	25.5042	0.860689	0.265401
C12orf10	136.494	76.8698	0.830184	0.824864
C12orf29	18.1532	7.13465	1.28318	0.636369
C12orf43	29.3529	185.489	-2.67931	-9.33964
C12orf45	39.0824	14.3173	1.39672	1.19562
C12orf49	45.456	26.9033	0.733855	0.712421
C12orf57	501.292	551.792	-0.139513	-0.0971854
C12orf65	25.0368	38.2413	-0.631694	-0.456977
C12orf73	37.3379	11.0466	1.79825	2.13974
C12orf75	145.387	123.156	0.198598	0.071298
C14orf1	201.343	274.493	-0.485587	-0.321052
C14orf119	73.4744	29.1116	1.30358	0.823391
C14orf159	26.9653	39.5924	-0.560528	-0.363827
C14orf166	237.778	202.106	0.22605	0.200271
C14orf169	23.8121	14.4443	0.755454	0.470859
C14orf2	345.095	672.623	-0.974977	-2.19228
C14orf37	49.3633	6.32899	2.93135	6.5196
C14orf79	8.58818	75.2932	-3.15918	-9.14801
C14orf80	17.376	28.0039	-0.702893	-0.620291
C14orf93	18.7955	13.906	0.45521	0.240316
C15orf39	25.5892	71.8812	-1.48924	-1.44601
C15orf40	15.4068	48.8491	-1.67268	-3.2082
C15orf41	15.7471	19.4018	-0.323828	-0.176956
C15orf52	12.9888	10.9951	0.207067	0.067597
C15orf57	38.8193	21.7708	0.797121	0.532883
C15orf61	36.694	66.4406	-0.855662	-0.702479
C15orf65	3.78061	61.4724	-4.01776	-5.46274
C16orf13	184.798	119.187	0.646075	0.494099
C16orf45	51.6653	47.8062	0.154933	0.0340845
C16orf46	2.22769	10.9711	-2.36214	-1.66786
C16orf52	9.36661	16.347	-0.83093	-0.552184
C16orf58	43.9622	54.2321	-0.30187	-0.121717
C16orf59	25.3003	25.9298	-0.0286347	-0.0127768
C16orf62	40.3694	37.2882	0.088734	0.039818
C16orf70	20.3482	58.8467	-1.54153	-2.01511
C16orf72	77.1968	54.249	0.49987	0.525816
C16orf87	9.73616	22.604	-1.222	-1.11895
C16orf90	0	12.0717	-7.63887	-4.52544
C16orf91	29.5211	55.3771	-0.9103	-0.734144
C17orf53	15.9792	3.44563	2.20385	1.53824
C17orf58	12.8679	2.46853	2.53371	1.77997
C17orf62	50.8414	24.2909	1.0691	1.0959
C17orf75	13.9532	8.67404	0.62336	0.320945
C17orf89	179.872	94.6542	0.911781	0.941436
C17orf97	27.0281	1.56337	3.78268	3.70979
C18orf21	22.4075	3.88444	2.3598	1.96436
C18orf25	11.8348	14.1218	-0.296586	-0.108612
C18orf32	102.148	186.633	-0.859665	-0.820867
C18orf54	12.0418	4.5702	1.43562	0.742498
C18orf8	23.8331	20.6223	0.173187	0.0813027
C19orf12	27.5755	38.6668	-0.501004	-0.23691
C19orf24	86.1975	19.186	2.18646	2.35823
C19orf25	41.8575	113.552	-1.45992	-1.42332
C19orf43	563.869	261.759	1.09828	1.8746
C19orf44	10.1352	5.96213	0.711759	0.332716
C19orf47	17.0975	19.5492	-0.205406	-0.101959
C19orf52	23.2837	40.0276	-0.790457	-0.785176
C19orf53	438.954	319.556	0.462141	0.45062
C19orf54	44.7745	25.6588	0.791028	0.859947
C19orf60	60.2068	196.569	-1.70918	-3.57333
C19orf66	50.9442	57.6573	-0.197442	-0.0851649
C19orf70	162.88	296.613	-0.872066	-0.784101
C1D	7.20531	54.2934	-2.92091	-5.85728
C1GALT1	12.6294	5.89018	1.17373	0.650634
C1GALT1C1	23.0777	18.8875	0.250567	0.112952
C1QA	0	37.9402	-9.3594	-1.71653
C1QB	0.283588	55.5904	-7.48025	-4.26466
C1QBP	370.323	203.625	0.858004	1.3395
C1QC	0	85.6107	-10.5363	-2.00938
C1QL1	56.2625	77.1142	-0.452075	-0.117345
C1QTNF1	11.3429	83.7647	-2.90026	-5.96558
C1QTNF5	35.7734	193.458	-2.46003	-2.26678
C1QTNF6	82.4282	195.568	-1.25914	-1.47192
C1RL	63.6585	2.10167	4.9763	9.85012
C1orf112	14.031	4.22732	1.67774	0.870024
C1orf122	166.661	88.7497	0.920857	0.865199
C1orf123	64.5326	20.6702	1.59667	1.97847
C1orf131	6.36817	44.3473	-2.79772	-4.2963
C1orf174	39.8932	34.4839	0.201858	0.101625
C1orf198	207.846	301.706	-0.52695	-0.464796
C1orf21	28.9033	19.7651	0.514844	0.224649
C1orf216	31.2285	30.5	0.0397695	0.0173634
C1orf27	4.09481	11.2181	-1.42783	-0.846562
C1orf35	41.1043	41.4986	-0.0164268	-0.00775124
C1orf43	235.601	7.42957	5.07511	19.725
C1orf50	17.9567	29.7147	-0.74392	-0.689728
C1orf52	48.6762	60.6331	-0.32611	-0.233239
C1orf53	10.0798	56.3506	-2.49732	-4.4707
C1orf54	15.5448	5.06054	1.6338	0.407117
C1orf56	12.2067	0	6.63173	3.52386
C2	3.60548	26.3517	-2.9212	-1.66001
C20orf194	21.1066	46.7199	-1.16166	-1.24781
C20orf196	6.21261	12.1952	-0.953713	-0.501593
C20orf27	144.736	118.565	0.254237	0.120469
C20orf96	20.0864	1.95421	3.06477	2.57316
C21orf2	25.7055	137.171	-2.43082	-6.59673
C21orf58	17.3195	0	7.12461	3.83426
C21orf91	12.0735	5.74272	1.06406	0.573601
C22orf23	2.29859	85.1423	-5.21928	-7.93581
C22orf29	55.6263	14.6637	1.95609	2.92618
C22orf39	75.5812	8.65006	3.07306	7.94353
C2CD2	18.1669	11.6089	0.684324	0.405259
C2CD2L	10.4681	45.3076	-2.11784	-4.23008
C2CD3	13.1295	13.3162	-0.0572967	-0.0158347
C2orf40	3.70262	679.179	-7.46317	-6.87769
C2orf42	68.6726	15.3459	2.13224	4.45873
C2orf47	21.5733	86.5939	-2.02712	-2.33398
C2orf49	21.0985	18.0818	0.187542	0.0925281
C2orf50	1.48073	13.0692	-3.15681	-1.25093
C2orf68	58.6989	9.7986	2.5382	5.49371
C2orf69	10.7247	8.57811	0.354459	0.148115
C2orf72	0.701727	22.8643	-5.04396	-1.72335
C2orf74	11.298	0	6.49022	2.74733
C2orf76	11.9807	11.9003	-0.0112894	-0.00443024
C2orf81	9.45809	11.9722	-0.386988	-0.159277
C3orf14	21.2982	27.3217	-0.381333	-0.174061
C3orf18	16.1329	1.34397	3.52332	3.21711
C3orf33	3.34885	12.7575	-1.94886	-1.13476
C3orf38	13.0894	24.8292	-0.925603	-0.674319
C3orf58	11.5939	12.1712	-0.0414654	-0.0136777
C4orf3	211.903	125.719	0.741411	1.05715
C4orf32	11.5988	10.1175	0.198004	0.0669199
C4orf46	28.5633	18.8395	0.567197	0.337557
C4orf48	80.6424	250.897	-1.63241	-2.30107
C5orf15	217.871	358.336	-0.735865	-1.07628
C5orf22	16.7057	24.0715	-0.545347	-0.267118
C5orf24	57.7098	62.899	-0.136616	-0.0983021
C5orf30	24.0055	33.8701	-0.50569	-0.223494
C5orf34	6.29943	18.4007	-1.56406	-0.785656
C5orf42	11.9497	13.7346	-0.183516	-0.0780818
C5orf45	18.4389	12.3391	0.532885	0.276985
C5orf51	16.2924	23.7286	-0.554084	-0.335331
C5orf63	4.79087	11.386	-1.26423	-0.468362
C6orf106	9.25091	30.5995	-1.73129	-1.7505
C6orf120	23.5759	49.8058	-1.0841	-1.34336
C6orf136	44.5524	183.216	-2.05736	-6.2695
C6orf141	3.62549	13.2478	-1.86229	-1.0057
C6orf203	10.5465	11.6533	-0.17361	-0.0465712
C6orf226	45.0338	94.671	-1.07296	-1.11872
C6orf47	46.9447	43.4457	0.0925912	0.0532978
C6orf62	121.939	225.032	-0.879975	-1.13476
C6orf89	109.386	223.922	-1.04269	-2.03904
C7orf26	41.8073	52.9397	-0.354643	-0.174645
C7orf43	32.1616	28.9606	0.159036	0.0750753
C7orf49	60.0664	20.7733	1.55709	2.50707
C7orf50	213.675	35.5773	2.57456	7.06673
C7orf55	66.4788	31.422	1.07741	0.801935
C8orf33	94.0479	90.3478	0.051393	0.0325403
C8orf4	0	93.0382	-10.5575	-11.0466
C8orf59	140.623	195.093	-0.5205	-0.247445
C9	85.0373	0	9.43444	7.61139
C9orf114	47.8455	43.1544	0.139172	0.070901
C9orf116	17.2813	19.4497	-0.204601	-0.0949708
C9orf142	63.0552	188.728	-1.58718	-2.96009
C9orf16	191.169	351.157	-0.877851	-0.760347
C9orf3	97.525	8.67404	3.43488	6.96631
C9orf40	29.9688	51.0743	-0.775923	-0.944263
C9orf64	16.3251	70.97	-2.14425	-2.83922
C9orf78	33.2558	103.078	-1.66255	-1.98698
CA11	7.17154	13.7586	-0.948161	-0.604697
CA12	41.8498	1.53939	4.65113	5.98254
CA13	12.2022	44.6157	-1.95333	-0.518901
CA14	1.57815	109.452	-6.19805	-7.06191
CA2	1.8545	56.991	-4.91382	-2.53535
CA5B	1.07492	35.2513	-4.97931	-3.78041
CAAP1	23.8362	18.2532	0.353053	0.215128
CAB39	15.967	29.3514	-0.879309	-0.676015
CAB39L	10.3483	9.97004	0.03303	0.0110849
CABIN1	81.3432	54.225	0.571077	0.713662
CABLES1	20.2393	16.7138	0.285936	0.0687816
CABLES2	13.0697	9.75064	0.423519	0.195148
CABP7	46.0116	1.12456	5.67655	2.4984
CACFD1	17.8804	93.5536	-2.39848	-2.29652
CACHD1	3.06426	35.5498	-3.53954	-4.97054
CACNA1A	10.6777	25.8507	-1.29344	-0.829193
CACNA1C	23.5473	0.562282	6.18345	4.07732
CACNA1G	1.19163	20.9998	-4.22836	-1.25033
CACNA2D1	12.9263	11.1665	0.16875	0.0655681
CACNB3	37.4077	59.0901	-0.666181	-0.539689
CACNG4	20.9521	8.13931	1.36292	0.330044
CACNG5	1.26252	28.336	-4.44735	-1.23034
CACNG7	10.2285	57.9859	-2.51855	-2.28869
CACTIN	42.2461	31.2061	0.42965	0.381248
CACUL1	57.1528	38.5842	0.543885	0.49055
CACYBP	69.3999	43.0477	0.672383	0.274772
CAD	122.028	68.5183	0.818027	1.19355
CADM1	71.7982	83.8871	-0.16538	-0.036027
CADM3	72.0883	20.7218	1.81197	1.26144
CADM4	23.9931	170.497	-2.77152	-1.86144
CALCA	0.456993	16.395	-5.45232	-3.41294
CALCOCO1	37.1353	35.8518	0.053439	0.0201697
CALCOCO2	29.8454	0	7.91735	5.31909
CALCRL	12.8997	7.87194	0.685044	0.109211
CALD1	235.98	132.782	0.813666	0.786798
CALHM2	33.8167	76.1994	-1.26453	-0.383823
CALM1	186.78	270.002	-0.538459	-0.231483
CALM3	697.9	1105.52	-0.674161	-0.906987
CALR	6446.43	1469.93	2.13257	9.07861
CALU	164.247	164.464	-0.0198176	-0.00775124
CAMK1	33.0326	140.76	-2.10243	-7.10126
CAMK1D	10.8566	5.7667	0.866516	0.410596
CAMK2A	0.173837	27.1635	-7.67432	-0.79972
CAMK2D	85.6124	153.949	-0.853984	-1.36991
CAMK2G	46.8558	73.1737	-0.62269	-0.324133
CAMK2N1	235.658	86.8649	1.36642	0.797751
CAMK2N2	3.0067	38.3995	-3.73091	-3.9934
CAMKK2	30.8437	17.1766	0.802914	0.576916
CAMKMT	10.6242	7.45355	0.516703	0.231006
CAMLG	52.7164	59.0386	-0.168473	-0.0964881
CAMSAP1	34.6595	9.82258	1.75355	2.23177
CAMSAP2	3.79151	12.2911	-1.69847	-1.14111
CAMTA1	114.216	53.9949	1.07874	0.866269
CAMTA2	55.0984	34.2165	0.694034	0.413022
CAND1	29.7963	46.4801	-0.648687	-0.664288
CAND2	15.2765	29.1249	-0.950463	-0.726513
CANT1	95.9224	118.53	-0.323651	-0.234713
CANX	229.52	217.702	0.0542426	0.032098
CAP1	130.817	195.79	-0.595458	-0.403364
CAP2	23.6147	9.77105	1.2579	0.38228
CAPG	240.798	85.1566	1.48643	1.17932
CAPN1	196.654	143.96	0.423608	0.223913
CAPN10	16.3392	58.0615	-1.8454	-3.81438
CAPN15	17.4056	26.9548	-0.634385	-0.400373
CAPN2	201.305	176.41	0.170483	0.0985128
CAPN5	46.84	16.4705	1.50095	2.39701
CAPNS1	1259.86	1449.75	-0.200476	-0.155398
CAPRIN1	180.181	108.563	0.717458	0.694239
CAPZA2	34.0937	82.2972	-1.29592	-1.05368
CAPZB	507.024	537.533	-0.098282	-0.0690921
CARD10	32.4252	2.68793	3.55295	4.12036
CARD19	57.9612	158.228	-1.44775	-1.54784
CARHSP1	373.224	9.33582	5.39226	28.1859
CARM1	91.7975	52.1784	0.811351	0.865095
CARNMT1	11.0219	14.9311	-0.440211	-0.222702
CARS	96.9522	18.1298	2.41225	2.88156
CARS2	135.556	29.9581	2.15412	5.87651
CASC3	142.528	59.457	1.25748	2.97168
CASC4	46.152	22.9194	0.969846	1.0098
CASC5	13.2745	4.81358	1.3957	0.595572
CASD1	6.30192	13.779	-1.14921	-0.502868
CASK	11.738	26.4681	-1.17512	-1.01689
CASKIN2	18.264	50.1859	-1.46415	-1.54641
CASP2	28.2958	8.11176	1.71608	1.76749
CASP3	23.6866	9.28428	1.28441	0.634391
CASP6	25.5266	11.8283	1.11358	0.813429
CASP7	24.4926	30.9112	-0.356452	-0.2456
CASP8	16.918	6.81932	1.35356	0.689877
CASP9	14.0599	34.364	-1.29884	-1.02274
CASQ1	0.386528	71.1332	-7.47491	-1.30262
CAST	109.171	25.7379	2.08858	2.28118
CAT	46.6134	118.938	-1.36391	-3.1035
CAV1	955.162	226.314	2.05218	2.91637
CAV2	124.757	40.7542	1.59294	2.14928
CBARP	13.2155	25.2884	-0.949539	-0.582314
CBFA2T2	13.0563	10.7277	0.268671	0.119284
CBFB	31.7769	23.749	0.393972	0.164835
CBL	28.2011	42.5201	-0.605089	-0.581873
CBLB	57.1677	53.8688	0.0743544	0.0252177
CBLL1	27.0979	25.6109	0.0689092	0.0303629
CBR3	24.1853	45.654	-0.942735	-0.657493
CBR4	18.2182	13.6111	0.399438	0.193922
CBX1	89.2086	71.9568	0.295404	0.157765
CBX2	15.2234	11.6329	0.398665	0.178655
CBX3	104.212	53.8306	0.926579	0.842893
CBX4	42.3231	76.432	-0.887744	-0.471805
CBX5	149.507	45.2525	1.69078	1.89343
CBX6	261.977	194.064	0.401535	0.21812
CBX8	11.3761	19.162	-0.743394	-0.392486
CBY1	43.1786	98.6611	-1.18996	-1.2002
CC2D1A	35.8017	62.1076	-0.821841	-0.479426
CC2D1B	45.7638	26.5604	0.758582	0.630561
CC2D2A	25.4312	7.28211	1.78663	2.2869
CCAR1	36.2533	23.5367	0.623851	0.330236
CCAR2	162.835	110.497	0.548243	0.662433
CCBE1	12.5761	3.27419	1.91972	0.630561
CCDC102A	12.8755	72.4649	-2.51214	-4.56385
CCDC106	176.111	8.65006	4.31543	12.355
CCDC107	75.2963	100.386	-0.412668	-0.294767
CCDC109B	63.9295	3.05479	4.43972	8.97901
CCDC115	44.4041	28.8611	0.623348	0.592012
CCDC117	25.8089	8.8215	1.51949	1.46722
CCDC12	45.3135	35.5054	0.341022	0.232791
CCDC120	19.1423	7.38161	1.453	0.896907
CCDC122	6.44631	15.7643	-1.29329	-0.652496
CCDC124	168.014	172.772	-0.0547466	-0.0346678
CCDC126	6.2187	11.9722	-0.987748	-0.512892
CCDC127	14.6163	41.639	-1.52087	-2.16627
CCDC130	52.8705	12.5105	2.02381	3.60805
CCDC134	36.879	22.2851	0.696302	0.525843
CCDC136	6.5868	37.6994	-2.51536	-2.82917
CCDC137	55.7052	28.7136	0.952517	0.994372
CCDC14	21.5359	3.83648	2.45105	2.17331
CCDC157	6.18171	34.014	-2.48802	-3.21354
CCDC159	25.5942	5.009	2.28478	2.17921
CCDC167	54.1731	6.57237	2.92567	4.9068
CCDC174	17.0287	4.93706	1.8403	1.12228
CCDC189	11.2294	15.8087	-0.530419	-0.257976
CCDC22	35.5086	22.7719	0.619339	0.378231
CCDC25	11.3856	6.93923	0.652928	0.277328
CCDC28A	10.7461	22.628	-1.08429	-0.994543
CCDC28B	37.7856	32.7899	0.196339	0.0872046
CCDC3	9.91057	77.5484	-2.96308	-4.00795
CCDC34	13.195	43.9529	-1.74028	-1.26547
CCDC43	21.9997	17.4476	0.313429	0.135314
CCDC47	30.8245	23.0428	0.392513	0.235811
CCDC50	43.3374	13.683	1.60136	2.15943
CCDC51	24.6308	7.30609	1.69734	1.94216
CCDC53	28.2006	61.8944	-1.14791	-1.22872
CCDC57	13.7905	5.37586	1.31946	0.912676
CCDC58	3.58749	22.8234	-2.6556	-2.51834
CCDC59	30.7567	34.8268	-0.201844	-0.0840347
CCDC6	44.3298	40.6618	0.107871	0.0654445
CCDC61	15.7033	29.1524	-0.909533	-0.947272
CCDC71	83.1926	99.4198	-0.2705	-0.180139
CCDC71L	15.6169	41.7012	-1.45072	-0.784101
CCDC73	0	12.586	-7.70223	-4.58228
CCDC8	51.7235	0	8.72184	6.61617
CCDC80	154.45	19.7447	2.93316	6.23383
CCDC84	20.6863	9.84656	1.00182	0.67992
CCDC85C	45.5862	20.4508	1.16141	0.717176
CCDC86	150.574	43.6447	1.7846	2.49673
CCDC88A	12.2067	9.87412	0.352079	0.140085
CCDC88C	3.49659	17.9787	-2.32576	-0.657534
CCDC9	59.0555	30.1535	0.952857	1.08998
CCDC90B	43.0116	36.3662	0.235849	0.1282
CCDC92	65.0076	22.6724	1.4988	1.27352
CCDC93	11.9315	11.4854	0.0354726	0.00985982
CCDC94	39.1534	15.027	1.32674	1.54106
CCDC97	68.2818	86.2235	-0.360329	-0.21977
CCL2	491.906	4.00792	6.96936	13.0648
CCM2	88.4397	40.1955	1.12444	1.40083
CCNA2	53.9943	90.7412	-0.769004	-0.300854
CCNB1	113.359	1.93023	5.70791	7.72834
CCNB1IP1	13.7272	0.195421	5.47866	3.11566
CCNB2	86.5062	74.8294	0.208532	0.0581875
CCNC	32.5247	30.1499	0.0839155	0.0320684
CCND1	431.897	628.825	-0.539786	-0.246849
CCND2	17.1013	498.56	-4.85036	-6.83921
CCND3	189.376	483.381	-1.39947	-1.07132
CCNDBP1	27.5328	30.8632	-0.176926	-0.0871028
CCNE1	21.6255	53.1484	-1.31251	-1.14453
CCNF	41.9514	23.4541	0.813516	0.407808
CCNG1	104.871	143.877	-0.519888	-0.233691
CCNG2	15.3759	18.6201	-0.300821	-0.153287
CCNH	21.2315	29.0769	-0.478614	-0.259913
CCNI	360.111	26.2655	3.78496	7.42171
CCNJ	11.4241	5.74272	0.98406	0.524679
CCNJL	11.4918	7.57346	0.528676	0.184198
CCNK	127.069	0.757703	7.76279	10.0105
CCNL1	49.9678	42.7467	0.222418	0.102478
CCNL2	41.3907	47.8205	-0.207012	-0.0976244
CCNO	0.42495	18.541	-5.45004	-2.72654
CCNT1	15.5718	22.2132	-0.530219	-0.267244
CCNT2	12.9638	18.939	-0.551397	-0.312967
CCNY	86.3301	89.288	-0.0605363	-0.0369251
CCNYL1	21.4634	17.3516	0.321285	0.166831
CCPG1	9.50174	20.2314	-1.11412	-0.716684
CCS	36.8788	58.5278	-0.6738	-0.612767
CCSER2	14.2046	8.47862	0.688711	0.333175
CCT2	64.3512	137.948	-1.11791	-0.650066
CCT3	272.441	64.1568	2.089	2.27157
CCT4	203.036	52.9805	1.92852	5.59545
CCT5	72.5881	134.091	-0.895595	-0.669115
CCT7	390.748	29.4917	3.69458	13.9026
CCT8	53.2941	43.8401	0.263743	0.168062
CD109	34.2483	47.522	-0.488641	-0.220115
CD151	511.05	575.772	-0.183449	-0.0865322
CD164	118.888	237.995	-1.00756	-1.21478
CD200	16.6152	38.8719	-1.23828	-0.793761
CD248	34.347	121.278	-1.89843	-0.744873
CD276	90.3977	23.1388	1.92967	3.36791
CD2AP	21.816	14.4443	0.605429	0.300854
CD2BP2	95.2179	65.4359	0.537415	0.426995
CD302	13.6928	28.3024	-1.05017	-0.731095
CD320	92.1737	47.9991	0.942553	0.925402
CD34	6.0286	45.4897	-2.98695	-1.66722
CD3EAP	32.2361	33.7981	-0.0914159	-0.0342141
CD44	1374.34	286.376	2.27386	4.02704
CD46	54.9174	0	8.78504	6.44264
CD47	43.8182	92.6892	-1.09604	-1.73199
CD63	1386.74	1485	-0.115431	-0.0661809
CD68	28.6481	49.6007	-0.868648	-0.231973
CD70	27.1618	0.977105	4.54549	2.73113
CD74	564.229	0	12.2111	3.98676
CD81	1076.05	3189.04	-1.58812	-1.57582
CD82	52.4979	27.462	0.937645	0.425237
CD83	38.1314	1.12456	5.48063	2.82056
CD9	194.174	409.434	-1.03619	-0.735559
CD99L2	148.011	64.0164	1.20724	1.50583
CDAN1	24.3357	31.7204	-0.382648	-0.279417
CDC123	43.3561	27.4896	0.625425	0.401541
CDC14A	3.38627	13.2238	-1.96267	-1.03005
CDC16	15.528	37.8744	-1.302	-1.6176
CDC20	166.271	57.0088	1.51955	1.7266
CDC23	8.89902	23.1903	-1.38641	-1.23404
CDC25A	19.8228	26.3686	-0.433163	-0.175098
CDC25B	136.703	48.1838	1.47961	1.86022
CDC25C	18.6612	4.29926	2.02132	0.586367
CDC26	16.1555	26.8793	-0.751455	-0.556408
CDC27	22.2276	25.7583	-0.223277	-0.0988233
CDC37	322.979	177.088	0.869966	1.20109
CDC37L1	12.908	42.6604	-1.73488	-1.99217
CDC40	8.17858	14.1254	-0.786554	-0.392117
CDC42	477.076	216.814	1.10175	0.811008
CDC42BPA	16.0385	12.0237	0.434382	0.235511
CDC42BPB	64.5419	46.9189	0.453962	0.406952
CDC42BPG	1.46102	10.7793	-2.90654	-1.60444
CDC42EP1	447.595	269.026	0.751989	0.701066
CDC42EP2	45.1297	1.31998	5.56656	6.23962
CDC42EP3	27.3829	11.362	1.2147	1.14068
CDC42EP4	79.9965	276.185	-1.8407	-1.50014
CDC42EP5	13.7682	184.25	-3.79853	-2.51287
CDC42SE1	135.12	234.872	-0.796418	-1.08116
CDC42SE2	14.5188	87.1169	-2.56248	-1.88633
CDC45	51.8537	19.5457	1.36429	0.714499
CDC5L	15.5078	3.66504	1.97934	1.33418
CDC6	16.242	6.57237	1.23632	0.43807
CDC73	31.6012	19.5217	0.653548	0.374045
CDCA2	16.986	29.4162	-0.808215	-0.359465
CDCA3	136.198	90.059	0.5875	0.329496
CDCA4	74.6078	72.6088	0.0179247	0.00827514
CDCA5	92.8482	25.9226	1.81216	1.48477
CDCA7	61.0975	18.0782	1.7245	0.994789
CDCA7L	27.8732	4.29926	2.57983	1.2394
CDCA8	114.229	106.745	0.0941673	0.0325403
CDCP1	33.359	0	8.0624	4.9643
CDH1	0	10.8788	-7.54416	-2.16346
CDH11	389.472	142.888	1.39625	0.475014
CDH13	39.8211	35.8615	0.164932	0.0393254
CDH2	57.4245	267.302	-2.16631	-1.22984
CDH22	0.070897	13.5631	-6.86547	-4.32091
CDH24	44.4065	16.5939	1.4323	1.74391
CDH4	30.8235	18.9319	0.713285	0.195331
CDH5	15.9147	163.062	-3.46606	-0.512554
CDH6	114.924	16.8133	2.76858	3.82386
CDIP1	86.0742	149.927	-0.791826	-0.768497
CDIPT	90.9962	287.71	-1.6791	-2.00406
CDK1	49.8683	83.3871	-0.759455	-0.328812
CDK10	60.6622	42.9554	0.479512	0.355998
CDK12	16.3859	11.8283	0.489321	0.268202
CDK13	31.3901	19.6248	0.698537	0.544772
CDK14	24.2722	20.3549	0.226579	0.131506
CDK16	235.746	270.079	-0.203069	-0.182746
CDK17	22.5607	60.6392	-1.4157	-1.06915
CDK2	95.2268	51.8284	0.856524	0.955067
CDK20	10.3599	20.0911	-0.961095	-0.472821
CDK2AP2	159.421	204.538	-0.379474	-0.255011
CDK4	407.689	504.754	-0.324154	-0.291905
CDK5	36.275	123.069	-1.7704	-3.10833
CDK5R1	6.45705	10.3333	-0.687466	-0.179771
CDK5RAP1	33.3326	3.83648	3.07801	4.97525
CDK5RAP2	15.7542	7.18261	1.05864	0.435822
CDK5RAP3	37.0491	69.7592	-0.925067	-0.89258
CDK6	95.2437	15.1229	2.59425	3.35032
CDK7	15.5522	29.7866	-0.956998	-0.707219
CDK8	11.2553	17.1322	-0.593894	-0.323841
CDK9	47.1346	60.2866	-0.361494	-0.294767
CDKAL1	17.2539	8.9414	0.889169	0.322755
CDKL3	12.2402	7.42957	0.761942	0.409397
CDKN1A	435.766	644.47	-0.615494	-0.276503
CDKN1B	92.8695	379.341	-2.03551	-8.50115
CDKN1C	42.53	439.885	-3.4359	-2.1403
CDKN2AIP	7.9514	17.0567	-1.11963	-0.942127
CDKN2AIPNL	170.864	62.0898	1.43942	3.01711
CDKN2B	28.2744	108.024	-1.93615	-3.50455
CDKN2C	29.3513	38.0183	-0.390962	-0.223819
CDKN3	32.3746	20.4508	0.621338	0.256008
CDO1	9.79967	43.6687	-2.1552	-3.53325
CDON	10.2375	17.6154	-0.775483	-0.258423
CDPF1	21.1252	23.3138	-0.142145	-0.0734626
CDR2	20.7922	9.0409	1.15655	0.914083
CDR2L	45.3038	43.038	0.074168	0.033254
CDS2	55.9985	40.6103	0.446082	0.312057
CDT1	2.66397	35.7248	-3.73197	-4.14063
CDV3	131.029	72.2073	0.844798	1.23985
CEBPA	2.20611	133.401	-5.97417	-1.52645
CEBPB	126.224	389.33	-1.65638	-1.02696
CEBPD	1.98891	1334.1	-9.50941	-57.7095
CEBPG	22.6888	27.0987	-0.278694	-0.155701
CEBPZ	13.4077	8.03981	0.723785	0.337557
CEBPZOS	33.8862	29.2723	0.168107	0.0479992
CECR5	76.2474	18.9114	1.96146	3.27543
CELF1	91.9101	38.2413	1.24988	1.95024
CELF2	12.1449	174.852	-3.84364	-11.4231
CELSR1	26.9689	12.7024	1.13623	0.252415
CELSR2	20.9207	77.8291	-1.81561	-0.615312
CEMIP	284.032	421.679	-0.641834	-0.21442
CEND1	37.157	63.0562	-0.735621	-0.330227
CENPA	291.552	129.952	1.18395	0.92339
CENPB	160.828	257.916	-0.697776	-0.52029
CENPF	16.8276	7.18261	1.15359	0.426538
CENPH	52.1924	4.39876	3.56881	5.79336
CENPI	13.0156	4.81358	1.36994	0.566592
CENPK	27.5903	6.54839	2.00655	0.995365
CENPL	14.865	5.42382	1.36236	0.583293
CENPM	79.3246	106.306	-0.422595	-0.192942
CENPN	31.9576	6.62033	2.17564	1.20419
CENPO	50.2485	4.64214	3.29025	4.92053
CENPP	20.033	19.5696	0.00289937	0.000972215
CENPT	62.7825	24.2189	1.38835	2.17488
CENPU	13.1697	1.73481	2.80871	1.40322
CENPV	101.329	34.4732	1.54246	1.49136
CENPW	61.6998	53.4637	0.174512	0.0665781
CEP104	20.8813	35.8207	-0.800053	-0.663973
CEP120	7.13484	19.0865	-1.41613	-1.20682
CEP131	35.3439	15.5893	1.13684	1.17318
CEP164	29.551	15.7367	0.882631	0.86381
CEP170	35.6888	29.7902	0.26235	0.156072
CEP170B	32.0822	61.8367	-0.968071	-0.662297
CEP19	4.4832	11.4099	-1.37189	-0.517931
CEP192	10.5014	8.65006	0.243308	0.0936209
CEP250	24.1703	10.5083	1.2058	0.975001
CEP295	10.1053	11.29	-0.174371	-0.0562053
CEP350	10.1625	4.37478	1.27068	0.605019
CEP41	25.1532	8.99294	1.46862	1.18073
CEP55	24.7425	6.40093	1.86894	0.811543
CEP57	17.6435	5.18044	1.73123	1.43428
CEP63	12.3478	10.7517	0.176511	0.0538442
CEP68	24.4136	19.3502	0.301997	0.128359
CEP76	7.57212	16.4669	-1.14593	-0.597127
CEP83	5.77038	10.3609	-0.864589	-0.399825
CEP85	24.5835	14.5606	0.713672	0.303618
CEP85L	19.8616	0.195421	6.01067	3.89064
CEP89	46.7056	11.2145	1.98311	2.10261
CEP95	19.6343	14.4443	0.472767	0.234617
CEPT1	25.8261	17.7425	0.541843	0.314387
CERCAM	159.414	60.9315	1.37462	1.437
CERK	44.9852	29.3922	0.594935	0.32674
CERS2	149.245	220.565	-0.559104	-0.498405
CERS4	12.5554	94.2036	-2.85594	-1.95629
CERS5	80.0623	77.1755	0.0440669	0.0276555
CERS6	25.2484	9.18836	1.45034	1.4648
CETN2	26.8253	31.0791	-0.244291	-0.0766626
CETN3	29.8632	51.8728	-0.811881	-0.55552
CFAP100	0.315631	11.8727	-5.27826	-2.38721
CFAP126	0.244734	24.7225	-6.84723	-4.0004
CFAP20	40.1405	101.339	-1.35561	-1.88497
CFAP36	24.9455	50.6523	-1.03733	-1.01037
CFAP43	1.03012	27.7533	-4.75315	-4.59879
CFAP54	1.24876	12.483	-3.31041	-1.44521
CFAP97	14.1639	2.66395	2.51441	1.91654
CFDP1	33.1127	36.6611	-0.154842	-0.0680709
CFI	30.3077	0.195421	6.63907	3.81313
CFL1	4295.12	4551.11	-0.0891282	-0.0685062
CFL2	147.89	225.508	-0.630028	-0.426538
CFLAR	27.2943	20.1631	0.449544	0.252415
CGGBP1	49.2023	48.5027	0.00497913	0.00220988
CGRRF1	7.80582	36.5305	-2.2336	-2.42943
CHAC1	70.5085	9.2603	2.99465	1.1791
CHAC2	4.65604	17.4236	-1.89731	-1.60759
CHADL	0.347673	12.6855	-5.56573	-2.28671
CHAF1A	39.6618	17.9583	1.10141	0.886476
CHAF1B	22.5348	16.3434	0.432332	0.112899
CHAMP1	53.0417	16.395	1.6403	2.26203
CHCHD1	179.59	85.2765	1.07392	1.2328
CHCHD10	111.517	463.834	-2.00233	-1.13514
CHCHD2	598.35	2.49251	7.87416	31.8075
CHCHD3	54.3963	95.7502	-0.810067	-0.55247
CHCHD5	92.2542	58.8467	0.653093	0.446993
CHCHD6	28.1003	64.8292	-1.2135	-1.52986
CHCHD7	23.2363	139.965	-2.61693	-5.54906
CHD1	0.322011	24.8567	-6.06857	-5.54906
CHD1L	19.117	9.14039	1.10764	0.831897
CHD2	215.845	30.6234	2.82767	5.41283
CHD3	92.121	19.8921	2.21232	4.81799
CHD4	136.815	88.3277	0.636335	0.516139
CHD6	12.8481	3.42165	1.98955	1.20168
CHD8	23.8475	0.586263	4.87665	4.48736
CHD9	24.5153	13.0488	0.879777	0.629224
CHEK1	15.6177	1.73481	3.04882	1.668
CHEK2	14.0432	11.5334	0.247855	0.108296
CHERP	146.57	125.593	0.20547	0.138491
CHFR	39.4187	40.3598	-0.0232152	-0.00753976
CHI3L1	3.72828	41.9675	-3.40376	-0.895657
CHIC2	71.7421	116.11	-0.710278	-0.814124
CHID1	108.048	41.4915	1.36804	2.42252
CHKA	26.2254	72.4267	-1.47928	-2.62241
CHL1	20.7399	0.781684	4.40684	2.39754
CHMP1A	129.654	107.189	0.263354	0.19811
CHMP2A	200.594	151.717	0.410472	0.327696
CHMP2B	19.4152	48.3624	-1.32969	-1.61492
CHMP4B	165.764	266.281	-0.70102	-0.996117
CHMP5	33.8184	38.2173	-0.193021	-0.101175
CHMP6	51.8941	55.3495	-0.097346	-0.0512511
CHMP7	49.7835	24.5067	0.998146	0.861276
CHN1	46.653	18.2497	1.32587	0.51272
CHORDC1	18.2385	31.4015	-0.806155	-0.49191
CHP1	235.555	160.627	0.561612	0.465155
CHPF	314.79	159.278	0.969833	0.765951
CHPF2	100.012	129.385	-0.385224	-0.226368
CHPT1	46.9699	102.93	-1.12421	-0.885748
CHRAC1	68.318	86.2608	-0.350228	-0.351467
CHRD	11.0668	24.0511	-1.12782	-0.468545
CHRDL1	62.6748	7.01117	3.04582	3.23588
CHRNA5	10.8704	0	6.44515	2.86863
CHST1	7.43786	45.6086	-2.60355	-1.04874
CHST10	29.0186	5.009	2.43942	3.29125
CHST11	24.8724	10.4088	1.22311	0.789954
CHST12	24.6424	127.301	-2.41386	-2.24867
CHST14	49.4237	64.6001	-0.403903	-0.170516
CHST15	48.0728	36.2774	0.349271	0.0837604
CHST2	13.9282	165.88	-3.57049	-7.60929
CHST3	50.4357	10.042	2.29409	2.2093
CHST7	16.1106	18.4247	-0.216665	-0.098437
CHST8	1.36503	10.0695	-2.97494	-1.30691
CHSY1	115.494	64.5859	0.83018	1.2984
CHTF18	13.1137	19.1584	-0.555245	-0.364171
CHTF8	189.854	268.202	-0.522394	-0.439182
CHTOP	150.94	43.96	1.76895	4.21924
CHUK	9.56175	22.1892	-1.21912	-0.857245
CHURC1	61.0261	85.4347	-0.500281	-0.373732
CIAO1	65.3153	48.3384	0.432778	0.380225
CIAPIN1	66.8152	35.4814	0.891497	1.14111
CIB1	87.8046	129.456	-0.562485	-0.576421
CIB2	42.9004	25.0486	0.776347	0.63839
CIC	62.2059	102.419	-0.727639	-0.830332
CIDEA	0	15.4418	-7.98513	-4.90326
CIITA	23.2968	0	7.57613	3.15614
CINP	43.1372	32.3715	0.405687	0.175047
CIPC	11.1519	39.0674	-1.81564	-1.73213
CIR1	10.3174	3.98393	1.43075	0.603442
CIRBP	672.307	232.319	1.53142	1.70243
CISD1	66.7754	250.485	-1.91226	-5.19364
CISD2	40.2272	94.8149	-1.25614	-1.75511
CISH	6.85125	30.7469	-2.17773	-2.19653
CIT	19.0404	8.15972	1.1447	0.536875
CITED2	541.341	1188.01	-1.21093	-0.467525
CITED4	31.8503	21.1437	0.585454	0.220713
CIZ1	199.512	60.6091	1.71625	3.87046
CKAP2	25.9009	23.2107	0.126202	0.0373422
CKAP2L	6.77383	22.2336	-1.72319	-1.16652
CKAP4	389.844	378.642	0.0178683	0.00752752
CKAP5	22.1511	7.91634	1.41495	0.706985
CKB	328.409	1222.16	-1.86696	-1.40371
CKLF	66.6188	14.1014	2.26751	4.17312
CKS2	293.917	202.698	0.531066	0.299267
CLASP1	30.6527	21.1846	0.494468	0.338727
CLASP2	9.11866	24.8736	-1.46627	-1.17085
CLASRP	45.3955	38.1249	0.254811	0.164665
CLCC1	20.6125	6.35297	1.63217	1.37114
CLCF1	30.6632	37.6035	-0.297276	-0.134823
CLCN2	6.60609	23.7046	-1.84664	-2.34316
CLCN3	28.8811	33.8354	-0.224457	-0.0641674
CLCN4	4.38391	39.1704	-3.16885	-6.5019
CLCN6	16.0891	18.6441	-0.239608	-0.110869
CLCN7	45.216	63.9792	-0.500582	-0.315292
CLDN1	13.3265	53.3412	-2.05394	-0.768067
CLDN11	982.558	1848.49	-1.01237	-0.124614
CLDN12	13.4018	71.5312	-2.40365	-1.64431
CLDN19	0.212691	10.5288	-5.38314	-1.73023
CLDN2	3.65029	11.2625	-1.65715	-0.744442
CLDND1	23.6889	79.1537	-1.77991	-1.53824
CLEC16A	40.5394	32.2792	0.305613	0.216949
CLEC3B	12.089	2.83539	2.20176	0.703863
CLIC1	735.706	754.475	-0.0579914	-0.0361487
CLIC4	196.871	403.372	-1.09137	-0.792473
CLINT1	41.6617	110.7	-1.45799	-1.15148
CLIP1	12.3943	6.69585	0.891062	0.556068
CLIP2	66.3906	35.3819	0.885993	1.05914
CLIP3	121.563	272.483	-1.16545	-1.42187
CLK1	18.6661	24.147	-0.366841	-0.184198
CLK2	38.6077	28.2988	0.442691	0.344425
CLK3	38.7088	9.21234	2.0468	2.88161
CLK4	12.5049	21.9938	-0.818553	-0.620945
CLMP	18.8394	23.6158	-0.387801	-0.0587587
CLN6	103.974	121.119	-0.239226	-0.158879
CLNS1A	52.0253	43.8126	0.222128	0.11565
CLOCK	7.25519	12.634	-0.811	-0.498047
CLPB	47.1413	27.8013	0.759443	0.320945
CLPP	201.457	169.199	0.246481	0.212379
CLPTM1	139.352	286.177	-1.04914	-1.42396
CLPTM1L	62.6462	226.596	-1.8677	-3.58942
CLPX	11.3909	17.0088	-0.586542	-0.314468
CLSPN	11.6959	3.29818	1.70977	0.617191
CLSTN1	490.123	494.236	-0.0117272	-0.00750865
CLSTN3	27.325	0	7.81586	4.54084
CLTA	936.346	1116.13	-0.28509	-0.218045
CLTB	201.188	623.348	-1.61866	-3.23314
CLTC	176.217	148.265	0.234746	0.173878
CLU	1324.4	1344.59	0.0678658	0.0153886
CLUH	87.4687	69.7556	0.325836	0.171579
CLYBL	5.67934	15.2224	-1.44979	-1.05444
CMAS	13.5811	25.8507	-0.950261	-0.58458
CMBL	51.7411	5.25239	3.1672	3.33132
CMC1	58.4591	72.1185	-0.302352	-0.136684
CMC2	79.5465	80.2435	-0.0289131	-0.0135651
CMC4	66.2816	19.3814	1.80189	2.40339
CMIP	96.372	104.161	-0.121719	-0.0587977
CMPK1	52.192	133.382	-1.3676	-2.81106
CMSS1	26.872	14.979	0.806896	0.434947
CMTM3	184.487	205.554	-0.20841	-0.0603405
CMTM6	32.1356	52.953	-0.736011	-0.82982
CMTM7	64.8835	216.268	-1.76776	-1.41076
CMTM8	17.4219	5.42382	1.61367	0.865673
CMTR1	62.2891	50.1451	0.305583	0.270814
CNBP	126.022	109.324	0.185242	0.112776
CNDP2	117.986	36.8218	1.64943	2.74713
CNEP1R1	10.2429	10.7517	-0.0901792	-0.0318522
CNIH1	122.58	302.313	-1.30953	-2.85775
CNIH2	19.677	33.9048	-0.846944	-0.262681
CNIH3	14.9681	1.95421	2.66658	1.72284
CNIH4	92.4386	105.066	-0.175576	-0.0901592
CNN1	25.4925	156.584	-2.54111	-1.02274
CNN2	1871.02	670.911	1.45383	1.99397
CNN3	810.483	581.577	0.512749	0.273488
CNNM2	12.857	29.5157	-1.2149	-0.920765
CNNM3	14.4196	18.4726	-0.370302	-0.152002
CNNM4	17.9949	8.72557	1.11014	0.700424
CNOT1	36.6729	8.40667	2.15073	3.67595
CNOT10	14.4635	29.0014	-1.02146	-0.59702
CNOT11	63.9402	66.4957	-0.0646779	-0.0410042
CNOT2	19.2371	14.5642	0.377006	0.161964
CNOT3	81.3409	40.47	1.01055	1.32206
CNOT4	29.7571	21.9938	0.425888	0.257768
CNOT6	22.9645	20.3549	0.147621	0.0765323
CNOT7	19.964	50.0421	-1.33682	-1.59817
CNOT8	16.0769	27.2702	-0.781466	-0.686068
CNOT9	130.974	61.2805	1.07651	1.03535
CNP	238.565	304.519	-0.306557	-0.124614
CNPPD1	51.1457	118.156	-1.21365	-1.50583
CNPY3	70.0492	136.684	-0.974376	-1.37528
CNPY4	44.4354	7.47753	2.53982	4.23251
CNR1	14.3435	2.12565	2.62277	1.53424
CNRIP1	73.064	32.0873	1.17787	1.40953
CNTF	0	53.9362	-9.72547	-1.18169
CNTLN	13.9475	6.0856	1.24798	0.717744
CNTNAP2	7.18847	29.656	-2.01705	-0.661544
CNTROB	26.0299	20.1319	0.337689	0.141719
COA3	97.366	187.576	-0.954412	-1.88386
COA4	181.801	26.9548	2.76181	11.6598
COA5	61.2732	51.8008	0.2229	0.137899
COA6	41.6687	152.91	-1.87842	-3.8885
COA7	14.2407	10.7277	0.398824	0.183548
COASY	103.036	120.223	-0.23477	-0.197574
COBLL1	2.71572	26.9752	-3.33278	-3.38322
COG1	49.3465	61.3464	-0.333454	-0.179301
COG2	11.3658	25.244	-1.1629	-0.792605
COG3	18.1994	15.3219	0.24009	0.124574
COG4	48.0229	32.6975	0.546692	0.468803
COG5	22.4718	5.57128	1.95716	2.20865
COG6	11.3423	24.2598	-1.09399	-0.521827
COG7	22.436	25.22	-0.169525	-0.0773645
COIL	6.0663	14.1218	-1.24706	-0.642429
COL11A1	69.5276	84.1448	-0.249494	-0.101608
COL12A1	102.078	225.414	-1.16298	-1.08953
COL13A1	72.2474	0	9.17586	5.68153
COL14A1	23.1769	0.195421	6.2893	2.70258
COL16A1	34.3655	130.713	-1.98591	-0.840996
COL18A1	258.141	514.539	-1.03579	-0.684473
COL1A1	7873.43	3277.11	1.22579	0.641859
COL1A2	3060.9	1768.16	0.775014	0.569377
COL23A1	1.8745	128.982	-6.19703	-3.45786
COL26A1	7.35592	39.397	-2.45513	-1.55013
COL27A1	25.5903	1.31998	4.72529	4.36171
COL2A1	1.69385	11.0671	-2.72908	-1.32611
COL3A1	98.8932	1055.08	-3.45931	-0.676257
COL4A1	216.474	1689.9	-3.01633	-3.36065
COL4A2	272.802	708.368	-1.41861	-0.930739
COL4A4	1.30095	17.0016	-3.68265	-1.14338
COL4A5	20.2728	96.3951	-2.25223	-4.04626
COL4A6	9.30296	43.5585	-2.20789	-1.43471
COL5A1	305.293	207.872	0.517867	0.183362
COL5A2	287.472	510.231	-0.80888	-0.673135
COL5A3	2.2026	39.0878	-4.13046	-1.91125
COL6A1	2025.01	933.981	1.06737	0.462255
COL6A2	2543.39	749.643	1.71309	0.788502
COL6A3	395.646	5.45138	6.31952	10.2306
COL7A1	21.288	10.1451	1.04941	0.304166
COL8A1	257.097	80.6129	1.72571	0.678554
COL8A2	19.7914	72.4073	-1.88879	-0.569981
COL9A2	195.894	23.4444	3.05285	1.07134
COL9A3	3.35523	22.8678	-2.78016	-2.05754
COLEC12	151.203	23.1015	2.68172	1.47374
COLGALT1	146.707	127.564	0.199929	0.135149
COMMD10	10.593	37.2606	-1.82655	-1.77973
COMMD2	24.8697	13.6591	0.822111	0.492325
COMMD3	82.5545	134.49	-0.72618	-0.773445
COMMD4	55.4993	63.3378	-0.200569	-0.105584
COMMD5	41.844	104.748	-1.33724	-1.68143
COMMD6	359.722	43.4697	3.04418	8.28613
COMMD7	90.2256	54.0811	0.737718	0.914083
COMMD8	12.9978	18.4487	-0.52372	-0.206316
COMMD9	138.208	6.6239	4.53441	10.4384
COMT	276.802	123.079	1.18699	1.26568
COMTD1	24.5215	46.0209	-0.916727	-0.56738
COPA	82.0623	84.8892	-0.0743484	-0.0343406
COPB1	54.0007	39.7363	0.440152	0.319328
COPB2	41.3445	45.9107	-0.173226	-0.0691625
COPE	382.964	211.275	0.844826	1.05814
COPG1	196.176	107.342	0.882225	0.842539
COPG2	24.4522	20.2554	0.235758	0.0938711
COPRS	113.019	53.2683	1.07944	1.38269
COPS2	14.6772	8.96895	0.715168	0.339352
COPS3	22.8013	45.5714	-1.01624	-0.937804
COPS4	18.5861	27.5411	-0.587539	-0.314834
COPS5	23.6289	33.5956	-0.525999	-0.214625
COPS6	48.8387	65.189	-0.418938	-0.245894
COPS7A	113.479	141.275	-0.322825	-0.275933
COPS7B	57.7317	32.2036	0.813811	0.747363
COPS8	53.3376	67.1947	-0.345382	-0.222751
COPS9	256.008	537.183	-1.07945	-2.6321
COPZ1	496.554	347.491	0.501566	0.822393
COPZ2	71.792	249.401	-1.82098	-1.84053
COQ10A	17.4411	0	7.1477	4.25431
COQ10B	13.6892	22.9433	-0.771546	-0.495194
COQ2	73.5792	49.8946	0.536507	0.36941
COQ4	137.646	93.3714	0.560811	0.488583
COQ5	44.7946	30.4688	0.545374	0.327074
COQ6	25.3845	34.3329	-0.44663	-0.290147
COQ7	28.8182	64.4313	-1.16586	-1.20885
COQ9	66.5697	188.649	-1.50857	-3.64324
CORO1A	21.1643	4.39876	2.27805	2.55143
CORO1B	169.959	395.088	-1.24917	-1.23589
CORO1C	186.233	99.3157	0.910435	0.556068
CORO2B	192.705	51.4952	1.94203	0.921046
COTL1	1162.17	768.642	0.588148	0.665086
COX10	9.37894	32.3547	-1.7936	-2.47938
COX11	19.8614	5.59526	1.74194	1.17604
COX14	53.9608	287.047	-2.42522	-9.85656
COX15	34.8717	28.0518	0.287593	0.177409
COX16	134	115.719	0.178567	0.0904634
COX18	44.5402	94.7501	-1.10742	-1.47189
COX19	32.5267	66.2176	-1.03047	-1.05615
COX20	92.4729	141.861	-0.627893	-0.666173
COX4I1	694.767	1737.19	-1.33369	-2.75588
COX4I2	0	11.6293	-7.56739	-3.55719
COX5A	589.369	984.469	-0.748276	-0.885025
COX6A1	329.06	3969.24	-3.5729	-5.70763
COX6B1	649.738	808.969	-0.317515	-0.34865
COX6B2	0.573124	312.379	-8.92198	-21.4805
COX6C	481.026	1150.84	-1.27374	-3.67301
COX7A1	0.817427	52.8152	-6.02781	-4.95049
COX7A2	155.229	280.968	-0.8451	-0.815049
COX7A2L	153.468	18.8875	3.01821	5.04065
COX7C	738.577	1307.11	-0.82556	-1.35451
CP	3.33696	53.0463	-4.07025	-1.73585
CPA4	126.799	3.51758	5.09217	3.20592
CPD	35.3077	48.6226	-0.47044	-0.292449
CPE	75.9662	446.212	-2.55992	-3.73449
CPEB2	42.6949	51.8151	-0.292091	-0.127489
CPEB4	19.6651	2.49251	2.95599	3.06907
CPED1	1.47421	47.8899	-5.06789	-2.7494
CPLX3	0.244734	20.5192	-6.52281	-2.19642
CPNE1	200.178	41.4951	2.26777	7.69141
CPNE2	45.7382	81.8273	-0.842901	-0.659595
CPNE3	24.1818	21.8667	0.114094	0.0369149
CPNE7	11.4466	3.22623	1.86999	0.622678
CPNE8	4.12814	39.2495	-3.23907	-4.16733
CPOX	26.0863	39.9557	-0.618955	-0.602147
CPPED1	22.0408	63.5225	-1.51417	-1.18867
CPQ	31.8627	25.3195	0.341303	0.12949
CPSF1	85.0185	51.0671	0.727971	0.639929
CPSF2	18.0293	37.4116	-1.06944	-1.22974
CPSF3	20.6387	34.912	-0.765618	-0.342595
CPSF3L	201.524	40.3873	2.31439	3.74615
CPSF4	21.5451	16.8613	0.344207	0.190151
CPSF6	82.4637	45.9622	0.821586	0.917043
CPSF7	83.1386	30.006	1.4357	2.21721
CPT1A	33.4901	43.6855	-0.347512	-0.112776
CPT1C	30.3647	69.1943	-1.23809	-0.826837
CPT2	53.4479	95.9119	-0.857192	-1.31826
CPTP	73.3197	30.3489	1.26105	1.65573
CPXM1	136.834	79.0587	0.710147	0.194214
CPXM2	1.90016	10.1619	-2.40175	-0.564648
CPZ	17.3972	54.5413	-1.71132	-0.213404
CRABP1	23.1515	662.165	-4.83106	-1.34396
CRABP2	14.2487	170.663	-3.66937	-1.84479
CRACR2B	28.2628	9.60675	1.53678	0.500131
CRADD	13.2622	17.1322	-0.358541	-0.162887
CRAMP1	17.7233	5.91416	1.63043	1.51564
CRAT	105.362	160.257	-0.583202	-0.381084
CRB2	8.06897	78.9261	-3.19469	-0.885646
CRCP	65.5636	12.4626	2.37798	5.46875
CREB1	52.6016	22.8474	1.17171	1.30649
CREB3	82.7052	81.7589	0.0142705	0.00775124
CREB3L1	110.57	129.852	-0.285139	-0.0773724
CREB3L2	96.2978	60.4652	0.657137	0.462088
CREB3L4	23.4883	2.93131	2.78625	2.08549
CREB5	24.1668	4.15537	2.71137	2.30183
CREBBP	64.8709	1.90625	5.21081	9.55945
CREBL2	20.7718	5.2284	1.86589	1.49564
CREBZF	40.7864	43.2778	-0.09801	-0.0487295
CREG1	24.7917	79.5552	-1.71197	-1.65372
CRELD1	33.562	198.228	-2.55935	-5.18025
CRELD2	45.5021	28.9774	0.652538	0.347601
CREM	16.5596	18.1333	-0.121076	-0.0567948
CRIM1	72.5737	38.5326	0.923849	0.48254
CRIP2	134.198	564.755	-2.00015	-1.26365
CRIPT	37.7718	84.7178	-1.20115	-0.748795
CRISPLD1	24.2821	0.390842	5.48533	3.52656
CRISPLD2	601.477	24.3592	4.61764	9.5201
CRK	34.7933	36.5065	-0.0921176	-0.0523127
CRKL	79.1081	39.7771	0.980511	0.867874
CRLF1	4.99009	286.247	-5.90476	-13.5117
CRLF3	10.322	7.52549	0.396345	0.142895
CRLS1	85.9851	38.2928	1.15901	2.16627
CRMP1	89.0239	30.9556	1.5602	0.608097
CROCC	1.21671	11.8043	-3.22681	-2.46566
CROT	4.61675	16.323	-1.83676	-1.73935
CRTAP	284.359	298.94	-0.117828	-0.038031
CRTC1	11.2157	17.818	-0.665356	-0.282515
CRTC2	55.0345	77.1897	-0.529955	-0.249147
CRTC3	42.2517	58.1885	-0.465983	-0.335835
CRY1	13.9722	27.1263	-0.962475	-0.720815
CRY2	12.5679	41.3991	-1.73583	-2.18857
CRYAB	25.9586	2616.46	-6.63005	-10.2873
CRYGS	0.180217	21.181	-6.68714	-4.15481
CRYL1	16.0655	55.9261	-1.83653	-1.17106
CRYM	0.360433	130.078	-8.34907	-5.60564
CRYZ	10.7622	19.7686	-0.897999	-0.48846
CRYZL1	11.3088	19.3778	-0.795708	-0.467621
CSAD	28.6611	0.586263	5.15906	4.83105
CSDC2	28.609	128.559	-2.19895	-2.7791
CSDE1	170.601	86.6312	0.945967	0.993271
CSE1L	29.5913	11.4099	1.33009	0.722909
CSF1	64.1358	292.804	-2.20626	-4.32565
CSGALNACT2	11.1905	7.64897	0.549265	0.255793
CSK	180.554	200.156	-0.166222	-0.106721
CSMD1	0.070897	11.8008	-6.66219	-3.43815
CSMD2	17.7806	3.27419	2.34719	1.76529
CSNK1A1	63.1651	280.655	-2.1519	-5.45123
CSNK1D	168.356	196.936	-0.233013	-0.227385
CSNK1E	70.8327	33.8941	1.05683	1.6227
CSNK1G1	18.1354	9.18836	0.97763	0.78846
CSNK1G2	149.846	192.065	-0.372479	-0.324681
CSNK1G3	23.8193	30.0096	-0.3342	-0.223494
CSNK2A2	119.728	86.7786	0.462181	0.402353
CSNK2B	542.006	302.187	0.83785	1.65541
CSPG4	80.6249	67.5315	0.236099	0.0830129
CSRNP1	10.4173	0.390842	4.3395	1.85068
CSRNP2	19.4742	10.9951	0.765881	0.483933
CSRP1	751.068	669.247	0.16034	0.0740573
CSRP2	63.5715	158.299	-1.37553	-0.82385
CST3	955.658	4779.14	-2.29847	-4.73065
CSTB	588.658	521.042	0.144309	0.0602261
CSTF1	21.0712	33.6471	-0.699842	-0.386752
CSTF2	15.843	22.6724	-0.540191	-0.196433
CSTF2T	49.5974	53.2203	-0.120232	-0.0608913
CSTF3	43.7939	15.075	1.48713	0.975066
CTB-50L17.10	82.1969	160.937	-0.973785	-1.67679
CTBP1	257.953	259.989	-0.0130679	-0.00775124
CTBP2	53.5996	56.8338	-0.0963246	-0.049776
CTBS	29.1927	27.1982	0.0950696	0.0474198
CTC1	16.1161	56.5461	-1.82851	-3.23679
CTCF	52.1032	32.8414	0.641664	0.629396
CTDNEP1	282.152	214.909	0.365681	0.206316
CTDP1	39.4665	15.3219	1.35558	2.00607
CTDSP1	106.965	273.229	-1.37541	-1.20599
CTDSP2	286.964	250.096	0.184213	0.0871028
CTDSPL	13.9171	37.5458	-1.46396	-0.77101
CTDSPL2	22.0736	11.6809	0.905324	0.680681
CTF1	17.7008	18.74	-0.103368	-0.0352797
CTGF	1196.76	2395.44	-1.01614	-0.733754
CTH	16.6025	13.4121	0.299313	0.0744195
CTHRC1	58.4565	24.0546	1.24051	0.45507
CTIF	53.0303	36.1911	0.545507	0.487854
CTNNA1	170.446	68.806	1.28879	1.50583
CTNNA2	1.58497	23.7934	-3.87899	-1.40083
CTNNAL1	50.5113	24.1123	1.05655	0.464749
CTNNB1	260.41	280.01	-0.117229	-0.0494361
CTNNBIP1	69.3382	95.6302	-0.459838	-0.252415
CTNNBL1	30.4332	28.8335	0.0492409	0.0186142
CTNND2	21.2115	8.20768	1.39577	0.350599
CTNS	26.1689	38.1285	-0.551036	-0.279883
CTPS1	60.7425	111.682	-0.874665	-0.683003
CTPS2	11.2223	21.308	-0.938214	-0.726991
CTR9	19.2699	28.6141	-0.587651	-0.353572
CTSA	327.551	597.525	-0.907099	-0.686068
CTSB	781.521	771.455	0.0128986	0.00833939
CTSC	411.779	14.8556	4.72968	13.3842
CTSF	90.3953	121.915	-0.454551	-0.222799
CTSH	23.2503	94.7991	-2.06799	-0.907899
CTSK	0.315631	25.3027	-6.44373	-1.96789
CTSO	7.76553	12.5825	-0.729286	-0.286168
CTSV	3.34319	290.64	-6.41436	-15.0533
CTSZ	123.594	202.84	-0.728128	-0.885025
CTTN	140.889	69.0698	1.03603	0.810685
CTTNBP2NL	13.1577	9.84656	0.365204	0.147531
CTU1	20.8436	7.42957	1.53627	1.18717
CTU2	29.86	37.4632	-0.32537	-0.160635
CTXN1	136.061	209.867	-0.600687	-0.323309
CTXN3	0	10.1379	-7.34809	-2.41137
CUEDC1	31.7238	39.9557	-0.337591	-0.167086
CUEDC2	133.273	163.124	-0.298414	-0.214625
CUL1	26.3452	21.9458	0.255539	0.112899
CUL2	15.7784	19.0109	-0.286447	-0.110772
CUL3	29.8293	38.9546	-0.387236	-0.294767
CUL4A	35.0789	26.0701	0.414965	0.185343
CUL4B	61.5956	20.6463	1.54288	1.22526
CUL5	15.2015	20.9208	-0.45033	-0.237065
CUL7	75.2205	143.178	-0.957568	-0.713366
CUL9	12.5735	14.4168	-0.226189	-0.101028
CUTA	582.074	371.736	0.616283	0.505196
CUTC	15.4214	4.76562	1.74983	1.42914
CUX1	89.7887	98.6274	-0.14428	-0.0639942
CWC15	32.2302	34.7477	-0.145877	-0.0491618
CWC27	12.364	3.07877	1.92579	1.28248
CWF19L1	20.1714	9.84656	0.975104	0.434862
CX3CL1	8.80984	130.88	-3.92736	-3.96124
CXCL12	68.2529	1659.53	-4.64549	-1.29626
CXCL14	29.4337	127.857	-2.10434	-0.734879
CXCL16	1.90568	15.2296	-3.05859	-1.36116
CXCR4	11.5297	24.2082	-1.01127	-0.154813
CXXC1	62.8086	56.2547	0.149105	0.107298
CXXC5	208.428	174.792	0.245327	0.112776
CXorf38	15.6259	11.0706	0.517343	0.289987
CXorf56	30.1437	1.31998	4.95879	4.64973
CYB561	15.2964	18.9114	-0.330992	-0.12551
CYB561A3	59.8682	35.9513	0.727605	0.468845
CYB5A	31.933	320.611	-3.3222	-10.4752
CYB5B	195.327	130.889	0.561892	0.288291
CYB5D2	54.0493	24.5103	1.13016	1.41219
CYB5R1	50.0723	40.0036	0.322026	0.213527
CYB5R3	424.286	526.592	-0.283816	-0.135436
CYB5R4	7.18689	21.6234	-1.60185	-1.05914
CYBA	226.219	271.645	-0.303633	-0.140542
CYBRD1	71.3236	147.824	-1.00994	-0.462666
CYC1	149.079	273.668	-0.862908	-0.915889
CYFIP2	22.457	49.5997	-1.14567	-0.949313
CYGB	41.4363	3.95995	3.41808	1.72408
CYHR1	58.2996	121.369	-1.06298	-0.715612
CYP1B1	29.6826	80.44	-1.4538	-0.79972
CYP20A1	23.372	33.0129	-0.517938	-0.430665
CYP26B1	1.24919	837.457	-9.48533	-3.74473
CYP27A1	19.0916	3.00683	2.86584	1.59788
CYP2U1	15.9288	16.323	-0.0622793	-0.0275318
CYP46A1	1.19757	18.4726	-4.06577	-4.04614
CYP4V2	5.49812	51.4855	-3.21316	-6.51172
CYP51A1	79.105	68.1239	0.189021	0.0814391
CYP7B1	3.99187	12.3187	-1.60665	-0.869566
CYR61	1329	1955	-0.547177	-0.400373
CYSTM1	95.4077	354.544	-1.84091	-1.40399
CYTH1	12.082	20.259	-0.750185	-0.437092
CYTH2	128.052	129.889	-0.025082	-0.0135556
CYTH3	29.7436	29.18	0.0254493	0.00985982
CYTL1	16.9655	0	7.11002	4.07599
D2HGDH	14.1756	30.253	-1.10729	-1.17604
DAAM1	14.4215	32.0766	-1.15624	-0.444713
DAAM2	18.8256	121.926	-2.64246	-1.66876
DAB2	87.8746	150.67	-0.831366	-0.38096
DAB2IP	20.3057	61.8944	-1.61859	-2.31036
DACT1	8.79679	10.3129	-0.233344	-0.0758837
DACT3	4.34693	35.9753	-3.07337	-4.00652
DAD1	528.362	647.618	-0.308303	-0.372369
DAG1	164.12	510.765	-1.65628	-2.18416
DAGLA	6.47705	19.4054	-1.57221	-1.33047
DAGLB	769.678	34.2441	4.48471	10.1765
[truncated: 7,594 more rows]

## Sheet: TableS2b
Differential gene expression analysis, mouse vs human, CD19+ B Cells
gene	tpm, human, CD19+ B Cells	tpm, mouse, CD19+ B Cells	log2(foldchange)	-log10(pvalue)*sign
A1BG	20.9548	0	8.60181	3.65035
AAAS	30.8317	68.1491	-0.975893	-1.21928
AACS	3.93679	59.8382	-3.83768	-5.13681
AAED1	74.3581	60.8355	0.472524	0.527062
AAGAB	62.8355	36.5678	0.96065	1.36696
AAK1	6.02532	52.8571	-2.92767	-3.79319
AAMDC	2.33722	12.3001	-2.26581	-0.938574
AAMP	48.5433	185.499	-1.7674	-5.23642
AAR2	32.712	41.8868	-0.177122	-0.109728
AARS	26.8816	67.4842	-1.14798	-1.51037
AARS2	26.5482	11.3028	1.41493	1.43859
AARSD1	30.832	31.5813	0.135301	0.0782532
AASDH	26.6458	33.2435	-0.133166	-0.0712648
AASDHPPT	36.577	61.168	-0.578469	-0.549937
ABAT	18.6571	0	8.41723	3.47393
ABCA1	91.1694	146.936	-0.525065	-0.67249
ABCA2	10.393	15.292	-0.396207	-0.159909
ABCA3	2.22603	43.2165	-4.12598	-4.55138
ABCA5	23.4555	2.32704	3.48682	3.88803
ABCA7	97.6442	43.5489	1.33691	3.17858
ABCB10	15.7063	20.6109	-0.242845	-0.102414
ABCB4	73.2348	5.31895	3.94536	10.1093
ABCB7	68.0922	75.1302	0.0305155	0.02135
ABCB8	29.8595	13.6298	1.30975	1.41315
ABCC1	50.966	66.8194	-0.217273	-0.166362
ABCC10	14.6943	8.97574	0.904196	0.496536
ABCC4	18.7152	20.9434	0.0270953	0.010675
ABCC5	10.5039	18.9488	-0.697785	-0.342366
ABCD1	26.5873	56.5139	-0.921858	-0.899885
ABCD3	21.0926	13.9623	0.763279	0.516084
ABCD4	51.9249	9.97304	2.55121	5.70829
ABCE1	66.3533	231.707	-1.63458	-5.02927
ABCF1	218.801	147.933	0.744504	1.67873
ABCF2	21.3016	56.8463	-1.24735	-1.49129
ABCF3	26.4653	112.03	-1.89877	-3.88314
ABCG1	310.239	201.788	0.785256	1.26099
ABHD10	16.8618	33.5759	-0.837215	-0.599285
ABHD11	18.2836	93.7466	-2.16254	-4.05453
ABHD12	25.3358	45.5435	-0.680913	-0.58147
ABHD13	70.1311	49.8652	0.679271	0.747265
ABHD14A	11.9659	8.31087	0.702368	0.325446
ABHD14B	108.605	10.6379	3.51922	13.5657
ABHD15	34.092	1.32974	4.86863	5.64154
ABHD16A	32.6265	42.2192	-0.202215	-0.126932
ABHD17A	8.15307	141.617	-3.94473	-11.8251
ABHD17B	97.9541	238.688	-1.10791	-2.94593
ABHD17C	3.7015	11.9676	-1.49545	-0.587243
ABHD18	38.8611	0.997304	5.45985	6.95027
ABHD2	24.4873	100.063	-1.86639	-3.75259
ABHD3	42.7127	0	9.61426	4.63386
ABHD4	12.717	11.3028	0.340207	0.138013
ABHD5	19.746	12.3001	0.881805	0.554383
ABHD6	9.0163	17.2866	-0.770201	-0.339275
ABHD8	5.8299	13.2974	-1.02015	-0.427225
ABI1	252.909	220.737	0.37166	0.577174
ABI2	26.0723	4.98652	2.54991	3.17297
ABI3	5.09176	136.963	-4.61363	-12.8952
ABL1	17.561	65.4896	-1.70624	-2.08395
ABL2	12.7039	24.6002	-0.770762	-0.452455
ABLIM1	211.936	554.501	-1.21088	-4.91973
ABR	20.5245	13.6298	0.779321	0.486437
ABRACL	36.5375	196.136	-2.24971	-7.86969
ABT1	52.0283	80.7816	-0.444842	-0.390518
ABTB1	65.0845	31.5813	1.20892	2.03681
ABTB2	4.95409	20.9434	-1.85266	-1.04932
AC004381.6	0.41764	13.2974	-4.54447	-1.62122
AC013461.1	13.3295	5.31895	1.50637	0.955986
AC025263.3	1.16869	52.1922	-5.38354	-5.91042
ACAA2	27.3259	44.5462	-0.533284	-0.4263
ACAD11	26.3804	12.6325	1.23588	1.18789
ACAD8	29.6218	2.65948	3.65244	4.94119
ACAD9	29.8144	33.2435	0.000232102	0.000151683
ACADL	0.320012	66.8194	-7.63239	-6.69565
ACADM	19.5627	34.5732	-0.640013	-0.416786
ACADS	4.96782	22.938	-2.00346	-1.29315
ACADSB	23.8207	12.6325	1.09303	0.934442
ACADVL	66.4638	40.8895	0.870036	1.24285
ACAP1	116.183	283.899	-1.10899	-3.16516
ACAP2	205.624	131.312	0.817944	2.00069
ACAP3	10.8101	16.9542	-0.486952	-0.211556
ACAT1	30.8183	80.7816	-1.2177	-1.85372
ACBD3	166.143	129.982	0.529074	0.948274
ACBD4	13.036	29.2542	-1.00544	-0.685926
ACBD5	32.8507	69.8113	-0.914042	-1.052
ACBD6	0.20882	75.4627	-7.80789	-7.1643
ACCS	23.8074	8.6433	1.64495	1.67723
ACD	22.3453	150.26	-2.57504	-7.85811
ACER3	13.4404	16.9542	-0.158786	-0.0631904
ACIN1	308.003	479.703	-0.46622	-0.993361
ACKR3	24.6445	22.2731	0.340065	0.158695
ACLY	23.2918	127.987	-2.27991	-5.95176
ACO1	8.05527	24.9326	-1.47114	-0.979099
ACO2	95.0326	35.2381	1.60998	4.27501
ACOT13	6.27401	47.5382	-2.80573	-3.06337
ACOT8	23.2907	53.1895	-1.01904	-1.02628
ACOX1	17.9193	70.1437	-1.8119	-2.69175
ACOX3	16.6122	125.328	-2.73781	-6.1172
ACP1	112.532	1.32974	6.57498	14.4935
ACP5	67.8066	166.882	-1.11244	-2.11131
ACP6	3.28337	25.5975	-2.79648	-2.04281
ACSF2	20.72	76.1275	-1.68004	-2.31345
ACSF3	29.4277	19.6136	0.762632	0.641099
ACSL1	158.164	36.9002	2.28303	5.41765
ACSL3	119.687	145.606	-0.106038	-0.0976368
ACSL4	53.777	91.4195	-0.587994	-0.724452
ACSL5	47.8885	4.32165	3.6376	7.78221
ACSM3	23.7225	0	8.77282	3.81363
ACSS1	104.061	48.8679	1.26668	3.08815
ACSS2	4.7724	15.292	-1.51678	-0.720756
ACTB	4782.39	9718.73	-0.84691	-3.38884
ACTG1	1647.79	8.31087	7.80941	92.0072
ACTL6A	26.001	73.1356	-1.34286	-1.61894
ACTN1	4.04864	21.9407	-2.31056	-1.08794
ACTN4	61.9183	109.371	-0.63965	-0.861363
ACTR10	78.6657	105.714	-0.257559	-0.244325
ACTR1A	89.9539	147.601	-0.535355	-0.792129
ACTR1B	36.1335	63.495	-0.64216	-0.654829
ACTR2	131.287	315.48	-1.09305	-3.27172
ACTR3	452.001	1107.67	-1.12142	-4.9326
ACTR3B	18.9903	7.31356	1.53349	1.22225
ACTR5	29.9689	72.8032	-1.10996	-1.44172
ACTR6	23.7354	15.6244	0.769297	0.551263
ACTR8	28.6448	47.2057	-0.566791	-0.421308
ACVR1B	3.59031	29.5867	-2.82189	-2.26397
ACYP1	15.9596	39.8922	-1.13146	-0.959761
ACYP2	49.1676	9.30817	2.56609	5.05898
ADAL	10.0594	23.6029	-1.05683	-0.660704
ADAM10	50.047	126.99	-1.16683	-2.00098
ADAM15	14.9164	3.65678	2.21392	1.75836
ADAM17	70.2944	94.4114	-0.245601	-0.223718
ADAM19	343.659	49.8652	2.95614	21.6974
ADAM28	480.185	0	13.1091	8.63946
ADAM8	68.9559	1.32974	5.87033	10.9642
ADAM9	23.7368	49.8652	-0.899588	-0.874293
ADAMTS10	1.05767	42.5516	-5.11838	-4.81927
ADAMTS6	9.53058	26.9272	-1.32654	-0.944895
ADAP1	16.7385	18.6163	0.0217681	0.00841029
ADAP2	10.7004	0	7.63397	2.72016
ADAR	170.441	108.706	0.821917	1.93818
ADARB1	40.1786	2.65948	4.07717	6.65738
ADAT1	23.291	14.2947	0.877617	0.654036
ADAT2	31.2227	21.9407	0.687228	0.57402
ADAT3	54.8183	91.752	-0.575846	-0.655757
ADCK1	10.3927	21.2758	-0.87659	-0.48759
ADCK3	38.6523	263.953	-2.59649	-11.7115
ADCK4	17.1695	34.5732	-0.839335	-0.627339
ADCK5	7.73625	15.6244	-0.840577	-0.374485
ADCY3	4.3412	13.9623	-1.50648	-0.686117
ADCY7	45.1494	107.376	-1.08002	-1.81048
ADD1	154.647	142.947	0.285028	0.365577
ADD2	49.6716	0	9.83976	4.87632
ADD3	260.664	316.478	-0.109259	-0.124152
ADGRE5	160.408	1514.57	-3.06689	-19.5827
ADGRG5	40.5017	0	9.54044	4.55206
ADH5	28.1888	143.279	-2.17714	-5.92646
ADI1	35.6027	62.8301	-0.65475	-0.626694
ADIPOR1	79.9372	109.703	-0.276661	-0.268129
ADIPOR2	38.778	54.1868	-0.307844	-0.22617
ADK	386.361	30.2516	3.84319	31.6489
ADM	3.50624	25.265	-2.70967	-1.78929
ADNP	133.827	90.7547	0.74063	1.37222
ADNP2	43.8428	22.6056	1.13267	1.47609
ADO	16.2932	32.5786	-0.817441	-0.592568
ADORA2A	14.8321	19.9461	-0.253659	-0.112844
ADPGK	194.634	102.722	1.09394	3.08632
ADPRH	27.3977	64.4923	-1.04782	-1.25049
ADPRHL2	31.0987	38.5624	-0.124782	-0.0721916
ADPRM	40.5967	32.5786	0.479461	0.368903
ADRB2	34.1422	178.85	-2.22898	-6.8841
ADSL	19.1014	47.5382	-1.16436	-1.11403
ADSS	143.132	165.885	-0.0366738	-0.0311836
ADSSL1	0.640025	16.2893	-4.52074	-0.546545
AEBP1	28.4536	0.332435	6.59732	4.01745
AEBP2	63.2634	89.4249	-0.33066	-0.327983
AEN	67.7479	42.8841	0.839399	1.21187
AES	741.7	221.734	1.91493	14.0139
AFF1	227.161	394.6	-0.626688	-1.24726
AFF3	764.802	365.013	1.23852	5.61079
AFF4	314.938	253.98	0.485743	1.00642
AFG3L2	102.014	57.5112	0.999467	2.07769
AFMID	8.68223	29.2542	-1.57534	-1.25058
AFTPH	54.417	57.8436	0.0889375	0.0633188
AGA	25.1402	26.9272	0.0606127	0.0289055
AGAP3	18.7838	37.5651	-0.829929	-0.525124
AGBL2	20.2573	0	8.53606	3.5812
AGBL5	9.85059	12.965	-0.225969	-0.0814989
AGFG1	130.441	125.66	0.228897	0.261869
AGFG2	4.77224	14.9596	-1.48851	-0.708311
AGGF1	30.5118	69.8113	-1.02483	-1.32839
AGO1	42.0735	60.1707	-0.348484	-0.290338
AGO2	104.145	73.1356	0.687198	1.12547
AGO3	59.5933	30.2516	1.15626	1.89567
AGO4	16.9205	6.98113	1.46711	1.06936
AGPAT1	26.784	52.8571	-0.803573	-0.804389
AGPAT2	9.7394	12.965	-0.23805	-0.0855505
AGPAT3	15.1651	90.0898	-2.41423	-4.78018
AGPAT4	33.7934	58.8409	-0.636984	-0.514332
AGPAT5	193.788	42.2192	2.37197	12.5381
AGPS	47.1254	79.1194	-0.573422	-0.650642
AGTPBP1	60.2731	40.557	0.743544	0.962294
AGTRAP	12.8285	15.9569	-0.144926	-0.0552921
AHCTF1	45.1494	117.349	-1.20827	-2.24667
AHCYL1	21.3145	95.0763	-1.99872	-3.89534
AHCYL2	23.056	42.8841	-0.70877	-0.582395
AHDC1	12.8015	49.2003	-1.75301	-2.0093
AHI1	48.2676	31.2489	0.806045	0.947511
AHNAK	537.473	135.633	2.16419	15.4586
AHSA1	53.2862	148.598	-1.31313	-2.63776
AHSA2	56.3336	46.8733	0.433707	0.36667
AICDA	0	15.6244	-6.49771	-2.85891
AIF1	14.8328	1.66217	3.33775	2.62715
AIFM1	8.89023	30.9164	-1.62662	-1.18184
AIG1	25.1	35.9029	-0.343089	-0.219787
AIM1	14.4135	3.32435	2.27951	1.73951
AIM2	41.4331	169.209	-1.86364	-5.31241
AIMP1	197.493	106.047	1.07298	3.06635
AIMP2	6.67842	31.5813	-2.07848	-1.8105
AIP	55.892	65.1572	-0.0435828	-0.0298582
AK2	23.0954	171.204	-2.72425	-8.66838
AK3	39.7796	30.584	0.558265	0.476611
AK9	11.1035	0	7.68822	2.81571
AKAP1	24.7802	0.997304	4.80946	4.96127
AKAP10	68.1182	98.7331	-0.367409	-0.374926
AKAP11	33.128	21.2758	0.813748	0.722402
AKAP12	2.22636	15.292	-2.61126	-1.23517
AKAP13	466.803	448.454	0.231841	0.365263
AKAP2	369.991	44.5462	3.22986	23.1574
AKAP6	42.904	0.332435	7.16615	4.75583
AKAP7	23.1204	13.6298	0.91211	0.506395
AKAP8	152.097	194.474	-0.173951	-0.182942
AKAP8L	113.953	183.171	-0.510031	-0.833327
AKAP9	109.807	52.1922	1.24784	3.13824
AKIP1	2.96335	17.619	-2.39877	-1.2454
AKIRIN1	152.891	86.1006	1.01025	2.32023
AKIRIN2	227.923	101.393	1.34532	5.06575
AKNA	111.823	132.974	-0.0764229	-0.0694799
AKR1A1	73.1998	194.474	-1.23609	-3.19771
AKR1B1	30.0407	27.5921	0.306104	0.190556
AKR7A2	40.2123	51.1949	-0.165661	-0.110111
AKT1	36.7329	66.4869	-0.677096	-0.731748
AKT1S1	18.1284	47.8706	-1.23958	-1.3003
AKT2	184.316	76.1275	1.45158	4.9326
AKT3	40.1402	48.8679	-0.111792	-0.072468
AKTIP	9.335	15.292	-0.55973	-0.229898
ALAD	16.6002	22.2731	-0.234018	-0.108072
ALAS1	23.6241	52.1922	-0.977063	-0.975791
ALCAM	48.1125	17.9515	1.59267	2.6837
ALDH16A1	97.2103	48.5355	1.1706	2.10139
ALDH18A1	13.7604	16.6217	-0.0971338	-0.0376619
ALDH3A2	15.5966	53.1895	-1.61228	-1.8686
ALDH4A1	5.91396	26.5948	-1.95986	-1.42106
ALDH5A1	12.9126	0	7.90493	3.00889
ALDH9A1	46.5199	85.7681	-0.73279	-0.673837
ALDOC	10.2818	13.6298	-0.241589	-0.0898309
ALG11	24.2661	26.2623	0.0613243	0.0284401
ALG12	20.4395	16.2893	0.503655	0.293237
ALG14	14.2762	35.5705	-1.12785	-0.932378
ALG2	61.1805	19.6136	1.82118	3.87813
ALG3	27.4101	22.938	0.435091	0.284989
ALG5	50.2016	62.4977	-0.139259	-0.0992582
ALG6	22.1216	12.3001	1.01687	0.701898
ALG8	16.7246	16.9542	0.1596	0.0699586
ALKBH1	17.3506	104.052	-2.3999	-5.25759
ALKBH2	24.6425	10.9703	1.35354	1.27985
ALKBH4	1.26616	20.2785	-3.76976	-2.10739
ALKBH5	203.836	129.65	0.828083	2.132
ALKBH6	9.21089	53.1895	-2.35208	-3.1668
ALKBH7	91.2904	23.9353	2.1099	5.95946
ALKBH8	12.8282	55.5166	-1.95003	-2.56731
ALMS1	46.8449	6.31626	3.05711	6.48449
ALOX5	296.55	0	12.4206	7.76604
ALOX5AP	86.8871	7.646	3.67475	12.865
ALPK1	27.4366	1.66217	4.21361	5.31933
ALPK2	1.58617	11.3028	-2.64034	-1.02499
ALS2	13.4414	19.2812	-0.336346	-0.149392
AMACR	3.06147	12.6325	-1.82846	-0.755912
AMBRA1	95.9666	113.36	-0.0587153	-0.0486603
AMFR	109.243	76.46	0.680016	1.00557
AMIGO3	81.2564	0.332435	8.10837	6.36684
AMMECR1	25.0732	17.9515	0.664358	0.476044
AMMECR1L	0.528833	51.5274	-6.39195	-5.45884
AMN1	48.9578	49.2003	0.154881	0.0950138
AMPD2	29.7351	15.9569	1.08158	1.04193
AMPD3	82.8019	10.6379	3.13789	10.7484
AMZ1	0.320012	21.6083	-6.0037	-3.05588
AMZ2	59.592	97.7358	-0.537995	-0.637444
ANAPC1	42.0639	56.8463	-0.245522	-0.170098
ANAPC10	56.378	61.5004	0.0466842	0.0310704
ANAPC11	26.5045	125.66	-2.08266	-5.06121
ANAPC13	23.7232	40.557	-0.597588	-0.463009
ANAPC15	21.523	35.2381	-0.550238	-0.376264
ANAPC16	191.757	111.698	0.953775	2.53045
ANAPC2	39.7095	67.1518	-0.583374	-0.607067
ANAPC4	23.1803	39.5597	-0.593261	-0.452111
ANAPC5	117.618	106.379	0.309511	0.329965
ANAPC7	29.2051	45.876	-0.471948	-0.363156
ANGEL1	15.3597	9.30817	0.888281	0.492479
ANGEL2	56.6821	90.4222	-0.505287	-0.570682
ANK3	40.1822	0	9.53078	4.53675
ANKAR	44.3022	0	9.6809	4.66968
ANKFY1	21.9532	87.0979	-1.83495	-2.8992
ANKH	31.9873	6.31626	2.51353	3.87774
ANKIB1	20.2166	39.2273	-0.778551	-0.631792
ANKLE2	50.4236	84.7708	-0.574814	-0.65665
ANKMY1	50.7988	0	9.87404	4.89662
ANKMY2	13.3429	19.6136	-0.383152	-0.177824
ANKRA2	82.0899	28.9218	1.67815	4.26557
ANKRD10	280.889	125.66	1.32961	4.49963
ANKRD11	169.936	239.353	-0.312695	-0.41496
ANKRD12	243.323	62.8301	2.12869	11.2491
ANKRD13A	244.479	158.239	0.803226	2.16594
ANKRD13C	82.7895	118.679	-0.339511	-0.366421
ANKRD13D	35.8542	12.6325	1.67104	2.15261
ANKRD16	8.16712	37.5651	-2.04331	-1.98335
ANKRD17	118.976	100.395	0.420664	0.566915
ANKRD27	20.3283	25.5975	-0.154423	-0.0767136
ANKRD28	41.6439	29.5867	0.66694	0.626387
ANKRD33B	106.393	28.2569	2.09863	5.86952
ANKRD37	30.5553	30.2516	0.197969	0.10995
ANKRD39	10.3936	11.3028	0.0483362	0.0144521
ANKRD40	22.9141	43.2165	-0.758056	-0.622851
ANKRD42	79.6741	0.997304	6.4784	10.0664
ANKRD46	25.6997	19.6136	0.574815	0.393036
ANKRD49	61.7188	0.332435	7.70667	5.6466
ANKRD52	34.8394	30.584	0.361474	0.259348
ANKRD54	27.7029	17.619	0.835553	0.652798
ANKS1A	2.95012	12.3001	-1.83079	-0.698075
ANKS3	5.91314	24.2677	-1.87349	-0.276275
ANKZF1	89.9602	30.9164	1.70695	3.97981
ANO10	8.16696	50.1976	-2.4652	-3.12453
ANO6	40.4069	126.99	-1.46707	-3.11002
ANO9	39.572	0	9.51938	4.54191
ANP32B	284.056	85.1033	1.91725	9.99787
ANP32E	93.0162	221.069	-1.06798	-2.67799
ANTXR2	106.19	52.8571	1.18152	2.09088
ANXA1	19.1753	19.9461	0.132585	0.0464747
ANXA11	253.315	110.701	1.37052	5.35315
ANXA2	17.8936	14.9596	0.437933	0.225081
ANXA4	65.0594	6.31626	3.53627	10.1233
ANXA5	124.494	37.2327	1.92535	5.94981
ANXA6	447.987	335.759	0.585579	1.31196
ANXA7	109.454	58.8409	1.06417	2.01273
AOAH	18.1428	0	8.37812	3.41843
AP000275.65	45.8028	16.9542	1.60681	2.05433
AP002884.2	15.0147	106.047	-2.62131	-5.25965
AP1AR	30.0093	17.619	0.928665	0.808522
AP1B1	242.242	176.523	0.634144	1.39412
AP1G1	253.722	133.306	1.10648	3.64944
AP1G2	78.9601	25.9299	1.78211	4.38215
AP1M1	47.7636	133.306	-1.31131	-2.56971
AP1S2	39.5673	44.5462	-0.0113614	-0.00638375
AP1S3	136.257	19.6136	2.98367	10.8064
AP2A1	32.5687	43.8814	-0.273368	-0.171439
AP2A2	43.2594	43.8814	0.163102	0.107817
AP2B1	67.3261	165.885	-1.13391	-2.40407
AP2M1	86.6656	22.938	2.0877	6.11681
AP2S1	45.1487	116.685	-1.20184	-2.27834
AP3B1	147.517	77.4573	1.09531	2.37966
AP3D1	75.0218	84.106	0.00712004	0.00521782
AP3M1	53.9135	55.5166	0.127394	0.0900278
AP3M2	36.1372	18.6163	1.14858	1.21721
AP3S1	52.1499	6.64869	3.14912	6.27811
AP3S2	26.922	28.9218	0.0634037	0.0322918
AP4E1	25.9487	36.9002	-0.335109	-0.216657
AP4M1	4.66088	26.5948	-2.34459	-1.80056
AP4S1	13.4535	28.2569	-0.906229	-0.578511
AP5B1	19.3813	25.5975	-0.229474	-0.115365
AP5M1	48.9265	43.5489	0.361417	0.25682
AP5S1	21.0931	14.6271	0.699012	0.4483
AP5Z1	58.6184	36.2354	0.867014	1.06638
APAF1	16.0002	45.5435	-1.34208	-1.41524
APBA3	18.213	30.2516	-0.556996	-0.358862
APBB1	25.4326	0	8.86549	3.88981
APBB1IP	113.807	358.697	-1.48993	-4.90195
APBB2	25.1977	2.32704	3.61229	4.64915
APBB3	31.6807	61.8328	-0.795462	-0.871445
APC	28.7729	71.4735	-1.13592	-1.28359
APEH	30.3872	100.063	-1.54434	-2.96352
APEX1	158.055	118.014	0.592534	1.07594
APEX2	22.4153	21.2758	0.257817	0.127181
APH1A	85.6006	22.938	2.08135	5.91405
API5	129.105	162.561	-0.157945	-0.167165
APIP	36.9405	60.8355	-0.543723	-0.506557
APITD1	8.37578	18.2839	-0.96264	-0.498979
APLF	12.7166	7.31356	0.965615	0.511945
APLP2	202.598	53.8544	2.0787	8.12148
APMAP	28.0507	30.584	0.054728	0.0283874
APOBEC1	0	110.368	-9.31817	-10.7803
APOBEC3H	1.47498	487.682	-8.05848	-29.4477
APOE	0	634.618	-11.8417	-19.835
APOL6	32.3751	0	9.21099	4.19617
APOLD1	13.1613	6.31626	1.21528	0.680601
APOM	29.9979	0	9.11058	4.12379
APOOL	10.7976	27.9245	-1.18827	-0.841208
APOPT1	22.1493	54.1868	-1.12665	-1.24065
APP	98.3005	2.32704	5.57561	15.7775
APPBP2	40.9882	116.685	-1.33931	-2.57279
APPL1	112.396	82.1114	0.630463	1.01824
APPL2	44.2727	12.965	1.94445	3.4699
APRT	170.387	147.601	0.382338	0.587221
APTX	35.4523	30.584	0.391238	0.285266
AQP9	24.3226	0	8.83081	2.43678
AQR	72.8391	50.8625	0.695261	0.968182
ARAF	104.413	143.279	-0.274603	-0.302815
ARAP1	100.168	247.331	-1.12306	-2.83348
ARAP2	139.915	47.8706	1.72143	6.15502
ARCN1	128.776	157.242	-0.107717	-0.102954
AREL1	37.1762	62.1653	-0.571275	-0.551148
ARF1	438.287	476.379	0.0600602	0.063164
ARF3	44.1485	97.4034	-0.964735	-1.51861
ARF4	252.331	340.081	-0.252666	-0.347048
ARF5	130.244	128.32	0.19491	0.209616
ARF6	184.533	503.306	-1.27591	-5.14402
ARFGAP1	37.3852	71.8059	-0.769962	-0.901504
ARFGAP2	44.9703	50.5301	0.0129642	0.00779572
ARFGAP3	45.3757	12.3001	2.06947	3.61381
ARFGEF1	101.891	169.874	-0.562007	-0.90271
ARFGEF2	167.94	111.033	0.773177	1.73317
ARFIP2	44.0766	43.2165	0.196331	0.134699
ARFRP1	13.8324	86.7654	-2.43664	-3.9891
ARGLU1	797.895	230.045	1.96868	15.1743
ARHGAP1	54.4437	49.2003	0.318915	0.278365
ARHGAP11B	1.15529	23.6029	-4.02411	-2.43569
ARHGAP12	49.9377	45.2111	0.324622	0.267203
ARHGAP15	401.361	355.373	0.348807	0.628397
ARHGAP17	169.325	240.018	-0.331944	-0.45506
ARHGAP18	8.68239	20.2785	-1.04494	-0.587797
ARHGAP21	10.0735	18.6163	-0.719304	-0.348881
ARHGAP24	376.218	114.358	1.90647	1.35258
ARHGAP25	413.913	325.121	0.528729	1.04483
ARHGAP26	31.5427	180.512	-2.33716	-7.78676
ARHGAP27	122.051	94.079	0.551088	0.857381
ARHGAP30	78.6939	339.416	-1.93734	-8.42274
ARHGAP31	73.5223	12.3001	2.75835	7.13887
ARHGAP32	21.7439	0	8.62726	3.59941
ARHGAP35	3.1591	24.2677	-2.68914	-1.74384
ARHGAP4	206.562	409.559	-0.81268	-2.29616
ARHGAP42	23.9262	0	8.75453	3.64792
ARHGAP45	250.628	690.799	-1.28756	-5.92445
ARHGAP5	22.9321	0.332435	6.30073	3.6134
ARHGAP6	6.10938	18.6163	-1.37825	-0.6655
ARHGAP9	123.029	71.141	0.954583	1.7851
ARHGDIA	292.536	432.83	-0.384362	-0.628916
ARHGDIB	1390.98	1718.35	-0.130994	-0.187826
ARHGEF1	284.048	534.222	-0.74298	-1.75408
ARHGEF10	0.20882	23.9353	-6.15126	-3.29825
ARHGEF11	2.22603	32.2462	-3.70231	-3.27094
ARHGEF2	140.796	116.352	0.440084	0.572234
ARHGEF3	72.101	259.299	-1.67033	-6.01311
ARHGEF6	18.6576	74.7978	-1.83997	-3.0102
ARHGEF7	132.18	51.1949	1.54346	4.42663
ARID1A	141.428	210.431	-0.40273	-0.605586
ARID1B	228.282	155.912	0.72488	1.71372
ARID2	54.1771	31.5813	0.944082	1.24291
ARID3A	22.9854	20.9434	0.307822	0.170098
ARID3B	15.0272	82.4438	-2.27198	-4.24087
ARID4A	83.6759	88.0952	0.098642	0.0831348
ARID4B	218.014	167.215	0.558089	1.06746
ARID5A	302.957	511.284	-0.574128	-1.09897
ARID5B	336.878	103.72	1.87393	10.557
ARIH1	439.323	214.753	1.2068	5.2779
ARIH2	207.385	59.8382	1.96914	9.50748
ARL1	29.1201	86.433	-1.3992	-2.15857
ARL10	7.31811	13.6298	-0.739304	-0.303402
ARL13B	21.7053	34.9056	-0.509782	-0.349597
ARL14EP	59.9946	15.292	2.14236	4.80081
ARL15	67.6498	49.8652	0.618179	0.772632
ARL16	25.0029	14.2947	0.979855	0.818121
ARL2BP	40.572	123.333	-1.43161	-3.08119
ARL3	6.77539	11.3028	-0.571271	-0.187551
ARL4A	157.876	52.1922	1.76972	6.55184
ARL4C	161.758	27.2596	2.7525	11.7961
ARL5A	89.2713	40.557	1.31471	2.97968
ARL5B	82.431	138.958	-0.565923	-0.706857
ARL5C	0	167.547	-9.92041	-12.8647
ARL6	13.1474	4.32165	1.76562	1.15742
ARL6IP1	113.95	406.9	-1.64755	-5.08824
ARL6IP4	137.642	52.5247	1.55841	4.73912
ARL6IP5	74.4832	255.975	-1.59773	-5.24088
ARL6IP6	55.3357	96.7385	-0.625921	-0.782271
ARL8A	123.18	145.606	-0.0645516	-0.0574385
ARL8B	147.141	184.834	-0.150069	-0.158351
ARMC1	20.7311	46.5409	-0.988269	-0.838953
ARMC10	22.0391	13.2974	0.900373	0.667627
ARMC2	14.1198	0	7.99753	3.02418
ARMC5	24.8644	11.9676	1.23613	1.14233
ARMC6	11.8107	11.9676	0.12079	0.0370077
ARMC7	6.67858	24.6002	-1.71478	-1.18395
ARMC8	88.3568	74.1329	0.436232	0.491986
ARMCX2	5.20295	31.5813	-2.46825	-2.086
ARMCX3	30.0406	18.6163	0.872793	0.769123
ARMCX5	13.5389	78.1221	-2.33719	-4.11824
ARMCX6	40.7675	5.98382	2.94444	5.74059
ARMT1	14.4147	32.2462	-0.991339	-0.732952
ARNT	30.3298	124.331	-1.87664	-4.23425
ARNTL	41.8392	60.8355	-0.36401	-0.301712
ARPC1A	52.5826	106.712	-0.836558	-1.22844
ARPC1B	163.531	714.735	-1.94954	-11.8811
ARPC2	491.074	553.836	-0.00012552	-0.000151683
ARPC3	721.639	899.236	-0.144413	-0.205793
ARPC4	158.39	346.064	-0.955949	-2.81184
ARPC5L	88.5335	190.153	-0.927087	-2.06053
ARPP19	199.936	190.817	0.249039	0.282889
ARRB1	2.22619	30.9164	-3.63723	-3.10902
ARRB2	73.9506	38.5624	1.11208	2.02328
ARRDC1	33.0488	104.384	-1.45968	-2.28008
ARRDC2	262.939	20.2785	3.88302	18.796
ARRDC3	242.442	286.559	-0.0689496	-0.0696154
ARRDC4	25.6981	0	8.8893	3.84442
ARSA	36.4139	18.2839	1.17574	1.33427
ARSB	27.1307	8.97574	1.76347	2.05482
ARSG	17.2657	17.2866	0.163944	0.0694242
ARSK	7.09573	12.965	-0.698973	-0.276275
ARV1	6.46927	15.6244	-1.11727	-0.527062
AS3MT	0	33.2435	-7.58699	-5.33963
ASAH1	134.546	93.7466	0.697098	1.31329
ASAP1	8.36205	119.676	-3.6583	-9.76075
ASB1	23.0827	11.6352	1.16301	1.00003
ASB13	1.69769	49.5328	-4.72166	-5.07336
ASB6	17.2667	29.2542	-0.58894	-0.377159
ASB7	19.5908	8.31087	1.41406	1.17532
ASB8	46.1099	12.6325	2.04054	3.53258
ASCC1	40.8322	30.584	0.574644	0.455023
ASCC2	61.6243	44.2138	0.655323	0.808902
ASCC3	130.37	96.0736	0.614332	1.07952
ASF1A	12.2995	98.0682	-2.83499	-6.10839
ASF1B	2.86589	15.6244	-2.30709	-1.1567
ASH1L	42.7973	2.32704	4.37134	8.01992
ASH2L	23.7353	43.2165	-0.699626	-0.567196
ASIP	0	216.415	-10.2896	-14.1702
ASNA1	16.7118	57.5112	-1.59094	-1.91799
ASNS	22.8879	2.32704	3.47031	4.11765
ASPHD2	13.5792	0.332435	5.51636	2.6621
ASPSCR1	15.2225	75.1302	-2.10826	-3.45562
ASRGL1	1.0575	47.8706	-5.29188	-5.52297
ASTE1	39.9837	24.2677	0.878467	0.831177
ASTL	0	11.6352	-6.0724	-2.14237
ASUN	15.1781	72.1383	-2.10299	-3.19937
ASXL1	359.483	89.7574	2.1751	14.5486
ASXL2	51.854	88.7601	-0.605536	-0.543991
ATAD1	62.6255	168.212	-1.25289	-2.86158
ATAD2	77.7763	55.5166	0.658052	0.903464
ATAD2B	103.18	70.4761	0.718892	1.07671
ATAT1	13.4144	13.6298	0.17659	0.0671202
ATE1	27.4381	61.8328	-0.99817	-1.15907
ATF1	34.4205	78.787	-1.02693	-1.27495
ATF2	82.1606	108.374	-0.22375	-0.220857
ATF3	205.206	66.1545	1.78913	3.61671
ATF4	587.659	911.203	-0.454647	-0.958206
ATF5	49.0772	6.64869	3.07033	6.49811
ATF6	106.732	157.242	-0.383434	-0.523058
ATF6B	18.3237	29.5867	-0.521296	-0.320996
ATF7IP	459.813	148.931	1.7954	8.44345
ATF7IP2	137.146	0	11.3046	6.42938
ATG10	30.2312	24.6002	0.454062	0.292207
ATG101	14.7213	118.347	-2.82948	-6.95472
ATG12	119.451	53.1895	1.34431	3.57077
ATG13	91.8831	34.9056	1.56595	3.97278
ATG14	92.9975	25.265	2.05241	6.35989
ATG16L1	72.6247	77.4573	0.0712404	0.0522154
ATG16L2	48.5999	84.4384	-0.623047	-0.739805
ATG2A	39.239	90.4222	-1.01695	-1.4631
ATG2B	8.91834	76.7924	-2.96207	-4.88244
ATG3	65.8564	88.4276	-0.244383	-0.205081
ATG4B	58.5456	92.4168	-0.494804	-0.530233
ATG4C	33.3491	12.6325	1.56818	1.6853
ATG4D	56.4213	59.8382	0.0940853	0.0679333
ATG7	57.688	39.5597	0.724184	0.882906
ATG9A	63.1133	15.9569	2.1603	5.24088
ATHL1	117.518	55.5166	1.26039	3.16575
ATIC	64.9354	87.4303	-0.254737	-0.232744
ATL2	97.1223	86.7654	0.345146	0.382647
ATL3	54.4167	119.676	-0.960462	-1.70356
ATM	204.951	72.4708	1.66743	6.01098
ATMIN	14.4989	9.6406	0.77285	0.409413
ATOX1	42.6864	81.1141	-0.754458	-0.95883
ATP10D	49.042	54.8517	0.00320326	0.00186755
ATP11A	58.2853	0.997304	6.04746	8.84468
ATP11B	168.58	199.793	-0.0687438	-0.0694799
ATP11C	31.9868	18.9488	0.926724	0.889295
ATP13A1	49.6838	78.1221	-0.484009	-0.49863
ATP13A2	14.2896	122.004	-2.91257	-7.77513
ATP13A3	59.0926	66.1545	0.0143494	0.00905622
ATP1A1	89.3393	139.955	-0.474831	-0.613413
ATP1B1	3.50575	38.8949	-3.35273	-3.39767
ATP1B3	99.2112	91.752	0.296716	0.248735
ATP2A2	96.7271	108.706	0.00445331	0.00363482
ATP2A3	288.641	270.269	0.270715	0.400232
ATP2B1	420.999	178.185	1.41505	7.0098
ATP2B4	18.2004	0	8.40304	3.44799
ATP2C1	43.8667	73.8005	-0.586171	-0.568578
ATP5A1	130.107	866.99	-2.56287	-19.0788
ATP5B	443.737	918.849	-0.874262	-2.982
ATP5C1	160.37	435.489	-1.26633	-4.73625
ATP5D	277.75	574.447	-0.871281	-2.73609
ATP5F1	127.893	211.428	-0.55299	-0.961509
ATP5G1	7.72202	73.8005	-3.06937	-5.26138
ATP5G2	276.35	32.5786	3.26416	22.7693
ATP5G3	120.769	242.677	-0.832052	-1.10561
ATP5I	105.863	39.5597	1.58715	4.10117
ATP5J	80.6583	430.503	-2.23842	-12.1175
ATP5J2	55.782	160.234	-1.34137	-3.173
ATP5S	28.7301	8.31087	1.95366	2.44482
ATP5SL	19.0618	117.017	-2.44284	-6.09567
ATP6AP1	45.3297	262.623	-2.36283	-9.97047
ATP6AP2	91.0968	204.78	-0.986336	-2.232
ATP6V0A1	57.751	132.974	-1.03996	-1.6159
ATP6V0A2	38.3182	40.8895	0.0826141	0.0501323
ATP6V0B	75.2159	147.933	-0.804571	-1.47043
ATP6V0C	686.999	511.284	0.607328	1.27117
ATP6V0D1	120.939	148.931	-0.123963	-0.119819
ATP6V0E1	85.6486	384.294	-1.99985	-9.06053
ATP6V0E2	26.254	0	8.91634	3.91601
ATP6V1A	39.1669	95.7412	-1.11306	-1.80321
ATP6V1B2	46.2462	108.706	-1.07172	-1.71458
ATP6V1C1	30.5249	83.1087	-1.28117	-1.96334
ATP6V1D	53.6785	121.006	-0.997895	-1.78333
ATP6V1E1	62.069	142.282	-1.02259	-2.0515
ATP6V1E2	11.9785	0	7.77368	2.87646
ATP6V1F	238.518	86.1006	1.64971	6.82912
ATP6V1G1	373.769	99.398	2.08275	12.8974
ATP6V1G2	0.639861	15.292	-4.56459	-1.92664
ATP6V1H	83.2568	130.979	-0.483486	-0.636233
ATP7A	21.0661	50.8625	-1.09062	-1.14982
ATP8A1	204.3	78.4546	1.54986	5.68378
ATP8B2	24.531	36.9002	-0.401826	-0.259692
ATP9B	99.2441	84.106	0.410413	0.512362
ATPAF1	9.0158	15.9569	-0.66167	-0.290906
ATPAF2	46.1379	52.8571	-0.018692	-0.0106143
ATPIF1	195.553	198.796	0.148151	0.155628
ATR	89.5457	48.203	1.06316	2.08941
ATRAID	101.448	64.8248	0.826398	1.42197
ATRN	15.7649	25.5975	-0.51488	-0.291783
ATRX	112.14	118.347	0.0904324	0.0804376
ATXN1	82.7648	32.2462	1.5449	2.86502
ATXN10	87.9868	90.7547	0.123392	0.103807
ATXN1L	42.6867	14.2947	1.75113	2.89773
ATXN2	52.2023	60.5031	-0.0422227	-0.0266544
ATXN2L	248.817	243.675	0.204349	0.272035
ATXN7	59.2437	58.8409	0.180866	0.138188
ATXN7L1	53.0238	89.0925	-0.575197	-0.60318
ATXN7L2	26.0473	30.9164	-0.0677493	-0.0342768
ATXN7L3	55.8796	67.8167	-0.0977945	-0.0702229
ATXN7L3B	135.612	88.0952	0.792339	1.58134
AUH	62.0955	63.8275	0.13082	0.0999366
AUP1	151.491	283.899	-0.732384	-1.67836
AURKA	0.528833	10.3055	-4.07456	-1.32213
AURKAIP1	37.2354	164.888	-1.95872	-5.33281
AURKB	0.528833	16.6217	-4.7627	-2.12691
AUTS2	130.746	0.664869	7.79304	11.2382
AVEN	11.9659	51.8598	-1.93919	-2.47536
AVL9	45.6087	172.534	-1.74211	-4.49711
AXDND1	18.6706	0	8.41395	3.46434
AXIN1	31.3203	66.8194	-0.912139	-1.08321
AXIN2	14.942	0.664869	4.65248	3.09709
AZI2	27.4229	86.1006	-1.47878	-2.35528
AZIN1	632.945	229.047	1.64618	8.00276
B2M	9571.32	8415.58	0.365505	0.64044
B3GALNT2	6.37115	33.5759	-2.26663	-1.82069
B3GALT4	9.10003	13.6298	-0.397691	-0.150486
B3GAT3	70.444	98.7331	-0.314863	-0.327199
B3GLCT	21.039	3.65678	2.71296	2.95662
B3GNT2	87.4221	138.293	-0.482025	-0.662567
B3GNT5	4.46612	212.426	-5.48391	-18.3221
B3GNT7	27.4391	75.4627	-1.2812	-1.61841
B3GNT8	0.320012	49.5328	-7.20051	-5.59418
B3GNTL1	2.7547	18.9488	-2.61949	-1.52605
B4GALNT1	0	253.648	-10.5187	-14.9813
B4GALT1	563.635	128.985	2.30279	17.9104
B4GALT3	45.2639	98.4007	-0.933369	-1.36294
B4GALT4	51.7167	0.664869	6.45368	7.23556
B4GALT5	17.8407	94.7439	-2.19738	-3.22566
B4GALT7	39.1285	27.5921	0.692498	0.614375
B9D2	61.1646	78.787	-0.188367	-0.148837
BACE2	63.5437	0	10.1956	5.2483
BACH1	393.993	56.5139	2.98023	23.4167
BACH2	1090.4	413.549	1.56858	7.33285
BAD	37.066	22.2731	0.909183	0.965971
BAG1	78.2204	112.695	-0.3578	-0.39931
BAG2	25.6431	3.98922	2.85817	3.6867
BAG3	23.0828	5.31895	2.29306	2.65901
BAG4	43.5788	28.9218	0.77268	0.796443
BAG5	85.3632	45.2111	1.09574	1.93001
BAG6	103.561	156.244	-0.417087	-0.580495
BAHD1	19.2703	29.5867	-0.443695	-0.267751
BAIAP2	5.3987	45.876	-2.90458	-3.51035
BAIAP3	55.9784	0.664869	6.57978	7.47859
BAK1	22.7628	57.1788	-1.15238	-1.3691
BAMBI	2.01737	86.7654	-5.31307	-9.3434
BANF1	95.6699	255.975	-1.24698	-3.68333
BANK1	776.467	650.907	0.428661	0.983363
BANP	84.2192	75.1302	0.339969	0.320809
BAP1	43.2869	86.1006	-0.811	-1.08178
BARD1	17.2395	4.32165	2.17864	1.91477
BASP1	238.1	17.619	3.93644	25.3841
BATF	6.6794	33.5759	-2.14811	-1.38384
BAX	43.5361	184.169	-1.90717	-5.89251
BAZ1A	120.906	267.61	-0.976674	-2.56789
BAZ1B	43.1174	119.676	-1.30274	-2.64135
BAZ2A	396.326	533.89	-0.256221	-0.41923
BAZ2B	62.5991	223.064	-1.65144	-4.33182
BBS12	12.6314	2.99191	2.22468	1.38268
BBS2	51.5197	24.2677	1.25181	1.87863
BBS9	11.6585	25.265	-0.956758	-0.574748
BBX	169.773	66.4869	1.52606	5.56588
BCAP29	45.7033	43.5489	0.232195	0.162508
BCAP31	18.1144	121.339	-2.57846	-6.03686
BCAR3	24.9316	459.757	-4.05675	-26.7017
BCAS2	179.002	222.731	-0.13844	-0.155789
BCAS3	47.5394	51.1949	0.0532144	0.0313264
BCAT2	18.3374	50.5301	-1.29843	-1.45048
BCCIP	152.005	277.25	-0.694089	-1.56767
BCDIN3D	9.2243	12.965	-0.328924	-0.119629
BCKDHA	61.4411	43.5489	0.667063	0.815639
BCKDHB	22.3305	17.2866	0.540643	0.300716
BCKDK	23.6381	42.8841	-0.695262	-0.575558
BCL10	61.4332	269.605	-1.94496	-6.7223
BCL11A	579.901	442.803	0.563647	1.29077
BCL2	209.616	81.1141	1.54815	5.92508
BCL2L1	21.1771	10.3055	1.21724	0.997675
BCL2L11	460.538	211.096	1.31147	2.75274
BCL2L12	10.5884	30.584	-1.35355	-1.07642
BCL2L13	38.2909	53.8544	-0.311784	-0.224788
BCL3	217.138	184.834	0.416975	0.453734
BCL6	130.666	93.0817	0.666409	1.19652
BCL7A	127.888	67.4842	1.08958	2.34264
BCL7B	151.732	129.65	0.40441	0.588797
BCL7C	30.902	57.1788	-0.711143	-0.677393
BCL9L	67.5548	0.332435	7.85103	5.91578
BCLAF1	585.964	121.671	2.44305	21.3048
BCOR	25.7538	81.7789	-1.49893	-2.44946
BCORL1	7.81949	10.9703	-0.303889	-0.0932825
BCR	17.7553	34.9056	-0.781029	-0.564999
BCS1L	8.36189	15.6244	-0.727122	-0.318575
BDH1	17.4745	14.9596	0.391409	0.183775
BDH2	12.9397	0	7.89515	2.98009
BDP1	67.662	38.23	0.998282	1.63482
BECN1	165.062	151.923	0.29809	0.385127
BEND3	2.95045	17.2866	-2.30711	-1.13618
BEND4	16.1109	0.997304	4.177	3.31692
BEND5	36.6746	47.2057	-0.1989	-0.130694
BET1	25.2819	38.23	-0.413348	-0.277654
BFAR	100.405	122.336	-0.10378	-0.0920782
BFSP2	0.319848	28.2569	-6.39073	-3.77163
BHLHB9	1.0575	11.3028	-3.21873	-1.23483
BHLHE40	404.734	177.188	1.38282	0.622335
BHLHE41	29.3046	38.23	-0.195763	-0.110321
BICD1	47.9036	4.32165	3.64014	8.00365
BICD2	25.2809	32.911	-0.202828	-0.105244
BID	20.3861	39.8922	-0.768468	-0.566851
BIN3	113.949	70.8086	0.856035	1.46948
BIRC2	238.956	2.65948	6.66586	27.6635
BIRC3	347.284	211.428	0.894519	2.68855
BIRC6	228.227	198.463	0.377132	0.625244
BIRC8	0	112.695	-9.34827	-10.8823
BLCAP	150.692	26.2623	2.68925	12.5124
BLK	422.5	638.939	-0.414834	-0.575088
BLM	22.5811	16.6217	0.608363	0.394007
BLMH	13.775	63.495	-2.0314	-2.85814
BLNK	186.467	682.488	-1.69968	-8.45619
BLOC1S2	112.126	40.2246	1.64752	4.78145
BLOC1S4	32.6707	38.5624	-0.0538563	-0.0286959
BLOC1S6	184.601	46.5409	2.15817	10.1018
BLVRA	10.0735	24.2677	-1.10256	-0.6852
BLVRB	16.1115	166.882	-3.2112	-11.0019
BLZF1	17.2667	26.5948	-0.451394	-0.258555
BMF	43.9279	35.2381	0.500656	0.424695
BMP2K	69.2134	316.478	-2.03286	-5.7764
BMS1	55.1429	81.7789	-0.38563	-0.358862
BMT2	48.8792	102.057	-0.882887	-1.26738
BNIP1	29.8051	20.2785	0.744581	0.588663
BNIP2	186.481	133.971	0.649105	1.17459
BNIP3	3.82527	21.6083	-2.37966	-1.35782
BNIP3L	168.806	125.66	0.605039	1.12547
BOD1L1	141.319	44.2138	1.84838	6.91926
BOLA1	16.9321	29.5867	-0.633324	-0.361348
BOLA3	10.9084	51.1949	-2.05565	-2.63154
BORA	15.5703	28.5894	-0.696603	-0.420841
BORCS5	222.474	21.2758	3.56621	21.045
BORCS6	12.6323	42.5516	-1.60551	-1.57318
BPGM	26.9526	22.2731	0.464548	0.296072
BPHL	13.7737	21.9407	-0.50673	-0.256417
BPNT1	12.5209	43.8814	-1.66052	-1.6881
BPTF	126.625	125.328	0.186464	0.179265
BRAF	212.857	52.8571	2.18776	10.4974
BRAP	119.965	102.722	0.400205	0.544957
BRAT1	11.9391	30.9164	-1.17315	-0.858872
BRCA1	1.27972	10.9703	-3.03722	-1.0379
BRCA2	50.853	8.6433	2.7268	6.1607
BRCC3	12.7031	68.814	-2.26011	-3.64939
BRD1	75.5272	144.277	-0.750041	-1.22873
BRD2	367.03	90.0898	2.19725	13.9426
BRD3	23.7229	33.5759	-0.326534	-0.199609
BRD4	197.659	176.523	0.339168	0.518253
BRD7	108.623	129.982	-0.0862462	-0.0758102
BRD8	9.12667	121.671	-3.59701	-9.39305
BRD9	60.9429	106.379	-0.624193	-0.810821
BRE	130.657	170.539	-0.216799	-0.230993
BRF1	36.8171	69.8113	-0.7393	-0.832697
BRF2	22.3463	14.6271	0.790978	0.539781
BRI3	72.5645	293.54	-1.83012	-6.45213
BRI3BP	19.0478	58.5085	-1.43989	-1.79207
BRIX1	44.2908	126.325	-1.32083	-2.46692
BRK1	105.452	356.038	-1.58197	-5.41514
BRMS1	63.158	79.1194	-0.140422	-0.10648
BRMS1L	12.0771	37.8976	-1.4776	-1.39402
BRPF1	21.5951	84.4384	-1.78463	-3.04847
BRPF3	43.2983	32.911	0.568419	0.504477
BRWD1	67.4404	168.544	-1.14425	-2.68877
BRWD3	21.0395	43.2165	-0.845167	-0.696441
BSCL2	43.1325	64.1599	-0.400564	-0.343209
BSDC1	110.435	77.7897	0.682543	1.16154
BSG	65.0749	296.199	-2.01328	-7.01224
BST2	4.3273	75.4627	-3.89889	-6.21439
BTAF1	259.478	99.0655	1.56521	6.78501
BTBD1	45.1616	43.2165	0.228895	0.162563
BTBD10	18.5191	34.9056	-0.735891	-0.538845
BTBD19	4.24308	20.9434	-2.15792	-1.3136
BTBD2	36.6205	23.9353	0.789186	0.744957
BTBD6	12.5782	5.98382	1.25483	0.665743
BTBD7	29.4417	73.4681	-1.14341	-1.5924
BTBD9	83.3842	71.8059	0.388638	0.436317
BTD	23.7225	16.9542	0.657747	0.458751
BTF3	969.291	499.317	1.13593	4.59909
BTF3L4	23.8336	160.898	-2.58498	-8.22636
BTG1	15527.1	4012.82	2.12581	22.1141
BTG2	1837.73	1114.99	0.898301	3.48778
BTK	196.358	401.249	-0.860038	-2.29616
BTLA	142.976	414.546	-1.375	-3.5681
BTNL2	0	40.2246	-7.86199	-6.09688
BTNL9	18.1458	0.332435	5.96918	3.12434
BTRC	21.1628	39.5597	-0.723266	-0.567196
BUB3	65.7318	126.99	-0.767376	-1.11215
BUD13	46.9309	41.5543	0.349334	0.286167
BUD31	220.65	295.867	-0.252563	-0.347392
BYSL	4.3412	36.5678	-2.89538	-2.91349
BZW1	322.615	319.802	0.193118	0.205925
BZW2	61.1366	87.0979	-0.337648	-0.327056
C10orf128	40.4069	0.664869	6.10497	5.78878
C10orf2	7.48673	22.938	-1.39717	-0.807336
C10orf54	128.795	51.1949	1.51613	3.2567
C10orf76	57.3881	31.2489	1.03621	1.31318
C10orf88	2.72806	18.6163	-2.48588	-1.1558
C11orf1	25.5182	38.23	-0.405604	-0.276543
C11orf24	53.3038	16.9542	1.83039	3.11002
C11orf31	175.128	64.8248	1.60609	5.61407
C11orf49	14.7343	4.98652	1.7321	1.25023
C11orf53	0	30.584	-7.46669	-5.02143
C11orf54	11.5344	0	7.7361	2.8593
C11orf57	27.2994	42.5516	-0.458358	-0.339645
C11orf58	253.766	110.701	1.36886	5.28596
C11orf65	35.8514	0.332435	6.91017	4.43096
C11orf68	10.3932	50.5301	-2.12315	-2.63971
C11orf80	38.7609	0	9.47391	4.44273
C11orf84	4.2166	27.9245	-2.49174	-1.83027
C11orf95	9.6421	15.292	-0.4948	-0.206999
C12orf10	37.3585	55.5166	-0.393172	-0.321118
C12orf29	30.4425	6.31626	2.43707	3.259
C12orf4	22.624	38.8949	-0.598279	-0.405802
C12orf42	121.184	0	11.1228	6.23549
C12orf43	19.6737	50.5301	-1.18129	-1.14303
C12orf45	38.5957	63.1626	-0.543229	-0.499522
C12orf49	56.9518	32.911	0.973519	1.26042
C12orf57	127.035	206.109	-0.519382	-0.858529
C12orf60	23.1495	9.30817	1.46658	1.23382
C12orf65	30.0818	13.9623	1.28289	1.37709
C12orf66	33.8066	22.6056	0.740393	0.543271
C12orf73	14.4991	12.6325	0.384191	0.166947
C12orf75	24.0612	0	8.82258	3.75024
C14orf1	20.649	91.752	-1.97112	-3.5399
C14orf119	18.9902	33.5759	-0.668258	-0.447877
C14orf159	97.5305	12.6325	3.11645	11.571
C14orf166	325.863	240.683	0.613903	1.42162
C14orf169	26.4504	31.5813	-0.074765	-0.0387045
C14orf2	128.173	275.921	-0.931509	-2.4097
C14orf28	23.7389	7.646	1.82619	1.52977
C14orf37	298.982	0	12.4322	7.79629
C14orf80	38.9708	14.6271	1.58417	2.20015
C14orf93	15.9729	8.31087	1.12128	0.696441
C15orf39	99.617	146.936	-0.373773	-0.307808
C15orf40	18.3104	43.5489	-1.07165	-1.01755
C15orf41	9.33582	16.9542	-0.699719	-0.318057
C15orf57	72.2938	32.5786	1.32227	2.30247
C15orf61	25.4611	29.2542	-0.0367991	-0.0165811
C16orf13	43.774	57.8436	-0.218244	-0.150582
C16orf52	8.34914	13.6298	-0.508941	-0.192082
C16orf54	122.452	104.717	0.397355	0.538621
C16orf58	28.6227	11.6352	1.48929	1.47924
C16orf62	20.4254	46.5409	-1.0088	-0.983886
C16orf70	12.2853	63.1626	-2.19201	-3.2467
C16orf72	178.085	201.455	0.000177237	0.000151683
C16orf87	48.852	85.7681	-0.63646	-0.679258
C16orf91	18.8659	55.1842	-1.38512	-1.66522
C17orf107	17.8934	0	8.37134	3.43705
C17orf62	215.757	134.968	0.850057	2.07997
C17orf75	13.1475	5.98382	1.29732	0.765953
C17orf80	2.76826	21.6083	-2.87058	-1.69071
C17orf89	41.4345	66.1545	-0.504369	-0.488007
C18orf21	61.7873	7.97843	3.11951	8.16854
C18orf25	63.2114	58.8409	0.281618	0.249702
C18orf32	119.285	95.4087	0.501051	0.739805
C18orf8	101.887	80.7816	0.505937	0.681214
C19orf12	10.9081	27.9245	-1.1839	-0.853084
C19orf24	58.968	30.2516	1.14228	1.79903
C19orf25	15.569	79.1194	-2.17432	-3.87816
C19orf38	4.45272	240.683	-5.601	-21.6123
C19orf43	407.1	411.554	0.159213	0.221893
C19orf44	3.18607	11.6352	-1.72397	-0.674392
C19orf47	5.38546	14.6271	-1.23105	-0.533834
C19orf52	6.03856	28.5894	-2.07182	-1.67638
C19orf53	154.14	352.713	-1.01576	-3.01343
C19orf54	15.04	27.2596	-0.689257	-0.424888
C19orf60	34.2443	35.5705	0.13566	0.078168
C19orf66	56.532	45.5435	0.489128	0.506386
C19orf70	41.2832	140.62	-1.58758	-3.77912
C1D	12.7032	102.39	-2.8317	-6.55483
C1GALT1	69.4835	104.717	-0.420115	-0.489394
C1GALT1C1	17.7247	49.5328	-1.32957	-1.37582
C1QBP	145.186	148.931	0.134338	0.135669
C1RL	15.4978	0	8.13774	3.19078
C1orf122	16.9466	26.5948	-0.477678	-0.276015
C1orf123	21.2728	48.203	-1.00963	-0.832622
C1orf131	26.2676	25.5975	0.20492	0.107899
C1orf159	8.87748	21.6083	-1.08877	-0.625873
C1orf162	173.327	13.9623	3.81118	19.0588
C1orf174	32.7249	26.9272	0.455687	0.34023
C1orf198	2.115	11.6352	-2.26493	-0.911487
C1orf228	47.4562	0	9.76516	4.74642
C1orf27	35.7159	30.9164	0.378442	0.273554
C1orf35	19.5642	101.06	-2.17574	-4.41374
C1orf43	136.258	21.2758	2.85461	12.3663
C1orf50	11.9661	14.6271	-0.111748	-0.0417156
C1orf52	120.314	57.5112	1.24357	3.1518
C1orf53	0.319848	11.6352	-5.11062	-1.75407
C1orf54	7.9588	53.1895	-2.58243	-2.9959
C20orf194	13.8317	29.2542	-0.878246	-0.562449
C20orf196	17.4881	6.98113	1.48685	1.10194
C20orf27	27.1313	24.2677	0.330946	0.199869
C21orf2	73.8232	12.3001	2.75507	7.87166
C21orf91	35.5915	58.5085	-0.542602	-0.503903
C22orf29	17.9904	14.9596	0.444148	0.229592
C22orf39	80.8072	46.2084	0.97359	1.5723
C2CD2L	10.615	27.9245	-1.24737	-0.865336
C2CD3	53.0955	70.4761	-0.228626	-0.171514
C2CD5	34.1139	29.5867	0.370149	0.239305
C2orf42	106.45	61.168	0.969912	1.92677
C2orf47	68.0934	31.5813	1.28288	2.46203
C2orf49	41.2688	15.9569	1.55044	2.30789
C2orf68	27.3128	55.1842	-0.83698	-0.870835
C2orf69	36.803	13.6298	1.61609	2.18991
C2orf76	14.8321	11.3028	0.566114	0.278598
C2orf81	29.6462	0	9.07516	4.02035
C3orf14	0.848516	35.2381	-5.24898	-4.09265
C3orf38	132.7	40.2246	1.88822	6.02366
C3orf58	40.8643	11.6352	1.9874	3.33419
C4orf3	176.772	58.1761	1.77682	6.51094
C4orf32	30.4979	15.292	1.16741	1.19139
C4orf33	19.1862	22.2731	-0.049404	-0.0212684
C4orf46	26.074	7.97843	1.8791	2.15013
C4orf48	13.8989	0.332435	5.54676	2.70126
C5AR1	10.4084	0.332435	5.15514	1.86653
C5orf15	54.2911	111.033	-0.855297	-1.29473
C5orf22	11.6325	18.2839	-0.463496	-0.209887
C5orf24	69.6805	92.7493	-0.236344	-0.219831
C5orf30	6.13651	153.585	-4.4491	-13.8224
C5orf34	3.81203	112.695	-4.7142	-11.0907
C5orf42	28.9826	22.6056	0.538793	0.375729
C5orf45	47.3992	6.64869	2.99378	5.79136
C5orf51	23.1934	107.709	-2.04429	-4.43279
C5orf63	9.2104	25.9299	-1.32155	-0.877564
C6orf10	0	36.2354	-7.71131	-5.67431
C6orf106	29.0512	46.2084	-0.502172	-0.385065
C6orf120	38.3728	48.203	-0.161468	-0.105186
C6orf136	54.2813	37.2327	0.729552	0.76488
C6orf203	13.7475	4.98652	1.65005	1.11061
C6orf226	41.9623	27.5921	0.773659	0.812219
C6orf47	26.3258	47.2057	-0.655368	-0.541341
C6orf62	332.736	638.607	-0.764366	-2.36819
C6orf89	61.3706	106.379	-0.626966	-0.834137
C7orf26	54.5011	48.8679	0.336867	0.295787
C7orf31	32.88	0.664869	5.81414	5.56367
C7orf43	77.2318	65.4896	0.406911	0.440173
C7orf49	39.5723	12.3001	1.86851	2.94878
C7orf50	122.486	12.3001	3.49508	15.7662
C7orf55	30.4981	29.2542	0.232258	0.138656
C7orf72	0	14.9596	-6.43498	-2.74512
C8orf33	59.7441	67.4842	-0.0044571	-0.00313031
C8orf59	134.171	156.909	-0.0497063	-0.0462362
C9orf114	24.6822	15.292	0.861235	0.677747
C9orf142	44.1486	91.0871	-0.867624	-1.25446
C9orf16	118.645	91.4195	0.554809	0.862116
C9orf3	44.7306	27.5921	0.863773	0.981434
C9orf40	12.0765	44.5462	-1.71603	-1.85093
C9orf64	4.57649	27.9245	-2.50489	-1.71417
C9orf72	69.566	15.292	2.35621	5.79786
C9orf78	189.104	161.896	0.401151	0.637879
C9orf85	14.0809	70.1437	-2.13765	-3.49672
C9orf91	25.7786	13.9623	1.03852	0.785689
CA11	15.6669	0	8.1782	3.26246
CA13	16.4307	8.31087	1.14471	0.736218
CA2	24.0684	27.5921	-0.0383429	-0.0167988
CA5B	66.3085	0.664869	6.80641	8.01531
CAAP1	69.3018	53.522	0.541919	0.639162
CAB39	59.9813	160.234	-1.24661	-2.82104
CAB39L	17.9057	143.944	-2.8432	-7.97382
CABIN1	55.9335	57.5112	0.134775	0.0981446
CABLES1	7.29131	15.6244	-0.903131	-0.409331
CABLES2	11.3385	37.2327	-1.55575	-1.32217
CACFD1	16.2227	53.8544	-1.56917	-1.91758
CACTIN	22.8464	70.1437	-1.43612	-1.92395
CACUL1	128.002	110.036	0.388771	0.527297
CACYBP	48.0023	115.355	-1.09235	-1.88621
CAD	28.3708	56.5139	-0.814326	-0.84349
CAGE1	32.3057	14.2947	1.34327	1.4299
CALCOCO1	26.5616	22.2731	0.433468	0.279604
CALCOCO2	159.573	0	11.5213	6.69441
CALCRL	0.959873	56.5139	-5.89294	-6.11459
CALHM2	8.91834	48.203	-2.28539	-2.54538
CALM1	762.318	1073.1	-0.316055	-0.600128
CALM3	106.359	141.285	-0.230555	-0.250449
CALR	1411.66	1212.72	0.399436	0.680455
CALU	32.7691	116.352	-1.63564	-3.24505
CAMK1D	189.951	82.4438	1.38008	4.9309
CAMK2D	364.215	281.24	0.537455	0.812118
CAMK2G	50.12	20.6109	1.46744	2.31584
CAMK4	15.6946	0.332435	5.731	2.90543
CAMKK1	10.7577	6.64869	0.906672	0.357898
CAMKK2	14.2906	28.5894	-0.814156	-0.499392
CAMKMT	19.0749	22.2731	-0.0567582	-0.025044
CAMLG	110.907	42.8841	1.54614	4.31472
CAMSAP1	14.8184	11.3028	0.570414	0.28455
CAMSAP2	0	37.2327	-7.75049	-5.78384
CAMTA1	55.6271	30.584	1.03684	1.46439
CAMTA2	23.7937	27.2596	-0.00914993	-0.00438645
CAND1	92.5239	52.1922	0.996661	1.87992
CANT1	34.8808	66.8194	-0.770766	-0.836431
CANX	190.411	381.967	-0.828221	-2.28244
CAP1	76.4546	391.608	-2.18332	-11.0686
CAPG	47.252	335.427	-2.64242	-9.98624
CAPN1	72.3325	64.1599	0.336613	0.31293
CAPN10	18.4484	16.2893	0.342084	0.168232
CAPN12	12.1038	0	7.78421	2.88503
CAPN15	23.1937	36.2354	-0.471258	-0.323165
CAPN2	87.9124	13.6298	2.87344	9.13523
CAPN7	55.5981	109.039	-0.79902	-1.22356
CAPNS1	173.956	201.123	-0.0291461	-0.0268595
CAPRIN1	212.027	307.502	-0.36397	-0.596148
CAPRIN2	16.529	9.30817	0.997825	0.637444
CAPZA2	70.0987	516.603	-2.70392	-17.2827
CAPZB	159.41	355.373	-0.981476	-2.91504
CARD11	189.962	92.0844	1.22769	3.30481
CARD19	15.1523	40.8895	-1.25887	-1.16085
CARD6	1.58617	102.722	-5.80818	-10.8785
CARF	16.8359	12.965	0.554911	0.295538
CARHSP1	51.7748	8.97574	2.7082	5.92416
CARM1	23.4176	32.2462	-0.2849	-0.15315
CARNMT1	19.2134	41.2219	-0.946914	-0.771632
CARNS1	13.8319	0	8.01912	3.08037
CARS	35.3545	46.5409	-0.220387	-0.145923
CARS2	146.684	26.5948	2.63117	11.6118
CASC3	85.7388	138.958	-0.516863	-0.724452
CASC4	74.4647	20.9434	2.00211	5.26658
CASC5	17.1422	19.9461	-0.0361544	-0.0143579
CASD1	25.308	40.8895	-0.521271	-0.377854
CASK	25.2514	4.98652	2.50035	3.00753
CASP1	3.49251	107.709	-4.75713	-11.0295
CASP2	13.0362	50.1976	-1.78398	-2.09947
CASP3	53.0931	62.8301	-0.0739236	-0.051328
CASP5	0	75.7951	-8.77602	-8.94083
CASP6	0.848681	30.584	-5.03835	-3.7031
CASP7	59.8683	28.5894	1.23496	1.54028
CASP8	176.928	158.571	0.333964	0.445177
CASP8AP2	9.21122	40.8895	-1.96981	-2.06405
CASP9	72.4251	18.2839	2.16882	4.6445
CAST	208.707	124.331	0.922935	2.58233
CASZ1	113.421	38.8949	1.71403	5.06121
CAT	81.0403	159.569	-0.816382	-1.31041
CBFA2T2	38.2337	21.6083	0.994163	1.09658
CBFA2T3	62.7943	47.8706	0.570034	0.631748
CBFB	48.6669	119.676	-1.13592	-2.01737
CBL	47.2359	109.703	-1.04385	-1.79959
CBLB	197.434	246.334	-0.145472	-0.171015
CBLL1	113.375	88.4276	0.541318	0.755211
CBLN3	15.3458	0	8.13887	3.14634
CBR4	30.1911	12.965	1.38708	1.49703
CBX1	27.1305	156.909	-2.3675	-7.08264
CBX3	163.708	87.7627	1.07417	3.00753
CBX4	175.845	124.663	0.674413	1.3672
CBX5	72.9303	55.849	0.54902	0.611241
CBX6	57.3252	21.2758	1.60562	2.82164
CBX7	64.237	90.4222	-0.326059	-0.318575
CBY1	6.99827	10.9703	-0.486529	-0.167163
CC2D1A	18.4469	34.2408	-0.738298	-0.44585
CC2D1B	26.7004	46.8733	-0.639366	-0.543255
CCAR1	145.138	117.682	0.481108	0.74412
CCAR2	79.1403	44.5462	1.00183	1.78668
CCDC106	34.4796	0	9.32229	4.33917
CCDC107	37.2053	35.5705	0.236982	0.149392
CCDC109B	158.307	0	11.5107	6.67738
CCDC112	14.4982	4.98652	1.71872	1.23517
CCDC114	18.142	9.97304	1.02147	0.671904
CCDC115	37.6663	39.5597	0.113307	0.0691214
CCDC117	27.6595	48.203	-0.633896	-0.554139
CCDC12	85.2912	52.1922	0.88301	1.44772
CCDC120	32.0727	0	9.21692	4.2336
CCDC122	18.1724	11.3028	0.875507	0.533834
CCDC124	17.7114	55.5166	-1.48746	-1.79557
CCDC125	3.2832	26.9272	-2.87342	-2.04534
CCDC126	13.4424	12.3001	0.320196	0.11241
CCDC127	4.02118	86.7654	-4.24178	-8.51593
CCDC130	44.1076	12.965	1.94753	3.30395
CCDC134	27.4687	84.106	-1.41582	-2.01615
CCDC137	22.7625	38.23	-0.573373	-0.423462
CCDC138	18.3237	8.97574	1.19957	0.872171
CCDC14	36.3988	4.98652	3.04694	5.34121
CCDC141	85.3177	0	10.62	5.67623
CCDC15	2.11484	27.9245	-3.52747	-2.72593
CCDC157	18.9501	8.6433	1.30664	1.01051
CCDC159	33.8102	0	9.28357	4.2964
CCDC167	13.2187	8.6433	0.799723	0.406435
CCDC17	0.640025	16.2893	-4.52074	-0.546545
CCDC171	3.50575	19.2812	-2.33071	-1.34667
CCDC173	71.1127	2.65948	4.91634	12.179
CCDC174	136.849	49.8652	1.62524	5.12966
CCDC18	22.4564	5.65139	2.16267	2.39611
CCDC180	17.1277	0	8.30766	3.31692
CCDC186	81.7841	54.1868	0.767113	1.19249
CCDC191	20.159	15.6244	0.523942	0.290873
CCDC22	37.5238	39.2273	0.102772	0.062538
CCDC25	26.0606	53.522	-0.864341	-0.873208
CCDC28A	54.1275	23.6029	1.38309	2.16869
CCDC28B	8.68206	28.5894	-1.54394	-1.19666
CCDC43	41.6697	17.9515	1.38114	1.88736
CCDC47	48.1835	79.1194	-0.539571	-0.596627
CCDC50	174.812	118.679	0.733796	1.63095
CCDC53	36.3278	51.5274	-0.332558	-0.254192
CCDC57	42.2823	0.332435	7.1599	4.88993
CCDC58	6.67792	26.5948	-1.83631	-1.33329
CCDC59	288.363	82.4438	1.98209	11.1991
CCDC6	134.187	35.5705	2.0939	8.09451
CCDC61	4.8697	11.9676	-1.1218	-0.447178
CCDC66	30.8628	14.9596	1.23393	1.25979
CCDC69	139.89	26.9272	2.5544	11.1424
CCDC71	45.3868	38.8949	0.401278	0.323165
CCDC71L	23.5001	38.23	-0.525512	-0.380031
CCDC77	21.246	27.2596	-0.181158	-0.078168
CCDC84	58.2018	26.9272	1.29031	2.17034
CCDC86	32.0571	86.7654	-1.26728	-1.37222
CCDC88A	10.823	7.31356	0.713264	0.278365
CCDC88B	68.1492	13.6298	2.49774	6.40379
CCDC88C	162.983	107.709	0.770576	1.68713
CCDC9	59.7063	102.722	-0.601491	-0.730105
CCDC90B	64.6796	18.9488	1.93398	4.03943
CCDC91	55.1418	16.9542	1.8818	3.8081
CCDC92	35.1735	10.6379	1.89776	2.8098
CCDC93	225.249	39.5597	2.69213	13.2802
CCDC94	129.122	49.2003	1.5702	4.2721
CCDC97	72.0163	72.8032	0.157315	0.131352
CCL20	19.7184	0	8.53257	1.9621
CCL25	0.20882	23.6029	-6.13108	-3.26309
CCM2	54.6513	292.875	-2.25118	-9.6601
CCNA2	0.20882	12.3001	-5.19079	-1.82649
CCNB1IP1	23.7801	0	8.79152	3.80812
CCNC	83.8429	76.1275	0.313267	0.316979
CCND1	16.738	0.997304	4.24128	3.51647
CCND2	30.1668	80.7816	-1.23678	-1.70254
CCND3	439.519	173.863	1.51108	6.36977
CCNDBP1	184.001	102.39	1.01498	2.51983
CCNG1	111.696	89.7574	0.486091	0.681336
CCNG2	18.3111	120.009	-2.52935	-6.36745
CCNH	182.205	63.8275	1.69202	6.35027
CCNI	602.894	33.5759	4.34344	51.7705
CCNJ	14.6941	16.2893	0.044109	0.0160174
CCNK	178.009	1.99461	6.66246	20.8724
CCNL1	1927.43	478.041	2.18414	20.6096
CCNL2	49.271	192.147	-1.7754	-4.96639
CCNT1	120.788	232.704	-0.767597	-1.66481
CCNT2	88.9962	89.0925	0.180526	0.15951
CCNY	129.359	95.4087	0.617634	1.05389
CCNYL1	45.1785	14.6271	1.8062	3.05383
CCP110	5.92704	10.6379	-0.669012	-0.22929
CCPG1	96.861	52.1922	1.05803	1.93993
CCR6	117.714	239.353	-0.842845	-1.74764
CCR7	410.273	2409.49	-2.37513	-20.3965
CCS	24.1253	17.9515	0.598018	0.347392
CCSAP	35.8024	30.2516	0.426447	0.263417
CCSER1	79.8382	0.332435	8.08525	6.34172
CCSER2	46.904	49.5328	0.0992168	0.0669096
CCT2	204.423	279.578	-0.274777	-0.399905
CCT3	95.3917	299.191	-1.47432	-5.19889
CCT4	190.701	311.491	-0.533264	-1.08387
CCT5	33.2797	477.376	-3.68069	-25.5363
CCT6B	17.1829	2.32704	3.05075	2.80416
CCT7	50.0616	88.4276	-0.64344	-0.786354
CCT8	126.294	266.945	-0.906293	-2.23209
CD14	11.9942	1.66217	3.02876	1.74536
CD151	6.9008	18.9488	-1.30621	-0.695403
CD164	385.149	615.669	-0.500496	-1.15073
CD180	124.64	504.636	-1.84178	-9.67179
CD19	250.045	861.671	-1.6161	-8.17552
CD2	0.737653	383.63	-8.70624	-19.3249
CD200	85.4752	32.2462	1.56482	2.67088
CD22	641.162	755.956	-0.066444	-0.0806256
CD27	60.8201	3.32435	4.3773	10.7266
CD274	5.09241	196.801	-5.13361	-18.3599
CD2AP	123.163	132.641	0.0673584	0.0626393
CD2BP2	28.7172	50.8625	-0.655847	-0.598755
CD320	13.0368	17.619	-0.266999	-0.112614
CD36	8.39	109.039	-3.55675	-6.83389
CD37	7020.24	1681.79	2.23973	19.6848
CD38	68.4579	460.09	-2.59774	-7.89086
CD3EAP	1.80839	11.3028	-2.53973	-0.959112
CD40	219.638	84.106	1.55775	6.325
CD44	1273.75	168.544	3.0963	32.3868
CD46	174.896	1.32974	7.21522	17.9334
CD47	318.626	463.414	-0.369949	-0.656669
CD48	683.438	279.91	1.46376	7.09514
CD5	17.155	10.9703	0.815949	0.488218
CD53	425.94	1613.64	-1.74683	-12.3634
CD6	12.2456	0.664869	4.40214	2.64373
CD63	33.3659	1.66217	4.50489	6.33188
CD68	65.9937	5.98382	3.64169	7.24455
CD69	3071.4	1055.15	1.71459	12.8359
CD7	10.1719	0.664869	4.12138	2.07395
CD70	35.38	0	9.33987	4.25774
CD72	71.877	616.999	-2.92676	-19.6806
CD74	32045.5	36853.7	-0.0248529	-0.0311836
CD79A	3681.71	6727.15	-0.693061	-2.41331
CD79B	267.264	3057.4	-3.35555	-20.2462
CD80	59.2195	5.65139	3.57038	7.93199
CD81	432.544	244.672	0.994981	3.5284
CD82	227.562	91.0871	1.49786	5.92508
CD83	5727.4	1355.34	2.25905	16.6853
CD84	44.0477	192.48	-1.97022	-5.07622
CD86	57.3365	204.78	-1.66896	-5.11539
CD9	24.193	79.4519	-1.56489	-2.23114
CD93	4.56358	29.9191	-2.56385	-2.09647
CD96	29.6469	0.664869	5.63931	4.58294
CD99L2	16.5158	7.646	1.2886	0.912447
CDADC1	18.8927	63.1626	-1.59233	-2.02155
CDAN1	16.5427	50.1976	-1.43988	-1.62082
CDC123	77.3761	48.203	0.861923	1.37917
CDC14A	104.474	37.5651	1.64495	3.96105
CDC16	29.3162	49.2003	-0.56924	-0.480774
CDC23	12.7165	12.965	0.137953	0.0518591
CDC25A	0.20882	22.6056	-6.0688	-3.15283
CDC25B	93.0851	64.1599	0.71663	1.06252
CDC26	22.7493	29.5867	-0.198499	-0.105521
CDC27	59.3819	73.4681	-0.13498	-0.0950138
CDC37	256.932	170.539	0.767407	1.9607
CDC37L1	32.3205	86.433	-1.25129	-2.0106
CDC40	121.93	139.955	-0.018406	-0.0144521
CDC42	314.356	629.299	-0.819844	-2.10129
CDC42BPB	17.8084	5.31895	1.90713	1.63989
CDC42EP3	4.85646	21.2758	-1.91853	-1.16918
CDC42SE1	504.63	245.004	1.21724	4.85201
CDC42SE2	410.281	212.426	1.13025	3.75259
CDC45	1.15529	14.9596	-3.3836	-1.43673
CDC5L	91.1461	51.1949	1.00221	1.89391
CDC7	3.92273	21.9407	-2.34159	-1.15407
CDC73	119.872	94.079	0.5315	0.769014
CDCA3	0	10.9703	-5.98751	-2.0173
CDCA4	15.3749	99.398	-2.52688	-4.9073
CDCA7	8.91752	13.6298	-0.465231	-0.173438
CDCA7L	145.458	7.646	4.41594	18.89
CDH17	0	14.2947	-6.36939	-2.62981
CDH24	1.27956	11.6352	-3.13184	-1.08488
CDIP1	36.3988	67.1518	-0.703088	-0.758116
CDIPT	22.3713	72.1383	-1.53068	-2.19038
CDK10	26.6154	41.5543	-0.480458	-0.349597
CDK12	69.2487	109.703	-0.488062	-0.618913
CDK13	179.566	131.977	0.615654	1.21522
CDK14	241.359	9.6406	4.82013	33.0134
CDK16	110.054	49.2003	1.33179	3.0834
CDK17	171.509	151.923	0.356494	0.427735
CDK19	20.4516	59.5058	-1.37795	-1.6501
CDK2	13.7611	72.8032	-2.22181	-3.74414
CDK2AP2	37.9146	196.136	-2.19714	-7.64463
CDK4	24.6958	141.95	-2.35926	-6.59331
CDK5	3.59014	57.8436	-3.78319	-5.32384
CDK5R1	66.5247	24.2677	1.63626	2.73023
CDK5RAP1	53.6224	23.2704	1.37524	2.28618
CDK5RAP2	42.7296	19.2812	1.32769	1.72111
CDK5RAP3	61.3044	31.5813	1.13366	1.8785
CDK6	33.9921	13.6298	1.49672	1.87493
CDK7	38.8487	75.4627	-0.776309	-0.908905
CDK8	31.3476	35.2381	0.00601537	0.0033164
CDK9	39.5141	108.706	-1.28932	-2.45444
CDKAL1	114.052	97.7358	0.399129	0.524418
CDKL3	25.0868	13.6298	1.05872	0.924563
CDKL5	17.084	3.65678	2.37815	2.02488
CDKN1A	904.351	20.6109	5.64138	41.7132
CDKN1B	393.168	531.231	-0.257148	-0.411233
CDKN2AIP	59.8304	45.2111	0.582383	0.639593
CDKN2AIPNL	41.2384	98.7331	-1.09462	-1.76956
CDKN2C	2.85249	11.6352	-1.82593	-0.722402
CDNF	6.9981	36.5678	-2.22946	-2.18825
CDR2	17.1424	7.646	1.34766	0.991282
CDS2	129.245	101.06	0.529887	0.809184
CDT1	0.639861	225.723	-8.50938	-12.5838
CDV3	337.703	236.029	0.692787	1.85093
CDYL2	8.04286	51.1949	-2.48037	-3.02237
CEBPB	28.7451	194.142	-2.59416	-8.02082
CEBPG	98.5347	58.1761	0.931573	1.80092
CEBPZ	140.228	263.288	-0.727635	-1.4758
CEBPZOS	23.7093	23.9353	0.1652	0.0858551
CECR2	0.320012	53.8544	-7.32119	-5.89429
CECR5	16.7375	22.6056	-0.264885	-0.125913
CELF1	87.5576	112.363	-0.186255	-0.172282
CELF2	524.285	293.54	1.01151	3.81221
CENPA	26.9932	103.387	-1.75748	-3.61258
CENPB	50.1165	39.2273	0.525213	0.518253
CENPC	353.711	48.203	3.05421	22.7889
CENPH	13.5518	1.99461	2.93858	2.29137
CENPJ	12.7029	10.6379	0.430079	0.179945
CENPK	19.5893	14.2947	0.622863	0.34895
CENPL	12.3697	19.2812	-0.453281	-0.206531
CENPM	138.835	5.65139	4.79632	19.3578
CENPN	17.3375	5.98382	1.72277	1.38661
CENPO	9.93482	17.9515	-0.662633	-0.30745
CENPP	22.9319	6.98113	1.90828	1.92456
CENPQ	4.63457	56.5139	-3.35017	-3.8806
CENPT	34.3386	11.3028	1.77408	2.44324
CENPU	7.93183	14.6271	-0.686818	-0.269821
CENPV	12.2015	3.65678	1.89854	1.20443
CENPW	4.85696	16.6217	-1.55844	-0.67965
CEP104	24.0695	22.6056	0.254386	0.135896
CEP120	102.319	88.7601	0.377303	0.467514
CEP126	31.1768	0.664869	5.70845	5.13921
CEP128	9.41955	29.2542	-1.45587	-1.12477
CEP131	17.4624	6.98113	1.50486	1.17467
CEP135	56.4034	42.2192	0.583907	0.619869
CEP152	21.4829	14.9596	0.700822	0.465656
CEP162	6.03839	10.3055	-0.601254	-0.204434
CEP164	30.1787	18.2839	0.897863	0.827954
CEP170	87.4186	82.1114	0.262406	0.262308
CEP170B	1.47498	10.6379	-2.61444	-0.878656
CEP19	10.5887	6.31626	0.925236	0.425184
CEP192	37.0397	51.1949	-0.284918	-0.207092
CEP250	6.56673	29.2542	-1.98967	-1.54024
CEP290	18.7813	0	8.41824	3.45385
CEP295	56.532	70.8086	-0.147452	-0.113363
CEP350	86.859	69.8113	0.483585	0.555242
CEP44	38.2595	27.2596	0.651703	0.541858
CEP57	95.7656	102.722	0.0699403	0.0595026
CEP57L1	5.73178	13.2974	-1.06755	-0.446208
CEP63	35.3104	44.5462	-0.17391	-0.107302
CEP68	47.8887	34.2408	0.651785	0.662859
CEP72	6.76248	14.9596	-0.949558	-0.419467
CEP76	15.5829	16.2893	0.102552	0.0421021
CEP78	12.0367	9.6406	0.520459	0.212847
CEP83	28.2014	50.5301	-0.678741	-0.608779
CEP85	11.3123	33.2435	-1.36426	-1.11322
CEP85L	108.878	0.664869	7.53454	10.438
CEP89	10.1852	31.9137	-1.47996	-1.03171
CEP95	154.785	27.2596	2.67567	12.9506
CEP97	16.0842	31.9137	-0.809164	-0.57402
CEPT1	105.696	123.666	-0.061188	-0.050181
CERK	22.1225	463.414	-4.20905	-29.6912
CERS2	53.0532	191.482	-1.67595	-5.08666
CERS4	28.5801	51.8598	-0.677093	-0.603711
CERS5	33.9214	65.4896	-0.779005	-0.821253
CERS6	48.4173	8.6433	2.65381	5.53652
CETN2	11.2994	99.398	-2.9223	-5.92434
CETN3	7.082	160.566	-4.29996	-13.0904
CFAP20	85.2353	71.4735	0.429276	0.518802
CFAP36	28.6639	39.5597	-0.278077	-0.174416
CFAP43	3.07487	156.244	-5.52065	-15.8708
CFAP97	43.1605	19.2812	1.34041	1.75369
CFDP1	45.5524	183.836	-1.84232	-5.66581
CFL1	1024.6	2809.41	-1.27967	-6.95123
CFL2	142.757	44.5462	1.85597	5.05777
CFLAR	151.702	46.8733	1.87003	7.31958
CFP	6.2482	51.8598	-2.86382	-2.83138
CGGBP1	118.07	223.729	-0.748713	-1.58482
CGRRF1	46.2762	37.8976	0.461252	0.415858
CHAC2	9.11228	12.965	-0.351288	-0.115467
CHAD	14.5959	0	8.08114	3.16587
CHAF1A	18.7155	12.3001	0.796035	0.491917
CHAMP1	30.2636	24.9326	0.462495	0.325605
CHCHD1	23.7498	62.4977	-1.23198	-1.54328
CHCHD10	238.777	527.906	-0.966791	-2.64828
CHCHD2	250.952	11.3028	4.64286	32.4131
CHCHD3	79.864	112.363	-0.31908	-0.353128
CHCHD5	30.0942	19.9461	0.761413	0.643043
CHCHD6	11.2142	6.31626	1.00462	0.47289
CHCHD7	59.2012	81.7789	-0.294643	-0.268761
CHD1	46.0513	179.847	-1.80657	-4.5524
CHD1L	50.2398	44.2138	0.350429	0.293065
CHD2	1876.4	496.325	2.09393	19.6715
CHD3	27.6467	33.9083	-0.119829	-0.0664449
CHD4	238.996	250.323	0.108628	0.124409
CHD6	170.223	27.9245	2.7847	15.1155
CHD7	124.634	69.1464	1.01936	2.2961
CHD8	85.5156	7.646	3.66223	13.0468
CHD9	140.649	63.495	1.3171	3.70489
CHEK2	11.1169	21.6083	-0.783788	-0.438582
CHERP	106.567	91.0871	0.404787	0.515121
CHFR	67.3997	107.376	-0.491157	-0.598235
CHIC1	29.0641	3.32435	3.29181	4.65244
CHIC2	193.418	165.552	0.401673	0.64833
CHID1	17.4614	11.3028	0.803317	0.477201
CHKA	67.5968	117.017	-0.606633	-0.791289
CHL1	15.8198	0	8.18499	3.17503
CHM	30.9432	53.522	-0.622077	-0.576206
CHMP1A	49.5328	43.8814	0.351431	0.293676
CHMP2A	88.9545	128.32	-0.345409	-0.38897
CHMP2B	145.509	99.7304	0.719219	1.45985
CHMP4B	85.8228	159.236	-0.710496	-1.22036
CHMP5	38.2196	109.039	-1.34029	-2.34026
CHMP6	13.245	13.2974	0.15915	0.0611056
CHMP7	355.805	22.938	4.12656	37.0211
CHORDC1	101.131	211.761	-0.8819	-1.76695
CHP1	68.1938	113.028	-0.548833	-0.650724
CHPF	3.06164	24.6002	-2.78031	-1.85004
CHPF2	54.6389	51.1949	0.268746	0.223833
CHPT1	286.073	8.6433	5.22669	38.2821
CHRAC1	130.24	115.022	0.347307	0.433251
CHRNB1	4.35443	14.9596	-1.64259	-0.770903
CHST10	23.8797	34.2408	-0.320274	-0.156259
CHST11	214.178	12.3001	4.29947	29.1432
CHST12	5.49632	100.728	-3.98616	-9.04952
CHST15	42.3257	120.009	-1.32432	-2.56544
CHST2	10.8689	0	7.68121	2.70934
CHST3	0	148.931	-9.75049	-12.2632
CHSY1	41.3815	149.928	-1.67344	-3.99856
CHTF8	68.1741	213.091	-1.47398	-3.30443
CHTOP	138.502	58.1761	1.418	3.70859
CHUK	46.2376	119.012	-1.17934	-2.15081
CHURC1	98.3423	48.8679	1.1848	2.6621
CIAO1	51.9836	65.1572	-0.1454	-0.103066
CIAPIN1	21.5369	34.9056	-0.538667	-0.357308
CIART	0.319848	36.2354	-6.74952	-4.53334
CIB1	218.152	83.7735	1.55521	6.04178
CIC	63.8655	80.4492	-0.151967	-0.110039
CIDEB	12.3834	0	7.84065	2.96107
CIITA	869.357	296.864	1.71552	6.76096
CINP	11.1038	22.2731	-0.814006	-0.460091
CIPC	29.956	61.5004	-0.861247	-0.950762
CIR1	183.87	20.2785	3.35589	20.4718
CIRBP	1005.44	381.303	1.57055	9.61738
CISD1	11.5478	36.5678	-1.49627	-1.36291
CISD2	62.793	230.045	-1.69715	-5.76172
CISH	4.45255	12.965	-1.37131	-0.567612
CITED2	141.783	139.29	0.203321	0.222533
CITED4	14.733	0.332435	5.62918	2.75757
CIZ1	112.342	55.1842	1.20364	2.8593
CKAP2	85.5571	4.98652	4.27853	14.3755
CKAP4	71.7331	20.9434	1.96589	3.16468
CKAP5	19.4531	40.8895	-0.878158	-0.710963
CKLF	24.5304	115.687	-2.05056	-4.25913
CKS2	36.6078	104.052	-1.32485	-2.40936
CLASP1	87.6526	64.4923	0.610679	0.845069
CLASP2	69.564	73.8005	0.0786696	0.0575164
CLASRP	156.013	60.1707	1.54816	5.46443
CLCC1	29.8453	29.2542	0.207955	0.1216
CLCF1	42.6179	78.4546	-0.708285	-0.744508
CLCN2	0.20882	10.3055	-4.93553	-1.53642
CLCN3	130.102	84.4384	0.793236	1.53254
CLCN4	18.8207	103.387	-2.32851	-3.20314
CLCN5	9.30869	33.5759	-1.66246	-1.45683
CLCN6	34.2717	33.5759	0.216353	0.131924
CLCN7	90.1321	40.2246	1.33749	3.13639
CLDN10	0	14.6271	-6.40256	-2.68771
CLDND1	87.3233	69.4788	0.507097	0.656669
CLEC12A	4.67527	21.9407	-2.07129	-1.01545
CLEC16A	57.851	46.8733	0.472395	0.478051
CLEC7A	10.1719	0.664869	4.12138	2.07395
CLIC1	219.404	727.035	-1.55338	-6.18347
CLIC4	127.5	103.387	0.486801	0.593934
CLINT1	135.034	327.448	-1.10142	-3.28584
CLIP1	36.5509	10.6379	1.95288	3.0174
CLIP2	12.9389	10.6379	0.442767	0.187551
CLIP4	10.3664	0	7.59153	2.73403
CLK1	802.713	615.669	0.556136	1.54525
CLK2	31.5417	114.358	-1.68273	-3.36845
CLK3	89.8123	21.6083	2.22914	7.13228
CLK4	118.184	347.727	-1.38082	-5.05652
CLMN	40.7527	0	9.55487	4.57086
CLN6	21.0646	14.6271	0.698763	0.436656
CLNS1A	83.4053	108.041	-0.212037	-0.174899
CLOCK	10.4633	42.8841	-1.84353	-1.8223
CLP1	19.6036	122.004	-2.47258	-6.28358
CLPB	12.2588	16.2893	-0.217231	-0.0853503
CLPP	32.8234	46.2084	-0.314433	-0.220449
CLPTM1	65.1995	86.1006	-0.224849	-0.195451
CLPTM1L	27.4826	163.225	-2.37222	-6.11431
CLPX	21.8299	40.2246	-0.714004	-0.579091
CLSTN1	200.433	3.98922	5.82092	27.6698
CLTA	137.263	839.397	-2.43216	-17.6965
CLTB	55.2539	26.9272	1.21889	1.8264
CLTC	118.498	381.635	-1.51915	-5.86621
CLUH	32.157	53.522	-0.546714	-0.450534
CLYBL	20.1193	15.9569	0.510264	0.29692
CMAS	7.83387	63.8275	-2.84266	-4.36491
CMC1	13.0357	30.9164	-1.08763	-0.736192
CMC2	70.5438	17.9515	2.15137	5.34158
CMC4	42.4058	30.2516	0.6499	0.597592
CMIP	172.664	186.496	0.0595106	0.0572153
CMPK1	164.729	133.306	0.484212	0.771632
CMPK2	2.21246	16.6217	-2.67569	-1.21918
CMSS1	193.368	26.9272	3.02514	16.7471
CMTM3	17.1563	14.6271	0.409555	0.198405
CMTM6	201.183	168.544	0.433729	0.685468
CMTM7	156.097	297.197	-0.754763	-1.84741
CMTR1	42.4782	115.687	-1.27283	-2.50844
CMTR2	29.8448	24.2677	0.475458	0.332314
CNBD2	0	36.5678	-7.72449	-5.71088
CNBP	429.463	1524.88	-1.65233	-11.1435
CNDP2	67.2266	16.2893	2.20965	5.29189
CNEP1R1	16.8489	37.2327	-0.977049	-0.820741
CNIH1	91.8865	73.8005	0.491053	0.566802
CNIH4	13.5518	39.8922	-1.38236	-1.32933
CNKSR2	72.2223	0	10.374	5.38827
CNN2	299.094	252.983	0.417665	0.690487
CNN3	52.1391	192.147	-1.69135	-0.758814
CNNM2	19.3815	3.32435	2.71636	2.84264
CNNM3	27.1748	16.9542	0.866869	0.706835
CNNM4	43.7889	43.2165	0.204553	0.139008
CNOT1	315.927	128.32	1.47568	6.84423
CNOT10	57.3074	87.7627	-0.447374	-0.444497
CNOT11	45.9568	44.8787	0.20918	0.151727
CNOT2	216.029	183.504	0.413336	0.650682
CNOT3	42.1703	42.8841	0.142899	0.0926157
CNOT4	135.867	125.993	0.283935	0.356008
CNOT6	18.6038	70.1437	-1.72066	-2.52388
CNOT6L	105.942	88.0952	0.445347	0.590965
CNOT7	79.7689	100.063	-0.147323	-0.123051
CNOT8	139.079	125.993	0.315321	0.414644
CNOT9	106.083	51.8598	1.21332	2.5382
CNP	26.6294	271.932	-3.19856	-13.891
CNPPD1	160.11	174.196	0.0572638	0.0515196
CNPY3	112.728	143.612	-0.176466	-0.180348
CNPY4	6.24705	20.6109	-1.54918	-0.930497
CNR1	34.1475	0	9.3153	4.30789
CNR2	185.709	222.731	-0.086545	-0.0747828
CNRIP1	0	12.3001	-6.15258	-2.26728
CNST	96.5053	28.2569	1.94738	5.34158
CNTNAP2	42.4259	14.9596	1.66558	0.300157
CNTRL	145.808	161.896	0.016775	0.0134671
CNTROB	4.45239	17.2866	-1.79132	-0.959252
COA3	4.77224	47.5382	-3.16313	-3.90913
COA4	28.2977	7.31356	2.11297	2.43663
COA5	41.8643	54.5193	-0.214786	-0.152495
COA6	14.2057	43.8814	-1.46127	-1.49814
COA7	4.14594	36.5678	-3.01911	-2.77315
COASY	31.084	23.9353	0.559888	0.398798
COBLL1	130.88	67.4842	1.12376	2.68788
COCH	30.3871	0.332435	6.68787	4.19673
COG1	47.9727	60.5031	-0.164129	-0.114544
COG2	27.5485	33.9083	-0.129951	-0.0727021
COG3	85.4883	61.5004	0.655461	0.93
COG4	15.3463	55.849	-1.6885	-2.0173
COG5	167.449	80.4492	1.23068	3.79788
COG6	26.6985	44.8787	-0.58458	-0.442507
COG7	6.13635	13.2974	-0.92752	-0.384713
COIL	45.4149	28.5894	0.845391	0.983577
COL19A1	451.935	0	13.0164	8.45543
COL1A1	22.2926	0.332435	6.26303	3.52972
COL4A3	16.1567	0	8.24764	3.22014
COL4A3BP	46.4723	92.0844	-0.808741	-1.13902
COL4A4	32.2405	0	9.23066	4.24084
COLGALT1	22.0381	145.274	-2.55552	-7.21723
COMMD10	77.9595	25.265	1.80186	4.38456
COMMD2	25.0739	21.2758	0.422223	0.258753
COMMD3	84.151	135.301	-0.507611	-0.713056
COMMD4	3.70133	134.636	-4.97835	-13.5794
COMMD5	42.0897	19.2812	1.30668	1.64727
COMMD6	280.467	57.1788	2.47373	12.46
COMMD7	29.722	52.1922	-0.623291	-0.526664
COMMD8	22.3587	106.379	-2.08291	-4.60825
COMMD9	69.9866	3.98922	4.30953	12.3929
COMT	21.106	31.9137	-0.434895	-0.265356
COMTD1	9.0863	19.6136	-0.913349	-0.474958
COPA	114.162	144.609	-0.16635	-0.171514
COPB1	96.2544	179.515	-0.724763	-1.38846
COPB2	22.8163	128.32	-2.3422	-5.49843
COPE	168.608	173.198	0.138219	0.148977
COPG1	37.3981	122.336	-1.54292	-3.18866
COPG2	15.6539	46.8733	-1.39287	-1.47869
COPRS	10.6013	0.664869	4.15573	2.31953
COPS2	159.714	83.4411	1.12136	2.43847
COPS3	88.5204	141.617	-0.500578	-0.706835
COPS4	48.7526	123.998	-1.17782	-2.27358
COPS5	71.042	89.4249	-0.158812	-0.130577
COPS6	11.8954	54.5193	-2.04994	-2.38413
COPS7A	13.3565	32.911	-1.13783	-0.907021
COPS7B	48.1958	27.9245	0.958391	1.22561
COPS8	70.7933	93.4141	-0.222502	-0.196273
COPS9	49.0868	118.679	-1.10465	-1.8654
COPZ1	69.5955	264.95	-1.75638	-6.5695
COQ10A	25.7258	0	8.88966	3.91408
COQ10B	132.792	260.629	-0.797804	-1.9142
COQ2	41.7522	26.9272	0.797559	0.788865
COQ4	52.2176	12.3001	2.25919	4.91307
COQ5	24.0684	33.9083	-0.335935	-0.192713
COQ6	29.427	32.5786	0.0280889	0.0135954
COQ7	37.4153	27.2596	0.640686	0.5102
COQ9	13.1608	32.2462	-1.14465	-0.846421
CORO1A	656.224	2465	-1.73451	-13.1738
CORO1B	12.7039	174.861	-3.59966	-12.5032
CORO1C	45.5394	33.5759	0.613981	0.618586
CORO2A	1.16869	36.5678	-4.8645	-4.23737
CORO2B	35.7962	2.32704	4.10407	5.28768
COTL1	450.972	650.575	-0.34689	-0.521785
COX10	13.9969	23.6029	-0.5887	-0.320996
COX11	18.2125	13.2974	0.625685	0.35631
COX14	91.8801	109.703	-0.0901641	-0.0718538
COX15	17.6257	26.5948	-0.448401	-0.222442
COX16	100.818	101.725	0.160291	0.133485
COX18	25.7571	35.5705	-0.26742	-0.142299
COX19	140.253	20.6109	2.94446	14.4202
COX20	45.7206	166.882	-1.68947	-4.55231
COX4I1	646.087	600.377	0.282162	0.491768
COX5A	131.471	293.54	-0.983853	-2.58404
COX6A1	134.738	904.887	-2.57518	-21.1914
COX6B1	238.56	248.661	0.112851	0.122067
COX6C	223.754	318.472	-0.329463	-0.490846
COX7A2	86.7806	153.252	-0.642722	-1.03464
COX7A2L	60.9852	111.033	-0.685927	-0.974572
COX7C	511.052	244.672	1.23846	5.50584
CPD	19.1864	11.3028	0.930786	0.634084
CPEB2	95.3521	46.2084	1.22171	2.44803
CPEB3	20.3265	2.65948	3.10098	2.99916
CPEB4	124.68	6.31626	4.47702	20.1191
CPM	4.56292	44.5462	-3.15197	-3.46608
CPNE1	99.7414	122.004	-0.124606	-0.108452
CPNE3	41.172	34.9056	0.419042	0.340061
CPNE5	244.28	0	12.1376	7.43107
CPOX	9.00207	32.2462	-1.66747	-1.43842
CPPED1	14.8189	12.6325	0.41356	0.186517
CPQ	17.2802	0.664869	4.86708	3.5585
CPSF1	82.0646	57.8436	0.683494	0.853205
CPSF2	22.7622	168.212	-2.71105	-8.58136
CPSF3	27.0334	149.263	-2.30202	-6.51452
CPSF3L	89.8831	31.5813	1.68525	4.54482
CPSF4	4.75867	30.584	-2.49047	-2.13383
CPSF6	140.248	148.931	0.0868244	0.0783123
CPSF7	75.5677	100.063	-0.224731	-0.209887
CPT1A	20.0488	44.5462	-0.990612	-0.889295
CPT2	19.381	11.9676	0.865449	0.570527
CPTP	29.3307	12.6325	1.39312	1.53705
CR2	55.75	599.047	-3.26066	-24.6616
CRACR2A	22.7761	0	8.71129	3.75472
CRACR2B	21.4844	1.66217	3.87812	4.02099
CRADD	17.6974	32.911	-0.729328	-0.521785
CRAMP1	20.9539	3.65678	2.6952	2.93933
CRAT	5.7326	19.6136	-1.61343	-0.823715
CRBN	108.278	63.1626	0.955659	1.97257
CRCP	95.7135	47.2057	1.19657	2.69544
CREB1	246.781	199.128	0.481279	0.895395
CREB3	12.2868	83.7735	-2.58861	-4.2469
CREB3L2	51.1709	5.98382	3.26125	6.78941
CREB3L4	12.1878	0	7.80538	2.92861
CREB5	17.2926	0.332435	5.85598	3.04185
CREBBP	183.065	6.98113	4.88968	26.9582
CREBL2	25.9355	19.2812	0.60577	0.434809
CREBRF	128.355	117.349	0.306289	0.360466
CREBZF	105.392	154.915	-0.386668	-0.4709
CREG1	19.1866	29.5867	-0.457476	-0.273891
CRELD1	31.2362	28.5894	0.303089	0.196588
CRELD2	14.1653	47.5382	-1.55112	-1.67638
CREM	162.65	1172.5	-2.6639	-16.6081
CRIM1	17.1824	6.98113	1.46161	1.08887
CRIP2	13.566	1.99461	2.93901	2.25177
CRIPT	45.9166	134.304	-1.36546	-2.94878
CRK	37.4409	107.376	-1.34423	-1.85851
CRKL	54.2655	98.0682	-0.670494	-0.865336
CRLF2	0	142.947	-9.69132	-12.0632
CRLF3	61.6888	117.682	-0.768343	-1.07629
CRLS1	35.6755	45.876	-0.183776	-0.119282
CRNKL1	79.0993	62.4977	0.514831	0.648311
CROT	4.46612	25.9299	-2.40336	-1.54019
CRTAP	53.8776	10.9703	2.48052	4.84819
CRTC1	7.94408	10.3055	-0.210613	-0.0654235
CRTC2	129.995	135.633	0.112815	0.107473
CRTC3	70.1357	28.2569	1.47988	2.96116
CRY1	49.7293	59.5058	-0.0768347	-0.0518591
CRY2	110.007	35.2381	1.82344	4.91563
CRYL1	15.5693	23.9353	-0.447202	-0.240481
CRYZL1	18.4354	45.876	-1.14517	-1.16555
CSAD	40.3755	0	9.53381	4.55206
CSDE1	817.599	493.665	0.904155	3.21537
CSE1L	44.5391	220.404	-2.12293	-7.47662
CSGALNACT1	72.113	0	10.3745	5.39622
CSGALNACT2	71.9903	26.2623	1.63179	3.73127
CSK	323.526	445.795	-0.291384	-0.468331
CSNK1A1	115.638	390.943	-1.58113	-6.64986
CSNK1D	135.9	177.52	-0.205428	-0.226847
CSNK1E	33.7944	20.6109	0.879946	0.804266
CSNK1G1	22.6384	38.8949	-0.596531	-0.446705
CSNK1G2	160.04	174.861	0.0516741	0.0486603
CSNK1G3	273.66	330.44	-0.100815	-0.115444
CSNK2A2	75.0397	49.2003	0.790213	1.13859
CSNK2B	220.072	245.337	0.0175464	0.0160174
CSPP1	26.5742	42.5516	-0.507388	-0.367539
CSRNP1	335.186	5.65139	6.07225	36.1024
CSRP1	23.6254	118.014	-2.14923	-5.14907
CSRP2	0.737488	17.619	-4.30666	-2.10075
CST3	38.4886	324.124	-2.88192	-1.37063
CST7	13.5802	0.332435	5.52736	2.56469
CSTB	126.321	137.628	0.0487485	0.0428936
CSTF1	18.4934	46.5409	-1.13304	-1.03705
CSTF2	13.0373	60.8355	-2.05331	-2.82475
CSTF2T	57.4641	76.1275	-0.227578	-0.188651
CSTF3	27.4626	66.8194	-1.1262	-1.25902
CTB-133G6.1	294.789	283.899	0.228345	0.307566
CTB-50L17.10	5.37206	75.4627	-3.55336	-5.35009
CTBP1	153.453	215.085	-0.313412	-0.444917
CTBS	101.817	14.6271	2.96974	11.6623
CTC1	128.295	37.2327	1.95576	7.09388
CTCF	104.225	290.548	-1.30748	-4.2631
CTDNEP1	207.122	142.614	0.714908	1.60352
CTDP1	45.1798	61.168	-0.253771	-0.19428
CTDSP1	63.3657	122.336	-0.765678	-1.1799
CTDSP2	104.393	86.7654	0.440167	0.562906
CTDSPL2	139.373	75.7951	1.05331	2.69279
CTH	15.4323	2.99191	2.56253	2.00977
CTIF	16.0849	0	8.22137	3.29613
CTLA4	0.528668	42.5516	-6.12147	-4.74714
CTNNA1	44.273	30.584	0.707118	0.744508
CTNNB1	314.793	421.195	-0.241496	-0.351539
CTNNBIP1	10.9218	5.31895	1.20264	0.610727
CTNNBL1	47.8627	54.8517	-0.0224761	-0.0135954
CTNS	14.5378	36.2354	-1.16955	-0.905065
CTPS1	71.1421	49.8652	0.690721	0.938682
CTPS2	7.10864	183.836	-4.56101	-14.8335
CTR9	64.2362	73.4681	-0.0278358	-0.0184991
CTSA	43.188	299.524	-2.62564	-7.63727
CTSB	44.9275	135.633	-1.42153	-3.05391
CTSC	69.0403	521.922	-2.74205	-18.5247
CTSE	0	212.093	-10.2605	-14.0676
CTSH	210.995	660.88	-1.47608	-5.85949
CTSO	32.8757	130.314	-1.8284	-4.16969
CTSS	361.719	1205.08	-1.55915	-8.14033
CTSV	0.20882	29.2542	-6.44077	-3.85961
CTSW	23.2231	0.332435	6.30623	3.47857
CTSZ	68.2168	202.453	-1.39899	-3.89523
CTU2	12.8412	104.717	-2.88293	-6.38385
CUEDC2	10.6321	55.849	-2.16502	-2.07939
CUL1	168.664	145.606	0.388679	0.593934
CUL2	94.8645	92.0844	0.219462	0.220297
CUL3	305.648	162.228	1.09072	3.77912
CUL4A	42.6732	31.9137	0.593967	0.568578
CUL4B	91.6776	87.0979	0.249871	0.255128
CUL5	75.5526	65.1572	0.392305	0.41923
CUL7	11.9659	9.30817	0.538869	0.233208
CUL9	21.6914	3.98922	2.62035	2.8992
CUTA	183.052	97.4034	1.08781	3.12852
CUTC	39.5975	20.2785	1.13819	1.35564
CUX1	103.62	198.463	-0.756406	-1.41566
CUZD1	22.0513	0	8.65565	3.68476
CWC15	147.512	82.1114	1.01938	2.61643
CWC27	31.0678	41.8868	-0.267185	-0.17176
CWF19L1	50.5777	34.5732	0.729536	0.829496
CWF19L2	118.869	96.7385	0.477751	0.648098
CXCL16	26.3688	0	8.93886	3.87248
CXCR3	21.4133	1.66217	3.85979	4.05942
CXCR4	7423.22	1507.92	2.47714	21.3821
CXCR5	660.694	834.079	-0.153777	-0.165138
CXXC1	34.9366	156.909	-1.99261	-5.43409
CXXC5	179.455	80.4492	1.33006	3.94504
CXorf21	14.1781	80.1168	-2.31582	-4.11824
CXorf23	3.08795	36.9002	-3.50195	-3.02454
CXorf38	56.5239	31.5813	0.995948	1.0086
CXorf56	28.8029	1.99461	4.03355	5.28624
CXorf57	17.266	0	8.30924	3.36845
CYB561	11.1176	0.332435	5.24469	2.35328
CYB561A3	222.509	215.75	0.211945	0.237833
CYB561D1	17.9207	31.2489	-0.634458	-0.403592
CYB5A	23.709	69.1464	-1.36595	-1.92987
CYB5B	37.6489	126.325	-1.58368	-3.31355
CYB5D2	39.6936	11.6352	1.93885	2.53892
CYB5R1	20.648	12.965	0.847086	0.593677
CYB5R3	86.5339	59.8382	0.715483	1.03544
CYB5R4	142.365	74.4654	1.10986	2.76889
CYBA	984.186	611.015	0.860753	3.10577
CYBB	162.105	297.197	-0.702833	-1.61574
CYC1	35.7151	98.4007	-1.29559	-2.2834
CYFIP2	351.543	212.093	0.903596	2.98893
CYHR1	18.4484	33.2435	-0.688043	-0.484576
CYLD	201.458	111.366	1.03138	2.87861
CYP20A1	73.7014	22.938	1.8599	4.66865
CYP27A1	1.05767	14.2947	-3.54808	-1.51388
CYP2R1	28.8007	20.2785	0.67898	0.530222
CYP2U1	28.8017	1.32974	4.61364	5.7017
CYP39A1	0.20882	21.6083	-6.0037	-3.03672
CYP4F3	0	47.8706	-8.11306	-6.83307
CYP4V2	33.3775	22.2731	0.751363	0.668606
CYP51A1	60.6928	86.1006	-0.32756	-0.304204
CYSLTR1	47.6994	0	9.79321	4.8072
CYSTM1	56.2559	17.619	1.85892	3.61381
CYTH1	276.981	886.603	-1.50312	-8.31424
CYTH2	26.4367	117.349	-1.96343	-4.20035
CYTH3	5.81601	16.2893	-1.29883	-0.634084
CYTH4	74.3514	194.142	-1.21581	-2.74692
CYTIP	1391.61	1507.92	0.0608943	0.0794981
D2HGDH	23.0825	41.2219	-0.662433	-0.533313
DAAM1	37.7897	10.9703	1.961	3.10332
DAB1	35.6161	0	9.34859	4.34919
DAD1	74.6853	949.433	-3.50028	-31.1186
DAG1	37.066	38.23	0.12977	0.0813113
DAGLB	123.776	24.2677	2.52569	10.7535
DALRD3	32.1951	32.911	0.138663	0.0796141
DAP3	103.979	109.039	0.108843	0.0982879
DAPP1	212.927	156.244	0.616531	1.24074
DARS	80.0412	89.0925	0.0114087	0.0080738
DARS2	6.88707	11.6352	-0.588212	-0.214528
DAXX	19.0736	43.5489	-1.03158	-0.81599
DAZAP1	67.2703	128.652	-0.765949	-1.23627
DAZAP2	1212.11	801.168	0.776342	2.35193
DBF4	193.795	39.2273	2.48307	13.2218
DBI	182.358	163.89	0.332995	0.475122
DBNDD1	19.0749	0	8.45282	3.51339
DBNL	175.793	322.462	-0.705398	-1.62328
DBP	12.2854	22.2731	-0.68712	-0.380904
DBR1	16.1519	45.5435	-1.35144	-1.19206
DBT	10.0323	18.9488	-0.723017	-0.32931
DCAF1	64.5153	66.4869	0.125802	0.0963928
DCAF10	36.7188	42.2192	-0.0216678	-0.0115514
DCAF11	50.0899	112.695	-0.993592	-1.71328
DCAF12	2.54604	156.577	-5.81172	-15.8496
DCAF13	78.22	114.69	-0.383909	-0.442888
DCAF15	40.2527	40.557	0.164127	0.106618
DCAF17	21.5097	24.2677	-0.00625339	-0.00300667
DCAF5	58.2155	59.8382	0.137978	0.103897
DCAF6	39.2457	37.8976	0.206312	0.118787
DCAF7	42.4761	147.269	-1.62648	-3.61796
DCAKD	19.4799	27.2596	-0.30406	-0.160836
DCK	111	91.0871	0.45536	0.589116
DCLK2	22.7089	28.2569	-0.122068	-0.0577143
DCLRE1B	9.64259	25.9299	-1.25181	-0.817367
DCLRE1C	28.8279	112.363	-1.79796	-3.88193
DCP1B	3.58998	17.9515	-2.11338	-1.13448
DCP2	88.9055	37.8976	1.39969	3.25782
DCPS	32.9486	70.4761	-0.920275	-1.04086
DCTD	49.6848	2.32704	4.58779	9.27381
DCTN1	57.9402	29.2542	1.17164	1.7582
DCTN2	106.256	134.968	-0.174796	-0.173214
DCTN3	50.3535	112.695	-0.9913	-1.52139
DCTN4	94.0045	112.03	-0.0727272	-0.059402
DCTN5	40.2838	152.588	-1.72916	-3.90255
DCTN6	57.5369	59.5058	0.137498	0.0982879
DCTPP1	12.7158	21.2758	-0.582252	-0.280333
DCUN1D1	37.1105	25.5975	0.724119	0.651263
DCUN1D2	14.3308	13.9623	0.200803	0.0761372
DCUN1D4	36.2447	7.646	2.41629	3.9647
DCUN1D5	53.6789	317.808	-2.38984	-11.521
DCXR	62.5536	14.2947	2.301	3.63603
DDA1	109.075	205.777	-0.732592	-1.34982
DDAH2	16.2227	7.31356	1.31463	0.907889
DDB1	70.792	179.182	-1.16885	-2.72511
DDB2	29.7742	76.1275	-1.18682	-1.70898
DDHD1	81.1289	50.1976	0.864347	1.41649
DDHD2	56.3358	12.6325	2.33022	5.38516
DDIT3	360.533	183.504	1.1446	3.85412
DDIT4	70.7014	15.6244	2.36422	4.83371
DDOST	118.087	126.99	0.071659	0.0641418
DDR1	16.1696	0	8.24124	3.27974
DDRGK1	40.8787	136.963	-1.56912	-3.74562
DDX1	45.039	43.5489	0.222366	0.151663
DDX10	30.5967	96.0736	-1.47259	-2.72244
DDX11	11.0578	16.6217	-0.462196	-0.14385
DDX17	678.475	152.92	2.31949	16.3318
DDX18	142.516	111.366	0.528307	0.856341
DDX19A	64.4748	87.4303	-0.266181	-0.238208
DDX20	77.2255	33.5759	1.38555	2.76827
DDX21	578.64	545.525	0.266055	0.343498
DDX23	55.2907	131.644	-1.08238	-1.98848
DDX24	697.589	173.198	2.19014	12.6841
DDX27	230.385	153.252	0.763956	1.94136
DDX31	70.2615	34.5732	1.19166	2.16447
DDX39A	216.281	183.836	0.404859	0.660301
DDX39B	399.709	425.849	0.0868137	0.0990102
DDX3Y	261.025	0	24.5893	4.20158
DDX41	31.7394	148.266	-2.03562	-5.08067
DDX42	57.771	144.277	-1.13936	-2.35827
DDX46	113.216	233.369	-0.868791	-2.07396
DDX47	230.699	148.598	0.814842	1.93826
DDX49	30.0685	61.5004	-0.852526	-0.926883
DDX5	5530.49	4450.3	0.488603	1.27606
DDX50	92.2208	95.7412	0.122389	0.108632
DDX51	30.1921	30.2516	0.168267	0.0981863
DDX54	103.391	137.296	-0.23678	-0.2603
DDX55	16.0849	32.911	-0.849215	-0.628247
DDX56	67.2731	75.4627	0.00890798	0.00625439
DDX58	25.5435	81.4465	-1.51165	-2.30125
DDX59	28.5664	19.6136	0.727227	0.574465
DDX6	520.555	506.963	0.216807	0.311569
DDX60	15.5693	8.97574	0.967969	0.590178
DEAF1	35.4106	24.2677	0.718095	0.587713
DECR1	67.551	19.6136	1.95942	4.77536
DEDD	22.7754	49.2003	-0.944378	-0.894412
DEDD2	68.3459	119.012	-0.619252	-0.859408
DEF6	142.841	72.4708	1.15742	2.99637
DEF8	31.4434	12.965	1.4476	1.5233
DEK	107.414	100.063	0.278369	0.295282
DENND1A	41.908	45.2111	0.0677008	0.0416804
DENND1B	35.8	106.712	-1.40166	-2.728
DENND1C	131.226	86.433	0.783559	1.4571
DENND2D	21.3716	57.1788	-1.23866	-1.44349
DENND3	194.866	61.168	1.8498	8.06053
DENND4A	402.095	943.117	-1.05341	-3.98011
DENND4B	109.329	180.512	-0.554399	-0.864846
DENND4C	36.9136	19.9461	1.0681	1.13452
DENND5A	55.9065	54.1868	0.223258	0.17599
DENND5B	100.921	68.814	0.735086	1.17187
DENND6A	73.795	89.0925	-0.105069	-0.0820893
DENND6B	0.528833	32.5786	-5.7316	-3.84896
DENR	79.0003	117.682	-0.402605	-0.479299
DEPDC5	54.4073	54.1868	0.196049	0.133254
DERA	27.3391	53.8544	-0.811632	-0.810385
DERL1	196.69	285.229	-0.356959	-0.537501
DERL2	42.1587	34.9056	0.446976	0.377159
DERL3	95.4201	13.6298	2.98234	11.404
DESI1	87.2228	55.849	0.813621	1.32213
DESI2	37.9153	38.5624	0.151632	0.0966879
DET1	5.30074	15.292	-1.36942	-0.656669
DEXI	2.65691	27.2596	-3.25078	-2.38762
DFFA	14.9554	25.5975	-0.621943	-0.343032
DFFB	10.0728	26.2623	-1.22359	-0.841133
DGAT1	31.6823	68.814	-0.943564	-1.05485
DGCR14	37.4557	32.911	0.364211	0.258648
DGCR8	16.8087	36.9002	-0.943811	-0.749132
DGKA	129.248	119.344	0.293965	0.322509
DGKD	199.39	328.113	-0.548839	-1.06951
DGKE	13.0092	49.5328	-1.74599	-1.91742
DGKQ	19.2303	27.9245	-0.344123	-0.181174
DGKZ	24.9624	125.993	-2.14693	-5.25138
DGUOK	122.742	80.4492	0.778282	1.44227
DHCR24	2.65773	18.6163	-2.65856	-1.16084
DHCR7	7.84711	43.5489	-2.3134	-2.60486
DHDDS	17.0443	41.8868	-1.12027	-1.06033
DHODH	11.1578	16.9542	-0.454819	-0.180175
DHPS	98.748	66.4869	0.74973	1.26418
DHRS1	24.6548	33.9083	-0.282872	-0.160682
DHRS7B	8.989	16.2893	-0.665636	-0.295005
DHTKD1	27.4249	0.332435	6.54571	3.98135
DHX15	190.742	278.248	-0.370519	-0.611792
DHX16	21.9578	109.039	-2.10929	-3.80107
DHX29	33.4627	25.9299	0.544085	0.436949
DHX30	55.3378	69.4788	-0.144259	-0.105085
DHX32	13.5519	12.3001	0.315749	0.132093
DHX33	10.0597	37.8976	-1.73676	-1.70353
DHX34	6.45554	16.9542	-1.2206	-0.575717
DHX35	24.5859	21.6083	0.360604	0.202702
DHX36	60.2851	55.1842	0.295325	0.252827
DHX37	68.4006	28.2569	1.45231	2.98701
DHX38	93.0155	75.4627	0.481359	0.619869
DHX40	182.588	111.698	0.8825	2.26172
DHX57	21.8561	40.8895	-0.749975	-0.576562
DHX58	17.2936	29.5867	-0.61662	-0.385065
DHX8	101.627	105.714	0.120542	0.10995
DHX9	279.925	419.2	-0.402791	-0.590755
DIABLO	83.4016	53.1895	0.829226	1.32933
DIAPH1	95.2093	142.947	-0.414296	-0.542418
DIAPH2	42.6862	37.2327	0.368604	0.295109
DIAPH3	0.737653	10.9703	-3.6247	-1.2584
DICER1	73.8124	47.5382	0.81009	1.24074
DIDO1	124.039	190.817	-0.448915	-0.700124
DIEXF	34.9952	39.2273	0.0233839	0.0118332
DIMT1	29.5663	26.5948	0.323871	0.203623
DIP2A	41.0584	6.31626	2.87386	4.99192
DIP2B	161.174	199.128	-0.13201	-0.140775
DIRAS1	35.944	0	9.39176	4.25346
DIRC2	179.221	22.938	3.13977	17.5282
DIS3	122.429	39.5597	1.80744	5.68718
DIS3L	29.9302	17.9515	0.924085	0.828071
DIS3L2	64.4493	51.5274	0.501497	0.552033
DKC1	77.7485	80.7816	0.117201	0.098069
DLAT	15.249	24.9326	-0.537498	-0.301303
DLD	48.4629	110.036	-1.00126	-1.6853
DLG1	42.9262	73.4681	-0.588001	-0.600286
DLGAP4	100.231	47.2057	1.25657	2.9498
DLL1	28.1395	3.98922	3.02425	3.30096
DLST	103.243	136.298	-0.221846	-0.221151
DMAP1	22.9711	20.6109	0.331099	0.181925
DMD	21.4568	4.32165	2.50288	2.68408
DMGDH	10.3525	0.332435	5.15129	2.22433
DMWD	20.5639	5.65139	2.0319	2.01922
DMXL1	129.684	259.299	-0.830658	-1.88438
DNAAF2	61.962	16.6217	2.08454	4.51609
DNAAF5	17.6583	12.3001	0.714184	0.397062
DNAJA1	378.84	13.6298	4.97118	47.0664
DNAJA2	135.285	274.259	-0.84232	-2.10022
DNAJA3	25.8506	41.5543	-0.516593	-0.389003
DNAJA4	11.0056	0.664869	4.22453	2.41852
DNAJB1	66.949	159.236	-1.08272	-2.06593
DNAJB12	89.2163	106.712	-0.0797413	-0.0675037
DNAJB14	49.9645	8.6433	2.70812	6.07055
DNAJB2	98.7986	82.7762	0.426994	0.5192
DNAJB4	32.5029	139.29	-1.92134	-5.02143
DNAJB5	1.79532	42.5516	-4.32905	-4.29727
DNAJB6	36.0667	98.0682	-1.25482	-2.052
DNAJB9	122.866	189.82	-0.4585	-0.632137
DNAJC1	49.4297	26.5948	1.05184	1.19424
DNAJC10	284.052	65.8221	2.27935	11.849
DNAJC11	26.8103	55.1842	-0.875786	-0.902564
[truncated: 6,630 more rows]

## Sheet: TableS2c
Differential gene expression analysis, mouse vs human, CD4+ T Cells
gene	tpm, human, CD4+ T Cells	tpm, mouse, CD4+ T Cells	log2(foldchange)	-log10(pvalue)*sign
A1BG	24.6507	0	6.7769	2.26157
AAAS	24.2204	61.2446	-1.11616	-1.09255
AACS	11.2763	69.7903	-2.44114	-3.57329
AAED1	62.5217	65.5175	0.144834	0.0877152
AAGAB	44.687	49.8502	0.0657343	0.0308057
AAK1	140.474	199.401	-0.30295	-0.267243
AAMDC	4.40266	41.3045	-2.997	-2.95897
AAMP	50.1728	236.433	-2.02193	-5.64665
AAR2	39.5657	41.3045	0.148693	0.0750977
AARS	47.3754	38.4559	0.513693	0.366216
AARS2	41.5638	24.213	0.976045	0.744858
AARSD1	41.0126	27.0616	0.804403	0.619738
AASDH	28.4112	15.6672	1.07324	0.717048
AASDHPPT	43.4007	47.0017	0.0982263	0.0519802
ABAT	24.304	0	6.73362	2.24041
ABCA1	24.3649	29.9101	-0.0772887	-0.0321696
ABCA2	30.6375	28.4858	0.313632	0.143622
ABCA3	3.045	61.2446	-4.12633	-6.51196
ABCA5	55.9624	1.42429	5.49726	2.84924
ABCA7	75.8846	89.7304	-0.027185	-0.0145413
ABCB10	14.6599	0	6.02984	1.80165
ABCB7	43.8741	85.4575	-0.754354	-0.767187
ABCB8	32.86	8.54575	2.16942	1.6716
ABCB9	15.769	82.609	-2.19908	-3.4353
ABCC1	107.809	128.186	-0.0454652	-0.0285856
ABCC10	19.9386	17.0915	0.428214	0.184718
ABCC4	16.8685	52.6988	-1.43966	-1.47167
ABCC5	8.49272	75.4875	-2.9314	-4.96302
ABCD1	11.8105	41.3045	-1.59432	-1.30599
ABCD2	38.299	0	7.40014	2.6764
ABCD3	28.7709	12.8186	1.36993	0.979558
ABCD4	47.0262	19.9401	1.44403	1.47102
ABCE1	83.4433	162.369	-0.751065	-0.857183
ABCF1	162.778	185.158	0.0174496	0.0111669
ABCF2	29.2848	61.2446	-0.866736	-0.770205
ABCF3	66.329	81.1847	-0.0919938	-0.0536362
ABCG1	174.481	207.947	-0.046411	-0.0312673
ABHD10	33.7598	29.9101	0.389118	0.218673
ABHD11	20.0995	99.7005	-2.10816	-3.78453
ABHD12	41.1912	52.6988	-0.147852	-0.0796841
ABHD13	97.2186	69.7903	0.684066	0.753157
ABHD14A	27.1338	5.69717	2.47191	1.69924
ABHD14B	150.548	18.5158	3.23066	7.74171
ABHD16A	42.2581	68.366	-0.47512	-0.335698
ABHD17A	13.1519	105.398	-2.8174	-5.71507
ABHD17B	39.3228	82.609	-0.849559	-0.836895
ABHD17C	2.7819	28.4858	-3.25514	-2.35245
ABHD18	49.9422	0	7.78459	2.97323
ABHD2	43.321	266.343	-2.41345	-7.82297
ABHD3	53.0593	0	7.86653	3.01595
ABHD5	27.12	28.4858	0.141485	0.0625196
ABHD8	5.94301	72.6389	-3.43314	-5.64214
ABI1	257.006	283.434	0.0674801	0.0547038
ABI2	32.9974	12.8186	1.57878	1.26319
ABI3	8.68028	42.7288	-2.09784	-2.10232
ABL1	17.9151	96.8519	-2.22106	-3.54823
ABL2	17.1714	25.6373	-0.383333	-0.169636
ABLIM1	408.891	959.973	-1.02764	-1.73412
ABR	66.0466	45.5774	0.744202	0.72388
ABRACL	128.837	175.188	-0.227669	-0.184718
ABT1	61.4465	82.609	-0.217177	-0.146579
ABTB1	67.3798	39.8802	0.971581	1.0178
ABTB2	7.81877	118.216	-3.7114	-9.61201
AC004381.6	1.26023	42.7288	-4.79383	-5.5152
AC025263.3	0.345102	196.552	-8.70398	-16.6434
AC068533.7	0	12.8186	-7.13777	-2.90346
ACAA2	97.4154	88.3061	0.342739	0.230679
ACAD11	33.8338	8.54575	2.18884	1.79431
ACAD8	23.0016	11.3943	1.23225	0.742422
ACAD9	39.2124	38.4559	0.237969	0.129755
ACADL	0	28.4858	-8.28978	-5.70652
ACADM	11.537	18.5158	-0.44306	-0.158751
ACADS	13.9372	34.183	-1.09085	-0.760445
ACADSB	35.2531	14.2429	1.51181	1.25613
ACADVL	70.0803	51.2745	0.660075	0.536434
ACAP1	173.434	259.221	-0.368995	-0.401232
ACAP2	134.973	116.792	0.421398	0.393886
ACAP3	13.1933	32.7587	-1.12106	-0.68472
ACAT1	27.3831	103.973	-1.7068	-2.71111
ACBD3	144.696	123.913	0.428246	0.420344
ACBD4	21.1363	18.5158	0.3928	0.169562
ACBD5	34.7911	85.4575	-1.08924	-1.31169
ACBD6	0.231423	88.3061	-8.12794	-9.65001
ACCS	21.9769	17.0915	0.566235	0.273682
ACD	40.4952	95.4276	-1.01338	-0.957576
ACER3	10.5227	25.6373	-1.08092	-0.635986
ACIN1	312.336	556.898	-0.628881	-0.9888
ACLY	43.2472	165.218	-1.71524	-3.41063
ACO1	8.29138	32.7587	-1.78365	-1.32825
ACO2	83.528	42.7288	1.17165	1.49406
ACOT13	8.51304	35.6073	-1.85067	-1.58302
ACOT7	19.2241	27.0616	-0.287109	-0.120443
ACOT8	32.5889	51.2745	-0.447893	-0.300751
ACOX1	23.3929	84.0333	-1.63533	-2.35245
ACOX3	17.5799	37.0316	-0.86191	-0.594524
ACP1	131.094	0	9.17771	4.10128
ACP2	21.9402	21.3644	0.242868	0.0978007
ACP5	23.267	209.371	-2.96488	-8.2297
ACP6	8.10705	25.6373	-1.41928	-0.833887
ACPP	0.568398	29.9101	-5.43269	-0.543978
ACSBG1	0.117743	15.6672	-6.46549	-2.81863
ACSF2	7.29824	17.0915	-1.02966	-0.446201
ACSF3	25.8029	9.97005	1.57622	1.07524
ACSL1	41.0044	38.4559	0.296753	0.168787
ACSL3	133.924	237.857	-0.621588	-0.853601
ACSL4	50.9799	136.732	-1.2108	-1.95936
ACSL5	47.8877	9.97005	2.47667	2.64409
ACSS1	63.0056	19.9401	1.8684	2.4232
ACSS2	13.2567	75.4875	-2.3315	-3.32961
ACTB	5044.74	12881.3	-1.13747	-2.74106
ACTG1	2969.11	21.3644	7.33407	42.7129
ACTL6A	27.7006	54.1231	-0.739556	-0.546254
ACTN1	107.641	591.081	-2.25559	-7.38694
ACTN4	96.0715	173.764	-0.636569	-0.546578
ACTR10	61.3963	132.459	-0.895293	-1.20006
ACTR1A	81.7823	125.338	-0.405436	-0.383247
ACTR1B	61.3043	133.883	-0.92133	-1.14892
ACTR2	118.543	217.917	-0.663672	-0.797394
ACTR3	273.17	1045.43	-1.72098	-5.04587
ACTR3B	18.5055	0	6.35619	2.00783
ACTR5	39.818	79.7604	-0.792576	-0.775939
ACTR6	42.1836	19.9401	1.28603	1.09797
ACTR8	32.3071	55.5474	-0.570685	-0.422899
ACVR1	36.1722	0	7.32091	2.64409
ACVR1B	11.6936	35.6073	-1.41597	-1.09187
ACVR1C	12.6559	1.42429	3.35042	1.05835
ACVR2A	32.5929	15.6672	1.27227	0.977379
ACVRL1	0	25.6373	-8.13778	-5.2714
ACYP1	18.6281	37.0316	-0.773643	-0.487533
ACYP2	52.7734	11.3943	2.41911	2.69279
ADA	23.9296	18.5158	0.590394	0.287471
ADAL	9.71645	28.4858	-1.31158	-0.793759
ADAM10	29.8208	76.9118	-1.14626	-1.26828
ADAM15	22.442	17.0915	0.596174	0.279667
ADAM17	29.7355	39.8802	-0.207988	-0.103358
ADAM19	92.1213	28.4858	1.90983	2.76531
ADAM8	59.2468	1.42429	5.60205	2.88867
ADAM9	15.1129	8.54575	1.02769	0.456867
ADAMTS10	13.3534	143.854	-3.2158	-9.04139
ADAMTS17	20.2025	4.27288	2.443	1.33526
ADAMTS6	2.8672	34.183	-3.34233	-2.87289
ADAP1	9.66929	22.7887	-1.0456	-0.555908
ADAR	200.193	125.338	0.88313	1.38974
ADARB1	30.105	2.84858	3.61373	2.22163
ADAT1	19.281	8.54575	1.37383	0.750377
ADAT2	35.962	34.183	0.279233	0.147519
ADAT3	23.652	81.1847	-1.56227	-2.1093
ADCK1	5.31779	28.4858	-2.19114	-1.60335
ADCK3	43.1116	14.2429	1.80393	1.81432
ADCK4	32.1609	25.6373	0.550755	0.307214
ADCK5	9.16261	24.213	-1.17386	-0.639965
ADCY3	21.9345	31.3344	-0.306521	-0.139221
ADCY7	78.0673	159.521	-0.814559	-1.01344
ADD1	94.8214	178.037	-0.698542	-0.937888
ADD3	286.648	141.005	1.2341	2.73806
ADGRE5	275.501	640.932	-1.0062	-2.22831
ADGRF3	22.3894	0	6.64446	2.15677
ADGRG1	10.1466	1.42429	3.0064	0.80454
ADGRL1	4.01532	48.4259	-3.45683	-4.01905
ADGRV1	15.7195	0	6.1268	1.85798
ADH5	36.2276	149.551	-1.8319	-3.41218
ADHFE1	30.3364	0	7.06772	2.47367
ADI1	60.2765	82.609	-0.241369	-0.168413
ADIPOR1	88.172	95.4276	0.0936072	0.0620736
ADIPOR2	32.2381	84.0333	-1.15357	-1.20181
ADK	128.877	45.5774	1.71193	3.2245
ADNP	139.313	143.854	0.154159	0.103032
ADNP2	58.5981	11.3943	2.56353	3.09939
ADO	27.9166	52.6988	-0.723249	-0.542022
ADORA2A	19.2265	29.9101	-0.427982	-0.200199
ADPGK	116.964	109.671	0.299993	0.253993
ADPRH	2.92319	44.1531	-3.71331	-4.21477
ADPRHL2	51.2795	34.183	0.785534	0.651932
ADPRM	43.2856	27.0616	0.885697	0.668817
ADRB2	26.5288	175.188	-2.51761	-5.80531
ADSL	45.3748	74.0632	-0.488988	-0.380541
ADSS	166.681	172.339	0.163471	0.132805
ADTRP	45.6956	1.42429	5.20271	2.48528
AEBP1	10.099	0	5.47182	1.43125
AEBP2	122.416	283.434	-1.0078	-1.71011
AEN	42.4203	39.8802	0.291707	0.145701
AES	885.68	628.113	0.710844	1.12091
AFAP1	50.6771	24.213	1.28032	1.28695
AFF1	176.387	354.649	-0.800265	-1.31342
AFF3	13.753	193.704	-3.60608	-1.83768
AFF4	252.89	236.433	0.301066	0.290994
AFG3L2	86.5123	51.2745	0.960959	1.17334
AFMID	1.48353	17.0915	-3.23953	-1.68477
AFTPH	28.1716	41.3045	-0.338725	-0.189341
AGA	25.9987	18.5158	0.706563	0.401232
AGAP2	44.1825	1.42429	5.17674	2.50217
AGAP3	54.3624	126.762	-1.00703	-1.0484
AGBL2	16.0663	0	6.15526	1.88092
AGBL3	18.3197	8.54575	1.29728	0.614946
AGBL5	11.1651	12.8186	0.00812261	0.00250069
AGFG1	98.3993	216.492	-0.930302	-1.53301
AGFG2	22.3236	15.6672	0.72711	0.38171
AGGF1	44.5149	86.8818	-0.76278	-0.698739
AGMAT	11.3307	0	5.64373	1.58533
AGO1	36.4937	58.396	-0.479965	-0.335463
AGO2	84.4627	86.8818	0.168207	0.114103
AGO3	66.9268	55.5474	0.473995	0.387557
AGO4	21.1535	0	6.54441	2.12998
AGPAT1	20.8782	48.4259	-0.989793	-0.802875
AGPAT2	5.12537	14.2429	-1.24936	-0.509021
AGPAT3	33.5729	142.429	-1.88971	-3.44078
AGPAT4	82.2419	17.0915	2.48477	3.70532
AGPAT5	39.0597	75.4875	-0.732176	-0.66768
AGPS	94.0346	95.4276	0.192299	0.137318
AGTPBP1	83.771	24.213	2.00002	3.19747
AGTRAP	24.2925	22.7887	0.29362	0.118439
AHCTF1	92.2516	75.4875	0.496555	0.470759
AHCYL1	20.4738	95.4276	-1.99401	-2.90346
AHCYL2	25.9175	113.943	-1.92035	-3.44737
AHDC1	24.114	78.3361	-1.50692	-1.90519
AHI1	69.4798	28.4858	1.49532	1.95492
AHNAK	909.743	215.068	2.29852	7.26919
AHSA1	61.7087	176.612	-1.30794	-2.18826
AHSA2	73.0525	34.183	1.29894	1.6222
AIF1	47.435	1.42429	5.25584	2.49704
AIFM1	15.4029	19.9401	-0.156932	-0.0570352
AIG1	24.4088	39.8802	-0.502303	-0.307214
AIM1	11.355	4.27288	1.60805	0.614262
AIM2	13.005	64.0932	-2.04695	-1.90082
AIMP1	279.053	89.7304	1.84405	4.43234
AIMP2	6.32955	59.8203	-3.03248	-4.39693
AIP	84.111	49.8502	0.957237	1.08372
AK2	24.9674	158.096	-2.45103	-6.16188
AK3	66.7342	49.8502	0.629413	0.552593
AK5	48.1202	0	7.73101	2.92124
AKAP1	32.7642	1.42429	4.73802	2.14366
AKAP10	59.0229	92.579	-0.440127	-0.372834
AKAP11	24.9609	17.0915	0.780335	0.381756
AKAP13	475.113	729.238	-0.408421	-0.573738
AKAP2	33.5948	21.3644	0.867439	0.530456
AKAP7	30.6491	0	7.07714	2.45808
AKAP8	147.308	199.401	-0.227796	-0.205263
AKAP8L	104.747	183.734	-0.599008	-0.750377
AKAP9	122.676	79.7604	0.829787	1.06853
AKIP1	11.8325	21.3644	-0.650796	-0.298595
AKIRIN1	202.258	71.2146	1.7184	4.04127
AKIRIN2	127.948	106.822	0.475276	0.457596
AKNA	217.529	230.735	0.128958	0.101484
AKR1A1	31.8062	190.855	-2.3637	-6.31984
AKR1B1	41.8059	27.0616	0.83242	0.656119
AKR7A2	37.0109	39.8802	0.103101	0.0479355
AKT1	43.6401	85.4575	-0.758438	-0.735917
AKT1S1	20.1871	24.213	-0.0511572	-0.0190831
AKT2	108.397	155.248	-0.308473	-0.286571
AKT3	57.0415	42.7288	0.630363	0.530865
AKTIP	27.79	25.6373	0.333852	0.164654
ALAD	19.4329	15.6672	0.523872	0.233699
ALAS1	17.7982	48.4259	-1.24319	-1.12599
ALCAM	31.5787	4.27288	3.10173	2.2273
ALDH16A1	38.6537	24.213	0.888151	0.674665
ALDH18A1	13.3169	19.9401	-0.356957	-0.136322
ALDH3A2	18.3001	55.5474	-1.39391	-1.38502
ALDH4A1	3.05149	56.9717	-3.98265	-5.59053
ALDH5A1	11.0376	4.27288	1.5841	0.598094
ALDH6A1	12.9027	5.69717	1.3878	0.585707
ALDH7A1	1.01013	11.3943	-3.3211	-1.32463
ALDH9A1	36.9223	106.822	-1.32915	-1.4515
ALDOC	19.8314	9.97005	1.19972	0.593504
ALG11	29.7705	22.7887	0.589192	0.324689
ALG12	24.7611	8.54575	1.73458	1.15271
ALG14	13.9884	31.3344	-0.933032	-0.51883
ALG2	36.1008	25.6373	0.709364	0.483549
ALG3	30.0611	14.2429	1.28676	0.95134
ALG5	61.9124	49.8502	0.521337	0.377356
ALG6	25.1315	9.97005	1.53915	1.03779
ALG8	17.8129	17.0915	0.268556	0.101737
ALKBH1	22.6606	89.7304	-1.77837	-2.39506
ALKBH2	15.9533	14.2429	0.362942	0.132717
ALKBH4	7.32342	74.0632	-3.12866	-5.09745
ALKBH5	198.94	166.642	0.466317	0.545385
ALKBH6	14.232	52.6988	-1.69754	-1.75732
ALKBH7	103.078	11.3943	3.38246	5.58493
ALKBH8	16.3083	32.7587	-0.802126	-0.441399
ALMS1	60.6004	5.69717	3.60647	3.61275
ALOX5AP	132.855	2.84858	5.76371	5.65914
ALPK1	21.7114	0	6.57013	2.10743
ALS2	13.6205	18.5158	-0.219756	-0.0774791
ALS2CL	13.8072	188.007	-3.57877	-11.0605
AMACR	5.84558	11.3943	-0.778733	-0.252037
AMBRA1	115.065	135.308	-0.0272939	-0.0180287
AMFR	49.0611	61.2446	-0.107274	-0.0599946
AMIGO1	35.2207	2.84858	3.83531	2.47862
AMIGO2	12.3164	32.7587	-1.19852	-0.843801
AMIGO3	59.2167	0	8.02852	3.15137
AMMECR1	40.7496	15.6672	1.58985	1.49594
AMMECR1L	1.12381	56.9717	-5.47833	-7.8393
AMN1	26.8066	22.7887	0.438282	0.224649
AMPD2	70.5497	18.5158	2.1504	2.54368
AMPD3	31.4829	11.3943	1.68814	1.29195
AMZ2	64.9462	175.188	-1.22123	-2.159
ANAPC1	46.8591	47.0017	0.209926	0.116763
ANAPC10	67.6335	34.183	1.18953	1.23696
ANAPC11	29.0379	133.883	-1.98759	-3.77916
ANAPC13	25.6812	27.0616	0.130827	0.0564073
ANAPC15	34.8154	21.3644	0.908795	0.661552
ANAPC16	215.604	118.216	1.0752	2.01594
ANAPC2	43.1952	78.3361	-0.65067	-0.589129
ANAPC4	33.8662	55.5474	-0.504206	-0.365525
ANAPC5	132.885	133.883	0.197798	0.151284
ANAPC7	28.8227	75.4875	-1.18814	-1.34656
ANGEL1	17.8299	15.6672	0.39679	0.160286
ANGEL2	63.0358	62.6689	0.215598	0.133624
ANK3	131.634	0	9.17103	4.03576
ANKAR	39.6339	0	7.44368	2.71093
ANKFY1	23.1648	47.0017	-0.814359	-0.608025
ANKH	81.5202	41.3045	1.19157	1.57017
ANKIB1	34.2932	74.0632	-0.90594	-0.930436
ANKLE2	70.4095	55.5474	0.547213	0.478283
ANKMY1	50.7264	0	7.81062	2.97323
ANKMY2	13.6805	35.6073	-1.19254	-0.836895
ANKRA2	78.2106	29.9101	1.59974	2.14312
ANKRD10	138.403	193.704	-0.273898	-0.257235
ANKRD11	174.396	358.922	-0.836135	-1.39837
ANKRD12	466.75	58.396	3.2029	12.9762
ANKRD13A	96.9432	233.584	-1.06094	-1.994
ANKRD13B	2.91263	12.8186	-1.95334	-0.792336
ANKRD13C	125.048	159.521	-0.147042	-0.10527
ANKRD13D	69.7653	9.97005	3.01761	3.88385
ANKRD16	5.7319	34.183	-2.40388	-2.07303
ANKRD17	160.216	149.551	0.304242	0.265008
ANKRD27	20.5437	28.4858	-0.24728	-0.105309
ANKRD28	67.393	24.213	1.68083	2.10232
ANKRD37	18.2545	14.2429	0.578018	0.237465
ANKRD39	22.55	11.3943	1.19364	0.702247
ANKRD40	29.6731	51.2745	-0.574683	-0.375375
ANKRD42	57.2095	1.42429	5.56069	2.73715
ANKRD46	32.9437	12.8186	1.56607	1.26684
ANKRD49	57.8246	0	7.98757	3.05739
ANKRD52	32.0847	38.4559	-0.0553616	-0.0251958
ANKRD54	42.4213	18.5158	1.39353	1.23589
ANKRD55	36.4972	11.3943	1.88626	1.55169
ANKRD60	0.892382	11.3943	-3.51998	-1.371
ANKRD9	1.58502	11.3943	-2.55571	-0.825915
ANKS1A	11.1699	19.9401	-0.615593	-0.261107
ANKS3	6.61616	27.0616	-1.85193	-1.26281
ANKZF1	111.357	17.0915	2.91338	5.72651
ANO10	13.8747	55.5474	-1.77253	-1.94621
ANO6	60.4163	155.248	-1.14448	-1.73921
ANO8	19.5352	12.8186	0.829221	0.410295
ANO9	91.5458	0	8.66788	3.64202
ANP32B	427.191	81.1847	2.59909	9.07132
ANP32E	142.379	165.218	-0.00405149	-0.00294092
ANTXR2	87.7163	42.7288	1.24712	1.66364
ANXA1	633.824	0	11.4487	6.28852
ANXA11	302.535	162.369	1.11013	2.19756
ANXA2	20.8765	44.1531	-0.876971	-0.604159
ANXA4	14.2449	0	5.96417	1.7575
ANXA5	129.622	75.4875	0.99423	1.2577
ANXA6	379.908	571.141	-0.371954	-0.389686
ANXA7	113.279	41.3045	1.66341	2.99624
AOAH	40.5316	0	7.49496	2.68014
AP000275.65	35.7216	24.213	0.780886	0.536194
AP002884.2	18.1328	82.609	-1.982	-3.01678
AP1AR	18.8961	21.3644	0.0366991	0.0129553
AP1B1	62.4884	242.13	-1.7422	-4.49567
AP1G1	242.41	160.945	0.797796	1.31562
AP1G2	69.8111	28.4858	1.50758	1.95827
AP1M1	69.4536	82.609	-0.0358682	-0.0200185
AP1S2	20.1174	58.396	-1.3162	-1.35665
AP2A1	34.1065	52.6988	-0.416231	-0.270835
AP2A2	62.374	91.1547	-0.337217	-0.26457
AP2B1	69.5563	109.671	-0.448063	-0.376572
AP2M1	109.1	28.4858	2.15053	4.01238
AP2S1	39.5459	138.156	-1.60229	-2.60117
AP3B1	123.797	103.973	0.458071	0.441387
AP3D1	81.5929	96.8519	-0.0383743	-0.0220713
AP3M1	43.6403	59.8203	-0.248357	-0.145014
AP3M2	117.612	19.9401	2.76548	5.60517
AP3S1	37.5242	28.4858	0.612924	0.401627
AP3S2	29.1752	37.0316	-0.144159	-0.0669367
AP4E1	25.9272	42.7288	-0.512586	-0.326444
AP4M1	4.68278	18.5158	-1.80821	-0.883821
AP4S1	12.3822	44.1531	-1.63139	-1.50867
AP5B1	23.1111	24.213	0.135499	0.0554393
AP5M1	61.1748	61.2446	0.205564	0.117463
AP5S1	16.6599	5.69717	1.75267	0.888416
AP5Z1	58.1213	29.9101	1.16504	1.20582
APAF1	20.9984	48.4259	-0.978828	-0.77192
APBA2	51.7604	1.42429	5.38341	2.69804
APBA3	33.8864	44.1531	-0.185736	-0.0922752
APBB1	62.253	0	8.09975	3.20805
APBB1IP	139.662	615.294	-1.92375	-6.51918
APBB3	35.0605	55.5474	-0.454459	-0.30559
APC	36.8691	88.3061	-1.05205	-1.15429
APEH	35.1206	79.7604	-0.972535	-1.06012
APEX1	148.904	82.609	1.0596	1.68138
APEX2	19.8624	17.0915	0.428102	0.186613
APH1A	79.5793	34.183	1.43173	1.9068
API5	162.732	216.492	-0.202804	-0.173831
APIP	27.4652	19.9401	0.677057	0.393886
APLP2	61.3021	123.913	-0.799414	-0.971225
APMAP	65.0884	31.3344	1.27281	1.41645
APOBEC1	0	11.3943	-6.96784	-2.60643
APOBEC3H	4.84925	123.913	-4.42466	-9.29817
APOBR	37.3943	7.12146	2.60056	2.31852
APOE	0.117743	18.5158	-6.7065	-3.24462
APOL6	198.902	0	9.77345	4.62952
APOLD1	19.1211	0	6.40327	2.03156
APOM	16.8442	0	6.21448	1.92221
APOOL	10.3296	15.6672	-0.372002	-0.118008
APOPT1	28.9121	101.125	-1.60094	-2.54303
APP	88.0552	24.213	2.07153	3.42958
APPBP2	58.1483	143.854	-1.09953	-1.70062
APPL1	50.4635	78.3361	-0.428581	-0.342008
APPL2	40.3645	37.0316	0.322744	0.179528
APRT	221.284	132.459	0.954627	1.1377
APTX	43.0036	32.7587	0.595822	0.423467
AQP3	226.625	41.3045	2.67398	5.69539
AQR	84.3509	66.9417	0.541704	0.501051
ARAF	124.621	138.156	0.0618433	0.0429258
ARAP1	119.694	131.035	0.0780296	0.0552025
ARAP2	174.773	55.5474	1.8646	4.34281
ARC	0.2168	39.8802	-7.81342	-5.80606
ARCN1	170.998	119.641	0.721787	0.939592
AREG	0	39.8802	-8.77521	-7.22137
AREL1	49.9398	32.7587	0.817793	0.698817
ARF1	433.907	347.527	0.530019	0.789029
ARF3	56.4227	170.915	-1.38871	-2.67188
ARF4	233.418	425.863	-0.645687	-0.662046
ARF5	124.236	296.253	-1.04077	-1.34659
ARF6	174.017	395.953	-0.971771	-1.66313
ARFGAP1	50.1923	92.579	-0.679514	-0.686982
ARFGAP2	62.931	47.0017	0.624661	0.536434
ARFGAP3	45.8749	15.6672	1.76738	1.81016
ARFGEF1	169.859	166.642	0.235813	0.212742
ARFGEF2	120.742	103.973	0.42404	0.411788
ARFIP2	50.5195	47.0017	0.30484	0.187761
ARFRP1	21.2687	109.671	-2.16671	-3.94213
ARGLU1	780.643	270.616	1.73535	5.56733
ARHGAP1	60.7743	105.398	-0.580977	-0.587365
ARHGAP10	30.411	31.3344	0.169051	0.0756009
ARHGAP12	53.3843	51.2745	0.270191	0.170222
ARHGAP15	636.434	491.381	0.57289	0.587365
ARHGAP17	58.7873	52.6988	0.366138	0.263205
ARHGAP18	9.50771	21.3644	-0.938296	-0.445146
ARHGAP21	28.6598	8.54575	1.95245	1.3471
ARHGAP25	89.1359	269.191	-1.37874	-2.97913
ARHGAP26	65.5438	41.3045	0.878031	0.863312
ARHGAP27	56.1068	95.4276	-0.561324	-0.53531
ARHGAP29	0	19.9401	-7.7752	-4.29131
ARHGAP30	113.355	291.98	-1.15255	-2.32209
ARHGAP31	43.533	153.824	-1.61723	-3.1377
ARHGAP33	14.4691	0	6.00413	1.78667
ARHGAP35	3.34217	29.9101	-3.00546	-2.29124
ARHGAP39	1.33005	32.7587	-4.58265	-4.0207
ARHGAP4	250.258	471.441	-0.703716	-1.18918
ARHGAP45	356.859	1388.69	-1.74893	-6.60183
ARHGAP5	46.0861	2.84858	4.22191	3.0147
ARHGAP9	270.823	282.01	0.153025	0.133649
ARHGDIA	302.043	320.466	0.130109	0.0953959
ARHGDIB	1946.95	1469.87	0.613652	1.01742
ARHGEF1	459.578	1175.04	-1.14291	-2.76602
ARHGEF10	2.8217	39.8802	-3.6341	-3.97711
ARHGEF11	11.8813	51.2745	-1.87346	-1.88479
ARHGEF2	64.3505	86.8818	-0.219506	-0.146845
ARHGEF3	168.387	499.927	-1.35418	-3.18957
ARHGEF40	14.6185	0	6.02611	1.78947
ARHGEF6	4.30117	125.338	-4.63702	-13.0404
ARHGEF7	88.85	68.366	0.595185	0.56672
ARHGEF9	11.1845	1.42429	3.18797	0.996591
ARID1A	124.144	307.647	-1.10448	-2.21579
ARID1B	146.779	180.885	-0.0951498	-0.0713161
ARID2	61.4435	42.7288	0.727211	0.633057
ARID3B	26.9836	55.5474	-0.843145	-0.709897
ARID4A	130.752	158.096	-0.0677752	-0.0477853
ARID4B	292.883	175.188	0.947288	1.69758
ARID5A	371.523	950.003	-1.14208	-2.49875
ARID5B	271.648	196.552	0.681647	0.840572
ARIH1	437.05	309.071	0.706794	1.23145
ARIH2	206.888	37.0316	2.69231	7.7853
ARL1	28.1131	74.0632	-1.18628	-1.38541
ARL13B	13.6392	17.0915	-0.1005	-0.0329965
ARL14EP	40.2565	17.0915	1.46189	1.15359
ARL15	52.5227	58.396	0.064155	0.0342004
ARL16	27.6073	21.3644	0.593753	0.320594
ARL2BP	70.0872	193.704	-1.25723	-2.38176
ARL4A	89.892	65.5175	0.673724	0.662025
ARL4C	747.899	623.84	0.480933	0.48746
ARL5A	65.2964	44.1531	0.781474	0.734476
ARL5B	43.5421	196.552	-1.95587	-4.63666
ARL5C	0	98.2762	-10.0764	-11.8039
ARL6IP1	153.203	250.675	-0.499689	-0.546949
ARL6IP4	218.857	41.3045	2.6152	8.01412
ARL6IP5	158.204	489.957	-1.41881	-3.22984
ARL6IP6	53.5888	65.5175	-0.063966	-0.030453
ARL8A	87.2562	69.7903	0.537787	0.500219
ARL8B	105.231	158.096	-0.382411	-0.370881
ARMC1	24.9197	54.1231	-0.903722	-0.68205
ARMC10	32.109	15.6672	1.2492	0.954095
ARMC2	16.5007	0	6.17932	1.89868
ARMC5	28.2527	11.3943	1.51357	1.0807
ARMC6	11.8178	7.12146	0.9308	0.344202
ARMC7	9.69284	132.459	-3.5653	-9.34401
ARMC8	96.8885	74.0632	0.594105	0.51113
ARMC9	0.580589	15.6672	-4.39355	-2.11742
ARMCX2	1.49572	38.4559	-4.39471	-4.49125
ARMCX3	32.6831	11.3943	1.72367	1.36591
ARMCX4	17.5629	14.2429	0.512212	0.205421
ARMCX5	24.7807	69.7903	-1.28295	-1.43164
ARMCX6	32.7261	11.3943	1.74181	1.39635
ARMT1	17.4118	18.5158	0.114125	0.0413065
ARNT	31.8216	122.489	-1.71824	-2.68136
ARNTL	165.56	72.6389	1.3952	2.69377
ARPC1A	60.3546	115.368	-0.721992	-0.802265
ARPC1B	185.794	692.206	-1.67902	-4.06018
ARPC2	447.812	687.933	-0.407908	-0.543036
ARPC3	376.486	761.996	-0.803681	-1.47615
ARPC4	153.326	283.434	-0.675565	-0.969002
ARPC5L	76.332	95.4276	-0.112804	-0.0710694
ARPP19	109.875	169.491	-0.414833	-0.427266
ARRB1	31.2889	75.4875	-1.06706	-1.1492
ARRB2	218.215	236.433	0.0958025	0.0765192
ARRDC1	37.9764	96.8519	-1.14599	-1.46737
ARRDC2	204.707	32.7587	2.86023	7.37478
ARRDC3	502.467	310.496	0.90804	1.56852
ARRDC4	10.1736	5.69717	1.04613	0.342691
ARSA	46.3319	22.7887	1.22273	1.11794
ARSB	12.0306	9.97005	0.476683	0.159411
ARSG	24.8667	17.0915	0.756592	0.421946
ARSK	10.6876	14.2429	-0.180153	-0.0547038
ARV1	6.60077	31.3344	-2.00864	-1.54774
ASAH1	48.6705	44.1531	0.352599	0.225093
ASAP1	14.6355	279.161	-4.06371	-18.2079
ASB1	16.7816	14.2429	0.436287	0.173064
ASB13	3.26829	52.6988	-3.79144	-4.97182
ASB6	30.8568	39.8802	-0.158764	-0.077536
ASB7	19.5181	5.69717	1.97351	1.1077
ASB8	58.5	12.8186	2.39354	2.8891
ASCC1	39.7677	39.8802	0.19492	0.0993234
ASCC2	69.1119	88.3061	-0.145124	-0.0940084
ASCC3	129.014	121.065	0.306998	0.249759
ASF1A	40.5937	91.1547	-0.950721	-1.07616
ASF1B	4.61703	12.8186	-1.26855	-0.486259
ASH1L	46.2493	0	7.66978	2.87777
ASH2L	30.0384	58.396	-0.748338	-0.63574
ASIP	0	377.437	-12.0177	-19.0995
ASNA1	21.6366	42.7288	-0.773605	-0.561223
ASNS	13.3258	5.69717	1.45669	0.608025
ASPSCR1	12.798	109.671	-2.8792	-6.30803
ASRGL1	0.565966	31.3344	-5.6198	-4.67448
ASTE1	66.1823	11.3943	2.75412	3.65663
ASTN2	10.8345	0	5.57173	1.54464
ASUN	23.8104	89.7304	-1.69694	-2.39078
ASXL1	321.93	226.462	0.711284	1.00294
ASXL2	60.0533	91.1547	-0.3941	-0.325311
ATAD1	57.8845	122.489	-0.872274	-1.04657
ATAD2	140.14	230.735	-0.515396	-0.575494
ATAD2B	64.0433	52.6988	0.491391	0.39776
ATAD5	12.9263	5.69717	1.37626	0.545651
ATAT1	9.11881	12.8186	-0.266309	-0.0790748
ATE1	38.4532	72.6389	-0.711681	-0.639852
ATF1	54.115	75.4875	-0.265262	-0.174101
ATF2	95.4934	121.065	-0.13529	-0.0863548
ATF3	108.376	7.12146	4.14131	5.65914
ATF4	428.175	957.125	-0.94743	-1.81944
ATF5	42.4302	7.12146	2.77504	2.52128
ATF6	65.294	27.0616	1.47843	1.79643
ATF6B	20.1449	17.0915	0.439948	0.190888
ATF7IP	157.697	143.854	0.338815	0.304434
ATF7IP2	79.487	0	8.46363	3.47627
ATG10	18.901	24.213	-0.151416	-0.0568228
ATG101	17.7406	121.065	-2.56598	-5.79082
ATG12	116.18	89.7304	0.578728	0.63887
ATG13	113.86	51.2745	1.35718	2.19237
ATG14	104.412	21.3644	2.48993	3.92845
ATG16L1	243.911	89.7304	1.65178	0.712081
ATG16L2	29.8759	72.6389	-1.08185	-1.17416
ATG2A	96.0068	158.096	-0.509186	-0.520243
ATG2B	6.56503	132.459	-4.12374	-12.0824
ATG3	89.1772	85.4575	0.271081	0.210627
ATG4B	61.9167	66.9417	0.0904723	0.052661
ATG4C	11.7286	5.69717	1.27087	0.485559
ATG4D	86.3286	34.183	1.54066	2.21409
ATG7	41.2182	29.9101	0.672529	0.461464
ATG9A	50.5625	24.213	1.26754	1.28517
ATG9B	15.1308	0	6.0719	1.82098
ATHL1	52.275	38.4559	0.664741	0.486849
ATIC	64.7287	136.732	-0.865037	-1.15256
ATL2	94.037	75.4875	0.525357	0.520243
ATL3	54.6632	155.248	-1.2879	-2.15677
ATM	246.523	81.1847	1.80501	3.51518
ATMIN	28.4883	7.12146	2.20514	1.65421
ATOX1	39.4534	86.8818	-0.934098	-0.956458
ATP10A	41.9896	31.3344	0.620734	0.367199
ATP10D	2.30773	95.4276	-5.05002	-10.6135
ATP11A	35.9497	52.6988	-0.346492	-0.219151
ATP11B	262.735	385.983	-0.347113	-0.409505
ATP11C	36.0058	31.3344	0.407729	0.240082
ATP13A1	58.3634	78.3361	-0.211989	-0.139308
ATP13A2	34.6245	45.5774	-0.187645	-0.0956445
ATP13A3	72.0302	142.429	-0.780245	-0.992197
ATP1A1	248.453	253.524	0.179379	0.154974
ATP1B1	19.8451	200.825	-3.1267	-1.96579
ATP1B3	97.2953	410.196	-1.85313	-3.45382
ATP23	10.469	12.8186	-0.0919134	-0.0233118
ATP2A2	156.702	145.278	0.315668	0.302566
ATP2A3	136.741	146.702	0.110876	0.0747433
ATP2B1	203.481	163.794	0.527186	0.608555
ATP2B4	113.247	27.0616	2.27781	4.11402
ATP2C1	57.9484	47.0017	0.509875	0.391575
ATP5A1	153.429	962.822	-2.4413	-12.7522
ATP5B	374.135	760.572	-0.811206	-1.59216
ATP5C1	227.926	370.316	-0.491939	-0.66609
ATP5D	279.832	592.506	-0.869876	-1.62868
ATP5F1	145.03	170.915	-0.0270294	-0.0180287
ATP5G1	8.15575	66.9417	-2.82303	-4.36193
ATP5G2	196.937	35.6073	2.67775	7.7236
ATP5G3	94.8474	371.74	-1.76167	-5.2709
ATP5I	98.9648	34.183	1.74239	2.63577
ATP5J	124.491	320.466	-1.15413	-2.36663
ATP5J2	64.675	202.25	-1.42661	-2.58708
ATP5S	24.4241	12.8186	1.12783	0.68205
ATP5SL	15.4224	55.5474	-1.64538	-1.77823
ATP6AP1	62.0661	142.429	-0.979229	-1.30091
ATP6AP2	108.143	143.854	-0.197211	-0.152321
ATP6V0A2	39.9222	69.7903	-0.598315	-0.472628
ATP6V0B	46.2863	74.0632	-0.472739	-0.313622
ATP6V0C	557.658	368.892	0.809315	1.2599
ATP6V0D1	64.3835	85.4575	-0.200004	-0.131054
ATP6V0E1	98.7409	223.614	-0.962692	-1.48536
ATP6V0E2	93.2414	0	8.68855	3.68456
ATP6V1A	22.6897	52.6988	-0.997551	-0.819781
ATP6V1B2	50.4481	52.6988	0.146737	0.0825743
ATP6V1C1	19.7935	45.5774	-0.977309	-0.694686
ATP6V1D	77.9853	180.885	-1.01403	-1.5004
ATP6V1E1	84.5133	129.611	-0.409872	-0.379918
ATP6V1E2	10.34	0	5.49031	1.48536
ATP6V1F	93.0487	45.5774	1.23752	1.67446
ATP6V1G1	449.738	71.2146	2.86831	12.9536
ATP6V1G2	0.117743	19.9401	-6.81341	-3.45382
ATP6V1H	99.7415	143.854	-0.321701	-0.287689
ATP7A	41.4935	42.7288	0.169622	0.0843001
ATP8A1	116.909	105.398	0.354368	0.318216
ATP8A2	0.33048	21.3644	-6.02579	-3.35839
ATP8B2	130.535	66.9417	1.1739	1.9465
ATP8B4	0.11368	58.396	-8.36361	-7.37344
ATP9B	152.757	103.973	0.761257	1.05521
ATPAF1	16.3797	15.6672	0.274562	0.100195
ATPAF2	33.7938	47.0017	-0.278217	-0.153862
ATPIF1	306.883	85.4575	2.05438	6.69591
ATR	60.3432	54.1231	0.361821	0.250421
ATRAID	96.0045	47.0017	1.24006	1.79126
ATRN	17.8064	47.0017	-1.1943	-1.04595
ATRX	155.024	109.671	0.706275	0.91613
ATXN1	293.914	79.7604	2.09195	5.29018
ATXN10	64.5785	182.309	-1.27735	-2.15637
ATXN1L	30.4111	11.3943	1.6313	1.26672
ATXN2	56.7239	69.7903	-0.0954515	-0.0551093
ATXN2L	257.982	320.466	-0.104425	-0.0859483
ATXN7	316.107	79.7604	2.19268	7.014
ATXN7L1	107.376	206.522	-0.728064	-0.987589
ATXN7L2	26.2195	24.213	0.315886	0.148394
ATXN7L3	57.4685	96.8519	-0.546955	-0.520243
ATXN7L3B	139.48	89.7304	0.844022	1.1134
AUH	58.6145	113.943	-0.753269	-0.809848
AUP1	123.295	323.314	-1.17957	-2.59977
AURKAIP1	44.4326	129.611	-1.32891	-1.89111
AVEN	21.2193	96.8519	-1.9811	-3.31468
AVL9	38.1585	141.005	-1.67505	-2.82916
AVPI1	25.3093	18.5158	0.681507	0.340036
AXDND1	16.5445	0	6.20487	1.86639
AXIN1	30.7342	122.489	-1.79053	-3.09931
AXIN2	26.2934	65.5175	-1.10444	-1.1693
AZI2	43.9529	182.309	-1.83516	-4.13572
AZIN1	467.696	256.373	1.08255	2.14328
B2M	12387.9	9942.99	0.52645	0.950242
B3GALNT2	7.85771	34.183	-1.93613	-1.5827
B3GALT4	11.2324	18.5158	-0.537714	-0.210282
B3GALT6	6.22236	12.8186	-0.825164	-0.29338
B3GAT3	56.5916	72.6389	-0.151397	-0.0920641
B3GLCT	27.2256	5.69717	2.47009	1.73988
B3GNT2	170.624	233.584	-0.246267	-0.225138
B3GNTL1	9.6994	22.7887	-1.00352	-0.513471
B4GALNT1	0.334543	357.497	-10.1286	-18.0467
B4GALT1	216.898	253.524	-0.00967572	-0.00639379
B4GALT3	49.0067	49.8502	0.185737	0.104572
B4GALT4	25.0576	0	6.77653	2.2506
B4GALT5	13.3436	25.6373	-0.722376	-0.369685
B4GALT7	23.5878	17.0915	0.664787	0.348687
B9D2	80.743	35.6073	1.38171	1.76642
BACH1	80.233	65.5175	0.499401	0.453268
BACH2	263.976	381.71	-0.330058	-0.313669
BAD	58.4411	9.97005	2.75404	3.09522
BAG1	85.7423	168.067	-0.760466	-0.995314
BAG2	18.3188	4.27288	2.30491	1.23015
BAG3	153.886	71.2146	1.32381	2.43404
BAG4	34.5514	39.8802	-0.00111233	-0.000617816
BAG5	94.6482	35.6073	1.61867	2.2508
BAG6	125.889	205.098	-0.494857	-0.58263
BAHD1	22.8075	24.213	0.117033	0.0482227
BAIAP2	13.8243	96.8519	-2.59379	-5.06351
BAK1	15.2803	62.6689	-1.82961	-2.30642
BAMBI	2.79083	101.125	-5.02644	-10.9075
BANF1	58.0419	196.552	-1.54434	-3.27904
BANP	53.6375	89.7304	-0.539506	-0.488519
BAP1	60.3203	79.7604	-0.199069	-0.130002
BASP1	1.70846	17.0915	-3.08609	-1.67289
BATF	55.202	113.943	-0.829014	-0.759545
BAX	41.0921	162.369	-1.76503	-3.61275
BAZ1A	207.588	113.943	1.07529	2.0456
BAZ1B	42.5594	108.246	-1.14451	-1.58476
BAZ2A	239.916	638.083	-1.20614	-2.89479
BAZ2B	33.6502	78.3361	-1.00287	-1.08589
BBS12	10.3619	1.42429	3.07051	0.926496
BBS2	86.1964	18.5158	2.4176	3.56085
BBS4	11.6206	1.42429	3.24963	1.0282
BBS9	17.0173	44.1531	-1.14593	-0.75048
BBX	117.831	86.8818	0.646332	0.735785
BCAP29	26.4679	38.4559	-0.336568	-0.178932
BCAP31	35.4349	105.398	-1.35908	-2.03804
BCAR3	13.998	4.27288	1.92287	0.789274
BCAS2	317.509	289.131	0.341424	0.348912
BCAS3	45.9861	66.9417	-0.331849	-0.231345
BCAT2	9.02375	103.973	-3.31063	-6.9692
BCCIP	146.221	202.25	-0.266951	-0.201737
BCDIN3D	8.66166	11.3943	-0.183051	-0.0512512
BCKDHA	72.1641	12.8186	2.69633	3.81922
BCKDHB	24.2026	18.5158	0.597793	0.30974
BCKDK	16.3244	45.5774	-1.26785	-1.02758
BCL10	44.8892	213.644	-2.03182	-5.16257
BCL11B	163.368	526.988	-1.48097	-4.42567
BCL2	209.064	156.672	0.625836	0.891061
BCL2L1	33.3911	32.7587	0.235869	0.117463
BCL2L11	99.5201	502.775	-2.12585	-5.71507
BCL2L12	11.9705	24.213	-0.818339	-0.428291
BCL2L13	49.4509	84.0333	-0.547108	-0.475206
BCL3	137.973	68.366	1.22348	1.84805
BCL6	100.644	99.7005	0.222108	0.170935
BCL7A	7.79929	27.0616	-1.61351	-0.990929
BCL7B	125.895	109.671	0.411614	0.40324
BCL7C	32.35	7.12146	2.38288	1.86198
BCL9	13.4517	12.8186	0.300292	0.0965067
BCL9L	269.147	0	10.2185	5.04195
BCLAF1	642.04	142.429	2.37785	8.95789
BCOR	18.6184	199.401	-3.2211	-11.0213
BCORL1	9.53046	34.183	-1.60843	-1.20506
BCR	35.8279	28.4858	0.536578	0.338959
BCS1L	6.91257	14.2429	-0.8181	-0.305906
BDH1	22.9553	81.1847	-1.62604	-2.15245
BDH2	26.0483	0	6.85193	2.30503
BDP1	75.2898	34.183	1.34958	1.69666
BECN1	169.98	146.702	0.423092	0.471588
BEND3	1.59478	34.183	-4.18874	-4.03576
BET1	19.687	18.5158	0.302913	0.121265
BEX3	48.5559	15.6672	1.83538	1.88672
BFAR	64.5073	85.4575	-0.189068	-0.114787
BHLHB9	2.41898	17.0915	-2.58291	-1.24096
BHLHE40	420.215	196.552	1.31825	0.582934
BICD1	16.2887	1.42429	3.7264	1.35126
BICD2	12.2353	37.0316	-1.39187	-1.12115
BICDL1	34.332	37.0316	0.0865458	0.0359695
BID	28.8675	15.6672	1.11324	0.66932
BIK	12.8734	5.69717	1.37545	0.543978
BIN3	106.61	42.7288	1.52888	2.38165
BIRC2	286.203	4.27288	6.27708	10.2114
BIRC3	216.371	179.461	0.478177	0.59929
BIRC5	0.561903	17.0915	-4.73871	-2.52069
BIRC6	167.387	338.982	-0.808935	-1.44888
BIRC8	0	72.6389	-9.64028	-10.2114
BIVM	5.57273	11.3943	-0.861719	-0.270199
BLCAP	86.4895	31.3344	1.67728	2.55079
BLM	9.86664	24.213	-1.07327	-0.600583
BLMH	36.6909	48.4259	-0.197295	-0.0962449
BLOC1S2	81.4045	22.7887	2.03927	2.92376
BLOC1S4	49.7001	31.3344	0.874084	0.772284
BLOC1S6	211.275	42.7288	2.50869	5.5941
BLVRA	38.5944	31.3344	0.508904	0.33069
BLVRB	12.3748	9.97005	0.530238	0.173412
BLZF1	23.8283	14.2429	0.964437	0.506866
BMP2K	5.68971	86.8818	-3.68179	-7.2216
BMS1	63.7474	96.8519	-0.395779	-0.272179
BMT2	57.5409	105.398	-0.666282	-0.711499
BNIP1	35.1045	7.12146	2.50597	2.12893
BNIP2	242.399	109.671	1.35449	3.05683
BNIP3	16.547	5.69717	1.75016	0.892869
BNIP3L	159.076	188.007	-0.0372345	-0.0252949
BOD1L1	82.7618	58.396	0.710519	0.739904
BOLA1	19.5237	18.5158	0.302151	0.111271
BOLA3	32.6846	41.3045	-0.129618	-0.0625553
BOLL	0	28.4858	-8.28978	-5.70652
BORA	11.0489	41.3045	-1.6652	-1.42292
BORCS5	171.35	41.3045	2.26938	4.1466
BORCS6	10.6721	22.7887	-0.885255	-0.423231
BPGM	97.0345	56.9717	0.975449	1.16179
BPHL	11.4695	34.183	-1.3556	-1.02229
BPNT1	10.5479	49.8502	-2.02613	-2.2586
BPTF	84.1333	170.915	-0.815314	-1.10362
BRAF	180.117	105.398	0.980657	1.67625
BRAP	110.689	188.007	-0.560584	-0.655975
BRAT1	12.8385	32.7587	-1.15003	-0.792406
BRCA2	27.5772	15.6672	1.03341	0.672655
BRCC3	21.8932	56.9717	-1.16681	-1.15888
BRD1	100.998	253.524	-1.12251	-2.15273
BRD2	340.351	96.8519	2.02246	5.31166
BRD3	36.8349	37.0316	0.202901	0.104539
BRD4	162.481	266.343	-0.505681	-0.63887
BRD7	151.997	136.732	0.367344	0.348179
BRD8	12.0169	65.5175	-2.21976	-2.67632
BRD9	115.523	99.7005	0.416533	0.390111
BRDT	0.341039	18.5158	-5.34025	-2.64864
BRE	101.54	146.702	-0.317201	-0.28517
BRF1	49.4745	139.581	-1.28893	-2.18027
BRF2	40.0918	9.97005	2.21489	2.13387
BRI3	61.9119	133.883	-0.911317	-1.19848
BRI3BP	8.05669	47.0017	-2.32518	-2.5847
BRIX1	52.4937	59.8203	0.022093	0.0103034
BRK1	118.686	240.705	-0.806497	-1.18343
BRMS1	84.4952	78.3361	0.317241	0.251849
BRMS1L	29.5162	37.0316	-0.115151	-0.0543618
BRPF1	33.647	148.126	-1.91684	-3.89457
BRPF3	40.6447	41.3045	0.180407	0.0942015
BRWD1	109.366	108.246	0.222076	0.175172
BRWD3	31.6283	28.4858	0.348175	0.168413
BSCL2	48.3101	71.2146	-0.343476	-0.242119
BSDC1	132.337	102.549	0.572273	0.590716
BSG	94.823	338.982	-1.6224	-4.13974
BST2	8.19875	149.551	-4.00899	-11.8833
BTAF1	227.661	72.6389	1.85559	4.54306
BTBD1	48.3028	41.3045	0.438647	0.303986
BTBD10	31.6331	39.8802	-0.135601	-0.0646689
BTBD11	93.1048	34.183	1.65341	2.61467
BTBD19	14.8872	41.3045	-1.28093	-0.960007
BTBD2	32.1706	32.7587	0.173296	0.0803806
BTBD6	24.6815	55.5474	-0.951045	-0.736232
BTBD7	24.3301	94.0033	-1.74104	-2.56095
BTBD9	171.024	85.4575	1.20675	2.02553
BTD	32.843	35.6073	0.088564	0.0413416
BTF3	1258	317.617	2.19246	10.3294
BTF3L4	16.1759	156.672	-3.08263	-8.30908
BTG1	8789.6	5314.04	0.939559	2.08779
BTG2	2266.32	791.907	1.72803	6.15917
BTLA	16.7013	149.551	-2.92173	-6.43914
BTRC	40.3752	18.5158	1.32559	1.15359
BUB3	127.211	155.248	-0.0720706	-0.0500129
BUD13	41.3512	38.4559	0.317127	0.18819
BUD31	252.59	239.281	0.286097	0.297262
BYSL	3.37305	62.6689	-4.06039	-6.42445
BZW1	296.116	282.01	0.27367	0.219382
BZW2	92.9207	462.895	-2.1128	-7.47038
C10orf128	14.7207	1.42429	3.57706	1.23041
C10orf2	9.85528	21.3644	-0.915649	-0.452202
C10orf54	139.489	931.487	-2.51978	-8.04614
C10orf76	38.808	8.54575	2.39423	2.24041
C10orf88	6.12737	15.6672	-1.13204	-0.486259
C11orf1	46.2891	8.54575	2.64518	2.65693
C11orf24	8.14762	31.3344	-1.72801	-1.32548
C11orf31	112.031	55.5474	1.22421	1.90206
C11orf49	13.4533	4.27288	1.85447	0.749111
C11orf54	11.1544	0	5.60929	1.56346
C11orf57	35.509	31.3344	0.384183	0.200518
C11orf58	256.093	96.8519	1.61025	4.07637
C11orf65	50.884	0	7.82633	2.96156
C11orf68	10.0542	45.5774	-1.97151	-2.04189
C11orf80	13.9891	0	5.94404	1.75908
C11orf84	3.72708	31.3344	-2.83777	-2.29124
C12orf10	40.1525	38.4559	0.263592	0.14104
C12orf29	48.6478	1.42429	5.30051	2.67414
C12orf4	31.3402	7.12146	2.34005	1.70169
C12orf42	24.4114	0	6.75276	2.21622
C12orf43	24.1255	48.4259	-0.797348	-0.580796
C12orf45	21.4473	62.6689	-1.35582	-1.40182
C12orf49	37.521	52.6988	-0.278072	-0.168047
C12orf57	292.771	183.734	0.882047	1.54688
C12orf65	50.3068	25.6373	1.17352	1.11854
C12orf66	30.3754	19.9401	0.818908	0.537651
C12orf73	27.3791	7.12146	2.16158	1.5636
C12orf75	54.913	2.84858	4.48075	3.35383
C14orf1	40.5643	51.2745	-0.125732	-0.0662437
C14orf119	32.9997	82.609	-1.11992	-1.35065
C14orf159	60.6589	19.9401	1.81837	2.23836
C14orf166	352.277	283.434	0.525939	0.700608
C14orf169	53.3412	56.9717	0.111742	0.0634881
C14orf2	158.854	206.522	-0.173394	-0.142354
C14orf28	23.1868	11.3943	1.24003	0.75355
C14orf37	328.646	0	10.4982	5.34651
C14orf80	43.2163	9.97005	2.3263	2.32515
C14orf93	11.3209	4.27288	1.62289	0.627729
C15orf39	79.1392	106.822	-0.220369	-0.157826
C15orf40	17.6821	51.2745	-1.34002	-1.28941
C15orf41	10.7395	17.0915	-0.468714	-0.177999
C15orf57	49.1084	17.0915	1.74527	1.71496
C15orf61	42.8459	29.9101	0.720193	0.491602
C16orf13	58.6867	71.2146	-0.0636484	-0.0358185
C16orf52	10.0558	9.97005	0.214576	0.0620736
C16orf54	365.154	42.7288	3.30076	13.0321
C16orf58	33.9919	15.6672	1.31539	1.01628
C16orf62	20.4244	28.4858	-0.265749	-0.111898
C16orf70	17.4645	64.0932	-1.65823	-2.02442
C16orf72	254.167	244.978	0.260476	0.263265
C16orf87	66.9959	156.672	-1.01352	-1.54406
C16orf91	15.1178	65.5175	-1.90283	-2.37637
C17orf107	19.6438	2.84858	3.0252	1.31505
C17orf62	52.8197	55.5474	0.147678	0.0753195
C17orf67	15.7374	0	6.12199	1.8649
C17orf75	15.2299	15.6672	0.155086	0.0532892
C17orf80	3.99344	19.9401	-2.07994	-1.17205
C17orf89	40.4214	37.0316	0.337052	0.19739
C18orf21	85.1919	9.97005	3.29801	4.95041
C18orf25	74.8253	68.366	0.341627	0.260531
C18orf32	109.251	109.671	0.209277	0.154992
C18orf54	1.93582	14.2429	-2.6316	-1.20936
C18orf8	68.3988	102.549	-0.376685	-0.306854
C19orf12	18.1198	74.0632	-1.81094	-2.44726
C19orf24	83.1242	29.9101	1.69178	2.04209
C19orf25	16.3553	61.2446	-1.69152	-1.9188
C19orf38	2.25574	103.973	-5.34583	-13.0273
C19orf43	422.418	394.529	0.308968	0.336376
C19orf47	15.0171	19.9401	-0.217189	-0.0769347
C19orf52	21.4806	29.9101	-0.281683	-0.126815
C19orf53	261.224	289.131	0.0620316	0.0502011
C19orf54	15.7066	24.213	-0.404946	-0.177068
C19orf60	75.1718	55.5474	0.650618	0.611597
C19orf66	110.431	44.1531	1.52821	2.54844
C19orf70	49.1259	133.883	-1.24434	-1.64134
C1D	17.7553	76.9118	-1.89979	-2.61152
C1GALT1	65.8322	58.396	0.387514	0.293937
C1GALT1C1	26.2269	41.3045	-0.444731	-0.262845
C1QBP	144.586	139.581	0.264144	0.214638
C1RL	26.7595	0	6.88049	2.34917
C1orf122	20.9894	32.7587	-0.425033	-0.21165
C1orf123	21.5156	37.0316	-0.568466	-0.343043
C1orf131	27.9443	29.9101	0.104751	0.044232
C1orf159	6.10462	12.8186	-0.853174	-0.303962
C1orf162	176.416	0	9.60782	4.43584
C1orf174	33.3684	17.0915	1.17463	0.910164
C1orf21	4.86627	25.6373	-2.24334	-1.2231
C1orf228	79.5892	0	8.45849	3.49488
C1orf27	57.3891	18.5158	1.84161	2.24438
C1orf35	41.3511	95.4276	-1.00431	-1.20043
C1orf43	128.111	12.8186	3.52918	7.23805
C1orf50	25.7981	9.97005	1.57147	1.06604
C1orf52	129.332	84.0333	0.829291	1.12328
C1orf53	0.231423	21.3644	-6.0974	-3.40705
C1orf54	10.3506	1.42429	3.05209	0.912633
C20orf194	14.0403	29.9101	-0.864354	-0.493518
C20orf196	18.6371	15.6672	0.45975	0.193709
C20orf27	28.8341	32.7587	0.0241305	0.00979795
C21orf2	44.4968	18.5158	1.47429	1.39091
C21orf91	83.7647	169.491	-0.804707	-1.04205
C22orf29	37.3587	24.213	0.832819	0.599364
C22orf39	63.6779	56.9717	0.362153	0.25677
C2CD2L	25.8379	42.7288	-0.507009	-0.314118
C2CD3	44.1681	48.4259	0.0771682	0.0395137
C2CD5	37.8865	39.8802	0.137979	0.0676538
C2orf42	99.7301	51.2745	1.1652	1.64969
C2orf47	73.3125	22.7887	1.8852	2.43476
C2orf49	46.2778	21.3644	1.31974	1.19169
C2orf68	31.6649	38.4559	-0.065831	-0.0302439
C2orf69	35.3903	1.42429	4.84228	2.24767
C2orf81	27.155	0	6.92747	2.32879
C3orf14	2.88589	32.7587	-3.25263	-2.53003
C3orf18	10.3067	2.84858	2.03682	0.690464
C3orf38	83.1547	38.4559	1.32083	1.83354
C3orf58	30.3404	27.0616	0.375526	0.194607
C4orf3	172.721	52.6988	1.92314	4.52607
C4orf32	50.5642	24.213	1.27317	1.30599
C4orf33	29.8192	42.7288	-0.309683	-0.173124
C4orf36	11.8787	1.42429	3.24545	1.01667
C4orf46	12.5439	11.3943	0.359349	0.116521
C4orf47	10.0444	2.84858	2.03707	0.700781
C4orf48	15.8542	1.42429	3.67911	1.2577
C5orf15	43.3592	112.519	-1.17195	-1.68622
C5orf22	20.6663	19.9401	0.2656	0.108297
C5orf24	59.2534	85.4575	-0.321289	-0.242172
C5orf30	4.82813	45.5774	-3.02272	-2.99326
C5orf34	7.41355	128.186	-3.94124	-10.6135
C5orf42	13.1318	65.5175	-2.07597	-1.95305
C5orf45	47.1846	8.54575	2.66944	2.78671
C5orf51	17.0789	76.9118	-1.94238	-2.67401
C5orf63	4.07951	14.2429	-1.61293	-0.676341
C6orf106	25.2954	72.6389	-1.31327	-1.57226
C6orf120	38.5019	35.6073	0.331643	0.187076
C6orf136	45.4957	41.3045	0.346913	0.214809
C6orf203	19.6676	11.3943	0.993679	0.504601
C6orf226	61.0842	34.183	1.04621	1.02
C6orf47	26.9665	55.5474	-0.834978	-0.70661
C6orf62	335.478	925.79	-1.24796	-2.51511
C6orf89	75.7005	62.6689	0.482715	0.425159
C7orf25	3.06775	11.3943	-1.67162	-0.622427
C7orf26	67.7426	45.5774	0.781593	0.707376
C7orf31	17.501	4.27288	2.24128	1.1619
C7orf43	44.8029	59.8203	-0.206802	-0.114103
C7orf49	30.869	9.97005	1.84097	1.47262
C7orf50	41.3561	7.12146	2.74543	2.58887
C7orf55	23.017	25.6373	0.0701162	0.0266413
C8orf33	48.0413	58.396	-0.0795509	-0.0429258
C8orf59	124.05	76.9118	0.890395	0.992233
C9orf114	28.9901	19.9401	0.744749	0.456448
C9orf142	67.2871	76.9118	0.0228476	0.0114496
C9orf16	147.677	78.3361	1.12465	1.69444
C9orf3	23.1851	22.7887	0.240646	0.101505
C9orf40	6.93608	101.125	-3.71459	-7.75828
C9orf64	2.82414	44.1531	-3.73855	-4.31748
C9orf72	47.3008	44.1531	0.323419	0.184718
C9orf78	413.81	113.943	2.06609	6.87614
C9orf85	17.4191	28.4858	-0.515603	-0.249513
C9orf91	10.0867	24.213	-1.06101	-0.590281
CA11	13.3249	0	5.88553	1.71446
CA2	1.20824	17.0915	-3.76047	-1.75765
CA5B	114.783	8.54575	3.95923	6.69184
CA7	0	14.2429	-7.28977	-3.19714
CAAP1	66.6858	37.0316	1.05952	1.16078
CAB39	95.2081	207.947	-0.908516	-1.30442
CAB39L	10.133	55.5474	-2.22807	-2.67414
CABIN1	97.838	76.9118	0.552928	0.561255
CABLES2	8.2605	44.1531	-2.22269	-2.28686
CABYR	2.62196	14.2429	-2.1774	-0.934362
CACFD1	3.34787	32.7587	-3.17262	-2.56574
CACNA1A	0	27.0616	-8.21578	-5.50059
CACNA2D2	12.7971	0	5.81252	1.66938
CACNA2D4	14.732	0	6.01024	1.75861
CACNB1	10.029	41.3045	-1.84462	-1.74112
CACTIN	33.6395	47.0017	-0.282313	-0.155904
CACUL1	87.5931	94.0033	0.0991863	0.0614377
CACYBP	144.63	125.338	0.414886	0.432176
CAD	25.0461	65.5175	-1.17459	-1.20493
CAGE1	33.3538	5.69717	2.75814	2.20963
CALCOCO1	27.7162	27.0616	0.256136	0.114064
CALCOCO2	149.184	0	9.36099	4.25907
CALCRL	0.353229	121.065	-8.01172	-12.7222
CALHM2	15.1592	18.5158	-0.0524643	-0.0154929
CALM1	1302.56	1444.23	0.0641342	0.0552025
CALM3	205.989	152.399	0.645539	0.82933
CALR	1000.84	1176.47	-0.0178623	-0.0129508
CALU	71.2712	139.581	-0.752416	-0.856338
CAMK1D	86.9776	101.125	-0.0135118	-0.00793854
CAMK2D	116.111	196.552	-0.549144	-0.685332
CAMK2G	73.1077	61.2446	0.469103	0.393999
CAMK2N1	15.8763	5.69717	1.67676	0.791611
CAMK4	581.21	420.166	0.674347	1.15395
CAMKK2	13.8909	32.7587	-1.02137	-0.666341
CAMKMT	29.3248	9.97005	1.76249	1.22859
CAMLG	188.007	25.6373	3.08235	8.72998
CAMSAP1	32.2681	5.69717	2.71524	2.13184
CAMSAP2	2.76408	66.9417	-4.32555	-6.59916
CAMTA1	56.5802	18.5158	1.8179	2.19252
CAMTA2	33.9025	27.0616	0.529652	0.297351
CAND1	106.718	84.0333	0.552343	0.582934
CAND2	2.59434	14.2429	-2.27838	-1.03552
CANT1	37.3577	106.822	-1.31651	-1.84158
CANX	232.316	272.04	-0.0166207	-0.0118511
CAP1	111.943	380.286	-1.54882	-3.95681
CAPG	12.9295	61.2446	-2.0048	-2.16198
CAPN1	71.7134	136.732	-0.713336	-0.754078
CAPN10	25.1866	8.54575	1.75878	1.17293
CAPN15	26.6134	51.2745	-0.735767	-0.582743
CAPN2	235.903	59.8203	2.19491	5.40222
CAPN7	69.5328	163.794	-1.02872	-1.42976
CAPNS1	175.643	260.646	-0.357171	-0.377696
CAPRIN1	202.734	373.165	-0.668758	-1.0813
CAPRIN2	15.3322	11.3943	0.640961	0.26128
CAPZA2	100.434	319.042	-1.46041	-3.13842
CAPZB	176.786	300.526	-0.554381	-0.770067
CARD11	168.384	91.1547	1.09745	1.87908
CARD19	32.6893	51.2745	-0.437055	-0.220303
CARD6	1.60534	84.0333	-5.39209	-10.6798
CARF	17.6774	8.54575	1.2662	0.632523
CARHSP1	37.0872	5.69717	2.92152	2.32208
CARM1	20.3601	29.9101	-0.346543	-0.168413
CARNMT1	44.9241	21.3644	1.28149	1.21295
CARS	40.5505	27.0616	0.798073	0.59113
CARS2	91.773	34.183	1.63381	2.49047
CASC1	36.9885	4.27288	3.33426	2.48528
CASC3	160.898	139.581	0.408271	0.39518
CASC4	75.328	14.2429	2.6148	3.77712
CASD1	19.1616	41.3045	-0.901191	-0.664832
CASK	67.1849	8.54575	3.19229	3.98436
CASP1	7.76758	15.6672	-0.800665	-0.309589
CASP2	20.0232	28.4858	-0.298563	-0.131609
CASP3	38.3582	41.3045	0.115039	0.0554393
CASP5	0	24.213	-8.05531	-5.03853
CASP6	10.4862	24.213	-0.99554	-0.53804
CASP7	25.1031	22.7887	0.349771	0.164611
CASP8	453.595	203.674	1.36179	3.1659
CASP8AP2	25.4824	56.9717	-0.940239	-0.755381
CASP9	23.8192	5.69717	2.2783	1.46459
CASS4	55.3345	5.69717	3.48659	3.50093
CAST	329.639	254.948	0.579727	0.853229
CASZ1	47.7714	17.0915	1.67845	1.51035
CAT	37.2068	109.671	-1.33117	-1.67025
CBARP	0.444159	119.641	-7.96471	-12.8271
CBFA2T2	51.9106	37.0316	0.70243	0.559062
CBFB	69.4571	175.188	-1.12564	-1.95305
CBL	50.7485	233.584	-1.98993	-5.56733
CBLB	242.343	695.055	-1.3122	-3.75272
CBLL1	97.4333	101.125	0.150661	0.0925772
CBR3	12.1005	0	5.72777	1.62769
CBR4	14.547	14.2429	0.235715	0.0803806
CBX1	24.1148	111.095	-1.9855	-3.57999
CBX3	197.787	82.609	1.46964	3.26464
CBX4	207.165	377.437	-0.656872	-1.04547
CBX5	79.548	37.0316	1.3141	1.66241
CBX6	67.6714	24.213	1.69001	2.26145
CBX7	56.3156	66.9417	-0.0437533	-0.0243866
CBY1	12.2507	8.54575	0.712044	0.240046
CC2D1A	25.0592	32.7587	-0.180163	-0.0811653
CC2D1B	31.271	41.3045	-0.206166	-0.0990517
CCAR1	156.297	106.822	0.750374	0.741227
CCAR2	127.284	61.2446	1.26167	2.06948
CCDC106	20.5363	0	6.48954	2.08518
CCDC107	43.9388	32.7587	0.639716	0.393932
CCDC109B	298.805	7.12146	5.60196	12.4991
CCDC112	10.6032	2.84858	2.10243	0.735302
CCDC115	62.5322	51.2745	0.489477	0.386875
CCDC117	29.2946	129.611	-1.93706	-3.93965
CCDC12	67.4114	55.5474	0.491418	0.382253
CCDC120	28.1066	0	6.94221	2.37628
CCDC124	21.2444	51.2745	-1.06273	-0.960795
CCDC125	3.18956	38.4559	-3.36467	-3.45004
CCDC126	5.56547	14.2429	-1.13158	-0.454872
CCDC127	5.27236	79.7604	-3.65385	-6.31712
CCDC130	53.6652	11.3943	2.44118	2.87289
CCDC134	38.4791	48.4259	-0.123205	-0.0637874
CCDC137	25.1225	25.6373	0.169034	0.0720327
CCDC138	12.5917	4.27288	1.78096	0.738164
CCDC14	32.8155	2.84858	3.73963	2.3738
CCDC141	54.6407	0	7.90945	3.01272
CCDC15	7.62469	34.183	-1.90315	-1.21773
CCDC157	28.4111	4.27288	2.94596	2.01839
CCDC159	32.9047	0	7.17704	2.54303
CCDC167	19.406	8.54575	1.40872	0.713008
CCDC171	3.63535	22.7887	-2.45834	-1.50368
CCDC173	62.1117	0	8.09917	3.21065
CCDC174	138.757	37.0316	2.10907	3.41884
CCDC18	21.816	2.84858	3.15659	1.65845
CCDC180	21.177	0	6.53548	2.11742
CCDC186	117.167	76.9118	0.814064	0.870932
CCDC191	15.61	4.27288	2.09165	0.995314
CCDC22	25.0575	34.183	-0.241685	-0.115786
CCDC25	36.2033	34.183	0.29616	0.147605
CCDC28A	60.8521	42.7288	0.721232	0.646111
CCDC28B	8.69084	14.2429	-0.502437	-0.173439
CCDC43	59.0513	15.6672	2.11276	2.43458
CCDC47	76.9875	84.0333	0.0801509	0.0507432
CCDC50	17.5854	19.9401	0.0400629	0.0112217
CCDC53	45.7418	91.1547	-0.786285	-0.826987
CCDC57	98.3696	2.84858	5.31802	4.88257
CCDC58	7.10669	22.7887	-1.44632	-0.779035
CCDC59	368.381	86.8818	2.28698	6.15484
CCDC6	60.7336	45.5774	0.623689	0.545651
CCDC61	7.22843	15.6672	-0.900528	-0.365525
CCDC65	15.4637	0	6.08548	1.8445
CCDC66	113.817	12.8186	3.3573	5.50586
CCDC69	142.327	28.4858	2.53327	5.89342
CCDC71	34.7358	29.9101	0.414521	0.233686
CCDC71L	10.7533	58.396	-2.21211	-2.62216
CCDC77	21.2355	17.0915	0.519762	0.239972
CCDC84	108.931	21.3644	2.55143	4.48495
CCDC85C	10.0851	2.84858	2.03386	0.713008
CCDC86	31.413	58.396	-0.693273	-0.553159
CCDC88B	105.351	215.068	-0.820362	-1.17291
CCDC88C	248.23	182.309	0.6593	0.922981
CCDC9	45.4915	143.854	-1.45556	-2.62664
CCDC90B	62.5127	25.6373	1.49642	1.83691
CCDC91	110.226	21.3644	2.57946	5.08194
CCDC92	51.5085	34.183	0.80287	0.705598
CCDC93	128.622	51.2745	1.53498	2.83485
CCDC94	100.708	59.8203	0.957162	1.1614
CCDC97	52.4464	59.8203	0.0217493	0.0112217
CCL25	0	29.9101	-8.36017	-5.90688
CCM2	97.3638	297.677	-1.39716	-3.1378
CCNB1IP1	15.8731	0	6.12999	1.84745
CCNC	68.0321	32.7587	1.26398	1.50125
CCND2	165.464	321.89	-0.746018	-1.15792
CCND3	497.753	354.649	0.701952	1.19309
CCNDBP1	108.126	150.975	-0.265063	-0.200286
CCNE1	5.40629	22.7887	-1.86623	-1.13563
CCNE2	2.81764	17.0915	-2.40568	-1.27744
CCNG1	148.791	162.369	0.0828674	0.0604479
CCNG2	7.04493	126.762	-3.92396	-10.3822
CCNH	432.757	85.4575	2.55502	9.1602
CCNI	502.575	37.0316	3.97858	15.9974
CCNJ	12.9262	9.97005	0.562547	0.196253
CCNK	245.823	0	10.0803	4.93317
CCNL1	2227.11	589.657	2.1271	10.7101
CCNL2	103.149	175.188	-0.559049	-0.661255
CCNO	0.33048	17.0915	-5.69614	-2.74095
CCNT1	138.779	254.948	-0.670725	-0.888416
CCNT2	70.8903	66.9417	0.294863	0.214303
CCNY	146.149	172.339	-0.0332639	-0.0227046
CCNYL1	23.9102	44.1531	-0.667495	-0.462541
CCP110	11.2892	5.69717	1.19186	0.449939
CCPG1	59.4872	207.947	-1.59288	-3.54823
CCR4	390.257	12.8186	5.14856	13.5466
CCR6	115.531	21.3644	2.65892	1.6463
CCR7	595.613	1653.6	-1.2638	-3.6875
CCR8	8.28485	81.1847	-3.04709	-4.93317
CCR9	12.8783	12.8186	0.243309	0.0703394
CCRL2	2.36535	15.6672	-2.52299	-1.24997
CCS	27.2637	65.5175	-1.04476	-1.00952
CCSAP	42.1834	54.1231	-0.149516	-0.080068
CCSER2	185.089	74.0632	1.5344	3.16389
CCT2	177.718	220.765	-0.10645	-0.0750977
CCT3	111.094	259.221	-1.01116	-1.67205
CCT4	242.301	354.649	-0.341102	-0.398327
CCT5	39.0735	517.018	-3.50829	-19.3395
CCT6B	19.1698	5.69717	1.95622	1.09292
CCT7	68.8959	152.399	-0.926696	-1.24041
CCT8	146.151	250.675	-0.57325	-0.748663
CD164	380.463	799.028	-0.858819	-1.81894
CD19	0.2168	12.8186	-6.17598	-2.37628
CD2	255.894	391.68	-0.406344	-0.429157
CD200	17.644	35.6073	-0.778541	-0.454374
CD226	87.9674	42.7288	1.26053	1.60354
CD247	437.616	1130.89	-1.16327	-3.08077
CD27	113.509	536.958	-2.0228	-6.11789
CD274	9.54998	111.095	-3.32314	-7.67676
CD28	295.991	789.058	-1.20698	-2.63066
CD2AP	112.412	141.005	-0.119313	-0.0812132
CD2BP2	27.0688	41.3045	-0.408071	-0.237465
CD320	22.9389	11.3943	1.22169	0.689751
CD37	884.089	380.286	1.42706	4.66641
CD38	12.9587	14.2429	0.046836	0.0130192
CD3D	362.097	697.903	-0.731418	-1.12939
CD3E	830.684	1303.23	-0.444621	-0.585477
CD3EAP	2.02431	17.0915	-2.90258	-1.57729
CD3G	380.538	1358.77	-1.62793	-5.54147
CD4	232.276	555.474	-1.04343	-2.13029
CD40LG	102.953	172.339	-0.525969	-0.534852
CD44	2344.48	183.734	3.88437	28.9151
CD46	232.298	0	10.0012	4.83091
CD47	287.811	504.2	-0.599798	-0.914042
CD48	852.598	197.977	2.31557	9.89397
CD5	906.374	831.787	0.334166	0.420156
CD53	392.706	1928.49	-2.07959	-7.49403
CD6	604.362	434.409	0.685275	1.21296
CD63	38.1193	0	7.39276	2.67632
CD69	2069.97	387.408	2.62399	12.9141
CD7	414.101	85.4575	2.48671	10.1109
CD72	7.90158	24.213	-1.40902	-0.857139
CD74	716.063	437.258	0.928226	1.60655
CD79A	4.25081	74.0632	-3.98723	-6.89982
CD79B	8.22879	28.4858	-1.5665	-0.985271
CD81	200.208	71.2146	1.70031	2.76788
CD82	95.1769	143.854	-0.379271	-0.307016
CD83	169.744	94.0033	1.05764	1.71889
CD84	63.6329	225.038	-1.61127	-2.84513
CD8B	0.2168	55.5474	-8.29146	-7.15664
CD9	0.881823	122.489	-7.22237	-14.6126
CD96	191.322	170.915	0.368699	0.311202
CD99L2	16.944	17.0915	0.201637	0.0732857
CDADC1	17.7227	74.0632	-1.851	-2.51103
CDAN1	21.5473	56.9717	-1.19768	-1.17024
CDC123	72.4949	37.0316	1.17606	1.3584
CDC14A	617.312	32.7587	4.44296	22.4398
CDC14B	10.3189	5.69717	1.07444	0.377419
CDC16	18.0321	34.183	-0.711164	-0.440901
CDC23	12.7501	12.8186	0.207735	0.066018
CDC25A	0.11368	15.6672	-6.46549	-2.81917
CDC25B	219.801	74.0632	1.78381	4.05999
CDC26	41.007	25.6373	0.885713	0.684513
CDC27	66.7823	101.125	-0.388543	-0.332827
CDC37	225.633	286.283	-0.132642	-0.112127
CDC37L1	82.9727	103.973	-0.117576	-0.0788419
CDC40	113.614	148.126	-0.179306	-0.106619
CDC42	337.491	324.739	0.260594	0.226904
CDC42BPB	15.5677	0	6.10491	1.85143
CDC42EP3	1.12787	94.0033	-6.20477	-12.7526
CDC42EP4	6.63808	17.0915	-1.13885	-0.463037
CDC42SE1	506.699	264.918	1.14636	2.83705
CDC42SE2	764.862	230.735	1.93715	7.42449
CDC45	1.78233	14.2429	-2.89089	-1.27871
CDC5L	105.53	34.183	1.83189	2.94219
CDC7	11.459	19.9401	-0.553476	-0.198297
CDC73	151.151	123.913	0.493126	0.549003
CDCA3	1.11325	11.3943	-3.2477	-1.26857
CDCA4	29.3684	78.3361	-1.21281	-1.38525
CDCA7L	9.57036	24.213	-1.12674	-0.494485
CDH24	3.084	24.213	-2.76019	-1.80858
CDHR3	16.9676	0	6.24152	1.92343
CDIP1	38.4427	72.6389	-0.695834	-0.594995
CDIPT	32.7406	108.246	-1.51722	-2.15346
CDK1	2.0495	11.3943	-2.22516	-0.843801
CDK10	28.4436	34.183	-0.0569658	-0.0249542
CDK12	86.1606	128.186	-0.364449	-0.335463
CDK13	222.073	178.037	0.526252	0.624096
CDK16	138.962	59.8203	1.42642	2.46041
CDK17	371.524	423.015	0.0228461	0.0172538
CDK19	26.3371	76.9118	-1.35003	-1.45574
CDK2	8.88652	49.8502	-2.29851	-2.60595
CDK2AP2	46.5017	427.288	-2.97906	-11.9019
CDK4	11.4768	88.3061	-2.70127	-4.37015
CDK5	4.90937	79.7604	-3.73596	-5.88306
CDK5R1	15.2494	9.97005	0.820035	0.352252
CDK5RAP1	83.041	29.9101	1.6751	2.36115
CDK5RAP2	54.2515	17.0915	1.8713	2.17419
CDK5RAP3	56.184	34.183	0.924216	0.900796
CDK6	58.1922	1.42429	5.55584	2.91037
CDK7	48.2167	42.7288	0.383138	0.252037
CDK8	24.5347	56.9717	-1.00676	-0.913387
CDK9	62.0735	66.9417	0.0939288	0.0547038
CDKAL1	150.368	79.7604	1.11532	1.38065
CDKL3	31.9084	2.84858	3.70757	2.29861
CDKN1A	490.096	35.6073	3.99784	16.5427
CDKN1B	749.199	1173.62	-0.432553	-0.547156
CDKN2AIP	105.697	88.3061	0.468176	0.463805
CDKN2AIPNL	42.9305	98.2762	-0.994605	-1.19612
CDKN2C	13.6099	2.84858	2.47077	1.00211
CDNF	11.9356	28.4858	-1.0573	-0.652592
CDON	1.58259	35.6073	-4.24388	-4.10953
CDPF1	5.12131	17.0915	-1.51084	-0.723938
CDR2	149.115	21.3644	3.01488	7.1933
CDS2	136.118	190.855	-0.277785	-0.261826
CDT1	0.11368	132.459	-9.54522	-11.077
CDV3	463.116	183.734	1.54462	4.62309
CDYL2	25.0794	49.8502	-0.792466	-0.602247
CEBPB	77.2002	227.887	-1.34792	-2.70306
CEBPG	59.605	38.4559	0.839922	0.813691
CEBPZ	213.12	172.339	0.515456	0.580332
CEBPZOS	26.3584	12.8186	1.24444	0.830214
CECR5	19.6984	106.822	-2.2374	-4.21477
CELF1	81.0451	173.764	-0.8996	-1.23521
CELF2	706.971	267.767	1.60623	4.93213
CELSR1	0.117743	22.7887	-7.00606	-3.85576
CENPA	43.5591	132.459	-1.39293	-2.36778
CENPB	48.4569	45.5774	0.304016	0.173054
CENPC	470.791	35.6073	3.9315	14.1946
CENPF	10.0266	1.42429	3.01164	0.894329
CENPH	10.7022	1.42429	3.10765	0.951206
CENPJ	4.95244	27.0616	-2.18608	-1.34659
CENPK	52.916	14.2429	2.11626	1.94885
CENPL	10.5382	31.3344	-1.34891	-0.946915
CENPM	120.884	2.84858	5.63064	5.14706
CENPN	21.9491	8.54575	1.57113	0.934943
CENPO	8.25887	12.8186	-0.42676	-0.135901
CENPP	21.1827	4.27288	2.52171	1.47421
CENPQ	3.17087	31.3344	-3.10114	-2.71721
CENPT	73.9416	19.9401	2.10664	2.95995
CENPV	11.0611	1.42429	3.14921	0.966636
CENPW	4.63734	19.9401	-1.91063	-1.08041
CEP104	27.6902	12.8186	1.32538	0.837619
CEP120	111.469	98.2762	0.390226	0.356584
CEP128	47.2074	18.5158	1.56757	1.59834
CEP131	13.6026	2.84858	2.4563	1.01453
CEP135	37.0835	29.9101	0.524084	0.308982
CEP152	14.7687	14.2429	0.270294	0.0934253
CEP164	29.4952	18.5158	0.882834	0.579915
CEP170	38.156	19.9401	1.15147	0.951206
CEP170B	8.14113	15.6672	-0.737517	-0.292613
CEP19	27.09	12.8186	1.27406	0.821378
CEP192	44.8411	54.1231	-0.0642646	-0.0336422
CEP250	15.0472	45.5774	-1.41947	-1.18305
CEP290	23.2388	0	6.6878	2.20963
CEP295	36.5768	68.366	-0.690074	-0.516277
CEP350	116.598	108.246	0.314289	0.239069
CEP41	3.97882	11.3943	-1.29489	-0.46173
CEP44	51.1197	19.9401	1.56268	1.60278
CEP57	126.138	78.3361	0.898569	1.27477
CEP57L1	7.04493	15.6672	-0.921589	-0.370762
CEP63	35.4226	31.3344	0.379953	0.207823
CEP68	42.5286	27.0616	0.871177	0.682048
CEP70	20.2936	9.97005	1.23349	0.652592
CEP72	11.3047	5.69717	1.17931	0.424202
CEP76	19.4921	17.0915	0.392144	0.165784
CEP78	20.4121	4.27288	2.46581	1.39188
CEP83	25.6966	52.6988	-0.823165	-0.683086
CEP85	14.3837	31.3344	-0.921943	-0.559019
CEP85L	235.958	2.84858	6.57994	7.73426
CEP95	154.362	68.366	1.37734	2.3488
CEP97	15.3842	111.095	-2.63792	-5.6387
CEPT1	30.2675	106.822	-1.60684	-2.15433
CERK	85.1537	69.7903	0.500866	0.440998
CERS2	68.2111	183.734	-1.21675	-1.82455
CERS4	14.3594	31.3344	-0.913641	-0.580196
CERS5	46.1898	85.4575	-0.688618	-0.648484
CERS6	58.2898	74.0632	-0.136418	-0.0747965
CETN2	11.1439	72.6389	-2.46617	-3.52956
CETN3	14.417	85.4575	-2.36352	-3.85576
CFAP20	186.024	66.9417	1.67573	3.15108
CFAP36	158.36	39.8802	2.19893	5.37512
CFAP43	2.2663	91.1547	-5.09196	-11.2033
CFAP70	14.8734	0	6.03343	1.81001
CFAP97	49.5265	15.6672	1.86946	2.0298
CFDP1	60.6469	135.308	-0.947491	-1.29496
CFL1	1241.14	3691.77	-1.3576	-3.64263
CFL2	76.0319	18.5158	2.23587	2.85636
CFLAR	244.759	59.8203	2.23781	6.42856
CFP	14.2831	4.27288	1.95585	0.892707
CGGBP1	136.075	284.858	-0.855746	-1.4886
CGRRF1	55.0367	31.3344	1.01812	1.00102
CHAF1A	28.6368	2.84858	3.53303	2.11395
CHAF1B	7.08307	14.2429	-0.817603	-0.307214
CHAMP1	34.221	17.0915	1.20924	0.953728
CHCHD1	18.8985	45.5774	-1.05243	-0.86278
CHCHD10	115.794	162.369	-0.280827	-0.22351
CHCHD2	212.891	29.9101	3.03883	6.51215
CHCHD3	63.0911	122.489	-0.741835	-0.808632
CHCHD5	28.1927	11.3943	1.52289	1.10723
CHCHD6	11.2454	7.12146	0.861639	0.301207
CHCHD7	62.5787	81.1847	-0.156847	-0.0897395
CHD1	63.9756	250.675	-1.7532	-2.71909
CHD1L	23.2712	54.1231	-1.00373	-0.908056
CHD2	2753.18	571.141	2.47831	14.7769
CHD3	172.732	143.854	0.468465	0.490299
CHD4	156.34	230.735	-0.356028	-0.351926
CHD6	179.981	22.7887	3.18437	7.7853
CHD7	49.4817	75.4875	-0.406109	-0.306824
CHD8	95.3908	11.3943	3.26915	5.32581
CHD9	36.8137	61.2446	-0.527479	-0.403447
CHEK2	10.2637	7.12146	0.749928	0.238119
CHERP	77.2432	99.7005	-0.155138	-0.100642
CHFR	72.5329	118.216	-0.495789	-0.493786
CHIC1	32.4232	7.12146	2.38216	1.82966
CHIC2	265.948	178.037	0.784992	1.24044
CHID1	13.9867	15.6672	0.0358079	0.0111357
CHKA	39.4114	160.945	-1.82622	-3.85899
CHM	20.1751	45.5774	-0.955085	-0.727545
CHMP1A	57.5839	52.6988	0.333274	0.229382
CHMP2A	78.7121	122.489	-0.42476	-0.382157
CHMP2B	91.4128	51.2745	1.047	1.36593
CHMP4B	90.5625	253.524	-1.2769	-2.75327
CHMP5	42.2314	85.4575	-0.811575	-0.856425
CHMP6	13.5816	22.7887	-0.516294	-0.220303
CHMP7	291.128	19.9401	4.07228	12.7977
CHN1	16.1077	0	6.17839	1.84745
CHN2	9.71478	35.6073	-1.67804	-1.38637
CHORDC1	145.955	229.311	-0.440065	-0.482296
CHP1	71.8904	135.308	-0.695841	-0.728322
CHPF	7.34047	28.4858	-1.72753	-1.14098
CHPF2	48.53	48.4259	0.215031	0.121713
CHPT1	31.2327	5.69717	2.66517	1.93169
CHRAC1	127.084	78.3361	0.914793	1.19089
CHRNE	1.79939	18.5158	-3.15408	-1.78508
CHST10	4.6081	27.0616	-2.38941	-1.70508
CHST11	123.943	7.12146	4.33679	6.72215
CHST12	7.63851	31.3344	-1.78446	-1.21296
CHST15	1.01256	27.0616	-4.47919	-0.913419
CHST2	2.76971	15.6672	-2.36955	-1.0572
CHST7	16.1921	0	6.16274	1.86746
CHSY1	23.146	7.12146	1.90175	1.19169
CHTF8	50.6023	173.764	-1.56035	-2.88819
CHTOP	111.116	38.4559	1.74349	2.92779
CHUK	47.697	105.398	-0.93246	-1.17686
CHURC1	143.577	47.0017	1.81448	3.12028
CIAO1	42.9524	64.0932	-0.372333	-0.26138
CIAPIN1	20.3878	71.2146	-1.60656	-1.93169
CIART	2.19405	37.0316	-3.78638	-3.49985
CIB1	248.203	44.1531	2.69902	8.59866
CIC	78.4108	99.7005	-0.143344	-0.0933611
CIDEB	23.1737	0	6.68838	2.20215
CINP	18.9903	9.97005	1.13555	0.601604
CIPC	19.0706	24.213	-0.141586	-0.0559407
CIR1	185.156	8.54575	4.63537	7.6688
CIRBP	1038.49	343.254	1.81166	5.12074
CISD1	10.4821	28.4858	-1.22979	-0.770784
CISD2	55.3646	246.403	-1.93999	-4.54928
CISH	17.0666	131.035	-2.71732	-5.84544
CITED2	815.806	1049.7	-0.149942	-0.137755
CITED4	80.4962	0	8.46843	3.50017
CIZ1	128.096	103.973	0.51196	0.564235
CKAP2	98.7457	11.3943	3.32246	4.81027
CKAP4	29.8523	7.12146	2.26496	1.6668
CKAP5	36.7497	32.7587	0.366577	0.185981
CKLF	40.2695	69.7903	-0.571032	-0.422283
CKS2	25.8135	126.762	-2.05301	-2.47701
CLASP1	94.6119	45.5774	1.26296	1.84745
CLASP2	66.6499	138.156	-0.837488	-1.11194
CLASRP	101.599	72.6389	0.685304	0.699883
CLCC1	32.005	19.9401	0.892235	0.619534
CLCF1	10.3059	62.6689	-2.35965	-2.54347
CLCN2	1.02475	17.0915	-3.79307	-2.05654
CLCN3	81.8561	59.8203	0.66219	0.665014
CLCN4	0	95.4276	-10.0339	-11.6475
CLCN5	4.36292	11.3943	-1.15971	-0.379029
CLCN6	10.5544	31.3344	-1.34991	-0.962091
CLCN7	35.573	28.4858	0.532374	0.335551
CLDND1	120.694	48.4259	1.52789	2.75843
CLEC16A	56.1922	59.8203	0.122859	0.0707905
CLIC1	168.89	525.564	-1.42275	-3.05217
CLIC4	3.85051	29.9101	-2.75175	-2.28447
CLINT1	158.024	477.138	-1.38687	-3.41843
CLIP1	55.4589	71.2146	-0.15333	-0.0930344
CLIP4	29.4944	0	7.02145	2.43834
CLK1	1132.81	566.868	1.2085	3.55656
CLK2	38.0414	81.1847	-0.892755	-0.948725
CLK3	83.4678	52.6988	0.874445	0.932293
CLK4	112.528	280.586	-1.10823	-1.90638
CLN6	20.3	51.2745	-1.13279	-1.03552
CLNS1A	90.1721	118.216	-0.179422	-0.131282
CLOCK	11.1204	24.213	-0.904728	-0.487299
CLP1	17.8787	71.2146	-1.78431	-2.17478
CLPB	18.7727	25.6373	-0.227481	-0.092628
CLPP	110.172	52.6988	1.27704	1.89183
CLPTM1	70.6879	94.0033	-0.207176	-0.143935
CLPTM1L	31.7518	132.459	-1.83292	-3.13171
CLPX	29.5318	29.9101	0.189957	0.0863548
CLSTN1	237.585	22.7887	3.59253	11.4344
CLSTN3	16.1693	1.42429	3.71756	1.30733
CLTA	147.348	552.625	-1.69861	-5.64187
CLTB	138.466	55.5474	1.52657	2.79699
CLTC	130.431	358.922	-1.25202	-2.83408
CLUH	27.8581	61.2446	-0.934301	-0.878582
CLYBL	22.1928	17.0915	0.588522	0.295515
CMAS	13.1723	115.368	-2.89958	-6.36709
CMC1	14.6777	71.2146	-2.06597	-2.85934
CMC2	121.869	17.0915	3.0511	5.76507
CMC4	32.1179	28.4858	0.389003	0.209947
CMIP	102.379	357.497	-1.59399	-3.82384
CMPK1	253.043	125.338	1.22459	2.64894
CMPK2	6.50741	18.5158	-1.28197	-0.613419
CMSS1	177.959	28.4858	2.85761	7.35913
CMTM3	66.5125	14.2429	2.43512	3.21048
CMTM6	106.969	166.642	-0.430838	-0.457191
CMTM7	150.691	86.8818	1.01002	1.4931
CMTM8	70.2024	1.42429	5.82399	3.17985
CMTR1	68.6036	138.156	-0.806215	-1.0411
CMTR2	16.7524	18.5158	0.0759644	0.0257931
CNBD2	0	32.7587	-8.49141	-6.31206
CNBP	545.527	1259.07	-0.9969	-2.46839
CNDP2	39.5242	22.7887	1.01191	0.809179
CNEP1R1	25.3978	27.0616	0.11368	0.0483433
CNIH1	103.081	89.7304	0.406149	0.369038
CNIH4	23.7559	51.2745	-0.903891	-0.768364
CNKSR2	23.514	0	6.69416	2.21607
CNN2	387.099	498.502	-0.15238	-0.138262
CNN3	5.63042	49.8502	-2.98488	-3.33477
CNNM2	25.2646	7.12146	2.02419	1.36371
CNNM3	39.805	22.7887	1.01243	0.814328
CNNM4	18.5599	41.3045	-0.934718	-0.684151
CNOT1	228.04	129.611	1.02336	1.94621
CNOT10	73.02	103.973	-0.294055	-0.224709
CNOT11	44.2282	56.9717	-0.155014	-0.0864592
CNOT2	253.177	128.186	1.19227	2.40996
CNOT3	46.9093	34.183	0.658957	0.501105
CNOT4	117.759	148.126	-0.125502	-0.0808683
CNOT6	39.637	99.7005	-1.13391	-1.3957
CNOT6L	141.001	118.216	0.464568	0.492293
CNOT7	82.502	105.398	-0.138932	-0.088659
CNOT8	160.661	85.4575	1.12011	1.98563
CNOT9	98.444	49.8502	1.18786	1.65701
CNP	27.8801	196.552	-2.60327	-7.90963
CNPPD1	54.0207	222.19	-1.82343	-3.72245
CNPY3	68.7426	32.7587	1.28272	1.54064
CNPY4	34.1098	21.3644	0.875049	0.587233
CNST	164.282	119.641	0.668216	0.858334
CNTRL	107.284	185.158	-0.575591	-0.655257
CNTROB	8.8297	12.8186	-0.315698	-0.0944993
COA3	3.84645	28.4858	-2.68062	-2.1389
COA4	25.5358	5.69717	2.36579	1.60291
COA5	46.6812	66.9417	-0.319936	-0.201936
COA6	22.4315	32.7587	-0.325787	-0.158121
COA7	1.3861	21.3644	-3.68556	-2.1881
COASY	34.51	31.3344	0.354847	0.195257
COG1	57.3655	51.2745	0.359525	0.229409
COG2	39.5957	34.183	0.41856	0.25378
COG3	116.724	47.0017	1.51982	2.67187
COG4	21.7779	37.0316	-0.550425	-0.329691
COG5	165.662	86.8818	1.13651	1.9068
COG6	29.0607	34.183	-0.0280209	-0.0118511
COG7	13.7058	9.97005	0.661861	0.252491
COIL	43.0071	45.5774	0.124968	0.0568228
COL1A1	14.249	2.84858	2.54677	1.06896
COL4A3BP	56.5965	105.398	-0.691204	-0.749662
COL6A2	33.8302	0	7.21917	2.53449
COLGALT1	33.8758	45.5774	-0.2131	-0.109262
COMMD10	61.2383	18.5158	1.9346	2.15272
COMMD2	24.9294	17.0915	0.753812	0.409608
COMMD3	63.5885	106.822	-0.543854	-0.525045
COMMD4	2.18836	55.5474	-4.40812	-1.16299
COMMD5	15.7139	9.97005	0.860397	0.379936
COMMD6	437.882	38.4559	3.72241	15.5818
COMMD7	51.2858	61.2446	-0.0497706	-0.0252949
COMMD8	22.1425	192.279	-2.89053	-8.54455
COMMD9	79.4408	0	8.45233	3.48035
COMT	22.4753	18.5158	0.484658	0.220331
COMTD1	17.8331	28.4858	-0.477603	-0.22417
COPA	122.692	212.22	-0.583928	-0.714264
COPB1	99.9758	162.369	-0.490661	-0.491335
COPB2	32.217	84.0333	-1.17841	-1.47432
COPE	175.546	136.732	0.572854	0.718072
COPG1	57.2014	163.794	-1.30785	-2.38689
COPG2	11.0546	27.0616	-1.06396	-0.621058
COPS2	223.754	59.8203	2.10341	3.68808
COPS3	90.2556	78.3361	0.40812	0.350129
COPS4	55.4031	69.7903	-0.125744	-0.0671329
COPS5	67.5139	82.609	-0.0848641	-0.0521343
COPS6	19.3663	35.6073	-0.671645	-0.419464
COPS7A	11.2795	24.213	-0.889141	-0.465502
COPS7B	52.2418	24.213	1.30972	1.26013
COPS8	106.355	122.489	0.00102164	0.00068637
COPS9	80.8707	139.581	-0.571573	-0.592515
COPZ1	72.2966	227.887	-1.43402	-2.55379
COQ10A	39.8822	0	7.45326	2.73133
COQ10B	178.456	388.832	-0.908409	-1.57655
COQ2	39.4722	14.2429	1.67801	1.57978
COQ4	57.043	11.3943	2.53547	2.99326
COQ5	22.2991	44.1531	-0.785749	-0.570418
COQ6	41.9455	15.6672	1.63044	1.58904
COQ7	24.8261	22.7887	0.34282	0.151178
COQ9	10.6843	38.4559	-1.62954	-1.40051
CORO1A	624.744	2254.65	-1.63559	-4.33267
CORO1B	71.2869	159.521	-0.952528	-1.12175
CORO1C	7.72128	47.0017	-2.43027	-2.51977
CORO2A	11.299	21.3644	-0.682803	-0.296745
COTL1	497.502	1128.04	-0.963308	-1.63717
COX10	23.2729	41.3045	-0.615007	-0.370881
COX11	37.7313	11.3943	1.93738	1.79526
COX14	140.842	133.883	0.278861	0.24775
COX15	12.5998	35.6073	-1.27541	-0.960509
COX16	89.4096	102.549	0.0070548	0.00426963
COX18	27.7997	41.3045	-0.356403	-0.201517
COX19	120.1	15.6672	3.14803	6.15438
COX20	58.4545	106.822	-0.656113	-0.692472
COX4I1	561.276	722.116	-0.15435	-0.142151
COX5A	115.78	244.978	-0.866808	-1.06134
COX6A1	150.413	910.123	-2.38817	-11.3241
COX6B1	236.303	212.22	0.367776	0.38979
COX6C	279.641	210.795	0.614946	0.916978
COX7A2	112.718	78.3361	0.729671	0.8617
COX7A2L	78.2161	126.762	-0.477161	-0.430242
COX7C	516.779	317.617	0.912315	1.95456
CPD	55.6131	8.54575	2.90282	3.2763
CPEB2	157.6	118.216	0.629431	0.692734
CPEB3	10.0461	2.84858	2.03679	0.699883
CPEB4	68.6515	8.54575	3.21106	4.1852
CPM	3.30323	47.0017	-3.59729	-4.41204
CPNE1	146.669	133.883	0.343473	0.335017
CPNE3	41.9515	18.5158	1.39406	1.08252
CPNE8	18.858	0	6.39383	2.00685
CPOX	20.0987	18.5158	0.336387	0.140493
CPPED1	10.9247	9.97005	0.359027	0.10839
CPQ	42.5415	8.54575	2.52144	2.48091
CPSF1	62.3473	76.9118	-0.0808105	-0.0425775
CPSF2	30.5272	86.8818	-1.3043	-1.73896
CPSF3	20.5542	102.549	-2.10724	-3.74819
CPSF3L	97.708	61.2446	0.888057	1.0502
CPSF4	7.88695	32.7587	-1.85531	-1.49133
CPSF6	162.738	128.186	0.546323	0.531689
CPSF7	80.5727	62.6689	0.573848	0.51296
CPT1A	20.7563	59.8203	-1.293	-0.943227
CPT2	28.4014	5.69717	2.53476	1.8347
CPTP	30.2771	25.6373	0.465693	0.240082
CRACR2A	35.3204	0	7.28331	2.6167
CRADD	35.391	47.0017	-0.20005	-0.103171
CRAMP1	25.9313	12.8186	1.22427	0.809392
CRAT	11.3404	5.69717	1.18791	0.439262
CRBN	196.329	91.1547	1.31633	2.46947
CRCP	64.2179	29.9101	1.31043	1.57468
CREB1	183.619	266.343	-0.326466	-0.354637
CREB3	17.4572	72.6389	-1.85966	-2.52243
CREB3L2	25.9499	15.6672	0.93452	0.573607
CREBBP	173.844	5.69717	5.1384	8.22987
CREBL2	58.5016	32.7587	1.0574	0.995855
CREBRF	146.433	66.9417	1.33368	2.28339
CREBZF	99.3835	212.22	-0.888835	-1.3445
CREG1	30.1367	54.1231	-0.626194	-0.463085
CRELD1	64.7262	31.3344	1.26733	1.32825
CRELD2	18.4316	31.3344	-0.548957	-0.296259
CREM	333.998	817.544	-1.0753	-2.15276
CRIM1	2.81601	38.4559	-3.53831	-3.36219
CRIP2	28.6213	4.27288	2.96364	1.9188
CRIPT	67.3193	122.489	-0.658778	-0.618585
CRK	38.9224	91.1547	-1.02294	-1.2323
CRKL	59.6504	99.7005	-0.528191	-0.501436
CRLF2	0.454719	81.1847	-7.18284	-0.939147
CRLF3	94.1502	152.399	-0.484932	-0.489356
CRLS1	58.6687	34.183	0.985571	0.992233
CRMP1	0.227359	15.6672	-5.65355	-2.46947
CRNKL1	103.538	61.2446	0.961983	0.946149
CROT	12.4658	45.5774	-1.68685	-1.58251
CRTAP	70.1	9.97005	3.02768	4.0207
CRTC2	146.906	112.519	0.590742	0.70993
CRTC3	136.236	88.3061	0.83055	1.01689
CRY1	172.476	65.5175	1.60857	3.41476
CRY2	155.662	24.213	2.89626	7.16849
CRYL1	24.8797	47.0017	-0.697764	-0.485234
CRYZ	10.5869	2.84858	2.10404	0.748859
CRYZL1	27.7991	22.7887	0.49772	0.238119
CSAD	51.6709	0	7.82688	2.99933
CSDE1	931.808	403.075	1.41642	4.49941
CSE1L	42.2459	102.549	-1.08351	-1.28323
CSF1	10.1881	2.84858	2.03966	0.688946
CSGALNACT1	87.4522	4.27288	4.55685	4.76737
CSGALNACT2	138.213	25.6373	2.64066	5.30119
CSK	253.198	310.496	-0.0808943	-0.0638546
CSNK1A1	118.192	561.171	-2.04146	-7.73426
CSNK1D	120.824	172.339	-0.305075	-0.281046
CSNK1E	31.6647	15.6672	1.2162	0.857899
CSNK1G1	28.006	81.1847	-1.32255	-1.70551
CSNK1G2	178.457	232.16	-0.170774	-0.146579
CSNK1G3	94.8075	133.883	-0.292133	-0.243199
CSNK2A2	100.365	49.8502	1.2112	1.61541
CSNK2B	172.777	209.371	-0.0661226	-0.0507432
CSPP1	32.4241	47.0017	-0.325089	-0.18402
CSRNP1	696.414	8.54575	6.56785	17.9409
CSRNP2	31.3594	47.0017	-0.370959	-0.19706
CSRP1	58.6946	257.797	-1.92098	-4.81745
CST3	22.1164	99.7005	-1.93554	-0.592445
CST7	106.638	81.1847	0.609932	0.427077
CSTB	255.55	136.732	1.11874	1.92333
CSTF1	29.7194	21.3644	0.682833	0.388375
CSTF2	19.3233	58.396	-1.38188	-1.45265
CSTF2T	59.5076	68.366	0.00708185	0.00403375
CSTF3	33.3846	48.4259	-0.328341	-0.198232
CTB-133G6.1	186.742	310.496	-0.522743	-0.71646
CTB-50L17.10	11.178	146.702	-3.50682	-10.2334
CTBP1	134.187	196.552	-0.339269	-0.318142
CTBS	127.352	21.3644	2.78255	6.08041
CTC1	131.989	21.3644	2.83399	6.3319
CTCF	108.073	293.404	-1.23317	-2.7289
CTDNEP1	199.639	132.459	0.801573	1.2801
CTDP1	84.0745	49.8502	0.969769	1.10006
CTDSP1	72.907	85.4575	-0.0159689	-0.00857359
CTDSP2	160.734	199.401	-0.100844	-0.0765192
CTDSPL2	157.933	64.0932	1.50749	2.67907
CTH	28.7587	0	6.99471	2.41875
CTLA4	176.371	573.99	-1.48388	-3.34398
CTNNA1	11.2462	11.3943	0.188667	0.0554393
CTNNAL1	18.6631	2.84858	2.9453	1.38661
CTNNB1	218.186	333.284	-0.402804	-0.483965
CTNNBIP1	13.2169	4.27288	1.83947	0.792795
CTNNBL1	57.1837	51.2745	0.36481	0.252491
CTNS	10.3749	24.213	-1.00519	-0.530948
CTPS1	79.2221	37.0316	1.29975	1.67398
CTPS2	5.90571	189.431	-4.79993	-17.4505
CTR9	101.696	66.9417	0.815434	1.0032
CTSA	55.3614	180.885	-1.49676	-2.9932
CTSB	107.266	220.765	-0.826906	-1.02575
CTSC	118.984	212.22	-0.618232	-0.670945
CTSE	0	262.07	-11.4914	-17.0834
CTSF	17.5351	2.84858	2.81816	1.32635
CTSH	24.3315	5.69717	2.30862	1.36531
CTSO	16.5381	37.0316	-0.95818	-0.677792
CTSS	119.288	297.677	-1.10423	-2.00964
CTSV	0.565966	37.0316	-5.86162	-5.51343
CTSW	154.558	126.762	0.492845	0.433924
CTSZ	19.7949	37.0316	-0.691416	-0.400975
CTU2	16.3772	106.822	-2.47647	-3.98425
CUEDC2	14.2871	14.2429	0.213693	0.0704721
CUL1	173.702	112.519	0.835975	1.2499
CUL2	103.935	95.4276	0.32689	0.257235
CUL3	286.435	256.373	0.366032	0.39776
CUL4A	68.9958	42.7288	0.89894	0.96873
CUL4B	75.0544	82.609	0.0719994	0.0413577
CUL5	91.0752	49.8502	1.07189	1.23797
CUL7	12.707	27.0616	-0.880037	-0.468999
CUL9	26.7083	5.69717	2.43709	1.68767
CUTA	270.881	65.5175	2.26246	6.04009
CUTC	38.5458	1.42429	4.97022	2.36276
CUX1	74.7858	138.156	-0.680052	-0.631196
CUZD1	18.7118	0	6.36898	2.01693
CWC15	178.043	74.0632	1.47099	2.78317
CWC27	51.1978	25.6373	1.21117	1.06853
CWF19L1	52.3076	19.9401	1.59623	1.71025
CWF19L2	213.605	44.1531	2.47571	5.26016
CXCL10	0.117743	39.8802	-7.81342	-5.80816
CXCL16	15.9826	1.42429	3.69282	1.31976
CXCR3	52.5411	31.3344	0.967823	0.645848
CXCR4	4067.43	521.291	3.18673	2.43172
CXCR5	48.495	38.4559	0.5671	0.296208
CXXC1	68.0545	172.339	-1.13616	-1.85541
CXorf23	1.37391	25.6373	-3.93573	-2.91373
CXorf38	38.8308	58.396	-0.375827	-0.251034
CXorf56	24.9504	2.84858	3.34122	1.89326
CXorf57	60.3203	0	8.07238	3.13741
CYB561	19.5416	0	6.42358	2.03794
CYB561A3	45.0035	24.213	1.10608	1.00507
CYB561D1	17.0341	37.0316	-0.915501	-0.639171
CYB5A	12.7671	212.22	-3.83674	-13.9822
CYB5B	40.5897	103.973	-1.1331	-1.324
CYB5D2	68.5808	17.0915	2.23025	2.58723
CYB5R1	29.2353	31.3344	0.113122	0.0517942
CYB5R3	66.6807	35.6073	1.11404	1.28008
CYB5R4	70.3478	54.1231	0.583996	0.520414
CYBA	371.487	260.646	0.727683	1.00008
CYBB	2.84932	15.6672	-2.19034	-0.984067
CYC1	22.8675	88.3061	-1.74803	-2.58546
CYFIP2	315.844	253.524	0.525787	0.75151
CYHR1	26.2853	47.0017	-0.64112	-0.447218
CYLD	244.326	98.2762	1.52185	3.43837
CYP20A1	87.1993	7.12146	3.82511	5.39786
CYP2R1	23.5447	2.84858	3.2493	1.78227
CYP4V2	64.3179	15.6672	2.25565	2.91879
CYP51A1	35.1029	116.792	-1.51621	-2.45839
CYSLTR1	33.7243	0	7.2199	2.54303
CYSTM1	54.4096	5.69717	3.47388	3.306
CYTH1	365.772	431.561	-0.0273372	-0.0218779
CYTH2	57.4083	122.489	-0.882649	-1.0097
CYTH3	9.42654	79.7604	-2.85396	-4.95705
CYTH4	67.6405	225.038	-1.52253	-3.45576
CYTIP	1284.87	1702.03	-0.197225	-0.200408
D2HGDH	31.8897	48.4259	-0.392928	-0.235298
DAAM1	39.1107	41.3045	0.143474	0.0636872
DAB1	24.438	0	6.75258	2.2645
DAD1	194.491	769.118	-1.76298	-4.1164
DAG1	36.6522	44.1531	-0.0444333	-0.0198382
DAGLB	113.942	8.54575	3.94914	6.60332
DALRD3	40.0348	19.9401	1.22284	0.978098
DAP3	151.256	153.824	0.182701	0.150083
DAPK1	0.888319	18.5158	-4.22449	-2.20552
DAPK3	16.3756	0	6.17715	1.89664
DAPL1	0	423.015	-12.1822	-19.7339
DAPP1	39.8067	138.156	-1.58878	-2.98514
DARS	84.216	88.3061	0.142335	0.0944277
DARS2	8.06482	11.3943	-0.284636	-0.0811653
DAXX	13.7228	68.366	-2.07828	-2.43405
DAZAP1	84.9222	141.005	-0.524347	-0.553212
DAZAP2	968.259	555.474	1.01076	2.37208
DBF4	188.691	99.7005	1.12986	2.10401
DBI	94.4853	116.792	-0.0868628	-0.0541462
DBNDD2	17.3175	2.84858	2.81268	1.30848
DBNL	78.3467	230.735	-1.34453	-2.71897
DBP	35.7312	24.213	0.777113	0.506363
DBR1	36.583	56.9717	-0.438919	-0.296268
DBT	10.6868	18.5158	-0.57013	-0.231387
DCAF1	60.4658	84.0333	-0.268193	-0.187359
DCAF10	36.6148	25.6373	0.720281	0.496852
DCAF11	71.5309	81.1847	0.0338234	0.0191163
DCAF12	17.2851	115.368	-2.52227	-5.14976
DCAF13	50.707	106.822	-0.858146	-0.935875
DCAF15	38.9963	28.4858	0.656597	0.453083
DCAF17	23.1599	32.7587	-0.284528	-0.136767
DCAF5	104.945	85.4575	0.498102	0.451662
DCAF6	47.0207	61.2446	-0.165618	-0.0938678
DCAF7	30.999	222.19	-2.61669	-7.78732
DCAKD	33.353	24.213	0.677683	0.439428
DCK	51.1472	111.095	-0.90066	-1.08408
DCLRE1B	29.6178	45.5774	-0.40624	-0.248072
DCLRE1C	23.2355	58.396	-1.1181	-1.02416
DCP1B	7.3908	24.213	-1.52945	-0.904304
DCP2	121.064	55.5474	1.33302	2.25936
DCPS	27.3424	59.8203	-0.92334	-0.801005
DCTD	44.293	1.42429	5.16385	2.53608
DCTN1	78.9771	47.0017	0.962092	1.06261
DCTN2	86.2474	176.612	-0.825264	-1.18613
DCTN3	76.7463	101.125	-0.186733	-0.132314
DCTN4	161.05	111.095	0.742404	0.93516
DCTN5	30.4151	101.125	-1.53423	-2.30503
DCTN6	107.356	126.762	-0.0334093	-0.0212136
DCTPP1	14.1612	17.0915	-0.0608156	-0.0190434
DCUN1D1	36.8244	15.6672	1.44317	1.22234
DCUN1D2	9.86254	24.213	-1.12328	-0.588859
DCUN1D3	9.08304	14.2429	-0.403168	-0.11914
DCUN1D4	36.2964	17.0915	1.29949	1.08017
DCUN1D5	63.5741	317.617	-2.12084	-6.11289
DCXR	64.5084	2.84858	4.71276	3.75287
DDA1	130.891	311.92	-1.04586	-2.11295
DDB1	105.823	216.492	-0.822961	-1.309
DDB2	49.4428	179.461	-1.64834	-3.58481
DDHD1	98.8197	71.2146	0.67665	0.727231
DDHD2	61.7429	22.7887	1.6454	2.04209
DDIT3	491.962	85.4575	2.74324	8.83935
DDIT4	226.767	11.3943	4.54617	2.37133
DDOST	113.112	116.792	0.162246	0.116652
DDRGK1	68.2609	131.035	-0.731988	-0.910934
DDX1	49.7743	28.4858	1.01354	0.87142
DDX10	34.563	133.883	-1.73777	-2.88867
DDX11	4.9184	25.6373	-2.19457	-0.330791
DDX17	415.546	119.641	2.00797	6.93589
DDX18	223.829	74.0632	1.80446	3.90902
DDX19A	69.3173	118.216	-0.551707	-0.527032
DDX20	86.5636	17.0915	2.55489	4.14432
DDX21	463.471	575.414	-0.113547	-0.069235
DDX23	58.1206	128.186	-0.93131	-1.28318
DDX24	753.947	163.794	2.40738	9.32485
DDX27	159.096	190.855	-0.0508074	-0.0359695
DDX28	0	11.3943	-6.96784	-2.60643
DDX31	68.2981	38.4559	1.02656	1.02155
DDX39A	175.052	138.156	0.548673	0.658771
DDX39B	556.537	485.684	0.402737	0.489154
DDX3Y	723.73	0	11.6166	1.09001
DDX41	34.9525	78.3361	-0.957814	-1.02118
DDX42	72.6937	166.642	-0.996323	-1.37043
DDX46	151.587	276.313	-0.658121	-0.777601
DDX47	159.958	116.792	0.654455	0.621437
DDX49	37.4105	55.5474	-0.363693	-0.239069
DDX5	4666.52	6471.98	-0.262639	-0.337066
DDX50	104.299	84.0333	0.520631	0.52145
DDX51	38.1779	44.1531	-0.00775557	-0.00391742
DDX54	69.0283	91.1547	-0.190444	-0.131054
DDX55	33.8768	25.6373	0.60356	0.367029
DDX56	70.6854	58.396	0.479082	0.392502
DDX58	32.3608	94.0033	-1.33524	-1.69029
DDX59	31.4465	14.2429	1.34939	1.01363
DDX6	531.875	199.401	1.62118	4.14053
DDX60	26.4583	41.3045	-0.431632	-0.253228
DEAF1	57.6318	45.5774	0.54025	0.419658
DECR1	69.8509	17.0915	2.2385	3.16037
DEDD	36.6497	32.7587	0.366302	0.210667
DEDD2	166.701	215.068	-0.156108	-0.127873
DEF6	262.105	309.071	-0.0296213	-0.0231579
DEF8	10.8686	18.5158	-0.59072	-0.229873
DEK	181.051	84.0333	1.31795	2.62038
DENND1A	24.81	74.0632	-1.36395	-1.59722
DENND1B	60.3732	116.792	-0.734576	-0.823063
DENND1C	164.911	115.368	0.724789	0.935523
DENND2D	106.691	289.131	-1.22248	-2.32537
DENND3	46.3895	7.12146	2.90257	2.78062
DENND4A	271.88	276.313	0.180838	0.149769
DENND4B	86.6284	78.3361	0.355217	0.297262
DENND4C	49.1384	15.6672	1.86467	1.99799
DENND5A	87.8481	19.9401	2.34751	3.93945
DENND6A	185.894	51.2745	2.05935	3.95839
DENND6B	0.117743	45.5774	-8.00606	-6.3346
DENR	96.4936	89.7304	0.313178	0.25249
DEPDC5	24.2862	28.4858	-0.026263	-0.00996683
DERA	15.3484	48.4259	-1.45397	-1.41774
DERL1	132.381	244.978	-0.675786	-0.980089
DERL2	45.2868	25.6373	1.02646	0.888416
DESI1	102.534	66.9417	0.829083	0.991106
DESI2	35.8799	48.4259	-0.216019	-0.116243
DET1	6.92239	18.5158	-1.19641	-0.483118
DEXI	8.86783	37.0316	-1.8756	-1.59835
DFFA	13.2974	41.3045	-1.42106	-1.21933
DFFB	14.0241	39.8802	-1.3048	-1.08408
DGAT1	46.228	192.279	-1.84779	-4.15467
DGAT2	0.231423	22.7887	-6.18938	-3.60427
DGCR14	58.3162	31.3344	1.10443	1.14709
DGCR8	17.7276	34.183	-0.74786	-0.467973
DGKA	448.144	324.739	0.671855	1.1076
DGKD	83.3707	153.824	-0.676884	-0.844381
DGKE	35.4536	45.5774	-0.159207	-0.0818816
DGKQ	22.5818	25.6373	0.0342104	0.0129553
DGKZ	113.126	320.466	-1.28827	-2.86047
DGUOK	114.292	78.3361	0.759144	0.901508
DHCR24	2.53672	34.183	-3.50263	-2.88276
DHCR7	14.789	85.4575	-2.28799	-3.1659
DHDDS	14.3327	27.0616	-0.698721	-0.369685
DHPS	95.6813	96.8519	0.188015	0.135362
DHRS1	15.6903	32.7587	-0.839461	-0.52145
DHRS13	15.7415	5.69717	1.67929	0.823751
DHRS3	70.1493	8.54575	3.23493	3.80339
DHRS7B	9.35992	35.6073	-1.72442	-1.44106
DHX15	206.676	317.617	-0.413569	-0.488397
DHX16	40.7649	119.641	-1.34731	-2.13893
DHX29	48.1453	25.6373	1.11433	1.00559
DHX30	59.3526	64.0932	0.0962231	0.0549158
DHX32	6.77697	19.9401	-1.37388	-0.686206
DHX33	10.0851	39.8802	-1.77261	-1.63147
DHX34	8.14113	14.2429	-0.599961	-0.214837
DHX35	38.9055	11.3943	1.96975	1.67863
DHX36	161.146	65.5175	1.50482	2.8547
DHX37	63.7941	35.6073	1.0402	1.03513
DHX38	98.7158	51.2745	1.15068	1.62509
DHX40	160.538	135.308	0.453243	0.496852
DHX57	22.4487	27.0616	-0.0572964	-0.0220713
DHX58	15.4783	32.7587	-0.884006	-0.528608
DHX8	121.124	85.4575	0.711131	0.808983
DHX9	388.524	420.166	0.0931321	0.0758304
DIABLO	87.5509	31.3344	1.69405	2.65021
DIAPH1	181.994	235.008	-0.152774	-0.11688
DIAPH2	51.3114	58.396	0.0226725	0.0111357
DIAPH3	1.43966	14.2429	-3.18808	-1.39397
DICER1	66.7979	45.5774	0.758981	0.680623
DIDO1	91.0125	193.704	-0.884993	-1.30669
DIEXF	28.1993	65.5175	-1.00741	-0.963554
DIMT1	32.4574	34.183	0.146389	0.0670348
DIP2A	104.137	8.54575	3.81588	6.24473
DIP2B	85.7361	282.01	-1.51741	-0.520063
DIP2C	1.69383	11.3943	-2.5601	-1.01268
DIRC2	21.0147	55.5474	-1.19357	-1.14046
DIS3	154.812	41.3045	2.11275	4.43546
DIS3L	37.2197	21.3644	1.00498	0.782155
DIS3L2	68.9446	42.7288	0.891027	0.887774
DISC1	24.9667	1.42429	4.3416	1.79431
DKC1	63.527	35.6073	1.03695	1.0502
DLAT	21.5214	29.9101	-0.260771	-0.114983
DLD	64.5437	66.9417	0.158857	0.0952254
DLEC1	20.0564	1.42429	4.04011	1.56231
DLG1	54.8126	71.2146	-0.174846	-0.103484
DLG3	13.3948	12.8186	0.279474	0.0928564
DLG4	20.84	66.9417	-1.49151	-1.72174
DLGAP4	48.323	48.4259	0.207469	0.118335
DLST	100.996	138.156	-0.241847	-0.201735
DMAP1	29.6706	8.54575	2.00501	1.56624
DMGDH	18.8465	0	6.38143	2.0189
DMTN	28.3413	0	6.98285	2.3908
DMWD	17.4985	0	6.26384	1.93272
DMXL1	56.7728	64.0932	0.0327999	0.0178592
DNAAF2	50.2165	18.5158	1.64197	1.73446
DNAAF5	19.8397	42.7288	-0.895873	-0.680422
DNAJA1	622.411	22.7887	4.97756	22.7113
DNAJA2	204.529	329.012	-0.476539	-0.638774
DNAJA3	33.9417	35.6073	0.14668	0.0710694
DNAJA4	30.8074	34.183	0.0626503	0.0276736
DNAJB1	604.775	323.314	1.11712	2.53449
DNAJB12	100.246	112.519	0.0388035	0.0249542
DNAJB14	65.7998	11.3943	2.73275	3.55845
DNAJB2	118.276	44.1531	1.63433	2.79358
DNAJB4	39.5837	132.459	-1.53392	-1.99376
DNAJB5	3.07668	29.9101	-2.9995	-2.20412
DNAJB6	45.1643	85.4575	-0.724016	-0.670118
DNAJB9	161.994	213.644	-0.1812	-0.132717
DNAJC1	110.032	65.5175	0.95406	1.28559
DNAJC10	73.8298	72.6389	0.241441	0.152859
DNAJC11	38.5337	35.6073	0.319857	0.164654
DNAJC12	0	12.8186	-7.13777	-2.90346
DNAJC13	30.7879	96.8519	-1.43205	-2.01355
DNAJC15	67.4978	105.398	-0.423817	-0.340091
DNAJC16	20.2197	11.3943	1.03822	0.556529
DNAJC17	21.5433	29.9101	-0.249604	-0.107538
DNAJC18	7.58002	25.6373	-1.52991	-0.944108
DNAJC19	94.8594	116.792	-0.0907625	-0.0582349
[truncated: 6,646 more rows]

## Sheet: TableS2d
Differential gene expression analysis, mouse vs human, CD8+ T Cells
gene	tpm, human, CD8+ T Cells	tpm, mouse, CD8+ T Cells	log2(foldchange)	-log10(pvalue)*sign
A1BG	30.9372	0	8.09557	3.31354
AAAS	22.5171	52.399	-1.11107	-1.38853
AACS	14.3891	50.4092	-1.70787	-2.34605
AAED1	66.116	84.2364	-0.240861	-0.226015
AAGAB	52.5267	48.4193	0.227216	0.179422
AAK1	123.279	169.799	-0.354303	-0.445281
AAMDC	3.64563	22.5515	-2.52837	-2.15163
AAMP	55.5333	257.352	-2.10503	-8.89212
AAR2	38.0266	47.7561	-0.220389	-0.161947
AARS	43.2635	63.0115	-0.433742	-0.422808
AARS2	39.0963	21.2249	0.987524	1.00816
AARSD1	38.3471	41.7866	-0.0148254	-0.00860845
AASDH	22.572	25.8679	-0.0838394	-0.0417654
AASDHPPT	42.3761	57.042	-0.319112	-0.275514
ABAT	34.6331	1.32656	4.81537	3.99053
ABCA1	29.8348	41.7866	-0.372121	-0.237568
ABCA2	84.4822	68.981	0.4021	0.390368
ABCA3	8.09094	69.6443	-3.01728	-6.05175
ABCA5	65.8566	0.663279	6.74234	4.45416
ABCA7	57.1976	82.2466	-0.414996	-0.458079
ABCB10	16.9466	1.98984	3.20069	2.28395
ABCB7	44.4558	69.6443	-0.536233	-0.564169
ABCB8	22.4051	6.63279	1.86777	1.73052
ABCB9	14.9368	57.042	-1.82131	-2.81202
ABCC1	94.4142	131.992	-0.374306	-0.481264
ABCC10	25.4751	27.8577	-0.0200306	-0.0101
ABCC4	18.8326	49.7459	-1.2921	-1.68662
ABCC5	11.9352	108.778	-3.07253	-9.50666
ABCD1	18.9492	23.2148	-0.183723	-0.0946227
ABCD2	31.9382	0	8.14407	3.37157
ABCD3	37.6602	19.8984	1.02816	1.14978
ABCD4	53.6629	18.5718	1.64026	2.8358
ABCE1	75.832	238.78	-1.54482	-4.58314
ABCF1	174.136	205.616	-0.130624	-0.141047
ABCF2	26.0969	49.0826	-0.805068	-0.853664
ABCF3	71.4079	83.5731	-0.11992	-0.0931207
ABCG1	165.48	200.973	-0.170515	-0.165598
ABHD10	27.8043	24.5413	0.290534	0.181467
ABHD11	23.6492	118.064	-2.2109	-6.39601
ABHD12	46.4162	51.0725	-0.030107	-0.0194866
ABHD13	97.6401	59.0318	0.83552	1.43209
ABHD14A	30.6355	12.6023	1.39123	1.53367
ABHD14B	116.833	16.582	2.92697	9.85875
ABHD15	11.198	13.2656	-0.131817	-0.0477383
ABHD16A	50.4233	56.3787	-0.0529121	-0.0362068
ABHD17A	24.5443	90.8692	-1.78137	-3.34636
ABHD17B	40.1897	86.8895	-0.999583	-1.41725
ABHD17C	8.02979	15.9187	-0.887859	-0.46464
ABHD18	42.8312	0	8.56458	3.74739
ABHD2	44.897	228.831	-2.24458	-8.37157
ABHD3	64.1633	0	9.14672	4.25475
ABHD4	15.1272	4.64295	1.80941	1.24301
ABHD5	32.6681	36.4803	-0.0526951	-0.0294695
ABHD8	4.60493	59.6951	-3.55506	-6.4994
ABI1	270.686	250.056	0.224827	0.29079
ABI2	31.3295	19.2351	0.812579	0.739315
ABI3	45.9863	50.4092	-0.0241345	-0.0145141
ABL1	56.5616	91.5325	-0.584387	-0.715402
ABL2	15.0923	43.7764	-1.42301	-1.7266
ABLIM1	330.798	1160.74	-1.70743	-5.68867
ABR	63.8403	47.0928	0.546985	0.622886
ABRACL	93.4203	259.342	-1.36346	-3.14476
ABT1	60.4352	80.92	-0.312607	-0.293831
ABTB1	56.8912	39.1334	0.647588	0.731965
ABTB2	12.9633	128.013	-3.2109	-9.96711
AC004381.6	0.771246	56.3787	-6.0651	-10.6392
AC025263.3	1.071	120.717	-6.77498	-20.2365
AC068533.7	0	16.582	-7.91095	-4.75868
ACAA2	176.957	102.808	0.890501	1.91752
ACAD11	38.2596	13.9289	1.56745	2.11005
ACAD8	30.4078	19.2351	0.768593	0.671482
ACAD9	43.3183	21.2249	1.13786	1.42334
ACADL	0	32.5007	-8.88181	-7.78399
ACADM	14.2603	27.1944	-0.819319	-0.609822
ACADS	11.6298	22.5515	-0.845336	-0.54568
ACADSB	32.2988	15.9187	1.1306	1.18668
ACADVL	87.9247	43.1131	1.13699	2.123
ACAP1	176.639	193.677	-0.0241127	-0.0224868
ACAP2	128.378	93.5223	0.566579	0.907002
ACAP3	13.8604	23.2148	-0.632373	-0.397774
ACAT1	27.5174	112.094	-1.91662	-4.69543
ACBD3	146.552	123.37	0.358318	0.481008
ACBD4	14.471	15.9187	-0.0294181	-0.0116151
ACBD5	48.2112	93.5223	-0.849713	-1.1808
ACBD6	0.0887369	103.471	-9.59071	-11.6197
ACCS	16.5563	14.5921	0.293063	0.134639
ACD	40.119	92.859	-1.10478	-1.8384
ACER3	12.218	24.5413	-0.895914	-0.628301
ACHE	20.5549	1.32656	4.06181	2.72334
ACIN1	303.554	694.453	-1.08564	-3.90744
ACLY	48.2552	129.339	-1.31474	-2.84173
ACO1	12.0632	32.5007	-1.3215	-1.30146
ACO2	94.0943	40.46	1.32617	2.83454
ACOD1	0	10.6125	-7.26709	-3.23517
ACOT13	6.95263	42.4498	-2.50164	-3.55119
ACOT7	29.0396	18.5718	0.749886	0.537399
ACOT8	34.8917	53.0623	-0.49679	-0.469105
ACOX1	23.8658	114.084	-2.14962	-5.96236
ACOX3	23.8657	35.817	-0.475559	-0.361098
ACP1	122.059	0.663279	7.63481	5.70872
ACP2	17.7957	11.939	0.681361	0.404371
ACP5	10.0819	273.271	-4.64378	-30.6311
ACP6	9.29431	23.878	-1.24858	-0.95162
ACPP	0	62.3482	-9.82169	-11.2088
ACSBG1	0	13.9289	-7.65941	-4.11697
ACSF2	9.0732	39.7967	-2.03938	-2.37086
ACSF3	23.5472	9.2859	1.45421	1.23844
ACSL1	75.1976	29.1843	1.47547	2.65985
ACSL3	182.536	171.789	0.196834	0.233565
ACSL4	53.4025	110.104	-0.937023	-1.57883
ACSL5	58.2823	3.97967	3.98161	6.74255
ACSS1	86.2917	27.8577	1.73925	4.00975
ACSS2	5.66486	74.2872	-3.57927	-8.14814
ACTA2	17.5127	0	7.27784	2.68291
ACTB	5393.08	13070.6	-1.16538	-5.08433
ACTG1	2264.65	7.95934	8.26253	55.0428
ACTL6A	22.0063	54.3888	-1.19395	-1.58739
ACTN1	79.7705	569.756	-2.75134	-0.969707
ACTN2	0.416089	27.1944	-5.84892	-5.33107
ACTN4	151.931	193.014	-0.23264	-0.206172
ACTR10	64.7461	98.1652	-0.491327	-0.575833
ACTR1A	95.8105	119.39	-0.207174	-0.200819
ACTR1B	57.4416	114.084	-0.882572	-1.49696
ACTR2	136.856	230.821	-0.644422	-1.26839
ACTR3	250.917	1236.35	-2.1909	-15.8892
ACTR3B	24.986	0	7.78672	3.09971
ACTR5	48.8331	72.2974	-0.458756	-0.444865
ACTR6	33.9677	17.2452	1.08969	1.02715
ACTR8	33.016	68.3177	-0.941871	-1.29772
ACVR1	17.0352	0	7.23342	2.67317
ACVR1B	9.8939	37.8069	-1.83252	-2.1333
ACVR2A	16.9844	12.6023	0.535969	0.269263
ACYP1	15.5873	49.7459	-1.56555	-2.07674
ACYP2	46.0013	7.29607	2.76379	4.54394
ADA	28.222	16.582	0.87328	0.735147
ADAL	11.7855	22.5515	-0.824542	-0.549765
ADAM10	38.2049	74.9505	-0.860655	-1.08019
ADAM15	17.8025	5.96951	1.68002	1.17713
ADAM17	35.1285	41.7866	-0.141221	-0.0894322
ADAM19	24.5656	49.0826	-0.891295	-0.982101
ADAM22	16.92	0	7.22089	2.6372
ADAM8	90.1303	0.663279	7.19679	5.0593
ADAM9	27.6576	19.8984	0.582256	0.409314
ADAMTS10	32.4042	135.972	-1.95852	-5.57971
ADAMTS17	16.2142	3.31639	2.39416	1.72768
ADAMTS6	8.28949	15.9187	-0.821168	-0.370384
ADAP1	49.3996	4.64295	3.51956	5.42128
ADAR	213.809	139.952	0.720898	1.58154
ADARB1	25.7759	2.65311	3.38892	3.25806
ADAT1	28.1108	10.6125	1.5158	1.60182
ADAT2	32.553	27.8577	0.33397	0.221974
ADAT3	31.6896	67.6544	-0.982426	-1.29296
ADCK1	6.42532	23.878	-1.78453	-1.46819
ADCK3	47.8932	14.5921	1.82259	2.64288
ADCK4	42.6644	17.9085	1.36114	1.86517
ADCK5	8.92221	13.2656	-0.45993	-0.198348
ADCY3	16.5367	47.0928	-1.40678	-1.70924
ADCY7	89.1879	193.014	-1.00479	-2.4302
ADD1	98.9803	179.749	-0.752692	-1.46636
ADD3	191.769	181.075	0.192832	0.222368
ADGRE5	480.332	681.187	-0.391102	-0.582437
ADGRF3	22.1344	0	7.61445	2.9591
ADGRG1	229.418	1.32656	7.54392	10.6868
ADGRG5	60.9492	188.371	-1.51682	-3.12973
ADGRL1	4.2394	51.0725	-3.49452	-5.97081
ADGRV1	13.883	0.663279	4.49471	1.94507
ADH5	36.9566	127.349	-1.67323	-3.59984
ADHFE1	43.6708	0	8.59611	3.74137
ADI1	38.4252	67.6544	-0.706643	-0.868296
ADIPOR1	93.593	151.228	-0.582863	-0.955732
ADIPOR2	44.9412	47.0928	0.0399882	0.0255606
ADK	127.213	35.817	1.9389	5.8119
ADNP	144.163	152.554	0.0247901	0.0203405
ADNP2	61.7407	14.5921	2.18811	4.27315
ADO	23.8832	51.7357	-1.01007	-1.18802
ADORA2A	20.4972	21.8882	0.0136988	0.00620228
ADPGK	115.207	80.2567	0.630185	0.969282
ADPRH	1.65903	37.1436	-4.36805	-5.94822
ADPRHL2	44.4775	26.5311	0.85477	0.951493
ADPRM	35.633	28.521	0.43138	0.332064
ADRB2	208.37	115.41	0.96753	1.63884
ADSL	32.4093	51.7357	-0.565198	-0.524438
ADSS	174.397	191.688	-0.0261519	-0.0240134
AEBP2	115.317	233.474	-0.91001	-2.0293
AEN	30.0639	37.1436	-0.197993	-0.126041
AES	825.534	535.266	0.732199	1.83901
AFAP1	34.8787	27.8577	0.431075	0.309199
AFF1	118.879	350.211	-1.44985	-5.59522
AFF3	4.8995	218.219	-5.35829	-3.82995
AFF4	240.508	171.789	0.594181	1.21374
AFG3L2	93.5961	60.3584	0.741398	1.18005
AFMID	1.53717	16.582	-3.34489	-2.32992
AFTPH	24.586	31.8374	-0.262145	-0.162023
AGA	32.6762	20.5616	0.779666	0.694421
AGAP2	60.2615	0.663279	6.61487	4.30471
AGAP3	29.7091	116.737	-1.86975	-4.39966
AGBL2	17.4835	0	7.2738	2.69497
AGBL3	24.5661	5.30623	2.31786	1.99028
AGBL5	10.4651	19.2351	-0.769279	-0.4587
AGFG1	92.5411	200.973	-1.00921	-2.38276
AGFG2	18.3564	23.2148	-0.231581	-0.120109
AGGF1	38.8682	79.5934	-0.922809	-1.33776
AGK	14.0828	7.29607	1.05345	0.575132
AGO1	46.7769	68.3177	-0.438866	-0.444206
AGO2	94.3081	72.9607	0.477985	0.594967
AGO3	75.0762	50.4092	0.683298	0.94932
AGO4	23.0626	0	7.67087	2.9956
AGPAT1	24.022	63.6747	-1.30113	-1.93205
AGPAT2	4.72168	13.9289	-1.44034	-0.766329
AGPAT3	30.8512	130.003	-1.96833	-5.12087
AGPAT4	104.556	49.0826	1.20036	2.46212
AGPAT5	29.9221	79.5934	-1.29756	-1.73045
AGPS	101.047	84.2364	0.37367	0.415817
AGTPBP1	111.257	31.8374	1.91225	5.16761
AGTRAP	44.2576	23.878	0.997216	1.16898
AHCTF1	92.8211	92.1957	0.118312	0.103955
AHCYL1	20.2864	91.5325	-2.06476	-4.83762
AHCYL2	21.9119	73.6239	-1.63853	-2.9835
AHDC1	36.0391	89.5426	-1.20363	-2.18493
AHI1	67.252	41.7866	0.793338	1.00688
AHNAK	1015.42	461.642	1.25113	3.67282
AHSA1	68.841	178.422	-1.26623	-3.23997
AHSA2	75.5966	35.817	1.18582	2.15309
AIF1	69.3601	0.663279	6.79677	2.4761
AIFM1	18.1278	21.8882	-0.163139	-0.0798749
AIG1	20.3536	39.1334	-0.834092	-0.784583
AIM2	17.4136	123.37	-2.71923	-7.19871
AIMP1	260.557	135.309	1.0546	2.40443
AIMP2	8.05165	61.6849	-2.83769	-5.52433
AIP	81.6603	90.8692	-0.0457033	-0.0358958
AK2	22.7957	133.982	-2.4531	-7.51678
AK3	91.4423	59.0318	0.740103	1.13104
AK5	11.9823	0	6.72238	2.16065
AKAP1	33.3389	1.98984	4.17434	4.1818
AKAP10	51.314	88.8793	-0.683051	-0.925903
AKAP11	16.4922	22.5515	-0.347712	-0.185995
AKAP13	526.295	745.525	-0.388706	-0.562754
AKAP2	9.62894	106.125	-3.37842	-7.20382
AKAP7	27.7594	1.98984	3.91393	3.53068
AKAP8	153.482	177.759	-0.10325	-0.102557
AKAP8L	112.969	186.381	-0.613919	-1.10797
AKAP9	131.526	66.9911	1.08146	2.43974
AKIP1	10.2881	13.2656	-0.260521	-0.103607
AKIRIN1	200.424	97.502	1.14981	3.21038
AKIRIN2	151.96	119.39	0.457742	0.678421
AKNA	467.083	201.637	1.32241	4.92437
AKR1A1	32.5387	169.799	-2.2748	-8.36624
AKR1B1	43.087	29.8475	0.63619	0.594152
AKR7A2	35.6729	32.5007	0.243918	0.167593
AKT1	55.9152	69.6443	-0.206664	-0.173882
AKT1S1	23.938	37.1436	-0.52691	-0.415772
AKT2	105.54	126.023	-0.147971	-0.135358
AKT3	81.3195	25.8679	1.76166	4.09604
AKTIP	25.2071	13.2656	1.03797	0.86538
ALAD	16.353	21.2249	-0.272109	-0.135002
ALAS1	20.9417	55.7154	-1.305	-1.83152
ALCAM	18.6342	3.97967	2.33227	1.89107
ALDH16A1	52.2305	17.9085	1.65326	2.8054
ALDH18A1	16.2242	23.878	-0.44343	-0.252879
ALDH3A2	15.5363	63.0115	-1.9037	-3.02779
ALDH4A1	4.81678	45.1029	-3.13303	-4.7334
ALDH5A1	10.3084	0.663279	4.06962	1.54721
ALDH6A1	12.4514	11.939	0.173291	0.0671956
ALDH7A1	0.709895	12.6023	-4.06289	-0.337866
ALDH9A1	43.0228	90.2059	-0.961476	-1.44235
ALDOC	13.5501	1.32656	3.46049	1.9621
ALG11	37.245	15.9187	1.3363	1.61777
ALG12	29.5266	9.94918	1.67666	1.8781
ALG14	8.82268	28.521	-1.5872	-1.47138
ALG2	51.8506	19.2351	1.54061	2.41961
ALG3	30.6523	16.582	0.995162	0.970432
ALG5	70.4929	61.6849	0.301166	0.294724
ALG6	22.1557	7.29607	1.71308	1.57854
ALG8	19.2206	15.9187	0.383725	0.209543
ALKBH1	28.8861	110.104	-1.81757	-4.32818
ALKBH2	23.5602	8.62262	1.56113	1.46888
ALKBH4	7.17472	80.2567	-3.38411	-7.93483
ALKBH5	216.734	129.339	0.851811	1.84335
ALKBH6	13.9434	33.1639	-1.1361	-1.04392
ALKBH7	89.1761	11.2757	3.08994	7.92416
ALKBH8	18.709	38.4702	-0.92495	-0.803306
ALMS1	61.4906	6.63279	3.32489	6.15243
ALOX5AP	133.926	1.98984	6.18554	9.85829
ALPK1	11.8738	1.32656	3.27341	1.72072
ALS2	21.2072	13.9289	0.717294	0.489159
ALS2CL	2.10293	146.585	-6.00117	-24.1022
AMBRA1	122.03	129.339	0.025011	0.0218823
AMFR	55.1848	61.6849	-0.0516784	-0.0362068
AMIGO1	23.1737	3.97967	2.64944	2.22276
AMIGO2	27.2017	11.939	1.29954	1.19318
AMIGO3	59.3912	0	9.03972	4.13029
AMMECR1	27.3221	30.5108	-0.0470614	-0.0247504
AMMECR1L	0.327353	70.9708	-7.61622	-11.3985
AMN1	17.494	29.1843	-0.62557	-0.422543
AMPD2	59.9583	30.5108	1.08277	1.55661
AMPD3	25.053	7.95934	1.7641	1.81204
AMZ2	90.8848	171.126	-0.80405	-1.3581
ANAPC1	43.9782	47.0928	0.0108679	0.00648384
ANAPC10	73.5565	35.817	1.14922	1.91208
ANAPC11	34.204	138.625	-1.91306	-5.47841
ANAPC13	26.1861	23.2148	0.285868	0.159879
ANAPC15	30.5567	29.1843	0.174758	0.103607
ANAPC16	174.62	122.043	0.624788	1.0458
ANAPC2	55.0057	67.6544	-0.189468	-0.157144
ANAPC4	41.3792	51.0725	-0.194989	-0.141644
ANAPC5	132.535	138.625	0.0451023	0.0400666
ANAPC7	27.0165	43.1131	-0.564126	-0.490981
ANGEL1	14.176	11.939	0.356976	0.152533
ANGEL2	64.8816	53.0623	0.399718	0.411395
ANK3	58.5423	0	9.01513	4.1278
ANKAR	34.7681	0	8.26221	3.48225
ANKFY1	23.8379	56.3787	-1.13171	-1.51195
ANKH	64.3118	21.8882	1.66483	3.21764
ANKIB1	33.5158	65.0013	-0.849809	-1.04589
ANKLE2	74.5429	61.6849	0.383252	0.408264
ANKMY1	49.2797	0	8.76606	3.92285
ANKMY2	18.7056	48.4193	-1.26423	-1.59216
ANKRA2	89.1307	27.8577	1.78745	4.40613
ANKRD10	143.591	169.799	-0.132045	-0.128861
ANKRD11	196.408	347.558	-0.716812	-1.40466
ANKRD12	331.933	48.4193	2.88534	18.0823
ANKRD13A	75.5052	179.749	-1.14254	-2.82256
ANKRD13B	2.48056	10.6125	-1.99816	-0.924127
ANKRD13C	106.304	128.013	-0.158589	-0.157354
ANKRD13D	86.4553	9.94918	3.22784	7.96304
ANKRD16	4.02243	39.7967	-3.17591	-4.15692
ANKRD17	138.089	150.564	-0.0161837	-0.013116
ANKRD27	25.5852	27.1944	0.0224346	0.0113232
ANKRD28	79.0532	24.5413	1.79733	3.82667
ANKRD37	17.6791	16.582	0.200307	0.0956218
ANKRD39	23.0778	9.2859	1.42088	1.28472
ANKRD40	31.2065	51.0725	-0.602537	-0.590281
ANKRD42	74.191	0	9.3574	4.44633
ANKRD46	36.2462	21.8882	0.838611	0.800304
ANKRD49	61.3421	1.32656	5.64167	5.74568
ANKRD52	40.2565	46.4295	-0.097619	-0.063083
ANKRD54	52.386	19.8984	1.50612	2.47005
ANKRD55	0.177474	32.5007	-7.11397	-5.97474
ANKRD60	0.882254	10.6125	-3.46024	-1.6512
ANKS1A	15.908	13.9289	0.301463	0.142418
ANKS3	7.89028	19.2351	-1.17414	-0.775005
ANKZF1	97.0147	15.2554	2.77792	8.34245
ANO10	14.2998	37.8069	-1.29505	-1.38336
ANO6	45.8785	183.728	-1.89224	-6.37867
ANO8	17.7948	10.6125	0.852541	0.533174
ANO9	57.7915	0	8.99675	4.12913
ANP32B	301.053	91.5325	1.82617	8.21401
ANP32E	145.517	173.116	-0.140135	-0.14233
ANTXR2	73.7423	35.1538	1.17844	1.99251
ANXA1	580.136	0.663279	9.88865	9.34528
ANXA11	269.593	155.207	0.905586	2.44192
ANXA2	27.0409	39.1334	-0.427164	-0.320425
ANXA4	28.3175	0	7.96926	3.22561
ANXA5	134.578	82.2466	0.823978	1.19635
ANXA6	413.918	826.445	-0.887486	-2.69864
ANXA7	109.896	47.7561	1.31168	3.13296
AOAH	185.705	0	10.6843	5.00927
AP000275.65	51.6764	33.8272	0.722447	0.799216
AP002884.2	16.1917	74.9505	-2.10209	-4.32428
AP1AR	16.1969	53.7256	-1.61955	-2.41786
AP1B1	67.1317	213.576	-1.56272	-4.7172
AP1G1	270.146	168.473	0.791573	1.92251
AP1G2	63.1953	32.5007	1.06838	1.68908
AP1M1	77.3552	86.8895	-0.0611987	-0.0421863
AP1S2	13.1449	39.7967	-1.49019	-1.6693
AP1S3	14.3333	7.29607	1.07915	0.633249
AP2A1	38.4944	66.9911	-0.694255	-0.729718
AP2A2	52.6999	84.8997	-0.578717	-0.673179
AP2B1	83.0973	105.461	-0.233841	-0.2258
AP2M1	110.021	29.8475	1.99042	5.8481
AP2S1	44.2541	100.155	-1.07225	-1.81143
AP3B1	136.704	85.5629	0.786407	1.48226
AP3D1	86.6729	103.471	-0.147502	-0.133347
AP3M1	48.8842	47.7561	0.143092	0.102391
AP3M2	52.2667	26.5311	1.08724	1.49166
AP3S1	44.0653	12.6023	1.91438	2.94644
AP3S2	32.0884	21.2249	0.706218	0.61886
AP4E1	26.1284	39.1334	-0.474258	-0.358757
AP4M1	4.96078	21.8882	-2.04534	-1.46888
AP4S1	12.2794	21.8882	-0.725541	-0.455251
AP5B1	22.0945	16.582	0.523182	0.327403
AP5M1	60.8873	61.6849	0.0922396	0.065501
AP5S1	16.9348	9.2859	0.973748	0.618659
AP5Z1	84.2104	28.521	1.67128	3.87816
APAF1	23.4547	39.1334	-0.627894	-0.540776
APBA2	97.6829	0	9.74722	4.74497
APBA3	29.5974	23.878	0.41999	0.297419
APBB1	57.3634	0	8.98292	4.06994
APBB1IP	125.823	715.678	-2.39859	-16.1467
APBB3	30.0844	58.3685	-0.843757	-0.968988
APC	39.0485	68.981	-0.712719	-0.871005
APEH	29.3638	83.5731	-1.39948	-2.57457
APEX1	122.514	72.9607	0.856485	1.58905
APEX2	20.4869	23.878	-0.110666	-0.0538074
APH1A	94.7306	27.1944	1.90838	4.82542
API5	159.108	179.749	-0.0667538	-0.0642253
APIP	28.027	23.2148	0.380727	0.255798
APLP2	76.0061	63.0115	0.380147	0.390368
APMAP	228.31	27.8577	3.14746	14.2255
APOBEC1	0	21.2249	-8.26709	-5.77544
APOBEC3H	15.0663	224.188	-3.80239	-18.813
APOBR	70.8234	11.939	2.67806	6.06671
APOE	0.299757	19.8984	-5.99729	-0.75496
APOL6	243.12	0	11.0713	6.18388
APOLD1	12.9282	0	6.83928	2.3724
APOM	20.9856	0	7.53549	2.90529
APOOL	11.7182	12.6023	0.00953136	0.0031871
APOPT1	24.0476	82.2466	-1.66128	-3.19488
APP	23.5917	17.9085	0.507536	0.313381
APPBP2	58.3557	128.676	-1.03019	-2.02878
APPL1	56.1226	94.1856	-0.638652	-0.875209
APPL2	65.6481	68.981	0.0376387	0.0279179
APRT	175.742	131.329	0.528581	0.898872
APTX	47.1029	29.1843	0.800184	0.916772
AQP3	103.299	51.7357	1.10809	2.22374
AQR	97.6859	65.6646	0.681458	1.06196
ARAF	122.851	137.962	-0.0581633	-0.0525247
ARAP1	167.341	133.319	0.437725	0.661197
ARAP2	255.86	68.3177	2.01912	6.83389
ARC	0	33.1639	-8.91095	-7.8852
ARCN1	153.022	115.41	0.516268	0.841668
AREL1	65.4391	29.1843	1.2749	2.18829
ARF1	483.619	377.406	0.469437	0.862611
ARF3	70.883	145.258	-0.927224	-1.82795
ARF4	298.056	442.407	-0.456049	-0.657699
ARF5	123.188	195.667	-0.560859	-0.81272
ARF6	217.465	283.22	-0.271651	-0.362902
ARFGAP1	58.869	98.1652	-0.629943	-0.870472
ARFGAP2	73.0278	47.7561	0.722951	0.992168
ARFGAP3	66.9438	13.9289	2.37814	4.37751
ARFGEF1	179.139	173.779	0.152416	0.168019
ARFGEF2	119.549	116.737	0.143438	0.141647
ARFIP2	48.1486	22.5515	1.20252	1.67624
ARFRP1	18.0272	88.8793	-2.18727	-4.89945
ARGLU1	702.406	263.322	1.52416	7.68765
ARHGAP1	69.6102	88.2161	-0.232684	-0.223133
ARHGAP10	29.0929	14.5921	1.10398	1.08637
ARHGAP11B	3.46815	11.2757	-1.60214	-0.757244
ARHGAP12	51.1717	34.4905	0.67723	0.760111
ARHGAP15	488.931	419.192	0.332046	0.375044
ARHGAP17	65.9267	62.3482	0.188778	0.159345
ARHGAP18	14.7729	25.8679	-0.70561	-0.43273
ARHGAP21	16.0184	5.96951	1.53145	1.01965
ARHGAP25	112.613	201.637	-0.728233	-1.19714
ARHGAP26	174.702	76.277	1.30603	3.44694
ARHGAP27	75.477	86.8895	-0.0931245	-0.0731306
ARHGAP30	127.104	296.486	-1.11246	-3.29947
ARHGAP31	68.3409	76.9403	-0.0594013	-0.0379856
ARHGAP33	14.4885	2.65311	2.55413	1.70439
ARHGAP35	3.5571	42.4498	-3.49572	-5.1448
ARHGAP39	1.06547	27.8577	-4.63838	-4.96232
ARHGAP4	248.761	418.529	-0.641962	-1.4802
ARHGAP45	346.979	1280.79	-1.77868	-8.6627
ARHGAP5	29.0098	1.32656	4.56054	3.61994
ARHGAP9	325.847	378.069	-0.106211	-0.123096
ARHGDIA	360.571	331.639	0.230899	0.275937
ARHGDIB	1796.34	1686.05	0.20304	0.262295
ARHGEF1	461.134	961.754	-0.952691	-3.00829
ARHGEF11	3.60655	36.4803	-3.21745	-4.22687
ARHGEF2	67.5513	107.451	-0.559562	-0.769715
ARHGEF3	141.522	504.092	-1.72312	-8.23527
ARHGEF40	12.2628	0	6.76107	2.32427
ARHGEF6	4.51682	144.595	-4.89158	-20.893
ARHGEF7	99.9286	65.0013	0.731073	1.10369
ARHGEF9	16.3697	1.98984	3.1465	2.19832
ARID1A	128.254	338.935	-1.29513	-3.70206
ARID1B	137.578	155.87	-0.0733399	-0.063083
ARID2	64.793	41.1233	0.764855	1.03948
ARID3B	33.6202	66.9911	-0.887358	-1.14772
ARID4A	112.768	146.585	-0.269841	-0.320425
ARID4B	279.47	121.38	1.31406	4.38285
ARID5A	373.648	961.754	-1.2559	-4.79626
ARID5B	87.2667	108.778	-0.207314	-0.198922
ARIH1	407.671	279.904	0.651386	1.50251
ARIH2	256.549	57.042	2.27796	10.4956
ARL1	26.8451	66.9911	-1.20833	-1.83383
ARL13B	15.6705	27.1944	-0.685151	-0.467396
ARL14EP	48.0943	27.1944	0.938568	0.78591
ARL15	55.023	66.3279	-0.160222	-0.127079
ARL16	28.8979	13.9289	1.16419	1.13295
ARL2BP	66.5085	175.769	-1.29178	-3.37157
ARL3	10.6434	11.2757	0.0223699	0.00757977
ARL4A	101.621	78.2669	0.487007	0.629025
ARL4C	759.474	811.853	0.016968	0.0163248
ARL4D	5.52094	14.5921	-1.28787	-0.710472
ARL5A	70.4683	30.5108	1.31876	2.21825
ARL5B	41.3892	97.502	-1.12767	-2.10414
ARL5C	0	110.104	-10.6421	-14.3691
ARL6IP1	174.137	285.873	-0.603289	-0.973307
ARL6IP4	202.164	49.7459	2.13075	8.91849
ARL6IP5	169.216	665.268	-1.86254	-6.75127
ARL6IP6	46.1616	61.0216	-0.294494	-0.254791
ARL8A	102.602	86.2262	0.361319	0.407882
ARL8B	143.952	135.309	0.199277	0.216993
ARMC1	26.4561	52.399	-0.875635	-0.999216
ARMC10	30.5912	23.2148	0.506962	0.388134
ARMC2	22.2738	0	7.61991	2.96842
ARMC5	43.5043	12.6023	1.89491	2.87829
ARMC6	12.6457	5.96951	1.193	0.677223
ARMC7	12.3908	141.278	-3.40635	-13.3692
ARMC8	107.299	82.2466	0.493761	0.670489
ARMC9	0.532631	17.9085	-4.91872	-3.51128
ARMCX2	2.01377	45.7662	-4.3383	-5.94508
ARMCX3	40.0953	11.939	1.85744	2.71621
ARMCX4	11.901	17.9085	-0.474576	-0.227863
ARMCX5	21.6237	84.8997	-1.85977	-3.69144
ARMCX6	41.0168	3.31639	3.73794	5.0668
ARMT1	16.1251	17.9085	-0.0444469	-0.0191328
ARNT	34.1534	122.707	-1.73714	-4.54025
ARNTL	176.744	44.4397	2.10144	6.58964
ARPC1A	55.365	127.349	-1.0932	-2.20782
ARPC1B	194.449	734.913	-1.80826	-9.80287
ARPC2	614.627	724.964	-0.128165	-0.153147
ARPC3	386.258	761.444	-0.867692	-2.30008
ARPC4	177.541	279.904	-0.54667	-1.0088
ARPC5L	196.27	67.6544	1.64989	3.79606
ARPP19	129.111	141.278	-0.0199154	-0.0163268
ARRB1	39.111	66.9911	-0.666803	-0.710362
ARRB2	248.199	287.863	-0.105163	-0.117665
ARRDC1	35.8843	98.1652	-1.3413	-2.67559
ARRDC2	143.921	20.5616	2.91575	11.4163
ARRDC3	631.917	303.782	1.16611	4.28177
ARSA	53.9339	15.9187	1.86898	3.35794
ARSB	14.7105	19.8984	-0.330625	-0.167593
ARSG	31.6075	7.29607	2.22216	2.7565
ART4	0	10.6125	-7.26709	-3.23517
ARV1	6.96895	21.2249	-1.49019	-1.095
AS3MT	0	18.5718	-8.07445	-5.21571
ASAH1	50.1798	21.8882	1.30364	1.77973
ASAP1	7.33034	253.372	-5.02735	-27.5834
ASB1	27.9602	13.9289	1.11314	1.04681
ASB13	2.18613	49.7459	-4.37904	-7.81728
ASB6	50.1759	43.1131	0.330745	0.246834
ASB7	24.4649	11.2757	1.2289	1.08512
ASB8	61.4096	16.582	1.99761	4.05213
ASCC1	28.4594	49.7459	-0.69545	-0.711211
ASCC2	68.6871	93.5223	-0.337425	-0.34797
ASCC3	132.382	106.125	0.429838	0.566447
ASF1A	36.2386	102.808	-1.39293	-2.86992
ASF1B	6.64804	17.9085	-1.33442	-0.793231
ASH1L	47.3927	3.97967	3.6827	5.71357
ASH2L	24.9573	52.399	-0.957459	-1.08837
ASIP	0	294.496	-12.0615	-19.9766
ASNA1	30.7084	35.817	-0.113628	-0.0666494
ASNS	11.5972	0.663279	4.23944	1.71846
ASPSCR1	14.4152	75.6138	-2.28023	-4.45121
ASRGL1	1.65329	42.4498	-4.51371	-6.64769
ASTE1	77.4636	14.5921	2.5184	6.23092
ASTL	0.976733	13.9289	-3.77121	-2.26095
ASUN	28.8156	103.471	-1.73595	-4.08122
ASXL1	257.144	169.799	0.705869	1.49739
ASXL2	59.8842	89.5426	-0.471427	-0.560893
ATAD1	57.9455	132.656	-1.08379	-2.16902
ATAD2	102.461	220.872	-1.00025	-2.3548
ATAD2B	76.524	68.3177	0.27084	0.247371
ATAT1	11.7525	2.65311	2.25387	1.31492
ATE1	40.2559	53.7256	-0.304779	-0.240514
ATF1	62.0678	69.6443	-0.0568578	-0.0391576
ATF2	91.502	129.339	-0.388604	-0.469904
ATF3	269.987	9.2859	4.97554	19.1868
ATF4	381.733	890.12	-1.11026	-3.52443
ATF5	40.0927	23.2148	0.895041	0.917575
ATF6	57.0921	21.8882	1.49387	2.48959
ATF6B	21.7346	17.9085	0.388049	0.228668
ATF7IP	141.002	153.881	-0.0157473	-0.013116
ATF7IP2	80.2494	0	9.47076	4.53947
ATG10	20.9186	21.8882	0.0428971	0.0202146
ATG101	16.2254	74.9505	-2.09774	-3.90468
ATG12	130.242	104.135	0.43204	0.571563
ATG13	113.332	70.3075	0.798089	1.3756
ATG14	99.1188	31.1741	1.77735	4.67954
ATG16L1	176.112	61.6849	1.62124	4.09345
ATG16L2	51.9504	70.9708	-0.340863	-0.317841
ATG2A	166.953	170.463	0.0807405	0.0677377
ATG2B	10.3599	118.064	-3.40793	-11.5217
ATG3	77.1084	105.461	-0.344222	-0.371789
ATG4B	61.3435	95.5121	-0.530045	-0.6822
ATG4C	10.1145	2.65311	2.04652	0.929828
ATG4D	91.9776	39.1334	1.34088	2.85959
ATG7	56.238	28.521	1.09029	1.55449
ATG9A	73.2588	27.1944	1.53757	2.86003
ATHL1	162.753	45.7662	1.94041	3.77688
ATIC	60.2664	121.38	-0.898949	-1.53084
ATL1	13.5297	0.663279	4.4564	1.87363
ATL2	89.3234	62.3482	0.62612	0.849924
ATL3	58.8894	130.003	-1.03205	-2.08142
ATM	267.487	98.8285	1.54264	3.91379
ATMIN	30.5352	7.95934	2.04881	2.51786
ATOX1	45.5465	70.3075	-0.519508	-0.551022
ATP10A	35.4817	24.5413	0.636944	0.458079
ATP10D	8.11272	65.6646	-2.90878	-5.71033
ATP11A	24.548	33.1639	-0.323752	-0.215089
ATP11B	248.584	420.519	-0.649084	-1.36087
ATP11C	34.6696	16.582	1.17435	1.30386
ATP13A1	49.9985	87.5528	-0.698322	-0.930082
ATP13A2	39.3663	39.7967	0.0922809	0.0543169
ATP13A3	71.4561	109.441	-0.506737	-0.625073
ATP1A1	217.832	287.2	-0.290702	-0.386383
ATP1A3	24.3505	3.97967	2.7193	2.61509
ATP1B1	25.0507	174.442	-2.70121	-6.68981
ATP1B3	116.084	426.488	-1.76742	-6.50459
ATP23	9.08994	11.2757	-0.209371	-0.0719483
ATP2A2	166.265	114.747	0.643989	1.09843
ATP2A3	168.184	157.197	0.205732	0.237733
ATP2B1	188.547	134.646	0.594354	1.03948
ATP2B4	160.15	17.9085	3.27432	10.5249
ATP2C1	59.3465	34.4905	0.890466	1.18127
ATP5A1	163.944	879.507	-2.31541	-16.0274
ATP5B	449.296	707.055	-0.543205	-1.19125
ATP5C1	205.084	462.305	-1.06248	-3.08806
ATP5D	231.052	632.768	-1.34655	-5.11514
ATP5F1	133.982	210.923	-0.544518	-0.908378
ATP5G1	8.79018	76.9403	-3.03853	-6.66955
ATP5G2	181.019	33.1639	2.55643	10.4826
ATP5G3	89.1913	344.905	-1.84328	-7.94504
ATP5I	106.808	32.5007	1.82241	3.96822
ATP5J	112.761	319.7	-1.39298	-4.10369
ATP5J2	63.6685	140.615	-1.03419	-2.21084
ATP5S	20.7288	5.96951	1.90514	1.6279
ATP5SL	20.1475	78.2669	-1.84616	-3.70699
ATP6AP1	70.1956	120.053	-0.6649	-1.00051
ATP6AP2	116.217	125.36	0.0011171	0.000985971
ATP6V0A2	44.4891	73.6239	-0.615377	-0.705447
ATP6V0B	47.0166	40.46	0.324144	0.265257
ATP6V0C	483.011	332.966	0.647053	1.23183
ATP6V0D1	69.3267	63.6747	0.232593	0.209688
ATP6V0E1	103.248	161.177	-0.531297	-0.745872
ATP6V0E2	78.1703	0	9.42916	4.47814
ATP6V1A	33.0556	47.7561	-0.425411	-0.341345
ATP6V1B2	53.147	61.6849	-0.106707	-0.0777812
ATP6V1C1	23.5716	44.4397	-0.802667	-0.768278
ATP6V1D	77.5577	139.289	-0.735559	-1.29463
ATP6V1E1	86.0238	132.656	-0.514636	-0.730951
ATP6V1F	105.311	50.4092	1.17099	2.50164
ATP6V1G1	445.807	58.3685	3.04263	22.375
ATP6V1G2	1.39282	12.6023	-3.08618	-1.7255
ATP6V1H	110.925	128.676	-0.106862	-0.0940483
ATP7A	43.5706	55.0521	-0.228814	-0.178863
ATP8A1	363.644	62.3482	2.65157	15.956
ATP8B2	101.786	77.6036	0.502342	0.632005
ATP8B4	2.72997	211.586	-6.14978	-6.79862
ATP9B	138.859	74.9505	0.998619	2.29196
ATPAF1	15.6642	22.5515	-0.415954	-0.237568
ATPAF2	34.3589	60.3584	-0.704776	-0.812217
ATPIF1	287.684	123.37	1.33086	4.7023
ATR	76.7626	45.1029	0.87845	1.24976
ATRAID	96.5484	33.8272	1.62052	3.78838
ATRN	19.5534	39.1334	-0.886661	-0.800423
ATRNL1	0.299757	10.6125	-5.09043	-0.586587
ATRX	149.053	139.952	0.200054	0.226876
ATXN1	236.031	65.0013	1.97079	7.07669
ATXN10	65.6239	123.37	-0.800024	-1.29445
ATXN1L	41.6382	21.8882	1.03619	1.24578
ATXN2	55.8971	67.6544	-0.168799	-0.122947
ATXN2L	246.198	368.783	-0.475602	-0.840037
ATXN7	217.364	55.7154	2.07143	8.66115
ATXN7L1	90.5469	149.901	-0.616588	-0.965098
ATXN7L2	32.8165	47.0928	-0.414233	-0.345016
ATXN7L3	57.2642	82.9098	-0.425108	-0.474639
ATXN7L3B	116.849	105.461	0.256564	0.277843
AUH	62.2509	80.2567	-0.258144	-0.237204
AUP1	147.021	324.343	-1.0332	-3.01518
AURKA	3.42928	16.582	-2.16905	-1.46218
AURKAIP1	49.7732	155.207	-1.53163	-4.29088
AUTS2	34.9819	9.2859	2.02191	2.63183
AVEN	25.0253	109.441	-2.02106	-5.25019
AVL9	41.6148	139.952	-1.6381	-4.24777
AVPI1	28.8941	16.582	0.910365	0.798103
AXDND1	17.5169	0	7.27363	2.6919
AXIN1	30.0036	116.737	-1.85487	-4.67014
AXIN2	9.6716	68.3177	-2.71222	-5.7241
AZI2	41.66	135.309	-1.58907	-4.16075
AZIN1	480.551	261.332	0.989471	2.98071
B2M	15087.9	12928.6	0.335621	0.485372
B3GALNT2	9.16719	37.8069	-1.94189	-2.33798
B3GALT4	12.3284	28.521	-1.09606	-0.857498
B3GAT1	24.5958	0	7.76197	2.99492
B3GAT3	64.6928	78.2669	-0.16614	-0.140391
B3GLCT	34.9355	3.31639	3.50499	4.31842
B3GNT2	318.595	177.759	0.953423	2.37809
B3GNT5	0.621577	18.5718	-4.87141	-3.5647
B3GNT8	12.5633	0.663279	4.35126	1.81588
B3GNTL1	14.8592	19.2351	-0.257544	-0.118866
B4GALNT1	0.0887369	501.439	-11.8675	-19.7529
B4GALT1	335.66	346.231	0.066859	0.0660093
B4GALT3	44.4174	66.3279	-0.468696	-0.481662
B4GALT4	38.2613	0	8.40276	3.59716
B4GALT5	34.9705	44.4397	-0.238924	-0.166928
B4GALT7	33.0264	27.1944	0.389145	0.286643
B9D2	73.6119	32.5007	1.28686	2.18118
BACE1	1.34821	10.6125	-2.82799	-1.16251
BACH1	75.4597	57.042	0.514438	0.594388
BACH2	193.364	221.535	-0.0927686	-0.0742104
BAD	64.2896	20.5616	1.75261	3.43313
BAG1	99.6343	179.085	-0.737056	-1.29737
BAG2	31.2409	8.62262	1.96757	2.37409
BAG3	67.0627	62.3482	0.213204	0.157905
BAG4	38.2813	37.8069	0.127023	0.0814615
BAG5	101.993	35.1538	1.6478	3.75962
BAG6	115.194	187.708	-0.595731	-1.07275
BAHD1	27.5833	33.1639	-0.157059	-0.093852
BAIAP2	16.1859	76.277	-2.12899	-4.37277
BAIAP3	11.7411	11.939	0.0891503	0.0332895
BAK1	17.4021	63.6747	-1.76872	-2.93117
BAMBI	4.69961	60.3584	-3.56061	-7.21614
BANF1	68.1319	204.953	-1.47736	-3.71554
BANP	51.8686	75.6138	-0.435143	-0.446776
BAP1	75.2213	89.5426	-0.142205	-0.123463
BASP1	0.676976	28.521	-5.28379	-5.50198
BATF	29.1904	66.3279	-1.07952	-1.19635
BAX	59.0979	157.197	-1.30084	-3.03022
BAZ1A	171.145	96.8387	0.930289	2.13386
BAZ1B	48.6605	137.962	-1.39721	-3.09384
BAZ2A	232.889	562.46	-1.16503	-3.94078
BAZ2B	47.3849	74.2872	-0.533445	-0.418129
BBOF1	10.7377	0	6.56638	2.17875
BBS12	12.6852	2.65311	2.3648	1.46773
BBS2	66.7087	18.5718	1.95067	3.51578
BBS4	14.8482	2.65311	2.59635	1.78881
BBS7	10.443	2.65311	2.08883	1.11337
BBS9	22.9332	33.1639	-0.418652	-0.270623
BBX	123.062	75.6138	0.81224	1.535
BCAP29	27.9779	41.7866	-0.469597	-0.381804
BCAP31	38.8478	65.6646	-0.649908	-0.746656
BCAR3	12.5558	3.31639	2.02799	1.16199
BCAS2	256.071	299.802	-0.116704	-0.123301
BCAS3	50.7005	70.3075	-0.363021	-0.35897
BCAT2	9.37226	53.0623	-2.39643	-4.00921
BCCIP	146.707	237.454	-0.584409	-1.06196
BCDIN3D	9.24382	11.2757	-0.172996	-0.0609351
BCKDHA	71.3184	36.4803	1.07511	1.77637
BCKDHB	26.4687	14.5921	0.968557	0.836567
BCKDK	16.0396	43.1131	-1.31515	-1.24232
BCL10	40.8168	220.209	-2.32174	-9.98022
BCL11B	138.284	473.581	-1.67042	-5.69177
BCL2	156.797	194.341	-0.201854	-0.212753
BCL2L1	41.8112	25.2046	0.839625	0.923809
BCL2L11	124.004	762.107	-2.51001	-10.8987
BCL2L12	14.4162	19.8984	-0.359604	-0.185185
BCL2L13	56.4323	70.9708	-0.220343	-0.187374
BCL3	199.528	49.7459	2.11748	5.65613
BCL6	122.786	79.5934	0.738458	1.05009
BCL7A	5.64175	25.2046	-2.03219	-1.38265
BCL7B	135.155	145.258	0.00479227	0.00396814
BCL7C	42.1087	13.9289	1.70645	2.45915
BCL9L	343.228	1.98984	7.53936	15.5512
BCLAF1	590.81	141.278	2.17401	13.5302
BCOR	28.4395	157.86	-2.36977	-7.69081
BCORL1	12.3475	28.521	-1.10759	-0.854167
BCR	52.0911	29.8475	0.913706	1.15985
BCS1L	8.82261	23.878	-1.32331	-1.02862
BDH1	22.3053	72.2974	-1.5817	-2.61731
BDH2	22.6108	0	7.64516	2.983
BDP1	70.0135	38.4702	0.973379	1.51963
BECN1	163.997	145.258	0.284426	0.369982
BEND3	1.44801	35.1538	-4.4358	-5.56193
BEND4	0.499502	182.402	-8.53505	-21.6307
BEND5	11.4552	22.5515	-0.866875	-0.396964
BET1	26.8839	19.2351	0.594679	0.431198
BEX3	18.1583	9.2859	1.07459	0.618469
BFAR	71.9916	100.818	-0.374877	-0.403931
BHLHB9	2.13626	22.5515	-3.29736	-2.8267
BHLHE40	1108.43	36.4803	5.0463	8.74003
BICD1	14.4774	0.663279	4.55412	2.00222
BICD2	18.2235	35.817	-0.867125	-0.743239
BICDL1	25.7798	17.9085	0.632729	0.458079
BID	38.7001	16.582	1.33159	1.59444
BIK	19.3731	7.95934	1.39081	1.01074
BIN3	121.887	51.7357	1.346	3.41402
BIRC2	264.859	3.97967	6.16688	18.898
BIRC3	134.656	131.992	0.139174	0.126265
BIRC5	0.294015	13.9289	-5.32255	-2.91474
BIRC6	205.791	328.323	-0.564626	-1.16976
BIRC8	0	68.3177	-9.9536	-11.696
BLCAP	88.7828	31.8374	1.58822	3.68845
BLM	9.51065	27.8577	-1.43917	-1.29732
BLMH	36.9784	55.7154	-0.485228	-0.446054
BLOC1S2	77.2841	15.9187	2.38725	5.79194
BLOC1S4	50.8977	27.1944	1.01334	1.33447
BLOC1S6	189.881	49.0826	2.06151	8.0838
BLVRA	22.4612	25.2046	-0.054085	-0.026785
BLVRB	33.9492	11.939	1.61464	1.95267
BLZF1	21.009	21.2249	0.098401	0.0433495
BMP2K	8.46178	43.7764	-2.26109	-3.16744
BMS1	70.8105	122.043	-0.673668	-0.929828
BMT2	52.3479	105.461	-0.901454	-1.57337
BNIP1	34.2525	12.6023	1.55199	1.92712
BNIP2	217.292	120.053	0.964952	2.5668
BNIP3	13.5269	6.63279	1.14042	0.640605
BNIP3L	125.653	222.198	-0.714048	-1.48107
BOD1L1	98.787	86.8895	0.294697	0.327494
BOLA1	18.1002	27.8577	-0.510762	-0.341784
BOLA3	31.883	34.4905	-0.00481228	-0.00276162
BOLL	0	35.1538	-8.99502	-8.1785
BORA	9.29935	43.1131	-2.09064	-2.38184
BORCS5	175.78	17.2452	3.46155	11.9265
BORCS6	12.9636	12.6023	0.141771	0.0518872
BPGM	77.1865	33.1639	1.32955	2.46581
BPHL	10.3813	18.5718	-0.727698	-0.406992
BPNT1	10.0326	51.7357	-2.25724	-3.46599
BPTF	97.5178	173.779	-0.725462	-1.32225
BRAF	182.937	76.9403	1.35926	4.1819
BRAP	113.718	157.197	-0.359529	-0.445281
BRAT1	13.9829	27.1944	-0.850059	-0.646465
BRCA2	25.1923	5.30623	2.35546	2.51348
BRCC3	23.5216	59.0318	-1.21798	-1.73644
BRD1	141.743	299.139	-0.96834	-2.60792
BRD2	412.686	80.2567	2.47309	10.8665
BRD3	37.6323	40.46	0.00432742	0.00270057
BRD4	149.574	269.291	-0.741918	-1.42976
BRD7	122.49	116.074	0.1875	0.191154
BRD8	11.397	98.8285	-3.00022	-8.53309
BRD9	109.88	120.053	-0.0185294	-0.0153666
BRDT	1.32636	12.6023	-3.16114	-1.66516
BRE	119.258	134.646	-0.0656511	-0.0557623
BRF1	62.3051	88.2161	-0.39341	-0.408264
BRF2	45.9222	12.6023	1.97403	3.23788
BRI3	63.7654	86.2262	-0.327165	-0.327754
BRI3BP	8.18451	39.7967	-2.17103	-2.85694
BRIP1	8.80657	14.5921	-0.628581	-0.28783
BRIX1	65.5152	81.5833	-0.207671	-0.188762
BRK1	115.595	220.209	-0.820094	-1.8356
BRMS1	84.9735	74.9505	0.289101	0.293365
BRMS1L	39.9157	35.1538	0.290859	0.203048
BRPF1	41.0515	157.197	-1.83129	-5.34717
BRPF3	38.2328	31.1741	0.401531	0.315454
BRWD1	118.609	89.5426	0.512837	0.7033
BRWD3	34.9079	27.8577	0.433243	0.337837
BSCL2	43.3481	73.6239	-0.654902	-0.81121
BSDC1	114.654	92.1957	0.423134	0.560893
BSG	141.077	346.231	-1.18445	-3.5358
BST2	12.2296	148.574	-3.49146	-14.3109
BTAF1	239.258	85.5629	1.59272	5.79609
BTBD1	61.9492	43.1131	0.631651	0.75237
BTBD10	27.9659	26.5311	0.185159	0.108483
BTBD11	101.36	53.7256	1.02037	1.33087
BTBD19	16.2698	34.4905	-0.981148	-0.847356
BTBD2	24.9582	30.5108	-0.18077	-0.104049
BTBD6	19.0711	47.7561	-1.21778	-1.4121
BTBD7	28.7047	72.9607	-1.23606	-1.96203
BTBD9	157.196	68.3177	1.3112	3.64719
BTD	30.1327	19.8984	0.705413	0.54568
BTF3	1130.72	427.815	1.51283	6.55903
BTF3L4	10.1432	126.023	-3.51834	-11.8958
BTG1	7860.49	4424.73	0.93846	2.61949
BTG2	1736.96	689.147	1.44457	6.36506
BTLA	6.65245	72.9607	-3.3293	-7.26026
BTRC	30.4627	29.8475	0.136436	0.0764042
BUB3	148.2	124.696	0.358707	0.488762
BUD13	44.3477	35.1538	0.44571	0.380252
BUD31	248.532	236.79	0.179971	0.218908
BYSL	2.92425	50.4092	-3.99684	-7.24294
BZW1	480.379	269.291	0.947957	2.05859
BZW2	94.436	302.455	-1.56978	-6.02781
C10orf128	26.6236	0	7.88209	3.15406
C10orf2	10.5097	28.521	-1.33601	-1.18333
C10orf54	163.681	1130.23	-2.67908	-22.3998
C10orf76	43.3253	13.9289	1.74825	2.55986
C10orf88	6.35886	32.5007	-2.24331	-2.53684
C11orf1	48.9109	13.9289	1.92301	2.99182
C11orf24	12.7024	18.5718	-0.441356	-0.215755
C11orf31	107.434	39.7967	1.54176	3.83072
C11orf49	17.4113	6.63279	1.50485	1.09982
C11orf54	13.3333	0	6.88455	2.39914
C11orf57	36.5339	53.0623	-0.428284	-0.382429
C11orf58	219.913	78.9302	1.58721	5.4359
C11orf65	60.3485	0	9.06102	4.17241
C11orf68	14.1432	32.5007	-1.0857	-0.962331
C11orf84	8.86239	44.4397	-2.23366	-2.88546
C11orf95	4.90489	13.2656	-1.31999	-0.680364
C12orf10	34.0913	44.4397	-0.271949	-0.200408
C12orf29	52.7971	6.63279	3.10313	5.68003
C12orf4	24.2255	15.2554	0.777736	0.589805
C12orf42	22.9743	0.663279	5.22306	2.546
C12orf43	25.7137	63.0115	-1.18452	-1.73736
C12orf45	23.5365	78.2669	-1.61907	-2.78866
C12orf49	47.1041	51.0725	-0.00724356	-0.00443806
C12orf57	250.99	163.83	0.720732	1.34673
C12orf65	45.132	23.878	1.02547	1.16576
C12orf66	31.4119	20.5616	0.720928	0.630534
C12orf73	32.571	8.62262	2.02677	2.59289
C12orf75	174.657	1.98984	6.56744	11.2374
C14orf1	43.6255	53.0623	-0.172512	-0.125587
C14orf119	28.9494	53.0623	-0.763456	-0.771216
C14orf159	69.5044	28.521	1.39492	2.62592
C14orf166	284.001	325.67	-0.0908803	-0.0881655
C14orf169	47.5477	44.4397	0.206129	0.155801
C14orf2	157.732	193.014	-0.181662	-0.208516
C14orf28	24.8471	13.2656	1.01568	0.864906
C14orf37	312.912	0	11.4326	6.59482
C14orf80	46.1337	12.6023	1.97969	3.19747
C14orf93	10.3928	5.96951	0.906867	0.413808
C15orf39	65.5768	78.9302	-0.158679	-0.134782
C15orf40	19.4602	51.0725	-1.28516	-1.69679
C15orf41	9.13281	11.2757	-0.191579	-0.0675446
C15orf57	60.3098	29.1843	1.15836	1.70922
C15orf61	56.916	25.8679	1.24402	1.64792
C16orf13	64.0576	70.9708	-0.0389419	-0.0269876
C16orf52	11.3026	17.9085	-0.554842	-0.288738
C16orf54	365.288	50.4092	2.96171	15.2594
C16orf58	30.5524	15.2554	1.1099	1.12465
C16orf62	21.668	36.4803	-0.637881	-0.487312
C16orf70	14.4984	72.9607	-2.21939	-4.269
C16orf72	331.583	238.78	0.583952	1.24514
C16orf87	68.2695	140.615	-0.931236	-1.64566
C16orf91	17.3121	39.7967	-1.08701	-1.08038
C17orf107	16.9728	3.31639	2.46502	1.87457
C17orf62	73.9832	59.0318	0.435359	0.490154
C17orf67	11.5909	0	6.67937	2.25711
C17orf75	16.7022	11.939	0.590174	0.325432
C17orf80	3.16286	14.5921	-2.09786	-1.27622
C17orf89	50.1451	35.1538	0.621909	0.670758
C18orf21	83.8551	7.95934	3.50492	8.70843
C18orf25	75.9473	59.0318	0.47339	0.554111
C18orf32	91.0157	98.1652	-4.52664e-05	-4.64621e-05
C18orf54	3.3346	17.2452	-2.24629	-1.52092
C18orf8	76.0349	126.023	-0.620081	-0.857134
C19orf12	28.3885	53.7256	-0.81097	-0.912591
C19orf24	72.4836	17.2452	2.1797	5.02664
C19orf25	15.6472	33.8272	-0.998986	-0.901613
C19orf38	0.26642	240.107	-9.93912	-17.4577
C19orf43	447.532	314.394	0.61931	1.47643
C19orf47	12.0027	27.8577	-1.10919	-0.916447
C19orf52	24.354	36.4803	-0.473898	-0.366325
C19orf53	234.636	248.729	0.0230967	0.021886
C19orf54	16.1574	43.7764	-1.32406	-1.53964
C19orf60	82.4075	48.4193	0.876541	1.43765
C19orf66	119.73	78.2669	0.723019	1.2658
C19orf70	45.1013	129.339	-1.41193	-3.40325
C1D	19.1325	65.6646	-1.66824	-2.82078
C1GALT1	65.3226	52.399	0.42725	0.448582
C1GALT1C1	26.0297	42.4498	-0.594022	-0.508459
C1QBP	125.55	187.045	-0.466892	-0.706197
C1RL	20.2201	0	7.4837	2.85842
C1orf122	30.6422	23.878	0.467179	0.341241
C1orf123	22.7893	36.4803	-0.572179	-0.453352
C1orf131	29.8079	36.4803	-0.182576	-0.114813
C1orf159	11.2705	13.9289	-0.201201	-0.0787142
C1orf162	81.0859	1.32656	6.04322	6.72434
C1orf174	53.3628	22.5515	1.34991	2.04345
C1orf21	76.3911	35.817	1.2019	1.85519
C1orf216	10.0828	0	6.47631	2.11807
C1orf228	47.8664	0	8.71653	3.75648
C1orf27	64.718	21.8882	1.67366	3.22412
C1orf35	35.7133	90.2059	-1.23034	-2.21514
C1orf43	121.371	23.878	2.45442	8.36548
C1orf50	21.7556	11.2757	1.05826	0.806883
C1orf52	143.893	70.9708	1.12916	2.80563
C1orf53	0.149879	19.2351	-7.16328	-4.33225
C20orf194	19.9989	32.5007	-0.594949	-0.4459
C20orf196	21.9844	15.9187	0.575476	0.379292
C20orf27	25.5747	36.4803	-0.403799	-0.297406
C21orf2	59.6378	9.94918	2.6927	5.59124
C21orf91	109.668	195.004	-0.71825	-1.15677
C22orf29	34.865	21.8882	0.780061	0.633739
C22orf39	66.2377	60.3584	0.242114	0.214336
C2CD2	6.20324	11.2757	-0.747505	-0.313659
C2CD2L	19.5971	33.1639	-0.647155	-0.482117
C2CD3	48.5865	57.7052	-0.139049	-0.102391
C2CD5	30.685	20.5616	0.686532	0.582248
C2orf42	105.96	53.0623	1.10705	2.35937
C2orf47	75.4671	38.4702	1.07998	1.79588
C2orf49	53.0128	15.2554	1.90565	3.40907
C2orf68	32.5803	39.7967	-0.177707	-0.107878
C2orf69	36.8561	8.62262	2.20265	3.04747
C2orf76	15.6749	12.6023	0.429433	0.202345
C2orf81	25.1571	0	7.8006	3.06663
C3orf14	1.6813	25.2046	-3.79098	-3.75283
C3orf38	83.0695	68.3177	0.390546	0.435959
C3orf58	59.6654	36.4803	0.819663	0.978997
C4orf3	164.339	43.1131	2.03987	7.63921
C4orf32	45.9982	258.015	-2.3753	-10.2591
C4orf33	33.3772	27.8577	0.370514	0.266424
C4orf46	13.5626	13.2656	0.138927	0.0538074
C4orf47	12.8667	1.32656	3.39048	1.8333
C4orf48	13.6832	0.663279	4.47296	1.91752
C5orf15	46.3945	92.1957	-0.882559	-1.41148
C5orf22	19.9034	24.5413	-0.193448	-0.101988
C5orf24	68.0656	91.5325	-0.320169	-0.310967
C5orf30	4.89424	54.3888	-3.36491	-5.94313
C5orf34	6.75281	153.881	-4.38818	-18.7402
C5orf42	26.4351	51.0725	-0.844138	-0.91667
C5orf45	29.4578	6.63279	2.26094	2.69407
C5orf51	15.6357	47.0928	-1.47426	-1.79253
C6orf106	38.9132	66.3279	-0.661542	-0.597575
C6orf120	37.2263	31.1741	0.367134	0.27605
C6orf136	61.1591	53.7256	0.295297	0.269365
C6orf203	19.2483	9.2859	1.16101	0.86538
C6orf226	64.3929	38.4702	0.849288	1.03156
C6orf47	30.1138	43.1131	-0.410122	-0.329794
C6orf62	383.496	1010.17	-1.29113	-3.77804
C6orf89	84.2744	52.399	0.79481	1.17321
C7orf26	81.8897	48.4193	0.866036	1.37832
C7orf31	20.669	2.65311	3.06837	2.57481
C7orf43	47.1796	66.9911	-0.397537	-0.367854
C7orf49	43.372	7.29607	2.68263	4.08878
C7orf50	51.6485	5.30623	3.391	5.90765
C7orf55	27.6773	13.2656	1.17133	1.13204
C8orf33	44.5773	51.7357	-0.103226	-0.0651453
C8orf59	116.035	127.349	-0.0235044	-0.0174447
C9orf114	32.2768	20.5616	0.760076	0.682453
C9orf142	163.463	56.3787	1.6453	5.20872
C9orf16	142.252	45.1029	1.76563	5.37614
C9orf3	27.9792	29.1843	0.0479212	0.0246778
C9orf40	8.42278	86.8895	-3.25929	-7.1216
C9orf43	13.3846	0.663279	4.44714	1.87124
C9orf64	2.53617	24.5413	-3.18639	-2.73477
C9orf72	37.6807	26.5311	0.61689	0.546113
C9orf78	424.882	112.757	2.0253	10.2335
C9orf85	21.9243	21.8882	0.110888	0.0543169
C9orf91	12.2123	25.2046	-0.933258	-0.669521
CA11	16.8964	0.663279	4.77821	2.22023
CA12	0	19.2351	-8.12508	-5.36232
CA2	7.37474	21.2249	-1.40757	-0.833413
CA5B	91.2002	0.663279	7.21406	5.09182
CAAP1	67.2347	44.4397	0.707666	0.918114
CAB39	87.1719	175.106	-0.897321	-1.97057
CAB39L	11.3701	102.808	-3.07944	-8.83289
CABIN1	127.002	89.5426	0.613189	1.02785
CABLES1	0.410556	12.6023	-4.74696	-2.47818
CABLES2	16.2584	38.4702	-1.13487	-1.19158
CACFD1	3.00703	32.5007	-3.28791	-3.62329
CACNA1A	0	13.9289	-7.65941	-4.11697
CACNA2D2	72.3854	0	9.32423	4.38285
CACNA2D4	16.4041	0	7.17722	2.60337
CACNB1	15.7369	14.5921	0.215944	0.0980488
CACTIN	39.099	67.6544	-0.683832	-0.790348
CACUL1	104.376	126.023	-0.163219	-0.160441
CACYBP	109.779	141.278	-0.253154	-0.27037
CAD	29.6133	112.094	-1.81116	-4.31226
CADM1	29.9204	0.663279	5.60389	3.07716
CAGE1	32.3116	8.62262	2.01452	2.56551
CALCOCO1	31.5405	19.8984	0.774585	0.679984
CALCOCO2	117.273	0	10.018	5.0909
CALCRL	0.177474	112.757	-8.87931	-12.6399
CALHM2	23.934	15.2554	0.758492	0.528774
CALM1	1405.41	1469.83	0.0477303	0.0518872
CALM3	182.058	129.339	0.59895	0.944073
CALR	1262.46	1248.95	0.124718	0.168019
CALU	58.0447	135.972	-1.11922	-2.35484
CAMK1D	92.4297	94.8488	0.0711549	0.0571384
CAMK2D	99.4061	123.37	-0.202419	-0.209707
CAMK2G	63.7261	89.5426	-0.381654	-0.407532
CAMK2N1	46.6283	9.94918	2.33643	3.93299
CAMK4	339.309	313.068	0.219291	0.217051
CAMKK2	11.9292	22.5515	-0.80401	-0.515211
CAMKMT	33.5792	9.2859	1.96545	2.35983
CAMLG	164.558	47.0928	1.91401	6.97998
CAMSAP1	24.5766	19.2351	0.459315	0.292575
CAMSAP2	0.382752	66.9911	-7.14371	-11.5938
CAMTA1	52.4746	21.8882	1.37029	2.16171
CAMTA2	32.0947	19.8984	0.797566	0.730653
CAND1	104.26	79.5934	0.498098	0.673056
CANT1	49.6241	128.676	-1.26485	-2.80756
CANX	268.923	316.384	-0.123757	-0.134688
CAP1	134.508	370.773	-1.35229	-4.56268
CAPG	5.81944	18.5718	-1.55073	-0.859516
CAPN1	75.0057	156.534	-0.952629	-2.01039
CAPN10	31.856	23.2148	0.56594	0.458512
CAPN15	40.7024	50.4092	-0.200089	-0.144408
CAPN2	294.796	33.1639	3.26501	16.4956
CAPN7	64.1236	115.41	-0.740506	-1.01943
CAPNS1	200.049	200.973	0.10346	0.101052
CAPRIN1	195.459	384.702	-0.868679	-2.33891
CAPRIN2	17.8956	10.6125	0.860852	0.557681
CAPZA2	107.421	324.343	-1.48384	-5.24672
CAPZB	187.609	405.927	-1.00501	-3.09548
CARD11	172.133	80.92	1.19652	3.16327
CARD19	43.1667	33.1639	0.486204	0.378722
CARD6	0.760179	107.451	-7.00509	-3.37634
CARF	16.7452	9.94918	0.863151	0.518098
CARHSP1	42.8025	3.31639	3.79695	5.07853
CARM1	23.3111	25.2046	-0.00544503	-0.00276162
CARNMT1	55.1254	41.1233	0.530365	0.51425
CARNS1	16.9951	0.663279	4.78639	2.19757
CARS	64.4292	23.878	1.53947	2.63924
CARS2	88.2617	39.1334	1.28407	2.54501
CASC1	45.8216	0.663279	6.22073	3.79442
CASC3	140.754	154.544	-0.0274301	-0.0212589
CASC4	78.9294	42.4498	1.00381	1.686
CASD1	21.1282	41.1233	-0.846362	-0.745587
CASK	52.7748	5.96951	3.25287	5.93161
CASP2	16.9688	27.1944	-0.575759	-0.38173
CASP3	60.3795	41.7866	0.63991	0.741581
CASP6	3.82289	14.5921	-1.82149	-1.01646
CASP7	37.4391	22.5515	0.840553	0.85666
CASP8	443.955	181.075	1.40481	5.43626
CASP8AP2	18.9158	52.399	-1.357	-1.79045
CASP9	21.6906	11.939	0.970626	0.748367
CASS4	47.8904	1.98984	4.69644	4.81862
CAST	292.974	238.78	0.407099	0.617283
CASZ1	86.037	21.2249	2.1266	4.75831
CAT	29.7244	93.5223	-1.54254	-3.19034
CBARP	0.349623	61.6849	-7.33457	-1.01064
CBFA2T2	50.8387	17.2452	1.66884	2.80631
CBFB	70.3599	140.615	-0.888928	-1.72057
CBL	52.0145	226.841	-2.01512	-8.09871
CBLB	339.087	358.17	0.0317587	0.030564
CBLL1	100.634	96.1754	0.176385	0.158258
CBR4	20.2421	11.2757	0.951504	0.683397
CBX1	21.934	86.8895	-1.87785	-3.7968
CBX3	159.487	94.1856	0.868558	1.85578
CBX4	279.432	294.496	0.0342131	0.0348275
CBX5	72.4687	39.7967	0.974101	1.28983
CBX6	77.3649	31.1741	1.42189	2.73066
CBX7	51.2323	59.0318	-0.0955503	-0.0681624
CBX8	2.7245	16.582	-2.50254	-1.70328
CBY1	16.1364	9.94918	0.803391	0.470867
CC2D1A	24.0271	29.8475	-0.206484	-0.119884
CC2D1B	34.4296	48.4193	-0.383304	-0.313633
CCAR1	148.682	104.798	0.613169	0.995993
CCAR2	127.345	47.7561	1.52398	4.27669
CCDC102A	7.32985	19.2351	-1.28044	-0.863054
CCDC106	17.6559	0	7.28569	2.70875
CCDC107	42.8044	31.8374	0.536842	0.495709
CCDC109B	217.696	7.29607	5.00469	18.3744
CCDC112	15.217	0	7.06982	2.5035
CCDC115	63.0636	49.7459	0.451634	0.478603
CCDC117	25.5803	141.942	-2.36656	-7.38481
CCDC12	96.9889	47.0928	1.15189	2.04533
CCDC120	29.5912	0	8.02964	3.28686
CCDC124	25.7031	53.7256	-0.957203	-1.14939
CCDC125	2.74677	29.8475	-3.33873	-3.77801
CCDC126	6.34275	17.9085	-1.39979	-0.882749
CCDC127	7.13543	88.2161	-3.51238	-9.05096
CCDC130	66.5403	11.939	2.58605	5.63017
CCDC134	42.8384	41.1233	0.165604	0.110788
CCDC136	11.6415	0.663279	4.23934	1.71182
CCDC137	27.4053	28.521	0.0499472	0.0263656
CCDC138	13.9217	8.62262	0.804309	0.42645
CCDC14	42.5993	0.663279	6.11305	3.67282
CCDC141	24.5493	1.32656	4.31644	2.72329
CCDC15	9.8219	22.5515	-1.09514	-0.78378
CCDC157	35.5679	14.5921	1.39415	1.71179
CCDC159	32.2012	0	8.15247	3.39658
CCDC167	14.6337	6.63279	1.25249	0.71822
CCDC171	5.34304	19.8984	-1.77518	-1.26019
CCDC173	82.2534	0.663279	7.06383	4.90833
CCDC174	123.345	57.7052	1.20612	2.72897
CCDC18	29.9709	1.98984	4.02044	3.81485
CCDC180	27.1789	0	7.90749	3.19748
CCDC184	12.7789	0.663279	4.37613	1.84598
CCDC186	115.552	59.6951	1.06358	2.16987
CCDC191	12.7287	13.9289	-0.0181889	-0.00672893
CCDC22	28.1665	29.8475	0.0233985	0.012229
CCDC25	36.512	60.3584	-0.618101	-0.664459
CCDC28A	51.6437	66.9911	-0.268793	-0.22186
CCDC28B	7.80183	11.939	-0.512048	-0.200392
CCDC30	6.2484	17.2452	-1.35493	-0.7922
CCDC34	3.12378	11.2757	-1.72832	-0.809153
CCDC43	55.2839	26.5311	1.16875	1.7655
CCDC47	84.0354	112.094	-0.306789	-0.328071
CCDC50	10.8116	15.9187	-0.451392	-0.159345
CCDC51	11.47	6.63279	0.901937	0.425824
CCDC53	45.0865	93.5223	-0.944717	-1.29799
CCDC57	94.2025	1.32656	6.25691	7.13021
CCDC58	6.82972	34.4905	-2.2136	-2.30777
CCDC59	313.261	82.9098	2.02732	8.21102
CCDC6	58.6793	57.042	0.150443	0.117494
CCDC65	11.6141	0	6.68548	2.24814
CCDC66	68.2891	19.8984	1.88624	3.40325
CCDC69	179.029	31.8374	2.59969	11.0262
CCDC71	37.7624	47.0928	-0.207651	-0.135529
CCDC71L	26.3516	49.0826	-0.792652	-0.737058
CCDC77	22.295	19.8984	0.272874	0.152384
CCDC84	110.173	27.8577	2.09166	6.05159
CCDC86	28.8094	86.2262	-1.47157	-2.87838
CCDC88A	10.138	0.663279	4.03818	1.54033
CCDC88B	125.234	228.168	-0.756777	-1.61777
CCDC88C	266.024	198.984	0.526886	1.00886
CCDC9	43.463	111.431	-1.25129	-2.30416
CCDC90B	57.141	17.2452	1.83787	3.426
CCDC91	105.692	24.5413	2.2156	6.50972
CCDC92	52.8144	27.1944	1.06684	1.51358
CCDC93	151.468	64.338	1.34587	3.46963
CCDC94	91.8464	66.3279	0.577832	0.782491
CCDC97	46.9683	71.6341	-0.499524	-0.512234
CCL25	0	24.5413	-8.47655	-6.42588
CCM2	62.9552	203.627	-1.58219	-4.57963
CCNA2	0.615834	15.2554	-4.44507	-2.69861
CCNB1IP1	22.1442	0	7.61614	2.94129
CCNC	78.7989	52.399	0.6982	1.0029
CCND2	163.12	440.417	-1.32343	-4.51601
CCND3	589.175	288.526	1.13593	3.83905
CCNDBP1	125.251	121.38	0.153774	0.149822
CCNE1	4.7111	31.8374	-2.65814	-2.99527
CCNE2	3.32444	15.9187	-2.18275	-1.22449
CCNG1	117.735	141.278	-0.153545	-0.15557
CCNG2	7.20182	121.38	-3.94287	-13.4893
CCNH	569.573	55.7154	3.46838	21.5704
CCNI	407.208	46.4295	3.23842	20.1584
CCNJ	16.6913	9.2859	0.95243	0.605894
CCNK	271.617	1.98984	7.20273	14.1834
CCNL1	2001.76	510.061	2.08156	16.2335
CCNL2	104.379	187.045	-0.733941	-1.3637
CCNO	0.355157	10.6125	-4.8348	-2.26979
CCNT1	133.657	248.066	-0.783141	-1.7052
CCNT2	75.4095	72.9607	0.156138	0.134132
CCNY	154.092	135.972	0.288955	0.365846
CCNYL1	25.2639	24.5413	0.149597	0.0808581
CCP110	11.5471	7.95934	0.647487	0.297463
CCPG1	70.4543	171.126	-1.17222	-2.90886
CCR4	57.1547	2.65311	4.54012	6.46476
CCR6	39.364	1.98984	4.4226	4.08811
CCR7	462.874	1858.51	-1.89947	-10.5169
CCR9	4.48964	170.463	-5.18287	-21.0639
CCS	24.7804	35.1538	-0.393129	-0.277843
CCSAP	37.428	62.3482	-0.626884	-0.681304
CCSER2	249.405	55.0521	2.28992	10.9914
CCT2	200.374	275.924	-0.351126	-0.464123
CCT3	98.3784	254.699	-1.26156	-3.00775
CCT4	220.355	382.048	-0.686454	-1.55024
CCT5	41.511	569.093	-3.66353	-24.3439
CCT6B	33.8744	2.65311	3.78358	4.26153
CCT7	69.3987	131.329	-0.811009	-1.48437
CCT8	144.826	265.975	-0.767147	-1.75059
CD101	14.4164	5.30623	1.5441	0.82963
CD151	12.4519	9.94918	0.430712	0.191358
CD160	18.4125	26.5311	-0.41387	-0.214454
CD164	426.765	1045.99	-1.18139	-4.1925
CD2	229.745	326.996	-0.396903	-0.520661
CD22	0.771455	11.2757	-3.83855	-1.88082
CD226	115.389	59.6951	1.06401	1.6736
CD244	38.9237	3.97967	3.39932	4.2636
CD247	401.478	758.127	-0.807205	-2.3613
CD248	11.2944	0	6.63506	2.09761
CD27	76.7966	573.073	-2.79361	-9.81375
CD274	13.1465	61.6849	-2.12786	-3.29703
CD28	106.01	556.491	-2.28258	-9.87617
CD2AP	109.903	118.727	-0.00130012	-0.000990179
CD2BP2	37.7731	43.1131	-0.0834044	-0.0504885
CD320	33.8944	25.2046	0.532538	0.378679
CD37	785.443	400.62	1.08002	4.22499
CD38	5.5264	16.582	-1.46244	-0.787343
CD3D	393.15	669.911	-0.658748	-1.61929
CD3E	882.176	1495.03	-0.649273	-1.24099
CD3EAP	6.19875	27.8577	-2.0674	-1.81803
CD3G	423.492	1339.82	-1.54943	-5.49869
CD40LG	10.6882	1.98984	2.53463	1.29847
CD44	1902.3	150.564	3.77145	40.4935
CD46	235.35	0.663279	8.58108	7.25617
CD47	236.224	528.633	-1.05329	-3.61503
CD48	767.12	236.79	1.80484	10.7556
CD5	540.407	404.6	0.524191	1.08776
CD53	448.813	1846.57	-1.92815	-10.7075
CD6	519.662	298.475	0.908095	2.30493
CD63	74.8477	0	9.37008	4.43924
CD69	2145.87	658.636	1.81831	6.12889
CD7	513.551	448.376	0.302044	0.440964
CD72	11.908	86.2262	-2.7486	-6.95236
CD74	1042.68	431.794	1.38357	6.12896
CD79A	14.496	47.7561	-1.60537	-1.4515
CD79B	4.6272	44.4397	-3.12623	-4.34401
CD81	317.173	13.9289	4.62056	23.0441
CD82	78.7293	102.808	-0.2726	-0.222253
CD83	255.187	25.8679	3.41543	15.9839
CD84	82.1265	221.535	-1.32139	-3.52863
CD86	0.0887369	29.8475	-7.79716	-5.95333
CD8A	1513.47	1083.13	0.594483	1.37592
CD8B	22.1224	2091.32	-6.44292	-110.456
CD9	3.70082	44.4397	-3.46531	-5.22408
CD96	257.179	318.374	-0.195371	-0.191154
CD99L2	14.2818	7.95934	0.953617	0.5374
CDADC1	31.5421	80.2567	-1.24201	-1.89951
CDAN1	25.6368	52.399	-0.924801	-1.063
CDC123	72.7831	36.4803	1.10519	1.91381
CDC14A	441.193	38.4702	3.63212	22.9928
CDC14B	9.42745	30.5108	-1.5845	-1.57726
CDC16	23.699	37.8069	-0.56201	-0.446939
CDC20	1.00433	12.6023	-3.53469	-1.99998
CDC23	17.4296	13.9289	0.432277	0.22814
CDC25A	0.532631	27.8577	-5.54886	-5.52885
CDC25B	215.978	82.9098	1.49185	5.03503
CDC26	38.9975	17.2452	1.28693	1.62682
CDC27	66.3987	90.8692	-0.343814	-0.370399
CDC37	268.564	269.291	0.105917	0.116389
CDC37L1	75.9403	88.8793	-0.117587	-0.0991112
CDC40	122.844	158.524	-0.256942	-0.283792
CDC42	323.435	356.844	-0.0313716	-0.0265932
CDC42EP3	2.57463	76.9403	-4.79029	-12.3699
CDC42SE1	451.728	308.425	0.661176	1.56286
CDC42SE2	728.238	192.351	2.0294	13.2457
CDC45	1.86452	19.8984	-3.3248	-2.70636
CDC5L	95.4487	39.1334	1.39605	3.09304
CDC7	11.1525	12.6023	-0.0614631	-0.022232
CDC73	157.355	126.023	0.430165	0.639489
CDCA3	0.710314	10.6125	-3.82345	-1.87184
CDCA4	33.2793	80.2567	-1.16503	-1.666
CDCA7L	5.5526	29.1843	-2.26754	-1.48669
CDH24	2.85765	13.2656	-2.11992	-0.953363
CDIP1	39.5691	74.2872	-0.797159	-1.00519
CDIPT	33.8256	116.737	-1.67668	-4.16047
CDK10	26.7443	28.521	0.0176923	0.00883678
CDK12	105.662	113.421	0.0083513	0.00640725
CDK13	224.829	148.574	0.706012	1.49671
CDK16	117.54	63.0115	1.00843	1.9367
CDK17	544.366	388.681	0.598849	1.19535
CDK19	27.1676	89.5426	-1.61624	-2.99492
CDK2	14.0332	27.1944	-0.845253	-0.640207
CDK2AP2	54.5668	331.639	-2.49318	-13.5637
CDK4	15.2537	120.053	-2.86664	-9.4192
CDK5	5.34325	57.7052	-3.30895	-6.31708
CDK5RAP1	100.099	26.5311	2.02588	5.4668
CDK5RAP2	56.8984	22.5515	1.44429	2.46638
CDK5RAP3	68.3833	43.1131	0.773649	1.07191
CDK6	54.0679	3.31639	4.13866	6.19756
CDK7	46.3222	61.0216	-0.287878	-0.246997
CDK8	27.1452	52.399	-0.840768	-0.96058
CDK9	84.3104	51.0725	0.831098	1.29127
CDKAL1	136.171	84.2364	0.80293	1.34117
CDKL3	34.3302	6.63279	2.48166	3.36332
CDKL5	10.4488	3.97967	1.49843	0.775202
CDKN1A	236.672	33.8272	2.92116	11.5418
CDKN1B	470.552	879.507	-0.794452	-2.39511
CDKN2AIP	114.301	82.2466	0.584521	0.903085
CDKN2AIPNL	52.3598	128.676	-1.18885	-2.61943
CDKN2C	14.1448	7.95934	0.938619	0.519594
CDNF	8.42249	17.9085	-0.973532	-0.564303
CDON	0.648963	33.1639	-5.39416	-5.75558
CDPF1	7.03009	10.6125	-0.481069	-0.183295
CDR2	98.1721	25.2046	2.06993	5.58973
CDS2	123.822	133.982	-0.00434356	-0.00352486
CDT1	0.0887369	155.207	-10.1757	-13.6414
CDV3	479.776	222.862	1.21695	4.5357
CDYL2	20.471	53.0623	-1.26699	-1.57231
CEBPA	22.4303	1.98984	3.59913	2.68166
CEBPB	83.3796	170.463	-0.923238	-1.93997
CEBPG	66.4323	36.4803	0.973708	1.49733
CEBPZ	213.1	238.78	-0.0514221	-0.0432114
CEBPZOS	26.1292	7.95934	1.8273	1.85188
CECR5	20.7409	68.3177	-1.60743	-2.75377
CELF1	88.5013	142.605	-0.580103	-0.881142
CELF2	584.406	315.057	1.00049	3.51693
CELSR1	0.887787	29.1843	-4.92019	-5.43216
CENPA	58.8113	90.8692	-0.519746	-0.62788
CENPB	58.4227	46.4295	0.440181	0.444966
CENPC	379.181	36.4803	3.48447	21.5598
CENPF	14.1946	2.65311	2.52694	1.69528
CENPH	12.1349	1.98984	2.72001	1.58835
CENPJ	7.13619	25.8679	-1.74889	-1.47275
CENPK	37.8013	17.2452	1.24343	1.21254
CENPL	12.3132	49.7459	-1.90593	-2.76803
CENPM	147.35	7.95934	4.32047	14.4504
CENPN	44.3222	3.31639	3.84938	5.15573
CENPO	7.44639	26.5311	-1.72094	-1.57387
CENPP	19.1548	7.29607	1.50368	1.19535
CENPQ	4.08413	70.3075	-3.98906	-7.55152
CENPT	69.5184	12.6023	2.57234	5.8481
CENPV	15.0694	5.30623	1.61699	1.07577
CENPW	3.25713	17.2452	-2.29792	-1.58874
CEP104	27.7598	23.878	0.329826	0.203101
CEP120	114.668	99.4918	0.314051	0.375804
CEP126	10.5768	0	6.54235	2.15665
CEP128	27.7448	19.2351	0.637691	0.491836
CEP135	29.2208	28.521	0.144199	0.0828217
CEP152	15.6319	19.8984	-0.240818	-0.115512
CEP164	25.7738	31.8374	-0.194889	-0.11633
CEP170	25.3405	33.1639	-0.276465	-0.173882
CEP19	47.6049	11.2757	2.18921	3.53987
CEP192	47.0334	60.3584	-0.250364	-0.204265
CEP250	12.4294	77.6036	-2.5363	-5.66732
CEP290	29.0038	0	8.00044	3.26556
CEP295	33.6087	94.8488	-1.3842	-2.58076
CEP350	117.092	109.441	0.20827	0.205972
CEP41	7.59543	19.2351	-1.22278	-0.747441
CEP44	53.8857	29.8475	0.960589	1.30141
CEP57	106.978	83.5731	0.464967	0.621543
CEP57L1	5.73196	15.2554	-1.30222	-0.7508
CEP63	32.533	44.4397	-0.34192	-0.266424
CEP68	30.4548	37.8069	-0.202715	-0.118878
CEP70	19.459	10.6125	0.986261	0.69683
CEP76	24.5158	20.5616	0.361069	0.220974
CEP78	59.2524	9.94918	2.68455	5.40903
CEP83	26.2843	49.0826	-0.78953	-0.831814
CEP85	15.9033	37.8069	-1.14151	-1.18799
CEP85L	197.722	0.663279	8.32707	6.83066
CEP89	10.7923	7.95934	0.548745	0.233676
CEP95	141.82	33.8272	2.17516	7.34822
CEP97	17.3856	116.074	-2.63279	-7.01847
CEPT1	34.4061	73.6239	-0.984724	-1.27618
CERCAM	2.44169	11.939	-2.18019	-1.04572
CERK	84.3544	115.41	-0.342096	-0.394033
CERS2	81.0655	156.534	-0.840822	-1.63445
CERS4	15.7095	23.2148	-0.457999	-0.267767
CERS5	59.6565	78.2669	-0.282918	-0.271215
CERS6	30.8685	22.5515	0.560048	0.319842
CETN2	12.7907	89.5426	-2.703	-6.67456
CETN3	11.5851	104.798	-3.05702	-8.63413
CFAP20	167	59.6951	1.5884	3.92711
CFAP36	81.4564	37.1436	1.24196	2.45484
CFAP43	2.09739	84.8997	-5.21331	-14.4539
CFAP54	12.1965	0	6.75362	2.3176
CFAP70	14.0591	0	6.95903	2.43645
CFAP97	46.0323	23.2148	1.09734	1.43675
CFDP1	60.1573	137.962	-1.08956	-2.27263
CFL1	1503.1	3986.97	-1.29625	-6.22856
CFL2	67.082	23.878	1.59543	2.53437
CFLAR	262.151	49.0826	2.5269	12.8314
CGGBP1	121.821	261.332	-0.991956	-2.67846
CGRRF1	60.1108	23.878	1.44252	2.46053
CHAC2	11.1652	9.94918	0.273803	0.102557
CHAF1A	29.0154	6.63279	2.23461	2.46212
CHAMP1	28.846	31.1741	-0.00179097	-0.000985971
CHCHD1	18.4773	31.8374	-0.67512	-0.525804
CHCHD10	113.716	90.2059	0.441762	0.570809
CHCHD2	206.652	33.1639	2.75071	10.7314
CHCHD3	71.1908	122.707	-0.67552	-1.07816
CHCHD5	30.2029	23.2148	0.488644	0.36792
CHCHD6	11.2586	1.98984	2.60976	1.46167
CHCHD7	68.2819	84.8997	-0.203493	-0.170705
CHD1	57.6364	224.188	-1.85467	-4.28923
CHD1L	28.8655	53.7256	-0.788769	-0.887835
CHD2	1994.28	606.237	1.82405	11.1559
CHD3	139.748	121.38	0.310155	0.360399
CHD4	220.9	289.189	-0.278194	-0.296216
CHD6	180.907	32.5007	2.58601	11.0111
CHD7	41.3121	70.3075	-0.66112	-0.745046
CHD8	100.239	6.63279	4.02616	10.9062
CHD9	76.9015	44.4397	0.902443	1.2374
CHEK2	10.8594	9.2859	0.332042	0.130361
CHERP	89.8755	133.982	-0.467949	-0.642755
CHFR	77.5856	108.114	-0.369929	-0.434104
CHIC1	27.6215	1.32656	4.4901	3.49677
CHIC2	285.938	186.381	0.727109	1.71593
CHID1	11.5408	13.9289	-0.161402	-0.0614247
CHKA	55.8629	152.554	-1.33789	-2.9302
CHM	23.2436	56.3787	-1.16475	-1.46819
CHMP1A	59.5869	45.7662	0.488223	0.4661
CHMP2A	54.9239	98.8285	-0.738854	-1.10897
CHMP2B	87.9451	69.6443	0.446622	0.537868
CHMP4B	106.547	255.362	-1.15286	-3.0606
CHMP5	40.3833	65.6646	-0.590784	-0.650381
CHMP6	14.5367	13.9289	0.176527	0.0695178
CHMP7	125.78	21.8882	2.61202	1.19593
CHN2	57.5743	6.63279	3.22927	5.65085
CHORDC1	155.653	284.547	-0.75962	-1.62088
CHP1	85.1854	131.992	-0.522706	-0.679289
CHPF	14.3947	35.1538	-1.18335	-1.11792
CHPF2	52.2195	46.4295	0.278154	0.232734
CHPT1	29.0094	8.62262	1.86024	2.15699
CHRAC1	125.206	75.6138	0.8365	1.6328
CHRNE	12.5577	9.2859	0.539538	0.24479
CHST10	16.9857	23.2148	-0.342273	-0.188652
CHST11	126.461	17.2452	2.98379	10.7646
CHST12	24.6196	45.7662	-0.78404	-0.794933
CHST15	0.505036	39.7967	-6.31902	-7.73237
CHST7	31.0919	0	8.10025	3.34092
CHSY1	50.3759	82.9098	-0.612066	-0.677653
CHTF8	52.3175	163.83	-1.5369	-4.05635
CHTOP	97.8194	60.3584	0.802855	1.11374
CHUK	60.527	105.461	-0.691114	-1.04408
CHURC1	104.923	50.4092	1.16614	2.24558
CIAO1	54.7274	61.0216	-0.0482861	-0.0341615
CIAPIN1	25.1963	46.4295	-0.770055	-0.770744
CIART	1.44822	37.1436	-4.5642	-6.34321
CIB1	264.308	41.7866	2.77126	15.2141
CIC	63.211	115.41	-0.761105	-1.16399
CIDEB	35.2032	0	8.28056	3.50325
CIITA	15.5491	2.65311	2.66216	1.8087
CINP	16.5199	21.2249	-0.25098	-0.119496
CIPC	16.8921	47.7561	-1.39658	-1.66198
CIR1	198.538	11.939	4.16671	16.4582
CIRBP	1032.1	231.484	2.2629	12.2016
CISD1	9.12811	23.2148	-1.23872	-0.937923
CISD2	64.2072	191.688	-1.46864	-4.29481
CISH	40.8161	30.5108	0.531988	0.387075
CITED2	673.404	1189.92	-0.711718	-1.78371
CITED4	71.3957	0.663279	6.85676	4.5357
CIZ1	117.027	78.2669	0.688236	1.07061
CKAP2	97.5423	12.6023	3.0628	8.70862
CKAP4	29.1973	2.65311	3.56966	3.7412
CKAP5	38.625	38.4702	0.11828	0.0689851
CKLF	49.2803	56.3787	-0.0827879	-0.0540493
CKS2	22.1248	122.043	-2.36372	-6.20537
CLASP1	127.445	40.46	1.76447	5.01907
CLASP2	73.8496	101.482	-0.349728	-0.397774
CLASRP	98.5627	83.5731	0.345107	0.370637
CLCC1	19.9522	25.2046	-0.225932	-0.11848
CLCF1	39.161	95.5121	-1.18127	-1.87225
CLCN2	1.89232	11.939	-2.5652	-1.34935
CLCN3	119.498	70.3075	0.87697	1.49131
CLCN4	0.0887369	88.8793	-9.37139	-10.8947
CLCN5	6.44738	21.2249	-1.60528	-1.19535
CLCN6	12.2794	23.878	-0.851032	-0.586982
CLCN7	39.5337	30.5108	0.481361	0.386739
CLDND1	126.5	56.3787	1.27702	2.93922
CLEC16A	52.1241	61.6849	-0.13325	-0.0988164
CLIC1	239.457	475.571	-0.874055	-1.53055
CLIC3	28.1	0	7.9569	3.23481
CLIC4	2.23067	35.1538	-3.85217	-4.36089
CLIC5	13.1025	1.32656	3.41562	1.77361
CLINT1	134.247	505.418	-1.80382	-9.07683
CLIP1	54.9832	63.0115	-0.0876348	-0.0636827
CLIP4	43.94	0	8.60177	3.77544
CLK1	1097.88	549.195	1.10811	4.45586
CLK2	36.7764	102.145	-1.36364	-2.74253
CLK3	82.2927	31.8374	1.47715	2.93856
CLK4	111.625	270.618	-1.1682	-3.50325
CLN6	22.3059	47.0928	-0.969479	-1.07236
CLNS1A	79.1731	104.135	-0.286631	-0.292594
CLOCK	10.9089	44.4397	-1.91119	-2.46292
CLP1	23.3671	72.9607	-1.5372	-2.68823
CLPB	17.9547	29.1843	-0.590191	-0.39174
CLPP	92.4258	39.7967	1.32327	2.75377
CLPTM1	86.7965	96.8387	-0.0500491	-0.0396662
CLPTM1L	33.5383	124.033	-1.78175	-4.45875
CLPX	38.4102	23.2148	0.834706	0.866029
CLSTN1	220.84	21.2249	3.49012	17.3326
CLSTN3	35.5188	0	8.29376	3.51825
CLTA	142.197	644.044	-2.06976	-12.3888
CLTB	137.255	71.6341	1.04767	2.31009
CLTC	140.743	288.526	-0.927518	-2.23115
CLU	10.4227	2.65311	2.07733	0.965053
CLUH	53.5163	72.9607	-0.340239	-0.296858
CLYBL	12.6952	19.2351	-0.485883	-0.25551
CMAS	9.92632	96.1754	-3.15624	-8.77441
CMC1	75.8148	66.9911	0.289716	0.267155
CMC2	179.771	21.8882	3.15002	12.7303
CMC4	38.4003	29.1843	0.502555	0.404348
CMIP	261.592	273.934	0.0451856	0.0414977
CMPK1	211.695	95.5121	1.2577	3.94132
CMPK2	7.41305	18.5718	-1.21181	-0.782434
CMSS1	133.186	41.7866	1.78179	5.09182
CMTM3	71.146	10.6125	2.85555	6.31728
CMTM6	95.297	126.686	-0.301149	-0.352045
CMTM7	99.8824	114.084	-0.0836109	-0.0707851
CMTM8	12.7839	0	6.82282	2.36133
CMTR1	71.2977	140.615	-0.87246	-1.60484
CMTR2	23.0444	23.2148	0.0992297	0.0504474
CNBD2	0	41.1233	-9.22129	-8.97579
CNBP	493.907	1134.87	-1.09019	-4.21897
CNDP2	43.5018	21.2249	1.14566	1.45428
CNEP1R1	28.9031	30.5108	0.031996	0.0173224
CNIH1	76.4893	101.482	-0.298314	-0.318504
CNIH4	15.241	19.2351	-0.226127	-0.0980009
CNKSR2	14.5675	0	7.00346	2.34487
CNN2	393.329	502.102	-0.242573	-0.336965
CNN3	9.0819	42.4498	-2.10527	-2.21514
CNNM2	26.2948	11.939	1.24775	1.15385
CNNM3	42.6084	21.2249	1.11407	1.3806
CNNM4	21.2076	35.1538	-0.618675	-0.497933
CNOT1	250.65	149.238	0.856988	2.09761
CNOT10	66.0546	108.778	-0.609172	-0.841558
CNOT11	43.9137	64.338	-0.441623	-0.444876
CNOT2	265.858	158.524	0.855277	2.25005
CNOT3	40.5783	69.6443	-0.670917	-0.809564
CNOT4	126.042	151.891	-0.158354	-0.150878
CNOT6	33.7314	87.5528	-1.26715	-2.34925
CNOT6L	142.348	171.789	-0.162467	-0.174376
CNOT7	72.1045	116.737	-0.585401	-0.818163
CNOT8	159.46	66.3279	1.37306	3.81485
CNOT9	89.1201	51.7357	0.894055	1.55536
CNP	21.9718	222.198	-3.22232	-13.9877
CNPPD1	68.7653	216.229	-1.54548	-4.30148
CNPY3	79.3488	44.4397	0.943445	1.39003
CNPY4	29.5299	24.5413	0.378148	0.255065
CNR2	8.17897	45.1029	-2.35118	-3.43965
CNST	115.35	69.6443	0.836838	1.38848
CNTRL	93.809	258.679	-1.35458	-4.45007
COA3	4.28332	31.8374	-2.76753	-3.08543
COA4	30.4636	6.63279	2.30885	2.85443
COA5	50.2784	61.6849	-0.185108	-0.145879
COA6	17.9674	38.4702	-0.99256	-0.97191
COA7	2.50816	31.8374	-3.56004	-4.24386
COASY	28.7695	31.8374	-0.0350122	-0.0189223
COG1	61.258	61.0216	0.114344	0.0861461
COG2	40.6164	26.5311	0.724603	0.728008
COG3	145.168	53.7256	1.54537	4.18727
COG4	25.7247	44.4397	-0.678605	-0.640207
COG5	163.342	87.5528	1.00776	2.32162
COG6	29.7147	37.1436	-0.213921	-0.139515
COG7	18.7001	8.62262	1.22165	0.865639
COIL	43.2981	22.5515	1.05217	1.24905
COL4A3BP	55.8566	105.461	-0.809439	-1.27382
COL6A2	143.942	0	10.3171	4.4108
COLGALT1	33.1418	60.3584	-0.753503	-0.85802
COLQ	12.2235	0.663279	4.32036	1.56285
COMMD10	51.7585	25.8679	1.11221	1.4204
COMMD2	32.3662	16.582	1.07659	1.07236
COMMD3	46.4332	103.471	-1.04608	-1.89735
COMMD4	5.23238	68.3177	-3.57654	-6.61274
COMMD5	17.701	7.29607	1.3853	1.0236
COMMD6	367.575	49.7459	2.99261	18.0895
COMMD7	45.6387	73.6239	-0.580643	-0.687537
COMMD8	22.2345	144.595	-2.59088	-8.91234
COMMD9	79.4698	3.31639	4.69222	8.69447
COMT	22.8764	19.8984	0.313615	0.17363
COMTD1	15.6654	42.4498	-1.3364	-1.49468
COPA	142.552	170.463	-0.147693	-0.152038
COPB1	102.392	148.574	-0.430948	-0.477373
COPB2	31.84	122.707	-1.83711	-4.75868
COPE	184.254	110.104	0.851204	1.95267
COPG1	71.6372	127.349	-0.723088	-1.08574
COPG2	11.5964	35.1538	-1.48278	-1.50398
COPS2	209.006	78.2669	1.52761	3.74506
COPS3	86.303	117.4	-0.336156	-0.377148
COPS4	59.0026	76.9403	-0.271823	-0.234781
COPS5	68.9374	93.5223	-0.331755	-0.349848
COPS6	23.6105	39.1334	-0.623663	-0.500075
COPS7A	17.5125	18.5718	0.0197744	0.00802701
COPS7B	57.4582	33.1639	0.902038	1.24635
COPS8	137.43	120.717	0.296275	0.367854
COPS9	90.8774	104.798	-0.0927727	-0.0669463
COPZ1	78.8485	327.66	-1.94418	-8.21514
COQ10A	39.2764	0	8.43808	3.63078
COQ10B	167.176	357.507	-0.986501	-2.75945
COQ2	28.9177	23.878	0.387603	0.233762
COQ4	54.8483	7.29607	3.01615	5.21124
COQ5	21.9446	36.4803	-0.623229	-0.493686
COQ6	47.6864	18.5718	1.47015	2.24814
COQ7	33.3322	19.2351	0.902541	0.894221
COQ9	10.926	45.7662	-1.958	-2.71896
CORO1A	637.518	1793.51	-1.38265	-7.13415
CORO1B	6.38092	120.053	-4.11203	-14.9614
CORO1C	15.6944	47.7561	-1.50447	-1.55743
CORO2A	8.94455	13.9289	-0.53234	-0.234574
COTL1	329.341	1164.05	-1.71241	-8.39201
COX10	20.9254	39.7967	-0.822182	-0.768159
COX11	37.3823	15.9187	1.33997	1.66868
COX14	129.64	110.104	0.344185	0.421369
COX15	16.7574	22.5515	-0.315959	-0.167102
COX16	86.346	72.2974	0.367927	0.359034
COX18	29.1203	37.1436	-0.239165	-0.152008
COX19	104.675	17.9085	2.65374	7.58428
COX20	65.4873	94.1856	-0.414301	-0.47759
COX4I1	508.502	580.369	-0.0840571	-0.0940483
COX5A	116.359	248.066	-0.983428	-2.17457
COX6A1	149.673	898.743	-2.47595	-17.4939
COX6B1	230.098	206.943	0.261599	0.359925
COX6C	250.245	211.586	0.351676	0.501137
COX7A2	111.81	80.2567	0.587382	0.911744
COX7A2L	69.8492	165.82	-1.13822	-2.27615
COX7C	419.806	275.924	0.712601	1.70125
CPD	99.3183	13.2656	3.01321	8.12648
CPEB2	247.473	90.8692	1.55938	4.12042
CPEB3	14.7157	3.31639	2.2589	1.58923
CPEB4	85.4599	5.96951	3.94713	8.87742
CPM	0.0887369	39.1334	-8.18795	-7.09214
CPNE1	147.569	119.39	0.41457	0.596307
CPNE2	12.1681	1.32656	3.30865	1.76828
CPNE3	50.6822	30.5108	0.844075	0.915716
CPNE8	10.969	0	6.60366	2.18169
CPOX	15.9424	23.878	-0.479444	-0.276797
CPPED1	14.289	12.6023	0.29064	0.12663
CPQ	41.3643	14.5921	1.60932	2.01661
CPSF1	64.8225	96.8387	-0.470407	-0.508863
CPSF2	36.4622	82.2466	-1.06456	-1.7266
CPSF3	25.7176	131.329	-2.23629	-5.90306
CPSF3L	98.2458	52.399	1.01441	1.8744
CPSF4	10.7091	39.7967	-1.78448	-2.19419
CPSF6	146.682	117.4	0.429051	0.570814
CPSF7	75.5794	79.5934	0.034799	0.0266377
CPT1A	27.414	43.7764	-0.569924	-0.445569
CPT2	26.8107	12.6023	1.20035	1.11333
CPTP	19.9585	21.2249	0.0232877	0.0104444
CRACR2A	61.043	1.32656	5.63433	5.56351
CRADD	34.6196	33.8272	0.140681	0.0862578
CRAMP1	19.8593	7.95934	1.4262	1.15284
CRAT	11.6745	3.31639	1.92553	1.12781
CRBN	199.668	114.747	0.907366	1.94427
CRCP	96.6936	54.3888	0.940156	1.60348
CREB1	205.296	250.719	-0.178074	-0.209976
CREB3	18.967	57.7052	-1.50174	-2.18331
CREB3L2	37.1235	6.63279	2.59622	3.49029
CREBBP	169.209	15.9187	3.51804	13.3772
CREBL2	49.882	22.5515	1.25589	1.72641
CREBRF	129.256	93.5223	0.574522	0.882602
CREBZF	112.337	179.749	-0.56881	-0.984072
CREG1	20.6175	39.1334	-0.811318	-0.683267
CRELD1	66.9076	19.2351	1.90875	3.92909
CRELD2	26.274	29.8475	-0.0783643	-0.0409518
CREM	391.585	541.235	-0.351726	-0.4075
CRIM1	10.8477	47.7561	-2.02574	-2.96168
CRIP2	10.8703	3.31639	1.81499	0.886384
CRIPT	75.6305	131.329	-0.684997	-1.03472
CRK	37.7808	82.9098	-1.02544	-1.55854
CRKL	78.4063	114.084	-0.432223	-0.552284
CRLF2	0	68.3177	-9.9536	-11.696
CRLF3	76.919	124.033	-0.581964	-0.761082
CRLS1	47.9717	36.4803	0.504096	0.472872
CRNKL1	121.025	73.6239	0.82662	1.56863
CROT	10.4537	59.0318	-2.38895	-4.03783
CRTAM	83.0879	31.1741	1.5242	3.02568
CRTAP	43.8144	7.95934	2.56945	4.21897
CRTC1	9.12181	11.2757	-0.197728	-0.0681624
CRTC2	156.753	162.503	0.0568764	0.0518872
CRTC3	86.3754	85.5629	0.118031	0.0808581
CRY1	213.142	66.9911	1.78176	6.06671
CRY2	164.149	37.1436	2.25297	8.7931
CRYL1	17.8166	23.878	-0.310966	-0.171455
CRYZ	15.3647	3.31639	2.32859	1.41357
CRYZL1	20.8701	18.5718	0.278484	0.145585
CSAD	36.848	0	8.34661	3.5497
CSDE1	753.226	419.855	0.95149	3.32596
CSE1L	37.5438	86.8895	-1.10534	-1.6214
CSF1R	0.238616	12.6023	-5.68307	-2.7637
CSGALNACT1	23.4224	0	7.68954	2.90305
CSGALNACT2	108.01	17.2452	2.75605	8.25712
CSK	220.022	333.629	-0.49287	-0.905528
CSNK1A1	127.435	567.767	-2.04628	-11.9931
CSNK1D	156.603	216.892	-0.361956	-0.429754
CSNK1E	37.7555	11.939	1.76849	2.40339
CSNK1G1	30.4078	78.9302	-1.26854	-2.18799
CSNK1G2	206.452	225.515	-0.0193162	-0.0184171
CSNK1G3	107.364	121.38	-0.0680574	-0.0543169
CSNK2A2	97.7767	47.0928	1.16281	2.45045
CSNK2B	172.99	232.811	-0.319227	-0.458512
CSPP1	38.6698	38.4702	0.119497	0.0711541
CSRNP1	672.541	4.64295	7.29073	30.2331
CSRNP2	32.6449	34.4905	0.0254514	0.0128289
CSRP1	58.0373	171.126	-1.45103	-3.91937
CST3	6.9242	110.104	-3.86195	-11.1937
CST7	1080.71	270.618	2.11169	10.2412
CSTB	168.449	70.9708	1.3551	3.96562
CSTF1	25.3576	46.4295	-0.760432	-0.753757
CSTF2	22.3887	61.0216	-1.33212	-1.84335
CSTF2T	53.6238	54.3888	0.0900493	0.0627406
CSTF3	27.7151	44.4397	-0.568456	-0.480709
CTB-133G6.1	138.463	381.385	-1.35404	-4.17677
CTB-50L17.10	10.6643	138.625	-3.58771	-12.0252
CTBP1	168.291	194.341	-0.0992102	-0.10028
CTBS	97.0726	17.2452	2.59892	6.77612
CTC1	118.13	23.878	2.41535	8.09731
CTCF	96.4434	262.658	-1.33719	-4.24777
CTDNEP1	212.395	152.554	0.586807	1.14613
CTDP1	129.495	68.3177	1.03458	1.97833
CTDSP1	99.0424	114.084	-0.0942798	-0.0828217
CTDSP2	136.947	150.564	-0.0276229	-0.0234359
CTDSPL2	149.755	95.5121	0.757672	1.49907
CTH	41.1957	0	8.50881	3.69837
CTLA4	15.986	167.146	-3.26985	-12.9298
CTNNA1	12.8121	15.9187	-0.201301	-0.085556
CTNNAL1	20.9978	4.64295	2.28277	2.05308
CTNNB1	221.623	290.516	-0.280262	-0.378311
CTNNBIP1	19.7313	3.97967	2.41798	2.1156
CTNNBL1	56.167	66.9911	-0.146821	-0.11219
CTNS	12.0304	26.5311	-1.03892	-0.78591
CTPS1	157.59	42.4498	2.00361	6.42954
CTPS2	4.45526	153.217	-4.95286	-20.7627
CTR9	106.08	73.6239	0.636205	0.989057
CTSA	63.7557	216.229	-1.64941	-4.1819
CTSB	34.1103	145.258	-1.97996	-5.07903
CTSC	200.052	290.516	-0.426789	-0.63252
CTSE	0	272.608	-11.9501	-19.5313
CTSF	17.6335	1.98984	3.25586	2.35947
CTSH	14.062	7.29607	1.04898	0.564471
CTSO	27.4935	43.1131	-0.538999	-0.4587
CTSS	126.807	266.638	-0.96026	-2.05532
CTSV	0.26642	62.3482	-7.97806	-9.34319
CTSW	1353.7	893.436	0.713769	1.57864
CTSZ	12.0246	27.8577	-1.10833	-0.90064
CTU2	21.1852	79.5934	-1.79855	-3.62708
CUEDC1	0.149879	15.9187	-6.89026	-3.74539
CUEDC2	18.6282	26.5311	-0.403386	-0.24719
CUL1	156.832	94.1856	0.844385	1.83805
CUL2	103.928	98.1652	0.19017	0.184812
CUL3	294.711	226.841	0.486078	0.88731
CUL4A	77.3303	25.2046	1.72497	3.58335
CUL4B	66.4189	100.155	-0.4818	-0.578365
CUL5	95.0835	56.3787	0.863232	1.50682
CUL7	10.7201	39.1334	-1.75419	-2.12352
CUL9	24.7686	6.63279	2.01055	2.03609
CUTA	230.697	114.747	1.11504	3.15213
CUTC	33.6021	9.2859	1.96494	2.48763
CUX1	101.095	166.483	-0.608886	-0.965078
CUZD1	18.7923	0.663279	4.93446	2.34614
CWC15	168.059	71.6341	1.34135	3.25573
CWC27	48.7191	25.2046	1.06133	1.39143
CWF19L1	55.8384	19.2351	1.64725	2.91061
CWF19L2	211.341	75.6138	1.59324	5.44886
CX3CR1	25.8409	2.65311	3.39712	3.14887
CXCL10	0	17.9085	-8.02198	-5.06913
CXCL16	11.0744	0	6.61565	2.19757
CXCR3	166.159	61.6849	1.54505	2.90038
CXCR4	3489.83	616.186	2.61381	17.2576
CXCR5	6.47561	29.1843	-2.06589	-2.1312
CXCR6	31.2595	42.4498	-0.325316	-0.173707
CXXC1	57.6143	180.412	-1.54021	-4.1819
CXXC5	11.5975	29.1843	-1.21682	-0.910462
CXorf23	2.42475	25.2046	-3.26019	-3.19891
CXorf38	38.5473	53.0623	-0.3518	-0.300456
CXorf56	29.2538	1.32656	4.57083	3.64122
CXorf57	37.2678	0.663279	5.92154	3.43124
CYB561	27.1192	0	7.9063	3.17388
CYB561A3	46.2507	23.878	1.06302	1.37202
CYB561D1	18.4495	15.9187	0.322315	0.167593
CYB5A	12.1798	144.595	-3.46836	-12.4725
CYB5B	42.6596	76.277	-0.727469	-0.928894
CYB5D2	76.3918	8.62262	3.2572	7.9513
CYB5R1	22.5995	17.9085	0.444518	0.269365
CYB5R3	62.6697	50.4092	0.421341	0.414379
CYB5R4	83.1409	85.5629	0.0677049	0.0535156
CYBA	629.843	204.29	1.73448	9.4939
CYC1	32.1682	69.6443	-1.00981	-1.32663
CYFIP2	329.628	247.403	0.520413	0.955672
CYHR1	27.9273	42.4498	-0.496338	-0.414379
CYLD	189.788	93.5223	1.12946	3.04737
CYP20A1	95.1077	17.2452	2.57302	7.5441
CYP2R1	21.4143	3.97967	2.53522	2.32623
CYP4V2	50.7759	14.5921	1.90944	3.20474
CYP51A1	53.9941	51.7357	0.171714	0.120079
CYSTM1	52.8981	3.97967	3.84122	6.31024
CYTH1	308.908	394.651	-0.245075	-0.354851
CYTH2	62.6202	124.033	-0.879187	-1.48349
CYTH3	22.9665	75.6138	-1.60362	-2.31567
CYTH4	94.3987	356.844	-1.80962	-8.11873
CYTIP	866.98	1369.67	-0.55137	-1.35293
D2HGDH	29.936	27.8577	0.210264	0.124621
DAAM1	33.8209	30.5108	0.258378	0.173255
DAB1	32.8651	0	8.18396	3.42235
DAD1	160.717	707.718	-2.02752	-9.05576
DAG1	35.1015	35.1538	0.106523	0.0643937
DAGLB	115.784	21.2249	2.55628	8.41022
DALRD3	42.3828	26.5311	0.782946	0.819929
DAP3	129.203	127.349	0.129983	0.127203
DAPK2	16.8466	1.98984	3.18595	2.16687
DAPK3	16.9794	0	7.2287	2.6682
DAPL1	0	830.425	-13.5571	-26.0076
DAPP1	17.7402	91.5325	-2.26183	-5.48079
DARS	71.5426	80.2567	-0.0568886	-0.0437551
DARS2	10.3547	13.9289	-0.317607	-0.128644
DAXX	17.961	47.0928	-1.28153	-1.54046
DAZAP1	88.9418	147.248	-0.619187	-1.01239
DAZAP2	926.333	596.951	0.7446	2.09631
DBF4	209.374	113.421	0.994454	2.58101
DBI	122.864	103.471	0.357514	0.455447
DBN1	42.555	0	8.55563	3.73847
DBNDD2	15.5921	3.31639	2.34095	1.70649
DBNL	77.9615	246.076	-1.54898	-4.37277
DBP	22.0101	23.878	-0.00601308	-0.00276162
DBR1	42.4666	45.1029	0.0201335	0.0121137
DBT	12.0902	27.8577	-1.0912	-0.878805
DCAF1	61.9096	85.5629	-0.358799	-0.378311
DCAF10	34.4908	40.46	-0.119264	-0.0728098
DCAF11	53.1631	74.2872	-0.372424	-0.374586
DCAF12	24.4709	151.891	-2.52368	-8.53758
DCAF13	60.6793	98.1652	-0.585566	-0.759243
DCAF15	46.4068	34.4905	0.534756	0.483597
DCAF17	22.5113	46.4295	-0.933554	-1.02732
DCAF5	110.318	64.338	0.886812	1.70036
DCAF6	45.013	66.3279	-0.449339	-0.449865
DCAF7	34.0751	198.32	-2.42793	-8.97225
DCAKD	31.7888	25.8679	0.404638	0.284527
DCK	45.5791	100.155	-1.0263	-1.44979
DCLRE1B	23.2493	45.7662	-0.868502	-0.91251
DCLRE1C	22.0295	54.3888	-1.19691	-1.59892
DCP1B	8.96066	29.1843	-1.58853	-1.43675
DCP2	95.8909	59.0318	0.808813	1.37537
DCPS	30.4925	60.3584	-0.878648	-1.05847
DCTD	43.6977	11.939	1.97967	3.10165
DCTN1	82.1436	41.7866	1.08511	1.92297
DCTN2	78.1794	161.177	-0.936429	-1.85022
DCTN3	85.3439	108.114	-0.232313	-0.232726
DCTN4	140.634	122.043	0.314479	0.375804
DCTN5	34.5475	153.881	-2.04481	-6.39003
DCTN6	91.4093	105.461	-0.0974445	-0.0831357
DCTPP1	10.943	12.6023	-0.0984504	-0.0362222
DCUN1D1	49.6404	21.2249	1.33447	2.0173
DCUN1D2	11.4909	26.5311	-1.09241	-0.848611
DCUN1D3	11.2097	7.29607	0.721214	0.314776
DCUN1D4	31.9989	12.6023	1.45296	1.6328
DCUN1D5	64.9212	330.976	-2.24104	-11.4966
DCXR	54.9511	0.663279	6.47962	4.11007
DDA1	123.613	291.843	-1.13062	-3.40244
DDB1	120.184	202.3	-0.642008	-1.23412
DDB2	37.1162	137.299	-1.77623	-4.85793
DDHD1	121.269	55.0521	1.24881	2.89843
DDHD2	72.3025	27.1944	1.51892	3.01721
DDIT3	500.931	72.2974	2.9062	16.6158
DDIT4	160.407	5.96951	4.85736	14.6928
DDOST	145.968	94.8488	0.730484	1.40582
DDRGK1	61.993	149.238	-1.15737	-2.58076
DDX1	54.4094	30.5108	0.943477	1.22358
DDX10	33.6697	131.329	-1.85207	-5.09815
DDX11	8.23816	23.2148	-1.37666	-0.677904
DDX17	334.398	130.666	1.46212	5.31562
DDX18	153.765	107.451	0.626648	0.924526
DDX19A	72.345	89.5426	-0.19787	-0.181897
DDX20	69.3047	17.9085	2.06383	4.06181
DDX21	355.961	797.924	-1.05302	-2.46993
DDX23	63.7697	134.646	-0.971236	-1.77973
DDX24	687.821	196.994	1.91368	11.1006
DDX27	140.575	226.178	-0.576709	-1.08597
DDX31	79.6846	41.7866	1.03985	1.73525
DDX39A	287.686	118.727	1.38935	4.1972
DDX39B	444.148	516.031	-0.10747	-0.126695
DDX3Y	1024.94	0	13.1479	8.65911
DDX41	45.4629	83.5731	-0.76882	-1.063
DDX42	74.0403	133.319	-0.736989	-1.11337
DDX46	140.865	314.394	-1.04882	-2.83224
DDX47	158.787	114.747	0.577811	0.894653
DDX49	43.4544	50.4092	-0.106631	-0.0705726
DDX5	4576.82	5922.41	-0.261179	-0.453279
DDX50	94.9253	86.8895	0.237095	0.241681
DDX51	52.2421	39.7967	0.502113	0.507965
DDX54	89.6585	92.1957	0.0691395	0.0568395
DDX55	42.6375	34.4905	0.414465	0.357465
DDX56	62.4718	53.0623	0.344602	0.322797
DDX58	36.5164	95.5121	-1.27546	-2.37787
DDX59	32.8818	6.63279	2.41825	3.1559
DDX6	535.923	236.79	1.28788	5.11709
DDX60	34.3762	42.4498	-0.191771	-0.116075
DEAF1	32.1077	45.7662	-0.404236	-0.272887
DECR1	71.2079	8.62262	3.1558	7.34693
DEDD	40.9783	31.8374	0.471779	0.406393
DEDD2	164.494	181.738	-0.0342651	-0.0317554
DEF6	246.756	216.229	0.298679	0.425347
DEF8	12.5245	15.9187	-0.238356	-0.101547
DEK	166.543	95.5121	0.909808	1.91222
DENND1A	32.8156	55.0521	-0.63731	-0.671781
DENND1B	64.7918	88.8793	-0.346505	-0.343231
DENND1C	170.655	171.789	0.0982	0.0927458
DENND2D	105.823	295.159	-1.36803	-3.63669
DENND3	124.706	17.2452	2.96634	7.9985
DENND4A	251.4	398.63	-0.557687	-0.974665
DENND4B	100.619	96.1754	0.173558	0.16408
DENND4C	68.6146	53.7256	0.461782	0.490444
DENND5A	40.2593	14.5921	1.57427	1.97193
DENND6A	162.103	60.3584	1.53294	4.52263
DENND6B	0.527097	30.5108	-5.67156	-5.85972
DENR	98.9831	104.135	0.0354022	0.0287697
DEPDC1B	1.05952	12.6023	-3.39015	-1.63061
DEPDC5	27.4612	31.1741	-0.0771636	-0.0405155
DERA	17.989	37.1436	-0.934452	-0.889391
DERL1	192.292	287.2	-0.467996	-0.770095
DERL2	54.5731	27.1944	1.11373	1.64814
DESI1	81.2728	79.5934	0.139242	0.120636
DESI2	38.1832	39.1334	0.0721235	0.0437241
DET1	4.87176	11.939	-1.17949	-0.558549
DEXI	8.48868	30.5108	-1.72226	-1.48749
DFFA	18.7932	26.5311	-0.389061	-0.229456
DFFB	11.0534	28.521	-1.25858	-1.11792
DGAT1	42.8935	122.043	-1.40148	-3.20661
DGAT2	0.327353	11.2757	-4.98174	-2.33952
DGCR14	58.5631	33.1639	0.928604	1.29897
DGCR8	22.4117	37.8069	-0.647783	-0.53224
DGKA	226.216	322.353	-0.406949	-0.466393
DGKD	94.753	98.1652	0.0561533	0.0433867
DGKE	30.5361	40.46	-0.299246	-0.213354
DGKQ	54.8118	27.8577	1.08595	1.58739
DGKZ	121.14	303.782	-1.21773	-3.88942
DGUOK	106.514	91.5325	0.328965	0.360483
DHCR24	3.14634	25.2046	-2.91219	-2.66857
DHCR7	18.1566	63.0115	-1.68676	-2.65482
DHDDS	20.0034	29.1843	-0.434705	-0.288317
DHODH	5.13265	13.2656	-1.25602	-0.639257
DHPS	85.0664	76.277	0.264423	0.246396
DHRS1	21.2175	45.1029	-0.978516	-0.985079
DHRS13	12.823	5.30623	1.38367	0.817671
DHRS3	57.0525	3.31639	4.20999	6.09142
DHRS7B	13.9007	17.2452	-0.201614	-0.0856674
DHX15	183.782	347.558	-0.809504	-2.03783
DHX16	39.5785	136.635	-1.67486	-4.15957
DHX29	54.3354	21.2249	1.46435	2.41166
DHX30	72.6011	71.6341	0.126759	0.100036
DHX32	7.45766	14.5921	-0.861795	-0.440259
DHX33	9.03917	64.338	-2.72237	-5.48946
DHX34	10.0095	11.2757	-0.0581481	-0.0201923
DHX35	36.8766	14.5921	1.44727	1.82794
DHX36	181.816	51.7357	1.92281	7.41646
DHX37	72.1359	29.1843	1.41501	2.7592
DHX38	109.473	76.277	0.631124	0.916447
DHX40	137.276	79.5934	0.895266	1.87975
DHX57	30.7024	20.5616	0.687524	0.578594
DHX58	17.1795	17.9085	0.0477649	0.0211535
DHX8	126.924	113.421	0.271899	0.302022
DHX9	333.189	414.549	-0.206438	-0.272887
DIABLO	93.2326	40.46	1.31388	2.86571
DIAPH1	206.473	233.474	-0.0674373	-0.0657194
DIAPH2	50.5634	66.9911	-0.295717	-0.248209
DIAPH3	0.388494	14.5921	-5.25773	-2.94641
DICER1	69.0959	38.4702	0.953121	1.37535
DIDO1	97.0703	187.045	-0.838161	-1.7556
DIEXF	27.6882	52.399	-0.809836	-0.906244
DIMT1	28.0598	37.1436	-0.29362	-0.201211
DIP2A	160.815	4.64295	5.2278	13.3557
DIP2B	70.1663	270.618	-1.84805	-1.21485
DIRC2	16.7187	53.0623	-1.55943	-2.2449
DIS3	143.572	50.4092	1.62005	4.85071
DIS3L	34.8968	17.2452	1.12515	1.25215
DIS3L2	73.1721	43.1131	0.87136	1.32843
DISC1	16.0237	11.939	0.535304	0.272131
DKC1	64.8983	74.2872	-0.0862475	-0.0657194
DKK3	17.2999	0	7.25895	2.67228
DLAT	26.1416	27.1944	0.0475603	0.0233731
DLD	69.5829	75.6138	-0.00869687	-0.00580066
DLEC1	17.0519	0	7.23589	2.67477
DLG1	53.3963	60.3584	-0.0696241	-0.0474274
DLG2	10.9194	0.663279	4.14957	1.6328
DLG3	21.8904	8.62262	1.45173	1.27701
DLG4	13.5204	34.4905	-1.23859	-0.970674
DLGAP4	52.4942	47.0928	0.263228	0.199881
DLST	98.905	135.309	-0.341138	-0.391253
DMAP1	31.5012	8.62262	1.97591	2.38955
DMGDH	19.549	0	7.42994	2.8126
DMRTA1	0	17.9085	-8.02198	-5.06913
DMTN	25.3685	0	7.81047	3.11482
DMWD	28.4215	0	7.97069	3.23836
[truncated: 6,717 more rows]

## Sheet: TableS2e
Differential gene expression analysis, mouse vs human, Cardiac Myocytes
gene	tpm, human, Cardiac Myocytes	tpm, mouse, Cardiac Myocytes	log2(foldchange)	-log10(pvalue)*sign
A1BG	13.4263	0	7.31792	5.56363
A2M	32.6451	3.03827	3.49495	2.02859
A4GALT	23.9041	26.2529	-0.0111336	-0.00367204
AAAS	53.8982	55.5023	0.146711	0.0835199
AACS	25.8456	71.686	-1.36002	-1.59945
AADAC	68.886	0	9.65868	2.13424
AAED1	17.8457	68.9956	-1.73753	-4.01637
AAGAB	47.9346	20.9256	1.416	1.43508
AAK1	17.6581	47.6927	-1.42996	-1.06823
AAMDC	67.4666	30.6679	1.26991	1.72695
AAMP	98.4873	198.978	-0.870531	-1.35385
AAR2	19.846	27.0083	-0.176735	-0.086329
AARS	101.712	224.014	-0.963351	-1.14937
AARS2	18.4814	7.7238	1.42402	1.47687
AARSD1	36.4969	44.1077	-0.119897	-0.0671268
AASDH	16.6864	7.39203	1.36153	0.985411
AASDHPPT	87.1592	54.5428	0.854359	1.22011
AASS	25.7449	0.871264	4.7999	5.96249
ABAT	21.4971	31.0895	-0.390896	-0.166723
ABCA1	92.8915	63.6911	0.724463	0.45199
ABCA2	15.5612	6.1139	1.46077	0.834459
ABCA3	2.35002	51.8055	-3.76662	-3.50077
ABCA5	21.1933	25.6285	-0.227253	-0.0617084
ABCA6	139.228	13.3412	3.57848	2.8169
ABCA7	4.25753	25.5453	-2.733	-3.57082
ABCA8	69.9604	42.1414	0.888242	0.402409
ABCA9	32.2599	23.8717	0.541837	0.203363
ABCB10	15.255	11.3278	0.652538	0.376369
ABCB6	19.3129	9.24544	1.27055	1.23635
ABCB7	21.2815	28.6785	-0.232397	-0.128101
ABCB8	25.7423	10.1555	1.50574	1.52754
ABCB9	18.8745	4.49957	2.12186	2.37386
ABCC1	43.0558	129.445	-1.50134	-1.54012
ABCC10	16.1809	9.45655	0.848687	0.522245
ABCC4	25.6244	8.94469	1.59151	1.87185
ABCC5	10.5865	50.3008	-2.26281	-2.76526
ABCD1	21.503	21.2345	0.059772	0.0230543
ABCD3	39.0386	55.3092	-0.322501	-0.284415
ABCD4	26.2773	18.0016	0.73347	0.488064
ABCE1	46.9614	158.304	-1.55069	-1.19209
ABCF1	102.614	101.719	0.139234	0.08308
ABCF2	62.9211	48.8055	0.49037	0.475892
ABCF3	49.4571	44.3844	0.294181	0.235023
ABCG1	6.30511	16.5785	-1.11764	-0.453511
ABHD10	27.6977	9.39203	1.74044	2.40336
ABHD11	21.5919	54.4729	-1.31281	-1.21213
ABHD12	35.1837	56.6046	-0.45763	-0.363922
ABHD13	23.7166	35.1937	-0.388796	-0.302975
ABHD14A	27.3578	25.2426	0.352842	0.214924
ABHD14B	116.71	55.7541	1.20065	2.02678
ABHD16A	19.4076	46.2104	-1.15956	-1.60362
ABHD17A	17.7846	111.883	-2.4898	-7.11481
ABHD17B	15.3714	50.2138	-1.47355	-2.65111
ABHD17C	43.4714	127.622	-1.35147	-1.3587
ABHD18	15.3279	0.267242	6.40707	4.44753
ABHD2	45.8951	189.095	-1.93041	-4.67794
ABHD3	10.0868	0	6.80894	4.3357
ABHD4	46.4815	123.603	-1.25293	-2.15516
ABHD5	48.6977	73.7778	-0.452553	-0.235554
ABHD8	9.23582	35.6464	-1.67442	-2.54218
ABI1	66.4932	131.964	-0.844493	-1.17798
ABI2	92.243	42.1214	1.3095	2.28174
ABI3BP	11.4478	3.46298	1.79638	0.667155
ABL1	27.1291	46.3099	-0.640776	-0.698742
ABL2	18.774	13.4088	0.512142	0.292623
ABLIM1	19.6328	64.6649	-1.42542	-1.22375
ABLIM3	35.386	15.0773	1.34992	0.596931
ABR	39.8878	19.6735	1.14103	1.35687
ABRACL	125.416	251.843	-0.84798	-0.992324
ABT1	22.1603	32.399	-0.311434	-0.196143
ABTB1	23.0827	14.557	0.772582	0.41051
ABTB2	9.206	12.1608	-0.180214	-0.0610814
AC013461.1	37.2451	50.4033	-0.235849	-0.147324
AC025263.3	0	51.9851	-8.20553	-9.45057
AC068533.7	0.138237	20.6601	-5.61432	-5.84173
ACAA2	93.3269	183.253	-0.808837	-0.655946
ACAD11	13.2821	27.49	-0.919693	-0.934043
ACAD8	29.7868	21.9569	0.525327	0.385089
ACAD9	45.6143	19.9159	1.35299	2.48945
ACADL	0.207355	66.8989	-6.87992	-11.1702
ACADM	41.0587	48.8672	-0.0485898	-0.0280534
ACADS	20.9737	37.8131	-0.832191	-0.551828
ACADSB	14.4553	136.559	-3.31371	-7.82157
ACADVL	259.597	75.4342	1.94944	3.29572
ACAP2	74.5822	83.5046	-0.0446383	-0.0222902
ACAP3	5.61419	26.1764	-2.42562	-2.77452
ACAT1	111.788	126.011	-0.0160655	-0.0117895
ACBD3	115.57	84.028	0.606648	0.804951
ACBD4	6.00116	43.5019	-2.57438	-4.46049
ACBD5	18.7088	20.3281	-0.0900888	-0.0386242
ACBD6	0	60.4145	-8.4185	-10.6059
ACCS	11.6392	10.3873	0.141115	0.0423845
ACD	15.312	44.5576	-1.23359	-1.0129
ACE	27.3916	285.456	-3.30201	-15.3098
ACER2	3.50317	23.0787	-2.1954	-2.12967
ACER3	16.2401	23.7232	-0.310146	-0.182466
ACIN1	175.381	114.561	0.779861	0.475892
ACKR1	17.3328	1.33844	3.91863	0.611161
ACKR3	12.7848	40.9693	-1.37717	-0.600413
ACLY	137.89	68.8474	1.16786	1.07642
ACO1	94.257	54.2822	0.959588	1.64587
ACO2	70.073	47.7326	0.739041	0.606706
ACOT11	2.61645	11.2387	-1.76294	-0.808564
ACOT13	59.2817	100.682	-0.562427	-0.4972
ACOT7	54.5216	157.201	-1.37053	-0.766846
ACOT8	36.7932	17.0215	1.32968	2.01973
ACOX1	61.93	139.404	-1.07082	-1.30217
ACOX2	26.4178	0.848085	5.06401	6.59191
ACOX3	21.7893	26.9181	-0.161619	-0.0696363
ACP1	108.022	3.561	5.09948	13.1238
ACP2	85.5505	106.816	-0.184052	-0.103591
ACP5	0.426524	22.7265	-5.48768	-4.23028
ACP6	28.0575	15.2303	1.02088	0.299314
ACSF2	26.5935	20.2549	0.529934	0.331028
ACSF3	8.97116	11.5629	-0.138264	-0.04726
ACSL1	60.4942	29.6441	1.15545	1.08939
ACSL3	220.388	46.5623	2.39933	6.87744
ACSL4	156.406	81.1962	1.0858	1.05092
ACSL5	16.4676	11.017	0.61297	0.169313
ACSM5	15.3461	0	7.49169	0.900064
ACSS1	36.5071	2.96507	3.81973	3.75638
ACSS2	50.1549	14.1544	1.91845	2.57797
ACSS3	27.9189	1.9715	4.06384	6.01777
ACTA2	818.226	3928.12	-2.09688	-1.6939
ACTB	10343.6	18535.6	-0.69801	-0.633739
ACTC1	0	614.806	-11.5534	-4.48716
ACTG1	13024.5	26.6994	9.10064	135.286
ACTG2	4.53609	35.3073	-2.5781	-1.87685
ACTL6A	72.5872	36.2481	1.20068	1.9035
ACTN1	641.882	755.408	-0.0738778	-0.0320562
ACTN2	2.47436	60.0325	-4.49681	-2.878
ACTN4	249.595	508.833	-0.860915	-0.934271
ACTR10	95.1514	92.4242	0.210865	0.17168
ACTR1A	200.96	155.967	0.528897	0.354716
ACTR1B	26.7794	119.255	-1.99753	-5.02189
ACTR2	105.722	98.5215	0.294313	0.164024
ACTR3	344.705	480.075	-0.316971	-0.257579
ACTR3B	13.2032	2.23875	2.70703	1.82241
ACTR6	15.4248	7.41019	1.27956	1.10839
ACTR8	34.4871	36.8577	0.0158105	0.00838929
ACVR1	49.6536	30.3004	0.817192	0.473345
ACVR1B	39.8006	26.3467	0.711708	0.583387
ACVR2A	23.6575	9.19963	1.44115	1.62567
ACVRL1	65.4316	63.0573	0.203435	0.0872921
ACY3	0	15.4967	-6.42947	-5.29865
ACYP1	6.94695	38.8452	-2.29465	-3.14296
ACYP2	37.2633	85.5491	-1.12209	-1.8002
ADA	17.433	28.316	-0.675348	-0.536577
ADAL	5.42458	16.6852	-1.29811	-1.03877
ADAM10	143.941	94.7419	0.787458	1.1535
ADAM12	5.17585	157.496	-5.01383	-6.80017
ADAM15	97.3159	225.012	-1.02897	-1.17798
ADAM17	35.2844	74.8386	-0.877607	-0.878347
ADAM19	64.7674	92.747	-0.377303	-0.131446
ADAM23	5.47008	24.8856	-1.85939	-1.07101
ADAM33	15.7703	4.20801	2.08038	1.01029
ADAM8	0	51.5281	-8.14388	-8.29531
ADAM9	273.784	292.794	0.0577906	0.0245589
ADAMTS1	445.146	720.376	-0.515692	-0.261293
ADAMTS10	5.65171	78.5964	-3.65575	-9.60226
ADAMTS12	43.1841	123.644	-1.29875	-0.83551
ADAMTS14	0.78393	26.2183	-5.20199	-5.58608
ADAMTS15	52.3361	35.5088	0.727734	0.165525
ADAMTS2	111.436	379.864	-1.60029	-3.32517
ADAMTS3	11.1554	5.34121	1.12654	0.444683
ADAMTS5	2.27496	954.488	-9.54633	-24.554
ADAMTS7	18.5327	23.2216	-0.235963	-0.103189
ADAMTS9	30.8664	52.3707	-0.651692	-0.280583
ADAMTSL1	21.6212	4.44845	2.44615	2.68337
ADAMTSL2	8.51892	271.469	-4.89124	-7.54085
ADAMTSL4	26.3325	41.5237	-0.434542	-0.16503
ADAMTSL5	2.1663	43.4447	-3.64195	-5.80323
ADAP2	0.564761	22.1923	-4.80408	-4.23028
ADAR	66.5107	38.9848	0.9505	1.44567
ADARB1	26.3889	40.0959	-0.363978	-0.150549
ADAT2	7.93053	16.6104	-1.01767	-0.736417
ADAT3	91.3826	89.2883	0.212562	0.144715
ADCK1	6.50476	13.1443	-0.867599	-0.534665
ADCK4	18.7244	15.2521	0.345956	0.175454
ADCK5	9.22988	15.5959	-0.754363	-0.41996
ADCY3	48.3108	31.4073	0.738767	0.359255
ADCY6	22.0739	0.695056	5.09643	5.59601
ADCY7	8.2525	17.5619	-0.960319	-0.416406
ADCY9	12.5082	2.7361	2.1577	1.24459
ADCYAP1R1	0	11.3337	-5.96651	-3.97565
ADD1	150.77	190.723	-0.179482	-0.140556
ADD3	528.271	102.671	2.52346	5.87536
ADGRA2	59.4695	145.858	-1.1251	-2.43326
ADGRA3	14.8281	12.9109	0.293212	0.134734
ADGRD1	10.8001	41.7129	-1.67608	-0.583387
ADGRE1	0	10.8394	-5.86432	-3.5727
ADGRE5	17.9564	257.621	-3.86575	-9.91671
ADGRL1	7.10111	28.5241	-2.06548	-2.48333
ADGRL2	7.17023	38.503	-2.43863	-3.00196
ADGRL4	28.7169	5.70286	2.42057	2.56858
ADH5	132.243	117.137	0.352996	0.372301
ADHFE1	9.38815	19.4453	-1.10356	-0.382691
ADI1	189.242	22.5713	3.2136	10.5836
ADIPOR1	60.1313	203.235	-1.54409	-1.92027
ADIPOR2	42.3387	38.6846	0.231095	0.126457
ADK	35.8256	52.0353	-0.317384	-0.250976
ADM	338.493	1627.51	-2.10319	-2.07239
ADNP	59.7453	75.902	-0.218186	-0.153158
ADNP2	10.3201	14.6615	-0.458914	-0.245229
ADO	30.5292	56.2166	-0.697256	-0.682088
ADORA2B	64.8859	45.6628	0.688578	0.430126
ADPGK	30.7109	60.1071	-0.725283	-0.639027
ADPRH	4.11134	82.643	-4.26857	-10.6617
ADPRHL2	17.0202	26.7734	-0.360063	-0.130915
ADPRM	10.324	17.4554	-0.647232	-0.388941
ADRA1B	15.2904	7.22476	1.32673	0.67012
ADSL	49.5326	39.9111	0.526415	0.285201
ADSS	63.7481	86.4583	-0.240484	-0.167198
AEBP1	181.868	417.895	-1.01109	-0.685135
AEBP2	48.9108	52.4698	0.00080887	0.000324313
AEN	8.45189	62.8194	-2.6354	-4.42505
AES	278.704	461.556	-0.577926	-0.989892
AFAP1	80.7204	138.779	-0.58586	-0.471996
AFAP1L1	55.2325	11.9701	2.35234	1.89173
AFAP1L2	6.54406	51.6704	-2.85491	-3.31364
AFF1	75.5857	92.7221	-0.170058	-0.069637
AFF2	0.426524	25.4877	-5.73096	-5.65317
AFF3	0.0691183	11.7956	-5.32385	-4.16267
AFF4	74.546	137.895	-0.733694	-1.21836
AFG3L2	59.6752	38.2646	0.785729	0.83987
AFMID	49.4909	2.68974	4.44828	9.43303
AFTPH	4.72955	10.4362	-1.03749	-0.624544
AGA	23.5784	113.757	-1.98495	-3.32288
AGAP3	34.4534	58.4282	-0.671615	-0.744367
AGBL5	29.6073	4.27979	2.97885	5.3943
AGFG1	115.602	82.2737	0.664445	0.526015
AGFG2	30.9544	56.6886	-0.808799	-0.584552
AGGF1	27.6561	35.4933	-0.103488	-0.04726
AGO1	30.5456	32.6846	-0.0101273	-0.00465976
AGO2	9.86199	28.2448	-1.34367	-1.39944
AGO3	13.9278	17.3233	-0.178158	-0.082375
AGPAT1	57.9718	96.9624	-0.623272	-0.512224
AGPAT2	22.0162	33.6668	-0.34017	-0.175546
AGPAT3	12.9721	139.45	-3.05261	-7.04801
AGPAT4	8.91386	80.448	-2.99575	-6.80544
AGPAT5	86.2798	53.2578	0.841342	0.59759
AGPS	105.304	65.4874	0.814941	0.944972
AGRN	28.1225	46.6233	-0.490634	-0.235389
AGT	1.48307	14.767	-3.39847	-2.67351
AGTPBP1	11.7418	22.958	-0.852586	-0.786593
AGTRAP	88.5786	57.1668	0.793356	0.55904
AHCTF1	30.0934	30.9022	0.0225955	0.00926369
AHCYL1	127.19	229.576	-0.709944	-1.19239
AHCYL2	11.8386	9.50569	0.322009	0.135887
AHDC1	30.1588	41.7429	-0.380816	-0.120459
AHI1	26.2009	14.9665	0.862564	0.422679
AHNAK	451.96	2563.38	-2.32202	-3.38965
AHNAK2	18.2015	5.96787	1.66149	1.09105
AHSA1	134.183	96.6956	0.6143	0.732835
AHSA2	26.1597	48.8714	-0.827679	-0.305846
AHSG	0	40.3081	-7.77115	-6.74155
AIFM1	36.4692	18.2591	1.19007	1.69916
AIFM2	29.311	19.2359	0.771484	0.835766
AIG1	46.6219	26.7913	1.02179	0.844048
AIM2	0	56.6559	-8.32702	-9.3301
AIMP1	100.833	120.53	-0.0809346	-0.0541971
AIMP2	56.7362	73.9074	-0.176449	-0.0918718
AIP	41.6155	54.9029	-0.190272	-0.137825
AJUBA	18.1243	13.129	0.713554	0.400197
AK1	65.9435	342.834	-2.24286	-4.4148
AK2	49.8464	70.7348	-0.34231	-0.341893
AK3	125.981	199.933	-0.513213	-0.540221
AK4	50.78	7.04049	3.0123	2.0552
AKAP1	12.9643	18.0996	-0.458168	-0.217863
AKAP10	35.7903	42.5729	-0.151317	-0.0955834
AKAP11	11.011	22.8304	-0.789663	-0.550641
AKAP12	170.343	274.299	-0.558018	-0.23138
AKAP13	41.4813	62.9648	-0.501706	-0.309256
AKAP2	141.538	667.04	-2.0722	-4.39558
AKAP7	13.701	27.0979	-0.913508	-0.674062
AKAP8	23.5763	37.6383	-0.555073	-0.470916
AKAP8L	49.3425	48.2791	0.171312	0.111608
AKAP9	31.4263	25.6495	0.356519	0.139658
AKIP1	34.5045	33.612	0.128574	0.0703109
AKIRIN1	60.8735	26.8525	1.39521	1.90563
AKIRIN2	89.576	92.3921	0.0779511	0.0398857
AKR1A1	92.739	546.131	-2.37297	-7.72326
AKR1B1	132.968	19.0011	2.9916	14.0242
AKR1E2	4.03836	21.9977	-2.5376	-2.87661
AKR7A2	148.385	57.2774	1.53688	1.91651
AKT1	68.6443	224.906	-1.59016	-3.96905
AKT1S1	61.6963	112.737	-0.691038	-1.02623
AKT2	64.9665	95.5062	-0.352759	-0.279003
AKT3	16.3827	16.6805	0.0813876	0.0303509
AKTIP	7.76665	44.4779	-2.0751	-2.23496
ALAD	71.8263	67.7507	0.223812	0.0739132
ALAS1	54.2086	71.5075	-0.195833	-0.151168
ALAS2	0	12.5992	-5.87592	-0.61704
ALCAM	31.3436	74.707	-1.03474	-0.609399
ALDH16A1	31.6738	18.5632	0.948326	0.518923
ALDH18A1	59.0628	40.6031	0.714817	0.601129
ALDH1A2	24.6426	39.8631	-0.516888	-0.2392
ALDH1A3	104.131	0.871264	6.93907	8.26692
ALDH1B1	53.8799	10.3487	2.57632	1.69792
ALDH1L1	32.3017	6.78746	2.41643	0.896599
ALDH1L2	73.0493	49.9234	0.72425	0.320429
ALDH3A2	32.0698	59.0788	-0.730468	-0.97598
ALDH3B1	32.7414	25.6768	0.420441	0.259439
ALDH4A1	20.7009	19.4568	0.316076	0.163729
ALDH6A1	37.9918	56.6917	-0.412494	-0.270007
ALDH7A1	77.3743	73.9799	0.237322	0.225104
ALDH9A1	110.366	41.9033	1.53034	3.54604
ALDOC	55.1752	3.97959	4.04956	3.5002
ALG11	24.2896	20.2839	0.365632	0.223738
ALG12	25.3692	17.1675	0.768325	0.704855
ALG14	31.4254	117.122	-1.70779	-2.74843
ALG2	50.03	38.1686	0.607553	0.538539
ALG3	107.144	44.3037	1.44126	2.41455
ALG5	41.0527	59.7373	-0.4468	-0.346798
ALG6	11.5187	10.1039	0.271791	0.102553
ALG8	45.5979	18.4046	1.48271	1.01782
ALKBH1	5.90841	23.5152	-1.63886	-1.78579
ALKBH2	14.8122	8.31918	0.975168	0.591723
ALKBH4	13.8132	7.26694	1.00846	0.738305
ALKBH5	92.6196	76.5887	0.463999	0.462323
ALKBH6	9.22401	16.1804	-0.542348	-0.310215
ALKBH7	135.587	42.7075	1.81616	3.72933
ALKBH8	3.60388	16.6805	-2.01785	-1.90765
ALMS1	10.3892	2.97207	1.85371	1.42023
ALOX5AP	1.77136	20.3978	-3.6977	-3.57517
ALPK1	13.8903	10.1753	0.532898	0.2761
ALPK2	10.0537	1.33621	3.10802	0.307317
ALPL	47.2446	2.4898	4.41709	2.6363
ALS2	18.2072	11.3387	0.816125	0.66693
AMACR	9.84013	11.0025	-0.0821778	-0.0303509
AMBRA1	44.8778	44.4938	0.112299	0.049768
AMFR	38.6103	79.2916	-0.850555	-1.03879
AMHR2	10.28	0.137393	5.89407	2.42547
AMIGO2	49.9297	7.44732	2.9232	2.76315
AMIGO3	27.8749	1.41384	4.62593	5.67053
AMMECR1	39.4907	58.2093	-0.332744	-0.17168
AMMECR1L	0.0691183	59.1205	-7.66822	-10.6306
AMN1	21.8268	33.1141	-0.427453	-0.31444
AMOT	3.05093	36.5841	-3.62151	-5.16039
AMOTL1	31.3884	128.448	-1.8282	-4.53966
AMOTL2	102.704	745.857	-2.68	-5.50427
AMPD2	32.8299	31.7492	0.239654	0.159622
AMPD3	6.30126	239.237	-5.04407	-18.2551
AMZ2	54.5604	69.8513	-0.164245	-0.10151
ANAPC1	19.6286	69.959	-1.58205	-2.76012
ANAPC10	39.6075	29.9323	0.559133	0.587025
ANAPC11	149.918	228.162	-0.437164	-0.40993
ANAPC13	70.8867	34.0041	1.24539	1.95855
ANAPC15	19.5595	15.3303	0.573768	0.336489
ANAPC16	111.045	103.749	0.280416	0.170292
ANAPC2	21.947	60.0431	-1.30449	-2.16818
ANAPC4	15.1799	88.7356	-2.42739	-7.19248
ANAPC5	79.5378	165.482	-0.868228	-0.707367
ANAPC7	34.2618	39.0973	-0.0810508	-0.039441
ANG	88.726	277.126	-1.50781	-2.9804
ANGEL1	14.121	1.34599	3.46264	2.62942
ANGEL2	23.3946	22.4867	0.225882	0.138298
ANGPT1	28.7883	16.2669	0.976699	0.250662
ANGPT2	113.508	23.4791	2.47502	1.57211
ANGPT4	0.0691183	11.3373	-5.23154	-3.26279
ANGPTL1	43.1033	0.274785	7.1425	6.19626
ANGPTL2	56.0417	87.6989	-0.515485	-0.252677
ANGPTL4	52.603	69.2661	-0.249716	-0.110129
ANK2	7.27511	36.6405	-2.05133	-1.11331
ANK3	45.4228	8.12199	2.66667	3.27909
ANKFY1	21.4655	30.3437	-0.364365	-0.246856
ANKH	7.09524	18.2974	-1.00103	-0.710501
ANKIB1	45.5733	66.0059	-0.439777	-0.249246
ANKLE2	24.5005	28.3386	-0.0146209	-0.00781904
ANKMY2	13.4558	17.0662	-0.272189	-0.12259
ANKRA2	14.6958	32.4294	-0.92337	-0.909247
ANKRD1	154.584	283.419	-0.740047	-0.0828183
ANKRD10	46.643	30.836	0.709964	0.468351
ANKRD11	59.8185	98.5886	-0.602892	-0.665304
ANKRD12	29.294	18.2507	0.793358	0.27547
ANKRD13A	44.4992	82.7417	-0.76808	-0.948149
ANKRD13B	10.9244	16.1292	-0.648495	-0.315237
ANKRD13C	28.5767	51.8133	-0.71554	-0.816422
ANKRD13D	10.2548	4.4694	1.37693	0.859664
ANKRD16	5.82748	24.6268	-1.69035	-1.69575
ANKRD17	54.0782	63.0099	-0.119241	-0.0702993
ANKRD24	0	16.387	-6.49042	-5.05381
ANKRD27	16.2702	38.3917	-1.09995	-0.932138
ANKRD28	31.904	14.1974	1.26345	0.667397
ANKRD40	38.5691	97.6461	-1.25714	-1.55369
ANKRD42	20.3241	8.56489	1.31462	0.842702
ANKRD46	12.0398	49.8968	-1.71506	-2.50096
ANKRD52	31.0215	42.5193	-0.350521	-0.2378
ANKRD54	29.7732	12.3247	1.38674	2.00437
ANKS1A	4.94872	10.0424	-0.936254	-0.490754
ANKS3	7.42693	11.3155	-0.451281	-0.221758
ANKZF1	36.0984	13.64	1.58673	2.57404
ANLN	51.9335	60.1455	-0.0402995	-0.0103152
ANO10	39.7133	89.4021	-0.987876	-1.15382
ANO3	0.0691183	25.2342	-6.42229	-6.02398
ANO6	108.212	157.234	-0.387525	-0.213544
ANO8	5.04942	10.9416	-1.33894	-0.694419
ANP32B	412.441	79.5961	2.52573	9.21835
ANP32E	64.6446	38.0173	0.943617	0.766538
ANPEP	112.332	31.7583	2.00153	1.67528
ANTXR1	98.2112	177.203	-0.669538	-0.384505
ANTXR2	49.2201	37.8912	0.597996	0.440429
ANXA1	590.931	3433.96	-2.38868	-7.39505
ANXA11	354.22	72.5446	2.44678	13.4551
ANXA2	271.875	1763.6	-2.55311	-3.83923
ANXA3	71.8109	606.758	-2.90195	-2.84268
ANXA4	77.9748	52.9085	0.756591	0.885039
ANXA5	1206.37	874.592	0.606165	0.277641
ANXA6	521.907	279.915	1.05379	2.48019
ANXA7	52.1528	141.76	-1.23306	-2.46151
AOC3	4.33847	11.2328	-1.39508	-0.540075
AOX1	21.5562	27.3774	-0.252383	-0.122799
AP000275.65	53.8095	30.5618	1.01032	1.58027
AP002884.2	35.8079	139.232	-1.71973	-3.15055
AP1AR	25.2691	13.8668	0.972227	0.864411
AP1B1	103.32	89.0374	0.359023	0.421503
AP1G1	75.7095	92.7048	-0.113412	-0.0847373
AP1G2	16.6607	6.1128	1.55602	1.46577
AP1M1	69.6527	52.8334	0.589745	0.583387
AP1S1	57.8375	80.0015	-0.318095	-0.246294
AP1S2	21.9255	123.092	-2.25927	-5.64534
AP2A1	196.419	106.184	1.05875	2.57132
AP2A2	84.0354	298.136	-1.69303	-5.63369
AP2B1	124.89	121.894	0.205001	0.133029
AP2M1	461.372	47.9834	3.41614	23.7257
AP2S1	315.686	228.684	0.616453	0.531274
AP3B1	63.4323	49.6997	0.528467	0.641055
AP3D1	87.546	137.747	-0.523636	-0.667259
AP3M1	43.8844	87.2562	-0.780879	-0.481084
AP3M2	16.027	14.2429	0.235543	0.0911064
AP3S1	69.8783	54.1381	0.569951	0.483025
AP3S2	47.3225	46.7159	0.231235	0.141846
AP4E1	17.0541	29.0122	-0.610561	-0.438509
AP4M1	25.1146	18.2086	0.540167	0.348305
AP4S1	2.98181	13.7537	-2.26113	-1.9257
AP5M1	36.0827	19.0388	1.00839	1.12297
AP5S1	29.783	19.2177	0.750831	0.516692
AP5Z1	31.8308	23.2945	0.566637	0.351711
APAF1	18.3041	37.8446	-0.987163	-0.97598
APBA1	2.48232	10.0187	-2.4202	-1.32209
APBA3	12.3952	54.6689	-1.94442	-3.12802
APBB1	24.7631	1.00111	4.74726	7.35113
APBB1IP	10.419	94.1397	-3.18039	-1.58564
APBB2	106.884	212.601	-0.838829	-1.0082
APBB3	8.72242	113.621	-3.78557	-12.4978
APC	11.6866	38.7963	-1.46453	-2.11756
APC2	1.06836	12.5644	-4.66045	-2.98683
APCDD1	14.591	29.1761	-0.890713	-0.439398
APEH	72.0853	68.7197	0.248782	0.206096
APEX1	293.142	43.91	2.88582	8.48205
APEX2	30.5824	21.1767	0.747571	0.625197
APH1A	65.6157	66.758	0.147564	0.0830857
API5	126.847	107.354	0.424916	0.416456
APIP	31.9328	48.114	-0.396903	-0.235853
APITD1	11.8561	2.06422	2.67117	1.62457
APLN	50.4521	10.8434	2.36713	1.23564
APLP1	8.08267	19.9885	-1.0287	-0.574204
APLP2	574.256	458.2	0.495284	0.664844
APMAP	94.8403	28.7626	1.90909	4.63523
APOBEC1	0	33.0266	-7.50486	-7.04899
APOBEC2	0	10.9667	-5.817	-2.30542
APOBEC3H	0.0691183	37.5118	-7.01335	-8.62522
APOD	30.6565	4.44845	2.92863	2.16787
APOE	3136.05	1185.69	1.60815	0.646363
APOL6	59.3953	0.534484	7.43367	6.88409
APOOL	11.0367	31.9443	-1.18454	-1.11068
APOPT1	62.8043	77.1561	-0.102708	-0.063467
APP	645.274	655.436	0.139294	0.125539
APPBP2	47.6562	71.0649	-0.408626	-0.317918
APPL1	50.5718	43.2258	0.365366	0.249246
APPL2	29.8998	70.9824	-1.16883	-0.819868
APRT	237.905	210.6	0.333129	0.229208
APTX	24.2968	14.0349	0.986331	0.69469
AQP3	18.2503	0	7.64495	5.06509
AQR	23.4461	17.9343	0.623154	0.47002
ARAF	45.0218	81.5646	-0.635856	-0.572557
ARAP1	110.999	94.2345	0.386326	0.182418
ARAP2	0.357406	11.6646	-5.06558	-3.33166
ARAP3	25.2171	1.00111	4.78129	7.01197
ARCN1	177.367	186.53	0.101155	0.0594962
AREL1	21.019	21.1552	0.225908	0.125165
ARF1	549.214	425.058	0.521917	0.432431
ARF3	152.359	141.034	0.265725	0.193669
ARF4	844.59	979.067	-0.0720124	-0.0290688
ARF5	161.128	183.706	-0.0363902	-0.0248462
ARF6	109.768	138.372	-0.185391	-0.1568
ARFGAP1	55.0672	69.6773	-0.157838	-0.103189
ARFGAP2	23.7125	26.9743	0.0246201	0.011596
ARFGAP3	59.5684	72.691	-0.119734	-0.0688509
ARFGEF1	25.103	57.5228	-1.16459	-1.31489
ARFGEF2	29.5556	55.4176	-0.674792	-0.643823
ARFIP2	60.2132	67.956	-0.0386664	-0.0215743
ARFRP1	31.0803	32.564	0.0650857	0.0329933
ARG1	0	53.6275	-8.20191	-6.9979
ARG2	15.8198	1.88047	3.33349	1.9985
ARGLU1	96.0279	112.716	-0.107165	-0.0643194
ARHGAP1	130.162	164.128	-0.180545	-0.153302
ARHGAP10	33.4543	106.829	-1.4312	-1.47524
ARHGAP11B	1.92141	14.9902	-3.26755	-1.92549
ARHGAP12	15.2925	27.6204	-0.823928	-0.730665
ARHGAP17	32.0916	37.049	-0.139628	-0.0752939
ARHGAP18	79.2343	40.9645	1.06988	0.802622
ARHGAP21	85.3384	60.9236	0.615312	0.413005
ARHGAP24	44.643	30.6519	0.674346	0.63599
ARHGAP26	13.2819	10.8877	0.52468	0.288142
ARHGAP29	56.2809	45.8901	0.46912	0.341616
ARHGAP31	25.3243	141.311	-2.39953	-4.73814
ARHGAP35	4.25753	50.3581	-3.73204	-7.71261
ARHGAP4	106.437	42.6171	1.46806	3.03649
ARHGAP42	13.2228	33.5844	-1.30118	-0.841017
ARHGAP44	7.36962	17.8974	-1.1356	-0.73394
ARHGAP45	1.75159	10.1728	-1.96837	-1.03038
ARHGAP5	12.2811	1.41329	3.26088	2.75117
ARHGAP6	53.3721	44.2803	0.379618	0.170615
ARHGDIA	287.467	577.157	-0.843333	-1.40284
ARHGDIB	246.299	285.885	-0.069332	-0.0262701
ARHGEF1	49.5228	75.8711	-0.531059	-0.374492
ARHGEF10	17.6132	39.7424	-1.11869	-0.582583
ARHGEF10L	4.376	15.1077	-1.53958	-1.28563
ARHGEF11	23.5588	36.1903	-0.591827	-0.371178
ARHGEF12	3.32741	84.2452	-4.59903	-13.342
ARHGEF17	16.4379	32.4037	-0.956106	-0.696924
ARHGEF2	52.0262	108.93	-0.946801	-1.12342
ARHGEF25	56.4483	51.0448	0.290484	0.0958972
ARHGEF26	10.3399	9.6964	0.151759	0.0416428
ARHGEF3	47.0013	8.97816	2.58466	2.8835
ARHGEF40	41.6374	62.7899	-0.503937	-0.234881
ARHGEF5	0.345592	17.7553	-4.46329	-3.50035
ARHGEF6	9.57162	40.4989	-2.12189	-2.69839
ARHGEF7	29.8881	40.5008	-0.325502	-0.171079
ARID1A	57.9001	53.6762	0.23496	0.0818753
ARID1B	31.2642	54.3841	-0.741904	-0.485316
ARID2	8.61375	12.4233	-0.300784	-0.139567
ARID3A	10.3635	6.63165	0.58634	0.251158
ARID4A	10.0061	19.5227	-1.04964	-0.681307
ARID4B	19.6191	31.4389	-0.612599	-0.439783
ARID5A	26.5033	21.9754	0.319049	0.121204
ARID5B	129.236	126.019	0.206641	0.116474
ARIH1	85.4297	128.865	-0.468987	-0.327476
ARIH2	71.0966	31.5009	1.30291	2.88605
ARL1	127.88	178.399	-0.332121	-0.249596
ARL10	8.54078	21.5674	-1.18195	-1.19551
ARL13B	16.1751	16.9218	0.085635	0.0382693
ARL14EP	28.6024	57.9127	-0.839121	-0.990742
ARL15	25.5845	42.8407	-0.67757	-0.444683
ARL16	37.1825	36.337	0.198029	0.124344
ARL2BP	83.0737	93.0882	0.0378757	0.0196854
ARL3	72.8104	37.4794	1.13115	2.37669
ARL4A	26.866	27.9404	0.184082	0.0763816
ARL4C	10.9283	18.8561	-0.83902	-0.520351
ARL4D	100.903	12.6344	3.19924	2.4997
ARL5A	60.5893	58.8904	0.228383	0.163956
ARL5B	23.0332	23.805	0.215289	0.0781547
ARL6	11.7557	24.7243	-0.808515	-0.682889
ARL6IP1	161.768	151.923	0.251609	0.098968
ARL6IP4	249.42	78.3801	1.8331	3.85468
ARL6IP5	155.097	220.93	-0.333901	-0.217863
ARL6IP6	38.4461	36.4179	0.274758	0.209338
ARL8A	68.5676	260.392	-1.77505	-5.12478
ARL8B	76.9298	159.529	-0.855712	-1.60185
ARMC1	29.5855	51.6863	-0.549768	-0.297737
ARMC10	57.6604	9.8796	2.77101	6.47615
ARMC2	13.2842	4.83214	1.50946	0.739393
ARMC5	9.54774	14.2245	-0.393267	-0.187482
ARMC6	22.111	18.9326	0.424167	0.296799
ARMC8	46.213	30.9237	0.762419	0.835017
ARMC9	17.2712	8.86285	1.05569	0.835017
ARMCX1	37.7623	48.5709	-0.196172	-0.110129
ARMCX2	53.8285	96.8261	-0.653658	-0.435596
ARMCX3	77.8305	47.5936	0.846586	1.44301
ARMCX4	7.54356	20.4068	-1.62436	-1.00449
ARMCX5	15.875	37.5366	-1.05213	-1.40132
ARMCX6	51.975	9.51854	2.66865	6.16215
ARMT1	32.9522	19.6439	0.98028	0.644937
ARNT	32.9467	84.2547	-1.25516	-2.39472
ARNTL	12.8022	25.1929	-0.854501	-0.604248
ARPC1A	208.784	112.221	1.05617	1.11419
ARPC1B	370.369	832.182	-1.01337	-1.61238
ARPC2	376.696	386.149	0.112522	0.0410651
ARPC3	541.985	597.6	0.0154424	0.00926369
ARPC4	211.415	276.67	-0.234099	-0.221016
ARPC5L	59.0233	52.4333	0.294973	0.219093
ARPP19	64.8335	122.619	-0.73178	-0.68287
ARRB1	25.4597	34.9962	-0.27399	-0.123282
ARRB2	15.7406	22.3418	-0.315943	-0.170846
ARRDC1	15.3002	19.7467	-0.0673896	-0.0230543
ARRDC2	15.221	11.683	0.510264	0.195335
ARRDC3	134.545	99.912	0.613025	0.396307
ARRDC4	17.4136	17.7402	0.253458	0.0768148
ARSA	39.5222	77.0873	-0.757971	-0.746435
ARSB	18.8468	27.1756	-0.247443	-0.109319
ARSJ	26.2506	10.2912	1.52486	1.68096
ARSK	22.2002	20.4559	0.372743	0.205156
ART4	33.2214	53.9508	-0.529051	-0.257579
ARV1	19.3802	7.92373	1.55894	1.48996
ARVCF	2.32431	33.4363	-3.6242	-5.46264
ASAH1	111.642	355.229	-1.53834	-4.39357
ASAP1	36.9854	238.12	-2.60394	-6.98517
ASAP2	60.6275	10.3973	2.72346	5.40568
ASAP3	25.6302	21.4378	0.344969	0.141846
ASB1	27.3976	18.1842	0.767147	0.784239
ASB13	7.82982	10.4965	-0.181901	-0.0695384
ASB2	0.0691183	13.3272	-5.4488	-2.70982
ASB5	0	226.793	-10.1875	-5.08984
ASB6	15.0494	25.7991	-0.581537	-0.448213
ASB7	8.26431	13.9114	-0.622713	-0.380255
ASB8	23.1102	41.2962	-0.659088	-0.634086
ASCC1	38.9476	31.2012	0.485075	0.470762
ASCC2	46.1376	74.2464	-0.556594	-0.624095
ASCC3	62.7059	35.6444	0.970261	1.61677
ASF1A	38.5702	33.2805	0.414379	0.33181
ASF1B	13.7362	9.18934	0.793883	0.243746
ASH1L	13.999	1.11533	3.74858	3.25055
ASH2L	40.4269	39.3917	0.242639	0.163701
ASIP	0.0691183	146.766	-8.97659	-15.1763
ASNA1	53.7877	56.667	0.143491	0.0809176
ASPHD1	31.0528	0	8.43926	8.69837
ASPM	13.3194	10.8285	0.494759	0.134022
ASPN	3.38086	420.293	-6.88097	-21.9639
ASPSCR1	15.9993	56.7801	-1.75501	-3.65471
ASRGL1	2.77061	13.3135	-2.66801	-1.80437
ASUN	27.6563	27.2362	0.239425	0.138311
ASXL1	98.1828	54.326	0.989693	0.844236
ASXL2	20.6381	23.762	-0.190944	-0.0872921
ATAD1	49.1296	86.6168	-0.612039	-0.736316
ATAD2	26.0861	34.3928	-0.187946	-0.0896658
ATAD2B	6.90172	17.4532	-1.48029	-0.903885
ATAT1	12.0498	22.5582	-0.878237	-0.701251
ATE1	15.6617	64.4461	-2.02987	-3.87958
ATF1	36.3747	41.0392	0.0411941	0.0218181
ATF2	37.6091	64.9275	-0.549473	-0.477114
ATF3	40.8265	34.3494	0.386048	0.114028
ATF4	365.518	412.24	-0.0210865	-0.00710215
ATF5	164.211	787.985	-2.0903	-2.08383
ATF6	35.875	70.5904	-0.732394	-0.500896
ATF6B	21.1214	23.4565	0.00916632	0.00383757
ATF7IP	41.361	27.1301	0.683613	0.524666
ATF7IP2	13.7264	0.290421	5.40558	3.64998
ATG10	12.0416	12.4649	0.177425	0.0563587
ATG101	34.8523	40.7558	-0.018432	-0.00930412
ATG12	101.483	91.0171	0.298562	0.200579
ATG13	56.0133	40.8477	0.637521	0.766353
ATG14	22.206	17.4612	0.419397	0.208877
ATG16L1	14.1964	23.8427	-0.559748	-0.430478
ATG16L2	1.69428	19.4124	-3.11307	-2.75058
ATG2A	17.5985	28.3155	-0.543374	-0.317284
ATG2B	8.0965	34.1001	-2.26265	-2.71086
ATG3	77.1505	83.479	0.075928	0.0451208
ATG4B	29.1553	44.0781	-0.523168	-0.407963
ATG4C	35.3692	15.2683	1.34706	1.65332
ATG4D	14.7216	15.6059	0.196182	0.0819517
ATG7	23.5666	14.5727	0.865024	0.803633
ATG9A	58.3394	48.1121	0.477769	0.429553
ATHL1	32.5422	33.6706	0.0431444	0.0115927
ATIC	85.5564	61.4056	0.647046	0.395552
ATL1	9.52436	14.8168	-0.56828	-0.265772
ATL2	16.7478	24.6478	-0.41356	-0.281647
ATL3	102.412	246.478	-1.07931	-2.41763
ATM	36.7543	13.9483	1.49573	1.1854
ATMIN	20.2076	9.31384	1.36068	1.48228
ATOH8	69.7465	148.881	-0.957011	-0.674062
ATOX1	204.653	215.275	0.0751313	0.047231
ATP10A	2.89703	13.0326	-2.30067	-1.65289
ATP10D	29.6391	35.9638	-0.154877	-0.0556279
ATP11A	14.635	60.1255	-1.73262	-2.01911
ATP11B	40.7238	49.66	-0.0851821	-0.035767
ATP11C	31.4539	6.16725	2.41566	3.4941
ATP13A1	49.7654	40.488	0.411427	0.357428
ATP13A2	25.2943	34.333	-0.189199	-0.0918952
ATP13A3	171.529	113.943	0.745397	0.819868
ATP1A1	266.539	411.463	-0.470239	-0.45199
ATP1A2	0	17.9225	-6.56278	-3.91062
ATP1B1	66.6723	505.033	-2.76829	-3.96608
ATP1B2	0.633879	16.8025	-4.16679	-3.25643
ATP1B3	139.243	92.7564	0.750135	0.617036
ATP23	11.0863	6.86007	0.636962	0.256004
ATP2A2	197.368	335.238	-0.608525	-0.388941
ATP2B1	29.736	61.8705	-0.994386	-0.995431
ATP2B4	173.829	13.5805	3.86516	5.15805
ATP2C1	107.267	63.3703	0.89789	1.0901
ATP5A1	335.044	745.853	-0.989909	-1.68966
ATP5B	751.978	1045.37	-0.330712	-0.189332
ATP5C1	516.149	488.684	0.230518	0.130625
ATP5D	496.509	701.348	-0.342702	-0.46714
ATP5F1	317.117	327.109	0.102122	0.0366533
ATP5G1	36.3525	261.005	-2.69855	-6.07745
ATP5G2	284.248	40.1537	2.98079	12.0887
ATP5G3	283.795	998.309	-1.66642	-3.06742
ATP5I	178.96	95.0167	1.06949	1.55861
ATP5J	374.514	470.686	-0.169737	-0.0938095
ATP5J2	323.28	183.325	0.974484	1.39644
ATP5SL	35.3116	13.0988	1.61098	1.47403
ATP6AP1	153.31	273.924	-0.658143	-1.07523
ATP6AP2	204.65	141.397	0.698687	0.933555
ATP6V0A1	28.3732	92.148	-1.54314	-3.9476
ATP6V0A2	13.4225	32.0186	-1.0107	-0.893248
ATP6V0B	58.5936	141.44	-1.0829	-0.754725
ATP6V0C	519.632	659.31	-0.185087	-0.159029
ATP6V0D1	114.844	150.334	-0.20284	-0.1282
ATP6V0E1	335.128	321.136	0.219273	0.12286
ATP6V0E2	12.9582	9.30824	0.707778	0.200137
ATP6V1A	49.2262	174.523	-1.61879	-4.65566
ATP6V1B2	66.9575	119.95	-0.707209	-1.10291
ATP6V1C1	38.229	68.1447	-0.604658	-0.6292
ATP6V1D	83.2096	95.3279	0.00234867	0.00117949
ATP6V1E1	137.829	119.988	0.381014	0.402428
ATP6V1F	194.907	33.9535	2.69877	9.69922
ATP6V1G1	237.446	201.386	0.397213	0.487747
ATP6V1H	47.6249	140.787	-1.38485	-3.95024
ATP7A	11.965	99.2547	-3.08592	-9.40209
ATP8B2	39.9217	80.4856	-0.926326	-1.06402
ATP9A	18.7285	28.4185	-0.58854	-0.341902
ATP9B	18.071	45.9384	-1.35074	-1.49159
ATPAF1	28.217	13.8737	1.27866	1.36839
ATPAF2	23.369	29.2837	-0.0940658	-0.0398102
ATPIF1	542.2	641.743	-0.0864146	-0.0623488
ATR	22.2021	12.4568	0.875917	0.57857
ATRAID	192.901	120.358	0.843484	1.19714
ATRN	57.3293	27.7302	1.16996	1.41387
ATRNL1	1.39418	32.3883	-3.75191	-4.93858
ATRX	43.3932	58.6767	-0.358781	-0.226329
ATXN1	79.5988	62.028	0.516139	0.196071
ATXN10	225.786	262.381	-0.0603478	-0.0386556
ATXN1L	11.6254	18.1228	-0.457171	-0.262637
ATXN2	99.9798	91.8408	0.261297	0.117411
ATXN2L	150.48	165.017	0.00689762	0.00383757
ATXN7L1	6.61343	40.0694	-2.84963	-3.70585
ATXN7L3	41.205	35.4422	0.303456	0.144623
ATXN7L3B	52.6569	95.7453	-0.699731	-0.861354
AUH	31.0604	56.8294	-0.774369	-0.514465
AUP1	57.1403	192.175	-1.54985	-2.38174
AURKA	26.181	21.943	0.453425	0.128257
AURKAIP1	143.169	162.735	-0.0194689	-0.00813719
AURKB	20.6158	22.303	0.0741919	0.0188395
AUTS2	7.16252	70.7802	-3.47226	-4.9027
AVEN	47.5871	18.9955	1.47425	1.99358
AVL9	16.3647	30.4905	-0.60168	-0.410613
AVPI1	16.5322	24.9907	-0.366278	-0.15444
AXIN1	9.35839	19.5118	-0.816896	-0.57857
AXIN2	16.1989	1.62663	3.64038	3.06468
AXL	107.351	667.309	-2.45371	-6.64788
AZI2	81.4733	66.8669	0.461403	0.462432
AZIN1	372.296	289.746	0.549121	0.2392
AZIN2	3.83897	21.6293	-2.81328	-1.75781
B2M	3802.8	3798.19	0.178488	0.0884053
B3GALNT1	15.5569	12.745	0.469511	0.287933
B3GALNT2	9.65053	27.6165	-1.23572	-1.05394
B3GALT6	9.15874	10.1656	0.11081	0.0338643
B3GAT3	34.6664	34.4838	0.100392	0.0502953
B3GLCT	10.5491	14.8081	-0.21674	-0.0870067
B3GNT2	21.4204	54.3651	-1.12833	-1.11686
B3GNT5	14.3683	2.58362	2.72884	2.33217
B3GNT8	3.33537	12.7084	-2.03971	-0.979564
B3GNT9	46.7168	51.9066	-0.0471559	-0.0191035
B4GALNT1	0.345592	17.1803	-4.39616	-3.89346
B4GALT1	297.063	389.068	-0.215375	-0.170134
B4GALT2	55.6759	28.373	1.16002	0.83263
B4GALT3	38.5558	29.4679	0.577935	0.301633
B4GALT4	24.1769	33.784	-0.239903	-0.0811022
B4GALT5	85.679	87.572	0.148067	0.0602206
B4GALT6	9.00275	22.6699	-1.27108	-1.22818
B4GALT7	25.7447	31.2524	-0.0313532	-0.011596
B4GAT1	22.5077	35.5355	-0.413754	-0.155597
B9D1	36.0246	19.5204	1.02024	0.802696
B9D2	7.88504	13.4401	-0.760662	-0.401487
BACE1	163.761	101.508	0.847217	0.668196
BACE2	66.0025	34.042	1.14681	0.726832
BACH1	34.9117	40.5528	0.0171643	0.00814984
BAD	36.7557	38.2635	0.13697	0.0822473
BAG1	41.1452	240.281	-2.43416	-6.99397
BAG2	67.3658	61.6425	0.297445	0.21114
BAG3	124.773	297.122	-1.11575	-2.03661
BAG4	22.2613	13.4859	0.969618	0.760866
BAG5	25.8596	34.7553	-0.185239	-0.0801053
BAG6	108.582	128.212	-0.0745151	-0.0417301
BAHD1	10.6973	20.9365	-0.994003	-0.690023
BAIAP2	22.8949	122.711	-2.21024	-6.73249
BAIAP2L1	6.03686	22.5478	-2.09193	-1.59693
BAK1	22.646	200.262	-2.91225	-3.43719
BAMBI	102.435	64.6398	0.813192	0.431158
BANF1	242.935	229.304	0.238025	0.113599
BANP	14.0401	36.2785	-1.20147	-1.07909
BAP1	43.1795	30.8715	0.61698	0.651447
BASP1	270.796	164.641	0.869408	0.828268
BAX	99.6561	299.552	-1.42153	-2.14098
BAZ1A	32.8696	20.4613	0.757062	0.544031
BAZ1B	26.1652	53.0328	-0.891057	-1.2839
BAZ2A	59.9092	347.068	-2.42469	-6.7244
BAZ2B	21.4896	46.3188	-1.05396	-0.43783
BBOF1	12.9563	1.16978	3.5401	3.24528
BBS10	16.2206	3.49846	2.37556	2.94698
BBS2	35.6736	11.3831	1.76539	1.68318
BBS4	14.0581	5.79975	1.48932	1.31238
BBS7	30.4089	20.8106	0.737136	0.632055
BBS9	8.21295	13.0125	-0.351763	-0.108131
BBX	50.2197	49.9418	0.110965	0.0630589
BCAM	42.8561	104.004	-1.05258	-1.23033
BCAP29	78.6891	13.9589	2.69565	8.38824
BCAP31	58.9007	123.906	-0.862403	-0.808584
BCAR1	65.1132	250.689	-1.78634	-3.872
BCAR3	37.3319	7.45179	2.46228	2.87251
BCAS2	51.4164	147.641	-1.30204	-2.26664
BCAS3	24.9925	23.6916	0.126399	0.0438288
BCAT1	212.667	59.976	1.98329	1.64258
BCAT2	60.9837	61.7865	0.192291	0.116298
BCCIP	202.55	121.131	0.890809	1.15861
BCHE	21.2778	12.8662	0.992573	0.518923
BCKDHA	104.053	42.0297	1.47961	3.04909
BCKDHB	21.0074	24.3294	-0.0349301	-0.0161807
BCKDK	138.871	118.371	0.400788	0.410613
BCL10	11.6233	75.5427	-2.70746	-6.55734
BCL2	2.11695	10.5202	-2.25259	-1.30615
BCL2L1	87.6347	403.234	-2.02631	-3.36984
BCL2L11	20.0512	24.3439	-0.170897	-0.0565965
BCL2L12	25.2644	23.2066	0.35148	0.183224
BCL2L13	30.6873	31.2918	0.202091	0.096543
BCL2L2	23.4995	27.3319	-0.124419	-0.0595125
BCL2L2-PABPN1	21.3627	27.3319	-0.233555	-0.131701
BCL3	190.064	51.0866	2.05932	4.30067
BCL6	55.6951	33.9828	0.86009	0.811026
BCL7B	31.8817	63.3673	-0.792281	-0.828102
BCL7C	60.1211	48.2414	0.501147	0.465457
BCL9	10.8432	10.9033	0.0597793	0.0219184
BCL9L	80.3114	8.89691	3.34535	4.67807
BCLAF1	80.338	77.0775	0.248016	0.122989
BCOR	11.5621	40.1521	-1.8593	-2.5311
BCORL1	15.8197	17.3043	-0.128875	-0.0511437
BCR	17.8395	23.5595	-0.226294	-0.109659
BCS1L	15.9479	17.7506	0.0620993	0.0275949
BDH2	64.5832	3.06589	4.5498	7.68601
BDNF	7.92466	99.6579	-3.32523	-4.65698
BDP1	15.0792	11.6216	0.356754	0.13181
BECN1	99.3232	112.521	-0.0459143	-0.0308798
BEND4	0	11.8079	-6.03589	-4.21693
BET1	80.1325	79.4788	0.179862	0.122723
BEX3	521.589	3.20049	7.54463	46.8918
BFAR	97.1928	42.8857	1.36724	1.53493
BGN	597.262	15289.5	-4.51246	-18.0201
BHLHB9	5.53325	32.1005	-2.70441	-3.7222
BHLHE40	83.7537	114.508	-0.294942	-0.163993
BHLHE41	4.71186	14.6749	-1.20751	-0.412498
BHMT2	11.7795	0	7.09573	0.825001
BICC1	147.488	213.663	-0.35699	-0.137825
BICD1	26.4674	37.4877	-0.393207	-0.170292
BICD2	11.7143	41.2844	-1.69137	-2.31702
BICDL1	0.276473	14.2638	-4.39683	-3.16796
BID	32.6586	9.01057	2.09581	2.31328
BIN1	86.0849	91.3179	0.0330631	0.0145437
BIN3	38.5151	42.4338	-0.052153	-0.0214517
BIRC2	48.7145	3.35352	4.05209	11.6318
BIRC3	1.06836	46.0965	-6.63504	-8.2533
BIRC5	49.3971	40.7895	0.419335	0.0931206
BIRC6	43.5788	82.0886	-0.816562	-1.13525
BIRC8	0	49.9161	-8.13373	-9.52776
BIVM	18.8134	16.5629	0.415653	0.265951
BLCAP	79.1893	70.8113	0.313012	0.255651
BLMH	48.5884	48.1501	0.161963	0.0821173
BLOC1S2	34.6524	17.8118	1.16851	0.968736
BLOC1S4	32.1507	21.9304	0.69509	0.672756
BLOC1S6	88.8421	46.8828	1.0677	1.82241
BLVRA	43.8214	43.1819	0.24417	0.139673
BLVRB	116.677	79.4499	0.70441	0.956384
BLZF1	20.2927	26.6919	-0.115741	-0.040167
BMF	9.32648	20.4015	-1.07301	-0.585173
BMP1	59.1413	156.751	-1.24161	-3.52603
BMP2K	20.4486	48.3791	-0.980077	-1.01682
BMP3	0.426524	35.5597	-6.04069	-3.95183
BMP4	14.9372	8.63721	1.07739	0.481185
BMP6	0.207355	108.224	-7.56889	-14.1834
BMPER	45.7693	65.7285	-0.410187	-0.129383
BMPR1A	11.2284	122.025	-3.11655	-6.06454
BMPR2	13.2921	15.1608	-0.198713	-0.0561181
BMS1	34.7616	42.8499	-0.0712323	-0.0329177
BMT2	9.70196	31.3132	-1.30595	-0.788794
BMX	1.54423	12.2814	-2.50868	-1.04466
BNC1	4.51423	17.9507	-1.77815	-0.499497
BNC2	39.0074	3.33034	3.69186	4.87197
BNIP1	15.5489	15.0969	0.254818	0.128506
BNIP2	78.893	325.408	-1.8962	-8.29599
BNIP3	101.178	120.327	-0.0777717	-0.0220644
BNIP3L	657.664	194.234	1.91744	6.35861
BOC	16.0471	25.2534	-0.63657	-0.23991
BOD1L1	37.2163	50.5466	-0.371635	-0.179345
BOK	88.5678	36.9784	1.43672	2.93971
BOLA1	15.7108	35.6039	-0.974078	-0.887335
BOLA3	52.3617	102.996	-0.77328	-0.557971
BORCS5	16.5463	16.1826	0.0768164	0.0271739
BORCS6	6.87013	25.2526	-1.85568	-1.92193
BPGM	19.5595	15.5121	0.555896	0.299309
BPHL	27.2986	33.8868	-0.158007	-0.0950957
BPNT1	26.6508	21.098	0.449766	0.291283
BPTF	34.9572	50.6153	-0.455703	-0.208527
BRAF	28.5273	39.5832	-0.404623	-0.204395
BRAP	20.7685	44.338	-0.863802	-0.938702
BRAT1	12.269	16.0631	-0.342278	-0.142974
BRCC3	18.1597	23.1795	-0.0884059	-0.0397746
BRD1	23.8135	57.7284	-1.15287	-1.97807
BRD2	121.194	42.6698	1.64452	2.81945
BRD3	19.8124	45.3224	-0.92695	-1.01121
BRD4	40.9918	85.0349	-0.980258	-1.07879
BRD7	58.7743	60.0666	0.0733309	0.0367791
BRD8	26.6174	31.6012	-0.191908	-0.0924117
BRD9	30.875	51.0577	-0.573195	-0.585647
BRE	55.7253	55.3452	0.211756	0.13651
BRF1	13.1617	27.9167	-0.811078	-0.717216
BRF2	19.9172	14.6615	0.618653	0.50959
BRI3	163.659	304.438	-0.72231	-0.992003
BRI3BP	7.00635	41.5646	-2.12992	-2.3903
BRIX1	44.5449	46.1574	0.0726194	0.0316228
BRK1	310.251	329.809	0.0772984	0.0461848
BRMS1	46.3056	30.5883	0.696026	0.612527
BRMS1L	9.0267	17.8966	-0.661994	-0.299396
BRPF1	8.68287	21.2719	-1.07135	-0.852727
BRPF3	35.0639	16.1611	1.20294	0.892362
BRWD1	20.5354	46.1247	-0.996073	-1.39519
BRWD3	9.0996	21.1703	-1.33147	-0.955216
BSCL2	56.9962	78.3401	-0.323517	-0.200579
BSDC1	48.3987	26.824	0.955693	1.18906
BSG	802.062	1599.78	-0.839415	-1.20115
BST1	21.0231	113.134	-2.21409	-1.36306
BST2	1.49489	573.297	-9.30144	-18.8723
BTAF1	35.6857	20.6891	0.85881	0.696411
BTBD1	40.2296	59.8811	-0.359574	-0.246856
BTBD10	24.1113	37.8673	-0.407094	-0.248851
BTBD19	19.7553	27.0695	-0.431037	-0.201351
BTBD2	57.0172	47.7083	0.394975	0.304792
BTBD3	33.9827	26.7835	0.486418	0.311194
BTBD6	14.0502	12.12	0.43785	0.235926
BTBD7	26.8864	51.6595	-0.905096	-0.625577
BTBD9	8.08469	23.1692	-1.64296	-1.40694
BTD	20.9398	29.4269	-0.305763	-0.165711
BTF3	1341.27	271.464	2.45955	11.3107
BTF3L4	12.6723	185.233	-3.55722	-3.04831
BTG1	389.048	163.339	1.43003	1.39557
BTG2	331.828	209.976	0.846462	0.32473
BTRC	13.2626	20.7383	-0.560036	-0.282213
BUB1	21.0388	2.97961	3.01426	2.79033
BUB1B	10.1757	5.50237	1.09385	0.283718
BUB3	99.8394	96.8359	0.22556	0.105967
BUD13	16.3172	22.5459	-0.262602	-0.154875
BUD31	209.117	128.542	0.865802	1.16564
BVES	10.1721	3.62717	1.63478	0.383284
BYSL	34.2125	32.3596	0.23849	0.146622
BZW1	380.699	162.299	1.3828	1.81745
BZW2	125.009	56.4308	1.31045	1.64719
C10orf10	1284.6	7.67044	7.61952	10.7636
C10orf2	16.2129	12.3823	0.541776	0.284421
C10orf54	120.446	20.1434	2.77365	8.05306
C10orf76	16.8526	5.81484	1.57713	1.39812
C10orf88	8.41051	16.3711	-0.904678	-0.626337
C11orf1	20.3417	39.0786	-0.661497	-0.522437
C11orf24	63.9563	71.2088	0.0159372	0.00762054
C11orf31	252.738	56.4548	2.30531	3.61429
C11orf49	42.5575	27.1286	0.872523	0.782292
C11orf52	2.92066	20.9449	-3.33455	-2.59433
C11orf54	19.1116	0.306058	5.91606	5.00015
C11orf57	45.8435	19.4359	1.40251	2.8761
C11orf58	252.111	99.5622	1.50762	3.87764
C11orf68	42.9352	33.4604	0.495776	0.415167
C11orf70	21.3905	15.5015	0.686527	0.53323
C11orf74	30.9522	36.7134	0.00937147	0.00352103
C11orf84	17.19	25.9215	-0.296908	-0.125165
C11orf95	22.4113	40.8088	-0.82319	-0.49298
C11orf96	33.8316	25.7064	0.507798	0.201781
C12orf10	83.9596	38.2392	1.26064	2.06555
C12orf29	34.0011	12.1566	1.73127	2.10322
C12orf4	20.7844	20.6687	0.179948	0.0867823
C12orf43	15.6142	66.9395	-1.90995	-4.23922
C12orf45	25.6776	22.2329	0.423862	0.262956
C12orf49	25.304	11.8581	1.30422	1.4857
C12orf57	344.068	165.075	1.21405	1.26522
C12orf65	19.169	12.6065	0.829142	0.558818
C12orf66	4.25753	11.0326	-1.4859	-0.979411
C12orf73	22.0498	2.82713	3.16802	5.30866
C12orf75	17.5256	28.7534	-0.494765	-0.152727
C14orf1	101.124	75.1694	0.600302	0.469142
C14orf119	85.7679	13.9455	2.79955	5.27632
C14orf159	45.3991	44.1803	0.147652	0.0691199
C14orf166	459.518	331.583	0.628518	1.00813
C14orf169	20.6718	6.9447	1.60548	1.41104
C14orf2	253.749	359.992	-0.349796	-0.177285
C14orf37	47.5569	9.17924	2.52027	3.25342
C14orf79	6.27763	24.471	-1.66623	-1.39812
C14orf93	15.4325	7.99382	1.01268	0.546545
C15orf39	35.0561	79.6433	-1.02285	-1.01782
C15orf40	10.1657	40.7511	-1.68181	-1.71388
C15orf41	24.7754	7.91564	1.71647	1.73324
C15orf52	2.267	28.173	-3.71159	-5.21745
C15orf57	36.7259	33.1437	0.353949	0.269107
C15orf61	30.1658	16.7595	1.02765	0.766846
C15orf65	7.65406	18.8154	-1.26187	-0.942557
C16orf13	105.751	38.3743	1.6382	1.26363
C16orf45	36.874	0	8.67431	8.47067
C16orf52	14.5499	31.755	-0.979855	-1.06635
C16orf58	48.225	30.3054	0.784172	0.892488
C16orf62	28.2982	55.7882	-0.756774	-0.843124
C16orf70	14.7277	50.2048	-1.7445	-2.76322
C16orf72	89.421	81.8638	0.265205	0.200911
C16orf87	22.7646	80.0158	-1.64487	-3.24487
C16orf91	23.1441	38.9999	-0.738014	-0.509164
C17orf62	32.5058	37.2375	-0.0489458	-0.0248462
C17orf75	14.3505	14.0904	0.110828	0.0462667
C17orf80	12.0992	5.40266	1.3084	1.01648
C17orf89	85.1566	39.8926	1.29073	2.27911
C18orf21	51.6452	16.8539	1.71775	2.89586
C18orf25	12.2434	20.2063	-0.422406	-0.237219
C18orf32	81.2957	112.486	-0.291245	-0.217136
C18orf54	16.3071	11.6275	0.608314	0.275064
C18orf8	18.4025	32.6888	-0.588356	-0.494133
C19orf12	12.1051	26.4987	-0.82362	-0.670372
C19orf24	64.2852	11.3613	2.61423	6.71836
C19orf25	27.7986	52.4726	-0.841729	-0.891788
C19orf43	361.317	180.222	1.15795	3.07701
C19orf47	8.19904	10.3979	-0.138552	-0.051067
C19orf52	18.6314	19.9455	0.0611253	0.0248462
C19orf53	404.935	201.983	1.15768	2.14265
C19orf54	15.7958	26.3379	-0.631902	-0.429408
C19orf60	45.5693	127.935	-1.39375	-3.10221
C19orf66	53.9641	34.867	0.731183	0.572557
C19orf70	106.623	134.654	-0.156084	-0.114084
C1D	5.1936	95.802	-3.77627	-10.3511
C1GALT1	13.8292	18.8433	-0.155897	-0.0605394
C1GALT1C1	71.5762	57.4944	0.437258	0.389118
C1QA	0	63.9058	-8.46154	-8.90597
C1QB	0	103.486	-9.17232	-11.4039
C1QBP	234.746	135.204	0.948466	0.802448
C1QC	0	140.333	-9.60879	-12.4037
C1QTNF1	610.036	47.8305	3.86122	8.69222
C1QTNF2	0.41471	32.7996	-5.08555	-6.04385
C1QTNF5	32.765	72.0393	-1.03808	-0.853223
C1QTNF6	85.4503	222.773	-1.23677	-0.980486
C1QTNF7	4.18456	32.9613	-3.15709	-2.43375
C1RL	111.243	16.6414	2.90518	4.64086
C1orf122	124.585	36.5542	1.9202	5.38308
C1orf123	101.29	36.2129	1.62779	2.37969
C1orf131	13.7501	26.7584	-0.705974	-0.59043
C1orf174	32.5953	20.6972	0.81953	0.8905
C1orf198	163.421	471.816	-1.34712	-0.625263
C1orf21	40.67	144.953	-1.65856	-3.89682
C1orf216	20.117	31.0451	-0.609243	-0.248851
C1orf27	18.3198	39.2917	-1.01671	-1.10319
C1orf35	13.0786	17.5071	-0.260152	-0.131701
C1orf43	168.358	10.4415	4.17617	16.8647
C1orf50	15.5294	22.1175	-0.339538	-0.218735
C1orf52	47.5339	30.213	0.824479	1.09747
C1orf53	12.7904	32.7497	-1.20942	-1.50493
C1orf54	14.8343	38.8988	-1.28745	-1.6994
C2	12.1824	38.3924	-1.62543	-0.661288
C20orf194	14.0327	86.0252	-2.68001	-5.55156
C20orf27	66.4472	107.062	-0.506138	-0.366707
C20orf96	10.2052	1.26081	3.34534	2.15837
C21orf2	12.8556	36.5528	-1.37933	-1.88731
C21orf91	17.3164	9.68666	1.0001	0.910332
C22orf23	0.910352	15.1362	-3.34895	-3.16001
C22orf29	22.6087	4.37027	2.62257	3.9488
C22orf39	40.634	14.7576	1.63341	2.62904
C2CD2	18.849	18.4565	0.0565513	0.0168198
C2CD2L	6.93129	20.1552	-1.38726	-1.4169
C2CD5	11.1929	8.21584	0.446263	0.174221
C2orf40	1.55219	140.914	-6.53732	-6.25089
C2orf42	56.8465	13.4336	2.20016	4.7102
C2orf47	24.8006	44.5243	-0.675425	-0.736417
C2orf49	31.3786	19.9564	0.8178	0.825575
C2orf68	21.947	18.4462	0.414795	0.256091
C2orf69	15.9104	7.7707	1.20141	1.1069
C2orf74	12.1979	0	7.17535	5.23878
C2orf76	10.2705	5.98072	0.921038	0.528241
C3	1934.57	178.865	3.64324	2.98437
C3AR1	1.49874	47.864	-4.97403	-4.67264
C3orf14	11.1771	35.6589	-1.30158	-0.845877
C3orf38	21.8286	37.1965	-0.500945	-0.349976
C3orf58	31.9532	53.0101	-0.50098	-0.251923
C4orf3	345.814	68.2069	2.51084	5.82234
C4orf32	38.4622	7.94636	2.35155	4.09766
C4orf33	11.7577	3.97318	1.57094	1.17623
C4orf46	10.8551	7.26361	0.859781	0.324161
C4orf48	91.9369	25.1879	2.02244	4.43346
C5AR1	1.2066	24.1152	-4.88593	-4.14483
C5orf15	220.85	260.293	-0.0849683	-0.04726
C5orf22	21.26	16.4104	0.637566	0.443071
C5orf24	70.0421	135.309	-0.810355	-1.47972
C5orf30	21.89	14.5392	0.66177	0.516637
C5orf34	7.2928	46.7518	-2.75014	-4.81285
C5orf42	29.0054	21.3945	0.508788	0.200137
C5orf45	10.3021	5.07287	1.06025	0.575501
C5orf51	25.1126	45.5363	-0.595526	-0.380705
C6orf106	15.4168	19.6858	-0.350959	-0.153048
C6orf120	39.1019	76.6982	-0.756807	-1.01943
C6orf136	15.4184	54.0093	-1.55336	-1.62771
C6orf141	5.56869	14.2504	-1.4046	-0.483025
C6orf203	14.0956	24.1694	-0.521632	-0.358567
C6orf226	24.2666	36.6179	-0.442704	-0.163283
C6orf47	23.1693	32.2917	-0.332333	-0.20237
C6orf62	169.407	446.007	-1.23286	-2.29991
C6orf89	74.9021	128.735	-0.6653	-0.819548
C7	608.106	4.3401	7.39268	16.2193
C7orf25	10.8294	14.3742	-0.102632	-0.0326941
C7orf26	24.9129	20.3071	0.478032	0.315041
C7orf31	11.9432	0.404634	5.13166	3.30876
C7orf43	16.3307	22.4113	-0.3196	-0.144623
C7orf49	31.4374	12.2147	1.50737	1.90023
C7orf50	115.497	10.6738	3.55769	13.3128
C7orf55	31.7948	13.5208	1.35313	1.06635
C8orf33	49.0825	41.8449	0.364838	0.309521
C8orf37	3.17736	12.6308	-1.80883	-1.5028
C8orf4	16.766	63.9263	-1.88781	-0.970746
C8orf48	5.30998	20.5297	-1.77845	-1.86498
C8orf59	164.982	136.613	0.438997	0.309492
C9	154.471	0.153029	9.82302	12.5288
C9orf114	25.9363	16.6191	0.700028	0.545148
C9orf116	16.3603	6.12342	1.60235	0.782292
C9orf142	20.8535	34.2104	-0.541456	-0.38813
C9orf16	107.988	168.559	-0.474769	-0.274143
C9orf3	45.1888	21.624	1.19744	0.931147
C9orf40	10.9617	18.6981	-0.619948	-0.372523
C9orf64	14.8518	55.9281	-1.60082	-2.02413
C9orf72	3.54658	10.4373	-1.48262	-0.888874
C9orf78	82.7899	72.7622	0.31203	0.165299
C9orf85	16.2046	42.8052	-1.1356	-1.33238
CA12	38.7732	2.81735	4.01203	1.92604
CA13	7.71907	51.4757	-2.52379	-3.95709
CA5B	3.09642	13.8201	-1.91445	-1.12494
CAAP1	21.8605	26.4976	-0.0975746	-0.0491467
CAB39	48.5434	71.0543	-0.449126	-0.340807
CAB39L	10.9301	51.1264	-1.95538	-3.53918
CABIN1	28.5936	38.9588	-0.242682	-0.111713
CABLES1	20.8222	15.2705	0.676917	0.218479
CACFD1	13.5784	32.287	-1.19468	-1.48886
CACHD1	2.92066	15.6361	-2.93403	-2.06216
CACNA1C	11.179	2.71123	2.22144	0.757476
CACNA2D1	89.2337	53.8842	0.870927	0.475449
CACNB3	17.6856	80.1643	-2.02671	-4.60211
CACNG7	10.1503	20.1061	-0.84373	-0.582131
CACTIN	21.1217	24.1558	-0.115547	-0.0544273
CACUL1	46.5048	76.4916	-0.548647	-0.625577
CACYBP	104.229	97.5295	0.269897	0.107473
CAD	43.5214	33.3669	0.466532	0.272434
CADM1	2.10899	22.5341	-2.92527	-2.34501
CADM3	288.276	3.63109	6.5012	10.3372
CADPS2	14.1254	2.26947	2.6694	2.39498
CALB2	39.7488	0.137393	7.88274	6.81933
CALCOCO1	42.9333	34.9996	0.400956	0.190813
CALCOCO2	167.511	0	10.8963	15.9555
CALCRL	31.2224	45.975	-0.326222	-0.229237
CALD1	568.389	1171.67	-0.888148	-0.605336
CALHM2	119.997	46.5916	1.51831	1.54376
CALM1	521.993	1437.78	-1.30581	-1.49492
CALM3	306.143	448.411	-0.382253	-0.4341
CALR	3862.1	2142.31	0.98791	0.783924
CALU	808.578	1186.79	-0.391191	-0.257515
CAMK1	29.4197	202.811	-2.65646	-7.85232
CAMK2D	269.801	149.914	1.02491	0.665792
CAMK2G	18.5546	55.0375	-1.47018	-2.12615
CAMK2N1	97.2507	116.567	-0.119282	-0.0396804
CAMKK2	12.5969	33.6863	-1.16355	-0.898943
CAMLG	82.0496	59.0777	0.658385	0.708771
CAMSAP1	17.5674	10.8375	0.736461	0.405749
CAMSAP2	7.65791	28.2647	-1.78228	-2.09927
CAMTA1	80.6887	25.4236	1.83241	3.9164
CAMTA2	56.0441	21.4462	1.58736	1.73605
CAND1	85.0287	85.4337	0.186406	0.130767
CANT1	49.1472	55.8261	-0.0679633	-0.0389226
CANX	735.777	634.487	0.374166	0.482467
CAP1	289.385	361.915	-0.16161	-0.0640433
CAP2	16.0292	9.72097	0.959277	0.292327
CAPG	31.0546	80.1845	-1.27051	-1.51405
CAPN1	157.447	70.5209	1.33226	2.75711
CAPN10	12.6267	23.3518	-0.955298	-0.592003
CAPN15	18.4677	15.022	0.325938	0.147325
CAPN2	188.103	336.775	-0.673289	-0.73763
CAPN5	55.2714	8.94858	2.76793	4.24662
CAPN6	0	14.2021	-6.23125	-3.65635
CAPN7	12.1704	28.5056	-0.951568	-0.893402
CAPNS1	683.659	936.021	-0.301047	-0.186232
CAPRIN1	392.416	373.075	0.229774	0.163811
CAPRIN2	17.5574	3.95055	2.26152	1.84332
CAPZA2	147.238	217.519	-0.385025	-0.215118
CAPZB	414.1	416.889	0.138016	0.0794973
CARD10	11.0781	10.3275	0.227604	0.0694391
CARD19	41.7817	120.401	-1.41099	-1.77573
CARD6	13.7477	3.80397	1.99673	1.16738
CARHSP1	427.389	10.1329	5.55002	29.1024
CARM1	42.2672	36.8044	0.42012	0.326256
CARNMT1	41.5391	19.993	1.13753	0.848288
CARS	74.3796	82.2082	0.042556	0.0171201
CARS2	118.591	25.588	2.35527	9.50745
CASC3	64.0589	48.8479	0.508423	0.47216
CASC4	64.8445	40.7787	0.860952	0.977069
CASD1	11.262	21.9879	-0.968586	-0.651993
CASK	21.2798	52.0063	-1.04337	-1.47961
CASKIN2	4.94872	19.8044	-1.89615	-1.63399
CASP2	10.8415	6.97429	0.838007	0.469142
CASP3	92.0743	38.8595	1.42397	2.55423
CASP5	0	30.9228	-7.44504	-7.84543
CASP6	18.5011	33.7698	-0.753791	-0.634086
CASP7	25.2156	21.2652	0.379553	0.258773
CASP8	21.335	42.7313	-0.833236	-0.915859
CASP9	9.52202	24.3359	-1.29646	-1.02484
CASQ2	0	48.2641	-7.87644	-2.14117
CAST	142.744	142.978	0.152599	0.0887874
CAT	100.238	96.881	0.17494	0.111147
CAV1	571.644	428.63	0.588064	0.24672
CAV2	115.06	32.92	1.99236	2.23345
CAV3	0	18.5469	-6.64703	-4.84981
CBFA2T2	11.1318	13.4847	-0.320766	-0.120454
CBFB	44.6927	33.8318	0.562011	0.530555
CBL	10.7998	59.3727	-2.25681	-5.38928
CBLB	69.6311	77.8389	-0.039769	-0.0182567
CBLL1	23.3214	16.8006	0.667253	0.546665
CBR3	20.0554	32.4291	-0.668969	-0.382437
CBR4	33.3786	20.0994	0.868011	0.720988
CBX1	125.734	104.207	0.419401	0.560932
CBX3	357.443	97.6308	2.03156	6.58615
CBX4	46.1931	45.4444	0.123721	0.0678421
CBX5	134.779	61.4835	1.28064	3.17183
CBX6	105.746	99.722	0.229202	0.132874
CBX8	10.3712	11.3155	-0.0985785	-0.0333045
CBY1	30.2592	26.8667	0.331928	0.229237
CC2D1A	23.1577	23.3202	0.0741494	0.0346603
CC2D1B	17.2177	22.9329	-0.338919	-0.188021
CC2D2A	42.25	11.5216	2.02245	1.47616
CCAR1	53.9536	87.0068	-0.564858	-0.614843
CCAR2	59.953	27.8053	1.25444	2.58921
CCBE1	20.9344	8.95949	1.3371	0.501
CCDC102A	12.9227	51.0392	-2.01185	-2.97362
CCDC106	90.8164	0	10.0069	13.1238
CCDC107	29.9036	45.9219	-0.383707	-0.253825
CCDC109B	34.6423	5.53895	2.79106	3.50906
CCDC115	30.6908	25.1186	0.493656	0.296031
CCDC117	18.2209	7.66458	1.52307	1.36107
CCDC12	49.2324	22.8665	1.19861	1.0397
CCDC122	14.4277	17.6606	-0.00317657	-0.0010216
CCDC124	80.5754	56.246	0.63587	0.540206
CCDC126	11.5917	18.8324	-0.559615	-0.385727
CCDC127	15.9739	92.2265	-2.33548	-5.18606
CCDC130	24.4036	12.1075	1.13571	0.97709
CCDC134	9.57345	16.4239	-0.472859	-0.231121
CCDC136	3.4695	10.8581	-1.36623	-0.672734
CCDC137	32.6171	16.8533	1.04623	1.07525
CCDC14	17.7647	2.04859	3.10211	2.63494
CCDC141	0	11.4911	-5.95547	-3.87026
CCDC149	33.0874	0.153029	7.56836	4.96954
CCDC157	2.55529	10.7277	-2.14734	-1.48552
CCDC159	14.5853	4.49203	1.82078	1.91651
CCDC167	30.4125	6.54116	2.43851	3.49462
CCDC174	26.6237	17.4353	0.812997	0.672734
CCDC186	14.777	50.7639	-1.69667	-3.35941
CCDC22	27.3322	16.4456	0.811821	0.579217
CCDC25	35.1422	38.0876	0.101827	0.0357591
CCDC28A	20.8193	16.7106	0.565015	0.320779
CCDC28B	24.6562	11.704	1.21843	1.1779
CCDC3	3.08846	14.115	-1.7079	-1.0532
CCDC34	17.0004	28.2155	-0.511458	-0.261104
CCDC43	30.7345	16.807	1.1088	1.02174
CCDC47	107.547	116.266	0.07663	0.0439097
CCDC50	66.5547	48.5478	0.653667	0.767571
CCDC51	14.5478	3.0631	2.34985	2.30364
CCDC53	63.2633	78.5373	-0.108886	-0.0593783
CCDC58	12.6799	21.8949	-0.465647	-0.227368
CCDC59	63.5693	38.7849	0.891854	1.12387
CCDC6	64.5508	66.5642	0.0637063	0.0260039
CCDC61	13.0375	13.3236	-0.0371107	-0.0103512
CCDC66	12.9959	13.4778	-0.10997	-0.0350131
CCDC68	2.89292	47.1679	-3.61984	-4.87429
CCDC69	28.3692	2.08572	3.97928	3.09408
CCDC71	35.4381	65.8024	-0.672663	-0.516156
CCDC71L	61.1155	22.9089	1.56025	1.34144
CCDC8	53.0181	0	9.21769	10.6673
CCDC80	2042.7	358.837	2.71041	3.02184
CCDC84	2.30453	11.1522	-1.69072	-0.903638
CCDC85C	10.4326	4.88158	1.11233	0.567937
CCDC86	48.1938	38.4137	0.490677	0.503966
CCDC88A	45.6031	19.6567	1.32074	0.874206
CCDC9	23.8826	34.1616	-0.39433	-0.310623
CCDC90B	69.2994	50.3165	0.650367	0.610792
CCDC91	19.6983	17.9041	0.255262	0.122903
CCDC92	32.566	4.72045	2.93342	4.11315
CCDC93	11.8523	30.8991	-1.1141	-1.20115
CCDC94	18.7812	17.5085	0.294446	0.116916
CCDC97	25.9085	42.3906	-0.619831	-0.600904
CCL17	0	11.602	-5.98431	-3.98167
CCL2	1659.31	447.432	2.01041	1.68034
CCL7	2.92836	315.007	-6.65625	-10.251
CCM2	48.016	36.8103	0.601507	0.538834
CCNA2	52.6557	67.6652	-0.207099	-0.0405022
CCNB1	101.196	1.63641	6.08619	1.81616
CCNB1IP1	22.7706	0.290421	6.29847	4.09644
CCNB2	56.246	38.203	0.713089	0.167829
CCNC	59.9647	45.3864	0.599797	0.346145
CCND2	42.6772	220.709	-2.1692	-1.7079
CCND3	101.476	153.137	-0.427797	-0.289678
CCNDBP1	40.8491	54.2967	-0.182736	-0.0929946
CCNE1	8.95935	15.9277	-0.619252	-0.33386
CCNF	11.2559	6.24155	1.07574	0.512736
CCNG1	252.293	550.075	-0.98261	-0.68362
CCNG2	19.2103	36.0608	-0.769885	-0.855785
CCNH	52.273	54.5729	0.128515	0.0689325
CCNI	511.495	39.6941	3.86847	8.21744
CCNK	54.0048	0.726328	6.47756	10.4766
CCNL1	118.1	118.725	0.140868	0.0502953
CCNL2	28.2824	82.8509	-1.51572	-1.57145
CCNT1	28.8074	42.2096	-0.364599	-0.310807
CCNT2	24.6629	26.538	-0.0163289	-0.00670266
CCNY	77.6339	163.868	-0.897446	-0.963964
CCNYL1	184.509	42.3496	2.28798	2.07627
CCPG1	64.195	81.1993	-0.129683	-0.0549197
CCS	42.1977	34.9801	0.465354	0.379365
CCSAP	11.2263	4.27115	1.53934	1.20666
CCSER2	29.4596	35.2118	-0.096234	-0.043034
CCT2	185.191	219.207	-0.081855	-0.0337626
CCT3	246.09	201.574	0.438733	0.257597
CCT4	289.81	273.915	0.243874	0.216614
CCT5	182.163	390.998	-0.946859	-0.568619
CCT7	209.75	41.6902	2.49038	4.34927
CCT8	233.549	248.66	0.0720773	0.0350131
CD109	63.3165	74.9081	-0.0913887	-0.0329832
CD14	11.3053	20.2537	-0.529666	-0.183139
CD151	264.923	694.327	-1.22965	-3.10027
CD163	0.0691183	19.8533	-6.0388	-4.51261
CD164	529.636	437.298	0.4413	0.409854
CD180	0	13.7383	-6.21415	-4.07712
CD200	175.062	327.781	-0.768837	-0.367571
CD248	122.964	54.0135	1.33461	3.37446
CD276	48.6178	18.7199	1.58274	2.42333
CD2AP	27.7591	49.0819	-0.688647	-0.687531
CD2BP2	43.0011	47.5464	-0.0021164	-0.000992856
CD302	89.2299	102.832	-0.0530334	-0.0191035
CD320	54.3779	20.9924	1.57648	2.42137
CD34	24.5777	124.294	-2.10676	-1.54685
CD36	3.13597	64.4822	-4.92632	-3.59091
CD38	6.77889	274.763	-5.17587	-6.07978
CD3EAP	9.27335	20.2538	-0.802784	-0.470762
CD40	16.7853	26.6227	-0.650452	-0.290252
CD44	363.021	186.714	1.12936	0.794606
CD46	141.427	0.137393	9.70362	12.2831
CD47	56.4277	323.968	-2.33649	-8.61674
CD53	0	18.3951	-6.65925	-5.45115
CD63	920.119	1236.08	-0.258702	-0.219493
CD68	125.49	97.4625	0.539932	0.240687
CD7	0.552947	12.0739	-3.53703	-1.37683
CD74	11.8209	0	6.96364	4.01877
CD81	1781.78	1500.99	0.42857	0.232455
CD82	19.0761	28.0736	-0.54472	-0.217949
CD84	0	14.4311	-6.30277	-4.60757
CD9	104.036	195.805	-0.72223	-0.753617
CD93	13.5289	29.3255	-0.805295	-0.347493
CD99L2	73.2593	50.5642	0.692477	0.844357
CDA	3.62365	35.4175	-3.54281	-4.145
CDADC1	11.8682	42.2151	-1.67263	-2.69979
CDAN1	8.3532	25.9091	-1.61738	-1.7058
CDC123	92.9275	45.6553	1.21442	1.67954
CDC14B	7.86937	13.7403	-0.851983	-0.480287
CDC16	33.4445	99.1059	-1.34627	-1.9354
CDC20	43.0701	21.067	1.19022	0.442418
CDC23	21.8939	26.6014	-0.025607	-0.011596
CDC25B	98.1036	9.47555	3.49213	5.44721
CDC25C	10.2685	4.99638	1.22013	0.327708
CDC26	25.8058	24.3012	0.307346	0.204232
CDC27	45.3636	76.1169	-0.544201	-0.442418
CDC37	239.874	246.636	0.110941	0.0841072
CDC37L1	24.4435	44.4	-0.744197	-0.819868
CDC40	39.6841	47.0021	-0.0154271	-0.00684102
CDC42	287.694	343.319	-0.0991926	-0.0395545
CDC42BPA	41.6871	43.3551	0.0174143	0.00791753
CDC42BPB	54.5641	59.9138	-0.0220475	-0.0133229
CDC42EP1	192.712	203.721	0.0759921	0.0485413
CDC42EP2	103.03	1.36693	6.56036	17.646
CDC42EP3	2.85748	114.121	-4.7143	-6.80315
CDC42EP4	213.178	85.5011	1.46912	1.60608
CDC42EP5	83.2107	153.767	-0.715672	-0.745129
CDC42SE1	91.1614	119.133	-0.25506	-0.188665
CDC42SE2	22.9803	55.2978	-1.02645	-1.14034
CDC45	16.0543	6.94415	1.399	0.598426
CDC5L	42.0837	18.1957	1.39074	1.98146
CDC7	11.0385	4.61324	1.44204	0.786599
CDC73	91.657	50.2093	1.01267	0.78653
CDCA2	12.8338	7.77184	0.970888	0.421988
CDCA3	28.8938	32.0944	0.0189318	0.00386468
CDCA4	18.9673	55.5799	-1.33009	-1.70823
CDCA5	15.3058	7.14075	1.26702	0.461211
CDCA7	19.2517	2.85786	2.89439	4.20284
CDCA7L	25.9973	2.97207	3.32862	5.40959
CDCA8	19.7947	26.0586	-0.172662	-0.0459747
CDH11	256.251	131.458	1.12695	1.23676
CDH13	129.521	29.2381	2.31312	1.38402
CDH19	30.464	5.75983	2.50186	1.64034
CDH2	115.794	584.76	-2.17643	-2.62296
CDH3	0.483828	24.1503	-4.6888	-2.19082
CDH5	36.1473	31.2565	0.437688	0.251762
CDH6	28.8643	1.0916	4.77063	3.96905
CDIP1	53.7581	51.4458	0.245487	0.184322
CDIPT	107.398	143.998	-0.269708	-0.16393
CDK1	65.1741	35.5359	1.02072	0.351934
CDK10	25.9438	27.6754	0.149398	0.0668243
CDK12	28.7248	21.6224	0.464325	0.198233
CDK13	33.1679	37.6142	-0.121794	-0.0590538
CDK14	33.8335	58.5919	-0.676178	-0.717992
CDK16	108.467	153.063	-0.312691	-0.177022
CDK17	45.2293	28.0002	0.78655	0.720093
CDK18	11.9434	54.0566	-2.29295	-2.02413
CDK19	12.9031	15.9008	-0.274732	-0.0906109
CDK2	24.1254	23.0561	0.310724	0.181548
CDK2AP2	87.2296	105.335	-0.0810062	-0.0471719
CDK4	165.402	230.099	-0.318287	-0.16139
CDK5	28.0985	71.184	-1.20763	-1.6121
CDK5RAP1	16.1988	5.38171	1.84602	1.16778
CDK5RAP2	32.271	6.37364	2.44785	1.99184
CDK5RAP3	23.3869	53.8867	-1.08298	-1.74421
CDK6	45.5945	23.3831	1.1278	1.75188
CDK7	47.3086	67.5938	-0.307339	-0.240073
CDK8	22.1629	121.379	-2.27785	-3.53661
CDK9	43.4601	50.7717	-0.050318	-0.0297607
CDKAL1	26.4417	32.6103	-0.153571	-0.0899069
CDKL3	10.8669	4.31051	1.39735	0.841083
CDKN1A	400.93	642.8	-0.531913	-0.350354
CDKN1B	73.9341	191.861	-1.18619	-1.85033
CDKN1C	105.208	196.713	-0.753767	-0.540903
CDKN2AIP	8.19317	12.5317	-0.237755	-0.0739018
CDKN2AIPNL	71.9587	26.9022	1.60459	2.50738
CDKN2B	8.24245	119.621	-3.79928	-4.28046
CDKN2C	15.5728	13.6233	0.268651	0.135775
CDKN3	39.3286	18.4828	1.25001	0.473154
CDO1	7.39149	18.7218	-1.0955	-0.516093
CDON	11.4656	38.1917	-1.44852	-1.035
CDPF1	6.93129	10.1879	-0.394883	-0.15879
CDR2	36.3555	49.1379	-0.233808	-0.111701
CDR2L	45.135	32.4889	0.558282	0.315495
CDS2	40.94	68.942	-0.543882	-0.584118
CDT1	0.207355	10.7207	-4.32079	-2.77939
CDV3	267.837	147.987	1.01917	1.53295
CEBPA	2.06761	32.4774	-5.21062	-4.25079
CEBPB	266.784	419.316	-0.493404	-0.533686
CEBPD	0.898538	973.948	-9.03491	-25.3851
CEBPG	32.4338	58.8856	-0.636765	-0.313178
CEBPZ	47.3902	46.4369	0.137873	0.0709043
CEBPZOS	34.2027	11.8813	1.65248	2.8169
CECR5	48.1978	10.0924	2.49343	3.83912
CELF1	56.5805	41.605	0.539888	0.409444
CELF2	10.1604	241.534	-4.36197	-1.13701
CEMIP	1025.18	675.789	0.787818	0.239962
CEND1	1.48693	13.0827	-2.87668	-2.02859
CENPA	104.632	47.2884	1.30157	0.804951
CENPB	98.3339	128.708	-0.258133	-0.208527
CENPC	12.583	26.9781	-0.955991	-1.0224
CENPF	12.423	7.65008	0.946637	0.344494
CENPH	21.6883	3.39933	2.77498	2.93391
CENPM	17.3082	41.9329	-1.03891	-0.702335
CENPN	45.9582	9.51103	2.40766	2.78945
CENPO	16.8781	6.21837	1.56103	1.42858
CENPT	31.7226	12.232	1.44872	1.13317
CENPU	14.8973	2.84976	2.56443	1.92459
CENPV	28.7502	6.2421	2.40366	3.1919
CENPW	31.4514	12.2552	1.54236	1.13601
CEP104	12.2906	19.404	-0.425439	-0.237238
CEP112	12.8302	5.44902	1.23946	0.574423
CEP120	19.4732	23.0918	-0.201683	-0.0842107
CEP162	3.20098	10.7347	-1.81014	-1.08574
CEP164	14.232	18.8254	-0.359116	-0.18093
CEP170	82.7676	60.3196	0.575133	0.437896
CEP170B	22.4432	34.2534	-0.542593	-0.312876
CEP19	6.16713	11.9022	-0.992315	-0.594176
CEP192	10.3653	15.7478	-0.343551	-0.175546
CEP250	8.60194	20.6688	-1.03556	-0.771413
CEP295	17.3305	17.3281	-0.0060142	-0.00190031
CEP350	37.3383	30.8494	0.347517	0.20047
CEP41	23.4204	7.67634	1.78835	2.31282
CEP44	15.8829	20.0954	-0.191641	-0.0986267
CEP55	37.9181	12.3097	1.77907	0.822559
CEP57	36.0486	16.9924	1.2893	1.7595
CEP63	20.5176	18.7333	0.205807	0.110756
CEP68	23.1341	10.5951	1.25759	1.3923
CEP70	11.3566	2.4225	2.47889	2.29991
CEP78	14.2852	5.56268	1.45048	1.2813
CEP83	6.51272	29.3906	-2.17829	-3.00996
CEP85L	10.3555	1.11533	3.33004	2.71957
CEP89	24.9882	9.05415	1.66795	2.48471
CEP95	27.7099	11.0564	1.38708	0.917235
CEPT1	52.6943	60.7856	-0.110296	-0.0590821
CERCAM	245.69	81.969	1.7517	5.08817
CERK	12.6442	32.5285	-1.15198	-1.36973
CERS2	132.639	173.805	-0.245177	-0.233553
CERS4	10.4542	43.6754	-1.88009	-2.59851
CERS5	57.8365	98.0773	-0.644286	-0.785809
CERS6	35.4631	135.144	-1.72307	-1.86455
CETN2	71.8235	35.8683	1.16662	2.07109
CETN3	40.4821	75.0197	-0.778816	-1.00009
CFAP20	31.9769	60.7624	-0.668864	-0.528156
CFAP36	73.9339	69.1076	0.299562	0.20237
CFAP43	2.42502	35.4079	-4.75468	-4.09611
CFAP97	33.3019	15.9768	1.27187	1.85283
CFDP1	71.3387	151.894	-0.903754	-1.23611
CFI	109.973	22.5782	2.46802	4.10043
CFL1	2151.16	2788.79	-0.242468	-0.0946939
CFL2	140.234	326.26	-1.06681	-1.92179
CFLAR	42.6563	55.8909	-0.270538	-0.220783
CFP	2.28267	11.6847	-2.21003	-0.99381
CGGBP1	75.3818	112.944	-0.464148	-0.473608
CGNL1	11.1218	30.1622	-1.21961	-1.03405
CGRRF1	15.9618	53.7284	-1.47464	-1.83885
CH25H	7.12885	53.6777	-3.11967	-2.7661
CHAC2	5.70106	17.3582	-1.27314	-1.06132
CHAMP1	40.0025	30.4847	0.618642	0.536577
CHCHD1	106.018	70.0166	0.762862	0.722167
CHCHD10	148.401	169.268	-0.0292246	-0.00813719
CHCHD2	348.489	2.08517	7.54445	21.1152
CHCHD3	58.736	147.649	-1.14906	-0.630923
CHCHD5	51.0385	53.369	0.0702614	0.0370751
CHCHD6	15.7388	17.9064	0.0658603	0.0244265
CHCHD7	27.0145	89.9025	-1.49486	-2.18731
CHD1	4.91915	37.168	-3.34884	-2.74951
CHD1L	29.5518	5.2809	2.71266	4.38901
CHD2	231.636	65.4821	1.97714	5.29994
CHD3	76.9744	14.2934	2.57498	2.86753
CHD4	135.502	116.468	0.360105	0.232743
CHD6	45.2871	14.7455	1.73763	1.49012
CHD8	29.8323	6.25605	2.40011	3.86013
CHD9	60.5125	18.8609	1.80178	2.21807
CHEK1	18.2542	4.09717	2.27227	1.57237
CHEK2	17.3598	10.7606	0.796267	0.536577
CHERP	35.9933	70.5195	-0.803784	-1.08368
CHFR	26.2601	51.0738	-0.775098	-0.923078
CHIC1	14.7832	7.4155	1.0284	0.398252
CHIC2	94.3434	139.466	-0.381251	-0.29785
CHID1	49.2313	33.2856	0.758128	0.5127
CHKA	11.6272	59.3958	-2.30259	-4.67694
CHM	12.7647	33.5076	-1.05619	-0.772659
CHMP1A	59.7649	50.2503	0.453653	0.354639
CHMP2A	164.099	157.188	0.227972	0.249038
CHMP2B	63.9639	118.965	-0.711236	-1.04486
CHMP4B	183.958	191.621	0.0880893	0.0483987
CHMP5	108.852	125.073	-0.0188992	-0.0103809
CHMP6	20.5611	34.7715	-0.536933	-0.441102
CHMP7	26.1555	16.6799	0.851986	0.84765
CHN1	11.8006	18.215	-0.45589	-0.151182
CHORDC1	39.5717	89.3821	-1.07074	-1.74626
CHP1	219.124	192.346	0.342915	0.284909
CHPF	200.895	71.233	1.66781	2.6195
CHPF2	93.4325	110.74	-0.118733	-0.0749641
CHPT1	32.1788	48.3357	-0.408126	-0.235853
CHRAC1	45.5691	52.0504	-7.37651e-05	-7.24316e-05
CHRM2	0.0691183	13.6257	-5.477	-2.6014
CHRNB1	7.71522	21.4029	-1.33505	-1.16865
CHST1	26.0465	12.3758	1.15515	0.766023
CHST11	59.6244	12.3139	2.41962	1.6496
CHST12	15.5767	164.673	-3.05628	-6.98596
CHST14	26.3531	52.8909	-0.896131	-1.17137
CHST15	31.5877	22.029	0.668008	0.472578
CHST3	33.5254	0	8.56637	8.92344
CHST7	32.08	7.89415	2.16032	1.04448
CHSY1	138.217	101.347	0.630997	0.784168
CHSY3	13.6256	10.0396	0.466179	0.23138
CHTF8	101.033	141.376	-0.342332	-0.339147
CHTOP	91.1637	34.9762	1.50609	2.558
CHUK	19.6566	43.7653	-1.06654	-1.46713
CHURC1	81.2568	46.221	1.01655	1.25336
CIAO1	55.2867	53.7259	0.217224	0.166947
CIAPIN1	29.6348	22.3549	0.61473	0.37642
CIB1	85.2521	61.312	0.65271	0.573401
CIB2	9.7592	11.0605	-0.0463829	-0.0142616
CIC	28.3518	39.8379	-0.437068	-0.177022
CINP	35.7446	45.6115	-0.157289	-0.0851287
CIPC	13.5447	35.0482	-1.36923	-1.58779
CIR1	39.4572	10.3069	2.12375	4.95813
CIRBP	293.394	94.3473	1.80151	5.81514
CISD1	117.36	73.0506	0.824159	0.87013
CISD2	41.3509	105.411	-1.12825	-1.2847
CISH	10.3951	28.8616	-1.51315	-0.802352
CITED2	273.741	397.325	-0.368979	-0.301197
CITED4	16.2501	2.12453	3.25388	3.2287
CIZ1	95.5118	45.8242	1.19146	1.3722
CKAP2	44.4928	27.5719	0.862177	0.473608
CKAP2L	10.3001	29.9832	-1.31819	-0.624038
CKAP4	328.701	295.126	0.307696	0.207762
CKAP5	49.4359	36.5899	0.633831	0.690288
CKB	60.7263	95.2794	-0.473572	-0.278238
CKLF	36.4751	15.1868	1.49111	1.78275
CKM	0	23.5966	-6.94616	-3.51397
CKMT2	0.138237	28.8995	-6.12689	-3.20193
CKS2	115.828	91.2912	0.484647	0.218284
CLASP1	38.9358	29.6176	0.486812	0.36374
CLASP2	16.0448	44.0557	-1.34694	-2.19134
CLASRP	29.1236	30.912	-0.0438792	-0.0163244
CLCC1	33.101	18.2435	1.03931	1.11174
CLCF1	20.9896	6.62411	1.70784	1.20882
CLCN3	58.2788	25.0211	1.39623	2.78402
CLCN4	3.51499	54.0989	-3.43252	-6.86148
CLCN5	27.662	67.1686	-1.08489	-1.23981
CLCN6	6.78534	10.0106	-0.581274	-0.226329
CLCN7	30.2506	51.1534	-0.596047	-0.47584
CLDN11	982.263	16.361	6.09497	7.49434
CLDN12	24.544	51.2861	-0.808865	-0.711971
CLDN15	2.63237	65.5769	-5.3359	-7.93021
CLDND1	62.0719	55.7971	0.359517	0.221665
CLEC11A	132.505	0.542027	8.15085	13.8017
CLEC14A	28.1537	9.76063	1.67362	1.52644
CLEC16A	14.9171	24.0957	-0.4003	-0.196837
CLEC3B	22.4336	5.80616	2.13373	0.677889
CLEC4D	0	23.2909	-7.00118	-6.00164
CLHC1	12.5357	0.427814	4.71824	2.87883
CLIC1	385.918	710.894	-0.724252	-1.01333
CLIC3	18.8868	0	7.68365	5.136
CLIC4	871.912	310.918	1.65403	4.30646
CLIC5	0.0691183	11.2518	-5.19056	-2.13206
CLINT1	116.248	158.801	-0.3188	-0.226549
CLIP1	15.2984	28.1021	-0.676769	-0.575917
CLIP2	22.3481	70.2041	-1.60005	-1.91238
CLIP3	77.2227	89.9022	-0.0866716	-0.0337225
CLIP4	34.6315	0.420271	6.73633	6.47615
CLK1	43.6398	92.1773	-0.969101	-0.587836
CLK2	37.688	30.4071	0.38079	0.217049
CLK3	28.6181	22.4099	0.527281	0.371559
CLK4	18.4225	47.6784	-1.3918	-1.04486
CLMP	80.0524	26.1778	1.77018	2.07716
CLN6	28.977	41.2266	-0.264017	-0.113758
CLNS1A	135.875	85.4421	0.842985	0.913851
CLOCK	11.0349	37.4316	-1.7306	-2.68742
CLP1	11.6334	11.8112	0.116445	0.0437334
CLPB	27.4504	21.0055	0.521888	0.341303
CLPP	130.486	77.7909	0.923471	0.939248
CLPTM1	75.6544	145.281	-0.744042	-0.900985
CLPTM1L	26.4338	137.712	-2.10783	-4.7295
CLPX	20.4087	30.1032	-0.329932	-0.187546
CLSTN1	308.855	114.744	1.5808	4.9224
CLSTN3	11.8227	0	7.04672	5.24218
CLTA	511.441	776.379	-0.439352	-0.591585
CLTB	71.6934	149.503	-0.866402	-1.22104
CLTC	424.81	441.808	0.107331	0.0643069
CLUH	39.6052	21.3012	1.05518	1.56781
CLYBL	2.6699	14.1211	-2.108	-1.40289
CMAS	36.1516	38.8323	0.106209	0.059189
CMBL	45.271	44.6607	0.119707	0.0541971
CMC1	48.7029	66.0883	-0.339742	-0.245967
CMC2	44.3286	29.4383	0.815363	0.621761
CMC4	70.6218	15.1061	2.42064	5.35571
CMIP	66.2279	85.6177	-0.239759	-0.0924475
CMKLR1	0	34.0724	-7.54914	-7.11481
CMPK1	112.703	125.855	0.0238795	0.0136048
CMSS1	61.6887	10.7143	2.71888	6.94975
CMTM3	67.7979	219.625	-1.51131	-3.04605
CMTM6	69.1149	53.7868	0.542152	0.327837
CMTM7	95.7925	94.4608	0.205515	0.162319
CMTM8	26.9178	2.94135	3.31294	4.30502
CMTR1	53.0773	49.281	0.204984	0.101757
CMTR2	11.8207	4.30242	1.70602	1.16474
CNBP	295.991	347.188	-0.0745739	-0.0390898
CNDP2	73.3356	137.605	-0.752478	-0.884506
CNEP1R1	11.8307	26.3574	-0.808441	-0.47349
CNIH1	264.052	296.641	-0.0117406	-0.00930872
CNIH4	62.528	99.3383	-0.47904	-0.270917
CNN1	13.3298	16.2141	-0.0222489	-0.00403243
CNN2	617.998	490.441	0.4879	0.407359
CNN3	955.54	398.78	1.42982	1.71279
CNNM2	10.2944	9.6615	0.0732328	0.0206989
CNNM3	9.24378	11.4099	-0.109941	-0.0385728
CNOT1	97.8027	49.3894	1.13659	2.69039
CNOT10	26.3827	41.4969	-0.481657	-0.436258
CNOT11	43.8255	43.5333	0.180621	0.117094
CNOT2	69.8348	52.0236	0.602181	0.825001
CNOT3	32.1823	28.6241	0.28332	0.197537
CNOT4	23.0413	40.8471	-0.717747	-0.760318
CNOT6	43.7352	48.0018	-0.0412551	-0.0154227
CNOT6L	7.93849	10.6043	-0.46784	-0.204078
CNOT7	44.0607	72.3296	-0.49604	-0.316337
CNOT8	39.8149	35.9664	0.358493	0.253796
CNOT9	53.5964	48.4473	0.338051	0.167018
CNP	118.835	42.7628	1.61719	2.77867
CNPPD1	16.9115	88.112	-2.08029	-4.39579
CNPY3	42.1741	52.9915	-0.13137	-0.077181
CNPY4	44.1072	38.7879	0.317978	0.19548
CNRIP1	69.7767	64.9289	0.281146	0.204232
CNST	19.9685	15.2471	0.471736	0.302203
CNTLN	21.0351	7.33172	1.58798	0.897655
CNTNAP1	30.1843	0.420271	6.54625	6.19195
CNTRL	13.1577	14.2985	-0.151427	-0.0459603
CNTROB	15.1463	6.31219	1.32701	1.0668
COA3	60.7639	81.6694	-0.234466	-0.132662
COA4	91.0215	12.8695	2.99008	10.7379
COA5	55.1508	61.3631	-0.0465117	-0.0172141
COA6	48.0151	45.5006	0.259172	0.170292
COA7	21.1022	5.81374	1.89437	1.81839
COASY	67.0416	37.8661	1.01531	1.0015
COBLL1	3.34131	38.3093	-2.90258	-3.149
COG1	33.2551	43.3375	-0.305591	-0.167862
COG2	22.4825	13.5774	0.925722	0.9165
COG3	28.4029	23.2566	0.345197	0.196352
COG4	23.9615	51.17	-0.881634	-0.998141
COG5	42.2954	24.6651	0.941468	1.0901
COG6	53.5401	42.2275	0.463869	0.22052
COG7	19.8994	21.6106	-0.0210869	-0.00922357
COIL	15.5176	8.38172	1.04036	0.84363
COL11A1	6.18697	808.471	-6.51725	-17.356
COL12A1	437.038	141.328	1.81512	1.61534
COL13A1	13.6907	0.886901	3.94486	3.57404
COL14A1	5.64786	265.313	-5.50136	-10.2548
COL15A1	1.03678	23.2136	-3.59388	-2.81517
COL16A1	62.1238	122.439	-0.776344	-0.906238
COL18A1	226.352	53.5429	2.26233	3.10994
COL1A1	8157.37	6168.53	0.591713	0.429946
COL1A2	3830.83	2167.54	0.984401	0.615311
COL27A1	19.4022	4.03294	2.32116	1.4649
COL3A1	3140.58	4070.95	-0.209146	-0.100475
COL4A1	436.113	6439.67	-3.7184	-7.23253
COL4A2	346.365	2900.39	-2.89595	-8.1188
COL4A3BP	19.8026	41.1861	-0.904623	-1.06875
COL4A4	34.1719	7.25771	2.40848	1.447
COL4A5	13.0532	265.585	-4.46789	-14.6213
COL4A6	0.276473	45.2949	-6.07419	-5.98938
COL5A1	414.856	497.88	-0.0934386	-0.0423845
COL5A2	585.902	3284.45	-2.33368	-3.35237
COL5A3	17.6443	18.9905	0.122697	0.0405022
COL6A1	1172.57	1183.02	0.171954	0.0785252
COL6A2	1607.24	612.11	1.59399	1.31711
COL6A3	625.425	58.3636	3.61118	8.12616
COL6A5	0	16.9692	-6.46411	-3.24528
COL8A1	195.066	664.513	-1.61403	-0.906238
COL9A3	28.0031	0	8.32222	7.47407
COLEC11	11.343	9.5671	0.348482	0.098968
COLEC12	197.655	124.857	0.829212	0.702335
COLGALT1	154.753	265.45	-0.618152	-0.622289
COMMD10	32.7391	39.2518	-0.127266	-0.0739868
COMMD2	29.8779	20.9957	0.767027	0.515967
COMMD3	143.098	352.217	-1.15069	-2.23496
COMMD4	15.6851	35.3853	-0.883901	-0.498592
COMMD5	26.8585	50.7762	-0.866227	-0.97684
COMMD6	225.416	53.092	2.24081	2.28034
COMMD7	35.8513	52.1481	-0.307064	-0.218479
COMMD8	35.2607	78.119	-1.01781	-1.49942
COMMD9	96.9525	5.95699	4.17852	11.4743
COMT	104.787	292.085	-1.30634	-0.98876
COMTD1	17.6915	69.9221	-1.9274	-2.67509
COPA	188.611	210.281	0.0136414	0.00806197
COPB1	161.733	188.849	-0.0456161	-0.0261756
COPB2	176.334	160.323	0.295981	0.130055
COPE	278.193	185.494	0.741627	0.67454
COPG1	150.957	223.764	-0.400457	-0.301407
COPG2	43.5708	29.59	0.679898	0.648248
COPRS	59.9133	24.1435	1.43937	2.90816
COPS2	99.5008	99.2739	0.195952	0.122887
COPS3	53.4974	110.163	-0.839913	-0.668529
COPS4	91.8243	72.7832	0.507192	0.336489
COPS5	70.8625	206.349	-1.36345	-2.15684
COPS6	60.1425	63.5441	0.120502	0.0508084
COPS7A	70.9384	94.0607	-0.212783	-0.146622
COPS7B	28.614	23.1859	0.519124	0.432794
COPS8	82.1132	72.0387	0.370542	0.237799
COPS9	163.024	230.133	-0.327035	-0.336306
COPZ1	296.498	266.551	0.310959	0.196319
COPZ2	88.1884	217.34	-1.16299	-2.1108
COQ10B	49.8307	110.735	-1.00159	-1.30599
COQ2	46.2911	20.0443	1.41445	1.33025
COQ3	5.20542	23.3448	-1.84467	-1.85468
COQ4	131.394	21.5746	2.75528	4.3008
COQ5	62.2666	23.4797	1.55174	2.54265
COQ6	16.0445	18.3647	0.0189349	0.00813719
COQ7	17.4963	40.4699	-1.04929	-1.2577
COQ9	39.6268	67.2796	-0.561689	-0.546684
CORO1B	111.771	214.516	-0.784464	-0.975192
CORO1C	181.995	100.098	1.03232	1.43194
CORO2B	27.1354	8.02345	1.84123	0.902504
CORO6	23.6815	26.7667	-0.0445091	-0.00876899
COTL1	470.237	113.878	2.19773	4.46541
COX10	4.69796	15.1142	-1.3279	-0.830172
COX11	36.8114	7.79165	2.40727	4.23186
COX14	61.3609	116.833	-0.822229	-0.893402
COX15	25.0869	30.9616	-0.0556007	-0.0254886
COX16	147.801	60.4067	1.45009	1.30256
COX18	13.4042	71.9814	-2.12516	-2.7363
COX19	27.6007	41.6374	-0.514353	-0.379815
COX20	61.9662	114.668	-0.688817	-0.378468
COX4I1	438.135	717.049	-0.559146	-0.395165
COX5A	332.605	567.092	-0.621753	-0.523696
COX6A1	333.242	1781.67	-2.25455	-11.834
COX6A2	0	387.84	-10.8664	-3.11677
COX6B1	471.487	514.353	0.0272853	0.0154495
COX6B2	1.07222	18.6193	-3.99913	-1.66443
COX6C	360.24	494.937	-0.30237	-0.229237
COX7A1	47.2027	45.0877	0.226725	0.054261
COX7A2	152.152	191.787	-0.170333	-0.0817212
COX7A2L	118.685	19.924	2.75228	6.0994
COX7C	451.711	511.397	-0.0244083	-0.0104222
CP	0.138237	709.553	-10.7166	-25.2924
CPA4	29.1047	0	8.37639	2.08942
CPD	195.547	108.145	1.00736	2.14008
CPE	46.8643	644.262	-3.59643	-17.8772
CPEB2	30.6895	36.5986	-0.153643	-0.0706473
CPEB4	48.0009	14.3479	1.87153	1.27344
CPED1	12.0891	193.348	-3.95398	-9.4363
CPNE1	144.508	64.0451	1.33879	3.46378
CPNE2	13.3868	36.7092	-1.11176	-0.84765
CPNE3	49.7438	65.627	-0.173222	-0.091475
CPNE8	21.8879	55.8181	-1.17692	-1.48857
CPOX	38.3888	41.137	0.0865685	0.0483987
CPPED1	44.3195	54.4572	-0.178988	-0.0984614
CPQ	31.4778	149.889	-2.13663	-4.09644
CPSF1	41.1473	27.9745	0.698832	0.704364
CPSF2	43.2071	66.0719	-0.384358	-0.257017
CPSF3	41.0982	39.0706	0.274354	0.0984614
CPSF3L	105.663	40.0197	1.55131	2.9521
CPSF6	91.5397	60.6924	0.723889	0.903156
CPSF7	25.2174	31.9938	-0.112377	-0.0590821
CPT1A	35.1463	67.7825	-0.868321	-0.573401
CPT1C	11.4887	26.805	-1.00899	-0.625134
CPT2	34.8222	62.448	-0.670967	-0.671633
CPTP	40.3737	31.6397	0.531568	0.451017
CPXM1	103.111	12.0469	3.26095	3.39731
CPZ	11.4735	17.3059	-0.502688	-0.124739
CRABP2	58.5253	0.290421	7.60015	6.58157
CRADD	9.47476	18.1935	-0.806634	-0.613801
CRAMP1	11.6313	4.24042	1.45311	1.0167
CRAT	31.8347	76.0983	-1.06263	-1.682
CRBN	32.992	33.9142	0.119526	0.0739132
CRCP	27.0422	46.7	-0.723513	-0.724238
CREB1	71.2453	56.5217	0.455901	0.32473
CREB3	48.5507	155.459	-1.47386	-1.95378
CREB3L1	75.1629	169.946	-0.988242	-0.94992
CREB3L2	35.2606	139.203	-1.76046	-3.16908
CREBBP	30.8652	2.07986	3.93325	3.9488
CREBL2	62.2874	15.1954	2.19654	2.78611
CREBRF	13.6575	26.0789	-0.9514	-0.415539
CREBZF	18.8092	44.4254	-1.15426	-1.11101
CREG1	308.554	224.704	0.618286	0.421685
CRELD1	21.2163	104.276	-2.08916	-5.19398
CRELD2	26.5481	45.2456	-0.555992	-0.454629
CREM	30.7065	18.5763	0.923836	0.546684
CRIM1	163.895	99.1954	0.894042	0.351473
CRIP2	85.3171	625.285	-2.67171	-9.25633
CRIPT	71.8485	86.9643	-0.0783494	-0.039301
CRISPLD1	41.8946	1.13096	5.41814	6.10465
CRISPLD2	52.6216	186.34	-1.63461	-1.35344
CRK	94.7409	102.212	0.0175054	0.00838929
CRKL	53.0157	34.7606	0.815824	0.570023
CRLF1	14.092	118.622	-2.95593	-3.77519
CRLF2	0	10.5532	-5.86395	-4.04908
CRLF3	14.3821	14.8852	-0.0136234	-0.00536349
CRLS1	68.8785	56.9795	0.474901	0.377324
CRNKL1	33.9496	38.3805	-0.0278147	-0.015091
CROT	13.1105	38.5916	-1.6214	-1.76584
CRTAP	241.523	293.589	-0.117337	-0.0640256
CRTC2	38.7819	40.1987	0.0287928	0.0139906
CRTC3	19.8617	51.4374	-1.08811	-1.08404
CRY1	17.9804	16.2136	0.25498	0.0893677
CRY2	15.1246	23.8207	-0.703468	-0.401487
CRYAB	114.354	2437.04	-4.2532	-7.82127
CRYL1	17.0854	36.254	-0.893827	-0.878996
CRYZ	15.2845	15.8492	0.0370461	0.015091
CRYZL1	25.1028	32.9114	-0.172365	-0.102928
CSAD	17.765	0	7.57443	5.3677
CSDC2	18.0157	12.5294	0.603743	0.183833
CSDE1	572.992	384.256	0.731008	0.854579
CSE1L	51.9473	45.8792	0.392574	0.254368
CSF1	46.5332	671.917	-3.70277	-13.6503
CSF1R	1.06836	30.1029	-5.89135	-4.79717
CSGALNACT1	31.5388	11.1075	1.57975	0.986535
CSGALNACT2	17.672	33.9955	-0.739531	-0.5742
CSK	83.6644	106.495	-0.223555	-0.14968
CSN3	0	23.9554	-7.02815	-4.0479
CSNK1A1	126.123	432.059	-1.59145	-4.55191
CSNK1D	86.851	167.677	-0.800385	-1.52308
CSNK1E	40.395	24.0921	0.913327	0.97471
CSNK1G1	19.5343	27.8893	-0.46985	-0.297714
CSNK1G2	60.1344	133.873	-1.00376	-1.74908
CSNK1G3	60.4326	84.3263	-0.359412	-0.292528
CSNK2A2	123.644	64.5111	1.07914	1.77955
CSNK2B	306.404	260.005	0.383807	0.196319
CSPG4	18.9138	15.2624	0.43537	0.16393
CSPP1	11.4437	8.97875	0.289185	0.0961229
CSRNP2	18.2129	4.18821	2.19527	2.28672
CSRP1	557.037	939.25	-0.607807	-0.465697
CSRP2	18.316	100.623	-2.18041	-1.60327
CSRP3	0	10.1052	-5.69123	-2.15853
CST3	2118.26	3448.46	-0.53863	-0.336108
CST6	1.06836	64.5932	-7.02504	-6.54744
CSTB	584.714	582.685	0.159774	0.130055
CSTF1	26.2522	30.0513	0.044685	0.016332
CSTF2	22.6583	14.5537	0.836977	0.663134
CSTF2T	50.1601	44.557	0.308395	0.227448
CSTF3	30.9796	26.9505	0.354191	0.251758
[truncated: 7,679 more rows]

## Sheet: TableS2f
Differential gene expression analysis, mouse vs human, Common Myeloid Progenitor
[truncated: 9,276 more rows]

[truncated: 18 more sheets: TableS2g, TableS2h, TableS2i, TableS2j, TableS2k, TableS2l, TableS2m, TableS2n, TableS2o, TableS2p, TableS2q, TableS2r, TableS2s, TableS2t, TableS2u, TableS2v, TableS2w, TableS2x]
