# Supplementary material for: Comparative transcriptomics of primary cells in vertebrates
Source: Genome Res. 2020 Jul;30(7):951–61. doi: 10.1101/gr.255679.119 (PMC7397866; doi:10.1101/gr.255679.119)
Supplement: Supplemental Material [file supp_gr.255679.119_Supplemental_Table_S9.xlsx]

## Sheet: README
Sheets TableS9a, TableS9b, TableS9c contain the evaluation results of the miRBase high-confidence criteria (Kozomara and Griffiths-Jones 2014) for each pre-miRNA in the robust, permissive, and candidate novel set in rat, dog, and chicken.

## Sheet: TableS9a
Pre-miRNAs in rat
Name	Set	Sufficient tags?	5' end consistent?	3' end overhang?	Suffient basepairing nucleotides?	Suffient basepairing energy?
rno-let-7a-1	robust	yes	yes	yes	yes	yes
rno-let-7a-2	robust	yes	yes	yes	yes	yes
rno-let-7b	robust	yes	yes	yes	yes	yes
rno-let-7c-1	robust	yes	yes	yes	yes	yes
rno-let-7c-2	robust	yes	yes	yes	yes	yes
rno-let-7d	robust	yes	yes	yes	yes	yes
rno-let-7e	robust	yes	yes	yes	yes	yes
rno-let-7f-1	robust	yes	yes	yes	yes	yes
rno-let-7f-2	permissive	no	NA	NA	NA	yes
rno-let-7g	robust	yes	yes	yes	yes	yes
rno-let-7i	robust	yes	yes	yes	yes	yes
rno-mir-1	permissive	no	NA	NA	NA	yes
rno-mir-1b	robust	yes	yes	yes	yes	yes
rno-mir-7a-1	robust	yes	yes	yes	yes	yes
rno-mir-7a-2	robust	yes	yes	yes	yes	yes
rno-mir-7b	permissive	no	NA	NA	NA	yes
rno-mir-9a-1	robust	yes	yes	yes	yes	yes
rno-mir-9a-2	robust	yes	yes	yes	yes	yes
rno-mir-9a-3	robust	yes	yes	yes	yes	yes
rno-mir-9b-1	permissive	no	NA	NA	NA	yes
rno-mir-9b-2	permissive	no	NA	NA	NA	yes
rno-mir-9b-3	permissive	no	NA	NA	NA	yes
rno-mir-10a	robust	yes	yes	yes	yes	yes
rno-mir-10b	robust	yes	no	yes	yes	yes
rno-mir-15b	robust	yes	yes	yes	yes	yes
rno-mir-16	robust	yes	yes	yes	yes	yes
rno-mir-17-1	robust	yes	yes	no	yes	yes
rno-mir-17-2	robust	yes	yes	yes	yes	yes
rno-mir-18a	robust	yes	yes	yes	yes	yes
rno-mir-19a	robust	yes	yes	yes	yes	yes
rno-mir-19b-1	permissive	no	NA	NA	NA	yes
rno-mir-19b-2	permissive	no	NA	NA	NA	yes
rno-mir-20a	robust	yes	yes	yes	yes	yes
rno-mir-20b	robust	yes	yes	yes	yes	yes
rno-mir-21	robust	yes	yes	yes	yes	yes
rno-mir-22	robust	yes	yes	yes	yes	yes
rno-mir-23a	robust	yes	yes	yes	yes	yes
rno-mir-23b	robust	yes	yes	yes	yes	yes
rno-mir-24-1	robust	yes	yes	yes	yes	yes
rno-mir-24-2	robust	yes	yes	yes	yes	yes
rno-mir-25	robust	yes	yes	yes	yes	yes
rno-mir-26a	robust	yes	yes	yes	yes	yes
rno-mir-26b	robust	yes	yes	yes	yes	yes
rno-mir-27a	robust	yes	yes	yes	yes	yes
rno-mir-27b	robust	yes	yes	yes	yes	yes
rno-mir-28	robust	yes	yes	yes	yes	yes
rno-mir-29a	robust	yes	yes	yes	yes	yes
rno-mir-29b-1	robust	yes	yes	yes	yes	yes
rno-mir-29b-2	permissive	no	NA	NA	NA	yes
rno-mir-29b-3	permissive	no	NA	NA	NA	yes
rno-mir-29c-1	robust	yes	yes	yes	yes	yes
rno-mir-29c-2	robust	yes	yes	yes	yes	yes
rno-mir-30a	robust	yes	yes	yes	yes	yes
rno-mir-30c-1	robust	yes	yes	yes	yes	yes
rno-mir-30c-2	robust	yes	yes	yes	yes	yes
rno-mir-30d	robust	yes	yes	yes	yes	yes
rno-mir-30e	robust	yes	yes	yes	yes	yes
rno-mir-31a	robust	yes	yes	yes	yes	yes
rno-mir-31b	permissive	no	NA	NA	NA	yes
rno-mir-32	permissive	no	NA	NA	NA	yes
rno-mir-33	robust	yes	yes	yes	yes	yes
rno-mir-34a	robust	yes	yes	yes	yes	yes
rno-mir-34b	robust	yes	yes	yes	yes	yes
rno-mir-34c	robust	yes	yes	yes	yes	yes
rno-mir-92a-1	robust	yes	yes	yes	yes	yes
rno-mir-92a-2	permissive	no	NA	NA	NA	yes
rno-mir-92b	permissive	no	NA	NA	NA	yes
rno-mir-93	robust	yes	yes	yes	yes	yes
rno-mir-96	permissive	no	NA	NA	NA	yes
rno-mir-98	permissive	no	NA	NA	NA	yes
rno-mir-99a	robust	yes	yes	yes	yes	yes
rno-mir-99b	robust	yes	yes	yes	yes	yes
rno-mir-100	robust	yes	yes	yes	yes	yes
rno-mir-101a	robust	yes	no	yes	yes	yes
rno-mir-101b	permissive	no	NA	NA	NA	yes
rno-mir-103-1	permissive	no	NA	NA	NA	yes
rno-mir-103-2	permissive	no	NA	NA	NA	yes
rno-mir-105	permissive	no	NA	NA	NA	yes
rno-mir-106b	robust	yes	yes	yes	yes	yes
rno-mir-107	robust	yes	yes	yes	yes	yes
rno-mir-122	robust	yes	yes	yes	yes	yes
rno-mir-124-1	permissive	no	NA	NA	NA	yes
rno-mir-124-2	permissive	no	NA	NA	NA	yes
rno-mir-124-3	permissive	no	NA	NA	NA	yes
rno-mir-125a	robust	yes	yes	yes	yes	yes
rno-mir-125b-1	robust	yes	yes	yes	yes	yes
rno-mir-125b-2	robust	yes	yes	yes	yes	yes
rno-mir-126a	robust	yes	yes	yes	yes	yes
rno-mir-126b	permissive	no	NA	NA	NA	yes
rno-mir-127	robust	yes	yes	yes	yes	yes
rno-mir-128-1	robust	yes	yes	yes	yes	yes
rno-mir-128-2	permissive	no	NA	NA	NA	yes
rno-mir-129-1	robust	yes	yes	yes	yes	yes
rno-mir-129-2	robust	yes	yes	yes	yes	yes
rno-mir-130a	robust	yes	yes	yes	yes	yes
rno-mir-130b	robust	yes	yes	yes	yes	yes
rno-mir-132	robust	yes	yes	yes	yes	yes
rno-mir-133a	robust	yes	yes	yes	yes	yes
rno-mir-133b	permissive	no	NA	NA	NA	yes
rno-mir-133c	permissive	no	NA	NA	NA	yes
rno-mir-134	permissive	no	NA	NA	NA	yes
rno-mir-135a	permissive	no	NA	NA	NA	yes
rno-mir-135b	permissive	no	NA	NA	NA	yes
rno-mir-136	robust	yes	yes	yes	yes	yes
rno-mir-137	permissive	no	NA	NA	NA	yes
rno-mir-138-1	robust	yes	yes	yes	yes	yes
rno-mir-138-2	permissive	no	NA	NA	NA	yes
rno-mir-139	robust	yes	yes	yes	yes	yes
rno-mir-140	robust	yes	yes	no	yes	yes
rno-mir-141	robust	yes	yes	yes	yes	yes
rno-mir-142	robust	yes	yes	no	yes	yes
rno-mir-143	robust	yes	yes	yes	yes	yes
rno-mir-144	robust	yes	yes	yes	yes	yes
rno-mir-145	robust	yes	yes	yes	yes	yes
rno-mir-146a	robust	yes	yes	yes	yes	yes
rno-mir-146b	robust	yes	yes	yes	yes	yes
rno-mir-147	permissive	yes	no	no	yes	yes
rno-mir-148a	robust	yes	yes	yes	yes	yes
rno-mir-148b	robust	yes	yes	yes	yes	yes
rno-mir-149	permissive	no	NA	NA	NA	yes
rno-mir-150	robust	yes	yes	yes	yes	yes
rno-mir-151	robust	yes	yes	yes	yes	yes
rno-mir-152	robust	yes	yes	yes	yes	yes
rno-mir-153	permissive	no	NA	NA	NA	yes
rno-mir-154	permissive	no	NA	NA	NA	yes
rno-mir-155	robust	yes	yes	yes	yes	yes
rno-mir-181a-1	robust	yes	yes	yes	yes	yes
rno-mir-181a-2	robust	yes	yes	yes	yes	yes
rno-mir-181b-1	robust	yes	yes	yes	yes	yes
rno-mir-181b-2	permissive	no	NA	NA	NA	yes
rno-mir-181c	robust	yes	yes	yes	yes	yes
rno-mir-181d	permissive	no	NA	NA	NA	yes
rno-mir-182	permissive	no	NA	NA	NA	yes
rno-mir-183	robust	yes	yes	yes	yes	yes
rno-mir-184	permissive	no	NA	NA	NA	yes
rno-mir-185	robust	yes	yes	yes	yes	yes
rno-mir-186	robust	yes	yes	yes	yes	yes
rno-mir-187	permissive	no	NA	NA	NA	yes
rno-mir-188	permissive	no	NA	NA	NA	yes
rno-mir-190a-1	permissive	no	NA	NA	NA	yes
rno-mir-190a-2	permissive	no	NA	NA	NA	yes
rno-mir-190b	permissive	no	NA	NA	NA	yes
rno-mir-191a	robust	yes	yes	yes	yes	yes
rno-mir-191b	permissive	no	NA	NA	NA	yes
rno-mir-192	robust	yes	yes	yes	yes	yes
rno-mir-193a	robust	yes	yes	yes	yes	yes
rno-mir-193b	permissive	no	NA	NA	NA	yes
rno-mir-194-1	robust	yes	yes	yes	yes	yes
rno-mir-194-2	robust	yes	yes	yes	yes	yes
rno-mir-195	robust	yes	yes	yes	yes	yes
rno-mir-196a	permissive	no	NA	NA	NA	yes
rno-mir-196b-1	permissive	no	NA	NA	NA	yes
rno-mir-196b-2	permissive	no	NA	NA	NA	yes
rno-mir-196c	robust	yes	yes	yes	yes	yes
rno-mir-199a	robust	yes	yes	yes	yes	yes
rno-mir-200a	robust	yes	yes	yes	yes	yes
rno-mir-200b	robust	yes	yes	yes	yes	yes
rno-mir-200c	robust	yes	yes	yes	yes	yes
rno-mir-201	robust	yes	yes	yes	yes	yes
rno-mir-202	robust	yes	yes	yes	yes	yes
rno-mir-203a	robust	yes	yes	yes	yes	yes
rno-mir-203b	permissive	no	NA	NA	NA	yes
rno-mir-204	permissive	no	NA	NA	NA	yes
rno-mir-205	robust	yes	yes	yes	yes	yes
rno-mir-206	permissive	no	NA	NA	NA	yes
rno-mir-207	permissive	no	NA	NA	NA	yes
rno-mir-208a	permissive	no	NA	NA	NA	yes
rno-mir-208b	permissive	no	NA	NA	NA	yes
rno-mir-210	robust	yes	yes	yes	yes	yes
rno-mir-211	permissive	no	NA	NA	NA	yes
rno-mir-212	robust	yes	yes	yes	yes	yes
rno-mir-214	permissive	yes	no	no	yes	yes
rno-mir-215	novel	yes	yes	yes	yes	yes
rno-mir-216a	robust	yes	yes	no	yes	yes
rno-mir-216b	robust	yes	no	yes	yes	yes
rno-mir-217	robust	yes	yes	yes	yes	yes
rno-mir-218a-1	robust	yes	yes	no	yes	yes
rno-mir-218a-2	permissive	no	NA	NA	NA	yes
rno-mir-218b	permissive	no	NA	NA	NA	yes
rno-mir-219a-1	robust	yes	yes	yes	yes	yes
rno-mir-219a-2	robust	yes	yes	yes	yes	yes
rno-mir-219b	permissive	no	NA	NA	NA	yes
rno-mir-221	robust	yes	yes	no	yes	yes
rno-mir-222	robust	yes	yes	yes	yes	yes
rno-mir-223	robust	yes	yes	yes	yes	yes
rno-mir-224	permissive	no	NA	NA	NA	yes
rno-mir-290	permissive	no	NA	NA	NA	yes
rno-mir-291a	permissive	no	NA	NA	NA	yes
rno-mir-291b	permissive	no	NA	NA	NA	yes
rno-mir-292	permissive	no	NA	NA	NA	yes
rno-mir-293	permissive	no	NA	NA	NA	yes
rno-mir-294	permissive	no	NA	NA	NA	yes
rno-mir-295-1	permissive	no	NA	NA	NA	yes
rno-mir-295-2	permissive	no	NA	NA	NA	yes
rno-mir-296	permissive	no	NA	NA	NA	yes
rno-mir-297	permissive	no	NA	NA	NA	yes
rno-mir-298	robust	yes	yes	yes	yes	yes
rno-mir-299a	robust	yes	yes	yes	yes	yes
rno-mir-299b	permissive	no	NA	NA	NA	yes
rno-mir-300	permissive	no	NA	NA	NA	yes
rno-mir-301a	robust	yes	yes	yes	yes	yes
rno-mir-301b	permissive	no	NA	NA	NA	yes
rno-mir-320	permissive	no	NA	NA	NA	yes
rno-mir-322-1	robust	yes	yes	yes	yes	yes
rno-mir-322-2	robust	yes	yes	yes	yes	yes
rno-mir-323	permissive	no	NA	NA	NA	yes
rno-mir-324	robust	yes	yes	yes	yes	yes
rno-mir-325	robust	yes	yes	yes	yes	yes
rno-mir-326	permissive	no	NA	NA	NA	yes
rno-mir-327	permissive	no	NA	NA	NA	yes
rno-mir-328a	permissive	no	NA	NA	NA	yes
rno-mir-328b	permissive	no	NA	NA	NA	yes
rno-mir-329	robust	yes	yes	yes	yes	yes
rno-mir-330	robust	yes	yes	yes	yes	yes
rno-mir-331	permissive	yes	no	no	yes	yes
rno-mir-336	permissive	no	NA	NA	NA	yes
rno-mir-337	robust	yes	yes	yes	yes	yes
rno-mir-338	robust	yes	yes	yes	yes	yes
rno-mir-339	robust	yes	yes	no	yes	yes
rno-mir-340-1	robust	yes	yes	yes	yes	yes
rno-mir-340-2	robust	yes	yes	yes	yes	yes
rno-mir-341	permissive	no	NA	NA	NA	yes
rno-mir-342	robust	yes	yes	yes	yes	yes
rno-mir-343	permissive	no	NA	NA	NA	yes
rno-mir-344a-1	permissive	no	NA	NA	NA	yes
rno-mir-344a-2	permissive	no	NA	NA	NA	yes
rno-mir-344b-1	permissive	no	NA	NA	NA	yes
rno-mir-344b-2	permissive	no	NA	NA	NA	yes
rno-mir-344b-3	permissive	no	NA	NA	NA	yes
rno-mir-344g	permissive	no	NA	NA	NA	yes
rno-mir-344i	permissive	no	NA	NA	NA	yes
rno-mir-345	robust	yes	yes	yes	yes	yes
rno-mir-346	permissive	no	NA	NA	NA	yes
rno-mir-349	permissive	no	NA	NA	NA	yes
rno-mir-350-1	robust	yes	yes	yes	yes	yes
rno-mir-350-2	robust	yes	yes	yes	yes	yes
rno-mir-351-1	robust	yes	no	yes	yes	yes
rno-mir-351-2	robust	yes	no	yes	yes	yes
rno-mir-361	robust	yes	no	yes	yes	yes
rno-mir-362	robust	yes	yes	yes	yes	yes
rno-mir-363	permissive	no	NA	NA	NA	yes
rno-mir-365	robust	yes	yes	yes	yes	yes
rno-mir-369	robust	yes	yes	yes	yes	yes
rno-mir-370	permissive	no	NA	NA	NA	yes
rno-mir-374	robust	yes	yes	yes	yes	yes
rno-mir-375	permissive	no	NA	NA	NA	yes
rno-mir-376a	robust	yes	yes	yes	yes	yes
rno-mir-376b	permissive	no	NA	NA	NA	yes
rno-mir-376c	permissive	no	NA	NA	NA	yes
rno-mir-377	permissive	no	NA	NA	NA	yes
rno-mir-378a	robust	yes	yes	yes	yes	yes
rno-mir-378b	permissive	no	NA	NA	NA	yes
rno-mir-379	robust	yes	yes	yes	yes	yes
rno-mir-380	robust	yes	yes	yes	yes	yes
rno-mir-381	permissive	no	NA	NA	NA	yes
rno-mir-382	robust	yes	yes	yes	yes	yes
rno-mir-383	permissive	no	NA	NA	NA	yes
rno-mir-384	robust	yes	yes	yes	yes	yes
rno-mir-409a	robust	yes	yes	yes	yes	yes
rno-mir-409b	permissive	no	NA	NA	NA	yes
rno-mir-410	permissive	no	NA	NA	NA	yes
rno-mir-411	robust	yes	yes	yes	yes	yes
rno-mir-412	permissive	no	NA	NA	NA	yes
rno-mir-421	permissive	yes	no	no	yes	yes
rno-mir-423	robust	yes	yes	yes	yes	yes
rno-mir-425	robust	yes	yes	yes	yes	yes
rno-mir-429	permissive	no	NA	NA	NA	yes
rno-mir-431	permissive	yes	no	no	yes	yes
rno-mir-433	permissive	no	NA	NA	NA	yes
rno-mir-434-1	robust	yes	no	yes	yes	yes
rno-mir-434-2	robust	yes	no	yes	yes	yes
rno-mir-448	permissive	no	NA	NA	NA	yes
rno-mir-449a	permissive	no	NA	NA	NA	yes
rno-mir-449c	permissive	no	NA	NA	NA	yes
rno-mir-450a	permissive	no	NA	NA	NA	yes
rno-mir-450b-1	robust	yes	yes	yes	yes	yes
rno-mir-450b-2	robust	yes	yes	yes	yes	yes
rno-mir-451	robust	yes	yes	no	yes	yes
rno-mir-452	novel	no	NA	NA	NA	yes
rno-mir-455	robust	yes	yes	yes	yes	yes
rno-mir-463	robust	yes	yes	no	yes	yes
rno-mir-465	permissive	no	NA	NA	NA	yes
rno-mir-466b-1	permissive	no	NA	NA	NA	yes
rno-mir-466b-2	permissive	no	NA	NA	NA	yes
rno-mir-466b-3	permissive	no	NA	NA	NA	yes
rno-mir-466b-4	permissive	no	NA	NA	NA	yes
rno-mir-466c	permissive	no	NA	NA	NA	yes
rno-mir-471	robust	yes	yes	yes	yes	yes
rno-mir-483	permissive	no	NA	NA	NA	yes
rno-mir-484	permissive	no	NA	NA	NA	yes
rno-mir-485	robust	yes	yes	no	yes	yes
rno-mir-487b	permissive	no	NA	NA	NA	yes
rno-mir-488	permissive	no	NA	NA	NA	yes
rno-mir-489	permissive	no	NA	NA	NA	yes
rno-mir-490	permissive	no	NA	NA	NA	yes
rno-mir-493	permissive	no	NA	NA	NA	yes
rno-mir-494	permissive	no	NA	NA	NA	yes
rno-mir-495	permissive	no	NA	NA	NA	yes
rno-mir-496	permissive	no	NA	NA	NA	yes
rno-mir-497	robust	yes	no	yes	yes	yes
rno-mir-499	robust	yes	no	yes	yes	yes
rno-mir-500	permissive	no	NA	NA	NA	yes
rno-mir-501	robust	yes	yes	no	yes	yes
rno-mir-503-1	permissive	no	NA	NA	NA	yes
rno-mir-503-2	permissive	no	NA	NA	NA	yes
rno-mir-505	robust	yes	yes	yes	yes	yes
rno-mir-509	permissive	no	NA	NA	NA	yes
rno-mir-511	robust	yes	yes	yes	yes	yes
rno-mir-532	robust	yes	yes	yes	yes	yes
rno-mir-539	permissive	no	NA	NA	NA	yes
rno-mir-540	robust	yes	yes	no	yes	yes
rno-mir-541	permissive	no	NA	NA	NA	yes
rno-mir-542-1	robust	yes	yes	yes	yes	yes
rno-mir-542-2	robust	yes	yes	yes	yes	yes
rno-mir-542-3	robust	yes	yes	yes	yes	yes
rno-mir-543	permissive	no	NA	NA	NA	yes
rno-mir-544	permissive	no	NA	NA	NA	yes
rno-mir-547	robust	yes	yes	yes	yes	yes
rno-mir-551b	permissive	no	NA	NA	NA	yes
rno-mir-568	permissive	no	NA	NA	NA	yes
rno-mir-582	robust	yes	yes	yes	yes	yes
rno-mir-592	permissive	no	NA	NA	NA	yes
rno-mir-598-1	permissive	no	NA	NA	NA	yes
rno-mir-598-2	permissive	no	NA	NA	NA	yes
rno-mir-615	robust	yes	yes	yes	yes	yes
rno-mir-628	permissive	no	NA	NA	NA	yes
rno-mir-632	permissive	no	NA	NA	NA	yes
rno-mir-652	permissive	yes	no	no	yes	yes
rno-mir-653	permissive	no	NA	NA	NA	yes
rno-mir-664-1	permissive	no	NA	NA	NA	yes
rno-mir-664-2	robust	yes	yes	no	yes	yes
rno-mir-665	permissive	no	NA	NA	NA	yes
rno-mir-666	permissive	no	NA	NA	NA	yes
rno-mir-667	permissive	no	NA	NA	NA	yes
rno-mir-668	permissive	no	NA	NA	NA	yes
rno-mir-671	robust	yes	yes	yes	yes	yes
rno-mir-672	robust	yes	yes	yes	yes	yes
rno-mir-673	permissive	no	NA	NA	NA	yes
rno-mir-674	robust	yes	yes	yes	yes	yes
rno-mir-675	permissive	no	NA	NA	NA	yes
rno-mir-676	robust	yes	yes	yes	yes	yes
rno-mir-678	permissive	no	NA	NA	NA	yes
rno-mir-679	permissive	no	NA	NA	NA	yes
rno-mir-702	permissive	no	NA	NA	NA	yes
rno-mir-708	robust	yes	yes	no	yes	yes
rno-mir-711	permissive	no	NA	NA	NA	yes
rno-mir-741	permissive	no	NA	NA	NA	yes
rno-mir-742	permissive	no	NA	NA	NA	yes
rno-mir-743a	robust	yes	yes	yes	yes	yes
rno-mir-743b	robust	yes	yes	yes	yes	yes
rno-mir-744	novel	yes	yes	yes	yes	yes
rno-mir-758	permissive	no	NA	NA	NA	yes
rno-mir-759	permissive	no	NA	NA	NA	yes
rno-mir-760	permissive	no	NA	NA	NA	yes
rno-mir-761	permissive	no	NA	NA	NA	yes
rno-mir-762	permissive	no	NA	NA	NA	yes
rno-mir-764	permissive	no	NA	NA	NA	yes
rno-mir-770	permissive	no	NA	NA	NA	yes
rno-mir-802	robust	yes	yes	no	yes	yes
rno-mir-871	robust	yes	yes	yes	yes	yes
rno-mir-872	robust	yes	yes	yes	yes	yes
rno-mir-873	permissive	no	NA	NA	NA	yes
rno-mir-874	permissive	no	NA	NA	NA	yes
rno-mir-875	permissive	no	NA	NA	NA	yes
rno-mir-876	permissive	no	NA	NA	NA	yes
rno-mir-877	permissive	no	NA	NA	NA	yes
rno-mir-878	robust	yes	yes	yes	yes	yes
rno-mir-879	permissive	no	NA	NA	NA	yes
rno-mir-880	permissive	no	NA	NA	NA	yes
rno-mir-881	permissive	no	NA	NA	NA	yes
rno-mir-883	permissive	no	NA	NA	NA	yes
rno-mir-935	permissive	no	NA	NA	NA	yes
rno-mir-1188	permissive	no	NA	NA	NA	yes
rno-mir-1193	permissive	no	NA	NA	NA	yes
rno-mir-1199	permissive	no	NA	NA	NA	yes
rno-mir-1224	permissive	no	NA	NA	NA	yes
rno-mir-1247	robust	yes	yes	yes	yes	yes
rno-mir-1249	permissive	no	NA	NA	NA	yes
rno-mir-1297	permissive	no	NA	NA	NA	yes
rno-mir-1298	permissive	no	NA	NA	NA	yes
rno-mir-1306	permissive	no	NA	NA	NA	yes
rno-mir-1839	robust	yes	yes	yes	yes	yes
rno-mir-1843a	robust	yes	yes	yes	yes	yes
rno-mir-1843b	permissive	no	NA	NA	NA	yes
rno-mir-1896	permissive	no	NA	NA	NA	yes
rno-mir-1912	permissive	no	NA	NA	NA	yes
rno-mir-1949	permissive	no	NA	NA	NA	yes
rno-mir-1956	permissive	no	NA	NA	NA	yes
rno-mir-2985	permissive	no	NA	NA	NA	yes
rno-mir-3064	permissive	no	NA	NA	NA	yes
rno-mir-3065	permissive	no	NA	NA	NA	yes
rno-mir-3068	robust	yes	yes	yes	yes	yes
rno-mir-3072	permissive	no	NA	NA	NA	yes
rno-mir-3074	permissive	no	NA	NA	NA	yes
rno-mir-3075	permissive	no	NA	NA	NA	yes
rno-mir-3084a	permissive	no	NA	NA	NA	yes
rno-mir-3084b-1	permissive	no	NA	NA	NA	yes
rno-mir-3084b-2	permissive	no	NA	NA	NA	yes
rno-mir-3084c	permissive	no	NA	NA	NA	yes
rno-mir-3084d	permissive	no	NA	NA	NA	yes
rno-mir-3085	permissive	no	NA	NA	NA	yes
rno-mir-3099	permissive	no	NA	NA	NA	yes
rno-mir-3102	robust	yes	yes	yes	yes	yes
rno-mir-3120	permissive	no	NA	NA	NA	yes
rno-mir-3473	permissive	no	NA	NA	NA	yes
rno-mir-3541	permissive	no	NA	NA	NA	yes
rno-mir-3542-1	permissive	no	NA	NA	NA	yes
rno-mir-3542-2	permissive	no	NA	NA	NA	yes
rno-mir-3543-1	permissive	no	NA	NA	NA	yes
rno-mir-3543-2	permissive	no	NA	NA	NA	yes
rno-mir-3544	permissive	no	NA	NA	NA	yes
rno-mir-3546	permissive	no	NA	NA	NA	yes
rno-mir-3547	permissive	no	NA	NA	NA	yes
rno-mir-3548	permissive	no	NA	NA	NA	yes
rno-mir-3549	permissive	no	NA	NA	NA	yes
rno-mir-3550	permissive	no	NA	NA	NA	yes
rno-mir-3551	permissive	no	NA	NA	NA	yes
rno-mir-3552	permissive	no	NA	NA	NA	yes
rno-mir-3553	permissive	no	NA	NA	NA	yes
rno-mir-3556a	permissive	no	NA	NA	NA	yes
rno-mir-3556b-1	permissive	no	NA	NA	NA	yes
rno-mir-3556b-2	permissive	no	NA	NA	NA	yes
rno-mir-3557	permissive	no	NA	NA	NA	yes
rno-mir-3558	permissive	no	NA	NA	NA	yes
rno-mir-3559	robust	yes	yes	yes	yes	yes
rno-mir-3560	permissive	no	NA	NA	NA	yes
rno-mir-3561	permissive	no	NA	NA	NA	yes
rno-mir-3562	permissive	no	NA	NA	NA	yes
rno-mir-3564	permissive	no	NA	NA	NA	yes
rno-mir-3566	permissive	no	NA	NA	NA	yes
rno-mir-3568	permissive	no	NA	NA	NA	yes
rno-mir-3569	permissive	no	NA	NA	NA	yes
rno-mir-3570	permissive	no	NA	NA	NA	yes
rno-mir-3571	permissive	no	NA	NA	NA	yes
rno-mir-3572	permissive	no	NA	NA	NA	yes
rno-mir-3573	permissive	no	NA	NA	NA	yes
rno-mir-3574	permissive	no	NA	NA	NA	yes
rno-mir-3575	permissive	no	NA	NA	NA	yes
rno-mir-3576	permissive	no	NA	NA	NA	yes
rno-mir-3577	permissive	no	NA	NA	NA	yes
rno-mir-3578	permissive	no	NA	NA	NA	yes
rno-mir-3579	permissive	no	NA	NA	NA	yes
rno-mir-3580	permissive	no	NA	NA	NA	yes
rno-mir-3583	permissive	no	NA	NA	NA	yes
rno-mir-3584-1	permissive	no	NA	NA	NA	yes
rno-mir-3584-2	permissive	no	NA	NA	NA	yes
rno-mir-3585	robust	yes	yes	yes	yes	yes
rno-mir-3586	permissive	no	NA	NA	NA	yes
rno-mir-3587	permissive	no	NA	NA	NA	yes
rno-mir-3588	permissive	no	NA	NA	NA	yes
rno-mir-3589	permissive	no	NA	NA	NA	yes
rno-mir-3590	permissive	no	NA	NA	NA	yes
rno-mir-3591	permissive	no	NA	NA	NA	yes
rno-mir-3592	permissive	no	NA	NA	NA	yes
rno-mir-3593	permissive	no	NA	NA	NA	yes
rno-mir-3594	permissive	no	NA	NA	NA	yes
rno-mir-3595	permissive	no	NA	NA	NA	yes
rno-mir-3596a	permissive	no	NA	NA	NA	yes
rno-mir-3596b	permissive	no	NA	NA	NA	yes
rno-mir-3596c	permissive	no	NA	NA	NA	yes
rno-mir-3596d	permissive	no	NA	NA	NA	yes
rno-mir-5132	permissive	no	NA	NA	NA	yes
rno-mir-6215	permissive	no	NA	NA	NA	yes
rno-mir-6216	permissive	no	NA	NA	NA	yes
rno-mir-6314	permissive	no	NA	NA	NA	yes
rno-mir-6315	permissive	no	NA	NA	NA	yes
rno-mir-6316	permissive	no	NA	NA	NA	yes
rno-mir-6317-1	permissive	no	NA	NA	NA	yes
rno-mir-6317-2	permissive	no	NA	NA	NA	yes
rno-mir-6318	permissive	no	NA	NA	NA	yes
rno-mir-6319-1	permissive	no	NA	NA	NA	yes
rno-mir-6319-2	permissive	no	NA	NA	NA	yes
rno-mir-6320	permissive	no	NA	NA	NA	yes
rno-mir-6321	permissive	no	NA	NA	NA	yes
rno-mir-6322	permissive	no	NA	NA	NA	yes
rno-mir-6323	permissive	no	NA	NA	NA	yes
rno-mir-6324	robust	yes	yes	yes	yes	yes
rno-mir-6325	permissive	no	NA	NA	NA	yes
rno-mir-6326	permissive	no	NA	NA	NA	yes
rno-mir-6327	permissive	no	NA	NA	NA	yes
rno-mir-6328	permissive	no	NA	NA	NA	yes
rno-mir-6329	robust	yes	yes	yes	yes	yes
rno-mir-6330	permissive	no	NA	NA	NA	yes
rno-mir-6331	robust	yes	yes	yes	yes	yes
rno-mir-6332	permissive	no	NA	NA	NA	yes
rno-mir-6333	permissive	no	NA	NA	NA	yes
rno-mir-6334	permissive	no	NA	NA	NA	yes
rno-mir-7578	permissive	no	NA	NA	NA	yes
rno-novelmir-1	novel	no	NA	NA	NA	yes
rno-novelmir-2	novel	no	NA	NA	NA	yes
rno-novelmir-3	novel	no	NA	NA	NA	yes
rno-novelmir-4	novel	no	NA	NA	NA	yes
rno-novelmir-6	novel	no	NA	NA	NA	yes
rno-novelmir-7	novel	yes	no	no	no	no
rno-novelmir-8	novel	no	NA	NA	NA	yes
rno-novelmir-9	novel	no	NA	NA	NA	yes
rno-novelmir-10	novel	no	NA	NA	NA	yes
rno-novelmir-11	novel	no	NA	NA	NA	yes
rno-novelmir-12	novel	no	NA	NA	NA	yes
rno-novelmir-13	novel	no	NA	NA	NA	yes
rno-novelmir-14	novel	no	NA	NA	NA	yes
rno-novelmir-15	novel	no	NA	NA	NA	yes
rno-novelmir-16	novel	no	NA	NA	NA	yes
rno-novelmir-18	novel	no	NA	NA	NA	yes
rno-novelmir-19	novel	no	NA	NA	NA	yes
rno-novelmir-20	novel	no	NA	NA	NA	yes
rno-novelmir-21	novel	no	NA	NA	NA	yes
rno-novelmir-22	novel	no	NA	NA	NA	yes
rno-novelmir-23	novel	no	NA	NA	NA	yes
rno-novelmir-24	novel	no	NA	NA	NA	yes
rno-novelmir-25	novel	no	NA	NA	NA	yes
rno-novelmir-26	novel	no	NA	NA	NA	yes
rno-novelmir-27	novel	no	NA	NA	NA	yes
rno-novelmir-28	novel	no	NA	NA	NA	yes
rno-novelmir-29	novel	no	NA	NA	NA	yes
rno-novelmir-30	novel	no	NA	NA	NA	yes
rno-novelmir-31	novel	no	NA	NA	NA	yes
rno-novelmir-32	novel	no	NA	NA	NA	yes
rno-novelmir-33	novel	no	NA	NA	NA	yes
rno-novelmir-34	novel	no	NA	NA	NA	yes
rno-novelmir-35	novel	no	NA	NA	NA	yes
rno-novelmir-36	novel	no	NA	NA	NA	yes
rno-novelmir-37	novel	no	NA	NA	NA	yes
rno-novelmir-38	novel	no	NA	NA	NA	yes
rno-novelmir-39	novel	no	NA	NA	NA	yes
rno-novelmir-40	novel	no	NA	NA	NA	yes
rno-novelmir-41	novel	no	NA	NA	NA	yes
rno-novelmir-42	novel	no	NA	NA	NA	yes
rno-novelmir-43	novel	no	NA	NA	NA	yes
rno-novelmir-44	novel	no	NA	NA	NA	yes
rno-novelmir-45	novel	no	NA	NA	NA	yes
rno-novelmir-46	novel	no	NA	NA	NA	yes
rno-novelmir-47	novel	no	NA	NA	NA	yes
rno-novelmir-48	novel	no	NA	NA	NA	yes
rno-novelmir-49	novel	no	NA	NA	NA	yes
rno-novelmir-50	novel	no	NA	NA	NA	yes
rno-novelmir-51	novel	no	NA	NA	NA	yes
rno-novelmir-52	novel	no	NA	NA	NA	yes
rno-novelmir-53	novel	no	NA	NA	NA	yes
rno-novelmir-54	novel	no	NA	NA	NA	yes
rno-novelmir-55	novel	no	NA	NA	NA	yes
rno-novelmir-56	novel	no	NA	NA	NA	yes
rno-novelmir-57	novel	no	NA	NA	NA	yes
rno-novelmir-58	novel	yes	yes	yes	yes	yes
rno-novelmir-60	novel	no	NA	NA	NA	yes

## Sheet: TableS9b
Pre-miRNAs in dog
Name	Set	Sufficient tags?	5' end consistent?	3' end overhang?	Suffient basepairing nucleotides?	Suffient basepairing energy?
cfa-let-7a-1	robust	yes	yes	yes	yes	yes
cfa-let-7a-2	robust	yes	yes	yes	yes	yes
cfa-let-7b	permissive	yes	no	no	no	yes
cfa-let-7c	robust	yes	yes	yes	yes	yes
cfa-let-7d	robust	yes	yes	yes	yes	yes
cfa-let-7e	robust	yes	yes	yes	yes	yes
cfa-let-7f	robust	yes	no	yes	yes	yes
cfa-let-7g	permissive	no	NA	NA	NA	yes
cfa-let-7j	permissive	no	NA	NA	NA	yes
cfa-mir-1-1	robust	yes	yes	yes	yes	yes
cfa-mir-1-2	permissive	no	NA	NA	NA	yes
cfa-mir-7-1	robust	yes	yes	yes	yes	yes
cfa-mir-7-2	permissive	no	NA	NA	NA	yes
cfa-mir-7-3	robust	yes	yes	yes	yes	yes
cfa-mir-9-1	robust	yes	yes	yes	yes	yes
cfa-mir-9-2	robust	yes	yes	yes	yes	yes
cfa-mir-9-3	robust	yes	yes	yes	yes	yes
cfa-mir-10a	robust	yes	yes	yes	yes	yes
cfa-mir-10b	robust	yes	no	yes	yes	yes
cfa-mir-15a	permissive	no	NA	NA	NA	yes
cfa-mir-15b	robust	yes	yes	yes	yes	yes
cfa-mir-16-1	permissive	no	NA	NA	NA	yes
cfa-mir-16-2	robust	yes	yes	yes	yes	yes
cfa-mir-17	robust	yes	yes	yes	yes	yes
cfa-mir-18a	robust	yes	yes	yes	yes	yes
cfa-mir-18b	permissive	no	NA	NA	NA	yes
cfa-mir-19a	permissive	yes	no	no	yes	yes
cfa-mir-19b-1	permissive	no	NA	NA	NA	yes
cfa-mir-19b-2	permissive	no	NA	NA	NA	yes
cfa-mir-20a	robust	yes	yes	yes	yes	yes
cfa-mir-20b	permissive	no	NA	NA	NA	yes
cfa-mir-21	robust	yes	yes	yes	yes	yes
cfa-mir-22	robust	yes	yes	yes	yes	yes
cfa-mir-23a	robust	yes	yes	yes	yes	yes
cfa-mir-23b	robust	yes	yes	yes	yes	yes
cfa-mir-24-1	robust	yes	yes	yes	yes	yes
cfa-mir-24-2	robust	yes	yes	yes	yes	yes
cfa-mir-25	robust	yes	yes	yes	yes	yes
cfa-mir-26a-1	robust	yes	yes	yes	yes	yes
cfa-mir-26a-2	robust	yes	yes	yes	yes	yes
cfa-mir-26b	robust	yes	yes	yes	yes	yes
cfa-mir-27a	robust	yes	yes	yes	yes	yes
cfa-mir-27b	robust	yes	yes	yes	yes	yes
cfa-mir-28	robust	yes	yes	yes	yes	yes
cfa-mir-29a	robust	yes	yes	yes	yes	yes
cfa-mir-29b-1	robust	yes	yes	yes	yes	yes
cfa-mir-29b-2	robust	yes	yes	yes	yes	yes
cfa-mir-29c-1	robust	yes	yes	no	yes	yes
cfa-mir-29c-2	robust	yes	yes	no	yes	yes
cfa-mir-30a	robust	yes	yes	yes	yes	yes
cfa-mir-30b	robust	yes	yes	yes	yes	yes
cfa-mir-30c-1	robust	yes	yes	yes	yes	yes
cfa-mir-30c-2	robust	yes	yes	yes	yes	yes
cfa-mir-30d	robust	yes	yes	yes	yes	yes
cfa-mir-30e	robust	yes	yes	yes	yes	yes
cfa-mir-31	robust	yes	yes	yes	yes	yes
cfa-mir-32	robust	yes	yes	yes	yes	yes
cfa-mir-33a	robust	yes	yes	yes	yes	yes
cfa-mir-33b	robust	yes	yes	yes	yes	yes
cfa-mir-34a	robust	yes	yes	yes	yes	yes
cfa-mir-34b	robust	yes	yes	yes	yes	yes
cfa-mir-34c	robust	yes	yes	yes	yes	yes
cfa-mir-92a-1	robust	yes	yes	yes	yes	yes
cfa-mir-92a-2	permissive	no	NA	NA	NA	yes
cfa-mir-92b	permissive	no	NA	NA	NA	yes
cfa-mir-93	robust	yes	yes	yes	yes	yes
cfa-mir-95	permissive	no	NA	NA	NA	yes
cfa-mir-96	permissive	no	NA	NA	NA	yes
cfa-mir-98	permissive	no	NA	NA	NA	yes
cfa-mir-99a-1	robust	yes	yes	yes	yes	yes
cfa-mir-99a-2	robust	yes	yes	yes	yes	yes
cfa-mir-99b	robust	yes	yes	yes	yes	yes
cfa-mir-101-1	robust	yes	yes	yes	yes	yes
cfa-mir-101-2	permissive	no	NA	NA	NA	yes
cfa-mir-103-1	permissive	no	NA	NA	NA	yes
cfa-mir-103-2	permissive	no	NA	NA	NA	yes
cfa-mir-105a	robust	yes	no	yes	yes	yes
cfa-mir-105b	permissive	no	NA	NA	NA	yes
cfa-mir-106a	permissive	no	NA	NA	NA	yes
cfa-mir-106b	robust	yes	yes	yes	yes	yes
cfa-mir-107	robust	yes	yes	yes	yes	yes
cfa-mir-122	robust	yes	yes	yes	yes	yes
cfa-mir-124-1	permissive	no	NA	NA	NA	yes
cfa-mir-124-2	permissive	no	NA	NA	NA	yes
cfa-mir-124-3	permissive	no	NA	NA	NA	yes
cfa-mir-125a	robust	yes	yes	yes	yes	yes
cfa-mir-125b-1	robust	yes	yes	yes	yes	yes
cfa-mir-125b-2	robust	yes	yes	yes	yes	yes
cfa-mir-126	robust	yes	yes	yes	yes	yes
cfa-mir-127	robust	yes	yes	yes	yes	yes
cfa-mir-128-1	robust	yes	yes	yes	yes	yes
cfa-mir-128-2	robust	yes	yes	yes	yes	yes
cfa-mir-129-1	robust	yes	yes	yes	yes	yes
cfa-mir-129-2	robust	yes	yes	yes	yes	yes
cfa-mir-130a	robust	yes	yes	yes	yes	yes
cfa-mir-130b	robust	yes	yes	yes	yes	yes
cfa-mir-132	robust	yes	yes	yes	yes	yes
cfa-mir-133a	robust	yes	yes	yes	yes	yes
cfa-mir-133c	robust	yes	yes	yes	yes	yes
cfa-mir-134	permissive	no	NA	NA	NA	yes
cfa-mir-135a-1	permissive	no	NA	NA	NA	yes
cfa-mir-135a-2	permissive	no	NA	NA	NA	yes
cfa-mir-135b	permissive	no	NA	NA	NA	yes
cfa-mir-136	robust	yes	yes	yes	yes	yes
cfa-mir-137	permissive	no	NA	NA	NA	yes
cfa-mir-138a	robust	yes	yes	yes	yes	yes
cfa-mir-138b	permissive	no	NA	NA	NA	yes
cfa-mir-139	robust	yes	yes	yes	yes	yes
cfa-mir-140	robust	yes	yes	no	yes	yes
cfa-mir-141	robust	yes	yes	yes	yes	yes
cfa-mir-142	robust	yes	yes	no	yes	yes
cfa-mir-143	robust	yes	yes	yes	yes	yes
cfa-mir-144	robust	yes	yes	yes	yes	yes
cfa-mir-145	robust	yes	yes	yes	yes	yes
cfa-mir-146a	robust	yes	yes	yes	yes	yes
cfa-mir-146b	permissive	no	NA	NA	NA	yes
cfa-mir-147	permissive	no	NA	NA	NA	yes
cfa-mir-148a	robust	yes	yes	yes	yes	yes
cfa-mir-148b	robust	yes	yes	yes	yes	yes
cfa-mir-149	permissive	no	NA	NA	NA	yes
cfa-mir-150	permissive	no	NA	NA	NA	yes
cfa-mir-151	robust	yes	yes	yes	yes	yes
cfa-mir-152	robust	yes	yes	yes	yes	yes
cfa-mir-153	robust	yes	yes	yes	yes	yes
cfa-mir-155	permissive	no	NA	NA	NA	yes
cfa-mir-181a-1	robust	yes	yes	yes	yes	yes
cfa-mir-181a-2	robust	yes	yes	yes	yes	yes
cfa-mir-181b-1	permissive	no	NA	NA	NA	yes
cfa-mir-181b-2	robust	yes	no	yes	yes	yes
cfa-mir-181c	robust	yes	yes	yes	yes	yes
cfa-mir-181d	permissive	no	NA	NA	NA	yes
cfa-mir-182	permissive	no	NA	NA	NA	yes
cfa-mir-183	robust	yes	yes	yes	yes	yes
cfa-mir-184	permissive	no	NA	NA	NA	yes
cfa-mir-185	robust	yes	yes	yes	yes	yes
cfa-mir-186	robust	yes	yes	yes	yes	yes
cfa-mir-187	permissive	no	NA	NA	NA	yes
cfa-mir-188	robust	yes	yes	yes	yes	yes
cfa-mir-190a	robust	yes	yes	yes	yes	yes
cfa-mir-190b	permissive	no	NA	NA	NA	yes
cfa-mir-191	robust	yes	yes	yes	yes	yes
cfa-mir-192	robust	yes	yes	yes	yes	yes
cfa-mir-193a	robust	yes	yes	yes	yes	yes
cfa-mir-193b	robust	yes	yes	yes	yes	yes
cfa-mir-194	robust	yes	no	yes	yes	yes
cfa-mir-194-2	novel	yes	no	yes	yes	yes
cfa-mir-195	robust	yes	yes	yes	yes	yes
cfa-mir-196a-1	permissive	no	NA	NA	NA	yes
cfa-mir-196a-2	permissive	no	NA	NA	NA	yes
cfa-mir-196b	robust	yes	yes	yes	yes	yes
cfa-mir-197	permissive	no	NA	NA	NA	yes
cfa-mir-199-1	robust	yes	yes	yes	yes	yes
cfa-mir-199-2	robust	yes	yes	yes	yes	yes
cfa-mir-199-3	robust	yes	yes	yes	yes	yes
cfa-mir-200a	robust	yes	yes	yes	yes	yes
cfa-mir-200b	robust	yes	yes	yes	yes	yes
cfa-mir-200c	robust	yes	yes	yes	yes	yes
cfa-mir-202	robust	yes	yes	yes	yes	yes
cfa-mir-203	robust	yes	yes	yes	yes	yes
cfa-mir-204	robust	yes	yes	yes	yes	yes
cfa-mir-205	permissive	no	NA	NA	NA	yes
cfa-mir-206	permissive	no	NA	NA	NA	yes
cfa-mir-207	permissive	no	NA	NA	NA	yes
cfa-mir-208a	permissive	no	NA	NA	NA	yes
cfa-mir-208b	permissive	no	NA	NA	NA	yes
cfa-mir-210	robust	yes	yes	yes	yes	yes
cfa-mir-211	permissive	no	NA	NA	NA	yes
cfa-mir-212	robust	yes	yes	yes	yes	yes
cfa-mir-214	robust	yes	yes	yes	yes	yes
cfa-mir-215	robust	yes	yes	yes	yes	yes
cfa-mir-216a	robust	yes	yes	no	yes	yes
cfa-mir-216b	robust	yes	yes	yes	yes	yes
cfa-mir-217	robust	yes	yes	yes	yes	yes
cfa-mir-218-1	robust	yes	yes	no	yes	yes
cfa-mir-218-2	permissive	no	NA	NA	NA	yes
cfa-mir-219-1	robust	yes	yes	yes	yes	yes
cfa-mir-219-2	robust	yes	yes	yes	yes	yes
cfa-mir-221	robust	yes	yes	no	yes	yes
cfa-mir-222	robust	yes	yes	yes	yes	yes
cfa-mir-223	robust	yes	yes	no	yes	yes
cfa-mir-224	robust	yes	yes	yes	yes	yes
cfa-mir-299	robust	yes	yes	yes	yes	yes
cfa-mir-300	permissive	no	NA	NA	NA	yes
cfa-mir-301a	robust	yes	yes	yes	yes	yes
cfa-mir-301b	permissive	no	NA	NA	NA	yes
cfa-mir-302a	permissive	no	NA	NA	NA	yes
cfa-mir-302b	permissive	no	NA	NA	NA	yes
cfa-mir-302c	permissive	no	NA	NA	NA	yes
cfa-mir-302d	permissive	no	NA	NA	NA	yes
cfa-mir-320	permissive	no	NA	NA	NA	yes
cfa-mir-323	permissive	no	NA	NA	NA	yes
cfa-mir-324	robust	yes	yes	no	yes	yes
cfa-mir-325	permissive	no	NA	NA	NA	yes
cfa-mir-326	permissive	no	NA	NA	NA	yes
cfa-mir-328	permissive	no	NA	NA	NA	yes
cfa-mir-329a	permissive	no	NA	NA	NA	yes
cfa-mir-329b	permissive	no	NA	NA	NA	yes
cfa-mir-330	robust	yes	yes	yes	yes	yes
cfa-mir-331	robust	yes	yes	yes	yes	yes
cfa-mir-335	robust	yes	yes	yes	yes	yes
cfa-mir-338	robust	yes	yes	yes	yes	yes
cfa-mir-339-1	robust	yes	yes	no	yes	yes
cfa-mir-340	robust	yes	yes	yes	yes	yes
cfa-mir-342	robust	yes	yes	yes	no	yes
cfa-mir-345	permissive	no	NA	NA	NA	yes
cfa-mir-346	permissive	no	NA	NA	NA	yes
cfa-mir-350	robust	yes	yes	yes	yes	yes
cfa-mir-361	robust	yes	yes	no	yes	yes
cfa-mir-362	robust	yes	yes	yes	yes	yes
cfa-mir-363	permissive	no	NA	NA	NA	yes
cfa-mir-365-1	robust	yes	yes	yes	yes	yes
cfa-mir-365-2	robust	yes	no	yes	yes	yes
cfa-mir-367	permissive	no	NA	NA	NA	yes
cfa-mir-369	permissive	no	NA	NA	NA	yes
cfa-mir-370	permissive	no	NA	NA	NA	yes
cfa-mir-371	permissive	no	NA	NA	NA	yes
cfa-mir-371	permissive	no	NA	NA	NA	yes
cfa-mir-374a	robust	yes	yes	yes	yes	yes
cfa-mir-374b	robust	yes	yes	yes	yes	yes
cfa-mir-375	permissive	no	NA	NA	NA	yes
cfa-mir-376a-1	permissive	no	NA	NA	NA	yes
cfa-mir-376a-2	permissive	no	NA	NA	NA	yes
cfa-mir-376a-3	permissive	no	NA	NA	NA	yes
cfa-mir-376b	permissive	no	NA	NA	NA	yes
cfa-mir-376c	permissive	no	NA	NA	NA	yes
cfa-mir-377	permissive	no	NA	NA	NA	yes
cfa-mir-378	robust	yes	yes	yes	yes	yes
cfa-mir-379	robust	yes	yes	yes	yes	yes
cfa-mir-380	permissive	no	NA	NA	NA	yes
cfa-mir-381	permissive	no	NA	NA	NA	yes
cfa-mir-382	robust	yes	yes	yes	yes	yes
cfa-mir-383	permissive	no	NA	NA	NA	yes
cfa-mir-384	permissive	no	NA	NA	NA	yes
cfa-mir-409	permissive	no	NA	NA	NA	yes
cfa-mir-410	permissive	no	NA	NA	NA	yes
cfa-mir-411	robust	yes	yes	yes	yes	yes
cfa-mir-421	robust	yes	yes	yes	yes	yes
cfa-mir-423a	robust	yes	yes	yes	yes	yes
cfa-mir-424	robust	yes	yes	yes	yes	yes
cfa-mir-425	robust	yes	yes	yes	yes	yes
cfa-mir-429	permissive	no	NA	NA	NA	yes
cfa-mir-432	permissive	no	NA	NA	NA	yes
cfa-mir-433	permissive	no	NA	NA	NA	yes
cfa-mir-448	permissive	no	NA	NA	NA	yes
cfa-mir-449a	robust	yes	yes	yes	yes	yes
cfa-mir-449b	permissive	no	NA	NA	NA	yes
cfa-mir-450a	permissive	no	NA	NA	NA	yes
cfa-mir-450b	permissive	no	NA	NA	NA	yes
cfa-mir-451	permissive	no	NA	NA	NA	yes
cfa-mir-452	robust	yes	yes	yes	yes	yes
cfa-mir-454	robust	yes	yes	yes	yes	yes
cfa-mir-455	robust	yes	yes	yes	yes	yes
cfa-mir-483	robust	yes	yes	no	yes	yes
cfa-mir-485	robust	yes	yes	yes	yes	yes
cfa-mir-486	robust	yes	yes	yes	yes	yes
cfa-mir-487a	robust	yes	yes	yes	yes	yes
cfa-mir-487b	permissive	no	NA	NA	NA	yes
cfa-mir-488	robust	yes	yes	yes	yes	yes
cfa-mir-489	permissive	no	NA	NA	NA	yes
cfa-mir-490	robust	yes	yes	yes	yes	yes
cfa-mir-491	robust	yes	yes	yes	yes	yes
cfa-mir-493	robust	yes	yes	yes	yes	yes
cfa-mir-494	permissive	no	NA	NA	NA	yes
cfa-mir-495	permissive	no	NA	NA	NA	yes
cfa-mir-496	permissive	no	NA	NA	NA	yes
cfa-mir-497	robust	yes	yes	yes	yes	yes
cfa-mir-499	robust	yes	yes	yes	yes	yes
cfa-mir-500	robust	yes	yes	yes	yes	yes
cfa-mir-500b	novel	no	NA	NA	NA	yes
cfa-mir-502	robust	yes	yes	yes	yes	yes
cfa-mir-503	permissive	no	NA	NA	NA	yes
cfa-mir-504	permissive	no	NA	NA	NA	yes
cfa-mir-505	robust	yes	yes	yes	yes	yes
cfa-mir-506	robust	yes	yes	yes	yes	yes
cfa-mir-507a	permissive	no	NA	NA	NA	yes
cfa-mir-507b	permissive	no	NA	NA	NA	yes
cfa-mir-508a	robust	yes	yes	yes	yes	yes
cfa-mir-508b	permissive	no	NA	NA	NA	yes
cfa-mir-514	permissive	no	NA	NA	NA	yes
cfa-mir-532	robust	yes	yes	yes	yes	yes
cfa-mir-539	permissive	no	NA	NA	NA	yes
cfa-mir-542	robust	yes	yes	yes	yes	yes
cfa-mir-543	permissive	no	NA	NA	NA	yes
cfa-mir-544	permissive	no	NA	NA	NA	yes
cfa-mir-545	permissive	no	NA	NA	NA	yes
cfa-mir-551a	robust	yes	yes	yes	yes	yes
cfa-mir-551b	permissive	no	NA	NA	NA	yes
cfa-mir-568	permissive	no	NA	NA	NA	yes
cfa-mir-574	permissive	no	NA	NA	NA	yes
cfa-mir-578	permissive	no	NA	NA	NA	yes
cfa-mir-582	robust	yes	yes	yes	yes	yes
cfa-mir-589	permissive	no	NA	NA	NA	yes
cfa-mir-590	robust	yes	yes	yes	yes	yes
cfa-mir-592	permissive	no	NA	NA	NA	yes
cfa-mir-599	permissive	no	NA	NA	NA	yes
cfa-mir-615	robust	yes	yes	yes	yes	yes
cfa-mir-628	robust	yes	yes	yes	yes	yes
cfa-mir-631	permissive	no	NA	NA	NA	yes
cfa-mir-632	permissive	no	NA	NA	NA	yes
cfa-mir-652	robust	yes	yes	no	yes	yes
cfa-mir-653	permissive	no	NA	NA	NA	yes
cfa-mir-660	robust	yes	yes	yes	yes	yes
cfa-mir-664	permissive	no	NA	NA	NA	yes
cfa-mir-665	permissive	no	NA	NA	NA	yes
cfa-mir-671	robust	yes	yes	yes	yes	yes
cfa-mir-676	robust	yes	yes	yes	yes	yes
cfa-mir-708	robust	yes	yes	no	yes	yes
cfa-mir-718	permissive	no	NA	NA	NA	yes
cfa-mir-758	permissive	no	NA	NA	NA	yes
cfa-mir-759	permissive	no	NA	NA	NA	yes
cfa-mir-761	permissive	no	NA	NA	NA	yes
cfa-mir-764	permissive	no	NA	NA	NA	yes
cfa-mir-769	robust	yes	yes	yes	yes	yes
cfa-mir-802	robust	yes	yes	yes	yes	yes
cfa-mir-872	permissive	no	NA	NA	NA	yes
cfa-mir-873	novel	yes	yes	yes	yes	yes
cfa-mir-874	robust	yes	yes	yes	yes	yes
cfa-mir-875	permissive	no	NA	NA	NA	yes
cfa-mir-876	permissive	no	NA	NA	NA	yes
cfa-mir-885	robust	yes	yes	yes	yes	yes
cfa-mir-889	permissive	no	NA	NA	NA	yes
cfa-mir-935	novel	no	NA	NA	NA	yes
cfa-mir-1185	robust	yes	yes	yes	yes	yes
cfa-mir-1199	permissive	no	NA	NA	NA	yes
cfa-mir-1249	permissive	no	NA	NA	NA	yes
cfa-mir-1251	novel	no	NA	NA	NA	yes
cfa-mir-1271	robust	yes	yes	no	yes	yes
cfa-mir-1277	novel	no	NA	NA	NA	yes
cfa-mir-1296	permissive	no	NA	NA	NA	yes
cfa-mir-1298	novel	no	NA	NA	NA	yes
cfa-mir-1301	robust	yes	yes	yes	yes	yes
cfa-mir-1306	robust	yes	yes	yes	yes	yes
cfa-mir-1307	robust	yes	yes	yes	yes	yes
cfa-mir-1343	robust	yes	yes	yes	yes	yes
cfa-mir-1388	novel	yes	yes	yes	yes	yes
cfa-mir-1468	permissive	no	NA	NA	NA	yes
cfa-mir-1835	permissive	no	NA	NA	NA	yes
cfa-mir-1836	permissive	no	NA	NA	NA	yes
cfa-mir-1837-1	permissive	no	NA	NA	NA	yes
cfa-mir-1837-2	permissive	no	NA	NA	NA	yes
cfa-mir-1838	robust	yes	yes	yes	yes	yes
cfa-mir-1839	robust	yes	yes	yes	yes	yes
cfa-mir-1840	permissive	no	NA	NA	NA	yes
cfa-mir-1841	robust	yes	yes	yes	yes	yes
cfa-mir-1842	robust	yes	yes	yes	yes	yes
cfa-mir-1843	permissive	yes	no	no	no	yes
cfa-mir-1844	robust	yes	yes	yes	yes	yes
cfa-mir-2114	permissive	no	NA	NA	NA	yes
cfa-mir-2355	novel	yes	no	yes	yes	yes
cfa-mir-2387	robust	yes	yes	yes	yes	yes
cfa-mir-2483	robust	yes	yes	yes	yes	yes
cfa-mir-3059	novel	no	NA	NA	NA	yes
cfa-mir-3958	permissive	no	NA	NA	NA	yes
cfa-mir-6516	robust	yes	yes	yes	yes	yes
cfa-mir-6529	robust	yes	yes	yes	yes	yes
cfa-mir-7180	permissive	no	NA	NA	NA	yes
cfa-mir-8789	permissive	no	NA	NA	NA	yes
cfa-mir-8790	permissive	no	NA	NA	NA	yes
cfa-mir-8791a	permissive	no	NA	NA	NA	yes
cfa-mir-8791b	permissive	no	NA	NA	NA	yes
cfa-mir-8792	permissive	no	NA	NA	NA	yes
cfa-mir-8793-1	permissive	no	NA	NA	NA	yes
cfa-mir-8793-2	permissive	no	NA	NA	NA	yes
cfa-mir-8793-3	permissive	no	NA	NA	NA	yes
cfa-mir-8794-1	permissive	no	NA	NA	NA	yes
cfa-mir-8794-2	permissive	no	NA	NA	NA	yes
cfa-mir-8795	permissive	no	NA	NA	NA	yes
cfa-mir-8796	permissive	no	NA	NA	NA	yes
cfa-mir-8797	permissive	no	NA	NA	NA	yes
cfa-mir-8798	permissive	no	NA	NA	NA	yes
cfa-mir-8799a	permissive	no	NA	NA	NA	yes
cfa-mir-8799b	permissive	no	NA	NA	NA	yes
cfa-mir-8799c	permissive	no	NA	NA	NA	yes
cfa-mir-8799d	permissive	no	NA	NA	NA	yes
cfa-mir-8799e-1	permissive	no	NA	NA	NA	yes
cfa-mir-8799e-2	permissive	no	NA	NA	NA	yes
cfa-mir-8799f	permissive	no	NA	NA	NA	yes
cfa-mir-8799g	permissive	no	NA	NA	NA	yes
cfa-mir-8800	permissive	no	NA	NA	NA	yes
cfa-mir-8801	permissive	no	NA	NA	NA	yes
cfa-mir-8802	permissive	no	NA	NA	NA	yes
cfa-mir-8803	permissive	no	NA	NA	NA	yes
cfa-mir-8804	permissive	no	NA	NA	NA	yes
cfa-mir-8805	permissive	no	NA	NA	NA	yes
cfa-mir-8806	permissive	no	NA	NA	NA	yes
cfa-mir-8807	permissive	no	NA	NA	NA	yes
cfa-mir-8808	permissive	no	NA	NA	NA	yes
cfa-mir-8809	permissive	no	NA	NA	NA	yes
cfa-mir-8810	permissive	no	NA	NA	NA	yes
cfa-mir-8811	permissive	no	NA	NA	NA	yes
cfa-mir-8812	permissive	no	NA	NA	NA	yes
cfa-mir-8813-1	permissive	no	NA	NA	NA	yes
cfa-mir-8813-2	permissive	no	NA	NA	NA	yes
cfa-mir-8814	permissive	no	NA	NA	NA	yes
cfa-mir-8815-1	permissive	no	NA	NA	NA	yes
cfa-mir-8815-2	permissive	no	NA	NA	NA	yes
cfa-mir-8816	permissive	no	NA	NA	NA	yes
cfa-mir-8817	permissive	no	NA	NA	NA	yes
cfa-mir-8818	permissive	no	NA	NA	NA	yes
cfa-mir-8819	permissive	no	NA	NA	NA	yes
cfa-mir-8820	permissive	no	NA	NA	NA	yes
cfa-mir-8821	permissive	no	NA	NA	NA	yes
cfa-mir-8822	permissive	no	NA	NA	NA	yes
cfa-mir-8823	permissive	no	NA	NA	NA	yes
cfa-mir-8824	permissive	no	NA	NA	NA	yes
cfa-mir-8825	permissive	no	NA	NA	NA	yes
cfa-mir-8826	permissive	no	NA	NA	NA	yes
cfa-mir-8827	permissive	no	NA	NA	NA	yes
cfa-mir-8828	permissive	no	NA	NA	NA	yes
cfa-mir-8829	permissive	no	NA	NA	NA	yes
cfa-mir-8830-1	permissive	no	NA	NA	NA	yes
cfa-mir-8830-2	permissive	no	NA	NA	NA	yes
cfa-mir-8830-3	permissive	no	NA	NA	NA	yes
cfa-mir-8831	permissive	no	NA	NA	NA	yes
cfa-mir-8832	permissive	no	NA	NA	NA	yes
cfa-mir-8833	permissive	no	NA	NA	NA	yes
cfa-mir-8834a-1	permissive	no	NA	NA	NA	yes
cfa-mir-8834a-2	permissive	no	NA	NA	NA	yes
cfa-mir-8834b	permissive	no	NA	NA	NA	yes
cfa-mir-8835	permissive	no	NA	NA	NA	yes
cfa-mir-8836	permissive	no	NA	NA	NA	yes
cfa-mir-8837	permissive	no	NA	NA	NA	yes
cfa-mir-8838	permissive	no	NA	NA	NA	yes
cfa-mir-8839	permissive	no	NA	NA	NA	yes
cfa-mir-8840	permissive	no	NA	NA	NA	yes
cfa-mir-8841-1	permissive	no	NA	NA	NA	yes
cfa-mir-8841-2	permissive	no	NA	NA	NA	yes
cfa-mir-8842	permissive	no	NA	NA	NA	yes
cfa-mir-8843	permissive	no	NA	NA	NA	yes
cfa-mir-8844	permissive	no	NA	NA	NA	yes
cfa-mir-8845	permissive	no	NA	NA	NA	yes
cfa-mir-8846	permissive	no	NA	NA	NA	yes
cfa-mir-8847	permissive	no	NA	NA	NA	yes
cfa-mir-8848	permissive	no	NA	NA	NA	yes
cfa-mir-8849	permissive	no	NA	NA	NA	yes
cfa-mir-8850	permissive	no	NA	NA	NA	yes
cfa-mir-8851	permissive	no	NA	NA	NA	yes
cfa-mir-8852	permissive	no	NA	NA	NA	yes
cfa-mir-8853	permissive	no	NA	NA	NA	yes
cfa-mir-8854	permissive	no	NA	NA	NA	yes
cfa-mir-8855	permissive	no	NA	NA	NA	yes
cfa-mir-8856	permissive	no	NA	NA	NA	yes
cfa-mir-8857	permissive	no	NA	NA	NA	yes
cfa-mir-8858	permissive	no	NA	NA	NA	yes
cfa-mir-8859a	permissive	no	NA	NA	NA	yes
cfa-mir-8859b	robust	yes	yes	yes	yes	yes
cfa-mir-8860	permissive	no	NA	NA	NA	yes
cfa-mir-8861	permissive	no	NA	NA	NA	yes
cfa-mir-8862	permissive	no	NA	NA	NA	yes
cfa-mir-8863	permissive	no	NA	NA	NA	yes
cfa-mir-8864-1	permissive	no	NA	NA	NA	yes
cfa-mir-8864-2	permissive	no	NA	NA	NA	yes
cfa-mir-8864-3	permissive	no	NA	NA	NA	yes
cfa-mir-8864-4	permissive	no	NA	NA	NA	yes
cfa-mir-8865	permissive	no	NA	NA	NA	yes
cfa-mir-8866	permissive	no	NA	NA	NA	yes
cfa-mir-8867	permissive	no	NA	NA	NA	yes
cfa-mir-8868	permissive	no	NA	NA	NA	yes
cfa-mir-8869	permissive	no	NA	NA	NA	yes
cfa-mir-8870	permissive	no	NA	NA	NA	yes
cfa-mir-8871	permissive	no	NA	NA	NA	yes
cfa-mir-8872	permissive	no	NA	NA	NA	yes
cfa-mir-8873a	permissive	no	NA	NA	NA	yes
cfa-mir-8873b	permissive	no	NA	NA	NA	yes
cfa-mir-8874	permissive	no	NA	NA	NA	yes
cfa-mir-8875	permissive	no	NA	NA	NA	yes
cfa-mir-8876	permissive	no	NA	NA	NA	yes
cfa-mir-8877	permissive	no	NA	NA	NA	yes
cfa-mir-8878	permissive	no	NA	NA	NA	yes
cfa-mir-8879	permissive	no	NA	NA	NA	yes
cfa-mir-8880	permissive	no	NA	NA	NA	yes
cfa-mir-8880	permissive	no	NA	NA	NA	yes
cfa-mir-8880	permissive	no	NA	NA	NA	yes
cfa-mir-8881	permissive	no	NA	NA	NA	yes
cfa-mir-8882	permissive	no	NA	NA	NA	yes
cfa-mir-8883	permissive	no	NA	NA	NA	yes
cfa-mir-8884	permissive	no	NA	NA	NA	yes
cfa-mir-8885	permissive	no	NA	NA	NA	yes
cfa-mir-8886	permissive	no	NA	NA	NA	yes
cfa-mir-8887	permissive	no	NA	NA	NA	yes
cfa-mir-8888	permissive	no	NA	NA	NA	yes
cfa-mir-8889	permissive	no	NA	NA	NA	yes
cfa-mir-8890	permissive	no	NA	NA	NA	yes
cfa-mir-8891	permissive	no	NA	NA	NA	yes
cfa-mir-8892	permissive	no	NA	NA	NA	yes
cfa-mir-8893	permissive	no	NA	NA	NA	yes
cfa-mir-8894	permissive	no	NA	NA	NA	yes
cfa-mir-8895	permissive	no	NA	NA	NA	yes
cfa-mir-8896	permissive	no	NA	NA	NA	yes
cfa-mir-8897	permissive	no	NA	NA	NA	yes
cfa-mir-8898	permissive	no	NA	NA	NA	yes
cfa-mir-8899	permissive	no	NA	NA	NA	yes
cfa-mir-8900	permissive	no	NA	NA	NA	yes
cfa-mir-8901	permissive	no	NA	NA	NA	yes
cfa-mir-8901	permissive	no	NA	NA	NA	yes
cfa-mir-8902	permissive	no	NA	NA	NA	yes
cfa-mir-8903	permissive	no	NA	NA	NA	yes
cfa-mir-8904a	permissive	no	NA	NA	NA	yes
cfa-mir-8904b	permissive	no	NA	NA	NA	yes
cfa-mir-8905	permissive	no	NA	NA	NA	yes
cfa-mir-8905	permissive	no	NA	NA	NA	yes
cfa-mir-8906	permissive	no	NA	NA	NA	yes
cfa-mir-8907	permissive	no	NA	NA	NA	yes
cfa-mir-8908a-1	permissive	no	NA	NA	NA	yes
cfa-mir-8908a-2	permissive	no	NA	NA	NA	yes
cfa-mir-8908a-3	permissive	no	NA	NA	NA	yes
cfa-mir-8908a-4	permissive	no	NA	NA	NA	yes
cfa-mir-8908b	robust	yes	yes	yes	yes	yes
cfa-mir-8908c	permissive	no	NA	NA	NA	yes
cfa-mir-8908d-1	permissive	no	NA	NA	NA	yes
cfa-mir-8908d-2	permissive	no	NA	NA	NA	yes
cfa-mir-8908d-3	permissive	no	NA	NA	NA	yes
cfa-mir-8908e	permissive	no	NA	NA	NA	yes
cfa-mir-8908f	robust	yes	yes	yes	yes	yes
cfa-novelmir-1	novel	no	NA	NA	NA	yes
cfa-novelmir-3	novel	no	NA	NA	NA	yes
cfa-novelmir-4	novel	no	NA	NA	NA	yes
cfa-novelmir-5	novel	no	NA	NA	NA	yes
cfa-novelmir-6	novel	no	NA	NA	NA	yes
cfa-novelmir-7	novel	yes	no	no	yes	yes
cfa-novelmir-8	novel	no	NA	NA	NA	yes
cfa-novelmir-10	novel	no	NA	NA	NA	yes
cfa-novelmir-11	novel	no	NA	NA	NA	yes
cfa-novelmir-12	novel	no	NA	NA	NA	yes
cfa-novelmir-13	novel	no	NA	NA	NA	yes
cfa-novelmir-14	novel	no	NA	NA	NA	yes
cfa-novelmir-15	novel	no	NA	NA	NA	yes
cfa-novelmir-16	novel	no	NA	NA	NA	yes
cfa-novelmir-17	novel	no	NA	NA	NA	yes
cfa-novelmir-18	novel	no	NA	NA	NA	yes
cfa-novelmir-19	novel	no	NA	NA	NA	yes
cfa-novelmir-22	novel	no	NA	NA	NA	no
cfa-novelmir-23	novel	no	NA	NA	NA	yes
cfa-novelmir-24	novel	no	NA	NA	NA	yes
cfa-novelmir-25	novel	no	NA	NA	NA	yes
cfa-novelmir-27	novel	no	NA	NA	NA	yes
cfa-novelmir-28	novel	no	NA	NA	NA	yes
cfa-novelmir-29	novel	no	NA	NA	NA	yes
cfa-novelmir-30	novel	no	NA	NA	NA	yes
cfa-novelmir-31	novel	no	NA	NA	NA	yes
cfa-novelmir-32	novel	yes	yes	yes	yes	yes
cfa-novelmir-33	novel	no	NA	NA	NA	yes
cfa-novelmir-34	novel	no	NA	NA	NA	yes
cfa-novelmir-35	novel	no	NA	NA	NA	yes
cfa-novelmir-36	novel	no	NA	NA	NA	yes
cfa-novelmir-37	novel	no	NA	NA	NA	yes
cfa-novelmir-38	novel	yes	no	no	yes	no
cfa-novelmir-40	novel	no	NA	NA	NA	yes
cfa-novelmir-41	novel	yes	yes	no	yes	yes
cfa-novelmir-42	novel	no	NA	NA	NA	yes
cfa-novelmir-43	novel	yes	yes	yes	yes	yes
cfa-novelmir-44	novel	no	NA	NA	NA	yes
cfa-novelmir-45	novel	no	NA	NA	NA	yes
cfa-novelmir-46	novel	no	NA	NA	NA	yes
cfa-novelmir-47	novel	no	NA	NA	NA	yes
cfa-novelmir-48	novel	no	NA	NA	NA	yes
cfa-novelmir-49	novel	no	NA	NA	NA	yes
cfa-novelmir-50	novel	no	NA	NA	NA	yes
cfa-novelmir-51	novel	no	NA	NA	NA	yes
cfa-novelmir-52	novel	no	NA	NA	NA	yes
cfa-novelmir-53	novel	no	NA	NA	NA	yes
cfa-novelmir-54	novel	no	NA	NA	NA	yes
cfa-novelmir-55	novel	no	NA	NA	NA	yes
cfa-novelmir-56	novel	yes	yes	yes	yes	yes
cfa-novelmir-57	novel	no	NA	NA	NA	yes
cfa-novelmir-58	novel	no	NA	NA	NA	yes
cfa-novelmir-59	novel	no	NA	NA	NA	yes
cfa-novelmir-61	novel	no	NA	NA	NA	yes
cfa-novelmir-62	novel	no	NA	NA	NA	yes
cfa-novelmir-64	novel	no	NA	NA	NA	yes
cfa-novelmir-67	novel	no	NA	NA	NA	yes
cfa-novelmir-68	novel	no	NA	NA	NA	yes
cfa-novelmir-69	novel	no	NA	NA	NA	yes

## Sheet: TableS9c
Pre-miRNAs in chicken
Name	Set	Sufficient tags?	5' end consistent?	3' end overhang?	Suffient basepairing nucleotides?	Suffient basepairing energy?
gga-let-7a-1	robust	yes	yes	yes	yes	yes
gga-let-7a-2	robust	yes	yes	yes	yes	yes
gga-let-7a-3	robust	yes	yes	yes	yes	yes
gga-let-7b	permissive	no	NA	NA	NA	yes
gga-let-7c	robust	yes	yes	yes	yes	yes
gga-let-7d	robust	yes	yes	yes	yes	yes
gga-let-7f	robust	yes	yes	yes	yes	yes
gga-let-7g	robust	yes	yes	yes	yes	yes
gga-let-7i	permissive	no	NA	NA	NA	yes
gga-let-7j	robust	yes	yes	yes	yes	yes
gga-let-7k	robust	yes	yes	yes	yes	yes
gga-mir-1a-1	permissive	no	NA	NA	NA	yes
gga-mir-1a-2	permissive	no	NA	NA	NA	yes
gga-mir-1b	permissive	no	NA	NA	NA	yes
gga-mir-1c	permissive	no	NA	NA	NA	yes
gga-mir-7-1	robust	yes	yes	yes	yes	yes
gga-mir-7-2	robust	yes	yes	yes	yes	yes
gga-mir-7-3	permissive	no	NA	NA	NA	yes
gga-mir-7b	novel	no	NA	NA	NA	yes
gga-mir-9-1	robust	yes	yes	yes	yes	yes
gga-mir-9-2	robust	yes	yes	yes	yes	yes
gga-mir-10a	robust	yes	yes	yes	yes	yes
gga-mir-10b	robust	yes	yes	yes	yes	yes
gga-mir-10c	novel	no	NA	NA	NA	yes
gga-mir-15a	robust	yes	yes	no	yes	yes
gga-mir-15b	robust	yes	yes	yes	yes	yes
gga-mir-15c	robust	yes	yes	yes	yes	yes
gga-mir-16-1	robust	yes	yes	yes	yes	yes
gga-mir-16-2	robust	yes	yes	yes	yes	yes
gga-mir-16c	permissive	no	NA	NA	NA	yes
gga-mir-17	robust	yes	yes	yes	yes	yes
gga-mir-18a	robust	yes	yes	yes	yes	yes
gga-mir-18b	permissive	yes	no	no	yes	yes
gga-mir-19a	robust	yes	yes	no	yes	yes
gga-mir-19b	robust	yes	yes	yes	yes	yes
gga-mir-20a	robust	yes	yes	yes	yes	yes
gga-mir-20b	robust	yes	yes	yes	yes	yes
gga-mir-21	robust	yes	yes	yes	yes	yes
gga-mir-22	robust	yes	yes	yes	yes	yes
gga-mir-23b	permissive	no	NA	NA	NA	yes
gga-mir-24	robust	yes	yes	yes	yes	yes
gga-mir-26a	robust	yes	yes	yes	yes	yes
gga-mir-27b	robust	yes	yes	yes	yes	yes
gga-mir-29a	robust	yes	yes	yes	yes	yes
gga-mir-29b-1	robust	yes	yes	yes	yes	yes
gga-mir-29b-2	permissive	no	NA	NA	NA	yes
gga-mir-29c	permissive	no	NA	NA	NA	yes
gga-mir-30a	robust	yes	yes	yes	yes	yes
gga-mir-30b	permissive	no	NA	NA	NA	yes
gga-mir-30c-1	robust	yes	yes	yes	yes	yes
gga-mir-30c-2	robust	yes	yes	yes	yes	yes
gga-mir-30d	robust	yes	yes	yes	yes	yes
gga-mir-30e	robust	yes	yes	yes	yes	yes
gga-mir-31	robust	yes	yes	yes	yes	yes
gga-mir-32	robust	yes	yes	yes	yes	yes
gga-mir-33-1	permissive	yes	no	no	yes	yes
gga-mir-34a	robust	yes	yes	yes	yes	yes
gga-mir-34b	permissive	no	NA	NA	NA	yes
gga-mir-34c	robust	yes	yes	yes	yes	yes
gga-mir-92-1	robust	yes	yes	yes	yes	yes
gga-mir-96	novel	yes	yes	yes	yes	yes
gga-mir-99a	robust	yes	yes	yes	yes	yes
gga-mir-100	robust	yes	yes	yes	yes	yes
gga-mir-101-1	permissive	no	NA	NA	NA	yes
gga-mir-101-2	robust	yes	yes	yes	yes	yes
gga-mir-103-1	permissive	no	NA	NA	NA	yes
gga-mir-103-2	permissive	no	NA	NA	NA	yes
gga-mir-106	robust	yes	yes	yes	yes	yes
gga-mir-107	robust	yes	yes	yes	yes	yes
gga-mir-122-1	robust	yes	yes	yes	yes	yes
gga-mir-122b	permissive	no	NA	NA	NA	yes
gga-mir-124a	robust	yes	yes	yes	yes	yes
gga-mir-124a-2	robust	yes	yes	yes	yes	yes
gga-mir-124b	permissive	no	NA	NA	NA	yes
gga-mir-124c	permissive	no	NA	NA	NA	yes
gga-mir-125b-1	novel	no	NA	NA	NA	yes
gga-mir-125b-2	robust	yes	yes	yes	yes	yes
gga-mir-126	robust	yes	yes	yes	yes	yes
gga-mir-128-1	robust	yes	yes	yes	yes	yes
gga-mir-128-2	robust	yes	yes	yes	yes	yes
gga-mir-130a	robust	yes	yes	yes	yes	yes
gga-mir-130b	robust	yes	yes	yes	yes	yes
gga-mir-130c	robust	yes	yes	yes	yes	yes
gga-mir-133a-1	robust	yes	yes	yes	yes	yes
gga-mir-133a-2	robust	yes	yes	yes	yes	yes
gga-mir-133b	robust	yes	yes	yes	yes	yes
gga-mir-133c	permissive	no	NA	NA	NA	yes
gga-mir-135a-1	permissive	no	NA	NA	NA	yes
gga-mir-135a-2	robust	yes	yes	yes	yes	yes
gga-mir-135a-3	permissive	no	NA	NA	NA	yes
gga-mir-135b	permissive	no	NA	NA	NA	no
gga-mir-137	robust	yes	yes	yes	yes	yes
gga-mir-138-1	robust	yes	yes	yes	yes	yes
gga-mir-138-2	robust	yes	yes	yes	yes	yes
gga-mir-140	robust	yes	yes	no	yes	yes
gga-mir-142	robust	yes	yes	yes	yes	yes
gga-mir-143	novel	yes	yes	yes	yes	yes
gga-mir-144	robust	yes	yes	yes	yes	yes
gga-mir-145	novel	yes	yes	yes	yes	yes
gga-mir-146a	robust	yes	yes	yes	yes	yes
gga-mir-146b	robust	yes	yes	no	yes	yes
gga-mir-146c	robust	yes	yes	yes	yes	yes
gga-mir-147	permissive	no	NA	NA	NA	yes
gga-mir-148a	robust	yes	yes	yes	yes	yes
gga-mir-148b	novel	yes	yes	yes	yes	yes
gga-mir-153	robust	yes	yes	yes	yes	yes
gga-mir-155	permissive	no	NA	NA	NA	yes
gga-mir-181a-1	robust	yes	yes	yes	yes	yes
gga-mir-181a-2	robust	yes	yes	yes	yes	yes
gga-mir-181b-1	robust	yes	no	yes	yes	yes
gga-mir-181b-2	robust	yes	no	yes	yes	yes
gga-mir-182	novel	no	NA	NA	NA	yes
gga-mir-183	robust	yes	yes	yes	yes	yes
gga-mir-184	permissive	no	NA	NA	NA	yes
gga-mir-187	permissive	no	NA	NA	NA	yes
gga-mir-190a	robust	yes	yes	yes	yes	yes
gga-mir-190b	novel	no	NA	NA	NA	yes
gga-mir-191	novel	yes	yes	yes	yes	yes
gga-mir-193a	novel	yes	yes	yes	yes	yes
gga-mir-193b	robust	yes	yes	yes	yes	yes
gga-mir-194	permissive	no	NA	NA	NA	yes
gga-mir-196-1	robust	yes	yes	yes	yes	yes
gga-mir-196-2	permissive	no	NA	NA	NA	yes
gga-mir-196-4	permissive	no	NA	NA	NA	yes
gga-mir-196-5	permissive	no	NA	NA	NA	yes
gga-mir-199-1	robust	yes	yes	yes	yes	yes
gga-mir-199-2	robust	yes	yes	yes	yes	yes
gga-mir-199b	permissive	no	NA	NA	NA	yes
gga-mir-200a	robust	yes	yes	yes	yes	yes
gga-mir-200b	robust	yes	yes	yes	yes	yes
gga-mir-202	permissive	no	NA	NA	NA	yes
gga-mir-203a	robust	yes	yes	yes	yes	yes
gga-mir-204-1	permissive	no	NA	NA	NA	yes
gga-mir-204-2	robust	yes	no	yes	yes	yes
gga-mir-205a	robust	yes	yes	yes	yes	yes
gga-mir-205b	permissive	no	NA	NA	NA	yes
gga-mir-206	robust	yes	yes	yes	yes	yes
gga-mir-211	robust	yes	yes	yes	yes	yes
gga-mir-212	novel	yes	yes	yes	yes	yes
gga-mir-214	robust	yes	yes	yes	yes	yes
gga-mir-215	permissive	no	NA	NA	NA	yes
gga-mir-216a	permissive	no	NA	NA	NA	yes
gga-mir-216b	robust	yes	no	yes	yes	yes
gga-mir-216c	permissive	no	NA	NA	NA	yes
gga-mir-217	permissive	no	NA	NA	NA	yes
gga-mir-218-1	permissive	no	NA	NA	NA	yes
gga-mir-218-2	robust	yes	no	yes	yes	yes
gga-mir-219a	permissive	no	NA	NA	NA	yes
gga-mir-219b	robust	yes	yes	no	yes	yes
gga-mir-221	robust	yes	yes	no	yes	yes
gga-mir-222a	robust	yes	yes	yes	yes	yes
gga-mir-222b	permissive	no	NA	NA	NA	yes
gga-mir-223	robust	yes	yes	no	yes	yes
gga-mir-301a	robust	yes	yes	yes	yes	yes
gga-mir-301b	robust	yes	yes	yes	yes	yes
gga-mir-302a	permissive	no	NA	NA	NA	yes
gga-mir-302b	permissive	no	NA	NA	NA	yes
gga-mir-302c	permissive	no	NA	NA	NA	yes
gga-mir-302d	permissive	no	NA	NA	NA	yes
gga-mir-338	novel	yes	yes	yes	yes	yes
gga-mir-365-1	robust	yes	yes	yes	yes	yes
gga-mir-365-2	robust	yes	yes	yes	yes	yes
gga-mir-365b	permissive	no	NA	NA	NA	yes
gga-mir-367	permissive	no	NA	NA	NA	yes
gga-mir-375	permissive	no	NA	NA	NA	yes
gga-mir-383	robust	yes	yes	yes	yes	yes
gga-mir-425	novel	yes	yes	yes	yes	yes
gga-mir-429	robust	yes	yes	yes	yes	yes
gga-mir-449a	permissive	no	NA	NA	NA	yes
gga-mir-449b	permissive	no	NA	NA	NA	yes
gga-mir-449c	robust	yes	yes	yes	yes	yes
gga-mir-449d	novel	no	NA	NA	NA	yes
gga-mir-451	permissive	no	NA	NA	NA	yes
gga-mir-454	permissive	no	NA	NA	NA	yes
gga-mir-455	robust	yes	no	yes	yes	yes
gga-mir-456	robust	yes	no	yes	yes	yes
gga-mir-458a	robust	yes	yes	yes	yes	yes
gga-mir-458b	permissive	no	NA	NA	NA	yes
gga-mir-460a	robust	yes	yes	yes	yes	yes
gga-mir-460b	robust	yes	yes	yes	yes	yes
gga-mir-466	permissive	no	NA	NA	NA	yes
gga-mir-489	permissive	no	NA	NA	NA	yes
gga-mir-490	robust	yes	yes	yes	yes	yes
gga-mir-499	robust	yes	yes	yes	yes	yes
gga-mir-551	robust	yes	yes	yes	yes	yes
gga-mir-757	permissive	no	NA	NA	NA	yes
gga-mir-762	permissive	no	NA	NA	NA	yes
gga-mir-1306	robust	yes	yes	yes	yes	yes
gga-mir-1329	robust	yes	no	yes	yes	yes
gga-mir-1354	permissive	no	NA	NA	NA	yes
gga-mir-1388a	novel	yes	yes	yes	yes	yes
gga-mir-1397	permissive	no	NA	NA	NA	yes
gga-mir-1416	robust	yes	yes	yes	yes	yes
gga-mir-1434	permissive	yes	no	no	yes	yes
gga-mir-1451	robust	yes	yes	yes	yes	yes
gga-mir-1452	permissive	no	NA	NA	NA	yes
gga-mir-1453	permissive	no	NA	NA	NA	yes
gga-mir-1454	permissive	no	NA	NA	NA	no
gga-mir-1456	robust	yes	yes	yes	yes	yes
gga-mir-1457	permissive	no	NA	NA	NA	yes
gga-mir-1458	permissive	no	NA	NA	NA	yes
gga-mir-1459	permissive	no	NA	NA	NA	no
gga-mir-1460	permissive	no	NA	NA	NA	yes
gga-mir-1462	permissive	no	NA	NA	NA	yes
gga-mir-1463	permissive	no	NA	NA	NA	yes
gga-mir-1464	permissive	no	NA	NA	NA	yes
gga-mir-1465	permissive	no	NA	NA	NA	yes
gga-mir-1466	permissive	no	NA	NA	NA	yes
gga-mir-1467-1	robust	yes	yes	yes	yes	yes
gga-mir-1467-2	robust	yes	yes	yes	yes	yes
gga-mir-1550	permissive	no	NA	NA	NA	yes
gga-mir-1551	permissive	no	NA	NA	NA	yes
gga-mir-1552	novel	yes	yes	yes	yes	yes
gga-mir-1553	permissive	no	NA	NA	NA	yes
gga-mir-1554	permissive	no	NA	NA	NA	yes
gga-mir-1555	permissive	no	NA	NA	NA	yes
gga-mir-1556	permissive	no	NA	NA	NA	yes
gga-mir-1557	permissive	no	NA	NA	NA	yes
gga-mir-1558	permissive	no	NA	NA	NA	yes
gga-mir-1559	robust	yes	yes	yes	yes	yes
gga-mir-1560	robust	yes	yes	yes	yes	yes
gga-mir-1561	permissive	no	NA	NA	NA	yes
gga-mir-1562	permissive	no	NA	NA	NA	yes
gga-mir-1563	permissive	no	NA	NA	NA	no
gga-mir-1564	permissive	no	NA	NA	NA	yes
gga-mir-1565	permissive	no	NA	NA	NA	yes
gga-mir-1567	permissive	no	NA	NA	NA	yes
gga-mir-1568	permissive	no	NA	NA	NA	yes
gga-mir-1569	permissive	no	NA	NA	NA	yes
gga-mir-1570	permissive	no	NA	NA	NA	yes
gga-mir-1571	permissive	no	NA	NA	NA	yes
gga-mir-1572	permissive	no	NA	NA	NA	yes
gga-mir-1573	permissive	no	NA	NA	NA	yes
gga-mir-1574	permissive	no	NA	NA	NA	yes
gga-mir-1575	permissive	no	NA	NA	NA	yes
gga-mir-1576	permissive	no	NA	NA	NA	yes
gga-mir-1577	permissive	no	NA	NA	NA	yes
gga-mir-1578	permissive	no	NA	NA	NA	yes
gga-mir-1579	permissive	no	NA	NA	NA	yes
gga-mir-1580	permissive	no	NA	NA	NA	yes
gga-mir-1581	permissive	no	NA	NA	NA	yes
gga-mir-1582	permissive	no	NA	NA	NA	yes
gga-mir-1583	permissive	no	NA	NA	NA	yes
gga-mir-1584	permissive	no	NA	NA	NA	yes
gga-mir-1585	permissive	no	NA	NA	NA	yes
gga-mir-1586	permissive	no	NA	NA	NA	yes
gga-mir-1587	permissive	no	NA	NA	NA	yes
gga-mir-1588	permissive	no	NA	NA	NA	yes
gga-mir-1589	permissive	no	NA	NA	NA	yes
gga-mir-1590	permissive	no	NA	NA	NA	yes
gga-mir-1591	permissive	no	NA	NA	NA	yes
gga-mir-1592	permissive	no	NA	NA	NA	yes
gga-mir-1593	permissive	no	NA	NA	NA	yes
gga-mir-1594	permissive	no	NA	NA	NA	yes
gga-mir-1595	permissive	no	NA	NA	NA	yes
gga-mir-1596	permissive	no	NA	NA	NA	yes
gga-mir-1597	permissive	no	NA	NA	NA	yes
gga-mir-1598	permissive	no	NA	NA	NA	yes
gga-mir-1599	permissive	no	NA	NA	NA	yes
gga-mir-1600	permissive	no	NA	NA	NA	yes
gga-mir-1601	permissive	no	NA	NA	NA	yes
gga-mir-1602	permissive	no	NA	NA	NA	yes
gga-mir-1603	permissive	no	NA	NA	NA	yes
gga-mir-1604	permissive	no	NA	NA	NA	yes
gga-mir-1605	permissive	no	NA	NA	NA	yes
gga-mir-1606	permissive	no	NA	NA	NA	yes
gga-mir-1607	permissive	no	NA	NA	NA	yes
gga-mir-1608	permissive	no	NA	NA	NA	yes
gga-mir-1609	permissive	no	NA	NA	NA	yes
gga-mir-1610	permissive	no	NA	NA	NA	yes
gga-mir-1611	permissive	no	NA	NA	NA	yes
gga-mir-1612	permissive	no	NA	NA	NA	yes
gga-mir-1613	permissive	no	NA	NA	NA	yes
gga-mir-1614	permissive	no	NA	NA	NA	yes
gga-mir-1615	permissive	no	NA	NA	NA	yes
gga-mir-1616	permissive	no	NA	NA	NA	yes
gga-mir-1617	permissive	no	NA	NA	NA	yes
gga-mir-1618	permissive	no	NA	NA	NA	yes
gga-mir-1619	permissive	no	NA	NA	NA	yes
gga-mir-1620	permissive	no	NA	NA	NA	yes
gga-mir-1621	permissive	no	NA	NA	NA	yes
gga-mir-1622	permissive	no	NA	NA	NA	yes
gga-mir-1623	permissive	no	NA	NA	NA	yes
gga-mir-1624	permissive	no	NA	NA	NA	yes
gga-mir-1625	permissive	no	NA	NA	NA	yes
gga-mir-1626	permissive	no	NA	NA	NA	yes
gga-mir-1627	permissive	no	NA	NA	NA	yes
gga-mir-1628	permissive	no	NA	NA	NA	yes
gga-mir-1629	permissive	no	NA	NA	NA	yes
gga-mir-1630	permissive	no	NA	NA	NA	yes
gga-mir-1631	permissive	no	NA	NA	NA	yes
gga-mir-1632	permissive	no	NA	NA	NA	yes
gga-mir-1633	permissive	no	NA	NA	NA	yes
gga-mir-1634-1	permissive	no	NA	NA	NA	yes
gga-mir-1635	permissive	no	NA	NA	NA	yes
gga-mir-1636	permissive	no	NA	NA	NA	yes
gga-mir-1637	permissive	no	NA	NA	NA	yes
gga-mir-1638	permissive	no	NA	NA	NA	no
gga-mir-1639	permissive	no	NA	NA	NA	yes
gga-mir-1640	permissive	no	NA	NA	NA	yes
gga-mir-1641	permissive	no	NA	NA	NA	yes
gga-mir-1642	permissive	no	NA	NA	NA	yes
gga-mir-1643	permissive	no	NA	NA	NA	yes
gga-mir-1644	permissive	no	NA	NA	NA	yes
gga-mir-1645	permissive	no	NA	NA	NA	yes
gga-mir-1646	permissive	no	NA	NA	NA	yes
gga-mir-1647	permissive	no	NA	NA	NA	yes
gga-mir-1648	permissive	no	NA	NA	NA	yes
gga-mir-1649	permissive	no	NA	NA	NA	yes
gga-mir-1650	permissive	no	NA	NA	NA	yes
gga-mir-1651	permissive	no	NA	NA	NA	yes
gga-mir-1652	permissive	no	NA	NA	NA	yes
gga-mir-1653	permissive	no	NA	NA	NA	yes
gga-mir-1654	permissive	no	NA	NA	NA	yes
gga-mir-1655	permissive	no	NA	NA	NA	yes
gga-mir-1656	permissive	no	NA	NA	NA	yes
gga-mir-1657	permissive	no	NA	NA	NA	yes
gga-mir-1658	permissive	no	NA	NA	NA	yes
gga-mir-1659	permissive	no	NA	NA	NA	yes
gga-mir-1660	permissive	no	NA	NA	NA	yes
gga-mir-1661	permissive	no	NA	NA	NA	yes
gga-mir-1662	robust	yes	yes	yes	yes	yes
gga-mir-1663	permissive	no	NA	NA	NA	yes
gga-mir-1664	permissive	no	NA	NA	NA	yes
gga-mir-1665	permissive	no	NA	NA	NA	yes
gga-mir-1666	permissive	no	NA	NA	NA	yes
gga-mir-1667	permissive	no	NA	NA	NA	yes
gga-mir-1668	novel	no	NA	NA	NA	yes
gga-mir-1669	permissive	no	NA	NA	NA	yes
gga-mir-1670	permissive	no	NA	NA	NA	yes
gga-mir-1671	permissive	no	NA	NA	NA	yes
gga-mir-1672	permissive	no	NA	NA	NA	yes
gga-mir-1673	permissive	no	NA	NA	NA	yes
gga-mir-1674	permissive	no	NA	NA	NA	yes
gga-mir-1675	permissive	no	NA	NA	NA	yes
gga-mir-1676	permissive	no	NA	NA	NA	yes
gga-mir-1677	robust	yes	yes	yes	yes	yes
gga-mir-1678	permissive	no	NA	NA	NA	yes
gga-mir-1679	permissive	no	NA	NA	NA	yes
gga-mir-1680	permissive	no	NA	NA	NA	yes
gga-mir-1681	permissive	no	NA	NA	NA	no
gga-mir-1682	permissive	no	NA	NA	NA	yes
gga-mir-1683	permissive	no	NA	NA	NA	yes
gga-mir-1684a	robust	yes	yes	yes	yes	yes
gga-mir-1685	permissive	no	NA	NA	NA	yes
gga-mir-1686	permissive	no	NA	NA	NA	yes
gga-mir-1687	permissive	no	NA	NA	NA	yes
gga-mir-1688	permissive	no	NA	NA	NA	yes
gga-mir-1689	permissive	no	NA	NA	NA	yes
gga-mir-1690	permissive	no	NA	NA	NA	yes
gga-mir-1691	permissive	no	NA	NA	NA	yes
gga-mir-1692	permissive	no	NA	NA	NA	no
gga-mir-1693	permissive	no	NA	NA	NA	yes
gga-mir-1694	permissive	no	NA	NA	NA	yes
gga-mir-1695	permissive	no	NA	NA	NA	yes
gga-mir-1696	permissive	no	NA	NA	NA	yes
gga-mir-1697	permissive	no	NA	NA	NA	yes
gga-mir-1698-1	permissive	no	NA	NA	NA	yes
gga-mir-1698-2	permissive	no	NA	NA	NA	yes
gga-mir-1699	permissive	no	NA	NA	NA	yes
gga-mir-1700	permissive	no	NA	NA	NA	yes
gga-mir-1701	permissive	no	NA	NA	NA	no
gga-mir-1702	permissive	no	NA	NA	NA	yes
gga-mir-1703	permissive	no	NA	NA	NA	yes
gga-mir-1704	permissive	no	NA	NA	NA	yes
gga-mir-1705	permissive	no	NA	NA	NA	yes
gga-mir-1706	permissive	no	NA	NA	NA	yes
gga-mir-1707	permissive	no	NA	NA	NA	yes
gga-mir-1708	permissive	no	NA	NA	NA	yes
gga-mir-1709	permissive	no	NA	NA	NA	yes
gga-mir-1710	permissive	no	NA	NA	NA	yes
gga-mir-1711	permissive	no	NA	NA	NA	yes
gga-mir-1712	permissive	no	NA	NA	NA	yes
gga-mir-1713	permissive	no	NA	NA	NA	yes
gga-mir-1714	permissive	no	NA	NA	NA	yes
gga-mir-1715	permissive	no	NA	NA	NA	yes
gga-mir-1716	permissive	no	NA	NA	NA	yes
gga-mir-1717	permissive	no	NA	NA	NA	yes
gga-mir-1718	permissive	no	NA	NA	NA	yes
gga-mir-1719	permissive	no	NA	NA	NA	no
gga-mir-1720	robust	yes	yes	yes	yes	yes
gga-mir-1721	permissive	no	NA	NA	NA	yes
gga-mir-1722	permissive	no	NA	NA	NA	yes
gga-mir-1723	permissive	no	NA	NA	NA	yes
gga-mir-1724	permissive	no	NA	NA	NA	yes
gga-mir-1725	permissive	no	NA	NA	NA	yes
gga-mir-1726	permissive	no	NA	NA	NA	yes
gga-mir-1727	permissive	no	NA	NA	NA	yes
gga-mir-1728	permissive	no	NA	NA	NA	yes
gga-mir-1729	robust	yes	yes	yes	yes	yes
gga-mir-1730	permissive	no	NA	NA	NA	yes
gga-mir-1731	permissive	no	NA	NA	NA	yes
gga-mir-1732-1	permissive	no	NA	NA	NA	yes
gga-mir-1732-2	permissive	no	NA	NA	NA	yes
gga-mir-1732-3	permissive	no	NA	NA	NA	yes
gga-mir-1733	permissive	no	NA	NA	NA	yes
gga-mir-1734	permissive	no	NA	NA	NA	yes
gga-mir-1735	permissive	no	NA	NA	NA	yes
gga-mir-1736	permissive	no	NA	NA	NA	yes
gga-mir-1737	permissive	no	NA	NA	NA	yes
gga-mir-1738	permissive	no	NA	NA	NA	yes
gga-mir-1739	permissive	no	NA	NA	NA	yes
gga-mir-1740	permissive	no	NA	NA	NA	yes
gga-mir-1741	permissive	no	NA	NA	NA	yes
gga-mir-1742	permissive	no	NA	NA	NA	yes
gga-mir-1743	permissive	no	NA	NA	NA	yes
gga-mir-1744	permissive	no	NA	NA	NA	yes
gga-mir-1745	permissive	no	NA	NA	NA	yes
gga-mir-1746	permissive	no	NA	NA	NA	yes
gga-mir-1747	robust	yes	yes	yes	yes	yes
gga-mir-1748	permissive	no	NA	NA	NA	yes
gga-mir-1749	permissive	no	NA	NA	NA	yes
gga-mir-1750	permissive	no	NA	NA	NA	yes
gga-mir-1751	permissive	no	NA	NA	NA	yes
gga-mir-1752	permissive	no	NA	NA	NA	yes
gga-mir-1753	permissive	no	NA	NA	NA	yes
gga-mir-1754	permissive	no	NA	NA	NA	yes
gga-mir-1755	permissive	no	NA	NA	NA	yes
gga-mir-1756a	permissive	no	NA	NA	NA	yes
gga-mir-1756b	permissive	no	NA	NA	NA	yes
gga-mir-1757	permissive	no	NA	NA	NA	yes
gga-mir-1758	permissive	no	NA	NA	NA	yes
gga-mir-1759	permissive	no	NA	NA	NA	yes
gga-mir-1760	permissive	no	NA	NA	NA	yes
gga-mir-1761	permissive	no	NA	NA	NA	yes
gga-mir-1762	permissive	no	NA	NA	NA	yes
gga-mir-1763	permissive	no	NA	NA	NA	yes
gga-mir-1764	permissive	no	NA	NA	NA	yes
gga-mir-1765	permissive	no	NA	NA	NA	yes
gga-mir-1766	permissive	no	NA	NA	NA	yes
gga-mir-1767	permissive	no	NA	NA	NA	yes
gga-mir-1768	permissive	no	NA	NA	NA	yes
gga-mir-1769	permissive	no	NA	NA	NA	yes
gga-mir-1770	permissive	no	NA	NA	NA	yes
gga-mir-1771	permissive	no	NA	NA	NA	yes
gga-mir-1772	permissive	no	NA	NA	NA	yes
gga-mir-1773	permissive	no	NA	NA	NA	yes
gga-mir-1774	permissive	no	NA	NA	NA	yes
gga-mir-1775	permissive	no	NA	NA	NA	yes
gga-mir-1776	permissive	no	NA	NA	NA	yes
gga-mir-1777	permissive	no	NA	NA	NA	yes
gga-mir-1778	permissive	no	NA	NA	NA	yes
gga-mir-1779	permissive	no	NA	NA	NA	yes
gga-mir-1780	permissive	no	NA	NA	NA	yes
gga-mir-1781	permissive	no	NA	NA	NA	yes
gga-mir-1782	permissive	no	NA	NA	NA	yes
gga-mir-1783	permissive	no	NA	NA	NA	yes
gga-mir-1784	permissive	no	NA	NA	NA	yes
gga-mir-1785	permissive	no	NA	NA	NA	yes
gga-mir-1786	permissive	no	NA	NA	NA	yes
gga-mir-1787	permissive	no	NA	NA	NA	yes
gga-mir-1788	permissive	no	NA	NA	NA	yes
gga-mir-1789	permissive	no	NA	NA	NA	yes
gga-mir-1790	permissive	no	NA	NA	NA	yes
gga-mir-1791	permissive	no	NA	NA	NA	yes
gga-mir-1792	permissive	no	NA	NA	NA	yes
gga-mir-1793	permissive	no	NA	NA	NA	yes
gga-mir-1794	permissive	no	NA	NA	NA	yes
gga-mir-1795	permissive	no	NA	NA	NA	yes
gga-mir-1796	permissive	no	NA	NA	NA	yes
gga-mir-1797	permissive	no	NA	NA	NA	yes
gga-mir-1798	permissive	no	NA	NA	NA	yes
gga-mir-1799	permissive	no	NA	NA	NA	yes
gga-mir-1800	permissive	no	NA	NA	NA	yes
gga-mir-1801	permissive	no	NA	NA	NA	yes
gga-mir-1802	permissive	no	NA	NA	NA	yes
gga-mir-1803	permissive	no	NA	NA	NA	yes
gga-mir-1804	permissive	no	NA	NA	NA	yes
gga-mir-1805	robust	yes	yes	yes	yes	yes
gga-mir-1806	permissive	no	NA	NA	NA	yes
gga-mir-1807	permissive	no	NA	NA	NA	yes
gga-mir-1808	permissive	no	NA	NA	NA	yes
gga-mir-1809	permissive	no	NA	NA	NA	yes
gga-mir-1811	permissive	no	NA	NA	NA	yes
gga-mir-1812	permissive	no	NA	NA	NA	yes
gga-mir-1813-1	permissive	no	NA	NA	NA	yes
gga-mir-1813-2	permissive	no	NA	NA	NA	yes
gga-mir-1814	permissive	no	NA	NA	NA	yes
gga-mir-1815	permissive	no	NA	NA	NA	yes
gga-mir-1816	permissive	no	NA	NA	NA	yes
gga-mir-1845	permissive	no	NA	NA	NA	yes
gga-mir-2126	permissive	no	NA	NA	NA	yes
gga-mir-2127	permissive	no	NA	NA	NA	yes
gga-mir-2128	permissive	no	NA	NA	NA	yes
gga-mir-2129	permissive	no	NA	NA	NA	yes
gga-mir-2131	robust	yes	yes	yes	yes	yes
gga-mir-2184a	novel	no	NA	NA	NA	yes
gga-mir-2188	robust	yes	no	yes	yes	yes
gga-mir-2954	robust	yes	yes	no	yes	yes
gga-mir-2970	novel	yes	yes	yes	yes	yes
gga-mir-3064	permissive	no	NA	NA	NA	yes
gga-mir-3523	robust	yes	yes	yes	yes	yes
gga-mir-3524a	permissive	no	NA	NA	NA	yes
gga-mir-3524b	permissive	no	NA	NA	NA	yes
gga-mir-3525	permissive	no	NA	NA	NA	yes
gga-mir-3526	permissive	no	NA	NA	NA	yes
gga-mir-3528	permissive	no	NA	NA	NA	yes
gga-mir-3529	permissive	no	NA	NA	NA	yes
gga-mir-3530	permissive	no	NA	NA	NA	yes
gga-mir-3531	permissive	no	NA	NA	NA	yes
gga-mir-3532	permissive	no	NA	NA	NA	yes
gga-mir-3533	permissive	no	NA	NA	NA	yes
gga-mir-3535	permissive	yes	no	no	yes	yes
gga-mir-3536	permissive	no	NA	NA	NA	yes
gga-mir-3537	permissive	no	NA	NA	NA	yes
gga-mir-3538	permissive	no	NA	NA	NA	yes
gga-mir-3539	permissive	no	NA	NA	NA	yes
gga-mir-3540	permissive	no	NA	NA	NA	yes
gga-mir-3607	permissive	no	NA	NA	NA	yes
gga-mir-4732	permissive	no	NA	NA	NA	yes
gga-mir-6516	permissive	no	NA	NA	NA	yes
gga-mir-6542	permissive	no	NA	NA	NA	yes
gga-mir-6544	permissive	no	NA	NA	NA	yes
gga-mir-6545	permissive	no	NA	NA	NA	yes
gga-mir-6546	permissive	no	NA	NA	NA	yes
gga-mir-6547	permissive	no	NA	NA	NA	yes
gga-mir-6548	permissive	no	NA	NA	NA	yes
gga-mir-6549	permissive	no	NA	NA	NA	yes
gga-mir-6550	permissive	no	NA	NA	NA	yes
gga-mir-6551	permissive	no	NA	NA	NA	yes
gga-mir-6552	permissive	no	NA	NA	NA	yes
gga-mir-6553	permissive	no	NA	NA	NA	yes
gga-mir-6554	permissive	no	NA	NA	NA	yes
gga-mir-6555	permissive	no	NA	NA	NA	yes
gga-mir-6556	permissive	no	NA	NA	NA	yes
gga-mir-6557	permissive	no	NA	NA	NA	yes
gga-mir-6558	permissive	no	NA	NA	NA	yes
gga-mir-6559	permissive	no	NA	NA	NA	yes
gga-mir-6560	permissive	no	NA	NA	NA	yes
gga-mir-6561	permissive	no	NA	NA	NA	yes
gga-mir-6563	permissive	no	NA	NA	NA	yes
gga-mir-6564	permissive	no	NA	NA	NA	yes
gga-mir-6565	permissive	no	NA	NA	NA	yes
gga-mir-6567	permissive	no	NA	NA	NA	yes
gga-mir-6568	permissive	no	NA	NA	NA	yes
gga-mir-6569	permissive	no	NA	NA	NA	yes
gga-mir-6570	permissive	no	NA	NA	NA	yes
gga-mir-6571	permissive	no	NA	NA	NA	yes
gga-mir-6572	permissive	no	NA	NA	NA	yes
gga-mir-6573	permissive	no	NA	NA	NA	yes
gga-mir-6574	permissive	no	NA	NA	NA	yes
gga-mir-6575	permissive	no	NA	NA	NA	yes
gga-mir-6576	permissive	no	NA	NA	NA	yes
gga-mir-6577	permissive	no	NA	NA	NA	yes
gga-mir-6578	permissive	no	NA	NA	NA	yes
gga-mir-6579-1	permissive	no	NA	NA	NA	yes
gga-mir-6579-2	permissive	no	NA	NA	NA	yes
gga-mir-6580	permissive	no	NA	NA	NA	yes
gga-mir-6581	permissive	no	NA	NA	NA	yes
gga-mir-6582	permissive	no	NA	NA	NA	yes
gga-mir-6583	permissive	no	NA	NA	NA	yes
gga-mir-6584	permissive	no	NA	NA	NA	yes
gga-mir-6585	permissive	no	NA	NA	NA	yes
gga-mir-6586	permissive	no	NA	NA	NA	yes
gga-mir-6587	permissive	no	NA	NA	NA	yes
gga-mir-6588	permissive	no	NA	NA	NA	yes
gga-mir-6589	permissive	no	NA	NA	NA	yes
gga-mir-6590	permissive	no	NA	NA	NA	yes
gga-mir-6591	permissive	no	NA	NA	NA	yes
gga-mir-6592	permissive	no	NA	NA	NA	yes
gga-mir-6594	permissive	no	NA	NA	NA	yes
gga-mir-6595	permissive	no	NA	NA	NA	yes
gga-mir-6596	permissive	no	NA	NA	NA	yes
gga-mir-6597	permissive	no	NA	NA	NA	yes
gga-mir-6598	permissive	no	NA	NA	NA	yes
gga-mir-6599	permissive	no	NA	NA	NA	yes
gga-mir-6600	permissive	no	NA	NA	NA	yes
gga-mir-6601	permissive	no	NA	NA	NA	yes
gga-mir-6602	permissive	no	NA	NA	NA	yes
gga-mir-6603	permissive	no	NA	NA	NA	yes
gga-mir-6604	permissive	no	NA	NA	NA	yes
gga-mir-6605	permissive	no	NA	NA	NA	yes
gga-mir-6606	permissive	no	NA	NA	NA	yes
gga-mir-6607	permissive	no	NA	NA	NA	yes
gga-mir-6608-1	permissive	no	NA	NA	NA	yes
gga-mir-6608-2	permissive	no	NA	NA	NA	yes
gga-mir-6609	permissive	no	NA	NA	NA	yes
gga-mir-6610	permissive	no	NA	NA	NA	yes
gga-mir-6611	permissive	no	NA	NA	NA	yes
gga-mir-6612	permissive	no	NA	NA	NA	yes
gga-mir-6613	permissive	no	NA	NA	NA	yes
gga-mir-6614	permissive	no	NA	NA	NA	yes
gga-mir-6615	permissive	no	NA	NA	NA	yes
gga-mir-6616	permissive	no	NA	NA	NA	yes
gga-mir-6617	permissive	no	NA	NA	NA	yes
gga-mir-6618	permissive	no	NA	NA	NA	yes
gga-mir-6620	permissive	no	NA	NA	NA	yes
gga-mir-6621	permissive	no	NA	NA	NA	yes
gga-mir-6622	permissive	no	NA	NA	NA	yes
gga-mir-6623	permissive	no	NA	NA	NA	yes
gga-mir-6624	permissive	no	NA	NA	NA	yes
gga-mir-6625	permissive	no	NA	NA	NA	yes
gga-mir-6626	permissive	no	NA	NA	NA	yes
gga-mir-6627	permissive	no	NA	NA	NA	yes
gga-mir-6628	permissive	no	NA	NA	NA	yes
gga-mir-6629	permissive	no	NA	NA	NA	yes
gga-mir-6630	permissive	no	NA	NA	NA	yes
gga-mir-6631	permissive	no	NA	NA	NA	yes
gga-mir-6632	permissive	no	NA	NA	NA	yes
gga-mir-6633	permissive	no	NA	NA	NA	yes
gga-mir-6634	permissive	no	NA	NA	NA	yes
gga-mir-6635-1	permissive	no	NA	NA	NA	yes
gga-mir-6637-1	permissive	no	NA	NA	NA	yes
gga-mir-6637-2	permissive	no	NA	NA	NA	yes
gga-mir-6639	permissive	no	NA	NA	NA	yes
gga-mir-6640	permissive	no	NA	NA	NA	yes
gga-mir-6641	permissive	no	NA	NA	NA	yes
gga-mir-6642	permissive	no	NA	NA	NA	yes
gga-mir-6643	permissive	no	NA	NA	NA	yes
gga-mir-6644-2	permissive	no	NA	NA	NA	yes
gga-mir-6645	permissive	no	NA	NA	NA	yes
gga-mir-6646-1	permissive	no	NA	NA	NA	yes
gga-mir-6647	permissive	no	NA	NA	NA	yes
gga-mir-6648-1	permissive	no	NA	NA	NA	yes
gga-mir-6649	permissive	no	NA	NA	NA	yes
gga-mir-6650	permissive	no	NA	NA	NA	yes
gga-mir-6651	permissive	no	NA	NA	NA	yes
gga-mir-6652	permissive	no	NA	NA	NA	yes
gga-mir-6653	permissive	no	NA	NA	NA	yes
gga-mir-6654	permissive	no	NA	NA	NA	yes
gga-mir-6655	permissive	no	NA	NA	NA	yes
gga-mir-6656	permissive	no	NA	NA	NA	yes
gga-mir-6657	permissive	no	NA	NA	NA	yes
gga-mir-6658	permissive	no	NA	NA	NA	yes
gga-mir-6659	permissive	no	NA	NA	NA	yes
gga-mir-6660	permissive	no	NA	NA	NA	yes
gga-mir-6661	permissive	no	NA	NA	NA	yes
gga-mir-6662	permissive	no	NA	NA	NA	yes
gga-mir-6663	permissive	no	NA	NA	NA	yes
gga-mir-6664	permissive	no	NA	NA	NA	yes
gga-mir-6665	permissive	no	NA	NA	NA	yes
gga-mir-6666	permissive	no	NA	NA	NA	yes
gga-mir-6667	permissive	no	NA	NA	NA	yes
gga-mir-6668	permissive	no	NA	NA	NA	yes
gga-mir-6669	permissive	no	NA	NA	NA	yes
gga-mir-6670	permissive	no	NA	NA	NA	yes
gga-mir-6671	permissive	no	NA	NA	NA	yes
gga-mir-6672	permissive	no	NA	NA	NA	yes
gga-mir-6673	permissive	no	NA	NA	NA	yes
gga-mir-6674	permissive	no	NA	NA	NA	yes
gga-mir-6675	permissive	no	NA	NA	NA	yes
gga-mir-6676	permissive	no	NA	NA	NA	yes
gga-mir-6677	permissive	no	NA	NA	NA	yes
gga-mir-6678	permissive	no	NA	NA	NA	yes
gga-mir-6679	permissive	no	NA	NA	NA	yes
gga-mir-6680	permissive	no	NA	NA	NA	yes
gga-mir-6681	permissive	no	NA	NA	NA	yes
gga-mir-6682	permissive	no	NA	NA	NA	yes
gga-mir-6683	permissive	no	NA	NA	NA	yes
gga-mir-6684	permissive	no	NA	NA	NA	yes
gga-mir-6685	permissive	no	NA	NA	NA	yes
gga-mir-6686	permissive	no	NA	NA	NA	yes
gga-mir-6687	permissive	no	NA	NA	NA	yes
gga-mir-6688	permissive	no	NA	NA	NA	yes
gga-mir-6689	permissive	no	NA	NA	NA	yes
gga-mir-6690	permissive	no	NA	NA	NA	yes
gga-mir-6691-1	permissive	no	NA	NA	NA	yes
gga-mir-6691-2	permissive	no	NA	NA	NA	yes
gga-mir-6692	permissive	no	NA	NA	NA	yes
gga-mir-6693	permissive	no	NA	NA	NA	yes
gga-mir-6694	permissive	no	NA	NA	NA	yes
gga-mir-6695	permissive	no	NA	NA	NA	yes
gga-mir-6696	permissive	no	NA	NA	NA	yes
gga-mir-6697	permissive	no	NA	NA	NA	yes
gga-mir-6698	permissive	no	NA	NA	NA	yes
gga-mir-6699	permissive	no	NA	NA	NA	yes
gga-mir-6700	permissive	no	NA	NA	NA	yes
gga-mir-6701	permissive	no	NA	NA	NA	yes
gga-mir-6702	permissive	no	NA	NA	NA	yes
gga-mir-6703	permissive	no	NA	NA	NA	yes
gga-mir-6704	permissive	no	NA	NA	NA	yes
gga-mir-6705	permissive	no	NA	NA	NA	yes
gga-mir-6706	permissive	no	NA	NA	NA	yes
gga-mir-6707	permissive	no	NA	NA	NA	yes
gga-mir-6708	permissive	no	NA	NA	NA	yes
gga-mir-6709	permissive	no	NA	NA	NA	yes
gga-mir-6710	permissive	no	NA	NA	NA	yes
gga-mir-6711	permissive	no	NA	NA	NA	yes
gga-mir-6712	permissive	no	NA	NA	NA	yes
gga-mir-6713	permissive	no	NA	NA	NA	yes
gga-mir-6714	permissive	no	NA	NA	NA	yes
gga-mir-7437	permissive	no	NA	NA	NA	yes
gga-mir-7438	permissive	no	NA	NA	NA	yes
gga-mir-7439	permissive	no	NA	NA	NA	yes
gga-mir-7440	permissive	no	NA	NA	NA	yes
gga-mir-7441	permissive	no	NA	NA	NA	yes
gga-mir-7442	permissive	no	NA	NA	NA	yes
gga-mir-7443	permissive	no	NA	NA	NA	yes
gga-mir-7444	permissive	no	NA	NA	NA	yes
gga-mir-7445-1	permissive	no	NA	NA	NA	yes
gga-mir-7445-2	permissive	no	NA	NA	NA	yes
gga-mir-7446	permissive	no	NA	NA	NA	yes
gga-mir-7447	permissive	no	NA	NA	NA	yes
gga-mir-7448	permissive	no	NA	NA	NA	yes
gga-mir-7449	permissive	no	NA	NA	NA	yes
gga-mir-7450	permissive	no	NA	NA	NA	yes
gga-mir-7451	permissive	no	NA	NA	NA	yes
gga-mir-7452	permissive	no	NA	NA	NA	yes
gga-mir-7453	permissive	no	NA	NA	NA	yes
gga-mir-7454	permissive	no	NA	NA	NA	yes
gga-mir-7456	permissive	no	NA	NA	NA	yes
gga-mir-7457	permissive	no	NA	NA	NA	yes
gga-mir-7458-1	permissive	no	NA	NA	NA	yes
gga-mir-7459	permissive	no	NA	NA	NA	yes
gga-mir-7460	permissive	no	NA	NA	NA	yes
gga-mir-7461	permissive	no	NA	NA	NA	yes
gga-mir-7462	permissive	no	NA	NA	NA	yes
gga-mir-7463	permissive	no	NA	NA	NA	yes
gga-mir-7464	permissive	no	NA	NA	NA	yes
gga-mir-7465	permissive	no	NA	NA	NA	yes
gga-mir-7466	permissive	no	NA	NA	NA	yes
gga-mir-7467	permissive	no	NA	NA	NA	yes
gga-mir-7468	permissive	no	NA	NA	NA	yes
gga-mir-7469	permissive	no	NA	NA	NA	yes
gga-mir-7471	permissive	no	NA	NA	NA	yes
gga-mir-7472	permissive	no	NA	NA	NA	yes
gga-mir-7473	permissive	no	NA	NA	NA	yes
gga-mir-7474	permissive	no	NA	NA	NA	yes
gga-mir-7476	permissive	no	NA	NA	NA	yes
gga-mir-7479-1	permissive	no	NA	NA	NA	yes
gga-mir-7479-2	permissive	no	NA	NA	NA	yes
gga-mir-7479-3	permissive	no	NA	NA	NA	yes
gga-mir-7481	permissive	no	NA	NA	NA	yes
gga-mir-7482-1	permissive	no	NA	NA	NA	yes
gga-mir-7482-2	permissive	no	NA	NA	NA	yes
gga-mir-7482-3	permissive	no	NA	NA	NA	yes
gga-mir-7482-4	permissive	no	NA	NA	NA	yes
gga-mir-7482-5	permissive	no	NA	NA	NA	yes
gga-mir-7483	permissive	no	NA	NA	NA	yes
gga-mir-12223	novel	yes	yes	yes	yes	yes
gga-mir-12229	novel	no	NA	NA	NA	yes
gga-mir-12243	novel	no	NA	NA	NA	yes
gga-mir-12247-1	novel	no	NA	NA	NA	yes
gga-mir-12267	novel	no	NA	NA	NA	yes
gga-novelmir-3	novel	no	NA	NA	NA	no
gga-novelmir-4	novel	no	NA	NA	NA	yes
gga-novelmir-5	novel	no	NA	NA	NA	yes
gga-novelmir-6	novel	no	NA	NA	NA	yes
gga-novelmir-7	novel	no	NA	NA	NA	yes
gga-novelmir-8	novel	no	NA	NA	NA	yes
gga-novelmir-10	novel	no	NA	NA	NA	yes
gga-novelmir-11	novel	no	NA	NA	NA	yes
gga-novelmir-12	novel	no	NA	NA	NA	yes
gga-novelmir-13	novel	no	NA	NA	NA	yes
gga-novelmir-14	novel	no	NA	NA	NA	yes
gga-novelmir-15	novel	no	NA	NA	NA	yes
gga-novelmir-22	novel	no	NA	NA	NA	yes
gga-novelmir-23	novel	no	NA	NA	NA	yes
gga-novelmir-24	novel	no	NA	NA	NA	yes
gga-novelmir-26	novel	no	NA	NA	NA	yes
gga-novelmir-27	novel	no	NA	NA	NA	yes
gga-novelmir-28	novel	no	NA	NA	NA	yes
gga-novelmir-31	novel	yes	yes	yes	yes	yes
gga-novelmir-32	novel	no	NA	NA	NA	yes
gga-novelmir-35	novel	no	NA	NA	NA	yes
gga-novelmir-38	novel	no	NA	NA	NA	yes
gga-novelmir-39	novel	no	NA	NA	NA	yes
gga-novelmir-43	novel	no	NA	NA	NA	yes
gga-novelmir-44	novel	no	NA	NA	NA	yes
gga-novelmir-45	novel	no	NA	NA	NA	yes
gga-novelmir-52	novel	no	NA	NA	NA	yes
