# Supplementary material for: Comparative transcriptomics of primary cells in vertebrates
Source: Genome Res. 2020 Jul;30(7):951–61. doi: 10.1101/gr.255679.119 (PMC7397866; doi:10.1101/gr.255679.119)
Supplement: Supplemental Material [file supp_gr.255679.119_Supplemental_Table_S10.xlsx]

## Sheet: README
Sheets TableS10c, TableS10d, TableS10e contain the genomic locations of candidate novel miRNAs predicted by miRDeep2 in rat (genome assembly rn6), dog (genome assembly canFam3), and chicken (genome assembly galGal5 and galGal6). For completeness, sheets TableS10a and TableS10b show the candidate novel miRNAs predicted previously (De Rie et al. 2017) for human (genome assembly hg19) and mouse (gen…

## Sheet: TableS10a
Candidate novel miRNAs in human
Type	Name	Chromosome (hg19)	Start (hg19)	End (hg19)	Strand (hg19)	Chromosome (hg38)	Start (hg38)	End (hg38)	Strand (hg38)
premiRNA	hsa-novelmir-1	chr1	877320	877382	+	chr1	+	941940	942002
miRNA	hsa-novelmiR-1-5p	chr1	877320	877340	+	chr1	+	941940	941960
miRNA	hsa-novelmiR-1-3p	chr1	877360	877382	+	chr1	+	941980	942002
premiRNA	hsa-novelmir-2	chr1	960214	960263	+	chr1	+	1024834	1024883
miRNA	hsa-novelmiR-2-5p	chr1	960214	960235	+	chr1	+	1024834	1024855
miRNA	hsa-novelmiR-2-3p	chr1	960243	960263	+	chr1	+	1024863	1024883
premiRNA	hsa-novelmir-3	chr1	1103258	1103316	-	chr1	-	1167878	1167936
miRNA	hsa-novelmiR-3-3p	chr1	1103258	1103277	-	chr1	-	1167878	1167897
miRNA	hsa-novelmiR-3-5p	chr1	1103294	1103316	-	chr1	-	1167914	1167936
premiRNA	hsa-novelmir-4	chr1	1140873	1140929	-	chr1	-	1205493	1205549
miRNA	hsa-novelmiR-4-3p	chr1	1140873	1140893	-	chr1	-	1205493	1205513
miRNA	hsa-novelmiR-4-5p	chr1	1140908	1140929	-	chr1	-	1205528	1205549
premiRNA	hsa-novelmir-5	chr1	1243862	1243936	+	chr1	+	1308482	1308556
miRNA	hsa-novelmiR-5-5p	chr1	1243862	1243882	+	chr1	+	1308482	1308502
miRNA	hsa-novelmiR-5-3p	chr1	1243918	1243936	+	chr1	+	1308538	1308556
premiRNA	hsa-novelmir-6	chr1	1284690	1284746	-	chr1	-	1349310	1349366
miRNA	hsa-novelmiR-6-3p	chr1	1284690	1284710	-	chr1	-	1349310	1349330
miRNA	hsa-novelmiR-6-5p	chr1	1284725	1284746	-	chr1	-	1349345	1349366
premiRNA	hsa-novelmir-7	chr1	1343317	1343391	+	chr1	+	1407937	1408011
miRNA	hsa-novelmiR-7-3p	chr1	1343371	1343391	+	chr1	+	1407991	1408011
miRNA	hsa-novelmiR-7-5p	chr1	1343317	1343338	+	chr1	+	1407937	1407958
premiRNA	hsa-novelmir-8	chr1	1370270	1370348	+	chr1	+	1434890	1434968
miRNA	hsa-novelmiR-8-5p	chr1	1370270	1370290	+	chr1	+	1434890	1434910
miRNA	hsa-novelmiR-8-3p	chr1	1370327	1370348	+	chr1	+	1434947	1434968
premiRNA	hsa-novelmir-9	chr1	1473068	1473138	-	chr1	-	1537688	1537758
miRNA	hsa-novelmiR-9-3p	chr1	1473068	1473086	-	chr1	-	1537688	1537706
miRNA	hsa-novelmiR-9-5p	chr1	1473123	1473138	-	chr1	-	1537743	1537758
premiRNA	hsa-novelmir-10	chr1	1475729	1475787	-	chr1	-	1540349	1540407
miRNA	hsa-novelmiR-10-3p	chr1	1475729	1475750	-	chr1	-	1540349	1540370
miRNA	hsa-novelmiR-10-5p	chr1	1475765	1475787	-	chr1	-	1540385	1540407
premiRNA	hsa-novelmir-11	chr1	1567487	1567548	+	chr1	+	1632108	1632169
miRNA	hsa-novelmiR-11-5p	chr1	1567487	1567506	+	chr1	+	1632108	1632127
miRNA	hsa-novelmiR-11-3p	chr1	1567529	1567548	+	chr1	+	1632150	1632169
premiRNA	hsa-novelmir-12	chr1	1571846	1571906	-	chr1	-	1636484	1636544
miRNA	hsa-novelmiR-12-3p	chr1	1571846	1571868	-	chr1	-	1636484	1636506
miRNA	hsa-novelmiR-12-5p	chr1	1571880	1571906	-	chr1	-	1636518	1636544
premiRNA	hsa-novelmir-13	chr1	1594732	1594789	-	chr1	-	1663272	1663329
miRNA	hsa-novelmiR-13-5p	chr1	1594768	1594789	-	chr1	-	1663308	1663329
miRNA	hsa-novelmiR-13-3p	chr1	1594732	1594753	-	chr1	-	1663272	1663293
premiRNA	hsa-novelmir-14	chr1	1594932	1595019	-	chr1	-	1663493	1663580
miRNA	hsa-novelmiR-14-5p	chr1	1594996	1595019	-	chr1	-	1663557	1663580
miRNA	hsa-novelmiR-14-3p	chr1	1594932	1594955	-	chr1	-	1663493	1663516
premiRNA	hsa-novelmir-15	chr1	1596430	1596512	-	chr1	-	1664991	1665073
miRNA	hsa-novelmiR-15-5p	chr1	1596493	1596512	-	chr1	-	1665054	1665073
miRNA	hsa-novelmiR-15-3p	chr1	1596430	1596447	-	chr1	-	1664991	1665008
premiRNA	hsa-novelmir-16	chr1	1596656	1596745	-	chr1	-	1665217	1665306
miRNA	hsa-novelmiR-16-3p	chr1	1596656	1596679	-	chr1	-	1665217	1665240
miRNA	hsa-novelmiR-16-5p	chr1	1596726	1596745	-	chr1	-	1665287	1665306
premiRNA	hsa-novelmir-17	chr1	1635066	1635126	-	chr1	-	1703627	1703687
miRNA	hsa-novelmiR-17-3p	chr1	1635066	1635088	-	chr1	-	1703627	1703649
miRNA	hsa-novelmiR-17-5p	chr1	1635100	1635126	-	chr1	-	1703661	1703687
premiRNA	hsa-novelmir-18	chr1	1660621	1660678	-	chr1	-	1729182	1729239
miRNA	hsa-novelmiR-18-5p	chr1	1660657	1660678	-	chr1	-	1729218	1729239
miRNA	hsa-novelmiR-18-3p	chr1	1660621	1660642	-	chr1	-	1729182	1729203
premiRNA	hsa-novelmir-19	chr1	2169888	2169953	+	chr1	+	2238449	2238514
miRNA	hsa-novelmiR-19-5p	chr1	2169888	2169911	+	chr1	+	2238449	2238472
miRNA	hsa-novelmiR-19-3p	chr1	2169929	2169953	+	chr1	+	2238490	2238514
premiRNA	hsa-novelmir-20	chr1	2203646	2203690	+	chr1	+	2272207	2272251
miRNA	hsa-novelmiR-20-3p	chr1	2203668	2203690	+	chr1	+	2272229	2272251
miRNA	hsa-novelmiR-20-5p	chr1	2203646	2203665	+	chr1	+	2272207	2272226
premiRNA	hsa-novelmir-21	chr1	2215228	2215299	+	chr1	+	2283789	2283860
miRNA	hsa-novelmiR-21-5p	chr1	2215228	2215246	+	chr1	+	2283789	2283807
miRNA	hsa-novelmiR-21-3p	chr1	2215281	2215299	+	chr1	+	2283842	2283860
premiRNA	hsa-novelmir-22	chr1	2228500	2228543	+	chr1	+	2297061	2297104
miRNA	hsa-novelmiR-22-5p	chr1	2228500	2228521	+	chr1	+	2297061	2297082
miRNA	hsa-novelmiR-22-3p	chr1	2228523	2228543	+	chr1	+	2297084	2297104
premiRNA	hsa-novelmir-23	chr1	2347071	2347118	+	chr1	+	2415632	2415679
miRNA	hsa-novelmiR-23-5p	chr1	2347071	2347092	+	chr1	+	2415632	2415653
miRNA	hsa-novelmiR-23-3p	chr1	2347098	2347118	+	chr1	+	2415659	2415679
premiRNA	hsa-novelmir-24	chr1	2442964	2443023	-	chr1	-	2511525	2511584
miRNA	hsa-novelmiR-24-5p	chr1	2443002	2443023	-	chr1	-	2511563	2511584
miRNA	hsa-novelmiR-24-3p	chr1	2442964	2442985	-	chr1	-	2511525	2511546
premiRNA	hsa-novelmir-25	chr1	2444512	2444598	-	chr1	-	2513073	2513159
miRNA	hsa-novelmiR-25-3p	chr1	2444512	2444534	-	chr1	-	2513073	2513095
miRNA	hsa-novelmiR-25-5p	chr1	2444576	2444598	-	chr1	-	2513137	2513159
premiRNA	hsa-novelmir-26	chr1	2461382	2461451	-	chr1	-	2529943	2530012
miRNA	hsa-novelmiR-26-3p	chr1	2461382	2461399	-	chr1	-	2529943	2529960
miRNA	hsa-novelmiR-26-5p	chr1	2461435	2461451	-	chr1	-	2529996	2530012
premiRNA	hsa-novelmir-27	chr1	2509630	2509691	-	chr1	-	2578191	2578252
miRNA	hsa-novelmiR-27-5p	chr1	2509671	2509691	-	chr1	-	2578232	2578252
miRNA	hsa-novelmiR-27-3p	chr1	2509630	2509648	-	chr1	-	2578191	2578209
premiRNA	hsa-novelmir-28	chr1	2514657	2514712	-	chr1	-	2583218	2583273
miRNA	hsa-novelmiR-28-5p	chr1	2514689	2514712	-	chr1	-	2583250	2583273
miRNA	hsa-novelmiR-28-3p	chr1	2514657	2514678	-	chr1	-	2583218	2583239
premiRNA	hsa-novelmir-29	chr1	3373093	3373150	+	chr1	+	3456529	3456586
miRNA	hsa-novelmiR-29-3p	chr1	3373133	3373150	+	chr1	+	3456569	3456586
miRNA	hsa-novelmiR-29-5p	chr1	3373093	3373110	+	chr1	+	3456529	3456546
premiRNA	hsa-novelmir-30	chr1	3547230	3547293	+	chr1	+	3630666	3630729
miRNA	hsa-novelmiR-30-5p	chr1	3547230	3547247	+	chr1	+	3630666	3630683
miRNA	hsa-novelmiR-30-3p	chr1	3547272	3547293	+	chr1	+	3630708	3630729
premiRNA	hsa-novelmir-31	chr1	3655170	3655223	-	chr1	-	3738606	3738659
miRNA	hsa-novelmiR-31-3p	chr1	3655170	3655191	-	chr1	-	3738606	3738627
miRNA	hsa-novelmiR-31-5p	chr1	3655203	3655223	-	chr1	-	3738639	3738659
premiRNA	hsa-novelmir-32	chr1	3816323	3816392	-	chr1	-	3899759	3899828
miRNA	hsa-novelmiR-32-5p	chr1	3816373	3816392	-	chr1	-	3899809	3899828
miRNA	hsa-novelmiR-32-3p	chr1	3816323	3816344	-	chr1	-	3899759	3899780
premiRNA	hsa-novelmir-33	chr1	6245812	6245870	-	chr1	-	6185752	6185810
miRNA	hsa-novelmiR-33-3p	chr1	6245812	6245829	-	chr1	-	6185752	6185769
miRNA	hsa-novelmiR-33-5p	chr1	6245852	6245870	-	chr1	-	6185792	6185810
premiRNA	hsa-novelmir-34	chr1	6266505	6266592	+	chr1	+	6206445	6206532
miRNA	hsa-novelmiR-34-3p	chr1	6266571	6266592	+	chr1	+	6206511	6206532
miRNA	hsa-novelmiR-34-5p	chr1	6266505	6266527	+	chr1	+	6206445	6206467
premiRNA	hsa-novelmir-35	chr1	6270481	6270544	+	chr1	+	6210421	6210484
miRNA	hsa-novelmiR-35-5p	chr1	6270481	6270498	+	chr1	+	6210421	6210438
miRNA	hsa-novelmiR-35-3p	chr1	6270530	6270544	+	chr1	+	6210470	6210484
premiRNA	hsa-novelmir-36	chr1	6350842	6350896	+	chr1	+	6290782	6290836
miRNA	hsa-novelmiR-36-3p	chr1	6350876	6350896	+	chr1	+	6290816	6290836
miRNA	hsa-novelmiR-36-5p	chr1	6350842	6350863	+	chr1	+	6290782	6290803
premiRNA	hsa-novelmir-37	chr1	6384452	6384516	-	chr1	-	6324392	6324456
miRNA	hsa-novelmiR-37-5p	chr1	6384495	6384516	-	chr1	-	6324435	6324456
miRNA	hsa-novelmiR-37-3p	chr1	6384452	6384473	-	chr1	-	6324392	6324413
premiRNA	hsa-novelmir-38	chr1	6419863	6419916	-	chr1	-	6359803	6359856
miRNA	hsa-novelmiR-38-3p	chr1	6419863	6419883	-	chr1	-	6359803	6359823
miRNA	hsa-novelmiR-38-5p	chr1	6419895	6419916	-	chr1	-	6359835	6359856
premiRNA	hsa-novelmir-39	chr1	6552075	6552162	+	chr1	+	6492015	6492102
miRNA	hsa-novelmiR-39-5p	chr1	6552075	6552098	+	chr1	+	6492015	6492038
miRNA	hsa-novelmiR-39-3p	chr1	6552139	6552162	+	chr1	+	6492079	6492102
premiRNA	hsa-novelmir-40	chr1	6653248	6653320	-	chr1	-	6593188	6593260
miRNA	hsa-novelmiR-40-3p	chr1	6653248	6653270	-	chr1	-	6593188	6593210
miRNA	hsa-novelmiR-40-5p	chr1	6653298	6653320	-	chr1	-	6593238	6593260
premiRNA	hsa-novelmir-41	chr1	6685401	6685458	+	chr1	+	6625341	6625398
miRNA	hsa-novelmiR-41-5p	chr1	6685401	6685423	+	chr1	+	6625341	6625363
miRNA	hsa-novelmiR-41-3p	chr1	6685434	6685458	+	chr1	+	6625374	6625398
premiRNA	hsa-novelmir-42	chr1	6686289	6686350	+	chr1	+	6626229	6626290
miRNA	hsa-novelmiR-42-5p	chr1	6686289	6686307	+	chr1	+	6626229	6626247
miRNA	hsa-novelmiR-42-3p	chr1	6686332	6686350	+	chr1	+	6626272	6626290
premiRNA	hsa-novelmir-43	chr1	6686533	6686619	+	chr1	+	6626473	6626559
miRNA	hsa-novelmiR-43-3p	chr1	6686597	6686619	+	chr1	+	6626537	6626559
miRNA	hsa-novelmiR-43-5p	chr1	6686533	6686553	+	chr1	+	6626473	6626493
premiRNA	hsa-novelmir-44	chr1	6707167	6707249	-	chr1	-	6647107	6647189
miRNA	hsa-novelmiR-44-3p	chr1	6707167	6707184	-	chr1	-	6647107	6647124
miRNA	hsa-novelmiR-44-5p	chr1	6707230	6707249	-	chr1	-	6647170	6647189
premiRNA	hsa-novelmir-45	chr1	8261663	8261717	+	chr1	+	8201603	8201657
miRNA	hsa-novelmiR-45-3p	chr1	8261700	8261717	+	chr1	+	8201640	8201657
miRNA	hsa-novelmiR-45-5p	chr1	8261663	8261679	+	chr1	+	8201603	8201619
premiRNA	hsa-novelmir-46	chr1	8278016	8278075	+	chr1	+	8217956	8218015
miRNA	hsa-novelmiR-46-3p	chr1	8278052	8278075	+	chr1	+	8217992	8218015
miRNA	hsa-novelmiR-46-5p	chr1	8278016	8278035	+	chr1	+	8217956	8217975
premiRNA	hsa-novelmir-47	chr1	9222833	9222920	-	chr1	-	9162774	9162861
miRNA	hsa-novelmiR-47-5p	chr1	9222899	9222920	-	chr1	-	9162840	9162861
miRNA	hsa-novelmiR-47-3p	chr1	9222833	9222855	-	chr1	-	9162774	9162796
premiRNA	hsa-novelmir-48	chr1	9250720	9250761	+	chr1	+	9190661	9190702
miRNA	hsa-novelmiR-48-3p	chr1	9250744	9250761	+	chr1	+	9190685	9190702
miRNA	hsa-novelmiR-48-5p	chr1	9250720	9250735	+	chr1	+	9190661	9190676
premiRNA	hsa-novelmir-49	chr1	9261059	9261118	-	chr1	-	9201000	9201059
miRNA	hsa-novelmiR-49-5p	chr1	9261096	9261118	-	chr1	-	9201037	9201059
miRNA	hsa-novelmiR-49-3p	chr1	9261059	9261080	-	chr1	-	9201000	9201021
premiRNA	hsa-novelmir-50	chr1	9305016	9305072	+	chr1	+	9244957	9245013
miRNA	hsa-novelmiR-50-3p	chr1	9305051	9305072	+	chr1	+	9244992	9245013
miRNA	hsa-novelmiR-50-5p	chr1	9305016	9305036	+	chr1	+	9244957	9244977
premiRNA	hsa-novelmir-51	chr1	9371352	9371414	+	chr1	+	9311293	9311355
miRNA	hsa-novelmiR-51-3p	chr1	9371393	9371414	+	chr1	+	9311334	9311355
miRNA	hsa-novelmiR-51-5p	chr1	9371352	9371375	+	chr1	+	9311293	9311316
premiRNA	hsa-novelmir-52	chr1	9443195	9443248	-	chr1	-	9383136	9383189
miRNA	hsa-novelmiR-52-5p	chr1	9443227	9443248	-	chr1	-	9383168	9383189
miRNA	hsa-novelmiR-52-3p	chr1	9443195	9443213	-	chr1	-	9383136	9383154
premiRNA	hsa-novelmir-53	chr1	9673862	9673925	+	chr1	+	9613804	9613867
miRNA	hsa-novelmiR-53-3p	chr1	9673904	9673925	+	chr1	+	9613846	9613867
miRNA	hsa-novelmiR-53-5p	chr1	9673862	9673883	+	chr1	+	9613804	9613825
premiRNA	hsa-novelmir-54	chr1	9712994	9713059	+	chr1	+	9652936	9653001
miRNA	hsa-novelmiR-54-3p	chr1	9713041	9713059	+	chr1	+	9652983	9653001
miRNA	hsa-novelmiR-54-5p	chr1	9712994	9713010	+	chr1	+	9652936	9652952
premiRNA	hsa-novelmir-55	chr1	9750139	9750184	+	chr1	+	9690081	9690126
miRNA	hsa-novelmiR-55-5p	chr1	9750139	9750156	+	chr1	+	9690081	9690098
miRNA	hsa-novelmiR-55-3p	chr1	9750163	9750184	+	chr1	+	9690105	9690126
premiRNA	hsa-novelmir-56	chr1	9778409	9778466	+	chr1	+	9718351	9718408
miRNA	hsa-novelmiR-56-5p	chr1	9778409	9778431	+	chr1	+	9718351	9718373
miRNA	hsa-novelmiR-56-3p	chr1	9778445	9778466	+	chr1	+	9718387	9718408
premiRNA	hsa-novelmir-57	chr1	9780725	9780798	+	chr1	+	9720667	9720740
miRNA	hsa-novelmiR-57-3p	chr1	9780777	9780798	+	chr1	+	9720719	9720740
miRNA	hsa-novelmiR-57-5p	chr1	9780725	9780747	+	chr1	+	9720667	9720689
premiRNA	hsa-novelmir-58	chr1	9786191	9786254	+	chr1	+	9726133	9726196
miRNA	hsa-novelmiR-58-5p	chr1	9786191	9786211	+	chr1	+	9726133	9726153
miRNA	hsa-novelmiR-58-3p	chr1	9786236	9786254	+	chr1	+	9726178	9726196
premiRNA	hsa-novelmir-59	chr1	9885960	9886037	+	chr1	+	9825902	9825979
miRNA	hsa-novelmiR-59-3p	chr1	9886018	9886037	+	chr1	+	9825960	9825979
miRNA	hsa-novelmiR-59-5p	chr1	9885960	9885982	+	chr1	+	9825902	9825924
premiRNA	hsa-novelmir-60	chr1	9886184	9886240	-	chr1	-	9826126	9826182
miRNA	hsa-novelmiR-60-5p	chr1	9886219	9886240	-	chr1	-	9826161	9826182
miRNA	hsa-novelmiR-60-3p	chr1	9886184	9886204	-	chr1	-	9826126	9826146
premiRNA	hsa-novelmir-61	chr1	10571701	10571762	+	chr1	+	10511644	10511705
miRNA	hsa-novelmiR-61-3p	chr1	10571742	10571762	+	chr1	+	10511685	10511705
miRNA	hsa-novelmiR-61-5p	chr1	10571701	10571723	+	chr1	+	10511644	10511666
premiRNA	hsa-novelmir-62	chr1	11091713	11091782	+	chr1	+	11031656	11031725
miRNA	hsa-novelmiR-62-5p	chr1	11091713	11091730	+	chr1	+	11031656	11031673
miRNA	hsa-novelmiR-62-3p	chr1	11091762	11091782	+	chr1	+	11031705	11031725
premiRNA	hsa-novelmir-63	chr1	11107351	11107424	-	chr1	-	11047294	11047367
miRNA	hsa-novelmiR-63-5p	chr1	11107400	11107424	-	chr1	-	11047343	11047367
miRNA	hsa-novelmiR-63-3p	chr1	11107351	11107374	-	chr1	-	11047294	11047317
premiRNA	hsa-novelmir-64	chr1	11112964	11113022	-	chr1	-	11052907	11052965
miRNA	hsa-novelmiR-64-3p	chr1	11112964	11112988	-	chr1	-	11052907	11052931
miRNA	hsa-novelmiR-64-5p	chr1	11113001	11113022	-	chr1	-	11052944	11052965
premiRNA	hsa-novelmir-65	chr1	11119715	11119748	-	chr1	-	11059658	11059691
miRNA	hsa-novelmiR-65-5p	chr1	11119731	11119748	-	chr1	-	11059674	11059691
miRNA	hsa-novelmiR-65-3p	chr1	11119715	11119729	-	chr1	-	11059658	11059672
premiRNA	hsa-novelmir-66	chr1	11160800	11160866	+	chr1	+	11100743	11100809
miRNA	hsa-novelmiR-66-3p	chr1	11160844	11160866	+	chr1	+	11100787	11100809
miRNA	hsa-novelmiR-66-5p	chr1	11160800	11160821	+	chr1	+	11100743	11100764
premiRNA	hsa-novelmir-67	chr1	11341005	11341070	+	chr1	+	11280948	11281013
miRNA	hsa-novelmiR-67-5p	chr1	11341005	11341024	+	chr1	+	11280948	11280967
miRNA	hsa-novelmiR-67-3p	chr1	11341046	11341070	+	chr1	+	11280989	11281013
premiRNA	hsa-novelmir-68	chr1	11450039	11450122	-	chr1	-	11389982	11390065
miRNA	hsa-novelmiR-68-5p	chr1	11450101	11450122	-	chr1	-	11390044	11390065
miRNA	hsa-novelmiR-68-3p	chr1	11450039	11450060	-	chr1	-	11389982	11390003
premiRNA	hsa-novelmir-69	chr1	11702320	11702355	-	chr1	-	11642263	11642298
miRNA	hsa-novelmiR-69-3p	chr1	11702320	11702337	-	chr1	-	11642263	11642280
miRNA	hsa-novelmiR-69-5p	chr1	11702339	11702355	-	chr1	-	11642282	11642298
premiRNA	hsa-novelmir-70	chr1	11751787	11751865	-	chr1	-	11691730	11691808
miRNA	hsa-novelmiR-70-3p	chr1	11751787	11751806	-	chr1	-	11691730	11691749
miRNA	hsa-novelmiR-70-5p	chr1	11751848	11751865	-	chr1	-	11691791	11691808
premiRNA	hsa-novelmir-71	chr1	11754233	11754283	+	chr1	+	11694176	11694226
miRNA	hsa-novelmiR-71-3p	chr1	11754263	11754283	+	chr1	+	11694206	11694226
miRNA	hsa-novelmiR-71-5p	chr1	11754233	11754254	+	chr1	+	11694176	11694197
premiRNA	hsa-novelmir-72	chr1	11785251	11785314	+	chr1	+	11725194	11725257
miRNA	hsa-novelmiR-72-5p	chr1	11785251	11785274	+	chr1	+	11725194	11725217
miRNA	hsa-novelmiR-72-3p	chr1	11785294	11785314	+	chr1	+	11725237	11725257
premiRNA	hsa-novelmir-73	chr1	12148440	12148524	+	chr1	+	12088383	12088467
miRNA	hsa-novelmiR-73-3p	chr1	12148502	12148524	+	chr1	+	12088445	12088467
miRNA	hsa-novelmiR-73-5p	chr1	12148440	12148462	+	chr1	+	12088383	12088405
premiRNA	hsa-novelmir-74	chr1	12239252	12239303	-	chr1	-	12179195	12179246
miRNA	hsa-novelmiR-74-3p	chr1	12239252	12239271	-	chr1	-	12179195	12179214
miRNA	hsa-novelmiR-74-5p	chr1	12239284	12239303	-	chr1	-	12179227	12179246
premiRNA	hsa-novelmir-75	chr1	12530348	12530393	-	chr1	-	12470293	12470338
miRNA	hsa-novelmiR-75-3p	chr1	12530348	12530366	-	chr1	-	12470293	12470311
miRNA	hsa-novelmiR-75-5p	chr1	12530375	12530393	-	chr1	-	12470320	12470338
premiRNA	hsa-novelmir-76	chr1	12600036	12600101	-	chr1	-	12540010	12540075
miRNA	hsa-novelmiR-76-5p	chr1	12600081	12600101	-	chr1	-	12540055	12540075
miRNA	hsa-novelmiR-76-3p	chr1	12600036	12600057	-	chr1	-	12540010	12540031
premiRNA	hsa-novelmir-77	chr1	12601943	12602003	+	chr1	+	12541917	12541977
miRNA	hsa-novelmiR-77-3p	chr1	12601982	12602003	+	chr1	+	12541956	12541977
miRNA	hsa-novelmiR-77-5p	chr1	12601943	12601966	+	chr1	+	12541917	12541940
premiRNA	hsa-novelmir-78	chr1	12647945	12648008	-	chr1	-	12587930	12587993
miRNA	hsa-novelmiR-78-5p	chr1	12647986	12648008	-	chr1	-	12587971	12587993
miRNA	hsa-novelmiR-78-3p	chr1	12647945	12647968	-	chr1	-	12587930	12587953
premiRNA	hsa-novelmir-79	chr1	12663141	12663190	-	chr1	-	12603136	12603185
miRNA	hsa-novelmiR-79-3p	chr1	12663141	12663164	-	chr1	-	12603136	12603159
miRNA	hsa-novelmiR-79-5p	chr1	12663167	12663190	-	chr1	-	12603162	12603185
premiRNA	hsa-novelmir-80	chr1	12784930	12785016	+	chr1	+	12724963	12725049
miRNA	hsa-novelmiR-80-3p	chr1	12784992	12785016	+	chr1	+	12725025	12725049
miRNA	hsa-novelmiR-80-5p	chr1	12784930	12784954	+	chr1	+	12724963	12724987
premiRNA	hsa-novelmir-81	chr1	13946761	13946803	+	chr1	+	13620266	13620308
miRNA	hsa-novelmiR-81-3p	chr1	13946784	13946803	+	chr1	+	13620289	13620308
miRNA	hsa-novelmiR-81-5p	chr1	13946761	13946778	+	chr1	+	13620266	13620283
premiRNA	hsa-novelmir-82	chr1	16029613	16029688	+	chr1	+	15703118	15703193
miRNA	hsa-novelmiR-82-3p	chr1	16029671	16029688	+	chr1	+	15703176	15703193
miRNA	hsa-novelmiR-82-5p	chr1	16029613	16029629	+	chr1	+	15703118	15703134
premiRNA	hsa-novelmir-83	chr1	16071127	16071188	-	chr1	-	15744632	15744693
miRNA	hsa-novelmiR-83-5p	chr1	16071166	16071188	-	chr1	-	15744671	15744693
miRNA	hsa-novelmiR-83-3p	chr1	16071127	16071148	-	chr1	-	15744632	15744653
premiRNA	hsa-novelmir-84	chr1	16093958	16094032	+	chr1	+	15767463	15767537
miRNA	hsa-novelmiR-84-3p	chr1	16094009	16094032	+	chr1	+	15767514	15767537
miRNA	hsa-novelmiR-84-5p	chr1	16093958	16093976	+	chr1	+	15767463	15767481
premiRNA	hsa-novelmir-85	chr1	16188236	16188292	+	chr1	+	15861741	15861797
miRNA	hsa-novelmiR-85-5p	chr1	16188236	16188257	+	chr1	+	15861741	15861762
miRNA	hsa-novelmiR-85-3p	chr1	16188271	16188292	+	chr1	+	15861776	15861797
premiRNA	hsa-novelmir-86	chr1	16455273	16455336	-	chr1	-	16128778	16128841
miRNA	hsa-novelmiR-86-5p	chr1	16455316	16455336	-	chr1	-	16128821	16128841
miRNA	hsa-novelmiR-86-3p	chr1	16455273	16455293	-	chr1	-	16128778	16128798
premiRNA	hsa-novelmir-87	chr1	16803571	16803628	-	chr1	-	16477076	16477133
miRNA	hsa-novelmiR-87-5p	chr1	16803605	16803628	-	chr1	-	16477110	16477133
miRNA	hsa-novelmiR-87-3p	chr1	16803571	16803590	-	chr1	-	16477076	16477095
premiRNA	hsa-novelmir-88	chr1	16875421	16875475	+	chr1	+	16548926	16548980
miRNA	hsa-novelmiR-88-5p	chr1	16875421	16875441	+	chr1	+	16548926	16548946
miRNA	hsa-novelmiR-88-3p	chr1	16875454	16875475	+	chr1	+	16548959	16548980
premiRNA	hsa-novelmir-89	chr1	17007762	17007816	+	chr1	+	16681267	16681321
miRNA	hsa-novelmiR-89-5p	chr1	17007762	17007782	+	chr1	+	16681267	16681287
miRNA	hsa-novelmiR-89-3p	chr1	17007795	17007816	+	chr1	+	16681300	16681321
premiRNA	hsa-novelmir-90	chr1	17223264	17223331	+	chr1	+	16896769	16896836
miRNA	hsa-novelmiR-90-3p	chr1	17223310	17223331	+	chr1	+	16896815	16896836
miRNA	hsa-novelmiR-90-5p	chr1	17223264	17223281	+	chr1	+	16896769	16896786
premiRNA	hsa-novelmir-91	chr1	17256757	17256841	+	chr1	+	16930262	16930346
miRNA	hsa-novelmiR-91-5p	chr1	17256757	17256780	+	chr1	+	16930262	16930285
miRNA	hsa-novelmiR-91-3p	chr1	17256820	17256841	+	chr1	+	16930325	16930346
premiRNA	hsa-novelmir-92	chr1	17745465	17745532	-	chr1	-	17418969	17419036
miRNA	hsa-novelmiR-92-3p	chr1	17745465	17745484	-	chr1	-	17418969	17418988
miRNA	hsa-novelmiR-92-5p	chr1	17745516	17745532	-	chr1	-	17419020	17419036
premiRNA	hsa-novelmir-93	chr1	17758846	17758909	-	chr1	-	17432350	17432413
miRNA	hsa-novelmiR-93-5p	chr1	17758890	17758909	-	chr1	-	17432394	17432413
miRNA	hsa-novelmiR-93-3p	chr1	17758846	17758861	-	chr1	-	17432350	17432365
premiRNA	hsa-novelmir-94	chr1	17886198	17886265	-	chr1	-	17559703	17559770
miRNA	hsa-novelmiR-94-5p	chr1	17886246	17886265	-	chr1	-	17559751	17559770
miRNA	hsa-novelmiR-94-3p	chr1	17886198	17886214	-	chr1	-	17559703	17559719
premiRNA	hsa-novelmir-95	chr1	17937151	17937206	+	chr1	+	17610656	17610711
miRNA	hsa-novelmiR-95-5p	chr1	17937151	17937172	+	chr1	+	17610656	17610677
miRNA	hsa-novelmiR-95-3p	chr1	17937187	17937206	+	chr1	+	17610692	17610711
premiRNA	hsa-novelmir-96	chr1	17945649	17945730	+	chr1	+	17619154	17619235
miRNA	hsa-novelmiR-96-5p	chr1	17945649	17945672	+	chr1	+	17619154	17619177
miRNA	hsa-novelmiR-96-3p	chr1	17945708	17945730	+	chr1	+	17619213	17619235
premiRNA	hsa-novelmir-97	chr1	17954861	17954920	+	chr1	+	17628366	17628425
miRNA	hsa-novelmiR-97-5p	chr1	17954861	17954882	+	chr1	+	17628366	17628387
miRNA	hsa-novelmiR-97-3p	chr1	17954899	17954920	+	chr1	+	17628404	17628425
premiRNA	hsa-novelmir-98	chr1	19395152	19395213	-	chr1	-	19068658	19068719
miRNA	hsa-novelmiR-98-3p	chr1	19395152	19395173	-	chr1	-	19068658	19068679
miRNA	hsa-novelmiR-98-5p	chr1	19395189	19395213	-	chr1	-	19068695	19068719
premiRNA	hsa-novelmir-99	chr1	19414347	19414410	-	chr1	-	19087853	19087916
miRNA	hsa-novelmiR-99-3p	chr1	19414347	19414371	-	chr1	-	19087853	19087877
miRNA	hsa-novelmiR-99-5p	chr1	19414391	19414410	-	chr1	-	19087897	19087916
premiRNA	hsa-novelmir-100	chr1	19477148	19477222	-	chr1	-	19150654	19150728
miRNA	hsa-novelmiR-100-5p	chr1	19477202	19477222	-	chr1	-	19150708	19150728
miRNA	hsa-novelmiR-100-3p	chr1	19477148	19477168	-	chr1	-	19150654	19150674
premiRNA	hsa-novelmir-101	chr1	19568293	19568346	-	chr1	-	19241799	19241852
miRNA	hsa-novelmiR-101-3p	chr1	19568293	19568314	-	chr1	-	19241799	19241820
miRNA	hsa-novelmiR-101-5p	chr1	19568326	19568346	-	chr1	-	19241832	19241852
premiRNA	hsa-novelmir-102	chr1	19656392	19656450	+	chr1	+	19329898	19329956
miRNA	hsa-novelmiR-102-3p	chr1	19656428	19656450	+	chr1	+	19329934	19329956
miRNA	hsa-novelmiR-102-5p	chr1	19656392	19656415	+	chr1	+	19329898	19329921
premiRNA	hsa-novelmir-103	chr1	20234918	20234975	+	chr1	+	19908425	19908482
miRNA	hsa-novelmiR-103-5p	chr1	20234918	20234941	+	chr1	+	19908425	19908448
miRNA	hsa-novelmiR-103-3p	chr1	20234953	20234975	+	chr1	+	19908460	19908482
premiRNA	hsa-novelmir-104	chr1	20236917	20237006	+	chr1	+	19910424	19910513
miRNA	hsa-novelmiR-104-3p	chr1	20236985	20237006	+	chr1	+	19910492	19910513
miRNA	hsa-novelmiR-104-5p	chr1	20236917	20236939	+	chr1	+	19910424	19910446
premiRNA	hsa-novelmir-105	chr1	20534096	20534154	+	chr1	+	20207603	20207661
miRNA	hsa-novelmiR-105-5p	chr1	20534096	20534117	+	chr1	+	20207603	20207624
miRNA	hsa-novelmiR-105-3p	chr1	20534133	20534154	+	chr1	+	20207640	20207661
premiRNA	hsa-novelmir-106	chr1	20812043	20812110	-	chr1	-	20485550	20485617
miRNA	hsa-novelmiR-106-3p	chr1	20812043	20812064	-	chr1	-	20485550	20485571
miRNA	hsa-novelmiR-106-5p	chr1	20812089	20812110	-	chr1	-	20485596	20485617
premiRNA	hsa-novelmir-107	chr1	20960105	20960167	+	chr1	+	20633612	20633674
miRNA	hsa-novelmiR-107-5p	chr1	20960105	20960123	+	chr1	+	20633612	20633630
miRNA	hsa-novelmiR-107-3p	chr1	20960148	20960167	+	chr1	+	20633655	20633674
premiRNA	hsa-novelmir-108	chr1	21503783	21503854	+	chr1	+	21177290	21177361
miRNA	hsa-novelmiR-108-3p	chr1	21503830	21503854	+	chr1	+	21177337	21177361
miRNA	hsa-novelmiR-108-5p	chr1	21503783	21503802	+	chr1	+	21177290	21177309
premiRNA	hsa-novelmir-109	chr1	21640749	21640808	+	chr1	+	21314256	21314315
miRNA	hsa-novelmiR-109-3p	chr1	21640787	21640808	+	chr1	+	21314294	21314315
miRNA	hsa-novelmiR-109-5p	chr1	21640749	21640770	+	chr1	+	21314256	21314277
premiRNA	hsa-novelmir-110	chr1	21656356	21656402	+	chr1	+	21329863	21329909
miRNA	hsa-novelmiR-110-5p	chr1	21656356	21656376	+	chr1	+	21329863	21329883
miRNA	hsa-novelmiR-110-3p	chr1	21656382	21656402	+	chr1	+	21329889	21329909
premiRNA	hsa-novelmir-111	chr1	22010305	22010354	-	chr1	-	21683812	21683861
miRNA	hsa-novelmiR-111-3p	chr1	22010305	22010329	-	chr1	-	21683812	21683836
miRNA	hsa-novelmiR-111-5p	chr1	22010332	22010354	-	chr1	-	21683839	21683861
premiRNA	hsa-novelmir-112	chr1	22178809	22178872	-	chr1	-	21852316	21852379
miRNA	hsa-novelmiR-112-3p	chr1	22178809	22178830	-	chr1	-	21852316	21852337
miRNA	hsa-novelmiR-112-5p	chr1	22178851	22178872	-	chr1	-	21852358	21852379
premiRNA	hsa-novelmir-113	chr1	22191573	22191638	-	chr1	-	21865080	21865145
miRNA	hsa-novelmiR-113-5p	chr1	22191615	22191638	-	chr1	-	21865122	21865145
miRNA	hsa-novelmiR-113-3p	chr1	22191573	22191596	-	chr1	-	21865080	21865103
premiRNA	hsa-novelmir-114	chr1	22233542	22233609	-	chr1	-	21907049	21907116
miRNA	hsa-novelmiR-114-5p	chr1	22233585	22233609	-	chr1	-	21907092	21907116
miRNA	hsa-novelmiR-114-3p	chr1	22233542	22233566	-	chr1	-	21907049	21907073
premiRNA	hsa-novelmir-115	chr1	22246784	22246849	-	chr1	-	21920291	21920356
miRNA	hsa-novelmiR-115-3p	chr1	22246784	22246807	-	chr1	-	21920291	21920314
miRNA	hsa-novelmiR-115-5p	chr1	22246825	22246849	-	chr1	-	21920332	21920356
premiRNA	hsa-novelmir-116	chr1	22440704	22440779	+	chr1	+	22114211	22114286
miRNA	hsa-novelmiR-116-5p	chr1	22440704	22440725	+	chr1	+	22114211	22114232
miRNA	hsa-novelmiR-116-3p	chr1	22440756	22440779	+	chr1	+	22114263	22114286
premiRNA	hsa-novelmir-117	chr1	22582258	22582310	-	chr1	-	22255765	22255817
miRNA	hsa-novelmiR-117-3p	chr1	22582258	22582282	-	chr1	-	22255765	22255789
miRNA	hsa-novelmiR-117-5p	chr1	22582284	22582310	-	chr1	-	22255791	22255817
premiRNA	hsa-novelmir-118	chr1	23075332	23075389	+	chr1	+	22748839	22748896
miRNA	hsa-novelmiR-118-3p	chr1	23075368	23075389	+	chr1	+	22748875	22748896
miRNA	hsa-novelmiR-118-5p	chr1	23075332	23075354	+	chr1	+	22748839	22748861
premiRNA	hsa-novelmir-119	chr1	23610896	23610955	-	chr1	-	23284403	23284462
miRNA	hsa-novelmiR-119-5p	chr1	23610932	23610955	-	chr1	-	23284439	23284462
miRNA	hsa-novelmiR-119-3p	chr1	23610896	23610917	-	chr1	-	23284403	23284424
premiRNA	hsa-novelmir-120	chr1	23756053	23756113	-	chr1	-	23429560	23429620
miRNA	hsa-novelmiR-120-3p	chr1	23756053	23756074	-	chr1	-	23429560	23429581
miRNA	hsa-novelmiR-120-5p	chr1	23756092	23756113	-	chr1	-	23429599	23429620
premiRNA	hsa-novelmir-121	chr1	24126960	24127042	+	chr1	+	23800470	23800552
miRNA	hsa-novelmiR-121-3p	chr1	24127022	24127042	+	chr1	+	23800532	23800552
miRNA	hsa-novelmiR-121-5p	chr1	24126960	24126975	+	chr1	+	23800470	23800485
premiRNA	hsa-novelmir-122	chr1	24291584	24291664	-	chr1	-	23965094	23965174
miRNA	hsa-novelmiR-122-5p	chr1	24291645	24291664	-	chr1	-	23965155	23965174
miRNA	hsa-novelmiR-122-3p	chr1	24291584	24291601	-	chr1	-	23965094	23965111
premiRNA	hsa-novelmir-123	chr1	24474601	24474681	-	chr1	-	24148111	24148191
miRNA	hsa-novelmiR-123-5p	chr1	24474662	24474681	-	chr1	-	24148172	24148191
miRNA	hsa-novelmiR-123-3p	chr1	24474601	24474625	-	chr1	-	24148111	24148135
premiRNA	hsa-novelmir-124	chr1	24507416	24507499	-	chr1	-	24180926	24181009
miRNA	hsa-novelmiR-124-5p	chr1	24507477	24507499	-	chr1	-	24180987	24181009
miRNA	hsa-novelmiR-124-3p	chr1	24507416	24507440	-	chr1	-	24180926	24180950
premiRNA	hsa-novelmir-125	chr1	24779936	24779984	+	chr1	+	24453446	24453494
miRNA	hsa-novelmiR-125-5p	chr1	24779936	24779958	+	chr1	+	24453446	24453468
miRNA	hsa-novelmiR-125-3p	chr1	24779965	24779984	+	chr1	+	24453475	24453494
premiRNA	hsa-novelmir-126	chr1	24861586	24861644	+	chr1	+	24535096	24535154
miRNA	hsa-novelmiR-126-5p	chr1	24861586	24861608	+	chr1	+	24535096	24535118
miRNA	hsa-novelmiR-126-3p	chr1	24861622	24861644	+	chr1	+	24535132	24535154
premiRNA	hsa-novelmir-127	chr1	25051660	25051722	+	chr1	+	24725169	24725231
miRNA	hsa-novelmiR-127-5p	chr1	25051660	25051683	+	chr1	+	24725169	24725192
miRNA	hsa-novelmiR-127-3p	chr1	25051702	25051722	+	chr1	+	24725211	24725231
premiRNA	hsa-novelmir-128	chr1	25069216	25069291	-	chr1	-	24742725	24742800
miRNA	hsa-novelmiR-128-5p	chr1	25069271	25069291	-	chr1	-	24742780	24742800
miRNA	hsa-novelmiR-128-3p	chr1	25069216	25069236	-	chr1	-	24742725	24742745
premiRNA	hsa-novelmir-129	chr1	25264865	25264926	-	chr1	-	24938374	24938435
miRNA	hsa-novelmiR-129-3p	chr1	25264865	25264887	-	chr1	-	24938374	24938396
miRNA	hsa-novelmiR-129-5p	chr1	25264907	25264926	-	chr1	-	24938416	24938435
premiRNA	hsa-novelmir-130	chr1	25350000	25350069	-	chr1	-	25023509	25023578
miRNA	hsa-novelmiR-130-5p	chr1	25350049	25350069	-	chr1	-	25023558	25023578
miRNA	hsa-novelmiR-130-3p	chr1	25350000	25350020	-	chr1	-	25023509	25023529
premiRNA	hsa-novelmir-131	chr1	25565578	25565658	-	chr1	-	25239087	25239167
miRNA	hsa-novelmiR-131-5p	chr1	25565634	25565658	-	chr1	-	25239143	25239167
miRNA	hsa-novelmiR-131-3p	chr1	25565578	25565595	-	chr1	-	25239087	25239104
premiRNA	hsa-novelmir-132	chr1	26796327	26796363	+	chr1	+	26469836	26469872
miRNA	hsa-novelmiR-132-3p	chr1	26796346	26796363	+	chr1	+	26469855	26469872
miRNA	hsa-novelmiR-132-5p	chr1	26796327	26796344	+	chr1	+	26469836	26469853
premiRNA	hsa-novelmir-133	chr1	27019819	27019886	+	chr1	+	26693328	26693395
miRNA	hsa-novelmiR-133-5p	chr1	27019819	27019841	+	chr1	+	26693328	26693350
miRNA	hsa-novelmiR-133-3p	chr1	27019865	27019886	+	chr1	+	26693374	26693395
premiRNA	hsa-novelmir-134	chr1	27024444	27024519	+	chr1	+	26697953	26698028
miRNA	hsa-novelmiR-134-3p	chr1	27024496	27024519	+	chr1	+	26698005	26698028
miRNA	hsa-novelmiR-134-5p	chr1	27024444	27024466	+	chr1	+	26697953	26697975
premiRNA	hsa-novelmir-135	chr1	27188794	27188840	-	chr1	-	26862303	26862349
miRNA	hsa-novelmiR-135-3p	chr1	27188794	27188811	-	chr1	-	26862303	26862320
miRNA	hsa-novelmiR-135-5p	chr1	27188821	27188840	-	chr1	-	26862330	26862349
premiRNA	hsa-novelmir-136	chr1	27323994	27324051	+	chr1	+	26997503	26997560
miRNA	hsa-novelmiR-136-3p	chr1	27324030	27324051	+	chr1	+	26997539	26997560
miRNA	hsa-novelmiR-136-5p	chr1	27323994	27324015	+	chr1	+	26997503	26997524
premiRNA	hsa-novelmir-137	chr1	27324415	27324491	+	chr1	+	26997924	26998000
miRNA	hsa-novelmiR-137-3p	chr1	27324471	27324491	+	chr1	+	26997980	26998000
miRNA	hsa-novelmiR-137-5p	chr1	27324415	27324436	+	chr1	+	26997924	26997945
premiRNA	hsa-novelmir-138	chr1	27325120	27325161	+	chr1	+	26998629	26998670
miRNA	hsa-novelmiR-138-5p	chr1	27325120	27325137	+	chr1	+	26998629	26998646
miRNA	hsa-novelmiR-138-3p	chr1	27325145	27325161	+	chr1	+	26998654	26998670
premiRNA	hsa-novelmir-139	chr1	27328001	27328072	+	chr1	+	27001510	27001581
miRNA	hsa-novelmiR-139-3p	chr1	27328055	27328072	+	chr1	+	27001564	27001581
miRNA	hsa-novelmiR-139-5p	chr1	27328001	27328017	+	chr1	+	27001510	27001526
premiRNA	hsa-novelmir-140	chr1	27339013	27339066	-	chr1	-	27012522	27012575
miRNA	hsa-novelmiR-140-3p	chr1	27339013	27339031	-	chr1	-	27012522	27012540
miRNA	hsa-novelmiR-140-5p	chr1	27339044	27339066	-	chr1	-	27012553	27012575
premiRNA	hsa-novelmir-141	chr1	27469135	27469206	-	chr1	-	27142644	27142715
miRNA	hsa-novelmiR-141-3p	chr1	27469135	27469157	-	chr1	-	27142644	27142666
miRNA	hsa-novelmiR-141-5p	chr1	27469185	27469206	-	chr1	-	27142694	27142715
premiRNA	hsa-novelmir-142	chr1	27480983	27481056	-	chr1	-	27154492	27154565
miRNA	hsa-novelmiR-142-5p	chr1	27481032	27481056	-	chr1	-	27154541	27154565
miRNA	hsa-novelmiR-142-3p	chr1	27480983	27481002	-	chr1	-	27154492	27154511
premiRNA	hsa-novelmir-143	chr1	27660893	27660976	-	chr1	-	27334402	27334485
miRNA	hsa-novelmiR-143-3p	chr1	27660893	27660915	-	chr1	-	27334402	27334424
miRNA	hsa-novelmiR-143-5p	chr1	27660954	27660976	-	chr1	-	27334463	27334485
premiRNA	hsa-novelmir-144	chr1	27678454	27678510	+	chr1	+	27351963	27352019
miRNA	hsa-novelmiR-144-3p	chr1	27678488	27678510	+	chr1	+	27351997	27352019
miRNA	hsa-novelmiR-144-5p	chr1	27678454	27678471	+	chr1	+	27351963	27351980
premiRNA	hsa-novelmir-145	chr1	27732311	27732378	-	chr1	-	27405817	27405884
miRNA	hsa-novelmiR-145-5p	chr1	27732357	27732378	-	chr1	-	27405863	27405884
miRNA	hsa-novelmiR-145-3p	chr1	27732311	27732332	-	chr1	-	27405817	27405838
premiRNA	hsa-novelmir-146	chr1	27747491	27747550	-	chr1	-	27420989	27421048
miRNA	hsa-novelmiR-146-5p	chr1	27747528	27747550	-	chr1	-	27421026	27421048
miRNA	hsa-novelmiR-146-3p	chr1	27747491	27747512	-	chr1	-	27420989	27421010
premiRNA	hsa-novelmir-147	chr1	27831754	27831805	-	chr1	-	27505243	27505294
miRNA	hsa-novelmiR-147-3p	chr1	27831754	27831773	-	chr1	-	27505243	27505262
miRNA	hsa-novelmiR-147-5p	chr1	27831785	27831805	-	chr1	-	27505274	27505294
premiRNA	hsa-novelmir-148	chr1	27844519	27844576	-	chr1	-	27518008	27518065
miRNA	hsa-novelmiR-148-3p	chr1	27844519	27844539	-	chr1	-	27518008	27518028
miRNA	hsa-novelmiR-148-5p	chr1	27844554	27844576	-	chr1	-	27518043	27518065
premiRNA	hsa-novelmir-149	chr1	28161090	28161140	+	chr1	+	27834579	27834629
miRNA	hsa-novelmiR-149-3p	chr1	28161116	28161140	+	chr1	+	27834605	27834629
miRNA	hsa-novelmiR-149-5p	chr1	28161090	28161113	+	chr1	+	27834579	27834602
premiRNA	hsa-novelmir-150	chr1	28275027	28275079	+	chr1	+	27948516	27948568
miRNA	hsa-novelmiR-150-3p	chr1	28275055	28275079	+	chr1	+	27948544	27948568
miRNA	hsa-novelmiR-150-5p	chr1	28275027	28275049	+	chr1	+	27948516	27948538
premiRNA	hsa-novelmir-151	chr1	28308692	28308759	-	chr1	-	27982181	27982248
miRNA	hsa-novelmiR-151-3p	chr1	28308692	28308714	-	chr1	-	27982181	27982203
miRNA	hsa-novelmiR-151-5p	chr1	28308738	28308759	-	chr1	-	27982227	27982248
premiRNA	hsa-novelmir-152	chr1	28357757	28357831	-	chr1	-	28031246	28031320
miRNA	hsa-novelmiR-152-5p	chr1	28357809	28357831	-	chr1	-	28031298	28031320
miRNA	hsa-novelmiR-152-3p	chr1	28357757	28357775	-	chr1	-	28031246	28031264
premiRNA	hsa-novelmir-153	chr1	28395118	28395173	-	chr1	-	28068607	28068662
miRNA	hsa-novelmiR-153-3p	chr1	28395118	28395136	-	chr1	-	28068607	28068625
miRNA	hsa-novelmiR-153-5p	chr1	28395155	28395173	-	chr1	-	28068644	28068662
premiRNA	hsa-novelmir-154	chr1	28414595	28414650	-	chr1	-	28088084	28088139
miRNA	hsa-novelmiR-154-3p	chr1	28414595	28414616	-	chr1	-	28088084	28088105
miRNA	hsa-novelmiR-154-5p	chr1	28414630	28414650	-	chr1	-	28088119	28088139
premiRNA	hsa-novelmir-155	chr1	28569617	28569699	-	chr1	-	28243106	28243188
miRNA	hsa-novelmiR-155-5p	chr1	28569675	28569699	-	chr1	-	28243164	28243188
miRNA	hsa-novelmiR-155-3p	chr1	28569617	28569641	-	chr1	-	28243106	28243130
premiRNA	hsa-novelmir-156	chr1	28588147	28588201	+	chr1	+	28261636	28261690
miRNA	hsa-novelmiR-156-5p	chr1	28588147	28588170	+	chr1	+	28261636	28261659
miRNA	hsa-novelmiR-156-3p	chr1	28588181	28588201	+	chr1	+	28261670	28261690
premiRNA	hsa-novelmir-157	chr1	28755949	28756012	+	chr1	+	28429438	28429501
miRNA	hsa-novelmiR-157-5p	chr1	28755949	28755970	+	chr1	+	28429438	28429459
miRNA	hsa-novelmiR-157-3p	chr1	28755991	28756012	+	chr1	+	28429480	28429501
premiRNA	hsa-novelmir-158	chr1	28845090	28845147	+	chr1	+	28518578	28518635
miRNA	hsa-novelmiR-158-5p	chr1	28845090	28845111	+	chr1	+	28518578	28518599
miRNA	hsa-novelmiR-158-3p	chr1	28845127	28845147	+	chr1	+	28518615	28518635
premiRNA	hsa-novelmir-159	chr1	28904130	28904190	+	chr1	+	28577618	28577678
miRNA	hsa-novelmiR-159-3p	chr1	28904168	28904190	+	chr1	+	28577656	28577678
miRNA	hsa-novelmiR-159-5p	chr1	28904130	28904152	+	chr1	+	28577618	28577640
premiRNA	hsa-novelmir-160	chr1	28928402	28928455	-	chr1	-	28601890	28601943
miRNA	hsa-novelmiR-160-3p	chr1	28928402	28928426	-	chr1	-	28601890	28601914
miRNA	hsa-novelmiR-160-5p	chr1	28928432	28928455	-	chr1	-	28601920	28601943
premiRNA	hsa-novelmir-161	chr1	29214888	29214944	+	chr1	+	28888376	28888432
miRNA	hsa-novelmiR-161-5p	chr1	29214888	29214910	+	chr1	+	28888376	28888398
miRNA	hsa-novelmiR-161-3p	chr1	29214923	29214944	+	chr1	+	28888411	28888432
premiRNA	hsa-novelmir-162	chr1	29507678	29507734	-	chr1	-	29181166	29181222
miRNA	hsa-novelmiR-162-3p	chr1	29507678	29507695	-	chr1	-	29181166	29181183
miRNA	hsa-novelmiR-162-5p	chr1	29507717	29507734	-	chr1	-	29181205	29181222
premiRNA	hsa-novelmir-163	chr1	29644049	29644114	+	chr1	+	29317537	29317602
miRNA	hsa-novelmiR-163-5p	chr1	29644049	29644071	+	chr1	+	29317537	29317559
miRNA	hsa-novelmiR-163-3p	chr1	29644092	29644114	+	chr1	+	29317580	29317602
premiRNA	hsa-novelmir-164	chr1	31846069	31846130	-	chr1	-	31373222	31373283
miRNA	hsa-novelmiR-164-5p	chr1	31846108	31846130	-	chr1	-	31373261	31373283
miRNA	hsa-novelmiR-164-3p	chr1	31846069	31846090	-	chr1	-	31373222	31373243
premiRNA	hsa-novelmir-165	chr1	32193490	32193546	-	chr1	-	31727889	31727945
miRNA	hsa-novelmiR-165-3p	chr1	32193490	32193511	-	chr1	-	31727889	31727910
miRNA	hsa-novelmiR-165-5p	chr1	32193522	32193546	-	chr1	-	31727921	31727945
premiRNA	hsa-novelmir-166	chr1	32253733	32253802	-	chr1	-	31788132	31788201
miRNA	hsa-novelmiR-166-5p	chr1	32253783	32253802	-	chr1	-	31788182	31788201
miRNA	hsa-novelmiR-166-3p	chr1	32253733	32253748	-	chr1	-	31788132	31788147
premiRNA	hsa-novelmir-167	chr1	32403528	32403581	+	chr1	+	31937927	31937980
miRNA	hsa-novelmiR-167-3p	chr1	32403558	32403581	+	chr1	+	31937957	31937980
miRNA	hsa-novelmiR-167-5p	chr1	32403528	32403552	+	chr1	+	31937927	31937951
premiRNA	hsa-novelmir-168	chr1	32514570	32514625	+	chr1	+	32048969	32049024
miRNA	hsa-novelmiR-168-5p	chr1	32514570	32514591	+	chr1	+	32048969	32048990
miRNA	hsa-novelmiR-168-3p	chr1	32514604	32514625	+	chr1	+	32049003	32049024
premiRNA	hsa-novelmir-169	chr1	32637885	32637943	+	chr1	+	32172284	32172342
miRNA	hsa-novelmiR-169-3p	chr1	32637922	32637943	+	chr1	+	32172321	32172342
miRNA	hsa-novelmiR-169-5p	chr1	32637885	32637906	+	chr1	+	32172284	32172305
premiRNA	hsa-novelmir-170	chr1	32646022	32646107	-	chr1	-	32180421	32180506
miRNA	hsa-novelmiR-170-5p	chr1	32646090	32646107	-	chr1	-	32180489	32180506
miRNA	hsa-novelmiR-170-3p	chr1	32646022	32646043	-	chr1	-	32180421	32180442
premiRNA	hsa-novelmir-171	chr1	32706715	32706774	-	chr1	-	32241114	32241173
miRNA	hsa-novelmiR-171-3p	chr1	32706715	32706736	-	chr1	-	32241114	32241135
miRNA	hsa-novelmiR-171-5p	chr1	32706752	32706774	-	chr1	-	32241151	32241173
premiRNA	hsa-novelmir-172	chr1	33160677	33160747	-	chr1	-	32695076	32695146
miRNA	hsa-novelmiR-172-5p	chr1	33160724	33160747	-	chr1	-	32695123	32695146
miRNA	hsa-novelmiR-172-3p	chr1	33160677	33160698	-	chr1	-	32695076	32695097
premiRNA	hsa-novelmir-173	chr1	33239211	33239292	+	chr1	+	32773610	32773691
miRNA	hsa-novelmiR-173-5p	chr1	33239211	33239233	+	chr1	+	32773610	32773632
miRNA	hsa-novelmiR-173-3p	chr1	33239267	33239292	+	chr1	+	32773666	32773691
premiRNA	hsa-novelmir-174	chr1	33336155	33336192	+	chr1	+	32870554	32870591
miRNA	hsa-novelmiR-174-3p	chr1	33336175	33336192	+	chr1	+	32870574	32870591
miRNA	hsa-novelmiR-174-5p	chr1	33336155	33336173	+	chr1	+	32870554	32870572
premiRNA	hsa-novelmir-175	chr1	33475089	33475142	-	chr1	-	33009488	33009541
miRNA	hsa-novelmiR-175-3p	chr1	33475089	33475110	-	chr1	-	33009488	33009509
miRNA	hsa-novelmiR-175-5p	chr1	33475122	33475142	-	chr1	-	33009521	33009541
premiRNA	hsa-novelmir-176	chr1	33731242	33731304	+	chr1	+	33265641	33265703
miRNA	hsa-novelmiR-176-5p	chr1	33731242	33731264	+	chr1	+	33265641	33265663
miRNA	hsa-novelmiR-176-3p	chr1	33731283	33731304	+	chr1	+	33265682	33265703
premiRNA	hsa-novelmir-177	chr1	33808343	33808395	-	chr1	-	33342742	33342794
miRNA	hsa-novelmiR-177-5p	chr1	33808374	33808395	-	chr1	-	33342773	33342794
miRNA	hsa-novelmiR-177-3p	chr1	33808343	33808363	-	chr1	-	33342742	33342762
premiRNA	hsa-novelmir-178	chr1	33947669	33947720	+	chr1	+	33482069	33482120
miRNA	hsa-novelmiR-178-3p	chr1	33947699	33947720	+	chr1	+	33482099	33482120
miRNA	hsa-novelmiR-178-5p	chr1	33947669	33947690	+	chr1	+	33482069	33482090
premiRNA	hsa-novelmir-179	chr1	34023666	34023726	-	chr1	-	33558066	33558126
miRNA	hsa-novelmiR-179-3p	chr1	34023666	34023688	-	chr1	-	33558066	33558088
miRNA	hsa-novelmiR-179-5p	chr1	34023699	34023726	-	chr1	-	33558099	33558126
premiRNA	hsa-novelmir-180	chr1	34087874	34087930	-	chr1	-	33622274	33622330
miRNA	hsa-novelmiR-180-3p	chr1	34087874	34087896	-	chr1	-	33622274	33622296
miRNA	hsa-novelmiR-180-5p	chr1	34087907	34087930	-	chr1	-	33622307	33622330
premiRNA	hsa-novelmir-181	chr1	34406050	34406110	-	chr1	-	33940449	33940509
miRNA	hsa-novelmiR-181-3p	chr1	34406050	34406072	-	chr1	-	33940449	33940471
miRNA	hsa-novelmiR-181-5p	chr1	34406088	34406110	-	chr1	-	33940487	33940509
premiRNA	hsa-novelmir-182	chr1	34435867	34435927	-	chr1	-	33970266	33970326
miRNA	hsa-novelmiR-182-3p	chr1	34435867	34435890	-	chr1	-	33970266	33970289
miRNA	hsa-novelmiR-182-5p	chr1	34435901	34435927	-	chr1	-	33970300	33970326
premiRNA	hsa-novelmir-183	chr1	34632906	34632951	+	chr1	+	34167305	34167350
miRNA	hsa-novelmiR-183-3p	chr1	34632934	34632951	+	chr1	+	34167333	34167350
miRNA	hsa-novelmiR-183-5p	chr1	34632906	34632920	+	chr1	+	34167305	34167319
premiRNA	hsa-novelmir-184	chr1	35331640	35331719	+	chr1	+	34866039	34866118
miRNA	hsa-novelmiR-184-3p	chr1	35331700	35331719	+	chr1	+	34866099	34866118
miRNA	hsa-novelmiR-184-5p	chr1	35331640	35331657	+	chr1	+	34866039	34866056
premiRNA	hsa-novelmir-185	chr1	35930325	35930393	-	chr1	-	35464724	35464792
miRNA	hsa-novelmiR-185-5p	chr1	35930374	35930393	-	chr1	-	35464773	35464792
miRNA	hsa-novelmiR-185-3p	chr1	35930325	35930347	-	chr1	-	35464724	35464746
premiRNA	hsa-novelmir-186	chr1	36046800	36046856	+	chr1	+	35581199	35581255
miRNA	hsa-novelmiR-186-3p	chr1	36046835	36046856	+	chr1	+	35581234	35581255
miRNA	hsa-novelmiR-186-5p	chr1	36046800	36046821	+	chr1	+	35581199	35581220
premiRNA	hsa-novelmir-187	chr1	36234089	36234175	-	chr1	-	35768488	35768574
miRNA	hsa-novelmiR-187-5p	chr1	36234156	36234175	-	chr1	-	35768555	35768574
miRNA	hsa-novelmiR-187-3p	chr1	36234089	36234105	-	chr1	-	35768488	35768504
premiRNA	hsa-novelmir-188	chr1	36437596	36437679	+	chr1	+	35971995	35972078
miRNA	hsa-novelmiR-188-3p	chr1	36437660	36437679	+	chr1	+	35972059	35972078
miRNA	hsa-novelmiR-188-5p	chr1	36437596	36437618	+	chr1	+	35971995	35972017
premiRNA	hsa-novelmir-189	chr1	36645508	36645594	+	chr1	+	36179907	36179993
miRNA	hsa-novelmiR-189-3p	chr1	36645575	36645594	+	chr1	+	36179974	36179993
miRNA	hsa-novelmiR-189-5p	chr1	36645508	36645531	+	chr1	+	36179907	36179930
premiRNA	hsa-novelmir-190	chr1	36773032	36773095	+	chr1	+	36307431	36307494
miRNA	hsa-novelmiR-190-3p	chr1	36773075	36773095	+	chr1	+	36307474	36307494
miRNA	hsa-novelmiR-190-5p	chr1	36773032	36773051	+	chr1	+	36307431	36307450
premiRNA	hsa-novelmir-191	chr1	36782224	36782312	-	chr1	-	36316623	36316711
miRNA	hsa-novelmiR-191-5p	chr1	36782290	36782312	-	chr1	-	36316689	36316711
miRNA	hsa-novelmiR-191-3p	chr1	36782224	36782245	-	chr1	-	36316623	36316644
premiRNA	hsa-novelmir-192	chr1	36785561	36785631	+	chr1	+	36319960	36320030
miRNA	hsa-novelmiR-192-5p	chr1	36785561	36785585	+	chr1	+	36319960	36319984
miRNA	hsa-novelmiR-192-3p	chr1	36785606	36785631	+	chr1	+	36320005	36320030
premiRNA	hsa-novelmir-193	chr1	36785723	36785802	-	chr1	-	36320122	36320201
miRNA	hsa-novelmiR-193-5p	chr1	36785780	36785802	-	chr1	-	36320179	36320201
miRNA	hsa-novelmiR-193-3p	chr1	36785723	36785746	-	chr1	-	36320122	36320145
premiRNA	hsa-novelmir-194	chr1	36825031	36825073	-	chr1	-	36359430	36359472
miRNA	hsa-novelmiR-194-5p	chr1	36825051	36825073	-	chr1	-	36359450	36359472
miRNA	hsa-novelmiR-194-3p	chr1	36825031	36825048	-	chr1	-	36359430	36359447
premiRNA	hsa-novelmir-195	chr1	36852802	36852865	+	chr1	+	36387201	36387264
miRNA	hsa-novelmiR-195-3p	chr1	36852842	36852865	+	chr1	+	36387241	36387264
miRNA	hsa-novelmiR-195-5p	chr1	36852802	36852824	+	chr1	+	36387201	36387223
premiRNA	hsa-novelmir-196	chr1	37523042	37523113	+	chr1	+	37057441	37057512
miRNA	hsa-novelmiR-196-5p	chr1	37523042	37523062	+	chr1	+	37057441	37057461
miRNA	hsa-novelmiR-196-3p	chr1	37523093	37523113	+	chr1	+	37057492	37057512
premiRNA	hsa-novelmir-197	chr1	37913755	37913819	-	chr1	-	37448154	37448218
miRNA	hsa-novelmiR-197-5p	chr1	37913801	37913819	-	chr1	-	37448200	37448218
miRNA	hsa-novelmiR-197-3p	chr1	37913755	37913775	-	chr1	-	37448154	37448174
premiRNA	hsa-novelmir-198	chr1	37919578	37919639	-	chr1	-	37453977	37454038
miRNA	hsa-novelmiR-198-3p	chr1	37919578	37919599	-	chr1	-	37453977	37453998
miRNA	hsa-novelmiR-198-5p	chr1	37919618	37919639	-	chr1	-	37454017	37454038
premiRNA	hsa-novelmir-199	chr1	37948493	37948552	+	chr1	+	37482892	37482951
miRNA	hsa-novelmiR-199-5p	chr1	37948493	37948514	+	chr1	+	37482892	37482913
miRNA	hsa-novelmiR-199-3p	chr1	37948530	37948552	+	chr1	+	37482929	37482951
premiRNA	hsa-novelmir-200	chr1	37980130	37980200	+	chr1	+	37514529	37514599
miRNA	hsa-novelmiR-200-3p	chr1	37980177	37980200	+	chr1	+	37514576	37514599
miRNA	hsa-novelmiR-200-5p	chr1	37980130	37980152	+	chr1	+	37514529	37514551
premiRNA	hsa-novelmir-201	chr1	38129818	38129853	+	chr1	+	37664146	37664181
miRNA	hsa-novelmiR-201-5p	chr1	38129818	38129835	+	chr1	+	37664146	37664163
miRNA	hsa-novelmiR-201-3p	chr1	38129839	38129853	+	chr1	+	37664167	37664181
premiRNA	hsa-novelmir-202	chr1	38491907	38491949	+	chr1	+	38026235	38026277
miRNA	hsa-novelmiR-202-5p	chr1	38491907	38491924	+	chr1	+	38026235	38026252
miRNA	hsa-novelmiR-202-3p	chr1	38491937	38491949	+	chr1	+	38026265	38026277
premiRNA	hsa-novelmir-203	chr1	39313492	39313538	+	chr1	+	38847820	38847866
miRNA	hsa-novelmiR-203-3p	chr1	39313520	39313538	+	chr1	+	38847848	38847866
miRNA	hsa-novelmiR-203-5p	chr1	39313492	39313509	+	chr1	+	38847820	38847837
premiRNA	hsa-novelmir-204	chr1	39499191	39499247	+	chr1	+	39033519	39033575
miRNA	hsa-novelmiR-204-3p	chr1	39499227	39499247	+	chr1	+	39033555	39033575
miRNA	hsa-novelmiR-204-5p	chr1	39499191	39499213	+	chr1	+	39033519	39033541
premiRNA	hsa-novelmir-205	chr1	39758442	39758501	+	chr1	+	39292770	39292829
miRNA	hsa-novelmiR-205-3p	chr1	39758480	39758501	+	chr1	+	39292808	39292829
miRNA	hsa-novelmiR-205-5p	chr1	39758442	39758466	+	chr1	+	39292770	39292794
premiRNA	hsa-novelmir-206	chr1	40031809	40031868	-	chr1	-	39566137	39566196
miRNA	hsa-novelmiR-206-5p	chr1	40031846	40031868	-	chr1	-	39566174	39566196
miRNA	hsa-novelmiR-206-3p	chr1	40031809	40031830	-	chr1	-	39566137	39566158
premiRNA	hsa-novelmir-207	chr1	41367018	41367076	-	chr1	-	40901346	40901404
miRNA	hsa-novelmiR-207-3p	chr1	41367018	41367040	-	chr1	-	40901346	40901368
miRNA	hsa-novelmiR-207-5p	chr1	41367056	41367076	-	chr1	-	40901384	40901404
premiRNA	hsa-novelmir-208	chr1	41486343	41486396	+	chr1	+	41020671	41020724
miRNA	hsa-novelmiR-208-3p	chr1	41486379	41486396	+	chr1	+	41020707	41020724
miRNA	hsa-novelmiR-208-5p	chr1	41486343	41486361	+	chr1	+	41020671	41020689
premiRNA	hsa-novelmir-209	chr1	41671429	41671488	-	chr1	-	41205757	41205816
miRNA	hsa-novelmiR-209-3p	chr1	41671429	41671452	-	chr1	-	41205757	41205780
miRNA	hsa-novelmiR-209-5p	chr1	41671467	41671488	-	chr1	-	41205795	41205816
premiRNA	hsa-novelmir-210	chr1	42129423	42129481	+	chr1	+	41663752	41663810
miRNA	hsa-novelmiR-210-3p	chr1	42129461	42129481	+	chr1	+	41663790	41663810
miRNA	hsa-novelmiR-210-5p	chr1	42129423	42129442	+	chr1	+	41663752	41663771
premiRNA	hsa-novelmir-211	chr1	42224824	42224881	-	chr1	-	41759153	41759210
miRNA	hsa-novelmiR-211-5p	chr1	42224859	42224881	-	chr1	-	41759188	41759210
miRNA	hsa-novelmiR-211-3p	chr1	42224824	42224845	-	chr1	-	41759153	41759174
premiRNA	hsa-novelmir-212	chr1	42225341	42225400	+	chr1	+	41759670	41759729
miRNA	hsa-novelmiR-212-3p	chr1	42225379	42225400	+	chr1	+	41759708	41759729
miRNA	hsa-novelmiR-212-5p	chr1	42225341	42225362	+	chr1	+	41759670	41759691
premiRNA	hsa-novelmir-213	chr1	42420247	42420313	+	chr1	+	41954576	41954642
miRNA	hsa-novelmiR-213-3p	chr1	42420294	42420313	+	chr1	+	41954623	41954642
miRNA	hsa-novelmiR-213-5p	chr1	42420247	42420269	+	chr1	+	41954576	41954598
premiRNA	hsa-novelmir-214	chr1	43148275	43148347	+	chr1	+	42682604	42682676
miRNA	hsa-novelmiR-214-3p	chr1	43148324	43148347	+	chr1	+	42682653	42682676
miRNA	hsa-novelmiR-214-5p	chr1	43148275	43148298	+	chr1	+	42682604	42682627
premiRNA	hsa-novelmir-215	chr1	43471800	43471847	-	chr1	-	43006129	43006176
miRNA	hsa-novelmiR-215-5p	chr1	43471830	43471847	-	chr1	-	43006159	43006176
miRNA	hsa-novelmiR-215-3p	chr1	43471800	43471813	-	chr1	-	43006129	43006142
premiRNA	hsa-novelmir-216	chr1	43892660	43892725	+	chr1	+	43426989	43427054
miRNA	hsa-novelmiR-216-3p	chr1	43892704	43892725	+	chr1	+	43427033	43427054
miRNA	hsa-novelmiR-216-5p	chr1	43892660	43892680	+	chr1	+	43426989	43427009
premiRNA	hsa-novelmir-217	chr1	43997268	43997327	+	chr1	+	43531597	43531656
miRNA	hsa-novelmiR-217-3p	chr1	43997305	43997327	+	chr1	+	43531634	43531656
miRNA	hsa-novelmiR-217-5p	chr1	43997268	43997286	+	chr1	+	43531597	43531615
premiRNA	hsa-novelmir-218	chr1	44066139	44066200	+	chr1	+	43600468	43600529
miRNA	hsa-novelmiR-218-5p	chr1	44066139	44066160	+	chr1	+	43600468	43600489
miRNA	hsa-novelmiR-218-3p	chr1	44066179	44066200	+	chr1	+	43600508	43600529
premiRNA	hsa-novelmir-219	chr1	44099101	44099175	+	chr1	+	43633430	43633504
miRNA	hsa-novelmiR-219-3p	chr1	44099158	44099175	+	chr1	+	43633487	43633504
miRNA	hsa-novelmiR-219-5p	chr1	44099101	44099120	+	chr1	+	43633430	43633449
premiRNA	hsa-novelmir-220	chr1	44102621	44102681	+	chr1	+	43636950	43637010
miRNA	hsa-novelmiR-220-5p	chr1	44102621	44102640	+	chr1	+	43636950	43636969
miRNA	hsa-novelmiR-220-3p	chr1	44102662	44102681	+	chr1	+	43636991	43637010
premiRNA	hsa-novelmir-221	chr1	44175260	44175323	+	chr1	+	43709589	43709652
miRNA	hsa-novelmiR-221-3p	chr1	44175302	44175323	+	chr1	+	43709631	43709652
miRNA	hsa-novelmiR-221-5p	chr1	44175260	44175281	+	chr1	+	43709589	43709610
premiRNA	hsa-novelmir-222	chr1	44443658	44443747	+	chr1	+	43977986	43978075
miRNA	hsa-novelmiR-222-5p	chr1	44443658	44443678	+	chr1	+	43977986	43978006
miRNA	hsa-novelmiR-222-3p	chr1	44443728	44443747	+	chr1	+	43978056	43978075
premiRNA	hsa-novelmir-223	chr1	44464938	44464990	-	chr1	-	43999266	43999318
miRNA	hsa-novelmiR-223-3p	chr1	44464938	44464958	-	chr1	-	43999266	43999286
miRNA	hsa-novelmiR-223-5p	chr1	44464970	44464990	-	chr1	-	43999298	43999318
premiRNA	hsa-novelmir-224	chr1	44838008	44838063	-	chr1	-	44372336	44372391
miRNA	hsa-novelmiR-224-5p	chr1	44838042	44838063	-	chr1	-	44372370	44372391
miRNA	hsa-novelmiR-224-3p	chr1	44838008	44838032	-	chr1	-	44372336	44372360
premiRNA	hsa-novelmir-225	chr1	45011163	45011222	-	chr1	-	44545491	44545550
miRNA	hsa-novelmiR-225-5p	chr1	45011201	45011222	-	chr1	-	44545529	44545550
miRNA	hsa-novelmiR-225-3p	chr1	45011163	45011184	-	chr1	-	44545491	44545512
premiRNA	hsa-novelmir-226	chr1	45099405	45099481	+	chr1	+	44633733	44633809
miRNA	hsa-novelmiR-226-3p	chr1	45099459	45099481	+	chr1	+	44633787	44633809
miRNA	hsa-novelmiR-226-5p	chr1	45099405	45099425	+	chr1	+	44633733	44633753
premiRNA	hsa-novelmir-227	chr1	45228125	45228189	+	chr1	+	44762453	44762517
miRNA	hsa-novelmiR-227-5p	chr1	45228125	45228148	+	chr1	+	44762453	44762476
miRNA	hsa-novelmiR-227-3p	chr1	45228167	45228189	+	chr1	+	44762495	44762517
premiRNA	hsa-novelmir-228	chr1	45378759	45378828	-	chr1	-	44913087	44913156
miRNA	hsa-novelmiR-228-5p	chr1	45378807	45378828	-	chr1	-	44913135	44913156
miRNA	hsa-novelmiR-228-3p	chr1	45378759	45378779	-	chr1	-	44913087	44913107
premiRNA	hsa-novelmir-229	chr1	45458882	45458968	-	chr1	-	44993210	44993296
miRNA	hsa-novelmiR-229-3p	chr1	45458882	45458902	-	chr1	-	44993210	44993230
miRNA	hsa-novelmiR-229-5p	chr1	45458947	45458968	-	chr1	-	44993275	44993296
premiRNA	hsa-novelmir-230	chr1	45793544	45793598	-	chr1	-	45327872	45327926
miRNA	hsa-novelmiR-230-5p	chr1	45793577	45793598	-	chr1	-	45327905	45327926
miRNA	hsa-novelmiR-230-3p	chr1	45793544	45793566	-	chr1	-	45327872	45327894
premiRNA	hsa-novelmir-231	chr1	45795197	45795237	+	chr1	+	45329525	45329565
miRNA	hsa-novelmiR-231-3p	chr1	45795219	45795237	+	chr1	+	45329547	45329565
miRNA	hsa-novelmiR-231-5p	chr1	45795197	45795217	+	chr1	+	45329525	45329545
premiRNA	hsa-novelmir-232	chr1	45806113	45806196	+	chr1	+	45340441	45340524
miRNA	hsa-novelmiR-232-5p	chr1	45806113	45806130	+	chr1	+	45340441	45340458
miRNA	hsa-novelmiR-232-3p	chr1	45806178	45806196	+	chr1	+	45340506	45340524
premiRNA	hsa-novelmir-233	chr1	45834237	45834299	+	chr1	+	45368565	45368627
miRNA	hsa-novelmiR-233-5p	chr1	45834237	45834259	+	chr1	+	45368565	45368587
miRNA	hsa-novelmiR-233-3p	chr1	45834273	45834299	+	chr1	+	45368601	45368627
premiRNA	hsa-novelmir-234	chr1	46598160	46598214	+	chr1	+	46132488	46132542
miRNA	hsa-novelmiR-234-5p	chr1	46598160	46598180	+	chr1	+	46132488	46132508
miRNA	hsa-novelmiR-234-3p	chr1	46598195	46598214	+	chr1	+	46132523	46132542
premiRNA	hsa-novelmir-235	chr1	46638086	46638141	-	chr1	-	46172414	46172469
miRNA	hsa-novelmiR-235-3p	chr1	46638086	46638105	-	chr1	-	46172414	46172433
miRNA	hsa-novelmiR-235-5p	chr1	46638120	46638141	-	chr1	-	46172448	46172469
premiRNA	hsa-novelmir-236	chr1	46697743	46697809	-	chr1	-	46232071	46232137
miRNA	hsa-novelmiR-236-3p	chr1	46697743	46697766	-	chr1	-	46232071	46232094
miRNA	hsa-novelmiR-236-5p	chr1	46697784	46697809	-	chr1	-	46232112	46232137
premiRNA	hsa-novelmir-237	chr1	46783176	46783232	+	chr1	+	46317504	46317560
miRNA	hsa-novelmiR-237-5p	chr1	46783176	46783199	+	chr1	+	46317504	46317527
miRNA	hsa-novelmiR-237-3p	chr1	46783210	46783232	+	chr1	+	46317538	46317560
premiRNA	hsa-novelmir-238	chr1	46877207	46877283	+	chr1	+	46411535	46411611
miRNA	hsa-novelmiR-238-5p	chr1	46877207	46877230	+	chr1	+	46411535	46411558
miRNA	hsa-novelmiR-238-3p	chr1	46877262	46877283	+	chr1	+	46411590	46411611
premiRNA	hsa-novelmir-239	chr1	47079955	47080023	-	chr1	-	46614283	46614351
miRNA	hsa-novelmiR-239-3p	chr1	47079955	47079975	-	chr1	-	46614283	46614303
miRNA	hsa-novelmiR-239-5p	chr1	47079998	47080023	-	chr1	-	46614326	46614351
premiRNA	hsa-novelmir-240	chr1	47090597	47090647	+	chr1	+	46624925	46624975
miRNA	hsa-novelmiR-240-3p	chr1	47090626	47090647	+	chr1	+	46624954	46624975
miRNA	hsa-novelmiR-240-5p	chr1	47090597	47090617	+	chr1	+	46624925	46624945
premiRNA	hsa-novelmir-241	chr1	47155689	47155740	+	chr1	+	46690017	46690068
miRNA	hsa-novelmiR-241-5p	chr1	47155689	47155709	+	chr1	+	46690017	46690037
miRNA	hsa-novelmiR-241-3p	chr1	47155725	47155740	+	chr1	+	46690053	46690068
premiRNA	hsa-novelmir-242	chr1	47515367	47515423	-	chr1	-	47049695	47049751
miRNA	hsa-novelmiR-242-5p	chr1	47515402	47515423	-	chr1	-	47049730	47049751
miRNA	hsa-novelmiR-242-3p	chr1	47515367	47515391	-	chr1	-	47049695	47049719
premiRNA	hsa-novelmir-243	chr1	47644985	47645048	+	chr1	+	47179313	47179376
miRNA	hsa-novelmiR-243-3p	chr1	47645031	47645048	+	chr1	+	47179359	47179376
miRNA	hsa-novelmiR-243-5p	chr1	47644985	47645006	+	chr1	+	47179313	47179334
premiRNA	hsa-novelmir-244	chr1	47765736	47765798	-	chr1	-	47300064	47300126
miRNA	hsa-novelmiR-244-5p	chr1	47765780	47765798	-	chr1	-	47300108	47300126
miRNA	hsa-novelmiR-244-3p	chr1	47765736	47765753	-	chr1	-	47300064	47300081
premiRNA	hsa-novelmir-245	chr1	47790429	47790495	-	chr1	-	47324757	47324823
miRNA	hsa-novelmiR-245-5p	chr1	47790476	47790495	-	chr1	-	47324804	47324823
miRNA	hsa-novelmiR-245-3p	chr1	47790429	47790448	-	chr1	-	47324757	47324776
premiRNA	hsa-novelmir-246	chr1	48773096	48773154	-	chr1	-	48307424	48307482
miRNA	hsa-novelmiR-246-5p	chr1	48773133	48773154	-	chr1	-	48307461	48307482
miRNA	hsa-novelmiR-246-3p	chr1	48773096	48773117	-	chr1	-	48307424	48307445
premiRNA	hsa-novelmir-247	chr1	49156297	49156355	+	chr1	+	48690625	48690683
miRNA	hsa-novelmiR-247-3p	chr1	49156334	49156355	+	chr1	+	48690662	48690683
miRNA	hsa-novelmiR-247-5p	chr1	49156297	49156320	+	chr1	+	48690625	48690648
premiRNA	hsa-novelmir-248	chr1	50623913	50623965	-	chr1	-	50158241	50158293
miRNA	hsa-novelmiR-248-3p	chr1	50623913	50623934	-	chr1	-	50158241	50158262
miRNA	hsa-novelmiR-248-5p	chr1	50623944	50623965	-	chr1	-	50158272	50158293
premiRNA	hsa-novelmir-249	chr1	51442757	51442821	-	chr1	-	50977085	50977149
miRNA	hsa-novelmiR-249-3p	chr1	51442757	51442779	-	chr1	-	50977085	50977107
miRNA	hsa-novelmiR-249-5p	chr1	51442795	51442821	-	chr1	-	50977123	50977149
premiRNA	hsa-novelmir-250	chr1	52231253	52231317	+	chr1	+	51765581	51765645
miRNA	hsa-novelmiR-250-5p	chr1	52231253	52231274	+	chr1	+	51765581	51765602
miRNA	hsa-novelmiR-250-3p	chr1	52231296	52231317	+	chr1	+	51765624	51765645
premiRNA	hsa-novelmir-251	chr1	53290500	53290544	+	chr1	+	52824828	52824872
miRNA	hsa-novelmiR-251-3p	chr1	53290524	53290544	+	chr1	+	52824852	52824872
miRNA	hsa-novelmiR-251-5p	chr1	53290500	53290518	+	chr1	+	52824828	52824846
premiRNA	hsa-novelmir-252	chr1	53428509	53428568	+	chr1	+	52962837	52962896
miRNA	hsa-novelmiR-252-3p	chr1	53428546	53428568	+	chr1	+	52962874	52962896
miRNA	hsa-novelmiR-252-5p	chr1	53428509	53428529	+	chr1	+	52962837	52962857
premiRNA	hsa-novelmir-253	chr1	53793332	53793384	-	chr1	-	53327660	53327712
miRNA	hsa-novelmiR-253-3p	chr1	53793332	53793353	-	chr1	-	53327660	53327681
miRNA	hsa-novelmiR-253-5p	chr1	53793362	53793384	-	chr1	-	53327690	53327712
premiRNA	hsa-novelmir-254	chr1	54231634	54231714	-	chr1	-	53765961	53766041
miRNA	hsa-novelmiR-254-5p	chr1	54231692	54231714	-	chr1	-	53766019	53766041
miRNA	hsa-novelmiR-254-3p	chr1	54231634	54231657	-	chr1	-	53765961	53765984
premiRNA	hsa-novelmir-255	chr1	54412814	54412869	+	chr1	+	53947141	53947196
miRNA	hsa-novelmiR-255-3p	chr1	54412851	54412869	+	chr1	+	53947178	53947196
miRNA	hsa-novelmiR-255-5p	chr1	54412814	54412834	+	chr1	+	53947141	53947161
premiRNA	hsa-novelmir-256	chr1	54519760	54519817	-	chr1	-	54054087	54054144
miRNA	hsa-novelmiR-256-3p	chr1	54519760	54519781	-	chr1	-	54054087	54054108
miRNA	hsa-novelmiR-256-5p	chr1	54519797	54519817	-	chr1	-	54054124	54054144
premiRNA	hsa-novelmir-257	chr1	55266927	55266987	-	chr1	-	54801254	54801314
miRNA	hsa-novelmiR-257-3p	chr1	55266927	55266944	-	chr1	-	54801254	54801271
miRNA	hsa-novelmiR-257-5p	chr1	55266970	55266987	-	chr1	-	54801297	54801314
premiRNA	hsa-novelmir-258	chr1	55529292	55529342	+	chr1	+	55063619	55063669
miRNA	hsa-novelmiR-258-3p	chr1	55529320	55529342	+	chr1	+	55063647	55063669
miRNA	hsa-novelmiR-258-5p	chr1	55529292	55529310	+	chr1	+	55063619	55063637
premiRNA	hsa-novelmir-259	chr1	55589300	55589364	-	chr1	-	55123627	55123691
miRNA	hsa-novelmiR-259-5p	chr1	55589340	55589364	-	chr1	-	55123667	55123691
miRNA	hsa-novelmiR-259-3p	chr1	55589300	55589323	-	chr1	-	55123627	55123650
premiRNA	hsa-novelmir-260	chr1	55784363	55784417	+	chr1	+	55318690	55318744
miRNA	hsa-novelmiR-260-3p	chr1	55784396	55784417	+	chr1	+	55318723	55318744
miRNA	hsa-novelmiR-260-5p	chr1	55784363	55784384	+	chr1	+	55318690	55318711
premiRNA	hsa-novelmir-261	chr1	56902182	56902235	-	chr1	-	56436510	56436563
miRNA	hsa-novelmiR-261-3p	chr1	56902182	56902203	-	chr1	-	56436510	56436531
miRNA	hsa-novelmiR-261-5p	chr1	56902214	56902235	-	chr1	-	56436542	56436563
premiRNA	hsa-novelmir-262	chr1	56995678	56995726	-	chr1	-	56530006	56530054
miRNA	hsa-novelmiR-262-3p	chr1	56995678	56995701	-	chr1	-	56530006	56530029
miRNA	hsa-novelmiR-262-5p	chr1	56995703	56995726	-	chr1	-	56530031	56530054
premiRNA	hsa-novelmir-263	chr1	59013325	59013374	-	chr1	-	58547653	58547702
miRNA	hsa-novelmiR-263-5p	chr1	59013356	59013374	-	chr1	-	58547684	58547702
miRNA	hsa-novelmiR-263-3p	chr1	59013325	59013342	-	chr1	-	58547653	58547670
premiRNA	hsa-novelmir-264	chr1	59119422	59119478	-	chr1	-	58653750	58653806
miRNA	hsa-novelmiR-264-5p	chr1	59119460	59119478	-	chr1	-	58653788	58653806
miRNA	hsa-novelmiR-264-3p	chr1	59119422	59119440	-	chr1	-	58653750	58653768
premiRNA	hsa-novelmir-265	chr1	59574575	59574636	+	chr1	+	59108903	59108964
miRNA	hsa-novelmiR-265-3p	chr1	59574615	59574636	+	chr1	+	59108943	59108964
miRNA	hsa-novelmiR-265-5p	chr1	59574575	59574596	+	chr1	+	59108903	59108924
premiRNA	hsa-novelmir-266	chr1	59910138	59910208	-	chr1	-	59444466	59444536
miRNA	hsa-novelmiR-266-3p	chr1	59910138	59910159	-	chr1	-	59444466	59444487
miRNA	hsa-novelmiR-266-5p	chr1	59910187	59910208	-	chr1	-	59444515	59444536
premiRNA	hsa-novelmir-267	chr1	60371451	60371515	+	chr1	+	59905779	59905843
miRNA	hsa-novelmiR-267-3p	chr1	60371494	60371515	+	chr1	+	59905822	59905843
miRNA	hsa-novelmiR-267-5p	chr1	60371451	60371473	+	chr1	+	59905779	59905801
premiRNA	hsa-novelmir-268	chr1	60392332	60392399	-	chr1	-	59926660	59926727
miRNA	hsa-novelmiR-268-5p	chr1	60392378	60392399	-	chr1	-	59926706	59926727
miRNA	hsa-novelmiR-268-3p	chr1	60392332	60392355	-	chr1	-	59926660	59926683
premiRNA	hsa-novelmir-269	chr1	61902622	61902670	+	chr1	+	61436950	61436998
miRNA	hsa-novelmiR-269-3p	chr1	61902649	61902670	+	chr1	+	61436977	61436998
miRNA	hsa-novelmiR-269-5p	chr1	61902622	61902643	+	chr1	+	61436950	61436971
premiRNA	hsa-novelmir-270	chr1	62311763	62311832	+	chr1	+	61846091	61846160
miRNA	hsa-novelmiR-270-3p	chr1	62311811	62311832	+	chr1	+	61846139	61846160
miRNA	hsa-novelmiR-270-5p	chr1	62311763	62311784	+	chr1	+	61846091	61846112
premiRNA	hsa-novelmir-271	chr1	62622508	62622569	+	chr1	+	62156836	62156897
miRNA	hsa-novelmiR-271-5p	chr1	62622508	62622531	+	chr1	+	62156836	62156859
miRNA	hsa-novelmiR-271-3p	chr1	62622550	62622569	+	chr1	+	62156878	62156897
premiRNA	hsa-novelmir-272	chr1	62632747	62632830	-	chr1	-	62167075	62167158
miRNA	hsa-novelmiR-272-3p	chr1	62632747	62632766	-	chr1	-	62167075	62167094
miRNA	hsa-novelmiR-272-5p	chr1	62632810	62632830	-	chr1	-	62167138	62167158
premiRNA	hsa-novelmir-273	chr1	63182053	63182121	+	chr1	+	62716382	62716450
miRNA	hsa-novelmiR-273-5p	chr1	63182053	63182071	+	chr1	+	62716382	62716400
miRNA	hsa-novelmiR-273-3p	chr1	63182105	63182121	+	chr1	+	62716434	62716450
premiRNA	hsa-novelmir-274	chr1	63966764	63966827	-	chr1	-	63501093	63501156
miRNA	hsa-novelmiR-274-3p	chr1	63966764	63966785	-	chr1	-	63501093	63501114
miRNA	hsa-novelmiR-274-5p	chr1	63966806	63966827	-	chr1	-	63501135	63501156
premiRNA	hsa-novelmir-275	chr1	64911086	64911142	-	chr1	-	64445403	64445459
miRNA	hsa-novelmiR-275-5p	chr1	64911123	64911142	-	chr1	-	64445440	64445459
miRNA	hsa-novelmiR-275-3p	chr1	64911086	64911105	-	chr1	-	64445403	64445422
premiRNA	hsa-novelmir-276	chr1	65142512	65142574	+	chr1	+	64676829	64676891
miRNA	hsa-novelmiR-276-5p	chr1	65142512	65142534	+	chr1	+	64676829	64676851
miRNA	hsa-novelmiR-276-3p	chr1	65142555	65142574	+	chr1	+	64676872	64676891
premiRNA	hsa-novelmir-277	chr1	65360385	65360435	-	chr1	-	64894702	64894752
miRNA	hsa-novelmiR-277-3p	chr1	65360385	65360409	-	chr1	-	64894702	64894726
miRNA	hsa-novelmiR-277-5p	chr1	65360413	65360435	-	chr1	-	64894730	64894752
premiRNA	hsa-novelmir-278	chr1	65900404	65900468	+	chr1	+	65434721	65434785
miRNA	hsa-novelmiR-278-3p	chr1	65900445	65900468	+	chr1	+	65434762	65434785
miRNA	hsa-novelmiR-278-5p	chr1	65900404	65900424	+	chr1	+	65434721	65434741
premiRNA	hsa-novelmir-279	chr1	67450797	67450866	+	chr1	+	66985114	66985183
miRNA	hsa-novelmiR-279-5p	chr1	67450797	67450818	+	chr1	+	66985114	66985135
miRNA	hsa-novelmiR-279-3p	chr1	67450845	67450866	+	chr1	+	66985162	66985183
premiRNA	hsa-novelmir-280	chr1	68305299	68305376	+	chr1	+	67839616	67839693
miRNA	hsa-novelmiR-280-5p	chr1	68305299	68305322	+	chr1	+	67839616	67839639
miRNA	hsa-novelmiR-280-3p	chr1	68305349	68305376	+	chr1	+	67839666	67839693
premiRNA	hsa-novelmir-281	chr1	68625206	68625253	-	chr1	-	68159523	68159570
miRNA	hsa-novelmiR-281-3p	chr1	68625206	68625226	-	chr1	-	68159523	68159543
miRNA	hsa-novelmiR-281-5p	chr1	68625235	68625253	-	chr1	-	68159552	68159570
premiRNA	hsa-novelmir-282	chr1	69013179	69013230	-	chr1	-	68547496	68547547
miRNA	hsa-novelmiR-282-5p	chr1	69013213	69013230	-	chr1	-	68547530	68547547
miRNA	hsa-novelmiR-282-3p	chr1	69013179	69013193	-	chr1	-	68547496	68547510
premiRNA	hsa-novelmir-283	chr1	70819766	70819848	-	chr1	-	70354083	70354165
miRNA	hsa-novelmiR-283-5p	chr1	70819824	70819848	-	chr1	-	70354141	70354165
miRNA	hsa-novelmiR-283-3p	chr1	70819766	70819793	-	chr1	-	70354083	70354110
premiRNA	hsa-novelmir-284	chr1	71547546	71547615	+	chr1	+	71081863	71081932
miRNA	hsa-novelmiR-284-3p	chr1	71547594	71547615	+	chr1	+	71081911	71081932
miRNA	hsa-novelmiR-284-5p	chr1	71547546	71547566	+	chr1	+	71081863	71081883
premiRNA	hsa-novelmir-285	chr1	72740291	72740339	+	chr1	+	72274608	72274656
miRNA	hsa-novelmiR-285-5p	chr1	72740291	72740314	+	chr1	+	72274608	72274631
miRNA	hsa-novelmiR-285-3p	chr1	72740317	72740339	+	chr1	+	72274634	72274656
premiRNA	hsa-novelmir-286	chr1	76259271	76259307	+	chr1	+	75793586	75793622
miRNA	hsa-novelmiR-286-3p	chr1	76259289	76259307	+	chr1	+	75793604	75793622
miRNA	hsa-novelmiR-286-5p	chr1	76259271	76259286	+	chr1	+	75793586	75793601
premiRNA	hsa-novelmir-287	chr1	76586255	76586311	+	chr1	+	76120570	76120626
miRNA	hsa-novelmiR-287-3p	chr1	76586290	76586311	+	chr1	+	76120605	76120626
miRNA	hsa-novelmiR-287-5p	chr1	76586255	76586279	+	chr1	+	76120570	76120594
premiRNA	hsa-novelmir-288	chr1	76588667	76588727	+	chr1	+	76122982	76123042
miRNA	hsa-novelmiR-288-5p	chr1	76588667	76588690	+	chr1	+	76122982	76123005
miRNA	hsa-novelmiR-288-3p	chr1	76588707	76588727	+	chr1	+	76123022	76123042
premiRNA	hsa-novelmir-289	chr1	78426079	78426139	-	chr1	-	77960394	77960454
miRNA	hsa-novelmiR-289-3p	chr1	78426079	78426101	-	chr1	-	77960394	77960416
miRNA	hsa-novelmiR-289-5p	chr1	78426118	78426139	-	chr1	-	77960433	77960454
premiRNA	hsa-novelmir-290	chr1	78460005	78460060	+	chr1	+	77994321	77994376
miRNA	hsa-novelmiR-290-5p	chr1	78460005	78460022	+	chr1	+	77994321	77994338
miRNA	hsa-novelmiR-290-3p	chr1	78460047	78460060	+	chr1	+	77994363	77994376
premiRNA	hsa-novelmir-291	chr1	78569994	78570043	-	chr1	-	78104310	78104359
miRNA	hsa-novelmiR-291-3p	chr1	78569994	78570015	-	chr1	-	78104310	78104331
miRNA	hsa-novelmiR-291-5p	chr1	78570020	78570043	-	chr1	-	78104336	78104359
premiRNA	hsa-novelmir-292	chr1	80492181	80492234	+	chr1	+	80026496	80026549
miRNA	hsa-novelmiR-292-5p	chr1	80492181	80492201	+	chr1	+	80026496	80026516
miRNA	hsa-novelmiR-292-3p	chr1	80492218	80492234	+	chr1	+	80026533	80026549
premiRNA	hsa-novelmir-293	chr1	82174875	82174932	+	chr1	+	81709190	81709247
miRNA	hsa-novelmiR-293-5p	chr1	82174875	82174896	+	chr1	+	81709190	81709211
miRNA	hsa-novelmiR-293-3p	chr1	82174911	82174932	+	chr1	+	81709226	81709247
premiRNA	hsa-novelmir-294	chr1	82291016	82291084	+	chr1	+	81825331	81825399
miRNA	hsa-novelmiR-294-5p	chr1	82291016	82291037	+	chr1	+	81825331	81825352
miRNA	hsa-novelmiR-294-3p	chr1	82291064	82291084	+	chr1	+	81825379	81825399
premiRNA	hsa-novelmir-295	chr1	84158725	84158798	+	chr1	+	83693042	83693115
miRNA	hsa-novelmiR-295-5p	chr1	84158725	84158742	+	chr1	+	83693042	83693059
miRNA	hsa-novelmiR-295-3p	chr1	84158780	84158798	+	chr1	+	83693097	83693115
premiRNA	hsa-novelmir-296	chr1	85528010	85528066	+	chr1	+	85062327	85062383
miRNA	hsa-novelmiR-296-5p	chr1	85528010	85528033	+	chr1	+	85062327	85062350
miRNA	hsa-novelmiR-296-3p	chr1	85528046	85528066	+	chr1	+	85062363	85062383
premiRNA	hsa-novelmir-297	chr1	85667135	85667196	+	chr1	+	85201452	85201513
miRNA	hsa-novelmiR-297-5p	chr1	85667135	85667155	+	chr1	+	85201452	85201472
miRNA	hsa-novelmiR-297-3p	chr1	85667175	85667196	+	chr1	+	85201492	85201513
premiRNA	hsa-novelmir-298	chr1	85751275	85751333	-	chr1	-	85285592	85285650
miRNA	hsa-novelmiR-298-5p	chr1	85751313	85751333	-	chr1	-	85285630	85285650
miRNA	hsa-novelmiR-298-3p	chr1	85751275	85751295	-	chr1	-	85285592	85285612
premiRNA	hsa-novelmir-299	chr1	85751277	85751335	+	chr1	+	85285594	85285652
miRNA	hsa-novelmiR-299-5p	chr1	85751277	85751297	+	chr1	+	85285594	85285614
miRNA	hsa-novelmiR-299-3p	chr1	85751315	85751335	+	chr1	+	85285632	85285652
premiRNA	hsa-novelmir-300	chr1	85793277	85793338	-	chr1	-	85327594	85327655
miRNA	hsa-novelmiR-300-3p	chr1	85793277	85793299	-	chr1	-	85327594	85327616
miRNA	hsa-novelmiR-300-5p	chr1	85793318	85793338	-	chr1	-	85327635	85327655
premiRNA	hsa-novelmir-301	chr1	85930898	85930965	+	chr1	+	85465215	85465282
miRNA	hsa-novelmiR-301-5p	chr1	85930898	85930915	+	chr1	+	85465215	85465232
miRNA	hsa-novelmiR-301-3p	chr1	85930946	85930965	+	chr1	+	85465263	85465282
premiRNA	hsa-novelmir-302	chr1	86501861	86501911	-	chr1	-	86036178	86036228
miRNA	hsa-novelmiR-302-3p	chr1	86501861	86501881	-	chr1	-	86036178	86036198
miRNA	hsa-novelmiR-302-5p	chr1	86501892	86501911	-	chr1	-	86036209	86036228
premiRNA	hsa-novelmir-303	chr1	86574606	86574660	+	chr1	+	86108923	86108977
miRNA	hsa-novelmiR-303-5p	chr1	86574606	86574627	+	chr1	+	86108923	86108944
miRNA	hsa-novelmiR-303-3p	chr1	86574639	86574660	+	chr1	+	86108956	86108977
premiRNA	hsa-novelmir-304	chr1	87071967	87072024	+	chr1	+	86606284	86606341
miRNA	hsa-novelmiR-304-5p	chr1	87071967	87071988	+	chr1	+	86606284	86606305
miRNA	hsa-novelmiR-304-3p	chr1	87072003	87072024	+	chr1	+	86606320	86606341
premiRNA	hsa-novelmir-305	chr1	87169016	87169074	-	chr1	-	86703333	86703391
miRNA	hsa-novelmiR-305-5p	chr1	87169053	87169074	-	chr1	-	86703370	86703391
miRNA	hsa-novelmiR-305-3p	chr1	87169016	87169035	-	chr1	-	86703333	86703352
premiRNA	hsa-novelmir-306	chr1	87250977	87251029	+	chr1	+	86785294	86785346
miRNA	hsa-novelmiR-306-3p	chr1	87251008	87251029	+	chr1	+	86785325	86785346
miRNA	hsa-novelmiR-306-5p	chr1	87250977	87250998	+	chr1	+	86785294	86785315
premiRNA	hsa-novelmir-307	chr1	87516997	87517052	+	chr1	+	87051314	87051369
miRNA	hsa-novelmiR-307-3p	chr1	87517031	87517052	+	chr1	+	87051348	87051369
miRNA	hsa-novelmiR-307-5p	chr1	87516997	87517018	+	chr1	+	87051314	87051335
premiRNA	hsa-novelmir-308	chr1	87597779	87597849	+	chr1	+	87132096	87132166
miRNA	hsa-novelmiR-308-5p	chr1	87597779	87597796	+	chr1	+	87132096	87132113
miRNA	hsa-novelmiR-308-3p	chr1	87597831	87597849	+	chr1	+	87132148	87132166
premiRNA	hsa-novelmir-309	chr1	88427820	88427881	-	chr1	-	87962137	87962198
miRNA	hsa-novelmiR-309-3p	chr1	88427820	88427841	-	chr1	-	87962137	87962158
miRNA	hsa-novelmiR-309-5p	chr1	88427860	88427881	-	chr1	-	87962177	87962198
premiRNA	hsa-novelmir-310	chr1	90309381	90309444	+	chr1	+	89843822	89843885
miRNA	hsa-novelmiR-310-5p	chr1	90309381	90309404	+	chr1	+	89843822	89843845
miRNA	hsa-novelmiR-310-3p	chr1	90309418	90309444	+	chr1	+	89843859	89843885
premiRNA	hsa-novelmir-311	chr1	92304569	92304633	-	chr1	-	91839012	91839076
miRNA	hsa-novelmiR-311-5p	chr1	92304614	92304633	-	chr1	-	91839057	91839076
miRNA	hsa-novelmiR-311-3p	chr1	92304569	92304585	-	chr1	-	91839012	91839028
premiRNA	hsa-novelmir-312	chr1	92351344	92351403	-	chr1	-	91885787	91885846
miRNA	hsa-novelmiR-312-3p	chr1	92351344	92351361	-	chr1	-	91885787	91885804
miRNA	hsa-novelmiR-312-5p	chr1	92351387	92351403	-	chr1	-	91885830	91885846
premiRNA	hsa-novelmir-313	chr1	93146663	93146721	-	chr1	-	92681106	92681164
miRNA	hsa-novelmiR-313-3p	chr1	93146663	93146684	-	chr1	-	92681106	92681127
miRNA	hsa-novelmiR-313-5p	chr1	93146698	93146721	-	chr1	-	92681141	92681164
premiRNA	hsa-novelmir-314	chr1	93297903	93297952	+	chr1	+	92832346	92832395
miRNA	hsa-novelmiR-314-3p	chr1	93297934	93297952	+	chr1	+	92832377	92832395
miRNA	hsa-novelmiR-314-5p	chr1	93297903	93297920	+	chr1	+	92832346	92832363
premiRNA	hsa-novelmir-315	chr1	93321140	93321201	+	chr1	+	92855583	92855644
miRNA	hsa-novelmiR-315-3p	chr1	93321180	93321201	+	chr1	+	92855623	92855644
miRNA	hsa-novelmiR-315-5p	chr1	93321140	93321165	+	chr1	+	92855583	92855608
premiRNA	hsa-novelmir-316	chr1	93333690	93333749	-	chr1	-	92868133	92868192
miRNA	hsa-novelmiR-316-5p	chr1	93333727	93333749	-	chr1	-	92868170	92868192
miRNA	hsa-novelmiR-316-3p	chr1	93333690	93333711	-	chr1	-	92868133	92868154
premiRNA	hsa-novelmir-317	chr1	93594035	93594093	+	chr1	+	93128478	93128536
miRNA	hsa-novelmiR-317-5p	chr1	93594035	93594054	+	chr1	+	93128478	93128497
miRNA	hsa-novelmiR-317-3p	chr1	93594077	93594093	+	chr1	+	93128520	93128536
premiRNA	hsa-novelmir-318	chr1	94313331	94313379	+	chr1	+	93847775	93847823
miRNA	hsa-novelmiR-318-5p	chr1	94313331	94313348	+	chr1	+	93847775	93847792
miRNA	hsa-novelmiR-318-3p	chr1	94313360	94313379	+	chr1	+	93847804	93847823
premiRNA	hsa-novelmir-319	chr1	94983134	94983216	+	chr1	+	94517578	94517660
miRNA	hsa-novelmiR-319-3p	chr1	94983194	94983216	+	chr1	+	94517638	94517660
miRNA	hsa-novelmiR-319-5p	chr1	94983134	94983156	+	chr1	+	94517578	94517600
premiRNA	hsa-novelmir-320	chr1	95360865	95360921	-	chr1	-	94895309	94895365
miRNA	hsa-novelmiR-320-3p	chr1	95360865	95360884	-	chr1	-	94895309	94895328
miRNA	hsa-novelmiR-320-5p	chr1	95360899	95360921	-	chr1	-	94895343	94895365
premiRNA	hsa-novelmir-321	chr1	95620394	95620448	-	chr1	-	95154838	95154892
miRNA	hsa-novelmiR-321-3p	chr1	95620394	95620414	-	chr1	-	95154838	95154858
miRNA	hsa-novelmiR-321-5p	chr1	95620428	95620448	-	chr1	-	95154872	95154892
premiRNA	hsa-novelmir-322	chr1	95620396	95620450	+	chr1	+	95154840	95154894
miRNA	hsa-novelmiR-322-3p	chr1	95620430	95620450	+	chr1	+	95154874	95154894
miRNA	hsa-novelmiR-322-5p	chr1	95620396	95620416	+	chr1	+	95154840	95154860
premiRNA	hsa-novelmir-323	chr1	96408162	96408219	-	chr1	-	95942606	95942663
miRNA	hsa-novelmiR-323-5p	chr1	96408198	96408219	-	chr1	-	95942642	95942663
miRNA	hsa-novelmiR-323-3p	chr1	96408162	96408183	-	chr1	-	95942606	95942627
premiRNA	hsa-novelmir-324	chr1	96408165	96408221	+	chr1	+	95942609	95942665
miRNA	hsa-novelmiR-324-5p	chr1	96408165	96408185	+	chr1	+	95942609	95942629
miRNA	hsa-novelmiR-324-3p	chr1	96408200	96408221	+	chr1	+	95942644	95942665
premiRNA	hsa-novelmir-325	chr1	96477379	96477437	-	chr1	-	96011823	96011881
miRNA	hsa-novelmiR-325-5p	chr1	96477417	96477437	-	chr1	-	96011861	96011881
miRNA	hsa-novelmiR-325-3p	chr1	96477379	96477399	-	chr1	-	96011823	96011843
premiRNA	hsa-novelmir-326	chr1	97452123	97452191	+	chr1	+	96986567	96986635
miRNA	hsa-novelmiR-326-3p	chr1	97452174	97452191	+	chr1	+	96986618	96986635
miRNA	hsa-novelmiR-326-5p	chr1	97452123	97452138	+	chr1	+	96986567	96986582
premiRNA	hsa-novelmir-327	chr1	98103621	98103688	+	chr1	+	97638065	97638132
miRNA	hsa-novelmiR-327-3p	chr1	98103668	98103688	+	chr1	+	97638112	97638132
miRNA	hsa-novelmiR-327-5p	chr1	98103621	98103641	+	chr1	+	97638065	97638085
premiRNA	hsa-novelmir-328	chr1	98752408	98752467	+	chr1	+	98286852	98286911
miRNA	hsa-novelmiR-328-3p	chr1	98752446	98752467	+	chr1	+	98286890	98286911
miRNA	hsa-novelmiR-328-5p	chr1	98752408	98752428	+	chr1	+	98286852	98286872
premiRNA	hsa-novelmir-329	chr1	100745043	100745133	+	chr1	+	100279487	100279577
miRNA	hsa-novelmiR-329-5p	chr1	100745043	100745066	+	chr1	+	100279487	100279510
miRNA	hsa-novelmiR-329-3p	chr1	100745110	100745133	+	chr1	+	100279554	100279577
premiRNA	hsa-novelmir-330	chr1	101715313	101715372	+	chr1	+	101249757	101249816
miRNA	hsa-novelmiR-330-5p	chr1	101715313	101715334	+	chr1	+	101249757	101249778
miRNA	hsa-novelmiR-330-3p	chr1	101715351	101715372	+	chr1	+	101249795	101249816
premiRNA	hsa-novelmir-331	chr1	101948174	101948228	-	chr1	-	101482618	101482672
miRNA	hsa-novelmiR-331-3p	chr1	101948174	101948195	-	chr1	-	101482618	101482639
miRNA	hsa-novelmiR-331-5p	chr1	101948207	101948228	-	chr1	-	101482651	101482672
premiRNA	hsa-novelmir-332	chr1	102149320	102149381	-	chr1	-	101683764	101683825
miRNA	hsa-novelmiR-332-3p	chr1	102149320	102149340	-	chr1	-	101683764	101683784
miRNA	hsa-novelmiR-332-5p	chr1	102149360	102149381	-	chr1	-	101683804	101683825
premiRNA	hsa-novelmir-333	chr1	107598240	107598323	-	chr1	-	107055618	107055701
miRNA	hsa-novelmiR-333-3p	chr1	107598240	107598261	-	chr1	-	107055618	107055639
miRNA	hsa-novelmiR-333-5p	chr1	107598302	107598323	-	chr1	-	107055680	107055701
premiRNA	hsa-novelmir-334	chr1	109777986	109778053	+	chr1	+	109235364	109235431
miRNA	hsa-novelmiR-334-5p	chr1	109777986	109778005	+	chr1	+	109235364	109235383
miRNA	hsa-novelmiR-334-3p	chr1	109778033	109778053	+	chr1	+	109235411	109235431
premiRNA	hsa-novelmir-335	chr1	109815217	109815284	-	chr1	-	109272595	109272662
miRNA	hsa-novelmiR-335-5p	chr1	109815262	109815284	-	chr1	-	109272640	109272662
miRNA	hsa-novelmiR-335-3p	chr1	109815217	109815238	-	chr1	-	109272595	109272616
premiRNA	hsa-novelmir-336	chr1	109815221	109815284	+	chr1	+	109272599	109272662
miRNA	hsa-novelmiR-336-3p	chr1	109815264	109815284	+	chr1	+	109272642	109272662
miRNA	hsa-novelmiR-336-5p	chr1	109815221	109815240	+	chr1	+	109272599	109272618
premiRNA	hsa-novelmir-337	chr1	110041455	110041510	+	chr1	+	109498833	109498888
miRNA	hsa-novelmiR-337-5p	chr1	110041455	110041476	+	chr1	+	109498833	109498854
miRNA	hsa-novelmiR-337-3p	chr1	110041489	110041510	+	chr1	+	109498867	109498888
premiRNA	hsa-novelmir-338	chr1	110164251	110164303	+	chr1	+	109621629	109621681
miRNA	hsa-novelmiR-338-5p	chr1	110164251	110164268	+	chr1	+	109621629	109621646
miRNA	hsa-novelmiR-338-3p	chr1	110164284	110164303	+	chr1	+	109621662	109621681
premiRNA	hsa-novelmir-339	chr1	110210487	110210548	-	chr1	-	109667865	109667926
miRNA	hsa-novelmiR-339-3p	chr1	110210487	110210508	-	chr1	-	109667865	109667886
miRNA	hsa-novelmiR-339-5p	chr1	110210526	110210548	-	chr1	-	109667904	109667926
premiRNA	hsa-novelmir-340	chr1	110773324	110773385	+	chr1	+	110230702	110230763
miRNA	hsa-novelmiR-340-3p	chr1	110773364	110773385	+	chr1	+	110230742	110230763
miRNA	hsa-novelmiR-340-5p	chr1	110773324	110773346	+	chr1	+	110230702	110230724
premiRNA	hsa-novelmir-341	chr1	110907945	110907993	+	chr1	+	110365323	110365371
miRNA	hsa-novelmiR-341-3p	chr1	110907972	110907993	+	chr1	+	110365350	110365371
miRNA	hsa-novelmiR-341-5p	chr1	110907945	110907967	+	chr1	+	110365323	110365345
premiRNA	hsa-novelmir-342	chr1	111682283	111682351	+	chr1	+	111139661	111139729
miRNA	hsa-novelmiR-342-3p	chr1	111682334	111682351	+	chr1	+	111139712	111139729
miRNA	hsa-novelmiR-342-5p	chr1	111682283	111682300	+	chr1	+	111139661	111139678
premiRNA	hsa-novelmir-343	chr1	111730057	111730123	-	chr1	-	111187435	111187501
miRNA	hsa-novelmiR-343-5p	chr1	111730101	111730123	-	chr1	-	111187479	111187501
miRNA	hsa-novelmiR-343-3p	chr1	111730057	111730079	-	chr1	-	111187435	111187457
premiRNA	hsa-novelmir-344	chr1	111747017	111747097	-	chr1	-	111204395	111204475
miRNA	hsa-novelmiR-344-5p	chr1	111747076	111747097	-	chr1	-	111204454	111204475
miRNA	hsa-novelmiR-344-3p	chr1	111747017	111747038	-	chr1	-	111204395	111204416
premiRNA	hsa-novelmir-345	chr1	111992377	111992458	+	chr1	+	111449755	111449836
miRNA	hsa-novelmiR-345-5p	chr1	111992377	111992395	+	chr1	+	111449755	111449773
miRNA	hsa-novelmiR-345-3p	chr1	111992441	111992458	+	chr1	+	111449819	111449836
premiRNA	hsa-novelmir-346	chr1	112469723	112469786	-	chr1	-	111927101	111927164
miRNA	hsa-novelmiR-346-5p	chr1	112469765	112469786	-	chr1	-	111927143	111927164
miRNA	hsa-novelmiR-346-3p	chr1	112469723	112469745	-	chr1	-	111927101	111927123
premiRNA	hsa-novelmir-347	chr1	112535035	112535099	-	chr1	-	111992413	111992477
miRNA	hsa-novelmiR-347-5p	chr1	112535076	112535099	-	chr1	-	111992454	111992477
miRNA	hsa-novelmiR-347-3p	chr1	112535035	112535057	-	chr1	-	111992413	111992435
premiRNA	hsa-novelmir-348	chr1	112783907	112783968	-	chr1	-	112241285	112241346
miRNA	hsa-novelmiR-348-3p	chr1	112783907	112783929	-	chr1	-	112241285	112241307
miRNA	hsa-novelmiR-348-5p	chr1	112783943	112783968	-	chr1	-	112241321	112241346
premiRNA	hsa-novelmir-349	chr1	113219028	113219112	+	chr1	+	112676406	112676490
miRNA	hsa-novelmiR-349-3p	chr1	113219091	113219112	+	chr1	+	112676469	112676490
miRNA	hsa-novelmiR-349-5p	chr1	113219028	113219048	+	chr1	+	112676406	112676426
premiRNA	hsa-novelmir-350	chr1	113230669	113230722	+	chr1	+	112688047	112688100
miRNA	hsa-novelmiR-350-3p	chr1	113230702	113230722	+	chr1	+	112688080	112688100
miRNA	hsa-novelmiR-350-5p	chr1	113230669	113230692	+	chr1	+	112688047	112688070
premiRNA	hsa-novelmir-351	chr1	113243956	113244014	+	chr1	+	112701334	112701392
miRNA	hsa-novelmiR-351-5p	chr1	113243956	113243980	+	chr1	+	112701334	112701358
miRNA	hsa-novelmiR-351-3p	chr1	113243991	113244014	+	chr1	+	112701369	112701392
premiRNA	hsa-novelmir-352	chr1	113254302	113254362	-	chr1	-	112711680	112711740
miRNA	hsa-novelmiR-352-5p	chr1	113254345	113254362	-	chr1	-	112711723	112711740
miRNA	hsa-novelmiR-352-3p	chr1	113254302	113254320	-	chr1	-	112711680	112711698
premiRNA	hsa-novelmir-353	chr1	113362117	113362161	-	chr1	-	112819495	112819539
miRNA	hsa-novelmiR-353-5p	chr1	113362144	113362161	-	chr1	-	112819522	112819539
miRNA	hsa-novelmiR-353-3p	chr1	113362117	113362135	-	chr1	-	112819495	112819513
premiRNA	hsa-novelmir-354	chr1	113424674	113424746	-	chr1	-	112882052	112882124
miRNA	hsa-novelmiR-354-5p	chr1	113424726	113424746	-	chr1	-	112882104	112882124
miRNA	hsa-novelmiR-354-3p	chr1	113424674	113424694	-	chr1	-	112882052	112882072
premiRNA	hsa-novelmir-355	chr1	113424682	113424742	+	chr1	+	112882060	112882120
miRNA	hsa-novelmiR-355-5p	chr1	113424682	113424703	+	chr1	+	112882060	112882081
miRNA	hsa-novelmiR-355-3p	chr1	113424724	113424742	+	chr1	+	112882102	112882120
premiRNA	hsa-novelmir-356	chr1	114356146	114356202	+	chr1	+	113813524	113813580
miRNA	hsa-novelmiR-356-3p	chr1	114356180	114356202	+	chr1	+	113813558	113813580
miRNA	hsa-novelmiR-356-5p	chr1	114356146	114356166	+	chr1	+	113813524	113813544
premiRNA	hsa-novelmir-357	chr1	114527861	114527898	+	chr1	+	113985239	113985276
miRNA	hsa-novelmiR-357-3p	chr1	114527881	114527898	+	chr1	+	113985259	113985276
miRNA	hsa-novelmiR-357-5p	chr1	114527861	114527878	+	chr1	+	113985239	113985256
premiRNA	hsa-novelmir-358	chr1	115053479	115053533	-	chr1	-	114510858	114510912
miRNA	hsa-novelmiR-358-3p	chr1	115053479	115053499	-	chr1	-	114510858	114510878
miRNA	hsa-novelmiR-358-5p	chr1	115053515	115053533	-	chr1	-	114510894	114510912
premiRNA	hsa-novelmir-359	chr1	115058072	115058147	+	chr1	+	114515451	114515526
miRNA	hsa-novelmiR-359-5p	chr1	115058072	115058090	+	chr1	+	114515451	114515469
miRNA	hsa-novelmiR-359-3p	chr1	115058125	115058147	+	chr1	+	114515504	114515526
premiRNA	hsa-novelmir-360	chr1	115070206	115070286	+	chr1	+	114527585	114527665
miRNA	hsa-novelmiR-360-3p	chr1	115070263	115070286	+	chr1	+	114527642	114527665
miRNA	hsa-novelmiR-360-5p	chr1	115070206	115070230	+	chr1	+	114527585	114527609
premiRNA	hsa-novelmir-361	chr1	116376501	116376572	-	chr1	-	115833880	115833951
miRNA	hsa-novelmiR-361-3p	chr1	116376501	116376522	-	chr1	-	115833880	115833901
miRNA	hsa-novelmiR-361-5p	chr1	116376548	116376572	-	chr1	-	115833927	115833951
premiRNA	hsa-novelmir-362	chr1	116382099	116382145	+	chr1	+	115839478	115839524
miRNA	hsa-novelmiR-362-3p	chr1	116382128	116382145	+	chr1	+	115839507	115839524
miRNA	hsa-novelmiR-362-5p	chr1	116382099	116382115	+	chr1	+	115839478	115839494
premiRNA	hsa-novelmir-363	chr1	117039107	117039158	-	chr1	-	116496485	116496536
miRNA	hsa-novelmiR-363-3p	chr1	117039107	117039127	-	chr1	-	116496485	116496505
miRNA	hsa-novelmiR-363-5p	chr1	117039140	117039158	-	chr1	-	116496518	116496536
premiRNA	hsa-novelmir-364	chr1	117601857	117601920	-	chr1	-	117059235	117059298
miRNA	hsa-novelmiR-364-5p	chr1	117601899	117601920	-	chr1	-	117059277	117059298
miRNA	hsa-novelmiR-364-3p	chr1	117601857	117601877	-	chr1	-	117059235	117059255
premiRNA	hsa-novelmir-365	chr1	117751877	117751934	-	chr1	-	117209255	117209312
miRNA	hsa-novelmiR-365-3p	chr1	117751877	117751898	-	chr1	-	117209255	117209276
miRNA	hsa-novelmiR-365-5p	chr1	117751912	117751934	-	chr1	-	117209290	117209312
premiRNA	hsa-novelmir-366	chr1	118148035	118148089	-	chr1	-	117605413	117605467
miRNA	hsa-novelmiR-366-3p	chr1	118148035	118148056	-	chr1	-	117605413	117605434
miRNA	hsa-novelmiR-366-5p	chr1	118148068	118148089	-	chr1	-	117605446	117605467
premiRNA	hsa-novelmir-367	chr1	118397433	118397490	-	chr1	-	117854811	117854868
miRNA	hsa-novelmiR-367-3p	chr1	118397433	118397454	-	chr1	-	117854811	117854832
miRNA	hsa-novelmiR-367-5p	chr1	118397470	118397490	-	chr1	-	117854848	117854868
premiRNA	hsa-novelmir-368	chr1	119847440	119847492	+	chr1	+	119304817	119304869
miRNA	hsa-novelmiR-368-5p	chr1	119847440	119847460	+	chr1	+	119304817	119304837
miRNA	hsa-novelmiR-368-3p	chr1	119847471	119847492	+	chr1	+	119304848	119304869
premiRNA	hsa-novelmir-369	chr1	120285298	120285369	+	chr1	+	119742675	119742746
miRNA	hsa-novelmiR-369-5p	chr1	120285298	120285320	+	chr1	+	119742675	119742697
miRNA	hsa-novelmiR-369-3p	chr1	120285349	120285369	+	chr1	+	119742726	119742746
premiRNA	hsa-novelmir-370	chr1	121356532	121356596	-	chr1	-	121614734	121614798
miRNA	hsa-novelmiR-370-5p	chr1	121356577	121356596	-	chr1	-	121614779	121614798
miRNA	hsa-novelmiR-370-3p	chr1	121356532	121356554	-	chr1	-	121614734	121614756
premiRNA	hsa-novelmir-371	chr1	144891215	144891274	-	chr1	+	148993200	148993259
miRNA	hsa-novelmiR-371-3p	chr1	144891215	144891235	-	chr1	+	148993239	148993259
miRNA	hsa-novelmiR-371-5p	chr1	144891251	144891274	-	chr1	+	148993200	148993223
premiRNA	hsa-novelmir-372	chr1	145714418	145714471	+	chr1	-	145720614	145720667
miRNA	hsa-novelmiR-372-5p	chr1	145714418	145714440	+	chr1	-	145720645	145720667
miRNA	hsa-novelmiR-372-3p	chr1	145714453	145714471	+	chr1	-	145720614	145720632
premiRNA	hsa-novelmir-373	chr1	145966425	145966484	-	chr1	-	145462780	145462839
miRNA	hsa-novelmiR-373-5p	chr1	145966463	145966484	-	chr1	-	145462818	145462839
miRNA	hsa-novelmiR-373-3p	chr1	145966425	145966446	-	chr1	-	145462780	145462801
premiRNA	hsa-novelmir-374	chr1	146501325	146501384	-	chr1	-	147029772	147029831
miRNA	hsa-novelmiR-374-3p	chr1	146501325	146501345	-	chr1	-	147029772	147029792
miRNA	hsa-novelmiR-374-5p	chr1	146501361	146501384	-	chr1	-	147029808	147029831
premiRNA	hsa-novelmir-375	chr1	146629731	146629787	-	chr1	-	147158152	147158208
miRNA	hsa-novelmiR-375-5p	chr1	146629766	146629787	-	chr1	-	147158187	147158208
miRNA	hsa-novelmiR-375-3p	chr1	146629731	146629752	-	chr1	-	147158152	147158173
premiRNA	hsa-novelmir-376	chr1	146734711	146734774	+	chr1	+	147263053	147263116
miRNA	hsa-novelmiR-376-3p	chr1	146734754	146734774	+	chr1	+	147263096	147263116
miRNA	hsa-novelmiR-376-5p	chr1	146734711	146734731	+	chr1	+	147263053	147263073
premiRNA	hsa-novelmir-377	chr1	147508159	147508218	-	chr1	-	148035908	148035967
miRNA	hsa-novelmiR-377-5p	chr1	147508197	147508218	-	chr1	-	148035946	148035967
miRNA	hsa-novelmiR-377-3p	chr1	147508159	147508180	-	chr1	-	148035908	148035929
premiRNA	hsa-novelmir-378	chr1	147803764	147803824	-	chr1	-	148331639	148331699
miRNA	hsa-novelmiR-378-5p	chr1	147803802	147803824	-	chr1	-	148331677	148331699
miRNA	hsa-novelmiR-378-3p	chr1	147803764	147803785	-	chr1	-	148331639	148331660
premiRNA	hsa-novelmir-379	chr1	147829303	147829364	+	chr1	+	148357175	148357236
miRNA	hsa-novelmiR-379-5p	chr1	147829303	147829325	+	chr1	+	148357175	148357197
miRNA	hsa-novelmiR-379-3p	chr1	147829342	147829364	+	chr1	+	148357214	148357236
premiRNA	hsa-novelmir-380	chr1	148002442	148002500	+	chr1	-	120842641	120842699
miRNA	hsa-novelmiR-380-3p	chr1	148002480	148002500	+	chr1	-	120842641	120842661
miRNA	hsa-novelmiR-380-5p	chr1	148002442	148002462	+	chr1	-	120842679	120842699
premiRNA	hsa-novelmir-381	chr1	148249761	148249819	+	chr1	+	148530903	148530961
miRNA	hsa-novelmiR-381-3p	chr1	148249799	148249819	+	chr1	+	148530941	148530961
miRNA	hsa-novelmiR-381-5p	chr1	148249761	148249781	+	chr1	+	148530903	148530923
premiRNA	hsa-novelmir-382	chr1	148596693	148596751	-	chr1	+	144420903	144420960
miRNA	hsa-novelmiR-382-3p	chr1	148596693	148596713	-	chr1	+	144420940	144420960
miRNA	hsa-novelmiR-382-5p	chr1	148596731	148596751	-	chr1	+	144420903	144420922
premiRNA	hsa-novelmir-383	chr1	148758737	148758795	-	chr1	-	120842641	120842699
miRNA	hsa-novelmiR-383-3p	chr1	148758737	148758757	-	chr1	-	120842641	120842661
miRNA	hsa-novelmiR-383-5p	chr1	148758775	148758795	-	chr1	-	120842679	120842699
premiRNA	hsa-novelmir-384	chr1	149036319	149036373	-	chr1	-	143541652	143541706
miRNA	hsa-novelmiR-384-5p	chr1	149036353	149036373	-	chr1	-	143541686	143541706
miRNA	hsa-novelmiR-384-3p	chr1	149036319	149036340	-	chr1	-	143541652	143541673
premiRNA	hsa-novelmir-385	chr1	149323352	149323409	+	chr1	+	143828788	143828845
miRNA	hsa-novelmiR-385-3p	chr1	149323389	149323409	+	chr1	+	143828825	143828845
miRNA	hsa-novelmiR-385-5p	chr1	149323352	149323373	+	chr1	+	143828788	143828809
premiRNA	hsa-novelmir-386	chr1	149875554	149875600	-	chr1	-	149904002	149904048
miRNA	hsa-novelmiR-386-5p	chr1	149875580	149875600	-	chr1	-	149904028	149904048
miRNA	hsa-novelmiR-386-3p	chr1	149875554	149875575	-	chr1	-	149904002	149904023
premiRNA	hsa-novelmir-387	chr1	149900284	149900340	-	chr1	-	149928392	149928448
miRNA	hsa-novelmiR-387-3p	chr1	149900284	149900305	-	chr1	-	149928392	149928413
miRNA	hsa-novelmiR-387-5p	chr1	149900317	149900340	-	chr1	-	149928425	149928448
premiRNA	hsa-novelmir-388	chr1	149900286	149900340	+	chr1	+	149928394	149928448
miRNA	hsa-novelmiR-388-3p	chr1	149900319	149900340	+	chr1	+	149928427	149928448
miRNA	hsa-novelmiR-388-5p	chr1	149900286	149900307	+	chr1	+	149928394	149928415
premiRNA	hsa-novelmir-389	chr1	150207087	150207138	+	chr1	+	150234739	150234790
miRNA	hsa-novelmiR-389-3p	chr1	150207116	150207138	+	chr1	+	150234768	150234790
miRNA	hsa-novelmiR-389-5p	chr1	150207087	150207106	+	chr1	+	150234739	150234758
premiRNA	hsa-novelmir-390	chr1	150233969	150234021	-	chr1	-	150261570	150261622
miRNA	hsa-novelmiR-390-5p	chr1	150234000	150234021	-	chr1	-	150261601	150261622
miRNA	hsa-novelmiR-390-3p	chr1	150233969	150233986	-	chr1	-	150261570	150261587
premiRNA	hsa-novelmir-391	chr1	150236792	150236847	-	chr1	-	150264392	150264447
miRNA	hsa-novelmiR-391-3p	chr1	150236792	150236814	-	chr1	-	150264392	150264414
miRNA	hsa-novelmiR-391-5p	chr1	150236824	150236847	-	chr1	-	150264424	150264447
premiRNA	hsa-novelmir-392	chr1	150239631	150239710	-	chr1	-	150267231	150267310
miRNA	hsa-novelmiR-392-3p	chr1	150239631	150239653	-	chr1	-	150267231	150267253
miRNA	hsa-novelmiR-392-5p	chr1	150239687	150239710	-	chr1	-	150267287	150267310
premiRNA	hsa-novelmir-393	chr1	150316585	150316638	+	chr1	+	150344109	150344162
miRNA	hsa-novelmiR-393-5p	chr1	150316585	150316606	+	chr1	+	150344109	150344130
miRNA	hsa-novelmiR-393-3p	chr1	150316618	150316638	+	chr1	+	150344142	150344162
premiRNA	hsa-novelmir-394	chr1	150516451	150516512	+	chr1	+	150543975	150544036
miRNA	hsa-novelmiR-394-3p	chr1	150516492	150516512	+	chr1	+	150544016	150544036
miRNA	hsa-novelmiR-394-5p	chr1	150516451	150516473	+	chr1	+	150543975	150543997
premiRNA	hsa-novelmir-395	chr1	150521721	150521783	-	chr1	-	150549245	150549307
miRNA	hsa-novelmiR-395-5p	chr1	150521762	150521783	-	chr1	-	150549286	150549307
miRNA	hsa-novelmiR-395-3p	chr1	150521721	150521738	-	chr1	-	150549245	150549262
premiRNA	hsa-novelmir-396	chr1	150524939	150524991	+	chr1	+	150552463	150552515
miRNA	hsa-novelmiR-396-3p	chr1	150524970	150524991	+	chr1	+	150552494	150552515
miRNA	hsa-novelmiR-396-5p	chr1	150524939	150524961	+	chr1	+	150552463	150552485
premiRNA	hsa-novelmir-397	chr1	150543602	150543654	-	chr1	-	150571126	150571178
miRNA	hsa-novelmiR-397-5p	chr1	150543632	150543654	-	chr1	-	150571156	150571178
miRNA	hsa-novelmiR-397-3p	chr1	150543602	150543620	-	chr1	-	150571126	150571144
premiRNA	hsa-novelmir-398	chr1	150620503	150620584	-	chr1	-	150648027	150648108
miRNA	hsa-novelmiR-398-5p	chr1	150620567	150620584	-	chr1	-	150648091	150648108
miRNA	hsa-novelmiR-398-3p	chr1	150620503	150620524	-	chr1	-	150648027	150648048
premiRNA	hsa-novelmir-399	chr1	150921904	150921960	+	chr1	+	150949428	150949484
miRNA	hsa-novelmiR-399-3p	chr1	150921938	150921960	+	chr1	+	150949462	150949484
miRNA	hsa-novelmiR-399-5p	chr1	150921904	150921926	+	chr1	+	150949428	150949450
premiRNA	hsa-novelmir-400	chr1	150947564	150947624	+	chr1	+	150975088	150975148
miRNA	hsa-novelmiR-400-5p	chr1	150947564	150947586	+	chr1	+	150975088	150975110
miRNA	hsa-novelmiR-400-3p	chr1	150947601	150947624	+	chr1	+	150975125	150975148
premiRNA	hsa-novelmir-401	chr1	150977301	150977374	+	chr1	+	151004825	151004898
miRNA	hsa-novelmiR-401-5p	chr1	150977301	150977319	+	chr1	+	151004825	151004843
miRNA	hsa-novelmiR-401-3p	chr1	150977355	150977374	+	chr1	+	151004879	151004898
premiRNA	hsa-novelmir-402	chr1	150980944	150981005	+	chr1	+	151008468	151008529
miRNA	hsa-novelmiR-402-3p	chr1	150980982	150981005	+	chr1	+	151008506	151008529
miRNA	hsa-novelmiR-402-5p	chr1	150980944	150980965	+	chr1	+	151008468	151008489
premiRNA	hsa-novelmir-403	chr1	151043054	151043113	-	chr1	-	151070578	151070637
miRNA	hsa-novelmiR-403-3p	chr1	151043054	151043076	-	chr1	-	151070578	151070600
miRNA	hsa-novelmiR-403-5p	chr1	151043092	151043113	-	chr1	-	151070616	151070637
premiRNA	hsa-novelmir-404	chr1	151043105	151043151	+	chr1	+	151070629	151070675
miRNA	hsa-novelmiR-404-5p	chr1	151043105	151043124	+	chr1	+	151070629	151070648
miRNA	hsa-novelmiR-404-3p	chr1	151043131	151043151	+	chr1	+	151070655	151070675
premiRNA	hsa-novelmir-405	chr1	151259040	151259104	+	chr1	+	151286564	151286628
miRNA	hsa-novelmiR-405-5p	chr1	151259040	151259061	+	chr1	+	151286564	151286585
miRNA	hsa-novelmiR-405-3p	chr1	151259084	151259104	+	chr1	+	151286608	151286628
premiRNA	hsa-novelmir-406	chr1	151320414	151320487	+	chr1	+	151347938	151348011
miRNA	hsa-novelmiR-406-3p	chr1	151320469	151320487	+	chr1	+	151347993	151348011
miRNA	hsa-novelmiR-406-5p	chr1	151320414	151320431	+	chr1	+	151347938	151347955
premiRNA	hsa-novelmir-407	chr1	151512292	151512340	+	chr1	+	151539816	151539864
miRNA	hsa-novelmiR-407-3p	chr1	151512323	151512340	+	chr1	+	151539847	151539864
miRNA	hsa-novelmiR-407-5p	chr1	151512292	151512310	+	chr1	+	151539816	151539834
premiRNA	hsa-novelmir-408	chr1	151529147	151529205	+	chr1	+	151556671	151556729
miRNA	hsa-novelmiR-408-5p	chr1	151529147	151529168	+	chr1	+	151556671	151556692
miRNA	hsa-novelmiR-408-3p	chr1	151529184	151529205	+	chr1	+	151556708	151556729
premiRNA	hsa-novelmir-409	chr1	151965654	151965710	-	chr1	-	151993178	151993234
miRNA	hsa-novelmiR-409-5p	chr1	151965693	151965710	-	chr1	-	151993217	151993234
miRNA	hsa-novelmiR-409-3p	chr1	151965654	151965674	-	chr1	-	151993178	151993198
premiRNA	hsa-novelmir-410	chr1	153508755	153508809	+	chr1	+	153536279	153536333
miRNA	hsa-novelmiR-410-3p	chr1	153508787	153508809	+	chr1	+	153536311	153536333
miRNA	hsa-novelmiR-410-5p	chr1	153508755	153508778	+	chr1	+	153536279	153536302
premiRNA	hsa-novelmir-411	chr1	153587887	153587973	-	chr1	-	153615411	153615497
miRNA	hsa-novelmiR-411-3p	chr1	153587887	153587907	-	chr1	-	153615411	153615431
miRNA	hsa-novelmiR-411-5p	chr1	153587952	153587973	-	chr1	-	153615476	153615497
premiRNA	hsa-novelmir-412	chr1	153719726	153719786	+	chr1	+	153747250	153747310
miRNA	hsa-novelmiR-412-3p	chr1	153719762	153719786	+	chr1	+	153747286	153747310
miRNA	hsa-novelmiR-412-5p	chr1	153719726	153719751	+	chr1	+	153747250	153747275
premiRNA	hsa-novelmir-413	chr1	153750881	153750937	+	chr1	+	153778405	153778461
miRNA	hsa-novelmiR-413-3p	chr1	153750916	153750937	+	chr1	+	153778440	153778461
miRNA	hsa-novelmiR-413-5p	chr1	153750881	153750903	+	chr1	+	153778405	153778427
premiRNA	hsa-novelmir-414	chr1	153913488	153913536	-	chr1	-	153941012	153941060
miRNA	hsa-novelmiR-414-3p	chr1	153913488	153913509	-	chr1	-	153941012	153941033
miRNA	hsa-novelmiR-414-5p	chr1	153913516	153913536	-	chr1	-	153941040	153941060
premiRNA	hsa-novelmir-415	chr1	153916589	153916654	-	chr1	-	153944113	153944178
miRNA	hsa-novelmiR-415-3p	chr1	153916589	153916606	-	chr1	-	153944113	153944130
miRNA	hsa-novelmiR-415-5p	chr1	153916633	153916654	-	chr1	-	153944157	153944178
premiRNA	hsa-novelmir-416	chr1	153941531	153941596	+	chr1	+	153969055	153969120
miRNA	hsa-novelmiR-416-5p	chr1	153941531	153941552	+	chr1	+	153969055	153969076
miRNA	hsa-novelmiR-416-3p	chr1	153941575	153941596	+	chr1	+	153969099	153969120
premiRNA	hsa-novelmir-417	chr1	153949556	153949604	-	chr1	-	153977080	153977128
miRNA	hsa-novelmiR-417-5p	chr1	153949585	153949604	-	chr1	-	153977109	153977128
miRNA	hsa-novelmiR-417-3p	chr1	153949556	153949573	-	chr1	-	153977080	153977097
premiRNA	hsa-novelmir-418	chr1	154223242	154223307	+	chr1	+	154250766	154250831
miRNA	hsa-novelmiR-418-5p	chr1	154223242	154223263	+	chr1	+	154250766	154250787
miRNA	hsa-novelmiR-418-3p	chr1	154223285	154223307	+	chr1	+	154250809	154250831
premiRNA	hsa-novelmir-419	chr1	154232272	154232338	+	chr1	+	154259796	154259862
miRNA	hsa-novelmiR-419-3p	chr1	154232315	154232338	+	chr1	+	154259839	154259862
miRNA	hsa-novelmiR-419-5p	chr1	154232272	154232296	+	chr1	+	154259796	154259820
premiRNA	hsa-novelmir-420	chr1	154519093	154519155	-	chr1	-	154546617	154546679
miRNA	hsa-novelmiR-420-5p	chr1	154519135	154519155	-	chr1	-	154546659	154546679
miRNA	hsa-novelmiR-420-3p	chr1	154519093	154519115	-	chr1	-	154546617	154546639
premiRNA	hsa-novelmir-421	chr1	154781495	154781552	+	chr1	+	154809019	154809076
miRNA	hsa-novelmiR-421-5p	chr1	154781495	154781517	+	chr1	+	154809019	154809041
miRNA	hsa-novelmiR-421-3p	chr1	154781531	154781552	+	chr1	+	154809055	154809076
premiRNA	hsa-novelmir-422	chr1	154902018	154902082	+	chr1	+	154929542	154929606
miRNA	hsa-novelmiR-422-5p	chr1	154902018	154902035	+	chr1	+	154929542	154929559
miRNA	hsa-novelmiR-422-3p	chr1	154902064	154902082	+	chr1	+	154929588	154929606
premiRNA	hsa-novelmir-423	chr1	154934245	154934324	-	chr1	-	154961769	154961848
miRNA	hsa-novelmiR-423-5p	chr1	154934300	154934324	-	chr1	-	154961824	154961848
miRNA	hsa-novelmiR-423-3p	chr1	154934245	154934269	-	chr1	-	154961769	154961793
premiRNA	hsa-novelmir-424	chr1	154938975	154939019	-	chr1	-	154966499	154966543
miRNA	hsa-novelmiR-424-3p	chr1	154938975	154938995	-	chr1	-	154966499	154966519
miRNA	hsa-novelmiR-424-5p	chr1	154939001	154939019	-	chr1	-	154966525	154966543
premiRNA	hsa-novelmir-425	chr1	154973206	154973262	-	chr1	-	155000730	155000786
miRNA	hsa-novelmiR-425-5p	chr1	154973239	154973262	-	chr1	-	155000763	155000786
miRNA	hsa-novelmiR-425-3p	chr1	154973206	154973225	-	chr1	-	155000730	155000749
premiRNA	hsa-novelmir-426	chr1	154974245	154974303	+	chr1	+	155001769	155001827
miRNA	hsa-novelmiR-426-3p	chr1	154974280	154974303	+	chr1	+	155001804	155001827
miRNA	hsa-novelmiR-426-5p	chr1	154974245	154974263	+	chr1	+	155001769	155001787
premiRNA	hsa-novelmir-427	chr1	154979448	154979511	+	chr1	+	155006972	155007035
miRNA	hsa-novelmiR-427-3p	chr1	154979489	154979511	+	chr1	+	155007013	155007035
miRNA	hsa-novelmiR-427-5p	chr1	154979448	154979468	+	chr1	+	155006972	155006992
premiRNA	hsa-novelmir-428	chr1	155102821	155102890	-	chr1	-	155130345	155130414
miRNA	hsa-novelmiR-428-5p	chr1	155102872	155102890	-	chr1	-	155130396	155130414
miRNA	hsa-novelmiR-428-3p	chr1	155102821	155102844	-	chr1	-	155130345	155130368
premiRNA	hsa-novelmir-429	chr1	155177666	155177740	+	chr1	+	155207875	155207949
miRNA	hsa-novelmiR-429-3p	chr1	155177722	155177740	+	chr1	+	155207931	155207949
miRNA	hsa-novelmiR-429-5p	chr1	155177666	155177682	+	chr1	+	155207875	155207891
premiRNA	hsa-novelmir-430	chr1	155202639	155202697	-	chr1	-	155232848	155232906
miRNA	hsa-novelmiR-430-5p	chr1	155202673	155202697	-	chr1	-	155232882	155232906
miRNA	hsa-novelmiR-430-3p	chr1	155202639	155202658	-	chr1	-	155232848	155232867
premiRNA	hsa-novelmir-431	chr1	155227211	155227267	+	chr1	+	155257420	155257476
miRNA	hsa-novelmiR-431-3p	chr1	155227248	155227267	+	chr1	+	155257457	155257476
miRNA	hsa-novelmiR-431-5p	chr1	155227211	155227232	+	chr1	+	155257420	155257441
premiRNA	hsa-novelmir-432	chr1	156023838	156023912	+	chr1	+	156054047	156054121
miRNA	hsa-novelmiR-432-5p	chr1	156023838	156023855	+	chr1	+	156054047	156054064
miRNA	hsa-novelmiR-432-3p	chr1	156023894	156023912	+	chr1	+	156054103	156054121
premiRNA	hsa-novelmir-433	chr1	156045158	156045245	-	chr1	-	156075367	156075454
miRNA	hsa-novelmiR-433-5p	chr1	156045222	156045245	-	chr1	-	156075431	156075454
miRNA	hsa-novelmiR-433-3p	chr1	156045158	156045179	-	chr1	-	156075367	156075388
premiRNA	hsa-novelmir-434	chr1	156056329	156056401	+	chr1	+	156086538	156086610
miRNA	hsa-novelmiR-434-3p	chr1	156056383	156056401	+	chr1	+	156086592	156086610
miRNA	hsa-novelmiR-434-5p	chr1	156056329	156056346	+	chr1	+	156086538	156086555
premiRNA	hsa-novelmir-435	chr1	156123642	156123699	-	chr1	-	156153851	156153908
miRNA	hsa-novelmiR-435-3p	chr1	156123642	156123662	-	chr1	-	156153851	156153871
miRNA	hsa-novelmiR-435-5p	chr1	156123678	156123699	-	chr1	-	156153887	156153908
premiRNA	hsa-novelmir-436	chr1	156146910	156146963	+	chr1	+	156177119	156177172
miRNA	hsa-novelmiR-436-3p	chr1	156146943	156146963	+	chr1	+	156177152	156177172
miRNA	hsa-novelmiR-436-5p	chr1	156146910	156146931	+	chr1	+	156177119	156177140
premiRNA	hsa-novelmir-437	chr1	156181033	156181086	+	chr1	+	156211242	156211295
miRNA	hsa-novelmiR-437-3p	chr1	156181063	156181086	+	chr1	+	156211272	156211295
miRNA	hsa-novelmiR-437-5p	chr1	156181033	156181059	+	chr1	+	156211242	156211268
premiRNA	hsa-novelmir-438	chr1	156500234	156500279	-	chr1	-	156530442	156530487
miRNA	hsa-novelmiR-438-3p	chr1	156500234	156500254	-	chr1	-	156530442	156530462
miRNA	hsa-novelmiR-438-5p	chr1	156500261	156500279	-	chr1	-	156530469	156530487
premiRNA	hsa-novelmir-439	chr1	156510708	156510774	-	chr1	-	156540916	156540982
miRNA	hsa-novelmiR-439-3p	chr1	156510708	156510729	-	chr1	-	156540916	156540937
miRNA	hsa-novelmiR-439-5p	chr1	156510754	156510774	-	chr1	-	156540962	156540982
premiRNA	hsa-novelmir-440	chr1	156562166	156562216	-	chr1	-	156592374	156592424
miRNA	hsa-novelmiR-440-3p	chr1	156562166	156562183	-	chr1	-	156592374	156592391
miRNA	hsa-novelmiR-440-5p	chr1	156562196	156562216	-	chr1	-	156592404	156592424
premiRNA	hsa-novelmir-441	chr1	156637710	156637771	-	chr1	-	156667918	156667979
miRNA	hsa-novelmiR-441-5p	chr1	156637749	156637771	-	chr1	-	156667957	156667979
miRNA	hsa-novelmiR-441-3p	chr1	156637710	156637737	-	chr1	-	156667918	156667945
premiRNA	hsa-novelmir-442	chr1	156670886	156670967	-	chr1	-	156701094	156701175
miRNA	hsa-novelmiR-442-3p	chr1	156670886	156670910	-	chr1	-	156701094	156701118
miRNA	hsa-novelmiR-442-5p	chr1	156670942	156670967	-	chr1	-	156701150	156701175
premiRNA	hsa-novelmir-443	chr1	156882583	156882638	+	chr1	+	156912791	156912846
miRNA	hsa-novelmiR-443-5p	chr1	156882583	156882604	+	chr1	+	156912791	156912812
miRNA	hsa-novelmiR-443-3p	chr1	156882616	156882638	+	chr1	+	156912824	156912846
premiRNA	hsa-novelmir-444	chr1	157043767	157043829	+	chr1	+	157073975	157074037
miRNA	hsa-novelmiR-444-5p	chr1	157043767	157043789	+	chr1	+	157073975	157073997
miRNA	hsa-novelmiR-444-3p	chr1	157043812	157043829	+	chr1	+	157074020	157074037
premiRNA	hsa-novelmir-445	chr1	159189345	159189393	+	chr1	+	159219555	159219603
miRNA	hsa-novelmiR-445-5p	chr1	159189345	159189365	+	chr1	+	159219555	159219575
miRNA	hsa-novelmiR-445-3p	chr1	159189374	159189393	+	chr1	+	159219584	159219603
premiRNA	hsa-novelmir-446	chr1	159878375	159878451	-	chr1	-	159908585	159908661
miRNA	hsa-novelmiR-446-3p	chr1	159878375	159878396	-	chr1	-	159908585	159908606
miRNA	hsa-novelmiR-446-5p	chr1	159878429	159878451	-	chr1	-	159908639	159908661
premiRNA	hsa-novelmir-447	chr1	160040797	160040855	+	chr1	+	160071007	160071065
miRNA	hsa-novelmiR-447-5p	chr1	160040797	160040818	+	chr1	+	160071007	160071028
miRNA	hsa-novelmiR-447-3p	chr1	160040834	160040855	+	chr1	+	160071044	160071065
premiRNA	hsa-novelmir-448	chr1	160312277	160312334	-	chr1	-	160342487	160342544
miRNA	hsa-novelmiR-448-3p	chr1	160312277	160312299	-	chr1	-	160342487	160342509
miRNA	hsa-novelmiR-448-5p	chr1	160312313	160312334	-	chr1	-	160342523	160342544
premiRNA	hsa-novelmir-449	chr1	160473176	160473232	-	chr1	-	160503386	160503442
miRNA	hsa-novelmiR-449-5p	chr1	160473212	160473232	-	chr1	-	160503422	160503442
miRNA	hsa-novelmiR-449-3p	chr1	160473176	160473197	-	chr1	-	160503386	160503407
premiRNA	hsa-novelmir-450	chr1	161140818	161140871	-	chr1	-	161171028	161171081
miRNA	hsa-novelmiR-450-5p	chr1	161140852	161140871	-	chr1	-	161171062	161171081
miRNA	hsa-novelmiR-450-3p	chr1	161140818	161140841	-	chr1	-	161171028	161171051
premiRNA	hsa-novelmir-451	chr1	161160935	161161003	-	chr1	-	161191145	161191213
miRNA	hsa-novelmiR-451-5p	chr1	161160980	161161003	-	chr1	-	161191190	161191213
miRNA	hsa-novelmiR-451-3p	chr1	161160935	161160959	-	chr1	-	161191145	161191169
premiRNA	hsa-novelmir-452	chr1	161339226	161339276	+	chr1	+	161369436	161369486
miRNA	hsa-novelmiR-452-3p	chr1	161339256	161339276	+	chr1	+	161369466	161369486
miRNA	hsa-novelmiR-452-5p	chr1	161339226	161339248	+	chr1	+	161369436	161369458
premiRNA	hsa-novelmir-453	chr1	161706557	161706611	-	chr1	-	161736767	161736821
miRNA	hsa-novelmiR-453-5p	chr1	161706590	161706611	-	chr1	-	161736800	161736821
miRNA	hsa-novelmiR-453-3p	chr1	161706557	161706578	-	chr1	-	161736767	161736788
premiRNA	hsa-novelmir-454	chr1	161706559	161706613	+	chr1	+	161736769	161736823
miRNA	hsa-novelmiR-454-5p	chr1	161706559	161706580	+	chr1	+	161736769	161736790
miRNA	hsa-novelmiR-454-3p	chr1	161706592	161706613	+	chr1	+	161736802	161736823
premiRNA	hsa-novelmir-455	chr1	161774779	161774852	+	chr1	+	161804989	161805062
miRNA	hsa-novelmiR-455-5p	chr1	161774779	161774800	+	chr1	+	161804989	161805010
miRNA	hsa-novelmiR-455-3p	chr1	161774831	161774852	+	chr1	+	161805041	161805062
premiRNA	hsa-novelmir-456	chr1	162130195	162130257	+	chr1	+	162160405	162160467
miRNA	hsa-novelmiR-456-3p	chr1	162130237	162130257	+	chr1	+	162160447	162160467
miRNA	hsa-novelmiR-456-5p	chr1	162130195	162130215	+	chr1	+	162160405	162160425
premiRNA	hsa-novelmir-457	chr1	164552657	164552732	+	chr1	+	164583420	164583495
miRNA	hsa-novelmiR-457-3p	chr1	164552708	164552732	+	chr1	+	164583471	164583495
miRNA	hsa-novelmiR-457-5p	chr1	164552657	164552681	+	chr1	+	164583420	164583444
premiRNA	hsa-novelmir-458	chr1	164558746	164558812	-	chr1	-	164589509	164589575
miRNA	hsa-novelmiR-458-3p	chr1	164558746	164558768	-	chr1	-	164589509	164589531
miRNA	hsa-novelmiR-458-5p	chr1	164558791	164558812	-	chr1	-	164589554	164589575
premiRNA	hsa-novelmir-459	chr1	164561096	164561152	+	chr1	+	164591859	164591915
miRNA	hsa-novelmiR-459-5p	chr1	164561096	164561120	+	chr1	+	164591859	164591883
miRNA	hsa-novelmiR-459-3p	chr1	164561129	164561152	+	chr1	+	164591892	164591915
premiRNA	hsa-novelmir-460	chr1	164611934	164612000	+	chr1	+	164642697	164642763
miRNA	hsa-novelmiR-460-3p	chr1	164611980	164612000	+	chr1	+	164642743	164642763
miRNA	hsa-novelmiR-460-5p	chr1	164611934	164611954	+	chr1	+	164642697	164642717
premiRNA	hsa-novelmir-461	chr1	164644592	164644647	+	chr1	+	164675355	164675410
miRNA	hsa-novelmiR-461-5p	chr1	164644592	164644612	+	chr1	+	164675355	164675375
miRNA	hsa-novelmiR-461-3p	chr1	164644626	164644647	+	chr1	+	164675389	164675410
premiRNA	hsa-novelmir-462	chr1	165879475	165879557	+	chr1	+	165910238	165910320
miRNA	hsa-novelmiR-462-5p	chr1	165879475	165879494	+	chr1	+	165910238	165910257
miRNA	hsa-novelmiR-462-3p	chr1	165879538	165879557	+	chr1	+	165910301	165910320
premiRNA	hsa-novelmir-463	chr1	166135447	166135498	-	chr1	-	166166210	166166261
miRNA	hsa-novelmiR-463-5p	chr1	166135481	166135498	-	chr1	-	166166244	166166261
miRNA	hsa-novelmiR-463-3p	chr1	166135447	166135465	-	chr1	-	166166210	166166228
premiRNA	hsa-novelmir-464	chr1	167090836	167090876	-	chr1	-	167121599	167121639
miRNA	hsa-novelmiR-464-3p	chr1	167090836	167090854	-	chr1	-	167121599	167121617
miRNA	hsa-novelmiR-464-5p	chr1	167090856	167090876	-	chr1	-	167121619	167121639
premiRNA	hsa-novelmir-465	chr1	167198913	167198965	+	chr1	+	167229676	167229728
miRNA	hsa-novelmiR-465-3p	chr1	167198941	167198965	+	chr1	+	167229704	167229728
miRNA	hsa-novelmiR-465-5p	chr1	167198913	167198937	+	chr1	+	167229676	167229700
premiRNA	hsa-novelmir-466	chr1	167386023	167386081	+	chr1	+	167416786	167416844
miRNA	hsa-novelmiR-466-3p	chr1	167386059	167386081	+	chr1	+	167416822	167416844
miRNA	hsa-novelmiR-466-5p	chr1	167386023	167386043	+	chr1	+	167416786	167416806
premiRNA	hsa-novelmir-467	chr1	167440521	167440584	-	chr1	-	167471284	167471347
miRNA	hsa-novelmiR-467-3p	chr1	167440521	167440542	-	chr1	-	167471284	167471305
miRNA	hsa-novelmiR-467-5p	chr1	167440563	167440584	-	chr1	-	167471326	167471347
premiRNA	hsa-novelmir-468	chr1	167458918	167458953	-	chr1	-	167489681	167489716
miRNA	hsa-novelmiR-468-3p	chr1	167458918	167458935	-	chr1	-	167489681	167489698
miRNA	hsa-novelmiR-468-5p	chr1	167458937	167458953	-	chr1	-	167489700	167489716
premiRNA	hsa-novelmir-469	chr1	168007885	168007946	+	chr1	+	168038647	168038708
miRNA	hsa-novelmiR-469-5p	chr1	168007885	168007906	+	chr1	+	168038647	168038668
miRNA	hsa-novelmiR-469-3p	chr1	168007925	168007946	+	chr1	+	168038687	168038708
premiRNA	hsa-novelmir-470	chr1	168110324	168110408	-	chr1	-	168141086	168141170
miRNA	hsa-novelmiR-470-3p	chr1	168110324	168110345	-	chr1	-	168141086	168141107
miRNA	hsa-novelmiR-470-5p	chr1	168110385	168110408	-	chr1	-	168141147	168141170
premiRNA	hsa-novelmir-471	chr1	168310463	168310526	-	chr1	-	168341225	168341288
miRNA	hsa-novelmiR-471-3p	chr1	168310463	168310483	-	chr1	-	168341225	168341245
miRNA	hsa-novelmiR-471-5p	chr1	168310506	168310526	-	chr1	-	168341268	168341288
premiRNA	hsa-novelmir-472	chr1	168340581	168340635	+	chr1	+	168371343	168371397
miRNA	hsa-novelmiR-472-5p	chr1	168340581	168340601	+	chr1	+	168371343	168371363
miRNA	hsa-novelmiR-472-3p	chr1	168340616	168340635	+	chr1	+	168371378	168371397
premiRNA	hsa-novelmir-473	chr1	168490314	168490372	+	chr1	+	168521076	168521134
miRNA	hsa-novelmiR-473-5p	chr1	168490314	168490335	+	chr1	+	168521076	168521097
miRNA	hsa-novelmiR-473-3p	chr1	168490350	168490372	+	chr1	+	168521112	168521134
premiRNA	hsa-novelmir-474	chr1	169228107	169228176	-	chr1	-	169258869	169258938
miRNA	hsa-novelmiR-474-3p	chr1	169228107	169228128	-	chr1	-	169258869	169258890
miRNA	hsa-novelmiR-474-5p	chr1	169228156	169228176	-	chr1	-	169258918	169258938
premiRNA	hsa-novelmir-475	chr1	169680740	169680805	-	chr1	-	169711599	169711664
miRNA	hsa-novelmiR-475-3p	chr1	169680740	169680758	-	chr1	-	169711599	169711617
miRNA	hsa-novelmiR-475-5p	chr1	169680786	169680805	-	chr1	-	169711645	169711664
premiRNA	hsa-novelmir-476	chr1	169763128	169763192	-	chr1	-	169793987	169794051
miRNA	hsa-novelmiR-476-5p	chr1	169763172	169763192	-	chr1	-	169794031	169794051
miRNA	hsa-novelmiR-476-3p	chr1	169763128	169763151	-	chr1	-	169793987	169794010
premiRNA	hsa-novelmir-477	chr1	169817403	169817457	-	chr1	-	169848262	169848316
miRNA	hsa-novelmiR-477-3p	chr1	169817403	169817423	-	chr1	-	169848262	169848282
miRNA	hsa-novelmiR-477-5p	chr1	169817437	169817457	-	chr1	-	169848296	169848316
premiRNA	hsa-novelmir-478	chr1	169817404	169817461	+	chr1	+	169848263	169848320
miRNA	hsa-novelmiR-478-5p	chr1	169817404	169817425	+	chr1	+	169848263	169848284
miRNA	hsa-novelmiR-478-3p	chr1	169817441	169817461	+	chr1	+	169848300	169848320
premiRNA	hsa-novelmir-479	chr1	169825260	169825325	+	chr1	+	169856119	169856184
miRNA	hsa-novelmiR-479-5p	chr1	169825260	169825278	+	chr1	+	169856119	169856137
miRNA	hsa-novelmiR-479-3p	chr1	169825305	169825325	+	chr1	+	169856164	169856184
premiRNA	hsa-novelmir-480	chr1	170649590	170649649	+	chr1	+	170680449	170680508
miRNA	hsa-novelmiR-480-3p	chr1	170649628	170649649	+	chr1	+	170680487	170680508
miRNA	hsa-novelmiR-480-5p	chr1	170649590	170649611	+	chr1	+	170680449	170680470
premiRNA	hsa-novelmir-481	chr1	171217988	171218050	+	chr1	+	171248849	171248911
miRNA	hsa-novelmiR-481-3p	chr1	171218029	171218050	+	chr1	+	171248890	171248911
miRNA	hsa-novelmiR-481-5p	chr1	171217988	171218009	+	chr1	+	171248849	171248870
premiRNA	hsa-novelmir-482	chr1	171560222	171560286	+	chr1	+	171591083	171591147
miRNA	hsa-novelmiR-482-3p	chr1	171560265	171560286	+	chr1	+	171591126	171591147
miRNA	hsa-novelmiR-482-5p	chr1	171560222	171560244	+	chr1	+	171591083	171591105
premiRNA	hsa-novelmir-483	chr1	171751139	171751213	+	chr1	+	171781999	171782073
miRNA	hsa-novelmiR-483-3p	chr1	171751192	171751213	+	chr1	+	171782052	171782073
miRNA	hsa-novelmiR-483-5p	chr1	171751139	171751162	+	chr1	+	171781999	171782022
premiRNA	hsa-novelmir-484	chr1	172113694	172113756	+	chr1	+	172144554	172144616
miRNA	hsa-novelmiR-484-5p	chr1	172113694	172113715	+	chr1	+	172144554	172144575
miRNA	hsa-novelmiR-484-3p	chr1	172113735	172113756	+	chr1	+	172144595	172144616
premiRNA	hsa-novelmir-485	chr1	173828593	173828668	-	chr1	-	173859455	173859530
miRNA	hsa-novelmiR-485-3p	chr1	173828593	173828613	-	chr1	-	173859455	173859475
miRNA	hsa-novelmiR-485-5p	chr1	173828648	173828668	-	chr1	-	173859510	173859530
premiRNA	hsa-novelmir-486	chr1	174087649	174087699	-	chr1	-	174118511	174118561
miRNA	hsa-novelmiR-486-3p	chr1	174087649	174087669	-	chr1	-	174118511	174118531
miRNA	hsa-novelmiR-486-5p	chr1	174087681	174087699	-	chr1	-	174118543	174118561
premiRNA	hsa-novelmir-487	chr1	174250388	174250450	+	chr1	+	174281250	174281312
miRNA	hsa-novelmiR-487-3p	chr1	174250429	174250450	+	chr1	+	174281291	174281312
miRNA	hsa-novelmiR-487-5p	chr1	174250388	174250407	+	chr1	+	174281250	174281269
premiRNA	hsa-novelmir-488	chr1	174317421	174317479	+	chr1	+	174348283	174348341
miRNA	hsa-novelmiR-488-3p	chr1	174317458	174317479	+	chr1	+	174348320	174348341
miRNA	hsa-novelmiR-488-5p	chr1	174317421	174317440	+	chr1	+	174348283	174348302
premiRNA	hsa-novelmir-489	chr1	176437386	176437443	+	chr1	+	176468250	176468307
miRNA	hsa-novelmiR-489-5p	chr1	176437386	176437404	+	chr1	+	176468250	176468268
miRNA	hsa-novelmiR-489-3p	chr1	176437422	176437443	+	chr1	+	176468286	176468307
premiRNA	hsa-novelmir-490	chr1	176539805	176539885	-	chr1	-	176570669	176570749
miRNA	hsa-novelmiR-490-5p	chr1	176539865	176539885	-	chr1	-	176570729	176570749
miRNA	hsa-novelmiR-490-3p	chr1	176539805	176539825	-	chr1	-	176570669	176570689
premiRNA	hsa-novelmir-491	chr1	178646896	178646955	-	chr1	-	178677761	178677820
miRNA	hsa-novelmiR-491-3p	chr1	178646896	178646917	-	chr1	-	178677761	178677782
miRNA	hsa-novelmiR-491-5p	chr1	178646935	178646955	-	chr1	-	178677800	178677820
premiRNA	hsa-novelmir-492	chr1	178694248	178694301	-	chr1	-	178725113	178725166
miRNA	hsa-novelmiR-492-3p	chr1	178694248	178694269	-	chr1	-	178725113	178725134
miRNA	hsa-novelmiR-492-5p	chr1	178694279	178694301	-	chr1	-	178725144	178725166
premiRNA	hsa-novelmir-493	chr1	178712690	178712746	+	chr1	+	178743555	178743611
miRNA	hsa-novelmiR-493-3p	chr1	178712726	178712746	+	chr1	+	178743591	178743611
miRNA	hsa-novelmiR-493-5p	chr1	178712690	178712708	+	chr1	+	178743555	178743573
premiRNA	hsa-novelmir-494	chr1	179054757	179054825	-	chr1	-	179085622	179085690
miRNA	hsa-novelmiR-494-5p	chr1	179054806	179054825	-	chr1	-	179085671	179085690
miRNA	hsa-novelmiR-494-3p	chr1	179054757	179054775	-	chr1	-	179085622	179085640
premiRNA	hsa-novelmir-495	chr1	180153052	180153104	+	chr1	+	180183917	180183969
miRNA	hsa-novelmiR-495-3p	chr1	180153086	180153104	+	chr1	+	180183951	180183969
miRNA	hsa-novelmiR-495-5p	chr1	180153052	180153066	+	chr1	+	180183917	180183931
premiRNA	hsa-novelmir-496	chr1	180768894	180768949	+	chr1	+	180799758	180799813
miRNA	hsa-novelmiR-496-3p	chr1	180768928	180768949	+	chr1	+	180799792	180799813
miRNA	hsa-novelmiR-496-5p	chr1	180768894	180768915	+	chr1	+	180799758	180799779
premiRNA	hsa-novelmir-497	chr1	181076707	181076759	+	chr1	+	181107571	181107623
miRNA	hsa-novelmiR-497-5p	chr1	181076707	181076728	+	chr1	+	181107571	181107592
miRNA	hsa-novelmiR-497-3p	chr1	181076738	181076759	+	chr1	+	181107602	181107623
premiRNA	hsa-novelmir-498	chr1	182360404	182360480	-	chr1	-	182391269	182391345
miRNA	hsa-novelmiR-498-5p	chr1	182360459	182360480	-	chr1	-	182391324	182391345
miRNA	hsa-novelmiR-498-3p	chr1	182360404	182360427	-	chr1	-	182391269	182391292
premiRNA	hsa-novelmir-499	chr1	182360851	182360925	-	chr1	-	182391716	182391790
miRNA	hsa-novelmiR-499-3p	chr1	182360851	182360871	-	chr1	-	182391716	182391736
miRNA	hsa-novelmiR-499-5p	chr1	182360905	182360925	-	chr1	-	182391770	182391790
premiRNA	hsa-novelmir-500	chr1	183213920	183213997	+	chr1	+	183244785	183244862
miRNA	hsa-novelmiR-500-5p	chr1	183213920	183213944	+	chr1	+	183244785	183244809
miRNA	hsa-novelmiR-500-3p	chr1	183213973	183213997	+	chr1	+	183244838	183244862
premiRNA	hsa-novelmir-501	chr1	183268418	183268507	+	chr1	+	183299283	183299372
miRNA	hsa-novelmiR-501-3p	chr1	183268485	183268507	+	chr1	+	183299350	183299372
miRNA	hsa-novelmiR-501-5p	chr1	183268418	183268438	+	chr1	+	183299283	183299303
premiRNA	hsa-novelmir-502	chr1	183752482	183752540	+	chr1	+	183783347	183783405
miRNA	hsa-novelmiR-502-5p	chr1	183752482	183752503	+	chr1	+	183783347	183783368
miRNA	hsa-novelmiR-502-3p	chr1	183752521	183752540	+	chr1	+	183783386	183783405
premiRNA	hsa-novelmir-503	chr1	185377127	185377190	+	chr1	+	185407995	185408058
miRNA	hsa-novelmiR-503-3p	chr1	185377169	185377190	+	chr1	+	185408037	185408058
miRNA	hsa-novelmiR-503-5p	chr1	185377127	185377148	+	chr1	+	185407995	185408016
premiRNA	hsa-novelmir-504	chr1	186575240	186575322	+	chr1	+	186606108	186606190
miRNA	hsa-novelmiR-504-5p	chr1	186575240	186575259	+	chr1	+	186606108	186606127
miRNA	hsa-novelmiR-504-3p	chr1	186575299	186575322	+	chr1	+	186606167	186606190
premiRNA	hsa-novelmir-505	chr1	190342937	190342986	+	chr1	+	190373807	190373856
miRNA	hsa-novelmiR-505-3p	chr1	190342965	190342986	+	chr1	+	190373835	190373856
miRNA	hsa-novelmiR-505-5p	chr1	190342937	190342957	+	chr1	+	190373807	190373827
premiRNA	hsa-novelmir-506	chr1	193126397	193126455	+	chr1	+	193157267	193157325
miRNA	hsa-novelmiR-506-5p	chr1	193126397	193126418	+	chr1	+	193157267	193157288
miRNA	hsa-novelmiR-506-3p	chr1	193126433	193126455	+	chr1	+	193157303	193157325
premiRNA	hsa-novelmir-507	chr1	198130953	198131016	-	chr1	-	198161823	198161886
miRNA	hsa-novelmiR-507-3p	chr1	198130953	198130973	-	chr1	-	198161823	198161843
miRNA	hsa-novelmiR-507-5p	chr1	198130996	198131016	-	chr1	-	198161866	198161886
premiRNA	hsa-novelmir-508	chr1	198338444	198338501	+	chr1	+	198369314	198369371
miRNA	hsa-novelmiR-508-5p	chr1	198338444	198338465	+	chr1	+	198369314	198369335
miRNA	hsa-novelmiR-508-3p	chr1	198338480	198338501	+	chr1	+	198369350	198369371
premiRNA	hsa-novelmir-509	chr1	198803511	198803570	-	chr1	-	198834382	198834441
miRNA	hsa-novelmiR-509-3p	chr1	198803511	198803531	-	chr1	-	198834382	198834402
miRNA	hsa-novelmiR-509-5p	chr1	198803549	198803570	-	chr1	-	198834420	198834441
premiRNA	hsa-novelmir-510	chr1	199093325	199093386	-	chr1	-	199124197	199124258
miRNA	hsa-novelmiR-510-3p	chr1	199093325	199093346	-	chr1	-	199124197	199124218
miRNA	hsa-novelmiR-510-5p	chr1	199093364	199093386	-	chr1	-	199124236	199124258
premiRNA	hsa-novelmir-511	chr1	199177025	199177092	+	chr1	+	199207897	199207964
miRNA	hsa-novelmiR-511-3p	chr1	199177075	199177092	+	chr1	+	199207947	199207964
miRNA	hsa-novelmiR-511-5p	chr1	199177025	199177042	+	chr1	+	199207897	199207914
premiRNA	hsa-novelmir-512	chr1	200121241	200121300	+	chr1	+	200152113	200152172
miRNA	hsa-novelmiR-512-5p	chr1	200121241	200121258	+	chr1	+	200152113	200152130
miRNA	hsa-novelmiR-512-3p	chr1	200121281	200121300	+	chr1	+	200152153	200152172
premiRNA	hsa-novelmir-513	chr1	200376484	200376543	-	chr1	-	200407356	200407415
miRNA	hsa-novelmiR-513-3p	chr1	200376484	200376505	-	chr1	-	200407356	200407377
miRNA	hsa-novelmiR-513-5p	chr1	200376522	200376543	-	chr1	-	200407394	200407415
premiRNA	hsa-novelmir-514	chr1	200708180	200708264	-	chr1	-	200739052	200739136
miRNA	hsa-novelmiR-514-5p	chr1	200708247	200708264	-	chr1	-	200739119	200739136
miRNA	hsa-novelmiR-514-3p	chr1	200708180	200708197	-	chr1	-	200739052	200739069
premiRNA	hsa-novelmir-515	chr1	200960856	200960914	-	chr1	-	200991728	200991786
miRNA	hsa-novelmiR-515-5p	chr1	200960893	200960914	-	chr1	-	200991765	200991786
miRNA	hsa-novelmiR-515-3p	chr1	200960856	200960877	-	chr1	-	200991728	200991749
premiRNA	hsa-novelmir-516	chr1	201168724	201168782	-	chr1	-	201199596	201199654
miRNA	hsa-novelmiR-516-3p	chr1	201168724	201168745	-	chr1	-	201199596	201199617
miRNA	hsa-novelmiR-516-5p	chr1	201168759	201168782	-	chr1	-	201199631	201199654
premiRNA	hsa-novelmir-517	chr1	201355679	201355732	-	chr1	-	201386551	201386604
miRNA	hsa-novelmiR-517-5p	chr1	201355713	201355732	-	chr1	-	201386585	201386604
miRNA	hsa-novelmiR-517-3p	chr1	201355679	201355698	-	chr1	-	201386551	201386570
premiRNA	hsa-novelmir-518	chr1	201435954	201436031	-	chr1	-	201466826	201466903
miRNA	hsa-novelmiR-518-5p	chr1	201436007	201436031	-	chr1	-	201466879	201466903
miRNA	hsa-novelmiR-518-3p	chr1	201435954	201435974	-	chr1	-	201466826	201466846
premiRNA	hsa-novelmir-519	chr1	201719865	201719923	-	chr1	-	201750737	201750795
miRNA	hsa-novelmiR-519-5p	chr1	201719902	201719923	-	chr1	-	201750774	201750795
miRNA	hsa-novelmiR-519-3p	chr1	201719865	201719884	-	chr1	-	201750737	201750756
premiRNA	hsa-novelmir-520	chr1	201858005	201858082	+	chr1	+	201888877	201888954
miRNA	hsa-novelmiR-520-3p	chr1	201858061	201858082	+	chr1	+	201888933	201888954
miRNA	hsa-novelmiR-520-5p	chr1	201858005	201858029	+	chr1	+	201888877	201888901
premiRNA	hsa-novelmir-521	chr1	201927748	201927806	+	chr1	+	201958620	201958678
miRNA	hsa-novelmiR-521-5p	chr1	201927748	201927772	+	chr1	+	201958620	201958644
miRNA	hsa-novelmiR-521-3p	chr1	201927786	201927806	+	chr1	+	201958658	201958678
premiRNA	hsa-novelmir-522	chr1	202269554	202269607	-	chr1	-	202300426	202300479
miRNA	hsa-novelmiR-522-5p	chr1	202269585	202269607	-	chr1	-	202300457	202300479
miRNA	hsa-novelmiR-522-3p	chr1	202269554	202269575	-	chr1	-	202300426	202300447
premiRNA	hsa-novelmir-523	chr1	202325976	202326056	-	chr1	-	202356848	202356928
miRNA	hsa-novelmiR-523-5p	chr1	202326039	202326056	-	chr1	-	202356911	202356928
miRNA	hsa-novelmiR-523-3p	chr1	202325976	202325994	-	chr1	-	202356848	202356866
premiRNA	hsa-novelmir-524	chr1	202764751	202764811	-	chr1	-	202795623	202795683
miRNA	hsa-novelmiR-524-5p	chr1	202764793	202764811	-	chr1	-	202795665	202795683
miRNA	hsa-novelmiR-524-3p	chr1	202764751	202764772	-	chr1	-	202795623	202795644
premiRNA	hsa-novelmir-525	chr1	203472672	203472724	-	chr1	-	203503544	203503596
miRNA	hsa-novelmiR-525-5p	chr1	203472704	203472724	-	chr1	-	203503576	203503596
miRNA	hsa-novelmiR-525-3p	chr1	203472672	203472696	-	chr1	-	203503544	203503568
premiRNA	hsa-novelmir-526	chr1	203768836	203768905	+	chr1	+	203799708	203799777
miRNA	hsa-novelmiR-526-3p	chr1	203768882	203768905	+	chr1	+	203799754	203799777
miRNA	hsa-novelmiR-526-5p	chr1	203768836	203768858	+	chr1	+	203799708	203799730
premiRNA	hsa-novelmir-527	chr1	204071883	204071948	-	chr1	-	204102755	204102820
miRNA	hsa-novelmiR-527-3p	chr1	204071883	204071904	-	chr1	-	204102755	204102776
miRNA	hsa-novelmiR-527-5p	chr1	204071925	204071948	-	chr1	-	204102797	204102820
premiRNA	hsa-novelmir-528	chr1	204086302	204086363	+	chr1	+	204117174	204117235
miRNA	hsa-novelmiR-528-5p	chr1	204086302	204086325	+	chr1	+	204117174	204117197
miRNA	hsa-novelmiR-528-3p	chr1	204086343	204086363	+	chr1	+	204117215	204117235
premiRNA	hsa-novelmir-529	chr1	204378736	204378800	-	chr1	-	204409608	204409672
miRNA	hsa-novelmiR-529-5p	chr1	204378778	204378800	-	chr1	-	204409650	204409672
miRNA	hsa-novelmiR-529-3p	chr1	204378736	204378760	-	chr1	-	204409608	204409632
premiRNA	hsa-novelmir-530	chr1	204622244	204622299	-	chr1	-	204653116	204653171
miRNA	hsa-novelmiR-530-3p	chr1	204622244	204622264	-	chr1	-	204653116	204653136
miRNA	hsa-novelmiR-530-5p	chr1	204622278	204622299	-	chr1	-	204653150	204653171
premiRNA	hsa-novelmir-531	chr1	204965456	204965515	+	chr1	+	204996328	204996387
miRNA	hsa-novelmiR-531-3p	chr1	204965493	204965515	+	chr1	+	204996365	204996387
miRNA	hsa-novelmiR-531-5p	chr1	204965456	204965476	+	chr1	+	204996328	204996348
premiRNA	hsa-novelmir-532	chr1	205311551	205311615	+	chr1	+	205342423	205342487
miRNA	hsa-novelmiR-532-5p	chr1	205311551	205311570	+	chr1	+	205342423	205342442
miRNA	hsa-novelmiR-532-3p	chr1	205311594	205311615	+	chr1	+	205342466	205342487
premiRNA	hsa-novelmir-533	chr1	205405998	205406043	-	chr1	-	205436870	205436915
miRNA	hsa-novelmiR-533-5p	chr1	205406026	205406043	-	chr1	-	205436898	205436915
miRNA	hsa-novelmiR-533-3p	chr1	205405998	205406010	-	chr1	-	205436870	205436882
premiRNA	hsa-novelmir-534	chr1	205407546	205407627	-	chr1	-	205438418	205438499
miRNA	hsa-novelmiR-534-3p	chr1	205407546	205407563	-	chr1	-	205438418	205438435
miRNA	hsa-novelmiR-534-5p	chr1	205407612	205407627	-	chr1	-	205438484	205438499
premiRNA	hsa-novelmir-535	chr1	205718851	205718936	-	chr1	-	205749723	205749808
miRNA	hsa-novelmiR-535-5p	chr1	205718913	205718936	-	chr1	-	205749785	205749808
miRNA	hsa-novelmiR-535-3p	chr1	205718851	205718874	-	chr1	-	205749723	205749746
premiRNA	hsa-novelmir-536	chr1	205799703	205799752	+	chr1	+	205830575	205830624
miRNA	hsa-novelmiR-536-5p	chr1	205799703	205799724	+	chr1	+	205830575	205830596
miRNA	hsa-novelmiR-536-3p	chr1	205799732	205799752	+	chr1	+	205830604	205830624
premiRNA	hsa-novelmir-537	chr1	206207686	206207742	+	chr1	-	206133589	206133645
miRNA	hsa-novelmiR-537-3p	chr1	206207719	206207742	+	chr1	-	206133589	206133612
miRNA	hsa-novelmiR-537-5p	chr1	206207686	206207708	+	chr1	-	206133623	206133645
premiRNA	hsa-novelmir-538	chr1	206652689	206652766	+	chr1	+	206479346	206479423
miRNA	hsa-novelmiR-538-5p	chr1	206652689	206652713	+	chr1	+	206479346	206479370
miRNA	hsa-novelmiR-538-3p	chr1	206652741	206652766	+	chr1	+	206479398	206479423
premiRNA	hsa-novelmir-539	chr1	206666689	206666749	+	chr1	+	206493356	206493416
miRNA	hsa-novelmiR-539-5p	chr1	206666689	206666710	+	chr1	+	206493356	206493377
miRNA	hsa-novelmiR-539-3p	chr1	206666723	206666749	+	chr1	+	206493390	206493416
premiRNA	hsa-novelmir-540	chr1	206773437	206773530	-	chr1	-	206600083	206600176
miRNA	hsa-novelmiR-540-3p	chr1	206773437	206773461	-	chr1	-	206600083	206600107
miRNA	hsa-novelmiR-540-5p	chr1	206773508	206773530	-	chr1	-	206600154	206600176
premiRNA	hsa-novelmir-541	chr1	206824875	206824926	+	chr1	+	206651530	206651581
miRNA	hsa-novelmiR-541-3p	chr1	206824906	206824926	+	chr1	+	206651561	206651581
miRNA	hsa-novelmiR-541-5p	chr1	206824875	206824895	+	chr1	+	206651530	206651550
premiRNA	hsa-novelmir-542	chr1	206880202	206880264	+	chr1	+	206706857	206706919
miRNA	hsa-novelmiR-542-5p	chr1	206880202	206880219	+	chr1	+	206706857	206706874
miRNA	hsa-novelmiR-542-3p	chr1	206880247	206880264	+	chr1	+	206706902	206706919
premiRNA	hsa-novelmir-543	chr1	206898464	206898522	+	chr1	+	206725119	206725177
miRNA	hsa-novelmiR-543-5p	chr1	206898464	206898484	+	chr1	+	206725119	206725139
miRNA	hsa-novelmiR-543-3p	chr1	206898501	206898522	+	chr1	+	206725156	206725177
premiRNA	hsa-novelmir-544	chr1	206907406	206907475	+	chr1	+	206734061	206734130
miRNA	hsa-novelmiR-544-3p	chr1	206907454	206907475	+	chr1	+	206734109	206734130
miRNA	hsa-novelmiR-544-5p	chr1	206907406	206907426	+	chr1	+	206734061	206734081
premiRNA	hsa-novelmir-545	chr1	207498449	207498512	+	chr1	+	207325104	207325167
miRNA	hsa-novelmiR-545-3p	chr1	207498491	207498512	+	chr1	+	207325146	207325167
miRNA	hsa-novelmiR-545-5p	chr1	207498449	207498469	+	chr1	+	207325104	207325124
premiRNA	hsa-novelmir-546	chr1	207965348	207965433	+	chr1	+	207792003	207792088
miRNA	hsa-novelmiR-546-3p	chr1	207965412	207965433	+	chr1	+	207792067	207792088
miRNA	hsa-novelmiR-546-5p	chr1	207965348	207965372	+	chr1	+	207792003	207792027
premiRNA	hsa-novelmir-547	chr1	207974730	207974791	-	chr1	-	207801385	207801446
miRNA	hsa-novelmiR-547-5p	chr1	207974767	207974791	-	chr1	-	207801422	207801446
miRNA	hsa-novelmiR-547-3p	chr1	207974730	207974749	-	chr1	-	207801385	207801404
premiRNA	hsa-novelmir-548	chr1	207981233	207981273	-	chr1	-	207807888	207807928
miRNA	hsa-novelmiR-548-3p	chr1	207981233	207981250	-	chr1	-	207807888	207807905
miRNA	hsa-novelmiR-548-5p	chr1	207981255	207981273	-	chr1	-	207807910	207807928
premiRNA	hsa-novelmir-549	chr1	208060400	208060452	-	chr1	-	207887055	207887107
miRNA	hsa-novelmiR-549-3p	chr1	208060400	208060420	-	chr1	-	207887055	207887075
miRNA	hsa-novelmiR-549-5p	chr1	208060429	208060452	-	chr1	-	207887084	207887107
premiRNA	hsa-novelmir-550	chr1	208337838	208337921	-	chr1	-	208164493	208164576
miRNA	hsa-novelmiR-550-3p	chr1	208337838	208337856	-	chr1	-	208164493	208164511
miRNA	hsa-novelmiR-550-5p	chr1	208337903	208337921	-	chr1	-	208164558	208164576
premiRNA	hsa-novelmir-551	chr1	209603299	209603364	+	chr1	+	209429954	209430019
miRNA	hsa-novelmiR-551-5p	chr1	209603299	209603321	+	chr1	+	209429954	209429976
miRNA	hsa-novelmiR-551-3p	chr1	209603343	209603364	+	chr1	+	209429998	209430019
premiRNA	hsa-novelmir-552	chr1	209605311	209605370	+	chr1	+	209431966	209432025
miRNA	hsa-novelmiR-552-5p	chr1	209605311	209605335	+	chr1	+	209431966	209431990
miRNA	hsa-novelmiR-552-3p	chr1	209605350	209605370	+	chr1	+	209432005	209432025
premiRNA	hsa-novelmir-553	chr1	209606717	209606774	+	chr1	+	209433372	209433429
miRNA	hsa-novelmiR-553-5p	chr1	209606717	209606737	+	chr1	+	209433372	209433392
miRNA	hsa-novelmiR-553-3p	chr1	209606749	209606774	+	chr1	+	209433404	209433429
premiRNA	hsa-novelmir-554	chr1	209950791	209950845	+	chr1	+	209777446	209777500
miRNA	hsa-novelmiR-554-5p	chr1	209950791	209950811	+	chr1	+	209777446	209777466
miRNA	hsa-novelmiR-554-3p	chr1	209950824	209950845	+	chr1	+	209777479	209777500
premiRNA	hsa-novelmir-555	chr1	210771907	210771972	+	chr1	+	210598563	210598628
miRNA	hsa-novelmiR-555-5p	chr1	210771907	210771928	+	chr1	+	210598563	210598584
miRNA	hsa-novelmiR-555-3p	chr1	210771950	210771972	+	chr1	+	210598606	210598628
premiRNA	hsa-novelmir-556	chr1	210814770	210814827	+	chr1	+	210641426	210641483
miRNA	hsa-novelmiR-556-3p	chr1	210814807	210814827	+	chr1	+	210641463	210641483
miRNA	hsa-novelmiR-556-5p	chr1	210814770	210814790	+	chr1	+	210641426	210641446
premiRNA	hsa-novelmir-557	chr1	212497988	212498042	+	chr1	+	212324646	212324700
miRNA	hsa-novelmiR-557-3p	chr1	212498018	212498042	+	chr1	+	212324676	212324700
miRNA	hsa-novelmiR-557-5p	chr1	212497988	212498008	+	chr1	+	212324646	212324666
premiRNA	hsa-novelmir-558	chr1	212523336	212523391	-	chr1	-	212349994	212350049
miRNA	hsa-novelmiR-558-5p	chr1	212523370	212523391	-	chr1	-	212350028	212350049
miRNA	hsa-novelmiR-558-3p	chr1	212523336	212523357	-	chr1	-	212349994	212350015
premiRNA	hsa-novelmir-559	chr1	212719382	212719429	-	chr1	-	212546040	212546087
miRNA	hsa-novelmiR-559-3p	chr1	212719382	212719401	-	chr1	-	212546040	212546059
miRNA	hsa-novelmiR-559-5p	chr1	212719414	212719429	-	chr1	-	212546072	212546087
premiRNA	hsa-novelmir-560	chr1	213153807	213153892	+	chr1	+	212980465	212980550
miRNA	hsa-novelmiR-560-5p	chr1	213153807	213153826	+	chr1	+	212980465	212980484
miRNA	hsa-novelmiR-560-3p	chr1	213153874	213153892	+	chr1	+	212980532	212980550
premiRNA	hsa-novelmir-561	chr1	213154414	213154484	+	chr1	+	212981072	212981142
miRNA	hsa-novelmiR-561-5p	chr1	213154414	213154433	+	chr1	+	212981072	212981091
miRNA	hsa-novelmiR-561-3p	chr1	213154467	213154484	+	chr1	+	212981125	212981142
premiRNA	hsa-novelmir-562	chr1	214144657	214144706	-	chr1	-	213971314	213971363
miRNA	hsa-novelmiR-562-3p	chr1	214144657	214144677	-	chr1	-	213971314	213971334
miRNA	hsa-novelmiR-562-5p	chr1	214144688	214144706	-	chr1	-	213971345	213971363
premiRNA	hsa-novelmir-563	chr1	214673358	214673416	-	chr1	-	214500015	214500073
miRNA	hsa-novelmiR-563-3p	chr1	214673358	214673379	-	chr1	-	214500015	214500036
miRNA	hsa-novelmiR-563-5p	chr1	214673395	214673416	-	chr1	-	214500052	214500073
premiRNA	hsa-novelmir-564	chr1	214710164	214710221	+	chr1	+	214536821	214536878
miRNA	hsa-novelmiR-564-3p	chr1	214710200	214710221	+	chr1	+	214536857	214536878
miRNA	hsa-novelmiR-564-5p	chr1	214710164	214710185	+	chr1	+	214536821	214536842
premiRNA	hsa-novelmir-565	chr1	215761739	215761806	+	chr1	+	215588396	215588463
miRNA	hsa-novelmiR-565-3p	chr1	215761785	215761806	+	chr1	+	215588442	215588463
miRNA	hsa-novelmiR-565-5p	chr1	215761739	215761760	+	chr1	+	215588396	215588417
premiRNA	hsa-novelmir-566	chr1	216979257	216979325	-	chr1	-	216805915	216805983
miRNA	hsa-novelmiR-566-5p	chr1	216979305	216979325	-	chr1	-	216805963	216805983
miRNA	hsa-novelmiR-566-3p	chr1	216979257	216979277	-	chr1	-	216805915	216805935
premiRNA	hsa-novelmir-567	chr1	218757506	218757565	+	chr1	+	218584164	218584223
miRNA	hsa-novelmiR-567-3p	chr1	218757544	218757565	+	chr1	+	218584202	218584223
miRNA	hsa-novelmiR-567-5p	chr1	218757506	218757527	+	chr1	+	218584164	218584185
premiRNA	hsa-novelmir-568	chr1	219563096	219563150	+	chr1	+	219389754	219389808
miRNA	hsa-novelmiR-568-3p	chr1	219563130	219563150	+	chr1	+	219389788	219389808
miRNA	hsa-novelmiR-568-5p	chr1	219563096	219563116	+	chr1	+	219389754	219389774
premiRNA	hsa-novelmir-569	chr1	220291512	220291571	+	chr1	+	220118170	220118229
miRNA	hsa-novelmiR-569-3p	chr1	220291550	220291571	+	chr1	+	220118208	220118229
miRNA	hsa-novelmiR-569-5p	chr1	220291512	220291533	+	chr1	+	220118170	220118191
premiRNA	hsa-novelmir-570	chr1	220610816	220610893	-	chr1	-	220437474	220437551
miRNA	hsa-novelmiR-570-5p	chr1	220610873	220610893	-	chr1	-	220437531	220437551
miRNA	hsa-novelmiR-570-3p	chr1	220610816	220610838	-	chr1	-	220437474	220437496
premiRNA	hsa-novelmir-571	chr1	221250001	221250060	+	chr1	+	221076659	221076718
miRNA	hsa-novelmiR-571-3p	chr1	221250039	221250060	+	chr1	+	221076697	221076718
miRNA	hsa-novelmiR-571-5p	chr1	221250001	221250024	+	chr1	+	221076659	221076682
premiRNA	hsa-novelmir-572	chr1	221885483	221885545	-	chr1	-	221712141	221712203
miRNA	hsa-novelmiR-572-3p	chr1	221885483	221885504	-	chr1	-	221712141	221712162
miRNA	hsa-novelmiR-572-5p	chr1	221885522	221885545	-	chr1	-	221712180	221712203
premiRNA	hsa-novelmir-573	chr1	221987295	221987355	-	chr1	-	221813953	221814013
miRNA	hsa-novelmiR-573-3p	chr1	221987295	221987316	-	chr1	-	221813953	221813974
miRNA	hsa-novelmiR-573-5p	chr1	221987332	221987355	-	chr1	-	221813990	221814013
premiRNA	hsa-novelmir-574	chr1	222186348	222186428	-	chr1	-	222013006	222013086
miRNA	hsa-novelmiR-574-3p	chr1	222186348	222186371	-	chr1	-	222013006	222013029
miRNA	hsa-novelmiR-574-5p	chr1	222186408	222186428	-	chr1	-	222013066	222013086
premiRNA	hsa-novelmir-575	chr1	222650693	222650754	-	chr1	-	222477351	222477412
miRNA	hsa-novelmiR-575-5p	chr1	222650732	222650754	-	chr1	-	222477390	222477412
miRNA	hsa-novelmiR-575-3p	chr1	222650693	222650716	-	chr1	-	222477351	222477374
premiRNA	hsa-novelmir-576	chr1	223204296	223204380	+	chr1	+	223030954	223031038
miRNA	hsa-novelmiR-576-3p	chr1	223204356	223204380	+	chr1	+	223031014	223031038
miRNA	hsa-novelmiR-576-5p	chr1	223204296	223204315	+	chr1	+	223030954	223030973
premiRNA	hsa-novelmir-577	chr1	223212655	223212714	+	chr1	+	223039313	223039372
miRNA	hsa-novelmiR-577-3p	chr1	223212697	223212714	+	chr1	+	223039355	223039372
miRNA	hsa-novelmiR-577-5p	chr1	223212655	223212672	+	chr1	+	223039313	223039330
premiRNA	hsa-novelmir-578	chr1	223949800	223949888	+	chr1	+	223762098	223762186
miRNA	hsa-novelmiR-578-3p	chr1	223949867	223949888	+	chr1	+	223762165	223762186
miRNA	hsa-novelmiR-578-5p	chr1	223949800	223949817	+	chr1	+	223762098	223762115
premiRNA	hsa-novelmir-579	chr1	224230738	224230803	+	chr1	+	224043036	224043101
miRNA	hsa-novelmiR-579-3p	chr1	224230781	224230803	+	chr1	+	224043079	224043101
miRNA	hsa-novelmiR-579-5p	chr1	224230738	224230759	+	chr1	+	224043036	224043057
premiRNA	hsa-novelmir-580	chr1	224943961	224944040	+	chr1	+	224756259	224756338
miRNA	hsa-novelmiR-580-3p	chr1	224944018	224944040	+	chr1	+	224756316	224756338
miRNA	hsa-novelmiR-580-5p	chr1	224943961	224943983	+	chr1	+	224756259	224756281
premiRNA	hsa-novelmir-581	chr1	225963433	225963517	-	chr1	-	225775731	225775815
miRNA	hsa-novelmiR-581-3p	chr1	225963433	225963455	-	chr1	-	225775731	225775753
miRNA	hsa-novelmiR-581-5p	chr1	225963497	225963517	-	chr1	-	225775795	225775815
premiRNA	hsa-novelmir-582	chr1	226026288	226026348	-	chr1	-	225838587	225838647
miRNA	hsa-novelmiR-582-3p	chr1	226026288	226026307	-	chr1	-	225838587	225838606
miRNA	hsa-novelmiR-582-5p	chr1	226026332	226026348	-	chr1	-	225838631	225838647
premiRNA	hsa-novelmir-583	chr1	226112985	226113067	+	chr1	+	225925285	225925367
miRNA	hsa-novelmiR-583-5p	chr1	226112985	226113007	+	chr1	+	225925285	225925307
miRNA	hsa-novelmiR-583-3p	chr1	226113043	226113067	+	chr1	+	225925343	225925367
premiRNA	hsa-novelmir-584	chr1	226123624	226123703	-	chr1	-	225935924	225936003
miRNA	hsa-novelmiR-584-5p	chr1	226123681	226123703	-	chr1	-	225935981	225936003
miRNA	hsa-novelmiR-584-3p	chr1	226123624	226123644	-	chr1	-	225935924	225935944
premiRNA	hsa-novelmir-585	chr1	226128360	226128434	+	chr1	+	225940660	225940734
miRNA	hsa-novelmiR-585-3p	chr1	226128415	226128434	+	chr1	+	225940715	225940734
miRNA	hsa-novelmiR-585-5p	chr1	226128360	226128378	+	chr1	+	225940660	225940678
premiRNA	hsa-novelmir-586	chr1	226132512	226132559	-	chr1	-	225944812	225944859
miRNA	hsa-novelmiR-586-3p	chr1	226132512	226132531	-	chr1	-	225944812	225944831
miRNA	hsa-novelmiR-586-5p	chr1	226132542	226132559	-	chr1	-	225944842	225944859
premiRNA	hsa-novelmir-587	chr1	226250376	226250440	+	chr1	+	226062675	226062739
miRNA	hsa-novelmiR-587-3p	chr1	226250422	226250440	+	chr1	+	226062721	226062739
miRNA	hsa-novelmiR-587-5p	chr1	226250376	226250393	+	chr1	+	226062675	226062692
premiRNA	hsa-novelmir-588	chr1	226264039	226264100	-	chr1	-	226076338	226076399
miRNA	hsa-novelmiR-588-3p	chr1	226264039	226264062	-	chr1	-	226076338	226076361
miRNA	hsa-novelmiR-588-5p	chr1	226264078	226264100	-	chr1	-	226076377	226076399
premiRNA	hsa-novelmir-589	chr1	226842190	226842228	-	chr1	-	226654489	226654527
miRNA	hsa-novelmiR-589-5p	chr1	226842211	226842228	-	chr1	-	226654510	226654527
miRNA	hsa-novelmiR-589-3p	chr1	226842190	226842208	-	chr1	-	226654489	226654507
premiRNA	hsa-novelmir-590	chr1	227506482	227506545	+	chr1	+	227318781	227318844
miRNA	hsa-novelmiR-590-3p	chr1	227506528	227506545	+	chr1	+	227318827	227318844
miRNA	hsa-novelmiR-590-5p	chr1	227506482	227506500	+	chr1	+	227318781	227318799
premiRNA	hsa-novelmir-591	chr1	227980732	227980773	+	chr1	+	227793031	227793072
miRNA	hsa-novelmiR-591-5p	chr1	227980732	227980749	+	chr1	+	227793031	227793048
miRNA	hsa-novelmiR-591-3p	chr1	227980760	227980773	+	chr1	+	227793059	227793072
premiRNA	hsa-novelmir-592	chr1	228280906	228280982	+	chr1	+	228093205	228093281
miRNA	hsa-novelmiR-592-3p	chr1	228280962	228280982	+	chr1	+	228093261	228093281
miRNA	hsa-novelmiR-592-5p	chr1	228280906	228280928	+	chr1	+	228093205	228093227
premiRNA	hsa-novelmir-593	chr1	228289870	228289950	-	chr1	-	228102169	228102249
miRNA	hsa-novelmiR-593-5p	chr1	228289929	228289950	-	chr1	-	228102228	228102249
miRNA	hsa-novelmiR-593-3p	chr1	228289870	228289892	-	chr1	-	228102169	228102191
premiRNA	hsa-novelmir-594	chr1	228341061	228341136	+	chr1	+	228153360	228153435
miRNA	hsa-novelmiR-594-3p	chr1	228341115	228341136	+	chr1	+	228153414	228153435
miRNA	hsa-novelmiR-594-5p	chr1	228341061	228341082	+	chr1	+	228153360	228153381
premiRNA	hsa-novelmir-595	chr1	228623503	228623560	+	chr1	+	228435802	228435859
miRNA	hsa-novelmiR-595-5p	chr1	228623503	228623524	+	chr1	+	228435802	228435823
miRNA	hsa-novelmiR-595-3p	chr1	228623539	228623560	+	chr1	+	228435838	228435859
premiRNA	hsa-novelmir-596	chr1	228644146	228644217	-	chr1	-	228456445	228456516
miRNA	hsa-novelmiR-596-3p	chr1	228644146	228644163	-	chr1	-	228456445	228456462
miRNA	hsa-novelmiR-596-5p	chr1	228644198	228644217	-	chr1	-	228456497	228456516
premiRNA	hsa-novelmir-597	chr1	228649785	228649841	-	chr1	-	228462084	228462140
miRNA	hsa-novelmiR-597-5p	chr1	228649821	228649841	-	chr1	-	228462120	228462140
miRNA	hsa-novelmiR-597-3p	chr1	228649785	228649806	-	chr1	-	228462084	228462105
premiRNA	hsa-novelmir-598	chr1	230387354	230387405	+	chr1	+	230251608	230251659
miRNA	hsa-novelmiR-598-5p	chr1	230387354	230387375	+	chr1	+	230251608	230251629
miRNA	hsa-novelmiR-598-3p	chr1	230387383	230387405	+	chr1	+	230251637	230251659
premiRNA	hsa-novelmir-599	chr1	230551338	230551398	-	chr1	-	230415592	230415652
miRNA	hsa-novelmiR-599-5p	chr1	230551374	230551398	-	chr1	-	230415628	230415652
miRNA	hsa-novelmiR-599-3p	chr1	230551338	230551359	-	chr1	-	230415592	230415613
premiRNA	hsa-novelmir-600	chr1	231400554	231400615	+	chr1	+	231264808	231264869
miRNA	hsa-novelmiR-600-3p	chr1	231400595	231400615	+	chr1	+	231264849	231264869
miRNA	hsa-novelmiR-600-5p	chr1	231400554	231400577	+	chr1	+	231264808	231264831
premiRNA	hsa-novelmir-601	chr1	231528652	231528710	-	chr1	-	231392906	231392964
miRNA	hsa-novelmiR-601-3p	chr1	231528652	231528671	-	chr1	-	231392906	231392925
miRNA	hsa-novelmiR-601-5p	chr1	231528690	231528710	-	chr1	-	231392944	231392964
premiRNA	hsa-novelmir-602	chr1	231839591	231839653	+	chr1	+	231703845	231703907
miRNA	hsa-novelmiR-602-3p	chr1	231839632	231839653	+	chr1	+	231703886	231703907
miRNA	hsa-novelmiR-602-5p	chr1	231839591	231839616	+	chr1	+	231703845	231703870
premiRNA	hsa-novelmir-603	chr1	232423543	232423601	+	chr1	+	232287797	232287855
miRNA	hsa-novelmiR-603-3p	chr1	232423580	232423601	+	chr1	+	232287834	232287855
miRNA	hsa-novelmiR-603-5p	chr1	232423543	232423564	+	chr1	+	232287797	232287818
premiRNA	hsa-novelmir-604	chr1	232689356	232689408	-	chr1	-	232553610	232553662
miRNA	hsa-novelmiR-604-3p	chr1	232689356	232689378	-	chr1	-	232553610	232553632
miRNA	hsa-novelmiR-604-5p	chr1	232689387	232689408	-	chr1	-	232553641	232553662
premiRNA	hsa-novelmir-605	chr1	233154049	233154109	-	chr1	-	233018303	233018363
miRNA	hsa-novelmiR-605-3p	chr1	233154049	233154071	-	chr1	-	233018303	233018325
miRNA	hsa-novelmiR-605-5p	chr1	233154083	233154109	-	chr1	-	233018337	233018363
premiRNA	hsa-novelmir-606	chr1	234442220	234442276	-	chr1	-	234306474	234306530
miRNA	hsa-novelmiR-606-3p	chr1	234442220	234442241	-	chr1	-	234306474	234306495
miRNA	hsa-novelmiR-606-5p	chr1	234442255	234442276	-	chr1	-	234306509	234306530
premiRNA	hsa-novelmir-607	chr1	234604788	234604854	-	chr1	-	234469042	234469108
miRNA	hsa-novelmiR-607-3p	chr1	234604788	234604808	-	chr1	-	234469042	234469062
miRNA	hsa-novelmiR-607-5p	chr1	234604834	234604854	-	chr1	-	234469088	234469108
premiRNA	hsa-novelmir-608	chr1	234604790	234604856	+	chr1	+	234469044	234469110
miRNA	hsa-novelmiR-608-3p	chr1	234604836	234604856	+	chr1	+	234469090	234469110
miRNA	hsa-novelmiR-608-5p	chr1	234604790	234604810	+	chr1	+	234469044	234469064
premiRNA	hsa-novelmir-609	chr1	234644182	234644254	+	chr1	+	234508436	234508508
miRNA	hsa-novelmiR-609-3p	chr1	234644234	234644254	+	chr1	+	234508488	234508508
miRNA	hsa-novelmiR-609-5p	chr1	234644182	234644203	+	chr1	+	234508436	234508457
premiRNA	hsa-novelmir-610	chr1	235301192	235301255	-	chr1	-	235137877	235137940
miRNA	hsa-novelmiR-610-5p	chr1	235301234	235301255	-	chr1	-	235137919	235137940
miRNA	hsa-novelmiR-610-3p	chr1	235301192	235301209	-	chr1	-	235137877	235137894
premiRNA	hsa-novelmir-611	chr1	235310210	235310287	-	chr1	-	235146895	235146972
miRNA	hsa-novelmiR-611-5p	chr1	235310264	235310287	-	chr1	-	235146949	235146972
miRNA	hsa-novelmiR-611-3p	chr1	235310210	235310233	-	chr1	-	235146895	235146918
premiRNA	hsa-novelmir-612	chr1	235481852	235481912	-	chr1	-	235318537	235318597
miRNA	hsa-novelmiR-612-5p	chr1	235481891	235481912	-	chr1	-	235318576	235318597
miRNA	hsa-novelmiR-612-3p	chr1	235481852	235481874	-	chr1	-	235318537	235318559
premiRNA	hsa-novelmir-613	chr1	236070052	236070110	+	chr1	+	235906752	235906810
miRNA	hsa-novelmiR-613-3p	chr1	236070089	236070110	+	chr1	+	235906789	235906810
miRNA	hsa-novelmiR-613-5p	chr1	236070052	236070074	+	chr1	+	235906752	235906774
premiRNA	hsa-novelmir-614	chr1	236157070	236157115	-	chr1	-	235993770	235993815
miRNA	hsa-novelmiR-614-3p	chr1	236157070	236157094	-	chr1	-	235993770	235993794
miRNA	hsa-novelmiR-614-5p	chr1	236157098	236157115	-	chr1	-	235993798	235993815
premiRNA	hsa-novelmir-615	chr1	236653674	236653757	+	chr1	+	236490374	236490457
miRNA	hsa-novelmiR-615-5p	chr1	236653674	236653693	+	chr1	+	236490374	236490393
miRNA	hsa-novelmiR-615-3p	chr1	236653742	236653757	+	chr1	+	236490442	236490457
premiRNA	hsa-novelmir-616	chr1	236699778	236699836	-	chr1	-	236536478	236536536
miRNA	hsa-novelmiR-616-5p	chr1	236699813	236699836	-	chr1	-	236536513	236536536
miRNA	hsa-novelmiR-616-3p	chr1	236699778	236699800	-	chr1	-	236536478	236536500
premiRNA	hsa-novelmir-617	chr1	236716884	236716952	-	chr1	-	236553584	236553652
miRNA	hsa-novelmiR-617-5p	chr1	236716929	236716952	-	chr1	-	236553629	236553652
miRNA	hsa-novelmiR-617-3p	chr1	236716884	236716908	-	chr1	-	236553584	236553608
premiRNA	hsa-novelmir-618	chr1	240714429	240714484	+	chr1	+	240551129	240551184
miRNA	hsa-novelmiR-618-5p	chr1	240714429	240714450	+	chr1	+	240551129	240551150
miRNA	hsa-novelmiR-618-3p	chr1	240714463	240714484	+	chr1	+	240551163	240551184
premiRNA	hsa-novelmir-619	chr1	241811217	241811282	+	chr1	+	241647915	241647980
miRNA	hsa-novelmiR-619-5p	chr1	241811217	241811238	+	chr1	+	241647915	241647936
miRNA	hsa-novelmiR-619-3p	chr1	241811259	241811282	+	chr1	+	241647957	241647980
premiRNA	hsa-novelmir-620	chr1	242473895	242473954	-	chr1	-	242310593	242310652
miRNA	hsa-novelmiR-620-5p	chr1	242473933	242473954	-	chr1	-	242310631	242310652
miRNA	hsa-novelmiR-620-3p	chr1	242473895	242473916	-	chr1	-	242310593	242310614
premiRNA	hsa-novelmir-621	chr1	242629137	242629224	-	chr1	-	242465835	242465922
miRNA	hsa-novelmiR-621-5p	chr1	242629203	242629224	-	chr1	-	242465901	242465922
miRNA	hsa-novelmiR-621-3p	chr1	242629137	242629159	-	chr1	-	242465835	242465857
premiRNA	hsa-novelmir-622	chr1	243650872	243650936	-	chr1	-	243487570	243487634
miRNA	hsa-novelmiR-622-5p	chr1	243650916	243650936	-	chr1	-	243487614	243487634
miRNA	hsa-novelmiR-622-3p	chr1	243650872	243650892	-	chr1	-	243487570	243487590
premiRNA	hsa-novelmir-623	chr1	244536992	244537054	-	chr1	-	244373690	244373752
miRNA	hsa-novelmiR-623-5p	chr1	244537034	244537054	-	chr1	-	244373732	244373752
miRNA	hsa-novelmiR-623-3p	chr1	244536992	244537013	-	chr1	-	244373690	244373711
premiRNA	hsa-novelmir-624	chr1	244624726	244624769	-	chr1	-	244461424	244461467
miRNA	hsa-novelmiR-624-3p	chr1	244624726	244624745	-	chr1	-	244461424	244461443
miRNA	hsa-novelmiR-624-5p	chr1	244624747	244624769	-	chr1	-	244461445	244461467
premiRNA	hsa-novelmir-625	chr1	245533650	245533707	+	chr1	+	245370348	245370405
miRNA	hsa-novelmiR-625-5p	chr1	245533650	245533671	+	chr1	+	245370348	245370369
miRNA	hsa-novelmiR-625-3p	chr1	245533686	245533707	+	chr1	+	245370384	245370405
premiRNA	hsa-novelmir-626	chr1	246333111	246333199	-	chr1	-	246169809	246169897
miRNA	hsa-novelmiR-626-5p	chr1	246333178	246333199	-	chr1	-	246169876	246169897
miRNA	hsa-novelmiR-626-3p	chr1	246333111	246333131	-	chr1	-	246169809	246169829
premiRNA	hsa-novelmir-627	chr1	246451688	246451746	-	chr1	-	246288386	246288444
miRNA	hsa-novelmiR-627-5p	chr1	246451725	246451746	-	chr1	-	246288423	246288444
miRNA	hsa-novelmiR-627-3p	chr1	246451688	246451705	-	chr1	-	246288386	246288403
premiRNA	hsa-novelmir-628	chr1	246700245	246700331	-	chr1	-	246536943	246537029
miRNA	hsa-novelmiR-628-5p	chr1	246700310	246700331	-	chr1	-	246537008	246537029
miRNA	hsa-novelmiR-628-3p	chr1	246700245	246700267	-	chr1	-	246536943	246536965
premiRNA	hsa-novelmir-629	chr1	247179194	247179253	-	chr1	-	247015892	247015951
miRNA	hsa-novelmiR-629-3p	chr1	247179194	247179218	-	chr1	-	247015892	247015916
miRNA	hsa-novelmiR-629-5p	chr1	247179232	247179253	-	chr1	-	247015930	247015951
premiRNA	hsa-novelmir-630	chr1	247357761	247357816	-	chr1	-	247194459	247194514
miRNA	hsa-novelmiR-630-3p	chr1	247357761	247357782	-	chr1	-	247194459	247194480
miRNA	hsa-novelmiR-630-5p	chr1	247357793	247357816	-	chr1	-	247194491	247194514
premiRNA	hsa-novelmir-631	chr1	247456492	247456567	-	chr1	-	247293190	247293265
miRNA	hsa-novelmiR-631-3p	chr1	247456492	247456509	-	chr1	-	247293190	247293207
miRNA	hsa-novelmiR-631-5p	chr1	247456551	247456567	-	chr1	-	247293249	247293265
premiRNA	hsa-novelmir-632	chr1	247459563	247459638	-	chr1	-	247296261	247296336
miRNA	hsa-novelmiR-632-5p	chr1	247459621	247459638	-	chr1	-	247296319	247296336
miRNA	hsa-novelmiR-632-3p	chr1	247459563	247459584	-	chr1	-	247296261	247296282
premiRNA	hsa-novelmir-633	chr2	3301096	3301152	-	chr2	-	3297325	3297381
miRNA	hsa-novelmiR-633-3p	chr2	3301096	3301116	-	chr2	-	3297325	3297345
miRNA	hsa-novelmiR-633-5p	chr2	3301134	3301152	-	chr2	-	3297363	3297381
premiRNA	hsa-novelmir-634	chr2	3307802	3307863	-	chr2	-	3304031	3304092
miRNA	hsa-novelmiR-634-5p	chr2	3307841	3307863	-	chr2	-	3304070	3304092
miRNA	hsa-novelmiR-634-3p	chr2	3307802	3307823	-	chr2	-	3304031	3304052
premiRNA	hsa-novelmir-635	chr2	3343260	3343320	-	chr2	-	3339489	3339549
miRNA	hsa-novelmiR-635-3p	chr2	3343260	3343282	-	chr2	-	3339489	3339511
miRNA	hsa-novelmiR-635-5p	chr2	3343299	3343320	-	chr2	-	3339528	3339549
premiRNA	hsa-novelmir-636	chr2	3624289	3624343	+	chr2	+	3576699	3576753
miRNA	hsa-novelmiR-636-5p	chr2	3624289	3624313	+	chr2	+	3576699	3576723
miRNA	hsa-novelmiR-636-3p	chr2	3624319	3624343	+	chr2	+	3576729	3576753
premiRNA	hsa-novelmir-637	chr2	6995234	6995291	-	chr2	-	6855103	6855160
miRNA	hsa-novelmiR-637-3p	chr2	6995234	6995254	-	chr2	-	6855103	6855123
miRNA	hsa-novelmiR-637-5p	chr2	6995271	6995291	-	chr2	-	6855140	6855160
premiRNA	hsa-novelmir-638	chr2	7516438	7516490	+	chr2	+	7376307	7376359
miRNA	hsa-novelmiR-638-5p	chr2	7516438	7516462	+	chr2	+	7376307	7376331
miRNA	hsa-novelmiR-638-3p	chr2	7516465	7516490	+	chr2	+	7376334	7376359
premiRNA	hsa-novelmir-639	chr2	7944487	7944556	+	chr2	+	7804356	7804425
miRNA	hsa-novelmiR-639-3p	chr2	7944535	7944556	+	chr2	+	7804404	7804425
miRNA	hsa-novelmiR-639-5p	chr2	7944487	7944511	+	chr2	+	7804356	7804380
premiRNA	hsa-novelmir-640	chr2	8534393	8534450	-	chr2	-	8394263	8394320
miRNA	hsa-novelmiR-640-3p	chr2	8534393	8534413	-	chr2	-	8394263	8394283
miRNA	hsa-novelmiR-640-5p	chr2	8534426	8534450	-	chr2	-	8394296	8394320
premiRNA	hsa-novelmir-641	chr2	9146603	9146670	+	chr2	+	9006474	9006541
miRNA	hsa-novelmiR-641-3p	chr2	9146649	9146670	+	chr2	+	9006520	9006541
miRNA	hsa-novelmiR-641-5p	chr2	9146603	9146624	+	chr2	+	9006474	9006495
premiRNA	hsa-novelmir-642	chr2	10263100	10263157	-	chr2	-	10122973	10123030
miRNA	hsa-novelmiR-642-5p	chr2	10263139	10263157	-	chr2	-	10123012	10123030
miRNA	hsa-novelmiR-642-3p	chr2	10263100	10263116	-	chr2	-	10122973	10122989
premiRNA	hsa-novelmir-643	chr2	10276536	10276586	+	chr2	+	10136409	10136459
miRNA	hsa-novelmiR-643-5p	chr2	10276536	10276555	+	chr2	+	10136409	10136428
miRNA	hsa-novelmiR-643-3p	chr2	10276569	10276586	+	chr2	+	10136442	10136459
premiRNA	hsa-novelmir-644	chr2	10425194	10425256	-	chr2	-	10285068	10285130
miRNA	hsa-novelmiR-644-3p	chr2	10425194	10425216	-	chr2	-	10285068	10285090
miRNA	hsa-novelmiR-644-5p	chr2	10425235	10425256	-	chr2	-	10285109	10285130
premiRNA	hsa-novelmir-645	chr2	10450253	10450309	+	chr2	+	10310127	10310183
miRNA	hsa-novelmiR-645-3p	chr2	10450289	10450309	+	chr2	+	10310163	10310183
miRNA	hsa-novelmiR-645-5p	chr2	10450253	10450276	+	chr2	+	10310127	10310150
premiRNA	hsa-novelmir-646	chr2	10918540	10918584	-	chr2	-	10778414	10778458
miRNA	hsa-novelmiR-646-5p	chr2	10918563	10918584	-	chr2	-	10778437	10778458
miRNA	hsa-novelmiR-646-3p	chr2	10918540	10918559	-	chr2	-	10778414	10778433
premiRNA	hsa-novelmir-647	chr2	10933564	10933648	-	chr2	-	10793438	10793522
miRNA	hsa-novelmiR-647-5p	chr2	10933625	10933648	-	chr2	-	10793499	10793522
miRNA	hsa-novelmiR-647-3p	chr2	10933564	10933590	-	chr2	-	10793438	10793464
premiRNA	hsa-novelmir-648	chr2	10951254	10951314	-	chr2	-	10811128	10811188
miRNA	hsa-novelmiR-648-5p	chr2	10951296	10951314	-	chr2	-	10811170	10811188
miRNA	hsa-novelmiR-648-3p	chr2	10951254	10951271	-	chr2	-	10811128	10811145
premiRNA	hsa-novelmir-649	chr2	10995718	10995777	+	chr2	+	10855592	10855651
miRNA	hsa-novelmiR-649-3p	chr2	10995756	10995777	+	chr2	+	10855630	10855651
miRNA	hsa-novelmiR-649-5p	chr2	10995718	10995739	+	chr2	+	10855592	10855613
premiRNA	hsa-novelmir-650	chr2	11622087	11622146	-	chr2	-	11481961	11482020
miRNA	hsa-novelmiR-650-3p	chr2	11622087	11622108	-	chr2	-	11481961	11481982
miRNA	hsa-novelmiR-650-5p	chr2	11622125	11622146	-	chr2	-	11481999	11482020
premiRNA	hsa-novelmir-651	chr2	11636128	11636184	+	chr2	+	11496002	11496058
miRNA	hsa-novelmiR-651-3p	chr2	11636164	11636184	+	chr2	+	11496038	11496058
miRNA	hsa-novelmiR-651-5p	chr2	11636128	11636149	+	chr2	+	11496002	11496023
premiRNA	hsa-novelmir-652	chr2	11758567	11758617	+	chr2	+	11618441	11618491
miRNA	hsa-novelmiR-652-3p	chr2	11758595	11758617	+	chr2	+	11618469	11618491
miRNA	hsa-novelmiR-652-5p	chr2	11758567	11758587	+	chr2	+	11618441	11618461
premiRNA	hsa-novelmir-653	chr2	11905334	11905409	+	chr2	+	11765208	11765283
miRNA	hsa-novelmiR-653-5p	chr2	11905334	11905353	+	chr2	+	11765208	11765227
miRNA	hsa-novelmiR-653-3p	chr2	11905391	11905409	+	chr2	+	11765265	11765283
premiRNA	hsa-novelmir-654	chr2	11918510	11918546	+	chr2	+	11778384	11778420
miRNA	hsa-novelmiR-654-5p	chr2	11918510	11918527	+	chr2	+	11778384	11778401
miRNA	hsa-novelmiR-654-3p	chr2	11918529	11918546	+	chr2	+	11778403	11778420
premiRNA	hsa-novelmir-655	chr2	11970442	11970479	-	chr2	-	11830316	11830353
miRNA	hsa-novelmiR-655-3p	chr2	11970442	11970460	-	chr2	-	11830316	11830334
miRNA	hsa-novelmiR-655-5p	chr2	11970462	11970479	-	chr2	-	11830336	11830353
premiRNA	hsa-novelmir-656	chr2	12857419	12857491	+	chr2	+	12717293	12717365
miRNA	hsa-novelmiR-656-3p	chr2	12857469	12857491	+	chr2	+	12717343	12717365
miRNA	hsa-novelmiR-656-5p	chr2	12857419	12857437	+	chr2	+	12717293	12717311
premiRNA	hsa-novelmir-657	chr2	15303690	15303748	+	chr2	+	15163566	15163624
miRNA	hsa-novelmiR-657-5p	chr2	15303690	15303713	+	chr2	+	15163566	15163589
miRNA	hsa-novelmiR-657-3p	chr2	15303726	15303748	+	chr2	+	15163602	15163624
premiRNA	hsa-novelmir-658	chr2	15643427	15643509	-	chr2	-	15503303	15503385
miRNA	hsa-novelmiR-658-5p	chr2	15643488	15643509	-	chr2	-	15503364	15503385
miRNA	hsa-novelmiR-658-3p	chr2	15643427	15643448	-	chr2	-	15503303	15503324
premiRNA	hsa-novelmir-659	chr2	15732143	15732219	+	chr2	+	15592019	15592095
miRNA	hsa-novelmiR-659-3p	chr2	15732195	15732219	+	chr2	+	15592071	15592095
miRNA	hsa-novelmiR-659-5p	chr2	15732143	15732168	+	chr2	+	15592019	15592044
premiRNA	hsa-novelmir-660	chr2	15732842	15732909	+	chr2	+	15592718	15592785
miRNA	hsa-novelmiR-660-3p	chr2	15732888	15732909	+	chr2	+	15592764	15592785
miRNA	hsa-novelmiR-660-5p	chr2	15732842	15732863	+	chr2	+	15592718	15592739
premiRNA	hsa-novelmir-661	chr2	16079010	16079093	-	chr2	-	15938888	15938971
miRNA	hsa-novelmiR-661-3p	chr2	16079010	16079028	-	chr2	-	15938888	15938906
miRNA	hsa-novelmiR-661-5p	chr2	16079074	16079093	-	chr2	-	15938952	15938971
premiRNA	hsa-novelmir-662	chr2	16612739	16612800	-	chr2	-	16431471	16431532
miRNA	hsa-novelmiR-662-5p	chr2	16612779	16612800	-	chr2	-	16431511	16431532
miRNA	hsa-novelmiR-662-3p	chr2	16612739	16612760	-	chr2	-	16431471	16431492
premiRNA	hsa-novelmir-663	chr2	17934538	17934597	-	chr2	-	17753271	17753330
miRNA	hsa-novelmiR-663-5p	chr2	17934575	17934597	-	chr2	-	17753308	17753330
miRNA	hsa-novelmiR-663-3p	chr2	17934538	17934558	-	chr2	-	17753271	17753291
premiRNA	hsa-novelmir-664	chr2	17967071	17967151	+	chr2	+	17785804	17785884
miRNA	hsa-novelmiR-664-3p	chr2	17967132	17967151	+	chr2	+	17785865	17785884
miRNA	hsa-novelmiR-664-5p	chr2	17967071	17967092	+	chr2	+	17785804	17785825
premiRNA	hsa-novelmir-665	chr2	18786627	18786686	+	chr2	+	18605361	18605420
miRNA	hsa-novelmiR-665-3p	chr2	18786664	18786686	+	chr2	+	18605398	18605420
miRNA	hsa-novelmiR-665-5p	chr2	18786627	18786648	+	chr2	+	18605361	18605382
premiRNA	hsa-novelmir-666	chr2	19672441	19672505	-	chr2	-	19472680	19472744
miRNA	hsa-novelmiR-666-5p	chr2	19672481	19672505	-	chr2	-	19472720	19472744
miRNA	hsa-novelmiR-666-3p	chr2	19672441	19672462	-	chr2	-	19472680	19472701
[truncated: 17,631 more rows]

## Sheet: TableS10b
Candidate novel miRNAs in mouse
Type	Name	Chromosome (mm9)	Start (mm9)	End (mm9)	Strand (mm9)	Chromosome (mm10)	Start (mm10)	End (mm10)	Strand (mm10)
premiRNA	mmu-novelmir-1	chr1	12312063	12312149	-	chr1	-	12321982	12322068
miRNA	mmu-novelmiR-1-5p	chr1	12312131	12312149	-	chr1	-	12322050	12322068
miRNA	mmu-novelmiR-1-3p	chr1	12312063	12312083	-	chr1	-	12321982	12322002
premiRNA	mmu-novelmir-2	chr1	16641567	16641630	-	chr1	-	16651486	16651549
miRNA	mmu-novelmiR-2-5p	chr1	16641608	16641630	-	chr1	-	16651527	16651549
miRNA	mmu-novelmiR-2-3p	chr1	16641567	16641585	-	chr1	-	16651486	16651504
premiRNA	mmu-novelmir-3	chr1	20793586	20793647	-	chr1	-	20803505	20803566
miRNA	mmu-novelmiR-3-5p	chr1	20793628	20793647	-	chr1	-	20803547	20803566
miRNA	mmu-novelmiR-3-3p	chr1	20793586	20793604	-	chr1	-	20803505	20803523
premiRNA	mmu-novelmir-4	chr1	33997980	33998044	+	chr1	+	33941135	33941199
miRNA	mmu-novelmiR-4-5p	chr1	33997980	33998004	+	chr1	+	33941135	33941159
miRNA	mmu-novelmiR-4-3p	chr1	33998021	33998044	+	chr1	+	33941176	33941199
premiRNA	mmu-novelmir-5	chr1	34194266	34194343	+	chr1	+	34137421	34137498
miRNA	mmu-novelmiR-5-3p	chr1	34194324	34194343	+	chr1	+	34137479	34137498
miRNA	mmu-novelmiR-5-5p	chr1	34194266	34194288	+	chr1	+	34137421	34137443
premiRNA	mmu-novelmir-6	chr1	36058589	36058645	-	chr1	-	36001744	36001800
miRNA	mmu-novelmiR-6-3p	chr1	36058589	36058610	-	chr1	-	36001744	36001765
miRNA	mmu-novelmiR-6-5p	chr1	36058622	36058645	-	chr1	-	36001777	36001800
premiRNA	mmu-novelmir-7	chr1	38142439	38142495	-	chr1	-	38085594	38085650
miRNA	mmu-novelmiR-7-5p	chr1	38142472	38142495	-	chr1	-	38085627	38085650
miRNA	mmu-novelmiR-7-3p	chr1	38142439	38142456	-	chr1	-	38085594	38085611
premiRNA	mmu-novelmir-8	chr1	38262316	38262374	-	chr1	-	38205471	38205529
miRNA	mmu-novelmiR-8-5p	chr1	38262353	38262374	-	chr1	-	38205508	38205529
miRNA	mmu-novelmiR-8-3p	chr1	38262316	38262337	-	chr1	-	38205471	38205492
premiRNA	mmu-novelmir-9	chr1	38861499	38861558	+	chr1	+	38804654	38804713
miRNA	mmu-novelmiR-9-5p	chr1	38861499	38861519	+	chr1	+	38804654	38804674
miRNA	mmu-novelmiR-9-3p	chr1	38861538	38861558	+	chr1	+	38804693	38804713
premiRNA	mmu-novelmir-10	chr1	39460932	39460985	-	chr1	-	39404087	39404140
miRNA	mmu-novelmiR-10-5p	chr1	39460965	39460985	-	chr1	-	39404120	39404140
miRNA	mmu-novelmiR-10-3p	chr1	39460932	39460952	-	chr1	-	39404087	39404107
premiRNA	mmu-novelmir-11	chr1	39607658	39607726	-	chr1	-	39550813	39550881
miRNA	mmu-novelmiR-11-3p	chr1	39607658	39607678	-	chr1	-	39550813	39550833
miRNA	mmu-novelmiR-11-5p	chr1	39607705	39607726	-	chr1	-	39550860	39550881
premiRNA	mmu-novelmir-12	chr1	39963850	39963921	+	chr1	+	39907005	39907076
miRNA	mmu-novelmiR-12-3p	chr1	39963901	39963921	+	chr1	+	39907056	39907076
miRNA	mmu-novelmiR-12-5p	chr1	39963850	39963873	+	chr1	+	39907005	39907028
premiRNA	mmu-novelmir-13	chr1	45368559	45368612	+	chr1	+	45311714	45311767
miRNA	mmu-novelmiR-13-3p	chr1	45368589	45368612	+	chr1	+	45311744	45311767
miRNA	mmu-novelmiR-13-5p	chr1	45368559	45368581	+	chr1	+	45311714	45311736
premiRNA	mmu-novelmir-14	chr1	55045311	55045375	-	chr1	-	54988467	54988531
miRNA	mmu-novelmiR-14-3p	chr1	55045311	55045334	-	chr1	-	54988467	54988490
miRNA	mmu-novelmiR-14-5p	chr1	55045354	55045375	-	chr1	-	54988510	54988531
premiRNA	mmu-novelmir-15	chr1	59265610	59265668	-	chr1	-	59208766	59208824
miRNA	mmu-novelmiR-15-5p	chr1	59265646	59265668	-	chr1	-	59208802	59208824
miRNA	mmu-novelmiR-15-3p	chr1	59265610	59265635	-	chr1	-	59208766	59208791
premiRNA	mmu-novelmir-16	chr1	60559192	60559256	-	chr1	-	60502348	60502412
miRNA	mmu-novelmiR-16-5p	chr1	60559234	60559256	-	chr1	-	60502390	60502412
miRNA	mmu-novelmiR-16-3p	chr1	60559192	60559211	-	chr1	-	60502348	60502367
premiRNA	mmu-novelmir-17	chr1	65206298	65206356	-	chr1	-	65159724	65159782
miRNA	mmu-novelmiR-17-5p	chr1	65206335	65206356	-	chr1	-	65159761	65159782
miRNA	mmu-novelmiR-17-3p	chr1	65206298	65206320	-	chr1	-	65159724	65159746
premiRNA	mmu-novelmir-18	chr1	66347961	66348036	+	chr1	+	66301387	66301462
miRNA	mmu-novelmiR-18-5p	chr1	66347961	66347983	+	chr1	+	66301387	66301409
miRNA	mmu-novelmiR-18-3p	chr1	66348014	66348036	+	chr1	+	66301440	66301462
premiRNA	mmu-novelmir-19	chr1	72290477	72290555	+	chr1	+	72243903	72243981
miRNA	mmu-novelmiR-19-5p	chr1	72290477	72290498	+	chr1	+	72243903	72243924
miRNA	mmu-novelmiR-19-3p	chr1	72290534	72290555	+	chr1	+	72243960	72243981
premiRNA	mmu-novelmir-20	chr1	74483063	74483125	-	chr1	-	74436489	74436551
miRNA	mmu-novelmiR-20-5p	chr1	74483104	74483125	-	chr1	-	74436530	74436551
miRNA	mmu-novelmiR-20-3p	chr1	74483063	74483084	-	chr1	-	74436489	74436510
premiRNA	mmu-novelmir-21	chr1	75183460	75183528	-	chr1	-	75186886	75186954
miRNA	mmu-novelmiR-21-3p	chr1	75183460	75183483	-	chr1	-	75186886	75186909
miRNA	mmu-novelmiR-21-5p	chr1	75183509	75183528	-	chr1	-	75186935	75186954
premiRNA	mmu-novelmir-22	chr1	77458387	77458461	-	chr1	-	77461812	77461886
miRNA	mmu-novelmiR-22-5p	chr1	77458440	77458461	-	chr1	-	77461865	77461886
miRNA	mmu-novelmiR-22-3p	chr1	77458387	77458405	-	chr1	-	77461812	77461830
premiRNA	mmu-novelmir-23	chr1	79737340	79737404	-	chr1	-	79740765	79740829
miRNA	mmu-novelmiR-23-3p	chr1	79737340	79737361	-	chr1	-	79740765	79740786
miRNA	mmu-novelmiR-23-5p	chr1	79737383	79737404	-	chr1	-	79740808	79740829
premiRNA	mmu-novelmir-24	chr1	80658779	80658848	+	chr1	+	80662204	80662273
miRNA	mmu-novelmiR-24-5p	chr1	80658779	80658800	+	chr1	+	80662204	80662225
miRNA	mmu-novelmiR-24-3p	chr1	80658827	80658848	+	chr1	+	80662252	80662273
premiRNA	mmu-novelmir-25	chr1	88424078	88424135	-	chr1	-	86527503	86527560
miRNA	mmu-novelmiR-25-3p	chr1	88424078	88424098	-	chr1	-	86527503	86527523
miRNA	mmu-novelmiR-25-5p	chr1	88424113	88424135	-	chr1	-	86527538	86527560
premiRNA	mmu-novelmir-26	chr1	89688557	89688623	+	chr1	+	87791982	87792048
miRNA	mmu-novelmiR-26-5p	chr1	89688557	89688580	+	chr1	+	87791982	87792005
miRNA	mmu-novelmiR-26-3p	chr1	89688602	89688623	+	chr1	+	87792027	87792048
premiRNA	mmu-novelmir-27	chr1	90597857	90597901	-	chr1	-	88701282	88701326
miRNA	mmu-novelmiR-27-5p	chr1	90597881	90597901	-	chr1	-	88701306	88701326
miRNA	mmu-novelmiR-27-3p	chr1	90597857	90597877	-	chr1	-	88701282	88701302
premiRNA	mmu-novelmir-28	chr1	95716503	95716552	+	chr1	+	93819926	93819975
miRNA	mmu-novelmiR-28-3p	chr1	95716531	95716552	+	chr1	+	93819954	93819975
miRNA	mmu-novelmiR-28-5p	chr1	95716503	95716527	+	chr1	+	93819926	93819950
premiRNA	mmu-novelmir-29	chr1	119382513	119382574	+	chr1	+	117485936	117485997
miRNA	mmu-novelmiR-29-3p	chr1	119382556	119382574	+	chr1	+	117485979	117485997
miRNA	mmu-novelmiR-29-5p	chr1	119382513	119382532	+	chr1	+	117485936	117485955
premiRNA	mmu-novelmir-30	chr1	120421638	120421694	+	chr1	+	118525061	118525117
miRNA	mmu-novelmiR-30-3p	chr1	120421674	120421694	+	chr1	+	118525097	118525117
miRNA	mmu-novelmiR-30-5p	chr1	120421638	120421659	+	chr1	+	118525061	118525082
premiRNA	mmu-novelmir-31	chr1	121395284	121395340	-	chr1	-	119498707	119498763
miRNA	mmu-novelmiR-31-3p	chr1	121395284	121395305	-	chr1	-	119498707	119498728
miRNA	mmu-novelmiR-31-5p	chr1	121395318	121395340	-	chr1	-	119498741	119498763
premiRNA	mmu-novelmir-32	chr1	122016789	122016832	-	chr1	-	120120212	120120255
miRNA	mmu-novelmiR-32-5p	chr1	122016811	122016832	-	chr1	-	120120234	120120255
miRNA	mmu-novelmiR-32-3p	chr1	122016789	122016806	-	chr1	-	120120212	120120229
premiRNA	mmu-novelmir-33	chr1	128670385	128670454	+	chr1	+	126773808	126773877
miRNA	mmu-novelmiR-33-3p	chr1	128670433	128670454	+	chr1	+	126773856	126773877
miRNA	mmu-novelmiR-33-5p	chr1	128670385	128670407	+	chr1	+	126773808	126773830
premiRNA	mmu-novelmir-34	chr1	129699050	129699134	+	chr1	+	127802473	127802557
miRNA	mmu-novelmiR-34-3p	chr1	129699114	129699134	+	chr1	+	127802537	127802557
miRNA	mmu-novelmiR-34-5p	chr1	129699050	129699072	+	chr1	+	127802473	127802495
premiRNA	mmu-novelmir-35	chr1	133906106	133906176	+	chr1	+	132009529	132009599
miRNA	mmu-novelmiR-35-3p	chr1	133906154	133906176	+	chr1	+	132009577	132009599
miRNA	mmu-novelmiR-35-5p	chr1	133906106	133906128	+	chr1	+	132009529	132009551
premiRNA	mmu-novelmir-36	chr1	133922264	133922327	+	chr1	+	132025687	132025750
miRNA	mmu-novelmiR-36-5p	chr1	133922264	133922283	+	chr1	+	132025687	132025706
miRNA	mmu-novelmiR-36-3p	chr1	133922305	133922327	+	chr1	+	132025728	132025750
premiRNA	mmu-novelmir-37	chr1	134098898	134098968	+	chr1	+	132202321	132202391
miRNA	mmu-novelmiR-37-3p	chr1	134098944	134098968	+	chr1	+	132202367	132202391
miRNA	mmu-novelmiR-37-5p	chr1	134098898	134098920	+	chr1	+	132202321	132202343
premiRNA	mmu-novelmir-38	chr1	134411695	134411760	-	chr1	-	132515118	132515183
miRNA	mmu-novelmiR-38-5p	chr1	134411739	134411760	-	chr1	-	132515162	132515183
miRNA	mmu-novelmiR-38-3p	chr1	134411695	134411721	-	chr1	-	132515118	132515144
premiRNA	mmu-novelmir-39	chr1	134885930	134885988	-	chr1	-	132989353	132989411
miRNA	mmu-novelmiR-39-5p	chr1	134885964	134885988	-	chr1	-	132989387	132989411
miRNA	mmu-novelmiR-39-3p	chr1	134885930	134885952	-	chr1	-	132989353	132989375
premiRNA	mmu-novelmir-40	chr1	134922204	134922280	+	chr1	+	133025627	133025703
miRNA	mmu-novelmiR-40-3p	chr1	134922257	134922280	+	chr1	+	133025680	133025703
miRNA	mmu-novelmiR-40-5p	chr1	134922204	134922227	+	chr1	+	133025627	133025650
premiRNA	mmu-novelmir-41	chr1	136384197	136384245	+	chr1	+	134487620	134487668
miRNA	mmu-novelmiR-41-3p	chr1	136384222	136384245	+	chr1	+	134487645	134487668
miRNA	mmu-novelmiR-41-5p	chr1	136384197	136384219	+	chr1	+	134487620	134487642
premiRNA	mmu-novelmir-42	chr1	142474413	142474483	+	chr1	+	140577836	140577906
miRNA	mmu-novelmiR-42-5p	chr1	142474413	142474434	+	chr1	+	140577836	140577857
miRNA	mmu-novelmiR-42-3p	chr1	142474461	142474483	+	chr1	+	140577884	140577906
premiRNA	mmu-novelmir-43	chr1	145624131	145624187	-	chr1	-	143777001	143777057
miRNA	mmu-novelmiR-43-3p	chr1	145624131	145624154	-	chr1	-	143777001	143777024
miRNA	mmu-novelmiR-43-5p	chr1	145624166	145624187	-	chr1	-	143777036	143777057
premiRNA	mmu-novelmir-44	chr1	154750176	154750224	-	chr1	-	152903046	152903094
miRNA	mmu-novelmiR-44-3p	chr1	154750176	154750200	-	chr1	-	152903046	152903070
miRNA	mmu-novelmiR-44-5p	chr1	154750201	154750224	-	chr1	-	152903071	152903094
premiRNA	mmu-novelmir-45	chr1	154987066	154987108	-	chr1	-	153139936	153139978
miRNA	mmu-novelmiR-45-5p	chr1	154987090	154987108	-	chr1	-	153139960	153139978
miRNA	mmu-novelmiR-45-3p	chr1	154987066	154987084	-	chr1	-	153139936	153139954
premiRNA	mmu-novelmir-46	chr1	157899129	157899208	+	chr1	+	156051999	156052078
miRNA	mmu-novelmiR-46-5p	chr1	157899129	157899153	+	chr1	+	156051999	156052023
miRNA	mmu-novelmiR-46-3p	chr1	157899183	157899208	+	chr1	+	156052053	156052078
premiRNA	mmu-novelmir-47	chr1	158368761	158368818	-	chr1	-	156438630	156438687
miRNA	mmu-novelmiR-47-5p	chr1	158368798	158368818	-	chr1	-	156438667	156438687
miRNA	mmu-novelmiR-47-3p	chr1	158368761	158368782	-	chr1	-	156438630	156438651
premiRNA	mmu-novelmir-48	chr1	159328362	159328428	-	chr1	-	157398231	157398297
miRNA	mmu-novelmiR-48-3p	chr1	159328362	159328383	-	chr1	-	157398231	157398252
miRNA	mmu-novelmiR-48-5p	chr1	159328408	159328428	-	chr1	-	157398277	157398297
premiRNA	mmu-novelmir-49	chr1	162836711	162836795	+	chr1	+	160906580	160906664
miRNA	mmu-novelmiR-49-3p	chr1	162836772	162836795	+	chr1	+	160906641	160906664
miRNA	mmu-novelmiR-49-5p	chr1	162836711	162836734	+	chr1	+	160906580	160906603
premiRNA	mmu-novelmir-50	chr1	167335101	167335164	-	chr1	-	165404970	165405033
miRNA	mmu-novelmiR-50-3p	chr1	167335101	167335119	-	chr1	-	165404970	165404988
miRNA	mmu-novelmiR-50-5p	chr1	167335145	167335164	-	chr1	-	165405014	165405033
premiRNA	mmu-novelmir-51	chr1	167564594	167564660	-	chr1	-	165634463	165634529
miRNA	mmu-novelmiR-51-3p	chr1	167564594	167564616	-	chr1	-	165634463	165634485
miRNA	mmu-novelmiR-51-5p	chr1	167564638	167564660	-	chr1	-	165634507	165634529
premiRNA	mmu-novelmir-52	chr1	170335686	170335747	-	chr1	-	168405555	168405616
miRNA	mmu-novelmiR-52-5p	chr1	170335728	170335747	-	chr1	-	168405597	168405616
miRNA	mmu-novelmiR-52-3p	chr1	170335686	170335707	-	chr1	-	168405555	168405576
premiRNA	mmu-novelmir-53	chr1	172636449	172636516	-	chr1	-	170706318	170706385
miRNA	mmu-novelmiR-53-5p	chr1	172636494	172636516	-	chr1	-	170706363	170706385
miRNA	mmu-novelmiR-53-3p	chr1	172636449	172636471	-	chr1	-	170706318	170706340
premiRNA	mmu-novelmir-54	chr1	173955857	173955915	-	chr1	-	172025726	172025784
miRNA	mmu-novelmiR-54-3p	chr1	173955857	173955877	-	chr1	-	172025726	172025746
miRNA	mmu-novelmiR-54-5p	chr1	173955893	173955915	-	chr1	-	172025762	172025784
premiRNA	mmu-novelmir-55	chr1	174214808	174214887	-	chr1	-	172284677	172284756
miRNA	mmu-novelmiR-55-3p	chr1	174214808	174214829	-	chr1	-	172284677	172284698
miRNA	mmu-novelmiR-55-5p	chr1	174214864	174214887	-	chr1	-	172284733	172284756
premiRNA	mmu-novelmir-56	chr1	177422623	177422677	-	chr1	-	175492492	175492546
miRNA	mmu-novelmiR-56-3p	chr1	177422623	177422643	-	chr1	-	175492492	175492512
miRNA	mmu-novelmiR-56-5p	chr1	177422659	177422677	-	chr1	-	175492528	175492546
premiRNA	mmu-novelmir-57	chr1	177823826	177823871	+	chr1	+	175893695	175893740
miRNA	mmu-novelmiR-57-3p	chr1	177823849	177823871	+	chr1	+	175893718	175893740
miRNA	mmu-novelmiR-57-5p	chr1	177823826	177823844	+	chr1	+	175893695	175893713
premiRNA	mmu-novelmir-58	chr1	182947112	182947163	-	chr1	-	181016981	181017032
miRNA	mmu-novelmiR-58-3p	chr1	182947112	182947133	-	chr1	-	181016981	181017002
miRNA	mmu-novelmiR-58-5p	chr1	182947142	182947163	-	chr1	-	181017011	181017032
premiRNA	mmu-novelmir-59	chr1	185860517	185860586	+	chr1	+	184036638	184036707
miRNA	mmu-novelmiR-59-3p	chr1	185860563	185860586	+	chr1	+	184036684	184036707
miRNA	mmu-novelmiR-59-5p	chr1	185860517	185860540	+	chr1	+	184036638	184036661
premiRNA	mmu-novelmir-60	chr1	187137202	187137258	-	chr1	-	185313323	185313379
miRNA	mmu-novelmiR-60-3p	chr1	187137202	187137223	-	chr1	-	185313323	185313344
miRNA	mmu-novelmiR-60-5p	chr1	187137239	187137258	-	chr1	-	185313360	185313379
premiRNA	mmu-novelmir-61	chr1	188088990	188089042	+	chr1	+	186265111	186265163
miRNA	mmu-novelmiR-61-3p	chr1	188089023	188089042	+	chr1	+	186265144	186265163
miRNA	mmu-novelmiR-61-5p	chr1	188088990	188089009	+	chr1	+	186265111	186265130
premiRNA	mmu-novelmir-62	chr1	190798322	190798388	-	chr1	-	188974443	188974509
miRNA	mmu-novelmiR-62-3p	chr1	190798322	190798346	-	chr1	-	188974443	188974467
miRNA	mmu-novelmiR-62-5p	chr1	190798365	190798388	-	chr1	-	188974486	188974509
premiRNA	mmu-novelmir-63	chr1	191746101	191746144	-	chr1	-	189922222	189922265
miRNA	mmu-novelmiR-63-5p	chr1	191746126	191746144	-	chr1	-	189922247	189922265
miRNA	mmu-novelmiR-63-3p	chr1	191746101	191746120	-	chr1	-	189922222	189922241
premiRNA	mmu-novelmir-64	chr1	192677172	192677226	-	chr1	-	190853293	190853347
miRNA	mmu-novelmiR-64-5p	chr1	192677204	192677226	-	chr1	-	190853325	190853347
miRNA	mmu-novelmiR-64-3p	chr1	192677172	192677192	-	chr1	-	190853293	190853313
premiRNA	mmu-novelmir-65	chr1	193822446	193822505	+	chr1	+	191998565	191998624
miRNA	mmu-novelmiR-65-3p	chr1	193822484	193822505	+	chr1	+	191998603	191998624
miRNA	mmu-novelmiR-65-5p	chr1	193822446	193822467	+	chr1	+	191998565	191998586
premiRNA	mmu-novelmir-66	chr1	195331830	195331891	-	chr1	-	193505636	193505697
miRNA	mmu-novelmiR-66-5p	chr1	195331870	195331891	-	chr1	-	193505676	193505697
miRNA	mmu-novelmiR-66-3p	chr1	195331830	195331854	-	chr1	-	193505636	193505660
premiRNA	mmu-novelmir-67	chr1	196588476	196588557	+	chr1	+	194762282	194762363
miRNA	mmu-novelmiR-67-3p	chr1	196588534	196588557	+	chr1	+	194762340	194762363
miRNA	mmu-novelmiR-67-5p	chr1	196588476	196588501	+	chr1	+	194762282	194762307
premiRNA	mmu-novelmir-68	chr1	196802786	196802843	+	chr1	+	194976592	194976649
miRNA	mmu-novelmiR-68-3p	chr1	196802821	196802843	+	chr1	+	194976627	194976649
miRNA	mmu-novelmiR-68-5p	chr1	196802786	196802804	+	chr1	+	194976592	194976610
premiRNA	mmu-novelmir-69	chr1	196914214	196914275	-	chr1	-	195088020	195088081
miRNA	mmu-novelmiR-69-5p	chr1	196914254	196914275	-	chr1	-	195088060	195088081
miRNA	mmu-novelmiR-69-3p	chr1	196914214	196914236	-	chr1	-	195088020	195088042
premiRNA	mmu-novelmir-70	chr2	3837964	3838035	-	chr2	-	3920692	3920763
miRNA	mmu-novelmiR-70-5p	chr2	3838017	3838035	-	chr2	-	3920745	3920763
miRNA	mmu-novelmiR-70-3p	chr2	3837990	3838008	-	chr2	-	3920718	3920736
premiRNA	mmu-novelmir-71	chr2	9985832	9985908	-	chr2	-	10064205	10064281
miRNA	mmu-novelmiR-71-5p	chr2	9985886	9985908	-	chr2	-	10064259	10064281
miRNA	mmu-novelmiR-71-3p	chr2	9985832	9985852	-	chr2	-	10064205	10064225
premiRNA	mmu-novelmir-72	chr2	10351907	10351965	+	chr2	+	10430280	10430338
miRNA	mmu-novelmiR-72-3p	chr2	10351944	10351965	+	chr2	+	10430317	10430338
miRNA	mmu-novelmiR-72-5p	chr2	10351907	10351928	+	chr2	+	10430280	10430301
premiRNA	mmu-novelmir-73	chr2	10422751	10422811	+	chr2	+	10501124	10501184
miRNA	mmu-novelmiR-73-5p	chr2	10422751	10422772	+	chr2	+	10501124	10501145
miRNA	mmu-novelmiR-73-3p	chr2	10422789	10422811	+	chr2	+	10501162	10501184
premiRNA	mmu-novelmir-74	chr2	10433848	10433907	+	chr2	+	10512221	10512280
miRNA	mmu-novelmiR-74-3p	chr2	10433887	10433907	+	chr2	+	10512260	10512280
miRNA	mmu-novelmiR-74-5p	chr2	10433848	10433869	+	chr2	+	10512221	10512242
premiRNA	mmu-novelmir-75	chr2	18098869	18098932	+	chr2	+	18177242	18177305
miRNA	mmu-novelmiR-75-3p	chr2	18098910	18098932	+	chr2	+	18177283	18177305
miRNA	mmu-novelmiR-75-5p	chr2	18098869	18098890	+	chr2	+	18177242	18177263
premiRNA	mmu-novelmir-76	chr2	18129409	18129477	-	chr2	-	18207782	18207850
miRNA	mmu-novelmiR-76-5p	chr2	18129456	18129477	-	chr2	-	18207829	18207850
miRNA	mmu-novelmiR-76-3p	chr2	18129409	18129435	-	chr2	-	18207782	18207808
premiRNA	mmu-novelmir-77	chr2	19599182	19599241	+	chr2	+	19677555	19677614
miRNA	mmu-novelmiR-77-3p	chr2	19599219	19599241	+	chr2	+	19677592	19677614
miRNA	mmu-novelmiR-77-5p	chr2	19599182	19599199	+	chr2	+	19677555	19677572
premiRNA	mmu-novelmir-78	chr2	20891398	20891449	+	chr2	+	20969771	20969822
miRNA	mmu-novelmiR-78-5p	chr2	20891398	20891419	+	chr2	+	20969771	20969792
miRNA	mmu-novelmiR-78-3p	chr2	20891429	20891449	+	chr2	+	20969802	20969822
premiRNA	mmu-novelmir-79	chr2	21289200	21289250	+	chr2	+	21367573	21367623
miRNA	mmu-novelmiR-79-3p	chr2	21289231	21289250	+	chr2	+	21367604	21367623
miRNA	mmu-novelmiR-79-5p	chr2	21289200	21289219	+	chr2	+	21367573	21367592
premiRNA	mmu-novelmir-80	chr2	22506611	22506669	+	chr2	+	22651091	22651149
miRNA	mmu-novelmiR-80-5p	chr2	22506611	22506632	+	chr2	+	22651091	22651112
miRNA	mmu-novelmiR-80-3p	chr2	22506647	22506669	+	chr2	+	22651127	22651149
premiRNA	mmu-novelmir-81	chr2	25278160	25278250	-	chr2	-	25422640	25422730
miRNA	mmu-novelmiR-81-3p	chr2	25278160	25278182	-	chr2	-	25422640	25422662
miRNA	mmu-novelmiR-81-5p	chr2	25278227	25278250	-	chr2	-	25422707	25422730
premiRNA	mmu-novelmir-82	chr2	25754959	25755017	+	chr2	+	25899439	25899497
miRNA	mmu-novelmiR-82-5p	chr2	25754959	25754982	+	chr2	+	25899439	25899462
miRNA	mmu-novelmiR-82-3p	chr2	25754996	25755017	+	chr2	+	25899476	25899497
premiRNA	mmu-novelmir-83	chr2	26180795	26180860	+	chr2	+	26325275	26325340
miRNA	mmu-novelmiR-83-3p	chr2	26180838	26180860	+	chr2	+	26325318	26325340
miRNA	mmu-novelmiR-83-5p	chr2	26180795	26180818	+	chr2	+	26325275	26325298
premiRNA	mmu-novelmir-84	chr2	26764984	26765045	-	chr2	-	26909464	26909525
miRNA	mmu-novelmiR-84-5p	chr2	26765024	26765045	-	chr2	-	26909504	26909525
miRNA	mmu-novelmiR-84-3p	chr2	26764984	26765006	-	chr2	-	26909464	26909486
premiRNA	mmu-novelmir-85	chr2	27118444	27118525	-	chr2	-	27262924	27263005
miRNA	mmu-novelmiR-85-5p	chr2	27118502	27118525	-	chr2	-	27262982	27263005
miRNA	mmu-novelmiR-85-3p	chr2	27118444	27118465	-	chr2	-	27262924	27262945
premiRNA	mmu-novelmir-86	chr2	27888257	27888344	+	chr2	+	28032737	28032824
miRNA	mmu-novelmiR-86-5p	chr2	27888257	27888278	+	chr2	+	28032737	28032758
miRNA	mmu-novelmiR-86-3p	chr2	27888326	27888344	+	chr2	+	28032806	28032824
premiRNA	mmu-novelmir-87	chr2	28351454	28351502	+	chr2	+	28495934	28495982
miRNA	mmu-novelmiR-87-5p	chr2	28351454	28351472	+	chr2	+	28495934	28495952
miRNA	mmu-novelmiR-87-3p	chr2	28351483	28351502	+	chr2	+	28495963	28495982
premiRNA	mmu-novelmir-88	chr2	28424622	28424681	-	chr2	-	28569102	28569161
miRNA	mmu-novelmiR-88-5p	chr2	28424660	28424681	-	chr2	-	28569140	28569161
miRNA	mmu-novelmiR-88-3p	chr2	28424622	28424645	-	chr2	-	28569102	28569125
premiRNA	mmu-novelmir-89	chr2	28678487	28678547	-	chr2	-	28822967	28823027
miRNA	mmu-novelmiR-89-5p	chr2	28678523	28678547	-	chr2	-	28823003	28823027
miRNA	mmu-novelmiR-89-3p	chr2	28678487	28678508	-	chr2	-	28822967	28822988
premiRNA	mmu-novelmir-90	chr2	29023493	29023539	+	chr2	+	29167973	29168019
miRNA	mmu-novelmiR-90-3p	chr2	29023517	29023539	+	chr2	+	29167997	29168019
miRNA	mmu-novelmiR-90-5p	chr2	29023493	29023514	+	chr2	+	29167973	29167994
premiRNA	mmu-novelmir-91	chr2	30400740	30400832	+	chr2	+	30545220	30545312
miRNA	mmu-novelmiR-91-5p	chr2	30400740	30400764	+	chr2	+	30545220	30545244
miRNA	mmu-novelmiR-91-3p	chr2	30400808	30400832	+	chr2	+	30545288	30545312
premiRNA	mmu-novelmir-92	chr2	30532421	30532482	+	chr2	+	30676901	30676962
miRNA	mmu-novelmiR-92-3p	chr2	30532461	30532482	+	chr2	+	30676941	30676962
miRNA	mmu-novelmiR-92-5p	chr2	30532421	30532443	+	chr2	+	30676901	30676923
premiRNA	mmu-novelmir-93	chr2	30575808	30575877	+	chr2	+	30720288	30720357
miRNA	mmu-novelmiR-93-5p	chr2	30575808	30575829	+	chr2	+	30720288	30720309
miRNA	mmu-novelmiR-93-3p	chr2	30575855	30575877	+	chr2	+	30720335	30720357
premiRNA	mmu-novelmir-94	chr2	30985930	30985993	-	chr2	-	31130410	31130473
miRNA	mmu-novelmiR-94-5p	chr2	30985971	30985993	-	chr2	-	31130451	31130473
miRNA	mmu-novelmiR-94-3p	chr2	30985930	30985952	-	chr2	-	31130410	31130432
premiRNA	mmu-novelmir-95	chr2	31474690	31474753	+	chr2	+	31619170	31619233
miRNA	mmu-novelmiR-95-3p	chr2	31474732	31474753	+	chr2	+	31619212	31619233
miRNA	mmu-novelmiR-95-5p	chr2	31474690	31474711	+	chr2	+	31619170	31619191
premiRNA	mmu-novelmir-96	chr2	31879357	31879420	+	chr2	+	32023837	32023900
miRNA	mmu-novelmiR-96-5p	chr2	31879357	31879381	+	chr2	+	32023837	32023861
miRNA	mmu-novelmiR-96-3p	chr2	31879397	31879420	+	chr2	+	32023877	32023900
premiRNA	mmu-novelmir-97	chr2	32027977	32028060	+	chr2	+	32172457	32172540
miRNA	mmu-novelmiR-97-3p	chr2	32028038	32028060	+	chr2	+	32172518	32172540
miRNA	mmu-novelmiR-97-5p	chr2	32027977	32027995	+	chr2	+	32172457	32172475
premiRNA	mmu-novelmir-98	chr2	32039916	32039975	+	chr2	+	32184396	32184455
miRNA	mmu-novelmiR-98-5p	chr2	32039916	32039937	+	chr2	+	32184396	32184417
miRNA	mmu-novelmiR-98-3p	chr2	32039953	32039975	+	chr2	+	32184433	32184455
premiRNA	mmu-novelmir-99	chr2	32444905	32444964	+	chr2	+	32589385	32589444
miRNA	mmu-novelmiR-99-3p	chr2	32444943	32444964	+	chr2	+	32589423	32589444
miRNA	mmu-novelmiR-99-5p	chr2	32444905	32444927	+	chr2	+	32589385	32589407
premiRNA	mmu-novelmir-100	chr2	33099679	33099759	+	chr2	+	33244159	33244239
miRNA	mmu-novelmiR-100-5p	chr2	33099679	33099700	+	chr2	+	33244159	33244180
miRNA	mmu-novelmiR-100-3p	chr2	33099738	33099759	+	chr2	+	33244218	33244239
premiRNA	mmu-novelmir-101	chr2	35016034	35016082	+	chr2	+	35160514	35160562
miRNA	mmu-novelmiR-101-3p	chr2	35016061	35016082	+	chr2	+	35160541	35160562
miRNA	mmu-novelmiR-101-5p	chr2	35016034	35016056	+	chr2	+	35160514	35160536
premiRNA	mmu-novelmir-102	chr2	35191710	35191780	-	chr2	-	35336190	35336260
miRNA	mmu-novelmiR-102-3p	chr2	35191710	35191730	-	chr2	-	35336190	35336210
miRNA	mmu-novelmiR-102-5p	chr2	35191763	35191780	-	chr2	-	35336243	35336260
premiRNA	mmu-novelmir-103	chr2	36264017	36264062	+	chr2	+	36408497	36408542
miRNA	mmu-novelmiR-103-5p	chr2	36264017	36264034	+	chr2	+	36408497	36408514
miRNA	mmu-novelmiR-103-3p	chr2	36264047	36264062	+	chr2	+	36408527	36408542
premiRNA	mmu-novelmir-104	chr2	38426900	38426962	+	chr2	+	38571380	38571442
miRNA	mmu-novelmiR-104-5p	chr2	38426900	38426920	+	chr2	+	38571380	38571400
miRNA	mmu-novelmiR-104-3p	chr2	38426941	38426962	+	chr2	+	38571421	38571442
premiRNA	mmu-novelmir-105	chr2	44894935	44894997	-	chr2	-	45039415	45039477
miRNA	mmu-novelmiR-105-3p	chr2	44894935	44894956	-	chr2	-	45039415	45039436
miRNA	mmu-novelmiR-105-5p	chr2	44894977	44894997	-	chr2	-	45039457	45039477
premiRNA	mmu-novelmir-106	chr2	52280399	52280483	-	chr2	-	52424879	52424963
miRNA	mmu-novelmiR-106-5p	chr2	52280466	52280483	-	chr2	-	52424946	52424963
miRNA	mmu-novelmiR-106-3p	chr2	52280399	52280419	-	chr2	-	52424879	52424899
premiRNA	mmu-novelmir-107	chr2	60047803	60047888	-	chr2	-	60209746	60209831
miRNA	mmu-novelmiR-107-3p	chr2	60047803	60047826	-	chr2	-	60209746	60209769
miRNA	mmu-novelmiR-107-5p	chr2	60047869	60047888	-	chr2	-	60209812	60209831
premiRNA	mmu-novelmir-108	chr2	63887796	63887871	-	chr2	-	64049739	64049814
miRNA	mmu-novelmiR-108-3p	chr2	63887796	63887817	-	chr2	-	64049739	64049760
miRNA	mmu-novelmiR-108-5p	chr2	63887851	63887871	-	chr2	-	64049794	64049814
premiRNA	mmu-novelmir-109	chr2	68052633	68052688	-	chr2	-	68214576	68214631
miRNA	mmu-novelmiR-109-3p	chr2	68052633	68052653	-	chr2	-	68214576	68214596
miRNA	mmu-novelmiR-109-5p	chr2	68052666	68052688	-	chr2	-	68214609	68214631
premiRNA	mmu-novelmir-110	chr2	73117843	73117904	+	chr2	+	73279786	73279847
miRNA	mmu-novelmiR-110-3p	chr2	73117882	73117904	+	chr2	+	73279825	73279847
miRNA	mmu-novelmiR-110-5p	chr2	73117843	73117864	+	chr2	+	73279786	73279807
premiRNA	mmu-novelmir-111	chr2	73158322	73158375	+	chr2	+	73320265	73320318
miRNA	mmu-novelmiR-111-5p	chr2	73158322	73158342	+	chr2	+	73320265	73320285
miRNA	mmu-novelmiR-111-3p	chr2	73158355	73158375	+	chr2	+	73320298	73320318
premiRNA	mmu-novelmir-112	chr2	73476352	73476409	-	chr2	-	73638295	73638352
miRNA	mmu-novelmiR-112-3p	chr2	73476352	73476373	-	chr2	-	73638295	73638316
miRNA	mmu-novelmiR-112-5p	chr2	73476387	73476409	-	chr2	-	73638330	73638352
premiRNA	mmu-novelmir-113	chr2	73730488	73730590	-	chr2	-	73892431	73892533
miRNA	mmu-novelmiR-113-5p	chr2	73730572	73730590	-	chr2	-	73892515	73892533
miRNA	mmu-novelmiR-113-3p	chr2	73730488	73730506	-	chr2	-	73892431	73892449
premiRNA	mmu-novelmir-114	chr2	76221341	76221400	+	chr2	+	76383284	76383343
miRNA	mmu-novelmiR-114-3p	chr2	76221378	76221400	+	chr2	+	76383321	76383343
miRNA	mmu-novelmiR-114-5p	chr2	76221341	76221360	+	chr2	+	76383284	76383303
premiRNA	mmu-novelmir-115	chr2	80183792	80183869	+	chr2	+	80343635	80343712
miRNA	mmu-novelmiR-115-3p	chr2	80183851	80183869	+	chr2	+	80343694	80343712
miRNA	mmu-novelmiR-115-5p	chr2	80183792	80183811	+	chr2	+	80343635	80343654
premiRNA	mmu-novelmir-116	chr2	83672977	83673029	+	chr2	+	83832820	83832872
miRNA	mmu-novelmiR-116-3p	chr2	83673006	83673029	+	chr2	+	83832849	83832872
miRNA	mmu-novelmiR-116-5p	chr2	83672977	83672998	+	chr2	+	83832820	83832841
premiRNA	mmu-novelmir-117	chr2	90670297	90670362	-	chr2	-	90830140	90830205
miRNA	mmu-novelmiR-117-5p	chr2	90670340	90670362	-	chr2	-	90830183	90830205
miRNA	mmu-novelmiR-117-3p	chr2	90670297	90670317	-	chr2	-	90830140	90830160
premiRNA	mmu-novelmir-118	chr2	91044506	91044567	+	chr2	+	91204349	91204410
miRNA	mmu-novelmiR-118-3p	chr2	91044548	91044567	+	chr2	+	91204391	91204410
miRNA	mmu-novelmiR-118-5p	chr2	91044506	91044530	+	chr2	+	91204349	91204373
premiRNA	mmu-novelmir-119	chr2	91495538	91495598	+	chr2	+	91655381	91655441
miRNA	mmu-novelmiR-119-3p	chr2	91495580	91495598	+	chr2	+	91655423	91655441
miRNA	mmu-novelmiR-119-5p	chr2	91495538	91495557	+	chr2	+	91655381	91655400
premiRNA	mmu-novelmir-120	chr2	92184958	92185034	+	chr2	+	92344801	92344877
miRNA	mmu-novelmiR-120-3p	chr2	92185013	92185034	+	chr2	+	92344856	92344877
miRNA	mmu-novelmiR-120-5p	chr2	92184958	92184980	+	chr2	+	92344801	92344823
premiRNA	mmu-novelmir-121	chr2	93067033	93067097	-	chr2	-	93226876	93226940
miRNA	mmu-novelmiR-121-5p	chr2	93067074	93067097	-	chr2	-	93226917	93226940
miRNA	mmu-novelmiR-121-3p	chr2	93067033	93067054	-	chr2	-	93226876	93226897
premiRNA	mmu-novelmir-122	chr2	94087142	94087193	-	chr2	-	94246985	94247036
miRNA	mmu-novelmiR-122-3p	chr2	94087142	94087163	-	chr2	-	94246985	94247006
miRNA	mmu-novelmiR-122-5p	chr2	94087174	94087193	-	chr2	-	94247017	94247036
premiRNA	mmu-novelmir-123	chr2	102241503	102241587	+	chr2	+	102401346	102401430
miRNA	mmu-novelmiR-123-5p	chr2	102241503	102241521	+	chr2	+	102401346	102401364
miRNA	mmu-novelmiR-123-3p	chr2	102241567	102241587	+	chr2	+	102401410	102401430
premiRNA	mmu-novelmir-124	chr2	104522828	104522884	-	chr2	-	104682671	104682727
miRNA	mmu-novelmiR-124-3p	chr2	104522828	104522848	-	chr2	-	104682671	104682691
miRNA	mmu-novelmiR-124-5p	chr2	104522863	104522884	-	chr2	-	104682706	104682727
premiRNA	mmu-novelmir-125	chr2	112341025	112341085	+	chr2	+	112500868	112500928
miRNA	mmu-novelmiR-125-5p	chr2	112341025	112341042	+	chr2	+	112500868	112500885
miRNA	mmu-novelmiR-125-3p	chr2	112341068	112341085	+	chr2	+	112500911	112500928
premiRNA	mmu-novelmir-126	chr2	118999186	118999239	+	chr2	+	119173450	119173503
miRNA	mmu-novelmiR-126-5p	chr2	118999186	118999205	+	chr2	+	119173450	119173469
miRNA	mmu-novelmiR-126-3p	chr2	118999220	118999239	+	chr2	+	119173484	119173503
premiRNA	mmu-novelmir-127	chr2	119517780	119517849	+	chr2	+	119692044	119692113
miRNA	mmu-novelmiR-127-3p	chr2	119517828	119517849	+	chr2	+	119692092	119692113
miRNA	mmu-novelmiR-127-5p	chr2	119517780	119517801	+	chr2	+	119692044	119692065
premiRNA	mmu-novelmir-128	chr2	119526950	119526994	+	chr2	+	119701214	119701258
miRNA	mmu-novelmiR-128-3p	chr2	119526976	119526994	+	chr2	+	119701240	119701258
miRNA	mmu-novelmiR-128-5p	chr2	119526950	119526969	+	chr2	+	119701214	119701233
premiRNA	mmu-novelmir-129	chr2	120527189	120527248	+	chr2	+	120701453	120701512
miRNA	mmu-novelmiR-129-3p	chr2	120527226	120527248	+	chr2	+	120701490	120701512
miRNA	mmu-novelmiR-129-5p	chr2	120527189	120527211	+	chr2	+	120701453	120701475
premiRNA	mmu-novelmir-130	chr2	121301271	121301334	+	chr2	+	121475535	121475598
miRNA	mmu-novelmiR-130-5p	chr2	121301271	121301293	+	chr2	+	121475535	121475557
miRNA	mmu-novelmiR-130-3p	chr2	121301313	121301334	+	chr2	+	121475577	121475598
premiRNA	mmu-novelmir-131	chr2	121334323	121334411	+	chr2	+	121508587	121508675
miRNA	mmu-novelmiR-131-5p	chr2	121334323	121334342	+	chr2	+	121508587	121508606
miRNA	mmu-novelmiR-131-3p	chr2	121334396	121334411	+	chr2	+	121508660	121508675
premiRNA	mmu-novelmir-132	chr2	121407672	121407728	-	chr2	-	121581936	121581992
miRNA	mmu-novelmiR-132-3p	chr2	121407672	121407692	-	chr2	-	121581936	121581956
miRNA	mmu-novelmiR-132-5p	chr2	121407706	121407728	-	chr2	-	121581970	121581992
premiRNA	mmu-novelmir-133	chr2	122573092	122573140	+	chr2	+	122747356	122747404
miRNA	mmu-novelmiR-133-5p	chr2	122573092	122573110	+	chr2	+	122747356	122747374
miRNA	mmu-novelmiR-133-3p	chr2	122573117	122573140	+	chr2	+	122747381	122747404
premiRNA	mmu-novelmir-134	chr2	124247712	124247785	+	chr2	+	124421976	124422049
miRNA	mmu-novelmiR-134-5p	chr2	124247712	124247733	+	chr2	+	124421976	124421997
miRNA	mmu-novelmiR-134-3p	chr2	124247760	124247785	+	chr2	+	124422024	124422049
premiRNA	mmu-novelmir-135	chr2	125685018	125685077	+	chr2	+	125859282	125859341
miRNA	mmu-novelmiR-135-3p	chr2	125685056	125685077	+	chr2	+	125859320	125859341
miRNA	mmu-novelmiR-135-5p	chr2	125685018	125685040	+	chr2	+	125859282	125859304
premiRNA	mmu-novelmir-136	chr2	126714197	126714258	-	chr2	-	126888461	126888522
miRNA	mmu-novelmiR-136-3p	chr2	126714197	126714219	-	chr2	-	126888461	126888483
miRNA	mmu-novelmiR-136-5p	chr2	126714235	126714258	-	chr2	-	126888499	126888522
premiRNA	mmu-novelmir-137	chr2	126719827	126719877	-	chr2	-	126894091	126894141
miRNA	mmu-novelmiR-137-5p	chr2	126719857	126719877	-	chr2	-	126894121	126894141
miRNA	mmu-novelmiR-137-3p	chr2	126719827	126719847	-	chr2	-	126894091	126894111
premiRNA	mmu-novelmir-138	chr2	129998690	129998771	-	chr2	-	130172954	130173035
miRNA	mmu-novelmiR-138-3p	chr2	129998690	129998714	-	chr2	-	130172954	130172978
miRNA	mmu-novelmiR-138-5p	chr2	129998747	129998771	-	chr2	-	130173011	130173035
premiRNA	mmu-novelmir-139	chr2	132536505	132536563	+	chr2	+	132710769	132710827
miRNA	mmu-novelmiR-139-5p	chr2	132536505	132536527	+	chr2	+	132710769	132710791
miRNA	mmu-novelmiR-139-3p	chr2	132536542	132536563	+	chr2	+	132710806	132710827
premiRNA	mmu-novelmir-140	chr2	136772871	136772927	+	chr2	+	136947135	136947191
miRNA	mmu-novelmiR-140-5p	chr2	136772871	136772892	+	chr2	+	136947135	136947156
miRNA	mmu-novelmiR-140-3p	chr2	136772905	136772927	+	chr2	+	136947169	136947191
premiRNA	mmu-novelmir-141	chr2	136942834	136942877	+	chr2	+	137117098	137117141
miRNA	mmu-novelmiR-141-3p	chr2	136942860	136942877	+	chr2	+	137117124	137117141
miRNA	mmu-novelmiR-141-5p	chr2	136942834	136942853	+	chr2	+	137117098	137117117
premiRNA	mmu-novelmir-142	chr2	138670113	138670173	+	chr2	+	138844377	138844437
miRNA	mmu-novelmiR-142-3p	chr2	138670149	138670173	+	chr2	+	138844413	138844437
miRNA	mmu-novelmiR-142-5p	chr2	138670113	138670136	+	chr2	+	138844377	138844400
premiRNA	mmu-novelmir-143	chr2	143969393	143969437	-	chr2	-	144143657	144143701
miRNA	mmu-novelmiR-143-3p	chr2	143969393	143969413	-	chr2	-	144143657	144143677
miRNA	mmu-novelmiR-143-5p	chr2	143969421	143969437	-	chr2	-	144143685	144143701
premiRNA	mmu-novelmir-144	chr2	148700872	148700947	+	chr2	+	148875136	148875211
miRNA	mmu-novelmiR-144-5p	chr2	148700872	148700889	+	chr2	+	148875136	148875153
miRNA	mmu-novelmiR-144-3p	chr2	148700928	148700947	+	chr2	+	148875192	148875211
premiRNA	mmu-novelmir-145	chr2	151797021	151797081	-	chr2	-	151971285	151971345
miRNA	mmu-novelmiR-145-5p	chr2	151797060	151797081	-	chr2	-	151971324	151971345
miRNA	mmu-novelmiR-145-3p	chr2	151797021	151797043	-	chr2	-	151971285	151971307
premiRNA	mmu-novelmir-146	chr2	152171368	152171424	+	chr2	+	152345632	152345688
miRNA	mmu-novelmiR-146-3p	chr2	152171403	152171424	+	chr2	+	152345667	152345688
miRNA	mmu-novelmiR-146-5p	chr2	152171368	152171391	+	chr2	+	152345632	152345655
premiRNA	mmu-novelmir-147	chr2	154362621	154362676	+	chr2	+	154536885	154536940
miRNA	mmu-novelmiR-147-5p	chr2	154362621	154362639	+	chr2	+	154536885	154536903
miRNA	mmu-novelmiR-147-3p	chr2	154362659	154362676	+	chr2	+	154536923	154536940
premiRNA	mmu-novelmir-148	chr2	155455275	155455340	-	chr2	-	155629539	155629604
miRNA	mmu-novelmiR-148-3p	chr2	155455275	155455297	-	chr2	-	155629539	155629561
miRNA	mmu-novelmiR-148-5p	chr2	155455322	155455340	-	chr2	-	155629586	155629604
premiRNA	mmu-novelmir-149	chr2	155531381	155531445	-	chr2	-	155705645	155705709
miRNA	mmu-novelmiR-149-5p	chr2	155531427	155531445	-	chr2	-	155705691	155705709
miRNA	mmu-novelmiR-149-3p	chr2	155531381	155531403	-	chr2	-	155705645	155705667
premiRNA	mmu-novelmir-150	chr2	155755937	155756009	-	chr2	-	155930201	155930273
miRNA	mmu-novelmiR-150-5p	chr2	155755992	155756009	-	chr2	-	155930256	155930273
miRNA	mmu-novelmiR-150-3p	chr2	155755937	155755957	-	chr2	-	155930201	155930221
premiRNA	mmu-novelmir-151	chr2	156117949	156117988	+	chr2	+	156292213	156292252
miRNA	mmu-novelmiR-151-3p	chr2	156117971	156117988	+	chr2	+	156292235	156292252
miRNA	mmu-novelmiR-151-5p	chr2	156117949	156117967	+	chr2	+	156292213	156292231
premiRNA	mmu-novelmir-152	chr2	156187659	156187714	-	chr2	-	156361923	156361978
miRNA	mmu-novelmiR-152-3p	chr2	156187659	156187683	-	chr2	-	156361923	156361947
miRNA	mmu-novelmiR-152-5p	chr2	156187688	156187714	-	chr2	-	156361952	156361978
premiRNA	mmu-novelmir-153	chr2	157119889	157119945	+	chr2	+	157294153	157294209
miRNA	mmu-novelmiR-153-5p	chr2	157119889	157119909	+	chr2	+	157294153	157294173
miRNA	mmu-novelmiR-153-3p	chr2	157119925	157119945	+	chr2	+	157294189	157294209
premiRNA	mmu-novelmir-154	chr2	157387047	157387130	-	chr2	-	157561311	157561394
miRNA	mmu-novelmiR-154-3p	chr2	157387047	157387067	-	chr2	-	157561311	157561331
miRNA	mmu-novelmiR-154-5p	chr2	157387109	157387130	-	chr2	-	157561373	157561394
premiRNA	mmu-novelmir-155	chr2	158540141	158540225	+	chr2	+	158714405	158714489
miRNA	mmu-novelmiR-155-3p	chr2	158540202	158540225	+	chr2	+	158714466	158714489
miRNA	mmu-novelmiR-155-5p	chr2	158540141	158540168	+	chr2	+	158714405	158714432
premiRNA	mmu-novelmir-156	chr2	163427655	163427729	-	chr2	-	163601919	163601993
miRNA	mmu-novelmiR-156-5p	chr2	163427706	163427729	-	chr2	-	163601970	163601993
miRNA	mmu-novelmiR-156-3p	chr2	163427655	163427675	-	chr2	-	163601919	163601939
premiRNA	mmu-novelmir-157	chr2	163451960	163452046	-	chr2	-	163626224	163626310
miRNA	mmu-novelmiR-157-5p	chr2	163452026	163452046	-	chr2	-	163626290	163626310
miRNA	mmu-novelmiR-157-3p	chr2	163451960	163451981	-	chr2	-	163626224	163626245
premiRNA	mmu-novelmir-158	chr2	164704461	164704521	-	chr2	-	164878961	164879021
miRNA	mmu-novelmiR-158-5p	chr2	164704500	164704521	-	chr2	-	164879000	164879021
miRNA	mmu-novelmiR-158-3p	chr2	164704461	164704482	-	chr2	-	164878961	164878982
premiRNA	mmu-novelmir-159	chr2	165693562	165693633	-	chr2	-	165868062	165868133
miRNA	mmu-novelmiR-159-3p	chr2	165693562	165693583	-	chr2	-	165868062	165868083
miRNA	mmu-novelmiR-159-5p	chr2	165693613	165693633	-	chr2	-	165868113	165868133
premiRNA	mmu-novelmir-160	chr2	165905993	165906057	-	chr2	-	166080493	166080557
miRNA	mmu-novelmiR-160-5p	chr2	165906034	165906057	-	chr2	-	166080534	166080557
miRNA	mmu-novelmiR-160-3p	chr2	165905993	165906014	-	chr2	-	166080493	166080514
premiRNA	mmu-novelmir-161	chr2	166435218	166435284	-	chr2	-	166609718	166609784
miRNA	mmu-novelmiR-161-5p	chr2	166435266	166435284	-	chr2	-	166609766	166609784
miRNA	mmu-novelmiR-161-3p	chr2	166435218	166435231	-	chr2	-	166609718	166609731
premiRNA	mmu-novelmir-162	chr2	166691884	166691962	+	chr2	+	166866384	166866462
miRNA	mmu-novelmiR-162-3p	chr2	166691940	166691962	+	chr2	+	166866440	166866462
miRNA	mmu-novelmiR-162-5p	chr2	166691884	166691907	+	chr2	+	166866384	166866407
premiRNA	mmu-novelmir-163	chr2	167002256	167002316	-	chr2	-	167176756	167176816
miRNA	mmu-novelmiR-163-5p	chr2	167002296	167002316	-	chr2	-	167176796	167176816
miRNA	mmu-novelmiR-163-3p	chr2	167002256	167002278	-	chr2	-	167176756	167176778
premiRNA	mmu-novelmir-164	chr2	167979435	167979491	-	chr2	-	168153935	168153991
miRNA	mmu-novelmiR-164-3p	chr2	167979435	167979457	-	chr2	-	168153935	168153957
miRNA	mmu-novelmiR-164-5p	chr2	167979470	167979491	-	chr2	-	168153970	168153991
premiRNA	mmu-novelmir-165	chr2	168056702	168056763	+	chr2	+	168231202	168231263
miRNA	mmu-novelmiR-165-5p	chr2	168056702	168056722	+	chr2	+	168231202	168231222
miRNA	mmu-novelmiR-165-3p	chr2	168056742	168056763	+	chr2	+	168231242	168231263
premiRNA	mmu-novelmir-166	chr2	172196398	172196475	+	chr2	+	172370898	172370975
miRNA	mmu-novelmiR-166-3p	chr2	172196452	172196475	+	chr2	+	172370952	172370975
miRNA	mmu-novelmiR-166-5p	chr2	172196398	172196416	+	chr2	+	172370898	172370916
premiRNA	mmu-novelmir-167	chr2	173044318	173044368	-	chr2	-	173218817	173218867
miRNA	mmu-novelmiR-167-5p	chr2	173044346	173044368	-	chr2	-	173218845	173218867
miRNA	mmu-novelmiR-167-3p	chr2	173044318	173044339	-	chr2	-	173218817	173218838
premiRNA	mmu-novelmir-168	chr2	173101823	173101910	-	chr2	-	173276322	173276409
miRNA	mmu-novelmiR-168-3p	chr2	173101823	173101843	-	chr2	-	173276322	173276342
miRNA	mmu-novelmiR-168-5p	chr2	173101889	173101910	-	chr2	-	173276388	173276409
premiRNA	mmu-novelmir-169	chr2	173607908	173607973	+	chr2	+	173782407	173782472
miRNA	mmu-novelmiR-169-3p	chr2	173607952	173607973	+	chr2	+	173782451	173782472
miRNA	mmu-novelmiR-169-5p	chr2	173607908	173607930	+	chr2	+	173782407	173782429
premiRNA	mmu-novelmir-170	chr2	173928277	173928362	+	chr2	+	174102776	174102861
miRNA	mmu-novelmiR-170-3p	chr2	173928344	173928362	+	chr2	+	174102843	174102861
miRNA	mmu-novelmiR-170-5p	chr2	173928277	173928298	+	chr2	+	174102776	174102797
premiRNA	mmu-novelmir-171	chr2	174109822	174109865	+	chr2	+	174284321	174284364
miRNA	mmu-novelmiR-171-3p	chr2	174109844	174109865	+	chr2	+	174284343	174284364
miRNA	mmu-novelmiR-171-5p	chr2	174109822	174109843	+	chr2	+	174284321	174284342
premiRNA	mmu-novelmir-172	chr2	174155593	174155646	+	chr2	+	174330092	174330145
miRNA	mmu-novelmiR-172-3p	chr2	174155626	174155646	+	chr2	+	174330125	174330145
miRNA	mmu-novelmiR-172-5p	chr2	174155593	174155612	+	chr2	+	174330092	174330111
premiRNA	mmu-novelmir-173	chr2	174171683	174171740	+	chr2	+	174346182	174346239
miRNA	mmu-novelmiR-173-3p	chr2	174171719	174171740	+	chr2	+	174346218	174346239
miRNA	mmu-novelmiR-173-5p	chr2	174171683	174171706	+	chr2	+	174346182	174346205
premiRNA	mmu-novelmir-174	chr2	179710412	179710474	-	chr2	-	179975707	179975769
miRNA	mmu-novelmiR-174-3p	chr2	179710412	179710429	-	chr2	-	179975707	179975724
miRNA	mmu-novelmiR-174-5p	chr2	179710455	179710474	-	chr2	-	179975750	179975769
premiRNA	mmu-novelmir-175	chr2	179779089	179779161	+	chr2	+	180044384	180044456
miRNA	mmu-novelmiR-175-3p	chr2	179779139	179779161	+	chr2	+	180044434	180044456
miRNA	mmu-novelmiR-175-5p	chr2	179779089	179779110	+	chr2	+	180044384	180044405
premiRNA	mmu-novelmir-176	chr2	179923982	179924035	-	chr2	-	180189277	180189330
miRNA	mmu-novelmiR-176-3p	chr2	179923982	179924000	-	chr2	-	180189277	180189295
miRNA	mmu-novelmiR-176-5p	chr2	179924017	179924035	-	chr2	-	180189312	180189330
premiRNA	mmu-novelmir-177	chr2	180628749	180628806	-	chr2	-	180894044	180894101
miRNA	mmu-novelmiR-177-3p	chr2	180628749	180628770	-	chr2	-	180894044	180894065
miRNA	mmu-novelmiR-177-5p	chr2	180628785	180628806	-	chr2	-	180894080	180894101
premiRNA	mmu-novelmir-178	chr2	180652786	180652841	-	chr2	-	180918081	180918136
miRNA	mmu-novelmiR-178-3p	chr2	180652786	180652807	-	chr2	-	180918081	180918102
miRNA	mmu-novelmiR-178-5p	chr2	180652821	180652841	-	chr2	-	180918116	180918136
premiRNA	mmu-novelmir-179	chr2	180971628	180971688	-	chr2	-	181236923	181236983
miRNA	mmu-novelmiR-179-5p	chr2	180971666	180971688	-	chr2	-	181236961	181236983
miRNA	mmu-novelmiR-179-3p	chr2	180971628	180971648	-	chr2	-	181236923	181236943
premiRNA	mmu-novelmir-180	chr2	181114395	181114463	+	chr2	+	181379690	181379758
miRNA	mmu-novelmiR-180-3p	chr2	181114440	181114463	+	chr2	+	181379735	181379758
miRNA	mmu-novelmiR-180-5p	chr2	181114395	181114416	+	chr2	+	181379690	181379711
premiRNA	mmu-novelmir-181	chr2	181335803	181335867	-	chr2	-	181601098	181601162
miRNA	mmu-novelmiR-181-3p	chr2	181335803	181335823	-	chr2	-	181601098	181601118
miRNA	mmu-novelmiR-181-5p	chr2	181335844	181335867	-	chr2	-	181601139	181601162
premiRNA	mmu-novelmir-182	chr3	5242583	5242624	+	chr3	+	5242583	5242624
miRNA	mmu-novelmiR-182-5p	chr3	5242583	5242603	+	chr3	+	5242583	5242603
miRNA	mmu-novelmiR-182-3p	chr3	5242606	5242624	+	chr3	+	5242606	5242624
premiRNA	mmu-novelmir-183	chr3	16082981	16083064	-	chr3	-	16182981	16183064
miRNA	mmu-novelmiR-183-5p	chr3	16083046	16083064	-	chr3	-	16183046	16183064
miRNA	mmu-novelmiR-183-3p	chr3	16082981	16082999	-	chr3	-	16182981	16182999
premiRNA	mmu-novelmir-184	chr3	16478356	16478430	+	chr3	+	16578356	16578430
miRNA	mmu-novelmiR-184-3p	chr3	16478413	16478430	+	chr3	+	16578413	16578430
miRNA	mmu-novelmiR-184-5p	chr3	16478356	16478375	+	chr3	+	16578356	16578375
premiRNA	mmu-novelmir-185	chr3	17695684	17695742	-	chr3	-	17795684	17795742
miRNA	mmu-novelmiR-185-3p	chr3	17695684	17695705	-	chr3	-	17795684	17795705
miRNA	mmu-novelmiR-185-5p	chr3	17695721	17695742	-	chr3	-	17795721	17795742
premiRNA	mmu-novelmir-186	chr3	19912007	19912062	-	chr3	-	20012007	20012062
miRNA	mmu-novelmiR-186-5p	chr3	19912040	19912062	-	chr3	-	20012040	20012062
miRNA	mmu-novelmiR-186-3p	chr3	19912007	19912028	-	chr3	-	20012007	20012028
premiRNA	mmu-novelmir-187	chr3	28891268	28891327	+	chr3	+	28992346	28992405
miRNA	mmu-novelmiR-187-3p	chr3	28891310	28891327	+	chr3	+	28992388	28992405
miRNA	mmu-novelmiR-187-5p	chr3	28891268	28891284	+	chr3	+	28992346	28992362
premiRNA	mmu-novelmir-188	chr3	36051061	36051132	+	chr3	+	36152139	36152210
miRNA	mmu-novelmiR-188-5p	chr3	36051061	36051085	+	chr3	+	36152139	36152163
miRNA	mmu-novelmiR-188-3p	chr3	36051113	36051132	+	chr3	+	36152191	36152210
premiRNA	mmu-novelmir-189	chr3	41367316	41367391	+	chr3	+	41563394	41563469
miRNA	mmu-novelmiR-189-3p	chr3	41367371	41367391	+	chr3	+	41563449	41563469
miRNA	mmu-novelmiR-189-5p	chr3	41367316	41367338	+	chr3	+	41563394	41563416
premiRNA	mmu-novelmir-190	chr3	50169481	50169570	-	chr3	-	50365559	50365648
miRNA	mmu-novelmiR-190-5p	chr3	50169546	50169570	-	chr3	-	50365624	50365648
miRNA	mmu-novelmiR-190-3p	chr3	50169481	50169505	-	chr3	-	50365559	50365583
premiRNA	mmu-novelmir-191	chr3	51323531	51323588	-	chr3	-	51519609	51519666
miRNA	mmu-novelmiR-191-5p	chr3	51323567	51323588	-	chr3	-	51519645	51519666
miRNA	mmu-novelmiR-191-3p	chr3	51323531	51323553	-	chr3	-	51519609	51519631
premiRNA	mmu-novelmir-192	chr3	55691206	55691261	-	chr3	-	55887284	55887339
miRNA	mmu-novelmiR-192-3p	chr3	55691206	55691227	-	chr3	-	55887284	55887305
miRNA	mmu-novelmiR-192-5p	chr3	55691240	55691261	-	chr3	-	55887318	55887339
premiRNA	mmu-novelmir-193	chr3	61166826	61166902	-	chr3	-	61362904	61362980
miRNA	mmu-novelmiR-193-3p	chr3	61166826	61166846	-	chr3	-	61362904	61362924
miRNA	mmu-novelmiR-193-5p	chr3	61166883	61166902	-	chr3	-	61362961	61362980
premiRNA	mmu-novelmir-194	chr3	68296781	68296829	-	chr3	-	68492859	68492907
miRNA	mmu-novelmiR-194-5p	chr3	68296806	68296829	-	chr3	-	68492884	68492907
miRNA	mmu-novelmiR-194-3p	chr3	68296781	68296804	-	chr3	-	68492859	68492882
premiRNA	mmu-novelmir-195	chr3	68889103	68889169	-	chr3	-	69085181	69085247
miRNA	mmu-novelmiR-195-5p	chr3	68889149	68889169	-	chr3	-	69085227	69085247
miRNA	mmu-novelmiR-195-3p	chr3	68889103	68889121	-	chr3	-	69085181	69085199
premiRNA	mmu-novelmir-196	chr3	69138897	69138976	+	chr3	+	69334975	69335054
miRNA	mmu-novelmiR-196-5p	chr3	69138897	69138919	+	chr3	+	69334975	69334997
miRNA	mmu-novelmiR-196-3p	chr3	69138953	69138976	+	chr3	+	69335031	69335054
premiRNA	mmu-novelmir-197	chr3	69397475	69397538	-	chr3	-	69593553	69593616
miRNA	mmu-novelmiR-197-5p	chr3	69397516	69397538	-	chr3	-	69593594	69593616
miRNA	mmu-novelmiR-197-3p	chr3	69397475	69397493	-	chr3	-	69593553	69593571
premiRNA	mmu-novelmir-198	chr3	79646135	79646210	-	chr3	-	79842213	79842288
miRNA	mmu-novelmiR-198-3p	chr3	79646135	79646152	-	chr3	-	79842213	79842230
miRNA	mmu-novelmiR-198-5p	chr3	79646191	79646210	-	chr3	-	79842269	79842288
premiRNA	mmu-novelmir-199	chr3	80496150	80496208	-	chr3	-	80692228	80692286
miRNA	mmu-novelmiR-199-3p	chr3	80496150	80496171	-	chr3	-	80692228	80692249
miRNA	mmu-novelmiR-199-5p	chr3	80496187	80496208	-	chr3	-	80692265	80692286
premiRNA	mmu-novelmir-200	chr3	84619674	84619744	+	chr3	+	84815752	84815822
miRNA	mmu-novelmiR-200-5p	chr3	84619674	84619691	+	chr3	+	84815752	84815769
miRNA	mmu-novelmiR-200-3p	chr3	84619727	84619744	+	chr3	+	84815805	84815822
premiRNA	mmu-novelmir-201	chr3	86969170	86969222	+	chr3	+	87165248	87165300
miRNA	mmu-novelmiR-201-3p	chr3	86969200	86969222	+	chr3	+	87165278	87165300
miRNA	mmu-novelmiR-201-5p	chr3	86969170	86969191	+	chr3	+	87165248	87165269
premiRNA	mmu-novelmir-202	chr3	87560096	87560180	-	chr3	-	87756174	87756258
miRNA	mmu-novelmiR-202-3p	chr3	87560096	87560114	-	chr3	-	87756174	87756192
miRNA	mmu-novelmiR-202-5p	chr3	87560163	87560180	-	chr3	-	87756241	87756258
premiRNA	mmu-novelmir-203	chr3	88019535	88019592	-	chr3	-	88215613	88215670
miRNA	mmu-novelmiR-203-5p	chr3	88019572	88019592	-	chr3	-	88215650	88215670
miRNA	mmu-novelmiR-203-3p	chr3	88019535	88019555	-	chr3	-	88215613	88215633
premiRNA	mmu-novelmir-204	chr3	88019908	88019961	+	chr3	+	88215986	88216039
miRNA	mmu-novelmiR-204-5p	chr3	88019908	88019929	+	chr3	+	88215986	88216007
miRNA	mmu-novelmiR-204-3p	chr3	88019941	88019961	+	chr3	+	88216019	88216039
premiRNA	mmu-novelmir-205	chr3	88340504	88340565	-	chr3	-	88536582	88536643
miRNA	mmu-novelmiR-205-3p	chr3	88340504	88340527	-	chr3	-	88536582	88536605
miRNA	mmu-novelmiR-205-5p	chr3	88340544	88340565	-	chr3	-	88536622	88536643
premiRNA	mmu-novelmir-206	chr3	88523508	88523555	+	chr3	+	88719586	88719633
miRNA	mmu-novelmiR-206-5p	chr3	88523508	88523530	+	chr3	+	88719586	88719608
miRNA	mmu-novelmiR-206-3p	chr3	88523535	88523555	+	chr3	+	88719613	88719633
premiRNA	mmu-novelmir-207	chr3	88712830	88712887	+	chr3	+	88908908	88908965
miRNA	mmu-novelmiR-207-3p	chr3	88712866	88712887	+	chr3	+	88908944	88908965
miRNA	mmu-novelmiR-207-5p	chr3	88712830	88712853	+	chr3	+	88908908	88908931
premiRNA	mmu-novelmir-208	chr3	88898313	88898394	-	chr3	-	89094391	89094472
miRNA	mmu-novelmiR-208-3p	chr3	88898313	88898332	-	chr3	-	89094391	89094410
miRNA	mmu-novelmiR-208-5p	chr3	88898372	88898394	-	chr3	-	89094450	89094472
premiRNA	mmu-novelmir-209	chr3	89044472	89044534	-	chr3	-	89240550	89240612
miRNA	mmu-novelmiR-209-3p	chr3	89044472	89044492	-	chr3	-	89240550	89240570
miRNA	mmu-novelmiR-209-5p	chr3	89044510	89044534	-	chr3	-	89240588	89240612
premiRNA	mmu-novelmir-210	chr3	89531150	89531197	+	chr3	+	89727228	89727275
miRNA	mmu-novelmiR-210-3p	chr3	89531177	89531197	+	chr3	+	89727255	89727275
miRNA	mmu-novelmiR-210-5p	chr3	89531150	89531171	+	chr3	+	89727228	89727249
premiRNA	mmu-novelmir-211	chr3	89548472	89548527	+	chr3	+	89744550	89744605
miRNA	mmu-novelmiR-211-3p	chr3	89548503	89548527	+	chr3	+	89744581	89744605
miRNA	mmu-novelmiR-211-5p	chr3	89548472	89548496	+	chr3	+	89744550	89744574
premiRNA	mmu-novelmir-212	chr3	90015292	90015343	-	chr3	-	90211370	90211421
miRNA	mmu-novelmiR-212-3p	chr3	90015292	90015316	-	chr3	-	90211370	90211394
miRNA	mmu-novelmiR-212-5p	chr3	90015319	90015343	-	chr3	-	90211397	90211421
premiRNA	mmu-novelmir-213	chr3	90073265	90073331	+	chr3	+	90269343	90269409
miRNA	mmu-novelmiR-213-3p	chr3	90073310	90073331	+	chr3	+	90269388	90269409
miRNA	mmu-novelmiR-213-5p	chr3	90073265	90073287	+	chr3	+	90269343	90269365
premiRNA	mmu-novelmir-214	chr3	93324867	93324907	-	chr3	-	93520945	93520985
miRNA	mmu-novelmiR-214-3p	chr3	93324867	93324884	-	chr3	-	93520945	93520962
miRNA	mmu-novelmiR-214-5p	chr3	93324886	93324907	-	chr3	-	93520964	93520985
premiRNA	mmu-novelmir-215	chr3	94790077	94790134	+	chr3	+	94986155	94986212
miRNA	mmu-novelmiR-215-5p	chr3	94790077	94790100	+	chr3	+	94986155	94986178
miRNA	mmu-novelmiR-215-3p	chr3	94790113	94790134	+	chr3	+	94986191	94986212
premiRNA	mmu-novelmir-216	chr3	94943893	94943960	-	chr3	-	95139971	95140038
miRNA	mmu-novelmiR-216-3p	chr3	94943893	94943917	-	chr3	-	95139971	95139995
miRNA	mmu-novelmiR-216-5p	chr3	94943937	94943960	-	chr3	-	95140015	95140038
premiRNA	mmu-novelmir-217	chr3	95454209	95454285	-	chr3	-	95650287	95650363
miRNA	mmu-novelmiR-217-3p	chr3	95454209	95454227	-	chr3	-	95650287	95650305
miRNA	mmu-novelmiR-217-5p	chr3	95454271	95454285	-	chr3	-	95650349	95650363
premiRNA	mmu-novelmir-218	chr3	95626242	95626307	+	chr3	+	95822319	95822384
miRNA	mmu-novelmiR-218-5p	chr3	95626242	95626262	+	chr3	+	95822319	95822339
miRNA	mmu-novelmiR-218-3p	chr3	95626282	95626307	+	chr3	+	95822359	95822384
premiRNA	mmu-novelmir-219	chr3	96052770	96052828	+	chr3	+	96248847	96248905
miRNA	mmu-novelmiR-219-3p	chr3	96052808	96052828	+	chr3	+	96248885	96248905
miRNA	mmu-novelmiR-219-5p	chr3	96052770	96052791	+	chr3	+	96248847	96248868
premiRNA	mmu-novelmir-220	chr3	96528188	96528253	-	chr3	-	96724265	96724330
miRNA	mmu-novelmiR-220-3p	chr3	96528188	96528211	-	chr3	-	96724265	96724288
miRNA	mmu-novelmiR-220-5p	chr3	96528231	96528253	-	chr3	-	96724308	96724330
premiRNA	mmu-novelmir-221	chr3	96941572	96941660	-	chr3	-	97137649	97137737
miRNA	mmu-novelmiR-221-3p	chr3	96941572	96941591	-	chr3	-	97137649	97137668
miRNA	mmu-novelmiR-221-5p	chr3	96941637	96941660	-	chr3	-	97137714	97137737
premiRNA	mmu-novelmir-222	chr3	100729193	100729265	+	chr3	+	100925270	100925342
miRNA	mmu-novelmiR-222-3p	chr3	100729247	100729265	+	chr3	+	100925324	100925342
miRNA	mmu-novelmiR-222-5p	chr3	100729193	100729212	+	chr3	+	100925270	100925289
premiRNA	mmu-novelmir-223	chr3	100750654	100750713	-	chr3	-	100946731	100946790
miRNA	mmu-novelmiR-223-5p	chr3	100750693	100750713	-	chr3	-	100946770	100946790
miRNA	mmu-novelmiR-223-3p	chr3	100750654	100750677	-	chr3	-	100946731	100946754
premiRNA	mmu-novelmir-224	chr3	101968576	101968621	-	chr3	-	102164653	102164698
miRNA	mmu-novelmiR-224-5p	chr3	101968600	101968621	-	chr3	-	102164677	102164698
miRNA	mmu-novelmiR-224-3p	chr3	101968576	101968597	-	chr3	-	102164653	102164674
premiRNA	mmu-novelmir-225	chr3	103661541	103661592	+	chr3	+	103857618	103857669
miRNA	mmu-novelmiR-225-3p	chr3	103661569	103661592	+	chr3	+	103857646	103857669
miRNA	mmu-novelmiR-225-5p	chr3	103661541	103661561	+	chr3	+	103857618	103857638
premiRNA	mmu-novelmir-226	chr3	116370512	116370580	-	chr3	-	116667594	116667662
miRNA	mmu-novelmiR-226-3p	chr3	116370512	116370535	-	chr3	-	116667594	116667617
miRNA	mmu-novelmiR-226-5p	chr3	116370557	116370580	-	chr3	-	116667639	116667662
premiRNA	mmu-novelmir-227	chr3	116407728	116407770	-	chr3	-	116704810	116704852
miRNA	mmu-novelmiR-227-3p	chr3	116407728	116407748	-	chr3	-	116704810	116704830
miRNA	mmu-novelmiR-227-5p	chr3	116407749	116407770	-	chr3	-	116704831	116704852
premiRNA	mmu-novelmir-228	chr3	116588616	116588672	+	chr3	+	116885698	116885754
miRNA	mmu-novelmiR-228-5p	chr3	116588616	116588635	+	chr3	+	116885698	116885717
miRNA	mmu-novelmiR-228-3p	chr3	116588652	116588672	+	chr3	+	116885734	116885754
premiRNA	mmu-novelmir-229	chr3	119807689	119807752	-	chr3	-	120104771	120104834
miRNA	mmu-novelmiR-229-3p	chr3	119807689	119807707	-	chr3	-	120104771	120104789
miRNA	mmu-novelmiR-229-5p	chr3	119807733	119807752	-	chr3	-	120104815	120104834
premiRNA	mmu-novelmir-230	chr3	121160901	121160975	+	chr3	+	121457983	121458057
miRNA	mmu-novelmiR-230-3p	chr3	121160952	121160975	+	chr3	+	121458034	121458057
miRNA	mmu-novelmiR-230-5p	chr3	121160901	121160924	+	chr3	+	121457983	121458006
premiRNA	mmu-novelmir-231	chr3	121473620	121473679	-	chr3	-	121770702	121770761
miRNA	mmu-novelmiR-231-3p	chr3	121473620	121473641	-	chr3	-	121770702	121770723
miRNA	mmu-novelmiR-231-5p	chr3	121473659	121473679	-	chr3	-	121770741	121770761
premiRNA	mmu-novelmir-232	chr3	126755701	126755782	-	chr3	-	127052783	127052864
miRNA	mmu-novelmiR-232-5p	chr3	126755761	126755782	-	chr3	-	127052843	127052864
miRNA	mmu-novelmiR-232-3p	chr3	126755701	126755724	-	chr3	-	127052783	127052806
premiRNA	mmu-novelmir-233	chr3	132362960	132363006	+	chr3	+	132699996	132700042
miRNA	mmu-novelmiR-233-5p	chr3	132362960	132362980	+	chr3	+	132699996	132700016
miRNA	mmu-novelmiR-233-3p	chr3	132362986	132363006	+	chr3	+	132700022	132700042
premiRNA	mmu-novelmir-234	chr3	132491844	132491907	+	chr3	+	132828880	132828943
miRNA	mmu-novelmiR-234-3p	chr3	132491890	132491907	+	chr3	+	132828926	132828943
miRNA	mmu-novelmiR-234-5p	chr3	132491844	132491862	+	chr3	+	132828880	132828898
premiRNA	mmu-novelmir-235	chr3	134544803	134544868	-	chr3	-	134881839	134881904
miRNA	mmu-novelmiR-235-3p	chr3	134544803	134544822	-	chr3	-	134881839	134881858
miRNA	mmu-novelmiR-235-5p	chr3	134544848	134544868	-	chr3	-	134881884	134881904
premiRNA	mmu-novelmir-236	chr3	134945759	134945827	+	chr3	+	135282795	135282863
miRNA	mmu-novelmiR-236-5p	chr3	134945759	134945779	+	chr3	+	135282795	135282815
miRNA	mmu-novelmiR-236-3p	chr3	134945811	134945827	+	chr3	+	135282847	135282863
premiRNA	mmu-novelmir-237	chr3	138653944	138654032	-	chr3	-	138990980	138991068
miRNA	mmu-novelmiR-237-5p	chr3	138654011	138654032	-	chr3	-	138991047	138991068
miRNA	mmu-novelmiR-237-3p	chr3	138653944	138653965	-	chr3	-	138990980	138991001
premiRNA	mmu-novelmir-238	chr3	141272716	141272779	+	chr3	+	141609752	141609815
miRNA	mmu-novelmiR-238-3p	chr3	141272762	141272779	+	chr3	+	141609798	141609815
miRNA	mmu-novelmiR-238-5p	chr3	141272716	141272734	+	chr3	+	141609752	141609770
premiRNA	mmu-novelmir-239	chr3	141594481	141594542	-	chr3	-	141931517	141931578
miRNA	mmu-novelmiR-239-3p	chr3	141594481	141594503	-	chr3	-	141931517	141931539
miRNA	mmu-novelmiR-239-5p	chr3	141594516	141594542	-	chr3	-	141931552	141931578
premiRNA	mmu-novelmir-240	chr3	144348954	144348995	-	chr3	-	144685990	144686031
miRNA	mmu-novelmiR-240-3p	chr3	144348954	144348972	-	chr3	-	144685990	144686008
miRNA	mmu-novelmiR-240-5p	chr3	144348977	144348995	-	chr3	-	144686013	144686031
premiRNA	mmu-novelmir-241	chr3	145421613	145421674	-	chr3	-	145758649	145758710
miRNA	mmu-novelmiR-241-3p	chr3	145421613	145421635	-	chr3	-	145758649	145758671
miRNA	mmu-novelmiR-241-5p	chr3	145421652	145421674	-	chr3	-	145758688	145758710
premiRNA	mmu-novelmir-242	chr3	145421618	145421678	+	chr3	+	145758654	145758714
miRNA	mmu-novelmiR-242-5p	chr3	145421618	145421637	+	chr3	+	145758654	145758673
miRNA	mmu-novelmiR-242-3p	chr3	145421656	145421678	+	chr3	+	145758692	145758714
premiRNA	mmu-novelmir-243	chr3	157560153	157560217	-	chr3	-	157897189	157897253
miRNA	mmu-novelmiR-243-5p	chr3	157560193	157560217	-	chr3	-	157897229	157897253
miRNA	mmu-novelmiR-243-3p	chr3	157560153	157560179	-	chr3	-	157897189	157897215
premiRNA	mmu-novelmir-244	chr4	4707343	4707406	-	chr4	-	4780196	4780259
miRNA	mmu-novelmiR-244-3p	chr4	4707343	4707364	-	chr4	-	4780196	4780217
miRNA	mmu-novelmiR-244-5p	chr4	4707384	4707406	-	chr4	-	4780237	4780259
premiRNA	mmu-novelmir-245	chr4	8750956	8751021	+	chr4	+	8823809	8823874
miRNA	mmu-novelmiR-245-3p	chr4	8751001	8751021	+	chr4	+	8823854	8823874
miRNA	mmu-novelmiR-245-5p	chr4	8750956	8750974	+	chr4	+	8823809	8823827
premiRNA	mmu-novelmir-246	chr4	8760881	8760939	+	chr4	+	8833734	8833792
miRNA	mmu-novelmiR-246-3p	chr4	8760915	8760939	+	chr4	+	8833768	8833792
miRNA	mmu-novelmiR-246-5p	chr4	8760881	8760903	+	chr4	+	8833734	8833756
premiRNA	mmu-novelmir-247	chr4	15940737	15940801	-	chr4	-	16013590	16013654
miRNA	mmu-novelmiR-247-3p	chr4	15940737	15940759	-	chr4	-	16013590	16013612
miRNA	mmu-novelmiR-247-5p	chr4	15940777	15940801	-	chr4	-	16013630	16013654
premiRNA	mmu-novelmir-248	chr4	21652180	21652235	-	chr4	-	21725033	21725088
miRNA	mmu-novelmiR-248-5p	chr4	21652215	21652235	-	chr4	-	21725068	21725088
miRNA	mmu-novelmiR-248-3p	chr4	21652180	21652201	-	chr4	-	21725033	21725054
premiRNA	mmu-novelmir-249	chr4	25726938	25727005	+	chr4	+	25799791	25799858
miRNA	mmu-novelmiR-249-5p	chr4	25726938	25726960	+	chr4	+	25799791	25799813
miRNA	mmu-novelmiR-249-3p	chr4	25726982	25727005	+	chr4	+	25799835	25799858
premiRNA	mmu-novelmir-250	chr4	25726942	25726995	-	chr4	-	25799795	25799848
miRNA	mmu-novelmiR-250-3p	chr4	25726942	25726962	-	chr4	-	25799795	25799815
miRNA	mmu-novelmiR-250-5p	chr4	25726975	25726995	-	chr4	-	25799828	25799848
premiRNA	mmu-novelmir-251	chr4	32425169	32425241	+	chr4	+	32338194	32338266
miRNA	mmu-novelmiR-251-5p	chr4	32425169	32425186	+	chr4	+	32338194	32338211
miRNA	mmu-novelmiR-251-3p	chr4	32425224	32425241	+	chr4	+	32338249	32338266
premiRNA	mmu-novelmir-252	chr4	32568935	32569010	+	chr4	+	32481960	32482035
miRNA	mmu-novelmiR-252-3p	chr4	32568991	32569010	+	chr4	+	32482016	32482035
miRNA	mmu-novelmiR-252-5p	chr4	32568935	32568954	+	chr4	+	32481960	32481979
premiRNA	mmu-novelmir-253	chr4	33118866	33118912	-	chr4	-	33031891	33031937
miRNA	mmu-novelmiR-253-3p	chr4	33118866	33118884	-	chr4	-	33031891	33031909
miRNA	mmu-novelmiR-253-5p	chr4	33118895	33118912	-	chr4	-	33031920	33031937
premiRNA	mmu-novelmir-254	chr4	33332048	33332133	-	chr4	-	33245073	33245158
miRNA	mmu-novelmiR-254-5p	chr4	33332115	33332133	-	chr4	-	33245140	33245158
miRNA	mmu-novelmiR-254-3p	chr4	33332048	33332066	-	chr4	-	33245073	33245091
premiRNA	mmu-novelmir-255	chr4	34580118	34580208	+	chr4	+	34632869	34632959
miRNA	mmu-novelmiR-255-3p	chr4	34580184	34580208	+	chr4	+	34632935	34632959
miRNA	mmu-novelmiR-255-5p	chr4	34580118	34580144	+	chr4	+	34632869	34632895
premiRNA	mmu-novelmir-256	chr4	41087203	41087264	+	chr4	+	41140170	41140231
miRNA	mmu-novelmiR-256-3p	chr4	41087244	41087264	+	chr4	+	41140211	41140231
miRNA	mmu-novelmiR-256-5p	chr4	41087203	41087225	+	chr4	+	41140170	41140192
premiRNA	mmu-novelmir-257	chr4	42097209	42097261	+	chr4	+	42226486	42226538
miRNA	mmu-novelmiR-257-5p	chr4	42097209	42097228	+	chr4	+	42226486	42226505
miRNA	mmu-novelmiR-257-3p	chr4	42097239	42097261	+	chr4	+	42226516	42226538
premiRNA	mmu-novelmir-258	chr4	43548449	43548533	-	chr4	-	43535577	43535661
miRNA	mmu-novelmiR-258-3p	chr4	43548449	43548471	-	chr4	-	43535577	43535599
miRNA	mmu-novelmiR-258-5p	chr4	43548512	43548533	-	chr4	-	43535640	43535661
premiRNA	mmu-novelmir-259	chr4	44323991	44324055	+	chr4	+	44311119	44311183
miRNA	mmu-novelmiR-259-5p	chr4	44323991	44324013	+	chr4	+	44311119	44311141
miRNA	mmu-novelmiR-259-3p	chr4	44324035	44324055	+	chr4	+	44311163	44311183
premiRNA	mmu-novelmir-260	chr4	44959158	44959214	+	chr4	+	44946286	44946342
miRNA	mmu-novelmiR-260-5p	chr4	44959158	44959175	+	chr4	+	44946286	44946303
miRNA	mmu-novelmiR-260-3p	chr4	44959199	44959214	+	chr4	+	44946327	44946342
premiRNA	mmu-novelmir-261	chr4	46078321	46078377	+	chr4	+	46065449	46065505
miRNA	mmu-novelmiR-261-5p	chr4	46078321	46078342	+	chr4	+	46065449	46065470
miRNA	mmu-novelmiR-261-3p	chr4	46078358	46078377	+	chr4	+	46065486	46065505
premiRNA	mmu-novelmir-262	chr4	46183008	46183075	+	chr4	+	46170136	46170203
miRNA	mmu-novelmiR-262-3p	chr4	46183051	46183075	+	chr4	+	46170179	46170203
miRNA	mmu-novelmiR-262-5p	chr4	46183008	46183030	+	chr4	+	46170136	46170158
premiRNA	mmu-novelmir-263	chr4	46500119	46500179	+	chr4	+	46487247	46487307
miRNA	mmu-novelmiR-263-3p	chr4	46500158	46500179	+	chr4	+	46487286	46487307
miRNA	mmu-novelmiR-263-5p	chr4	46500119	46500138	+	chr4	+	46487247	46487266
premiRNA	mmu-novelmir-264	chr4	46508095	46508154	+	chr4	+	46495223	46495282
miRNA	mmu-novelmiR-264-5p	chr4	46508095	46508119	+	chr4	+	46495223	46495247
miRNA	mmu-novelmiR-264-3p	chr4	46508134	46508154	+	chr4	+	46495262	46495282
premiRNA	mmu-novelmir-265	chr4	49170203	49170275	+	chr4	+	49157331	49157403
miRNA	mmu-novelmiR-265-3p	chr4	49170253	49170275	+	chr4	+	49157381	49157403
miRNA	mmu-novelmiR-265-5p	chr4	49170203	49170225	+	chr4	+	49157331	49157353
premiRNA	mmu-novelmir-266	chr4	62173783	62173833	-	chr4	-	62512749	62512799
miRNA	mmu-novelmiR-266-3p	chr4	62173783	62173802	-	chr4	-	62512749	62512768
miRNA	mmu-novelmiR-266-5p	chr4	62173818	62173833	-	chr4	-	62512784	62512799
premiRNA	mmu-novelmir-267	chr4	66488804	66488855	+	chr4	+	66827770	66827821
miRNA	mmu-novelmiR-267-5p	chr4	66488804	66488824	+	chr4	+	66827770	66827790
miRNA	mmu-novelmiR-267-3p	chr4	66488839	66488855	+	chr4	+	66827805	66827821
premiRNA	mmu-novelmir-268	chr4	75765380	75765442	-	chr4	-	76119476	76119538
miRNA	mmu-novelmiR-268-3p	chr4	75765380	75765401	-	chr4	-	76119476	76119497
miRNA	mmu-novelmiR-268-5p	chr4	75765420	75765442	-	chr4	-	76119516	76119538
premiRNA	mmu-novelmir-269	chr4	81088579	81088668	-	chr4	-	81442675	81442764
miRNA	mmu-novelmiR-269-3p	chr4	81088579	81088599	-	chr4	-	81442675	81442695
miRNA	mmu-novelmiR-269-5p	chr4	81088646	81088668	-	chr4	-	81442742	81442764
premiRNA	mmu-novelmir-270	chr4	84530120	84530177	-	chr4	-	84884216	84884273
miRNA	mmu-novelmiR-270-3p	chr4	84530120	84530141	-	chr4	-	84884216	84884237
miRNA	mmu-novelmiR-270-5p	chr4	84530153	84530177	-	chr4	-	84884249	84884273
premiRNA	mmu-novelmir-271	chr4	86717684	86717745	-	chr4	-	87071780	87071841
miRNA	mmu-novelmiR-271-5p	chr4	86717723	86717745	-	chr4	-	87071819	87071841
miRNA	mmu-novelmiR-271-3p	chr4	86717684	86717704	-	chr4	-	87071780	87071800
premiRNA	mmu-novelmir-272	chr4	102184184	102184254	+	chr4	+	102511579	102511649
miRNA	mmu-novelmiR-272-3p	chr4	102184234	102184254	+	chr4	+	102511629	102511649
miRNA	mmu-novelmiR-272-5p	chr4	102184184	102184204	+	chr4	+	102511579	102511599
premiRNA	mmu-novelmir-273	chr4	102454233	102454291	+	chr4	+	102781628	102781686
miRNA	mmu-novelmiR-273-3p	chr4	102454270	102454291	+	chr4	+	102781665	102781686
miRNA	mmu-novelmiR-273-5p	chr4	102454233	102454256	+	chr4	+	102781628	102781651
premiRNA	mmu-novelmir-274	chr4	106019737	106019797	+	chr4	+	106347132	106347192
miRNA	mmu-novelmiR-274-5p	chr4	106019737	106019759	+	chr4	+	106347132	106347154
miRNA	mmu-novelmiR-274-3p	chr4	106019776	106019797	+	chr4	+	106347171	106347192
premiRNA	mmu-novelmir-275	chr4	106599234	106599293	+	chr4	+	106926629	106926688
miRNA	mmu-novelmiR-275-5p	chr4	106599234	106599254	+	chr4	+	106926629	106926649
miRNA	mmu-novelmiR-275-3p	chr4	106599269	106599293	+	chr4	+	106926664	106926688
premiRNA	mmu-novelmir-276	chr4	107088142	107088215	+	chr4	+	107415537	107415610
miRNA	mmu-novelmiR-276-3p	chr4	107088194	107088215	+	chr4	+	107415589	107415610
miRNA	mmu-novelmiR-276-5p	chr4	107088142	107088164	+	chr4	+	107415537	107415559
premiRNA	mmu-novelmir-277	chr4	107704404	107704480	-	chr4	-	108031799	108031875
miRNA	mmu-novelmiR-277-3p	chr4	107704404	107704427	-	chr4	-	108031799	108031822
miRNA	mmu-novelmiR-277-5p	chr4	107704462	107704480	-	chr4	-	108031857	108031875
premiRNA	mmu-novelmir-278	chr4	109013997	109014073	+	chr4	+	109341392	109341468
miRNA	mmu-novelmiR-278-5p	chr4	109013997	109014018	+	chr4	+	109341392	109341413
miRNA	mmu-novelmiR-278-3p	chr4	109014050	109014073	+	chr4	+	109341445	109341468
premiRNA	mmu-novelmir-279	chr4	109657965	109658019	+	chr4	+	109985360	109985414
miRNA	mmu-novelmiR-279-5p	chr4	109657965	109657986	+	chr4	+	109985360	109985381
miRNA	mmu-novelmiR-279-3p	chr4	109658002	109658019	+	chr4	+	109985397	109985414
premiRNA	mmu-novelmir-280	chr4	115432450	115432523	+	chr4	+	115759845	115759918
miRNA	mmu-novelmiR-280-3p	chr4	115432499	115432523	+	chr4	+	115759894	115759918
miRNA	mmu-novelmiR-280-5p	chr4	115432450	115432476	+	chr4	+	115759845	115759871
premiRNA	mmu-novelmir-281	chr4	115532601	115532658	+	chr4	+	115859996	115860053
miRNA	mmu-novelmiR-281-5p	chr4	115532601	115532625	+	chr4	+	115859996	115860020
miRNA	mmu-novelmiR-281-3p	chr4	115532637	115532658	+	chr4	+	115860032	115860053
premiRNA	mmu-novelmir-282	chr4	116669635	116669702	+	chr4	+	116997030	116997097
miRNA	mmu-novelmiR-282-5p	chr4	116669635	116669656	+	chr4	+	116997030	116997051
miRNA	mmu-novelmiR-282-3p	chr4	116669679	116669702	+	chr4	+	116997074	116997097
premiRNA	mmu-novelmir-283	chr4	117319420	117319481	+	chr4	+	117646815	117646876
miRNA	mmu-novelmiR-283-3p	chr4	117319459	117319481	+	chr4	+	117646854	117646876
miRNA	mmu-novelmiR-283-5p	chr4	117319420	117319441	+	chr4	+	117646815	117646836
premiRNA	mmu-novelmir-284	chr4	118109255	118109316	-	chr4	-	118436650	118436711
miRNA	mmu-novelmiR-284-3p	chr4	118109255	118109278	-	chr4	-	118436650	118436673
miRNA	mmu-novelmiR-284-5p	chr4	118109294	118109316	-	chr4	-	118436689	118436711
premiRNA	mmu-novelmir-285	chr4	118294771	118294848	+	chr4	+	118622166	118622243
miRNA	mmu-novelmiR-285-5p	chr4	118294771	118294792	+	chr4	+	118622166	118622187
miRNA	mmu-novelmiR-285-3p	chr4	118294831	118294848	+	chr4	+	118622226	118622243
premiRNA	mmu-novelmir-286	chr4	120676695	120676773	-	chr4	-	121004090	121004168
miRNA	mmu-novelmiR-286-3p	chr4	120676695	120676716	-	chr4	-	121004090	121004111
miRNA	mmu-novelmiR-286-5p	chr4	120676752	120676773	-	chr4	-	121004147	121004168
premiRNA	mmu-novelmir-287	chr4	120676697	120676775	+	chr4	+	121004092	121004170
miRNA	mmu-novelmiR-287-3p	chr4	120676754	120676775	+	chr4	+	121004149	121004170
miRNA	mmu-novelmiR-287-5p	chr4	120676697	120676718	+	chr4	+	121004092	121004113
premiRNA	mmu-novelmir-288	chr4	124251409	124251465	-	chr4	-	124574166	124574222
miRNA	mmu-novelmiR-288-5p	chr4	124251442	124251465	-	chr4	-	124574199	124574222
miRNA	mmu-novelmiR-288-3p	chr4	124251409	124251431	-	chr4	-	124574166	124574188
premiRNA	mmu-novelmir-289	chr4	124528118	124528184	+	chr4	+	124850874	124850940
miRNA	mmu-novelmiR-289-3p	chr4	124528166	124528184	+	chr4	+	124850922	124850940
miRNA	mmu-novelmiR-289-5p	chr4	124528118	124528135	+	chr4	+	124850874	124850891
premiRNA	mmu-novelmir-290	chr4	124896249	124896311	-	chr4	-	125219005	125219067
miRNA	mmu-novelmiR-290-3p	chr4	124896249	124896271	-	chr4	-	125219005	125219027
miRNA	mmu-novelmiR-290-5p	chr4	124896288	124896311	-	chr4	-	125219044	125219067
premiRNA	mmu-novelmir-291	chr4	125320669	125320742	-	chr4	-	125643425	125643498
miRNA	mmu-novelmiR-291-5p	chr4	125320723	125320742	-	chr4	-	125643479	125643498
miRNA	mmu-novelmiR-291-3p	chr4	125320669	125320688	-	chr4	-	125643425	125643444
premiRNA	mmu-novelmir-292	chr4	125780684	125780751	+	chr4	+	126103440	126103507
miRNA	mmu-novelmiR-292-5p	chr4	125780684	125780703	+	chr4	+	126103440	126103459
miRNA	mmu-novelmiR-292-3p	chr4	125780733	125780751	+	chr4	+	126103489	126103507
premiRNA	mmu-novelmir-293	chr4	126603037	126603095	-	chr4	-	126925793	126925851
miRNA	mmu-novelmiR-293-5p	chr4	126603071	126603095	-	chr4	-	126925827	126925851
miRNA	mmu-novelmiR-293-3p	chr4	126603037	126603058	-	chr4	-	126925793	126925814
premiRNA	mmu-novelmir-294	chr4	126913740	126913804	+	chr4	+	127236496	127236560
miRNA	mmu-novelmiR-294-5p	chr4	126913740	126913762	+	chr4	+	127236496	127236518
miRNA	mmu-novelmiR-294-3p	chr4	126913782	126913804	+	chr4	+	127236538	127236560
premiRNA	mmu-novelmir-295	chr4	127982906	127982967	+	chr4	+	128305662	128305723
miRNA	mmu-novelmiR-295-3p	chr4	127982947	127982967	+	chr4	+	128305703	128305723
miRNA	mmu-novelmiR-295-5p	chr4	127982906	127982926	+	chr4	+	128305662	128305682
premiRNA	mmu-novelmir-296	chr4	129029753	129029802	-	chr4	-	129352509	129352558
miRNA	mmu-novelmiR-296-5p	chr4	129029785	129029802	-	chr4	-	129352541	129352558
miRNA	mmu-novelmiR-296-3p	chr4	129029753	129029771	-	chr4	-	129352509	129352527
premiRNA	mmu-novelmir-297	chr4	129285474	129285551	+	chr4	+	129608230	129608307
miRNA	mmu-novelmiR-297-5p	chr4	129285474	129285492	+	chr4	+	129608230	129608248
miRNA	mmu-novelmiR-297-3p	chr4	129285534	129285551	+	chr4	+	129608290	129608307
premiRNA	mmu-novelmir-298	chr4	129307174	129307229	-	chr4	-	129629930	129629985
miRNA	mmu-novelmiR-298-3p	chr4	129307174	129307196	-	chr4	-	129629930	129629952
miRNA	mmu-novelmiR-298-5p	chr4	129307207	129307229	-	chr4	-	129629963	129629985
premiRNA	mmu-novelmir-299	chr4	129730528	129730604	+	chr4	+	130053284	130053360
miRNA	mmu-novelmiR-299-5p	chr4	129730528	129730551	+	chr4	+	130053284	130053307
miRNA	mmu-novelmiR-299-3p	chr4	129730582	129730604	+	chr4	+	130053338	130053360
premiRNA	mmu-novelmir-300	chr4	129748711	129748789	+	chr4	+	130071467	130071545
miRNA	mmu-novelmiR-300-5p	chr4	129748711	129748733	+	chr4	+	130071467	130071489
miRNA	mmu-novelmiR-300-3p	chr4	129748768	129748789	+	chr4	+	130071524	130071545
premiRNA	mmu-novelmir-301	chr4	132338396	132338448	-	chr4	-	132782481	132782533
miRNA	mmu-novelmiR-301-3p	chr4	132338396	132338417	-	chr4	-	132782481	132782502
miRNA	mmu-novelmiR-301-5p	chr4	132338430	132338448	-	chr4	-	132782515	132782533
premiRNA	mmu-novelmir-302	chr4	133442430	133442489	+	chr4	+	133886515	133886574
miRNA	mmu-novelmiR-302-3p	chr4	133442468	133442489	+	chr4	+	133886553	133886574
miRNA	mmu-novelmiR-302-5p	chr4	133442430	133442450	+	chr4	+	133886515	133886535
premiRNA	mmu-novelmir-303	chr4	133537872	133537930	-	chr4	-	133981957	133982015
miRNA	mmu-novelmiR-303-5p	chr4	133537911	133537930	-	chr4	-	133981996	133982015
miRNA	mmu-novelmiR-303-3p	chr4	133537872	133537892	-	chr4	-	133981957	133981977
premiRNA	mmu-novelmir-304	chr4	133685604	133685663	+	chr4	+	134129689	134129748
miRNA	mmu-novelmiR-304-5p	chr4	133685604	133685624	+	chr4	+	134129689	134129709
miRNA	mmu-novelmiR-304-3p	chr4	133685642	133685663	+	chr4	+	134129727	134129748
premiRNA	mmu-novelmir-305	chr4	134908681	134908731	-	chr4	-	135352766	135352816
miRNA	mmu-novelmiR-305-5p	chr4	134908710	134908731	-	chr4	-	135352795	135352816
miRNA	mmu-novelmiR-305-3p	chr4	134908681	134908701	-	chr4	-	135352766	135352786
premiRNA	mmu-novelmir-306	chr4	135700737	135700795	+	chr4	+	136144822	136144880
miRNA	mmu-novelmiR-306-3p	chr4	135700775	135700795	+	chr4	+	136144860	136144880
miRNA	mmu-novelmiR-306-5p	chr4	135700737	135700760	+	chr4	+	136144822	136144845
premiRNA	mmu-novelmir-307	chr4	136739945	136740017	-	chr4	-	137184030	137184102
miRNA	mmu-novelmiR-307-3p	chr4	136739945	136739969	-	chr4	-	137184030	137184054
miRNA	mmu-novelmiR-307-5p	chr4	136740000	136740017	-	chr4	-	137184085	137184102
premiRNA	mmu-novelmir-308	chr4	136832699	136832757	-	chr4	-	137276784	137276842
miRNA	mmu-novelmiR-308-5p	chr4	136832738	136832757	-	chr4	-	137276823	137276842
miRNA	mmu-novelmiR-308-3p	chr4	136832699	136832722	-	chr4	-	137276784	137276807
premiRNA	mmu-novelmir-309	chr4	140586201	140586260	-	chr4	-	141030286	141030345
miRNA	mmu-novelmiR-309-3p	chr4	140586201	140586222	-	chr4	-	141030286	141030307
miRNA	mmu-novelmiR-309-5p	chr4	140586239	140586260	-	chr4	-	141030324	141030345
premiRNA	mmu-novelmir-310	chr4	140602631	140602679	-	chr4	-	141046716	141046764
miRNA	mmu-novelmiR-310-3p	chr4	140602631	140602652	-	chr4	-	141046716	141046737
miRNA	mmu-novelmiR-310-5p	chr4	140602659	140602679	-	chr4	-	141046744	141046764
premiRNA	mmu-novelmir-311	chr4	140670693	140670778	-	chr4	-	141114778	141114863
miRNA	mmu-novelmiR-311-5p	chr4	140670760	140670778	-	chr4	-	141114845	141114863
miRNA	mmu-novelmiR-311-3p	chr4	140670693	140670710	-	chr4	-	141114778	141114795
premiRNA	mmu-novelmir-312	chr4	140690213	140690281	-	chr4	-	141134298	141134366
miRNA	mmu-novelmiR-312-5p	chr4	140690258	140690281	-	chr4	-	141134343	141134366
miRNA	mmu-novelmiR-312-3p	chr4	140690213	140690236	-	chr4	-	141134298	141134321
premiRNA	mmu-novelmir-313	chr4	140841367	140841434	+	chr4	+	141285452	141285519
miRNA	mmu-novelmiR-313-5p	chr4	140841367	140841390	+	chr4	+	141285452	141285475
miRNA	mmu-novelmiR-313-3p	chr4	140841413	140841434	+	chr4	+	141285498	141285519
premiRNA	mmu-novelmir-314	chr4	140885080	140885157	+	chr4	+	141329165	141329242
miRNA	mmu-novelmiR-314-5p	chr4	140885080	140885103	+	chr4	+	141329165	141329188
miRNA	mmu-novelmiR-314-3p	chr4	140885129	140885157	+	chr4	+	141329214	141329242
premiRNA	mmu-novelmir-315	chr4	147235357	147235422	+	chr4	+	147861248	147861313
miRNA	mmu-novelmiR-315-3p	chr4	147235401	147235422	+	chr4	+	147861292	147861313
miRNA	mmu-novelmiR-315-5p	chr4	147235357	147235379	+	chr4	+	147861248	147861270
premiRNA	mmu-novelmir-316	chr4	148468999	148469086	-	chr4	-	149094890	149094977
miRNA	mmu-novelmiR-316-3p	chr4	148468999	148469021	-	chr4	-	149094890	149094912
miRNA	mmu-novelmiR-316-5p	chr4	148469062	148469086	-	chr4	-	149094953	149094977
premiRNA	mmu-novelmir-317	chr4	148717597	148717662	-	chr4	-	149343488	149343553
miRNA	mmu-novelmiR-317-3p	chr4	148717597	148717618	-	chr4	-	149343488	149343509
miRNA	mmu-novelmiR-317-5p	chr4	148717638	148717662	-	chr4	-	149343529	149343553
premiRNA	mmu-novelmir-318	chr4	149622640	149622690	+	chr4	+	150248531	150248581
miRNA	mmu-novelmiR-318-3p	chr4	149622668	149622690	+	chr4	+	150248559	150248581
miRNA	mmu-novelmiR-318-5p	chr4	149622640	149622662	+	chr4	+	150248531	150248553
premiRNA	mmu-novelmir-319	chr4	151397018	151397071	+	chr4	+	152022909	152022962
miRNA	mmu-novelmiR-319-3p	chr4	151397049	151397071	+	chr4	+	152022940	152022962
miRNA	mmu-novelmiR-319-5p	chr4	151397018	151397039	+	chr4	+	152022909	152022930
premiRNA	mmu-novelmir-320	chr4	151524844	151524897	+	chr4	+	152150735	152150788
miRNA	mmu-novelmiR-320-3p	chr4	151524876	151524897	+	chr4	+	152150767	152150788
miRNA	mmu-novelmiR-320-5p	chr4	151524844	151524865	+	chr4	+	152150735	152150756
premiRNA	mmu-novelmir-321	chr4	151885847	151885930	+	chr4	+	152511738	152511821
miRNA	mmu-novelmiR-321-5p	chr4	151885847	151885868	+	chr4	+	152511738	152511759
miRNA	mmu-novelmiR-321-3p	chr4	151885885	151885906	+	chr4	+	152511776	152511797
premiRNA	mmu-novelmir-322	chr4	151885933	151886012	+	chr4	+	152511824	152511903
miRNA	mmu-novelmiR-322-3p	chr4	151885991	151886012	+	chr4	+	152511882	152511903
miRNA	mmu-novelmiR-322-5p	chr4	151885933	151885954	+	chr4	+	152511824	152511845
premiRNA	mmu-novelmir-323	chr4	154783303	154783362	-	chr4	-	155409194	155409253
miRNA	mmu-novelmiR-323-3p	chr4	154783303	154783323	-	chr4	-	155409194	155409214
miRNA	mmu-novelmiR-323-5p	chr4	154783343	154783362	-	chr4	-	155409234	155409253
premiRNA	mmu-novelmir-324	chr4	155079266	155079354	+	chr4	+	155705157	155705245
miRNA	mmu-novelmiR-324-3p	chr4	155079334	155079354	+	chr4	+	155705225	155705245
miRNA	mmu-novelmiR-324-5p	chr4	155079266	155079287	+	chr4	+	155705157	155705178
premiRNA	mmu-novelmir-325	chr4	155232915	155232971	+	chr4	+	155858806	155858862
miRNA	mmu-novelmiR-325-3p	chr4	155232952	155232971	+	chr4	+	155858843	155858862
miRNA	mmu-novelmiR-325-5p	chr4	155232915	155232938	+	chr4	+	155858806	155858829
premiRNA	mmu-novelmir-326	chr4	155268774	155268829	+	chr4	+	155894665	155894720
miRNA	mmu-novelmiR-326-3p	chr4	155268808	155268829	+	chr4	+	155894699	155894720
miRNA	mmu-novelmiR-326-5p	chr4	155268774	155268795	+	chr4	+	155894665	155894686
premiRNA	mmu-novelmir-327	chr5	17115377	17115440	-	chr5	-	17609559	17609622
miRNA	mmu-novelmiR-327-3p	chr5	17115377	17115394	-	chr5	-	17609559	17609576
miRNA	mmu-novelmiR-327-5p	chr5	17115422	17115440	-	chr5	-	17609604	17609622
premiRNA	mmu-novelmir-328	chr5	20292542	20292607	-	chr5	-	20786724	20786789
miRNA	mmu-novelmiR-328-5p	chr5	20292587	20292607	-	chr5	-	20786769	20786789
miRNA	mmu-novelmiR-328-3p	chr5	20292542	20292562	-	chr5	-	20786724	20786744
premiRNA	mmu-novelmir-329	chr5	21120035	21120090	-	chr5	-	21614217	21614272
miRNA	mmu-novelmiR-329-5p	chr5	21120073	21120090	-	chr5	-	21614255	21614272
miRNA	mmu-novelmiR-329-3p	chr5	21120035	21120054	-	chr5	-	21614217	21614236
premiRNA	mmu-novelmir-330	chr5	23216808	23216878	-	chr5	-	23710990	23711060
miRNA	mmu-novelmiR-330-5p	chr5	23216860	23216878	-	chr5	-	23711042	23711060
miRNA	mmu-novelmiR-330-3p	chr5	23216808	23216826	-	chr5	-	23710990	23711008
premiRNA	mmu-novelmir-331	chr5	23358029	23358099	+	chr5	+	23852211	23852281
miRNA	mmu-novelmiR-331-5p	chr5	23358029	23358047	+	chr5	+	23852211	23852229
miRNA	mmu-novelmiR-331-3p	chr5	23358081	23358099	+	chr5	+	23852263	23852281
premiRNA	mmu-novelmir-332	chr5	23468509	23468592	-	chr5	-	23962691	23962774
miRNA	mmu-novelmiR-332-3p	chr5	23468509	23468529	-	chr5	-	23962691	23962711
miRNA	mmu-novelmiR-332-5p	chr5	23468569	23468592	-	chr5	-	23962751	23962774
premiRNA	mmu-novelmir-333	chr5	23918063	23918130	+	chr5	+	24412245	24412312
miRNA	mmu-novelmiR-333-5p	chr5	23918063	23918084	+	chr5	+	24412245	24412266
miRNA	mmu-novelmiR-333-3p	chr5	23918106	23918130	+	chr5	+	24412288	24412312
premiRNA	mmu-novelmir-334	chr5	24155544	24155635	+	chr5	+	24649726	24649817
miRNA	mmu-novelmiR-334-3p	chr5	24155613	24155635	+	chr5	+	24649795	24649817
miRNA	mmu-novelmiR-334-5p	chr5	24155544	24155571	+	chr5	+	24649726	24649753
premiRNA	mmu-novelmir-335	chr5	28741615	28741700	+	chr5	+	28415075	28415160
miRNA	mmu-novelmiR-335-3p	chr5	28741678	28741700	+	chr5	+	28415138	28415160
miRNA	mmu-novelmiR-335-5p	chr5	28741615	28741637	+	chr5	+	28415075	28415097
premiRNA	mmu-novelmir-336	chr5	31184347	31184405	-	chr5	-	30881974	30882032
miRNA	mmu-novelmiR-336-5p	chr5	31184385	31184405	-	chr5	-	30882012	30882032
miRNA	mmu-novelmiR-336-3p	chr5	31184347	31184368	-	chr5	-	30881974	30881995
premiRNA	mmu-novelmir-337	chr5	31364605	31364679	+	chr5	+	31062232	31062306
miRNA	mmu-novelmiR-337-5p	chr5	31364605	31364625	+	chr5	+	31062232	31062252
miRNA	mmu-novelmiR-337-3p	chr5	31364661	31364679	+	chr5	+	31062288	31062306
premiRNA	mmu-novelmir-338	chr5	31375805	31375864	+	chr5	+	31073432	31073491
miRNA	mmu-novelmiR-338-3p	chr5	31375843	31375864	+	chr5	+	31073470	31073491
miRNA	mmu-novelmiR-338-5p	chr5	31375805	31375826	+	chr5	+	31073432	31073453
premiRNA	mmu-novelmir-339	chr5	31499331	31499374	+	chr5	+	31196958	31197001
miRNA	mmu-novelmiR-339-5p	chr5	31499331	31499352	+	chr5	+	31196958	31196979
miRNA	mmu-novelmiR-339-3p	chr5	31499354	31499374	+	chr5	+	31196981	31197001
premiRNA	mmu-novelmir-340	chr5	31501515	31501563	-	chr5	-	31199142	31199190
miRNA	mmu-novelmiR-340-5p	chr5	31501540	31501563	-	chr5	-	31199167	31199190
miRNA	mmu-novelmiR-340-3p	chr5	31501515	31501536	-	chr5	-	31199142	31199163
premiRNA	mmu-novelmir-341	chr5	31694539	31694623	-	chr5	-	31392166	31392250
miRNA	mmu-novelmiR-341-5p	chr5	31694603	31694623	-	chr5	-	31392230	31392250
miRNA	mmu-novelmiR-341-3p	chr5	31694539	31694558	-	chr5	-	31392166	31392185
premiRNA	mmu-novelmir-342	chr5	31904971	31905038	+	chr5	+	31602598	31602665
miRNA	mmu-novelmiR-342-3p	chr5	31905017	31905038	+	chr5	+	31602644	31602665
miRNA	mmu-novelmiR-342-5p	chr5	31904971	31904993	+	chr5	+	31602598	31602620
premiRNA	mmu-novelmir-343	chr5	31917158	31917212	+	chr5	+	31614785	31614839
miRNA	mmu-novelmiR-343-5p	chr5	31917158	31917182	+	chr5	+	31614785	31614809
miRNA	mmu-novelmiR-343-3p	chr5	31917188	31917212	+	chr5	+	31614815	31614839
premiRNA	mmu-novelmir-344	chr5	33636805	33636863	-	chr5	-	33294156	33294214
miRNA	mmu-novelmiR-344-3p	chr5	33636805	33636827	-	chr5	-	33294156	33294178
miRNA	mmu-novelmiR-344-5p	chr5	33636841	33636863	-	chr5	-	33294192	33294214
premiRNA	mmu-novelmir-345	chr5	33960740	33960802	-	chr5	-	33618091	33618153
miRNA	mmu-novelmiR-345-5p	chr5	33960780	33960802	-	chr5	-	33618131	33618153
miRNA	mmu-novelmiR-345-3p	chr5	33960740	33960761	-	chr5	-	33618091	33618112
premiRNA	mmu-novelmir-346	chr5	33983390	33983468	-	chr5	-	33640741	33640819
miRNA	mmu-novelmiR-346-3p	chr5	33983390	33983414	-	chr5	-	33640741	33640765
miRNA	mmu-novelmiR-346-5p	chr5	33983447	33983468	-	chr5	-	33640798	33640819
premiRNA	mmu-novelmir-347	chr5	34519246	34519313	-	chr5	-	34176597	34176664
miRNA	mmu-novelmiR-347-5p	chr5	34519294	34519313	-	chr5	-	34176645	34176664
miRNA	mmu-novelmiR-347-3p	chr5	34519246	34519264	-	chr5	-	34176597	34176615
premiRNA	mmu-novelmir-348	chr5	34692695	34692745	+	chr5	+	34350046	34350096
miRNA	mmu-novelmiR-348-5p	chr5	34692695	34692717	+	chr5	+	34350046	34350068
miRNA	mmu-novelmiR-348-3p	chr5	34692721	34692745	+	chr5	+	34350072	34350096
premiRNA	mmu-novelmir-349	chr5	34714650	34714708	+	chr5	+	34372001	34372059
miRNA	mmu-novelmiR-349-5p	chr5	34714650	34714670	+	chr5	+	34372001	34372021
miRNA	mmu-novelmiR-349-3p	chr5	34714687	34714708	+	chr5	+	34372038	34372059
premiRNA	mmu-novelmir-350	chr5	39063338	39063394	-	chr5	-	38672099	38672155
miRNA	mmu-novelmiR-350-5p	chr5	39063372	39063394	-	chr5	-	38672133	38672155
miRNA	mmu-novelmiR-350-3p	chr5	39063338	39063360	-	chr5	-	38672099	38672121
premiRNA	mmu-novelmir-351	chr5	42092176	42092236	-	chr5	-	41700937	41700997
miRNA	mmu-novelmiR-351-3p	chr5	42092176	42092200	-	chr5	-	41700937	41700961
miRNA	mmu-novelmiR-351-5p	chr5	42092213	42092236	-	chr5	-	41700974	41700997
premiRNA	mmu-novelmir-352	chr5	43625144	43625205	+	chr5	+	43233905	43233966
miRNA	mmu-novelmiR-352-3p	chr5	43625184	43625205	+	chr5	+	43233945	43233966
miRNA	mmu-novelmiR-352-5p	chr5	43625144	43625167	+	chr5	+	43233905	43233928
premiRNA	mmu-novelmir-353	chr5	45841824	45841864	+	chr5	+	45450585	45450625
miRNA	mmu-novelmiR-353-5p	chr5	45841824	45841841	+	chr5	+	45450585	45450602
miRNA	mmu-novelmiR-353-3p	chr5	45841847	45841864	+	chr5	+	45450608	45450625
premiRNA	mmu-novelmir-354	chr5	50952071	50952154	-	chr5	-	50560832	50560915
miRNA	mmu-novelmiR-354-3p	chr5	50952071	50952095	-	chr5	-	50560832	50560856
miRNA	mmu-novelmiR-354-5p	chr5	50952134	50952154	-	chr5	-	50560895	50560915
premiRNA	mmu-novelmir-355	chr5	53548887	53548949	-	chr5	-	53157648	53157710
miRNA	mmu-novelmiR-355-5p	chr5	53548928	53548949	-	chr5	-	53157689	53157710
miRNA	mmu-novelmiR-355-3p	chr5	53548887	53548907	-	chr5	-	53157648	53157668
premiRNA	mmu-novelmir-356	chr5	55050205	55050272	-	chr5	-	54658966	54659033
miRNA	mmu-novelmiR-356-3p	chr5	55050205	55050226	-	chr5	-	54658966	54658987
miRNA	mmu-novelmiR-356-5p	chr5	55050249	55050272	-	chr5	-	54659010	54659033
premiRNA	mmu-novelmir-357	chr5	61043312	61043375	-	chr5	-	60652073	60652136
miRNA	mmu-novelmiR-357-3p	chr5	61043312	61043330	-	chr5	-	60652073	60652091
miRNA	mmu-novelmiR-357-5p	chr5	61043356	61043375	-	chr5	-	60652117	60652136
premiRNA	mmu-novelmir-358	chr5	64702060	64702121	+	chr5	+	64310821	64310882
miRNA	mmu-novelmiR-358-5p	chr5	64702060	64702080	+	chr5	+	64310821	64310841
miRNA	mmu-novelmiR-358-3p	chr5	64702101	64702121	+	chr5	+	64310862	64310882
premiRNA	mmu-novelmir-359	chr5	66010859	66010940	-	chr5	-	65619620	65619701
miRNA	mmu-novelmiR-359-3p	chr5	66010859	66010876	-	chr5	-	65619620	65619637
miRNA	mmu-novelmiR-359-5p	chr5	66010922	66010940	-	chr5	-	65619683	65619701
premiRNA	mmu-novelmir-360	chr5	73693016	73693080	+	chr5	+	73301777	73301841
miRNA	mmu-novelmiR-360-5p	chr5	73693016	73693040	+	chr5	+	73301777	73301801
miRNA	mmu-novelmiR-360-3p	chr5	73693059	73693080	+	chr5	+	73301820	73301841
premiRNA	mmu-novelmir-361	chr5	77338837	77338901	+	chr5	+	76909812	76909876
miRNA	mmu-novelmiR-361-3p	chr5	77338879	77338901	+	chr5	+	76909854	76909876
miRNA	mmu-novelmiR-361-5p	chr5	77338837	77338860	+	chr5	+	76909812	76909835
premiRNA	mmu-novelmir-362	chr5	77513542	77513602	-	chr5	-	77084517	77084577
miRNA	mmu-novelmiR-362-5p	chr5	77513580	77513602	-	chr5	-	77084555	77084577
miRNA	mmu-novelmiR-362-3p	chr5	77513542	77513562	-	chr5	-	77084517	77084537
premiRNA	mmu-novelmir-363	chr5	79607879	79607942	+	chr5	+	79178854	79178917
miRNA	mmu-novelmiR-363-3p	chr5	79607925	79607942	+	chr5	+	79178900	79178917
miRNA	mmu-novelmiR-363-5p	chr5	79607879	79607897	+	chr5	+	79178854	79178872
premiRNA	mmu-novelmir-364	chr5	90561900	90561977	+	chr5	+	90132875	90132952
miRNA	mmu-novelmiR-364-5p	chr5	90561900	90561922	+	chr5	+	90132875	90132897
miRNA	mmu-novelmiR-364-3p	chr5	90561953	90561977	+	chr5	+	90132928	90132952
premiRNA	mmu-novelmir-365	chr5	90795356	90795395	-	chr5	-	90366330	90366369
miRNA	mmu-novelmiR-365-5p	chr5	90795378	90795395	-	chr5	-	90366352	90366369
miRNA	mmu-novelmiR-365-3p	chr5	90795356	90795374	-	chr5	-	90366330	90366348
premiRNA	mmu-novelmir-366	chr5	92483716	92483766	-	chr5	-	92054690	92054740
miRNA	mmu-novelmiR-366-3p	chr5	92483716	92483739	-	chr5	-	92054690	92054713
miRNA	mmu-novelmiR-366-5p	chr5	92483744	92483766	-	chr5	-	92054718	92054740
premiRNA	mmu-novelmir-367	chr5	92557330	92557388	-	chr5	-	92128304	92128362
miRNA	mmu-novelmiR-367-3p	chr5	92557330	92557351	-	chr5	-	92128304	92128325
miRNA	mmu-novelmiR-367-5p	chr5	92557366	92557388	-	chr5	-	92128340	92128362
premiRNA	mmu-novelmir-368	chr5	92897297	92897358	-	chr5	-	92468271	92468332
miRNA	mmu-novelmiR-368-3p	chr5	92897297	92897318	-	chr5	-	92468271	92468292
miRNA	mmu-novelmiR-368-5p	chr5	92897335	92897358	-	chr5	-	92468309	92468332
premiRNA	mmu-novelmir-369	chr5	100461699	100461778	-	chr5	-	100032680	100032759
miRNA	mmu-novelmiR-369-5p	chr5	100461759	100461778	-	chr5	-	100032740	100032759
miRNA	mmu-novelmiR-369-3p	chr5	100461699	100461720	-	chr5	-	100032680	100032701
premiRNA	mmu-novelmir-370	chr5	103389104	103389172	-	chr5	-	102960085	102960153
miRNA	mmu-novelmiR-370-5p	chr5	103389148	103389172	-	chr5	-	102960129	102960153
miRNA	mmu-novelmiR-370-3p	chr5	103389104	103389127	-	chr5	-	102960085	102960108
premiRNA	mmu-novelmir-371	chr5	105563660	105563710	-	chr5	-	105134641	105134691
miRNA	mmu-novelmiR-371-5p	chr5	105563689	105563710	-	chr5	-	105134670	105134691
miRNA	mmu-novelmiR-371-3p	chr5	105563660	105563682	-	chr5	-	105134641	105134663
premiRNA	mmu-novelmir-372	chr5	106130498	106130555	-	chr5	-	105701479	105701536
miRNA	mmu-novelmiR-372-5p	chr5	106130535	106130555	-	chr5	-	105701516	105701536
miRNA	mmu-novelmiR-372-3p	chr5	106130498	106130519	-	chr5	-	105701479	105701500
premiRNA	mmu-novelmir-373	chr5	107536124	107536172	-	chr5	-	107107105	107107153
miRNA	mmu-novelmiR-373-3p	chr5	107536124	107536148	-	chr5	-	107107105	107107129
miRNA	mmu-novelmiR-373-5p	chr5	107536149	107536172	-	chr5	-	107107130	107107153
premiRNA	mmu-novelmir-374	chr5	108297519	108297573	+	chr5	+	107868500	107868554
miRNA	mmu-novelmiR-374-3p	chr5	108297551	108297573	+	chr5	+	107868532	107868554
miRNA	mmu-novelmiR-374-5p	chr5	108297519	108297537	+	chr5	+	107868500	107868518
premiRNA	mmu-novelmir-375	chr5	108298176	108298258	-	chr5	-	107869157	107869239
miRNA	mmu-novelmiR-375-3p	chr5	108298176	108298196	-	chr5	-	107869157	107869177
miRNA	mmu-novelmiR-375-5p	chr5	108298240	108298258	-	chr5	-	107869221	107869239
premiRNA	mmu-novelmir-376	chr5	108527347	108527389	+	chr5	+	108098328	108098370
miRNA	mmu-novelmiR-376-3p	chr5	108527370	108527389	+	chr5	+	108098351	108098370
miRNA	mmu-novelmiR-376-5p	chr5	108527347	108527368	+	chr5	+	108098328	108098349
premiRNA	mmu-novelmir-377	chr5	108946390	108946474	+	chr5	+	108517371	108517455
miRNA	mmu-novelmiR-377-5p	chr5	108946390	108946407	+	chr5	+	108517371	108517388
miRNA	mmu-novelmiR-377-3p	chr5	108946457	108946474	+	chr5	+	108517438	108517455
premiRNA	mmu-novelmir-378	chr5	109028421	109028494	-	chr5	-	108599402	108599475
miRNA	mmu-novelmiR-378-5p	chr5	109028473	109028494	-	chr5	-	108599454	108599475
miRNA	mmu-novelmiR-378-3p	chr5	109028421	109028445	-	chr5	-	108599402	108599426
premiRNA	mmu-novelmir-379	chr5	110280663	110280721	+	chr5	+	109851644	109851702
miRNA	mmu-novelmiR-379-3p	chr5	110280700	110280721	+	chr5	+	109851681	109851702
miRNA	mmu-novelmiR-379-5p	chr5	110280663	110280688	+	chr5	+	109851644	109851669
premiRNA	mmu-novelmir-380	chr5	110694895	110694978	-	chr5	-	110265876	110265959
miRNA	mmu-novelmiR-380-5p	chr5	110694959	110694978	-	chr5	-	110265940	110265959
miRNA	mmu-novelmiR-380-3p	chr5	110694895	110694916	-	chr5	-	110265876	110265897
premiRNA	mmu-novelmir-381	chr5	110761561	110761633	+	chr5	+	110332542	110332614
miRNA	mmu-novelmiR-381-5p	chr5	110761561	110761578	+	chr5	+	110332542	110332559
miRNA	mmu-novelmiR-381-3p	chr5	110761615	110761633	+	chr5	+	110332596	110332614
premiRNA	mmu-novelmir-382	chr5	111270496	111270546	+	chr5	+	110841477	110841527
miRNA	mmu-novelmiR-382-5p	chr5	111270496	111270517	+	chr5	+	110841477	110841498
miRNA	mmu-novelmiR-382-3p	chr5	111270523	111270546	+	chr5	+	110841504	110841527
premiRNA	mmu-novelmir-383	chr5	114037952	114038013	-	chr5	-	113587998	113588059
miRNA	mmu-novelmiR-383-5p	chr5	114037992	114038013	-	chr5	-	113588038	113588059
miRNA	mmu-novelmiR-383-3p	chr5	114037952	114037972	-	chr5	-	113587998	113588018
premiRNA	mmu-novelmir-384	chr5	114195184	114195230	-	chr5	-	113745175	113745221
miRNA	mmu-novelmiR-384-5p	chr5	114195210	114195230	-	chr5	-	113745201	113745221
miRNA	mmu-novelmiR-384-3p	chr5	114195184	114195203	-	chr5	-	113745175	113745194
premiRNA	mmu-novelmir-385	chr5	114326527	114326620	-	chr5	-	113876518	113876611
miRNA	mmu-novelmiR-385-3p	chr5	114326527	114326551	-	chr5	-	113876518	113876542
miRNA	mmu-novelmiR-385-5p	chr5	114326593	114326620	-	chr5	-	113876584	113876611
premiRNA	mmu-novelmir-386	chr5	114894333	114894390	+	chr5	+	114444324	114444381
miRNA	mmu-novelmiR-386-3p	chr5	114894373	114894390	+	chr5	+	114444364	114444381
miRNA	mmu-novelmiR-386-5p	chr5	114894333	114894351	+	chr5	+	114444324	114444342
premiRNA	mmu-novelmir-387	chr5	115025755	115025816	+	chr5	+	114575746	114575807
miRNA	mmu-novelmiR-387-5p	chr5	115025755	115025775	+	chr5	+	114575746	114575766
miRNA	mmu-novelmiR-387-3p	chr5	115025795	115025816	+	chr5	+	114575786	114575807
premiRNA	mmu-novelmir-388	chr5	115261222	115261305	-	chr5	-	114811213	114811296
miRNA	mmu-novelmiR-388-5p	chr5	115261282	115261305	-	chr5	-	114811273	114811296
miRNA	mmu-novelmiR-388-3p	chr5	115261222	115261242	-	chr5	-	114811213	114811233
premiRNA	mmu-novelmir-389	chr5	115373377	115373443	+	chr5	+	114923368	114923434
miRNA	mmu-novelmiR-389-3p	chr5	115373422	115373443	+	chr5	+	114923413	114923434
miRNA	mmu-novelmiR-389-5p	chr5	115373377	115373395	+	chr5	+	114923368	114923386
premiRNA	mmu-novelmir-390	chr5	115397599	115397654	+	chr5	+	114947590	114947645
miRNA	mmu-novelmiR-390-3p	chr5	115397632	115397654	+	chr5	+	114947623	114947645
miRNA	mmu-novelmiR-390-5p	chr5	115397599	115397620	+	chr5	+	114947590	114947611
premiRNA	mmu-novelmir-391	chr5	115596177	115596230	-	chr5	-	115146168	115146221
miRNA	mmu-novelmiR-391-5p	chr5	115596209	115596230	-	chr5	-	115146200	115146221
miRNA	mmu-novelmiR-391-3p	chr5	115596177	115596196	-	chr5	-	115146168	115146187
premiRNA	mmu-novelmir-392	chr5	116029023	116029064	+	chr5	+	115579014	115579055
miRNA	mmu-novelmiR-392-3p	chr5	116029043	116029064	+	chr5	+	115579034	115579055
miRNA	mmu-novelmiR-392-5p	chr5	116029023	116029042	+	chr5	+	115579014	115579033
premiRNA	mmu-novelmir-393	chr5	116042013	116042073	+	chr5	+	115592004	115592064
miRNA	mmu-novelmiR-393-5p	chr5	116042013	116042035	+	chr5	+	115592004	115592026
miRNA	mmu-novelmiR-393-3p	chr5	116042053	116042073	+	chr5	+	115592044	115592064
premiRNA	mmu-novelmir-394	chr5	118459524	118459577	+	chr5	+	118009515	118009568
miRNA	mmu-novelmiR-394-5p	chr5	118459524	118459547	+	chr5	+	118009515	118009538
miRNA	mmu-novelmiR-394-3p	chr5	118459553	118459577	+	chr5	+	118009544	118009568
premiRNA	mmu-novelmir-395	chr5	119168329	119168393	+	chr5	+	118718320	118718384
miRNA	mmu-novelmiR-395-5p	chr5	119168329	119168353	+	chr5	+	118718320	118718344
miRNA	mmu-novelmiR-395-3p	chr5	119168374	119168393	+	chr5	+	118718365	118718384
premiRNA	mmu-novelmir-396	chr5	120130531	120130603	+	chr5	+	119680522	119680594
miRNA	mmu-novelmiR-396-3p	chr5	120130583	120130603	+	chr5	+	119680574	119680594
miRNA	mmu-novelmiR-396-5p	chr5	120130531	120130553	+	chr5	+	119680522	119680544
premiRNA	mmu-novelmir-397	chr5	121655006	121655094	+	chr5	+	121204997	121205085
miRNA	mmu-novelmiR-397-3p	chr5	121655070	121655094	+	chr5	+	121205061	121205085
miRNA	mmu-novelmiR-397-5p	chr5	121655006	121655027	+	chr5	+	121204997	121205018
premiRNA	mmu-novelmir-398	chr5	121952644	121952718	-	chr5	-	121502635	121502709
miRNA	mmu-novelmiR-398-3p	chr5	121952644	121952668	-	chr5	-	121502635	121502659
miRNA	mmu-novelmiR-398-5p	chr5	121952691	121952718	-	chr5	-	121502682	121502709
premiRNA	mmu-novelmir-399	chr5	123618312	123618400	+	chr5	+	123168303	123168391
miRNA	mmu-novelmiR-399-5p	chr5	123618312	123618332	+	chr5	+	123168303	123168323
miRNA	mmu-novelmiR-399-3p	chr5	123618377	123618400	+	chr5	+	123168368	123168391
premiRNA	mmu-novelmir-400	chr5	124238762	124238824	+	chr5	+	123788753	123788815
miRNA	mmu-novelmiR-400-3p	chr5	124238802	124238824	+	chr5	+	123788793	123788815
miRNA	mmu-novelmiR-400-5p	chr5	124238762	124238789	+	chr5	+	123788753	123788780
premiRNA	mmu-novelmir-401	chr5	124467520	124467581	-	chr5	-	124017511	124017572
miRNA	mmu-novelmiR-401-3p	chr5	124467520	124467541	-	chr5	-	124017511	124017532
miRNA	mmu-novelmiR-401-5p	chr5	124467561	124467581	-	chr5	-	124017552	124017572
premiRNA	mmu-novelmir-402	chr5	125874119	125874197	+	chr5	+	125393749	125393827
miRNA	mmu-novelmiR-402-5p	chr5	125874119	125874136	+	chr5	+	125393749	125393766
miRNA	mmu-novelmiR-402-3p	chr5	125874178	125874197	+	chr5	+	125393808	125393827
premiRNA	mmu-novelmir-403	chr5	128123433	128123497	+	chr5	+	127643063	127643127
miRNA	mmu-novelmiR-403-3p	chr5	128123475	128123497	+	chr5	+	127643105	127643127
miRNA	mmu-novelmiR-403-5p	chr5	128123433	128123455	+	chr5	+	127643063	127643085
premiRNA	mmu-novelmir-404	chr5	129152625	129152693	-	chr5	-	128646750	128646818
miRNA	mmu-novelmiR-404-3p	chr5	129152625	129152647	-	chr5	-	128646750	128646772
miRNA	mmu-novelmiR-404-5p	chr5	129152672	129152693	-	chr5	-	128646797	128646818
premiRNA	mmu-novelmir-405	chr5	129493901	129493961	-	chr5	-	128988026	128988086
miRNA	mmu-novelmiR-405-5p	chr5	129493939	129493961	-	chr5	-	128988064	128988086
miRNA	mmu-novelmiR-405-3p	chr5	129493901	129493922	-	chr5	-	128988026	128988047
premiRNA	mmu-novelmir-406	chr5	129531542	129531602	+	chr5	+	129025667	129025727
miRNA	mmu-novelmiR-406-5p	chr5	129531542	129531564	+	chr5	+	129025667	129025689
miRNA	mmu-novelmiR-406-3p	chr5	129531581	129531602	+	chr5	+	129025706	129025727
premiRNA	mmu-novelmir-407	chr5	130032923	130032975	+	chr5	+	129527048	129527100
miRNA	mmu-novelmiR-407-3p	chr5	130032955	130032975	+	chr5	+	129527080	129527100
miRNA	mmu-novelmiR-407-5p	chr5	130032923	130032944	+	chr5	+	129527048	129527069
premiRNA	mmu-novelmir-408	chr5	130164717	130164785	-	chr5	-	129658842	129658910
miRNA	mmu-novelmiR-408-3p	chr5	130164717	130164741	-	chr5	-	129658842	129658866
miRNA	mmu-novelmiR-408-5p	chr5	130164761	130164785	-	chr5	-	129658886	129658910
premiRNA	mmu-novelmir-409	chr5	130295315	130295374	+	chr5	+	129789439	129789498
miRNA	mmu-novelmiR-409-5p	chr5	130295315	130295337	+	chr5	+	129789439	129789461
miRNA	mmu-novelmiR-409-3p	chr5	130295351	130295374	+	chr5	+	129789475	129789498
premiRNA	mmu-novelmir-410	chr5	136347672	136347732	+	chr5	+	135871802	135871862
miRNA	mmu-novelmiR-410-5p	chr5	136347672	136347692	+	chr5	+	135871802	135871822
miRNA	mmu-novelmiR-410-3p	chr5	136347712	136347732	+	chr5	+	135871842	135871862
premiRNA	mmu-novelmir-411	chr5	136386072	136386150	-	chr5	-	135910202	135910280
miRNA	mmu-novelmiR-411-5p	chr5	136386126	136386150	-	chr5	-	135910256	135910280
miRNA	mmu-novelmiR-411-3p	chr5	136386072	136386100	-	chr5	-	135910202	135910230
premiRNA	mmu-novelmir-412	chr5	138151822	138151884	-	chr5	-	137710594	137710656
miRNA	mmu-novelmiR-412-3p	chr5	138151822	138151843	-	chr5	-	137710594	137710615
miRNA	mmu-novelmiR-412-5p	chr5	138151863	138151884	-	chr5	-	137710635	137710656
premiRNA	mmu-novelmir-413	chr5	138151823	138151887	+	chr5	+	137710595	137710659
miRNA	mmu-novelmiR-413-3p	chr5	138151865	138151887	+	chr5	+	137710637	137710659
miRNA	mmu-novelmiR-413-5p	chr5	138151823	138151845	+	chr5	+	137710595	137710617
premiRNA	mmu-novelmir-414	chr5	138228898	138228971	+	chr5	+	137787670	137787743
miRNA	mmu-novelmiR-414-3p	chr5	138228947	138228971	+	chr5	+	137787719	137787743
miRNA	mmu-novelmiR-414-5p	chr5	138228898	138228918	+	chr5	+	137787670	137787690
premiRNA	mmu-novelmir-415	chr5	139787980	139788038	-	chr5	-	139312026	139312084
miRNA	mmu-novelmiR-415-3p	chr5	139787980	139788001	-	chr5	-	139312026	139312047
miRNA	mmu-novelmiR-415-5p	chr5	139788017	139788038	-	chr5	-	139312063	139312084
premiRNA	mmu-novelmir-416	chr5	140247680	140247738	-	chr5	-	139771726	139771784
miRNA	mmu-novelmiR-416-3p	chr5	140247680	140247700	-	chr5	-	139771726	139771746
miRNA	mmu-novelmiR-416-5p	chr5	140247716	140247738	-	chr5	-	139771762	139771784
premiRNA	mmu-novelmir-417	chr5	140299732	140299822	-	chr5	-	139823778	139823868
miRNA	mmu-novelmiR-417-3p	chr5	140299732	140299749	-	chr5	-	139823778	139823795
miRNA	mmu-novelmiR-417-5p	chr5	140299801	140299822	-	chr5	-	139823847	139823868
premiRNA	mmu-novelmir-418	chr5	140820636	140820703	-	chr5	-	140344682	140344749
miRNA	mmu-novelmiR-418-5p	chr5	140820683	140820703	-	chr5	-	140344729	140344749
miRNA	mmu-novelmiR-418-3p	chr5	140820636	140820656	-	chr5	-	140344682	140344702
premiRNA	mmu-novelmir-419	chr5	141090204	141090253	+	chr5	+	140614250	140614299
miRNA	mmu-novelmiR-419-5p	chr5	141090204	141090224	+	chr5	+	140614250	140614270
miRNA	mmu-novelmiR-419-3p	chr5	141090231	141090253	+	chr5	+	140614277	140614299
premiRNA	mmu-novelmir-420	chr5	143656843	143656930	-	chr5	-	142895164	142895251
miRNA	mmu-novelmiR-420-5p	chr5	143656913	143656930	-	chr5	-	142895234	142895251
miRNA	mmu-novelmiR-420-3p	chr5	143656843	143656861	-	chr5	-	142895164	142895182
premiRNA	mmu-novelmir-421	chr5	143661038	143661114	-	chr5	-	142899359	142899435
miRNA	mmu-novelmiR-421-5p	chr5	143661097	143661114	-	chr5	-	142899418	142899435
miRNA	mmu-novelmiR-421-3p	chr5	143661038	143661058	-	chr5	-	142899359	142899379
premiRNA	mmu-novelmir-422	chr5	143665575	143665642	-	chr5	-	142903896	142903963
miRNA	mmu-novelmiR-422-3p	chr5	143665575	143665599	-	chr5	-	142903896	142903920
miRNA	mmu-novelmiR-422-5p	chr5	143665625	143665642	-	chr5	-	142903946	142903963
premiRNA	mmu-novelmir-423	chr5	144266541	144266627	-	chr5	-	143505673	143505759
miRNA	mmu-novelmiR-423-3p	chr5	144266541	144266562	-	chr5	-	143505673	143505694
miRNA	mmu-novelmiR-423-5p	chr5	144266609	144266627	-	chr5	-	143505741	143505759
premiRNA	mmu-novelmir-424	chr5	144753417	144753465	-	chr5	-	143992548	143992596
miRNA	mmu-novelmiR-424-5p	chr5	144753441	144753465	-	chr5	-	143992572	143992596
miRNA	mmu-novelmiR-424-3p	chr5	144753417	144753436	-	chr5	-	143992548	143992567
premiRNA	mmu-novelmir-425	chr5	145726479	145726542	-	chr5	-	144965610	144965673
miRNA	mmu-novelmiR-425-5p	chr5	145726524	145726542	-	chr5	-	144965655	144965673
miRNA	mmu-novelmiR-425-3p	chr5	145726479	145726496	-	chr5	-	144965610	144965627
premiRNA	mmu-novelmir-426	chr5	149266292	149266373	-	chr5	-	148454716	148454797
miRNA	mmu-novelmiR-426-5p	chr5	149266352	149266373	-	chr5	-	148454776	148454797
miRNA	mmu-novelmiR-426-3p	chr5	149266292	149266314	-	chr5	-	148454716	148454738
premiRNA	mmu-novelmir-427	chr6	4853610	4853674	-	chr6	-	4903610	4903674
miRNA	mmu-novelmiR-427-3p	chr6	4853610	4853631	-	chr6	-	4903610	4903631
miRNA	mmu-novelmiR-427-5p	chr6	4853649	4853674	-	chr6	-	4903649	4903674
premiRNA	mmu-novelmir-428	chr6	6152676	6152735	-	chr6	-	6202676	6202735
miRNA	mmu-novelmiR-428-3p	chr6	6152676	6152696	-	chr6	-	6202676	6202696
miRNA	mmu-novelmiR-428-5p	chr6	6152713	6152735	-	chr6	-	6202713	6202735
premiRNA	mmu-novelmir-429	chr6	11876500	11876580	+	chr6	+	11926500	11926580
miRNA	mmu-novelmiR-429-3p	chr6	11876557	11876580	+	chr6	+	11926557	11926580
miRNA	mmu-novelmiR-429-5p	chr6	11876500	11876526	+	chr6	+	11926500	11926526
premiRNA	mmu-novelmir-430	chr6	19095790	19095853	-	chr6	-	19145790	19145853
miRNA	mmu-novelmiR-430-3p	chr6	19095790	19095808	-	chr6	-	19145790	19145808
miRNA	mmu-novelmiR-430-5p	chr6	19095834	19095853	-	chr6	-	19145834	19145853
premiRNA	mmu-novelmir-431	chr6	28822116	28822178	+	chr6	+	28872116	28872178
miRNA	mmu-novelmiR-431-3p	chr6	28822158	28822178	+	chr6	+	28872158	28872178
miRNA	mmu-novelmiR-431-5p	chr6	28822116	28822140	+	chr6	+	28872116	28872140
premiRNA	mmu-novelmir-432	chr6	30115925	30115987	+	chr6	+	30165925	30165987
miRNA	mmu-novelmiR-432-5p	chr6	30115925	30115946	+	chr6	+	30165925	30165946
miRNA	mmu-novelmiR-432-3p	chr6	30115963	30115987	+	chr6	+	30165963	30165987
premiRNA	mmu-novelmir-433	chr6	30119672	30119735	+	chr6	+	30169672	30169735
miRNA	mmu-novelmiR-433-5p	chr6	30119672	30119695	+	chr6	+	30169672	30169695
miRNA	mmu-novelmiR-433-3p	chr6	30119712	30119735	+	chr6	+	30169712	30169735
premiRNA	mmu-novelmir-434	chr6	30124162	30124222	-	chr6	-	30174162	30174222
miRNA	mmu-novelmiR-434-3p	chr6	30124162	30124182	-	chr6	-	30174162	30174182
miRNA	mmu-novelmiR-434-5p	chr6	30124199	30124222	-	chr6	-	30174199	30174222
premiRNA	mmu-novelmir-435	chr6	30691314	30691371	-	chr6	-	30741314	30741371
miRNA	mmu-novelmiR-435-3p	chr6	30691314	30691335	-	chr6	-	30741314	30741335
miRNA	mmu-novelmiR-435-5p	chr6	30691349	30691371	-	chr6	-	30741349	30741371
premiRNA	mmu-novelmir-436	chr6	30701454	30701510	+	chr6	+	30751454	30751510
miRNA	mmu-novelmiR-436-3p	chr6	30701487	30701510	+	chr6	+	30751487	30751510
miRNA	mmu-novelmiR-436-5p	chr6	30701454	30701478	+	chr6	+	30751454	30751478
premiRNA	mmu-novelmir-437	chr6	35860620	35860696	+	chr6	+	35910620	35910696
miRNA	mmu-novelmiR-437-3p	chr6	35860675	35860696	+	chr6	+	35910675	35910696
miRNA	mmu-novelmiR-437-5p	chr6	35860620	35860637	+	chr6	+	35910620	35910637
premiRNA	mmu-novelmir-438	chr6	39156687	39156772	-	chr6	-	39206688	39206773
miRNA	mmu-novelmiR-438-3p	chr6	39156687	39156709	-	chr6	-	39206688	39206710
miRNA	mmu-novelmiR-438-5p	chr6	39156745	39156772	-	chr6	-	39206746	39206773
premiRNA	mmu-novelmir-439	chr6	39157054	39157117	+	chr6	+	39207055	39207118
miRNA	mmu-novelmiR-439-3p	chr6	39157095	39157117	+	chr6	+	39207096	39207118
miRNA	mmu-novelmiR-439-5p	chr6	39157054	39157076	+	chr6	+	39207055	39207077
premiRNA	mmu-novelmir-440	chr6	39674793	39674876	+	chr6	+	39724794	39724877
miRNA	mmu-novelmiR-440-5p	chr6	39674793	39674810	+	chr6	+	39724794	39724811
miRNA	mmu-novelmiR-440-3p	chr6	39674860	39674876	+	chr6	+	39724861	39724877
premiRNA	mmu-novelmir-441	chr6	42300886	42300945	+	chr6	+	42350887	42350946
miRNA	mmu-novelmiR-441-5p	chr6	42300886	42300907	+	chr6	+	42350887	42350908
miRNA	mmu-novelmiR-441-3p	chr6	42300924	42300945	+	chr6	+	42350925	42350946
premiRNA	mmu-novelmir-442	chr6	42595339	42595401	+	chr6	+	42645340	42645402
miRNA	mmu-novelmiR-442-5p	chr6	42595339	42595362	+	chr6	+	42645340	42645363
miRNA	mmu-novelmiR-442-3p	chr6	42595377	42595401	+	chr6	+	42645378	42645402
premiRNA	mmu-novelmir-443	chr6	47480555	47480619	-	chr6	-	47530556	47530620
miRNA	mmu-novelmiR-443-3p	chr6	47480555	47480574	-	chr6	-	47530556	47530575
miRNA	mmu-novelmiR-443-5p	chr6	47480597	47480619	-	chr6	-	47530598	47530620
premiRNA	mmu-novelmir-444	chr6	47870671	47870749	-	chr6	-	47920672	47920750
miRNA	mmu-novelmiR-444-5p	chr6	47870732	47870749	-	chr6	-	47920733	47920750
miRNA	mmu-novelmiR-444-3p	chr6	47870671	47870694	-	chr6	-	47920672	47920695
premiRNA	mmu-novelmir-445	chr6	47927389	47927481	-	chr6	-	47977390	47977482
miRNA	mmu-novelmiR-445-5p	chr6	47927458	47927481	-	chr6	-	47977459	47977482
miRNA	mmu-novelmiR-445-3p	chr6	47927389	47927412	-	chr6	-	47977390	47977413
premiRNA	mmu-novelmir-446	chr6	48467149	48467205	+	chr6	+	48517150	48517206
miRNA	mmu-novelmiR-446-3p	chr6	48467183	48467205	+	chr6	+	48517184	48517206
miRNA	mmu-novelmiR-446-5p	chr6	48467149	48467170	+	chr6	+	48517150	48517171
premiRNA	mmu-novelmir-447	chr6	48698432	48698489	+	chr6	+	48748433	48748490
miRNA	mmu-novelmiR-447-3p	chr6	48698466	48698489	+	chr6	+	48748467	48748490
miRNA	mmu-novelmiR-447-5p	chr6	48698432	48698455	+	chr6	+	48748433	48748456
premiRNA	mmu-novelmir-448	chr6	49096102	49096160	-	chr6	-	49146103	49146161
miRNA	mmu-novelmiR-448-3p	chr6	49096102	49096123	-	chr6	-	49146103	49146124
miRNA	mmu-novelmiR-448-5p	chr6	49096138	49096160	-	chr6	-	49146139	49146161
premiRNA	mmu-novelmir-449	chr6	51413225	51413276	-	chr6	-	51463226	51463277
miRNA	mmu-novelmiR-449-3p	chr6	51413225	51413248	-	chr6	-	51463226	51463249
miRNA	mmu-novelmiR-449-5p	chr6	51413256	51413276	-	chr6	-	51463257	51463277
premiRNA	mmu-novelmir-450	chr6	51413416	51413473	-	chr6	-	51463417	51463474
miRNA	mmu-novelmiR-450-3p	chr6	51413416	51413435	-	chr6	-	51463417	51463436
miRNA	mmu-novelmiR-450-5p	chr6	51413450	51413473	-	chr6	-	51463451	51463474
premiRNA	mmu-novelmir-451	chr6	51464622	51464669	-	chr6	-	51514623	51514670
miRNA	mmu-novelmiR-451-5p	chr6	51464648	51464669	-	chr6	-	51514649	51514670
miRNA	mmu-novelmiR-451-3p	chr6	51464622	51464640	-	chr6	-	51514623	51514641
premiRNA	mmu-novelmir-452	chr6	52589293	52589350	-	chr6	-	52639299	52639356
miRNA	mmu-novelmiR-452-3p	chr6	52589293	52589312	-	chr6	-	52639299	52639318
miRNA	mmu-novelmiR-452-5p	chr6	52589331	52589350	-	chr6	-	52639337	52639356
premiRNA	mmu-novelmir-453	chr6	52902241	52902298	-	chr6	-	52952247	52952304
miRNA	mmu-novelmiR-453-3p	chr6	52902241	52902262	-	chr6	-	52952247	52952268
miRNA	mmu-novelmiR-453-5p	chr6	52902277	52902298	-	chr6	-	52952283	52952304
premiRNA	mmu-novelmir-454	chr6	54207115	54207178	+	chr6	+	54257121	54257184
miRNA	mmu-novelmiR-454-3p	chr6	54207157	54207178	+	chr6	+	54257163	54257184
miRNA	mmu-novelmiR-454-5p	chr6	54207115	54207136	+	chr6	+	54257121	54257142
premiRNA	mmu-novelmir-455	chr6	55414628	55414691	+	chr6	+	55464634	55464697
miRNA	mmu-novelmiR-455-3p	chr6	55414668	55414691	+	chr6	+	55464674	55464697
miRNA	mmu-novelmiR-455-5p	chr6	55414628	55414651	+	chr6	+	55464634	55464657
premiRNA	mmu-novelmir-456	chr6	64291768	64291829	+	chr6	+	64341774	64341835
miRNA	mmu-novelmiR-456-5p	chr6	64291768	64291789	+	chr6	+	64341774	64341795
miRNA	mmu-novelmiR-456-3p	chr6	64291808	64291829	+	chr6	+	64341814	64341835
premiRNA	mmu-novelmir-457	chr6	65851598	65851663	+	chr6	+	65901604	65901669
miRNA	mmu-novelmiR-457-5p	chr6	65851598	65851620	+	chr6	+	65901604	65901626
miRNA	mmu-novelmiR-457-3p	chr6	65851642	65851663	+	chr6	+	65901648	65901669
premiRNA	mmu-novelmir-458	chr6	71340050	71340130	-	chr6	-	71390056	71390136
miRNA	mmu-novelmiR-458-5p	chr6	71340106	71340130	-	chr6	-	71390112	71390136
miRNA	mmu-novelmiR-458-3p	chr6	71340050	71340073	-	chr6	-	71390056	71390079
premiRNA	mmu-novelmir-459	chr6	72841342	72841392	-	chr6	-	72891348	72891398
miRNA	mmu-novelmiR-459-3p	chr6	72841342	72841364	-	chr6	-	72891348	72891370
miRNA	mmu-novelmiR-459-5p	chr6	72841369	72841392	-	chr6	-	72891375	72891398
premiRNA	mmu-novelmir-460	chr6	72864662	72864726	+	chr6	+	72914668	72914732
miRNA	mmu-novelmiR-460-5p	chr6	72864662	72864683	+	chr6	+	72914668	72914689
miRNA	mmu-novelmiR-460-3p	chr6	72864705	72864726	+	chr6	+	72914711	72914732
premiRNA	mmu-novelmir-461	chr6	82715660	82715718	-	chr6	-	82765666	82765724
miRNA	mmu-novelmiR-461-5p	chr6	82715698	82715718	-	chr6	-	82765704	82765724
miRNA	mmu-novelmiR-461-3p	chr6	82715660	82715680	-	chr6	-	82765666	82765686
premiRNA	mmu-novelmir-462	chr6	83390195	83390244	-	chr6	-	83440201	83440250
miRNA	mmu-novelmiR-462-3p	chr6	83390195	83390215	-	chr6	-	83440201	83440221
miRNA	mmu-novelmiR-462-5p	chr6	83390224	83390244	-	chr6	-	83440230	83440250
premiRNA	mmu-novelmir-463	chr6	83391347	83391419	-	chr6	-	83441353	83441425
miRNA	mmu-novelmiR-463-3p	chr6	83391347	83391369	-	chr6	-	83441353	83441375
miRNA	mmu-novelmiR-463-5p	chr6	83391397	83391419	-	chr6	-	83441403	83441425
premiRNA	mmu-novelmir-464	chr6	87449412	87449472	-	chr6	-	87499418	87499478
miRNA	mmu-novelmiR-464-5p	chr6	87449451	87449472	-	chr6	-	87499457	87499478
miRNA	mmu-novelmiR-464-3p	chr6	87449412	87449433	-	chr6	-	87499418	87499439
premiRNA	mmu-novelmir-465	chr6	87800600	87800655	+	chr6	+	87850606	87850661
miRNA	mmu-novelmiR-465-3p	chr6	87800632	87800655	+	chr6	+	87850638	87850661
miRNA	mmu-novelmiR-465-5p	chr6	87800600	87800618	+	chr6	+	87850606	87850624
premiRNA	mmu-novelmir-466	chr6	87854890	87854936	+	chr6	+	87904896	87904942
miRNA	mmu-novelmiR-466-5p	chr6	87854890	87854910	+	chr6	+	87904896	87904916
miRNA	mmu-novelmiR-466-3p	chr6	87854918	87854936	+	chr6	+	87904924	87904942
premiRNA	mmu-novelmir-467	chr6	87988578	87988652	-	chr6	-	88038584	88038658
miRNA	mmu-novelmiR-467-5p	chr6	87988629	87988652	-	chr6	-	88038635	88038658
miRNA	mmu-novelmiR-467-3p	chr6	87988578	87988598	-	chr6	-	88038584	88038604
premiRNA	mmu-novelmir-468	chr6	88455052	88455105	-	chr6	-	88505058	88505111
miRNA	mmu-novelmiR-468-5p	chr6	88455084	88455105	-	chr6	-	88505090	88505111
miRNA	mmu-novelmiR-468-3p	chr6	88455052	88455075	-	chr6	-	88505058	88505081
premiRNA	mmu-novelmir-469	chr6	88837470	88837522	-	chr6	-	88887476	88887528
miRNA	mmu-novelmiR-469-5p	chr6	88837500	88837522	-	chr6	-	88887506	88887528
miRNA	mmu-novelmiR-469-3p	chr6	88837470	88837494	-	chr6	-	88887476	88887500
premiRNA	mmu-novelmir-470	chr6	88838731	88838794	-	chr6	-	88888737	88888800
miRNA	mmu-novelmiR-470-3p	chr6	88838731	88838751	-	chr6	-	88888737	88888757
miRNA	mmu-novelmiR-470-5p	chr6	88838772	88838794	-	chr6	-	88888778	88888800
premiRNA	mmu-novelmir-471	chr6	91208322	91208373	+	chr6	+	91258328	91258379
miRNA	mmu-novelmiR-471-5p	chr6	91208322	91208339	+	chr6	+	91258328	91258345
miRNA	mmu-novelmiR-471-3p	chr6	91208358	91208373	+	chr6	+	91258364	91258379
premiRNA	mmu-novelmir-472	chr6	93749366	93749426	-	chr6	-	93799372	93799432
miRNA	mmu-novelmiR-472-5p	chr6	93749404	93749426	-	chr6	-	93799410	93799432
miRNA	mmu-novelmiR-472-3p	chr6	93749366	93749388	-	chr6	-	93799372	93799394
premiRNA	mmu-novelmir-473	chr6	97179556	97179631	+	chr6	+	97229562	97229637
miRNA	mmu-novelmiR-473-3p	chr6	97179611	97179631	+	chr6	+	97229617	97229637
miRNA	mmu-novelmiR-473-5p	chr6	97179556	97179574	+	chr6	+	97229562	97229580
premiRNA	mmu-novelmir-474	chr6	99134956	99135013	-	chr6	-	99184962	99185019
miRNA	mmu-novelmiR-474-3p	chr6	99134956	99134976	-	chr6	-	99184962	99184982
miRNA	mmu-novelmiR-474-5p	chr6	99134993	99135013	-	chr6	-	99184999	99185019
premiRNA	mmu-novelmir-475	chr6	102617316	102617379	-	chr6	-	102667322	102667385
miRNA	mmu-novelmiR-475-3p	chr6	102617316	102617334	-	chr6	-	102667322	102667340
miRNA	mmu-novelmiR-475-5p	chr6	102617360	102617379	-	chr6	-	102667366	102667385
premiRNA	mmu-novelmir-476	chr6	113348186	113348267	+	chr6	+	113398192	113398273
miRNA	mmu-novelmiR-476-5p	chr6	113348186	113348207	+	chr6	+	113398192	113398213
miRNA	mmu-novelmiR-476-3p	chr6	113348244	113348267	+	chr6	+	113398250	113398273
premiRNA	mmu-novelmir-477	chr6	115877336	115877392	-	chr6	-	115927318	115927374
miRNA	mmu-novelmiR-477-3p	chr6	115877336	115877358	-	chr6	-	115927318	115927340
miRNA	mmu-novelmiR-477-5p	chr6	115877367	115877392	-	chr6	-	115927349	115927374
premiRNA	mmu-novelmir-478	chr6	116344713	116344770	+	chr6	+	116394695	116394752
miRNA	mmu-novelmiR-478-3p	chr6	116344749	116344770	+	chr6	+	116394731	116394752
miRNA	mmu-novelmiR-478-5p	chr6	116344713	116344733	+	chr6	+	116394695	116394715
premiRNA	mmu-novelmir-479	chr6	116930322	116930381	-	chr6	-	116980304	116980363
miRNA	mmu-novelmiR-479-5p	chr6	116930359	116930381	-	chr6	-	116980341	116980363
miRNA	mmu-novelmiR-479-3p	chr6	116930322	116930346	-	chr6	-	116980304	116980328
premiRNA	mmu-novelmir-480	chr6	117857225	117857294	+	chr6	+	117907207	117907276
miRNA	mmu-novelmiR-480-3p	chr6	117857276	117857294	+	chr6	+	117907258	117907276
miRNA	mmu-novelmiR-480-5p	chr6	117857225	117857242	+	chr6	+	117907207	117907224
premiRNA	mmu-novelmir-481	chr6	119357685	119357767	-	chr6	-	119407667	119407749
miRNA	mmu-novelmiR-481-5p	chr6	119357746	119357767	-	chr6	-	119407728	119407749
miRNA	mmu-novelmiR-481-3p	chr6	119357685	119357706	-	chr6	-	119407667	119407688
premiRNA	mmu-novelmir-482	chr6	119429959	119430044	-	chr6	-	119479941	119480026
miRNA	mmu-novelmiR-482-3p	chr6	119429959	119429982	-	chr6	-	119479941	119479964
miRNA	mmu-novelmiR-482-5p	chr6	119430023	119430044	-	chr6	-	119480005	119480026
premiRNA	mmu-novelmir-483	chr6	119905580	119905653	-	chr6	-	119955562	119955635
miRNA	mmu-novelmiR-483-3p	chr6	119905580	119905602	-	chr6	-	119955562	119955584
miRNA	mmu-novelmiR-483-5p	chr6	119905632	119905653	-	chr6	-	119955614	119955635
premiRNA	mmu-novelmir-484	chr6	120710191	120710269	+	chr6	+	120760173	120760251
miRNA	mmu-novelmiR-484-5p	chr6	120710191	120710214	+	chr6	+	120760173	120760196
miRNA	mmu-novelmiR-484-3p	chr6	120710249	120710269	+	chr6	+	120760231	120760251
premiRNA	mmu-novelmir-485	chr6	120745383	120745437	-	chr6	-	120795365	120795419
miRNA	mmu-novelmiR-485-3p	chr6	120745383	120745403	-	chr6	-	120795365	120795385
miRNA	mmu-novelmiR-485-5p	chr6	120745417	120745437	-	chr6	-	120795399	120795419
premiRNA	mmu-novelmir-486	chr6	122257327	122257388	-	chr6	-	122307309	122307370
miRNA	mmu-novelmiR-486-5p	chr6	122257368	122257388	-	chr6	-	122307350	122307370
miRNA	mmu-novelmiR-486-3p	chr6	122257327	122257347	-	chr6	-	122307309	122307329
premiRNA	mmu-novelmir-487	chr6	124909042	124909097	-	chr6	-	124959024	124959079
miRNA	mmu-novelmiR-487-3p	chr6	124909042	124909066	-	chr6	-	124959024	124959048
miRNA	mmu-novelmiR-487-5p	chr6	124909076	124909097	-	chr6	-	124959058	124959079
premiRNA	mmu-novelmir-488	chr6	124997408	124997499	+	chr6	+	125047390	125047481
miRNA	mmu-novelmiR-488-3p	chr6	124997475	124997499	+	chr6	+	125047457	125047481
miRNA	mmu-novelmiR-488-5p	chr6	124997408	124997431	+	chr6	+	125047390	125047413
premiRNA	mmu-novelmir-489	chr6	125070655	125070704	+	chr6	+	125120637	125120686
miRNA	mmu-novelmiR-489-3p	chr6	125070683	125070704	+	chr6	+	125120665	125120686
miRNA	mmu-novelmiR-489-5p	chr6	125070655	125070678	+	chr6	+	125120637	125120660
premiRNA	mmu-novelmir-490	chr6	125071742	125071809	+	chr6	+	125121724	125121791
miRNA	mmu-novelmiR-490-5p	chr6	125071742	125071759	+	chr6	+	125121724	125121741
miRNA	mmu-novelmiR-490-3p	chr6	125071794	125071809	+	chr6	+	125121776	125121791
premiRNA	mmu-novelmir-491	chr6	125115732	125115782	+	chr6	+	125165714	125165764
miRNA	mmu-novelmiR-491-3p	chr6	125115761	125115782	+	chr6	+	125165743	125165764
miRNA	mmu-novelmiR-491-5p	chr6	125115732	125115755	+	chr6	+	125165714	125165737
premiRNA	mmu-novelmir-492	chr6	125363825	125363904	+	chr6	+	125413807	125413886
miRNA	mmu-novelmiR-492-5p	chr6	125363825	125363848	+	chr6	+	125413807	125413830
miRNA	mmu-novelmiR-492-3p	chr6	125363879	125363904	+	chr6	+	125413861	125413886
premiRNA	mmu-novelmir-493	chr6	126712141	126712225	-	chr6	-	126762123	126762207
miRNA	mmu-novelmiR-493-5p	chr6	126712205	126712225	-	chr6	-	126762187	126762207
miRNA	mmu-novelmiR-493-3p	chr6	126712141	126712165	-	chr6	-	126762123	126762147
premiRNA	mmu-novelmir-494	chr6	128273145	128273195	-	chr6	-	128323127	128323177
miRNA	mmu-novelmiR-494-5p	chr6	128273174	128273195	-	chr6	-	128323156	128323177
miRNA	mmu-novelmiR-494-3p	chr6	128273145	128273166	-	chr6	-	128323127	128323148
premiRNA	mmu-novelmir-495	chr6	128799727	128799784	-	chr6	-	128849709	128849766
miRNA	mmu-novelmiR-495-3p	chr6	128799727	128799749	-	chr6	-	128849709	128849731
miRNA	mmu-novelmiR-495-5p	chr6	128799766	128799784	-	chr6	-	128849748	128849766
premiRNA	mmu-novelmir-496	chr6	129807285	129807348	-	chr6	-	129857267	129857330
miRNA	mmu-novelmiR-496-3p	chr6	129807285	129807302	-	chr6	-	129857267	129857284
miRNA	mmu-novelmiR-496-5p	chr6	129807330	129807348	-	chr6	-	129857312	129857330
premiRNA	mmu-novelmir-497	chr6	134181019	134181085	+	chr6	+	134231001	134231067
miRNA	mmu-novelmiR-497-5p	chr6	134181019	134181039	+	chr6	+	134231001	134231021
miRNA	mmu-novelmiR-497-3p	chr6	134181068	134181085	+	chr6	+	134231050	134231067
premiRNA	mmu-novelmir-498	chr6	134188623	134188682	+	chr6	+	134238605	134238664
miRNA	mmu-novelmiR-498-3p	chr6	134188663	134188682	+	chr6	+	134238645	134238664
miRNA	mmu-novelmiR-498-5p	chr6	134188623	134188644	+	chr6	+	134238605	134238626
premiRNA	mmu-novelmir-499	chr6	142203931	142203995	-	chr6	-	142255411	142255475
miRNA	mmu-novelmiR-499-5p	chr6	142203974	142203995	-	chr6	-	142255454	142255475
miRNA	mmu-novelmiR-499-3p	chr6	142203931	142203951	-	chr6	-	142255411	142255431
premiRNA	mmu-novelmir-500	chr6	144996295	144996343	+	chr6	+	145047775	145047823
miRNA	mmu-novelmiR-500-3p	chr6	144996321	144996343	+	chr6	+	145047801	145047823
miRNA	mmu-novelmiR-500-5p	chr6	144996295	144996315	+	chr6	+	145047775	145047795
premiRNA	mmu-novelmir-501	chr7	3598345	3598418	+	chr7	+	3646743	3646816
miRNA	mmu-novelmiR-501-5p	chr7	3598345	3598369	+	chr7	+	3646743	3646767
miRNA	mmu-novelmiR-501-3p	chr7	3598392	3598418	+	chr7	+	3646790	3646816
premiRNA	mmu-novelmir-502	chr7	4479588	4479651	-	chr7	-	4527986	4528049
miRNA	mmu-novelmiR-502-3p	chr7	4479588	4479608	-	chr7	-	4527986	4528006
miRNA	mmu-novelmiR-502-5p	chr7	4479628	4479651	-	chr7	-	4528026	4528049
premiRNA	mmu-novelmir-503	chr7	4692836	4692902	+	chr7	+	4741234	4741300
miRNA	mmu-novelmiR-503-3p	chr7	4692880	4692902	+	chr7	+	4741278	4741300
miRNA	mmu-novelmiR-503-5p	chr7	4692836	4692860	+	chr7	+	4741234	4741258
premiRNA	mmu-novelmir-504	chr7	4869567	4869632	+	chr7	+	4917965	4918030
miRNA	mmu-novelmiR-504-3p	chr7	4869611	4869632	+	chr7	+	4918009	4918030
miRNA	mmu-novelmiR-504-5p	chr7	4869567	4869590	+	chr7	+	4917965	4917988
premiRNA	mmu-novelmir-505	chr7	6134056	6134112	+	chr7	+	6182454	6182510
miRNA	mmu-novelmiR-505-5p	chr7	6134056	6134078	+	chr7	+	6182454	6182476
miRNA	mmu-novelmiR-505-3p	chr7	6134092	6134112	+	chr7	+	6182490	6182510
premiRNA	mmu-novelmir-506	chr7	7251602	7251655	-	chr7	-	7298891	7298944
miRNA	mmu-novelmiR-506-3p	chr7	7251602	7251623	-	chr7	-	7298891	7298912
miRNA	mmu-novelmiR-506-5p	chr7	7251635	7251655	-	chr7	-	7298924	7298944
premiRNA	mmu-novelmir-507	chr7	13562270	13562328	-	chr7	-	12976921	12976979
miRNA	mmu-novelmiR-507-5p	chr7	13562305	13562328	-	chr7	-	12976956	12976979
miRNA	mmu-novelmiR-507-3p	chr7	13562270	13562291	-	chr7	-	12976921	12976942
premiRNA	mmu-novelmir-508	chr7	16698499	16698538	+	chr7	+	16113150	16113189
miRNA	mmu-novelmiR-508-3p	chr7	16698521	16698538	+	chr7	+	16113172	16113189
miRNA	mmu-novelmiR-508-5p	chr7	16698499	16698519	+	chr7	+	16113150	16113170
premiRNA	mmu-novelmir-509	chr7	17401093	17401178	-	chr7	-	16815744	16815829
miRNA	mmu-novelmiR-509-3p	chr7	17401093	17401115	-	chr7	-	16815744	16815766
miRNA	mmu-novelmiR-509-5p	chr7	17401156	17401178	-	chr7	-	16815807	16815829
premiRNA	mmu-novelmir-510	chr7	17500942	17500991	-	chr7	-	16915593	16915642
miRNA	mmu-novelmiR-510-5p	chr7	17500968	17500991	-	chr7	-	16915619	16915642
miRNA	mmu-novelmiR-510-3p	chr7	17500942	17500965	-	chr7	-	16915593	16915616
premiRNA	mmu-novelmir-511	chr7	18567487	18567530	+	chr7	+	17982138	17982181
miRNA	mmu-novelmiR-511-3p	chr7	18567513	18567530	+	chr7	+	17982164	17982181
miRNA	mmu-novelmiR-511-5p	chr7	18567487	18567502	+	chr7	+	17982138	17982153
premiRNA	mmu-novelmir-512	chr7	19857765	19857832	+	chr7	+	19272416	19272483
miRNA	mmu-novelmiR-512-5p	chr7	19857765	19857786	+	chr7	+	19272416	19272437
miRNA	mmu-novelmiR-512-3p	chr7	19857809	19857832	+	chr7	+	19272460	19272483
premiRNA	mmu-novelmir-513	chr7	20017222	20017300	-	chr7	-	19431873	19431951
miRNA	mmu-novelmiR-513-5p	chr7	20017278	20017300	-	chr7	-	19431929	19431951
miRNA	mmu-novelmiR-513-3p	chr7	20017222	20017242	-	chr7	-	19431873	19431893
premiRNA	mmu-novelmir-514	chr7	20104368	20104422	-	chr7	-	19519019	19519073
miRNA	mmu-novelmiR-514-3p	chr7	20104368	20104389	-	chr7	-	19519019	19519040
miRNA	mmu-novelmiR-514-5p	chr7	20104400	20104422	-	chr7	-	19519051	19519073
premiRNA	mmu-novelmir-515	chr7	20104370	20104424	+	chr7	+	19519021	19519075
miRNA	mmu-novelmiR-515-5p	chr7	20104370	20104391	+	chr7	+	19519021	19519042
miRNA	mmu-novelmiR-515-3p	chr7	20104402	20104424	+	chr7	+	19519053	19519075
premiRNA	mmu-novelmir-516	chr7	21033714	21033779	-	chr7	-	20448365	20448430
miRNA	mmu-novelmiR-516-3p	chr7	21033714	21033733	-	chr7	-	20448365	20448384
miRNA	mmu-novelmiR-516-5p	chr7	21033761	21033779	-	chr7	-	20448412	20448430
premiRNA	mmu-novelmir-517	chr7	25247484	25247525	+	chr7	+	24462465	24462506
miRNA	mmu-novelmiR-517-3p	chr7	25247505	25247525	+	chr7	+	24462486	24462506
miRNA	mmu-novelmiR-517-5p	chr7	25247484	25247502	+	chr7	+	24462465	24462483
premiRNA	mmu-novelmir-518	chr7	25299955	25300021	-	chr7	-	24514936	24515002
miRNA	mmu-novelmiR-518-3p	chr7	25299955	25299976	-	chr7	-	24514936	24514957
miRNA	mmu-novelmiR-518-5p	chr7	25299997	25300021	-	chr7	-	24514978	24515002
premiRNA	mmu-novelmir-519	chr7	26413345	26413408	-	chr7	-	25628326	25628389
miRNA	mmu-novelmiR-519-5p	chr7	26413387	26413408	-	chr7	-	25628368	25628389
miRNA	mmu-novelmiR-519-3p	chr7	26413345	26413369	-	chr7	-	25628326	25628350
premiRNA	mmu-novelmir-520	chr7	26482260	26482311	+	chr7	+	25697241	25697292
miRNA	mmu-novelmiR-520-5p	chr7	26482260	26482277	+	chr7	+	25697241	25697258
miRNA	mmu-novelmiR-520-3p	chr7	26482293	26482311	+	chr7	+	25697274	25697292
premiRNA	mmu-novelmir-521	chr7	27990593	27990653	-	chr7	-	27205574	27205634
miRNA	mmu-novelmiR-521-5p	chr7	27990632	27990653	-	chr7	-	27205613	27205634
miRNA	mmu-novelmiR-521-3p	chr7	27990593	27990614	-	chr7	-	27205574	27205595
premiRNA	mmu-novelmir-522	chr7	29163519	29163577	-	chr7	-	28378500	28378558
miRNA	mmu-novelmiR-522-3p	chr7	29163519	29163540	-	chr7	-	28378500	28378521
miRNA	mmu-novelmiR-522-5p	chr7	29163558	29163577	-	chr7	-	28378539	28378558
premiRNA	mmu-novelmir-523	chr7	29597215	29597279	+	chr7	+	28812196	28812260
miRNA	mmu-novelmiR-523-3p	chr7	29597259	29597279	+	chr7	+	28812240	28812260
miRNA	mmu-novelmiR-523-5p	chr7	29597215	29597237	+	chr7	+	28812196	28812218
premiRNA	mmu-novelmir-524	chr7	29845153	29845215	-	chr7	-	29060134	29060196
miRNA	mmu-novelmiR-524-3p	chr7	29845153	29845174	-	chr7	-	29060134	29060155
miRNA	mmu-novelmiR-524-5p	chr7	29845194	29845215	-	chr7	-	29060175	29060196
premiRNA	mmu-novelmir-525	chr7	29964595	29964645	+	chr7	+	29179576	29179626
miRNA	mmu-novelmiR-525-5p	chr7	29964595	29964615	+	chr7	+	29179576	29179596
miRNA	mmu-novelmiR-525-3p	chr7	29964626	29964645	+	chr7	+	29179607	29179626
premiRNA	mmu-novelmir-526	chr7	30094345	30094424	+	chr7	+	29309326	29309405
miRNA	mmu-novelmiR-526-5p	chr7	30094345	30094365	+	chr7	+	29309326	29309346
miRNA	mmu-novelmiR-526-3p	chr7	30094403	30094424	+	chr7	+	29309384	29309405
premiRNA	mmu-novelmir-527	chr7	30272584	30272646	-	chr7	-	29487565	29487627
miRNA	mmu-novelmiR-527-3p	chr7	30272584	30272604	-	chr7	-	29487565	29487585
miRNA	mmu-novelmiR-527-5p	chr7	30272627	30272646	-	chr7	-	29487608	29487627
premiRNA	mmu-novelmir-528	chr7	30780051	30780122	-	chr7	-	29995032	29995103
miRNA	mmu-novelmiR-528-5p	chr7	30780100	30780122	-	chr7	-	29995081	29995103
miRNA	mmu-novelmiR-528-3p	chr7	30780051	30780078	-	chr7	-	29995032	29995059
premiRNA	mmu-novelmir-529	chr7	36206460	36206517	+	chr7	+	35421441	35421498
miRNA	mmu-novelmiR-529-3p	chr7	36206498	36206517	+	chr7	+	35421479	35421498
miRNA	mmu-novelmiR-529-5p	chr7	36206460	36206482	+	chr7	+	35421441	35421463
premiRNA	mmu-novelmir-530	chr7	37155702	37155750	-	chr7	-	36370683	36370731
miRNA	mmu-novelmiR-530-3p	chr7	37155702	37155719	-	chr7	-	36370683	36370700
miRNA	mmu-novelmiR-530-5p	chr7	37155732	37155750	-	chr7	-	36370713	36370731
premiRNA	mmu-novelmir-531	chr7	38296638	38296688	-	chr7	-	37511619	37511669
miRNA	mmu-novelmiR-531-5p	chr7	38296669	38296688	-	chr7	-	37511650	37511669
miRNA	mmu-novelmiR-531-3p	chr7	38296638	38296654	-	chr7	-	37511619	37511635
premiRNA	mmu-novelmir-532	chr7	46794311	46794380	+	chr7	+	39538941	39539010
miRNA	mmu-novelmiR-532-5p	chr7	46794311	46794333	+	chr7	+	39538941	39538963
miRNA	mmu-novelmiR-532-3p	chr7	46794360	46794380	+	chr7	+	39538990	39539010
premiRNA	mmu-novelmir-533	chr7	48719805	48719849	+	chr7	+	41464435	41464479
miRNA	mmu-novelmiR-533-3p	chr7	48719832	48719849	+	chr7	+	41464462	41464479
miRNA	mmu-novelmiR-533-5p	chr7	48719805	48719821	+	chr7	+	41464435	41464451
premiRNA	mmu-novelmir-534	chr7	50817658	50817732	+	chr7	+	43562288	43562362
miRNA	mmu-novelmiR-534-5p	chr7	50817658	50817675	+	chr7	+	43562288	43562305
miRNA	mmu-novelmiR-534-3p	chr7	50817714	50817732	+	chr7	+	43562344	43562362
premiRNA	mmu-novelmir-535	chr7	52377131	52377187	-	chr7	-	45121761	45121817
miRNA	mmu-novelmiR-535-3p	chr7	52377131	52377152	-	chr7	-	45121761	45121782
miRNA	mmu-novelmiR-535-5p	chr7	52377167	52377187	-	chr7	-	45121797	45121817
premiRNA	mmu-novelmir-536	chr7	52560451	52560507	-	chr7	-	45305081	45305137
miRNA	mmu-novelmiR-536-3p	chr7	52560451	52560472	-	chr7	-	45305081	45305102
miRNA	mmu-novelmiR-536-5p	chr7	52560486	52560507	-	chr7	-	45305116	45305137
premiRNA	mmu-novelmir-537	chr7	52632526	52632612	-	chr7	-	45377156	45377242
miRNA	mmu-novelmiR-537-5p	chr7	52632590	52632612	-	chr7	-	45377220	45377242
miRNA	mmu-novelmiR-537-3p	chr7	52632526	52632548	-	chr7	-	45377156	45377178
premiRNA	mmu-novelmir-538	chr7	52646395	52646444	-	chr7	-	45391025	45391074
miRNA	mmu-novelmiR-538-5p	chr7	52646422	52646444	-	chr7	-	45391052	45391074
miRNA	mmu-novelmiR-538-3p	chr7	52646395	52646414	-	chr7	-	45391025	45391044
premiRNA	mmu-novelmir-539	chr7	52684156	52684201	-	chr7	-	45428786	45428831
miRNA	mmu-novelmiR-539-3p	chr7	52684156	52684175	-	chr7	-	45428786	45428805
miRNA	mmu-novelmiR-539-5p	chr7	52684178	52684201	-	chr7	-	45428808	45428831
premiRNA	mmu-novelmir-540	chr7	52779056	52779131	-	chr7	-	45523686	45523761
miRNA	mmu-novelmiR-540-5p	chr7	52779109	52779131	-	chr7	-	45523739	45523761
miRNA	mmu-novelmiR-540-3p	chr7	52779056	52779073	-	chr7	-	45523686	45523703
premiRNA	mmu-novelmir-541	chr7	52967602	52967655	-	chr7	-	45712232	45712285
miRNA	mmu-novelmiR-541-5p	chr7	52967633	52967655	-	chr7	-	45712263	45712285
miRNA	mmu-novelmiR-541-3p	chr7	52967602	52967626	-	chr7	-	45712232	45712256
premiRNA	mmu-novelmir-542	chr7	53315327	53315384	+	chr7	+	46059957	46060014
miRNA	mmu-novelmiR-542-5p	chr7	53315327	53315348	+	chr7	+	46059957	46059978
miRNA	mmu-novelmiR-542-3p	chr7	53315363	53315384	+	chr7	+	46059993	46060014
premiRNA	mmu-novelmir-543	chr7	53976718	53976790	-	chr7	-	46721348	46721420
miRNA	mmu-novelmiR-543-5p	chr7	53976772	53976790	-	chr7	-	46721402	46721420
miRNA	mmu-novelmiR-543-3p	chr7	53976718	53976736	-	chr7	-	46721348	46721366
premiRNA	mmu-novelmir-544	chr7	55560250	55560317	+	chr7	+	48304880	48304947
miRNA	mmu-novelmiR-544-3p	chr7	55560297	55560317	+	chr7	+	48304927	48304947
miRNA	mmu-novelmiR-544-5p	chr7	55560250	55560271	+	chr7	+	48304880	48304901
premiRNA	mmu-novelmir-545	chr7	56216904	56216963	+	chr7	+	48961534	48961593
miRNA	mmu-novelmiR-545-3p	chr7	56216941	56216963	+	chr7	+	48961571	48961593
miRNA	mmu-novelmiR-545-5p	chr7	56216904	56216926	+	chr7	+	48961534	48961556
premiRNA	mmu-novelmir-546	chr7	57560571	57560634	+	chr7	+	50305201	50305264
miRNA	mmu-novelmiR-546-3p	chr7	57560617	57560634	+	chr7	+	50305247	50305264
miRNA	mmu-novelmiR-546-5p	chr7	57560571	57560589	+	chr7	+	50305201	50305219
premiRNA	mmu-novelmir-547	chr7	62272917	62272971	+	chr7	+	55017547	55017601
miRNA	mmu-novelmiR-547-5p	chr7	62272917	62272940	+	chr7	+	55017547	55017570
miRNA	mmu-novelmiR-547-3p	chr7	62272951	62272971	+	chr7	+	55017581	55017601
premiRNA	mmu-novelmir-548	chr7	65654625	65654684	+	chr7	+	58399255	58399314
miRNA	mmu-novelmiR-548-3p	chr7	65654663	65654684	+	chr7	+	58399293	58399314
miRNA	mmu-novelmiR-548-5p	chr7	65654625	65654646	+	chr7	+	58399255	58399276
premiRNA	mmu-novelmir-549	chr7	65917756	65917820	+	chr7	+	58662386	58662450
miRNA	mmu-novelmiR-549-3p	chr7	65917797	65917820	+	chr7	+	58662427	58662450
miRNA	mmu-novelmiR-549-5p	chr7	65917756	65917779	+	chr7	+	58662386	58662409
premiRNA	mmu-novelmir-550	chr7	66602707	66602792	-	chr7	-	59347337	59347422
miRNA	mmu-novelmiR-550-3p	chr7	66602707	66602728	-	chr7	-	59347337	59347358
miRNA	mmu-novelmiR-550-5p	chr7	66602769	66602792	-	chr7	-	59347399	59347422
premiRNA	mmu-novelmir-551	chr7	66602984	66603071	-	chr7	-	59347614	59347701
miRNA	mmu-novelmiR-551-5p	chr7	66603051	66603071	-	chr7	-	59347681	59347701
miRNA	mmu-novelmiR-551-3p	chr7	66602984	66603004	-	chr7	-	59347614	59347634
premiRNA	mmu-novelmir-552	chr7	66745864	66745952	-	chr7	-	59490494	59490582
miRNA	mmu-novelmiR-552-5p	chr7	66745931	66745952	-	chr7	-	59490561	59490582
miRNA	mmu-novelmiR-552-3p	chr7	66745864	66745885	-	chr7	-	59490494	59490515
premiRNA	mmu-novelmir-553	chr7	66751472	66751560	-	chr7	-	59496102	59496190
miRNA	mmu-novelmiR-553-5p	chr7	66751539	66751560	-	chr7	-	59496169	59496190
miRNA	mmu-novelmiR-553-3p	chr7	66751472	66751493	-	chr7	-	59496102	59496123
premiRNA	mmu-novelmir-554	chr7	66753344	66753432	-	chr7	-	59497974	59498062
miRNA	mmu-novelmiR-554-5p	chr7	66753411	66753432	-	chr7	-	59498041	59498062
miRNA	mmu-novelmiR-554-3p	chr7	66753344	66753365	-	chr7	-	59497974	59497995
premiRNA	mmu-novelmir-555	chr7	66773715	66773801	-	chr7	-	59518345	59518431
miRNA	mmu-novelmiR-555-5p	chr7	66773781	66773801	-	chr7	-	59518411	59518431
miRNA	mmu-novelmiR-555-3p	chr7	66773715	66773735	-	chr7	-	59518345	59518365
premiRNA	mmu-novelmir-556	chr7	66775587	66775675	-	chr7	-	59520217	59520305
miRNA	mmu-novelmiR-556-5p	chr7	66775654	66775675	-	chr7	-	59520284	59520305
miRNA	mmu-novelmiR-556-3p	chr7	66775587	66775609	-	chr7	-	59520217	59520239
premiRNA	mmu-novelmir-557	chr7	66783074	66783162	-	chr7	-	59527704	59527792
miRNA	mmu-novelmiR-557-5p	chr7	66783141	66783162	-	chr7	-	59527771	59527792
miRNA	mmu-novelmiR-557-3p	chr7	66783074	66783095	-	chr7	-	59527704	59527725
premiRNA	mmu-novelmir-558	chr7	66796173	66796261	-	chr7	-	59540803	59540891
miRNA	mmu-novelmiR-558-5p	chr7	66796240	66796261	-	chr7	-	59540870	59540891
miRNA	mmu-novelmiR-558-3p	chr7	66796173	66796194	-	chr7	-	59540803	59540824
premiRNA	mmu-novelmir-559	chr7	66814902	66814990	-	chr7	-	59559532	59559620
miRNA	mmu-novelmiR-559-5p	chr7	66814969	66814990	-	chr7	-	59559599	59559620
miRNA	mmu-novelmiR-559-3p	chr7	66814902	66814923	-	chr7	-	59559532	59559553
premiRNA	mmu-novelmir-560	chr7	66854208	66854295	-	chr7	-	59598838	59598925
miRNA	mmu-novelmiR-560-5p	chr7	66854274	66854295	-	chr7	-	59598904	59598925
miRNA	mmu-novelmiR-560-3p	chr7	66854208	66854229	-	chr7	-	59598838	59598859
premiRNA	mmu-novelmir-561	chr7	68895354	68895414	-	chr7	-	61750468	61750528
miRNA	mmu-novelmiR-561-3p	chr7	68895354	68895375	-	chr7	-	61750468	61750489
miRNA	mmu-novelmiR-561-5p	chr7	68895389	68895414	-	chr7	-	61750503	61750528
premiRNA	mmu-novelmir-562	chr7	74781012	74781077	-	chr7	-	67636126	67636191
miRNA	mmu-novelmiR-562-5p	chr7	74781054	74781077	-	chr7	-	67636168	67636191
miRNA	mmu-novelmiR-562-3p	chr7	74781012	74781032	-	chr7	-	67636126	67636146
premiRNA	mmu-novelmir-563	chr7	75382510	75382569	+	chr7	+	68237624	68237683
miRNA	mmu-novelmiR-563-5p	chr7	75382510	75382534	+	chr7	+	68237624	68237648
miRNA	mmu-novelmiR-563-3p	chr7	75382542	75382569	+	chr7	+	68237656	68237683
premiRNA	mmu-novelmir-564	chr7	75506594	75506675	+	chr7	+	68361708	68361789
miRNA	mmu-novelmiR-564-3p	chr7	75506655	75506675	+	chr7	+	68361769	68361789
miRNA	mmu-novelmiR-564-5p	chr7	75506594	75506611	+	chr7	+	68361708	68361725
premiRNA	mmu-novelmir-565	chr7	77425297	77425353	+	chr7	+	70280411	70280467
miRNA	mmu-novelmiR-565-5p	chr7	77425297	77425316	+	chr7	+	70280411	70280430
miRNA	mmu-novelmiR-565-3p	chr7	77425331	77425353	+	chr7	+	70280445	70280467
premiRNA	mmu-novelmir-566	chr7	80661041	80661096	-	chr7	-	73516155	73516210
miRNA	mmu-novelmiR-566-5p	chr7	80661074	80661096	-	chr7	-	73516188	73516210
miRNA	mmu-novelmiR-566-3p	chr7	80661041	80661059	-	chr7	-	73516155	73516173
premiRNA	mmu-novelmir-567	chr7	80661652	80661728	-	chr7	-	73516766	73516842
miRNA	mmu-novelmiR-567-5p	chr7	80661706	80661728	-	chr7	-	73516820	73516842
miRNA	mmu-novelmiR-567-3p	chr7	80661652	80661675	-	chr7	-	73516766	73516789
premiRNA	mmu-novelmir-568	chr7	85561341	85561404	-	chr7	-	78416455	78416518
miRNA	mmu-novelmiR-568-3p	chr7	85561341	85561359	-	chr7	-	78416455	78416473
miRNA	mmu-novelmiR-568-5p	chr7	85561385	85561404	-	chr7	-	78416499	78416518
premiRNA	mmu-novelmir-569	chr7	85925933	85925979	-	chr7	-	78781047	78781093
miRNA	mmu-novelmiR-569-5p	chr7	85925962	85925979	-	chr7	-	78781076	78781093
miRNA	mmu-novelmiR-569-3p	chr7	85925933	85925950	-	chr7	-	78781047	78781064
premiRNA	mmu-novelmir-570	chr7	86033179	86033240	-	chr7	-	78888293	78888354
miRNA	mmu-novelmiR-570-5p	chr7	86033219	86033240	-	chr7	-	78888333	78888354
miRNA	mmu-novelmiR-570-3p	chr7	86033179	86033202	-	chr7	-	78888293	78888316
premiRNA	mmu-novelmir-571	chr7	86056579	86056646	+	chr7	+	78911693	78911760
miRNA	mmu-novelmiR-571-5p	chr7	86056579	86056600	+	chr7	+	78911693	78911714
miRNA	mmu-novelmiR-571-3p	chr7	86056624	86056646	+	chr7	+	78911738	78911760
premiRNA	mmu-novelmir-572	chr7	86538870	86538922	+	chr7	+	79393984	79394036
miRNA	mmu-novelmiR-572-5p	chr7	86538870	86538891	+	chr7	+	79393984	79394005
miRNA	mmu-novelmiR-572-3p	chr7	86538902	86538922	+	chr7	+	79394016	79394036
premiRNA	mmu-novelmir-573	chr7	86650165	86650222	-	chr7	-	79505279	79505336
miRNA	mmu-novelmiR-573-5p	chr7	86650201	86650222	-	chr7	-	79505315	79505336
miRNA	mmu-novelmiR-573-3p	chr7	86650165	86650185	-	chr7	-	79505279	79505299
premiRNA	mmu-novelmir-574	chr7	87546142	87546215	+	chr7	+	80401256	80401329
miRNA	mmu-novelmiR-574-3p	chr7	87546197	87546215	+	chr7	+	80401311	80401329
miRNA	mmu-novelmiR-574-5p	chr7	87546142	87546158	+	chr7	+	80401256	80401272
premiRNA	mmu-novelmir-575	chr7	88720678	88720735	+	chr7	+	81575792	81575849
miRNA	mmu-novelmiR-575-3p	chr7	88720714	88720735	+	chr7	+	81575828	81575849
miRNA	mmu-novelmiR-575-5p	chr7	88720678	88720699	+	chr7	+	81575792	81575813
premiRNA	mmu-novelmir-576	chr7	89018546	89018606	+	chr7	+	81873660	81873720
miRNA	mmu-novelmiR-576-5p	chr7	89018546	89018568	+	chr7	+	81873660	81873682
miRNA	mmu-novelmiR-576-3p	chr7	89018586	89018606	+	chr7	+	81873700	81873720
premiRNA	mmu-novelmir-577	chr7	89536236	89536285	+	chr7	+	82387726	82387775
miRNA	mmu-novelmiR-577-5p	chr7	89536236	89536258	+	chr7	+	82387726	82387748
miRNA	mmu-novelmiR-577-3p	chr7	89536263	89536285	+	chr7	+	82387753	82387775
premiRNA	mmu-novelmir-578	chr7	104453290	104453351	-	chr7	-	97304780	97304841
miRNA	mmu-novelmiR-578-5p	chr7	104453328	104453351	-	chr7	-	97304818	97304841
miRNA	mmu-novelmiR-578-3p	chr7	104453290	104453313	-	chr7	-	97304780	97304803
premiRNA	mmu-novelmir-579	chr7	104520585	104520633	+	chr7	+	97372075	97372123
miRNA	mmu-novelmiR-579-3p	chr7	104520611	104520633	+	chr7	+	97372101	97372123
miRNA	mmu-novelmiR-579-5p	chr7	104520585	104520602	+	chr7	+	97372075	97372092
premiRNA	mmu-novelmir-580	chr7	106617463	106617524	+	chr7	+	99468953	99469014
miRNA	mmu-novelmiR-580-3p	chr7	106617503	106617524	+	chr7	+	99468993	99469014
miRNA	mmu-novelmiR-580-5p	chr7	106617463	106617486	+	chr7	+	99468953	99468976
premiRNA	mmu-novelmir-581	chr7	106853391	106853454	-	chr7	-	99704881	99704944
miRNA	mmu-novelmiR-581-5p	chr7	106853433	106853454	-	chr7	-	99704923	99704944
miRNA	mmu-novelmiR-581-3p	chr7	106853391	106853412	-	chr7	-	99704881	99704902
premiRNA	mmu-novelmir-582	chr7	107069491	107069551	-	chr7	-	99920981	99921041
miRNA	mmu-novelmiR-582-5p	chr7	107069530	107069551	-	chr7	-	99921020	99921041
miRNA	mmu-novelmiR-582-3p	chr7	107069491	107069512	-	chr7	-	99920981	99921002
premiRNA	mmu-novelmir-583	chr7	107655240	107655308	+	chr7	+	100506731	100506799
miRNA	mmu-novelmiR-583-5p	chr7	107655240	107655262	+	chr7	+	100506731	100506753
miRNA	mmu-novelmiR-583-3p	chr7	107655288	107655308	+	chr7	+	100506779	100506799
premiRNA	mmu-novelmir-584	chr7	109058853	109058930	+	chr7	+	101910339	101910416
miRNA	mmu-novelmiR-584-3p	chr7	109058908	109058930	+	chr7	+	101910394	101910416
miRNA	mmu-novelmiR-584-5p	chr7	109058853	109058875	+	chr7	+	101910339	101910361
premiRNA	mmu-novelmir-585	chr7	109143915	109143990	+	chr7	+	101995401	101995476
miRNA	mmu-novelmiR-585-3p	chr7	109143968	109143990	+	chr7	+	101995454	101995476
miRNA	mmu-novelmiR-585-5p	chr7	109143915	109143936	+	chr7	+	101995401	101995422
premiRNA	mmu-novelmir-586	chr7	109278454	109278532	-	chr7	-	102129940	102130018
miRNA	mmu-novelmiR-586-3p	chr7	109278454	109278475	-	chr7	-	102129940	102129961
miRNA	mmu-novelmiR-586-5p	chr7	109278511	109278532	-	chr7	-	102129997	102130018
premiRNA	mmu-novelmir-587	chr7	109709188	109709259	-	chr7	-	102560674	102560745
miRNA	mmu-novelmiR-587-5p	chr7	109709236	109709259	-	chr7	-	102560722	102560745
miRNA	mmu-novelmiR-587-3p	chr7	109709188	109709208	-	chr7	-	102560674	102560694
premiRNA	mmu-novelmir-588	chr7	117399286	117399338	+	chr7	+	110255772	110255824
miRNA	mmu-novelmiR-588-5p	chr7	117399286	117399305	+	chr7	+	110255772	110255791
miRNA	mmu-novelmiR-588-3p	chr7	117399317	117399338	+	chr7	+	110255803	110255824
premiRNA	mmu-novelmir-589	chr7	118227578	118227625	+	chr7	+	111084064	111084111
miRNA	mmu-novelmiR-589-3p	chr7	118227606	118227625	+	chr7	+	111084092	111084111
miRNA	mmu-novelmiR-589-5p	chr7	118227578	118227602	+	chr7	+	111084064	111084088
premiRNA	mmu-novelmir-590	chr7	121363094	121363163	-	chr7	-	114219580	114219649
miRNA	mmu-novelmiR-590-5p	chr7	121363139	121363163	-	chr7	-	114219625	114219649
miRNA	mmu-novelmiR-590-3p	chr7	121363094	121363117	-	chr7	-	114219580	114219603
premiRNA	mmu-novelmir-591	chr7	123289684	123289760	-	chr7	-	116146170	116146246
miRNA	mmu-novelmiR-591-3p	chr7	123289684	123289705	-	chr7	-	116146170	116146191
miRNA	mmu-novelmiR-591-5p	chr7	123289741	123289760	-	chr7	-	116146227	116146246
premiRNA	mmu-novelmir-592	chr7	125985551	125985614	-	chr7	-	118842037	118842100
miRNA	mmu-novelmiR-592-3p	chr7	125985551	125985572	-	chr7	-	118842037	118842058
miRNA	mmu-novelmiR-592-5p	chr7	125985594	125985614	-	chr7	-	118842080	118842100
premiRNA	mmu-novelmir-593	chr7	130377361	130377414	-	chr7	-	123233847	123233900
miRNA	mmu-novelmiR-593-3p	chr7	130377361	130377380	-	chr7	-	123233847	123233866
miRNA	mmu-novelmiR-593-5p	chr7	130377390	130377414	-	chr7	-	123233876	123233900
premiRNA	mmu-novelmir-594	chr7	130558844	130558912	+	chr7	+	123415330	123415398
miRNA	mmu-novelmiR-594-5p	chr7	130558844	130558864	+	chr7	+	123415330	123415350
miRNA	mmu-novelmiR-594-3p	chr7	130558890	130558912	+	chr7	+	123415376	123415398
premiRNA	mmu-novelmir-595	chr7	130610052	130610128	+	chr7	+	123466538	123466614
miRNA	mmu-novelmiR-595-5p	chr7	130610052	130610070	+	chr7	+	123466538	123466556
miRNA	mmu-novelmiR-595-3p	chr7	130610106	130610128	+	chr7	+	123466592	123466614
premiRNA	mmu-novelmir-596	chr7	132159792	132159854	-	chr7	-	125016278	125016340
miRNA	mmu-novelmiR-596-3p	chr7	132159792	132159814	-	chr7	-	125016278	125016300
miRNA	mmu-novelmiR-596-5p	chr7	132159833	132159854	-	chr7	-	125016319	125016340
premiRNA	mmu-novelmir-597	chr7	133240903	133240971	-	chr7	-	126097389	126097457
miRNA	mmu-novelmiR-597-5p	chr7	133240950	133240971	-	chr7	-	126097436	126097457
miRNA	mmu-novelmiR-597-3p	chr7	133240903	133240924	-	chr7	-	126097389	126097410
premiRNA	mmu-novelmir-598	chr7	133527994	133528062	-	chr7	-	126384480	126384548
miRNA	mmu-novelmiR-598-3p	chr7	133527994	133528017	-	chr7	-	126384480	126384503
miRNA	mmu-novelmiR-598-5p	chr7	133528041	133528062	-	chr7	-	126384527	126384548
premiRNA	mmu-novelmir-599	chr7	133636891	133636977	-	chr7	-	126493377	126493463
miRNA	mmu-novelmiR-599-5p	chr7	133636956	133636977	-	chr7	-	126493442	126493463
miRNA	mmu-novelmiR-599-3p	chr7	133636891	133636913	-	chr7	-	126493377	126493399
premiRNA	mmu-novelmir-600	chr7	133723820	133723887	-	chr7	-	126580306	126580373
miRNA	mmu-novelmiR-600-5p	chr7	133723864	133723887	-	chr7	-	126580350	126580373
miRNA	mmu-novelmiR-600-3p	chr7	133723820	133723841	-	chr7	-	126580306	126580327
premiRNA	mmu-novelmir-601	chr7	134351203	134351255	-	chr7	-	127207689	127207741
miRNA	mmu-novelmiR-601-3p	chr7	134351203	134351224	-	chr7	-	127207689	127207710
miRNA	mmu-novelmiR-601-5p	chr7	134351232	134351255	-	chr7	-	127207718	127207741
premiRNA	mmu-novelmir-602	chr7	134376661	134376740	-	chr7	-	127233147	127233226
miRNA	mmu-novelmiR-602-3p	chr7	134376661	134376682	-	chr7	-	127233147	127233168
miRNA	mmu-novelmiR-602-5p	chr7	134376717	134376740	-	chr7	-	127233203	127233226
premiRNA	mmu-novelmir-603	chr7	134476670	134476726	+	chr7	+	127333156	127333212
miRNA	mmu-novelmiR-603-3p	chr7	134476702	134476726	+	chr7	+	127333188	127333212
miRNA	mmu-novelmiR-603-5p	chr7	134476670	134476689	+	chr7	+	127333156	127333175
premiRNA	mmu-novelmir-604	chr7	134705123	134705197	+	chr7	+	127561609	127561683
miRNA	mmu-novelmiR-604-5p	chr7	134705123	134705147	+	chr7	+	127561609	127561633
miRNA	mmu-novelmiR-604-3p	chr7	134705179	134705197	+	chr7	+	127561665	127561683
premiRNA	mmu-novelmir-605	chr7	134890290	134890355	+	chr7	+	127746776	127746841
miRNA	mmu-novelmiR-605-3p	chr7	134890335	134890355	+	chr7	+	127746821	127746841
miRNA	mmu-novelmiR-605-5p	chr7	134890290	134890311	+	chr7	+	127746776	127746797
premiRNA	mmu-novelmir-606	chr7	139442800	139442841	-	chr7	-	132251117	132251158
miRNA	mmu-novelmiR-606-5p	chr7	139442821	139442841	-	chr7	-	132251138	132251158
miRNA	mmu-novelmiR-606-3p	chr7	139442800	139442819	-	chr7	-	132251117	132251136
premiRNA	mmu-novelmir-607	chr7	139523238	139523294	+	chr7	+	132331555	132331611
miRNA	mmu-novelmiR-607-3p	chr7	139523273	139523294	+	chr7	+	132331590	132331611
miRNA	mmu-novelmiR-607-5p	chr7	139523238	139523258	+	chr7	+	132331555	132331575
premiRNA	mmu-novelmir-608	chr7	139757680	139757736	-	chr7	-	132565997	132566053
miRNA	mmu-novelmiR-608-5p	chr7	139757714	139757736	-	chr7	-	132566031	132566053
miRNA	mmu-novelmiR-608-3p	chr7	139757680	139757701	-	chr7	-	132565997	132566018
premiRNA	mmu-novelmir-609	chr7	140245469	140245554	-	chr7	-	133053786	133053871
miRNA	mmu-novelmiR-609-5p	chr7	140245532	140245554	-	chr7	-	133053849	133053871
miRNA	mmu-novelmiR-609-3p	chr7	140245469	140245494	-	chr7	-	133053786	133053811
premiRNA	mmu-novelmir-610	chr7	144500173	144500228	-	chr7	-	137308490	137308545
miRNA	mmu-novelmiR-610-3p	chr7	144500173	144500194	-	chr7	-	137308490	137308511
miRNA	mmu-novelmiR-610-5p	chr7	144500207	144500228	-	chr7	-	137308524	137308545
premiRNA	mmu-novelmir-611	chr7	144602332	144602395	-	chr7	-	137410649	137410712
miRNA	mmu-novelmiR-611-5p	chr7	144602371	144602395	-	chr7	-	137410688	137410712
miRNA	mmu-novelmiR-611-3p	chr7	144602332	144602355	-	chr7	-	137410649	137410672
premiRNA	mmu-novelmir-612	chr7	146440602	146440667	+	chr7	+	139254703	139254768
miRNA	mmu-novelmiR-612-3p	chr7	146440645	146440667	+	chr7	+	139254746	139254768
miRNA	mmu-novelmiR-612-5p	chr7	146440602	146440622	+	chr7	+	139254703	139254723
premiRNA	mmu-novelmir-613	chr7	146729203	146729258	+	chr7	+	139543304	139543359
miRNA	mmu-novelmiR-613-3p	chr7	146729238	146729258	+	chr7	+	139543339	139543359
miRNA	mmu-novelmiR-613-5p	chr7	146729203	146729223	+	chr7	+	139543304	139543324
premiRNA	mmu-novelmir-614	chr7	148044777	148044858	+	chr7	+	140858878	140858959
miRNA	mmu-novelmiR-614-5p	chr7	148044777	148044796	+	chr7	+	140858878	140858897
miRNA	mmu-novelmiR-614-3p	chr7	148044844	148044858	+	chr7	+	140858945	140858959
premiRNA	mmu-novelmir-615	chr7	148246959	148247004	+	chr7	+	141061060	141061105
miRNA	mmu-novelmiR-615-3p	chr7	148246983	148247004	+	chr7	+	141061084	141061105
miRNA	mmu-novelmiR-615-5p	chr7	148246959	148246979	+	chr7	+	141061060	141061080
premiRNA	mmu-novelmir-616	chr7	148568957	148569035	-	chr7	-	141383058	141383136
miRNA	mmu-novelmiR-616-3p	chr7	148568957	148568979	-	chr7	-	141383058	141383080
miRNA	mmu-novelmiR-616-5p	chr7	148569012	148569035	-	chr7	-	141383113	141383136
premiRNA	mmu-novelmir-617	chr7	149388044	149388106	+	chr7	+	142202139	142202201
miRNA	mmu-novelmiR-617-3p	chr7	149388089	149388106	+	chr7	+	142202184	142202201
miRNA	mmu-novelmiR-617-5p	chr7	149388044	149388062	+	chr7	+	142202139	142202157
premiRNA	mmu-novelmir-618	chr7	149685108	149685179	+	chr7	+	142499203	142499274
miRNA	mmu-novelmiR-618-3p	chr7	149685157	149685179	+	chr7	+	142499252	142499274
miRNA	mmu-novelmiR-618-5p	chr7	149685108	149685128	+	chr7	+	142499203	142499223
premiRNA	mmu-novelmir-619	chr7	149762191	149762258	-	chr7	-	142576286	142576353
miRNA	mmu-novelmiR-619-5p	chr7	149762237	149762258	-	chr7	-	142576332	142576353
miRNA	mmu-novelmiR-619-3p	chr7	149762191	149762215	-	chr7	-	142576286	142576310
premiRNA	mmu-novelmir-620	chr7	150192557	150192628	+	chr7	+	143006652	143006723
miRNA	mmu-novelmiR-620-3p	chr7	150192607	150192628	+	chr7	+	143006702	143006723
miRNA	mmu-novelmiR-620-5p	chr7	150192557	150192578	+	chr7	+	143006652	143006673
premiRNA	mmu-novelmir-621	chr7	150443809	150443885	-	chr7	-	143257904	143257980
miRNA	mmu-novelmiR-621-5p	chr7	150443864	150443885	-	chr7	-	143257959	143257980
miRNA	mmu-novelmiR-621-3p	chr7	150443809	150443832	-	chr7	-	143257904	143257927
premiRNA	mmu-novelmir-622	chr7	150735521	150735570	+	chr7	+	143549616	143549665
miRNA	mmu-novelmiR-622-5p	chr7	150735521	150735544	+	chr7	+	143549616	143549639
miRNA	mmu-novelmiR-622-3p	chr7	150735548	150735570	+	chr7	+	143549643	143549665
premiRNA	mmu-novelmir-623	chr7	151689995	151690054	-	chr7	-	144504090	144504149
miRNA	mmu-novelmiR-623-5p	chr7	151690033	151690054	-	chr7	-	144504128	144504149
miRNA	mmu-novelmiR-623-3p	chr7	151689995	151690016	-	chr7	-	144504090	144504111
premiRNA	mmu-novelmir-624	chr7	151766863	151766905	-	chr7	-	144580958	144581000
miRNA	mmu-novelmiR-624-3p	chr7	151766863	151766884	-	chr7	-	144580958	144580979
miRNA	mmu-novelmiR-624-5p	chr7	151766886	151766905	-	chr7	-	144580981	144581000
premiRNA	mmu-novelmir-625	chr8	3567757	3567813	-	chr8	-	3567757	3567813
miRNA	mmu-novelmiR-625-3p	chr8	3567757	3567777	-	chr8	-	3567757	3567777
miRNA	mmu-novelmiR-625-5p	chr8	3567791	3567813	-	chr8	-	3567791	3567813
premiRNA	mmu-novelmir-626	chr8	4678564	4678620	-	chr8	-	4678564	4678620
miRNA	mmu-novelmiR-626-3p	chr8	4678564	4678581	-	chr8	-	4678564	4678581
miRNA	mmu-novelmiR-626-5p	chr8	4678600	4678620	-	chr8	-	4678600	4678620
premiRNA	mmu-novelmir-627	chr8	11510248	11510301	+	chr8	+	11510248	11510301
miRNA	mmu-novelmiR-627-5p	chr8	11510248	11510265	+	chr8	+	11510248	11510265
miRNA	mmu-novelmiR-627-3p	chr8	11510282	11510301	+	chr8	+	11510282	11510301
premiRNA	mmu-novelmir-628	chr8	11732459	11732520	+	chr8	+	11732459	11732520
miRNA	mmu-novelmiR-628-3p	chr8	11732498	11732520	+	chr8	+	11732498	11732520
miRNA	mmu-novelmiR-628-5p	chr8	11732459	11732483	+	chr8	+	11732459	11732483
premiRNA	mmu-novelmir-629	chr8	11833564	11833633	+	chr8	+	11833564	11833633
miRNA	mmu-novelmiR-629-3p	chr8	11833611	11833633	+	chr8	+	11833611	11833633
miRNA	mmu-novelmiR-629-5p	chr8	11833564	11833584	+	chr8	+	11833564	11833584
premiRNA	mmu-novelmir-630	chr8	12880715	12880777	+	chr8	+	12880715	12880777
miRNA	mmu-novelmiR-630-5p	chr8	12880715	12880736	+	chr8	+	12880715	12880736
miRNA	mmu-novelmiR-630-3p	chr8	12880756	12880777	+	chr8	+	12880756	12880777
premiRNA	mmu-novelmir-631	chr8	14379117	14379173	-	chr8	-	14379117	14379173
miRNA	mmu-novelmiR-631-3p	chr8	14379117	14379138	-	chr8	-	14379117	14379138
miRNA	mmu-novelmiR-631-5p	chr8	14379152	14379173	-	chr8	-	14379152	14379173
premiRNA	mmu-novelmir-632	chr8	19180664	19180729	+	chr8	+	19180664	19180729
miRNA	mmu-novelmiR-632-3p	chr8	19180711	19180729	+	chr8	+	19180711	19180729
miRNA	mmu-novelmiR-632-5p	chr8	19180664	19180683	+	chr8	+	19180664	19180683
premiRNA	mmu-novelmir-633	chr8	19493086	19493175	+	chr8	+	19493086	19493175
miRNA	mmu-novelmiR-633-5p	chr8	19493086	19493106	+	chr8	+	19493086	19493106
miRNA	mmu-novelmiR-633-3p	chr8	19493153	19493175	+	chr8	+	19493153	19493175
premiRNA	mmu-novelmir-634	chr8	22235305	22235366	-	chr8	-	21095626	21095687
miRNA	mmu-novelmiR-634-3p	chr8	22235305	22235325	-	chr8	-	21095626	21095646
miRNA	mmu-novelmiR-634-5p	chr8	22235348	22235366	-	chr8	-	21095669	21095687
premiRNA	mmu-novelmir-635	chr8	23779467	23779535	-	chr8	-	22668995	22669063
miRNA	mmu-novelmiR-635-5p	chr8	23779512	23779535	-	chr8	-	22669040	22669063
miRNA	mmu-novelmiR-635-3p	chr8	23779467	23779493	-	chr8	-	22668995	22669021
premiRNA	mmu-novelmir-636	chr8	34556308	34556349	-	chr8	-	33445836	33445877
miRNA	mmu-novelmiR-636-5p	chr8	34556330	34556349	-	chr8	-	33445858	33445877
miRNA	mmu-novelmiR-636-3p	chr8	34556308	34556325	-	chr8	-	33445836	33445853
premiRNA	mmu-novelmir-637	chr8	34752950	34753002	+	chr8	+	33642478	33642530
miRNA	mmu-novelmiR-637-5p	chr8	34752950	34752971	+	chr8	+	33642478	33642499
miRNA	mmu-novelmiR-637-3p	chr8	34752982	34753002	+	chr8	+	33642510	33642530
premiRNA	mmu-novelmir-638	chr8	36066410	36066474	+	chr8	+	35003356	35003420
miRNA	mmu-novelmiR-638-5p	chr8	36066410	36066431	+	chr8	+	35003356	35003377
miRNA	mmu-novelmiR-638-3p	chr8	36066452	36066474	+	chr8	+	35003398	35003420
premiRNA	mmu-novelmir-639	chr8	47295870	47295938	-	chr8	-	46210516	46210584
miRNA	mmu-novelmiR-639-3p	chr8	47295870	47295892	-	chr8	-	46210516	46210538
miRNA	mmu-novelmiR-639-5p	chr8	47295919	47295938	-	chr8	-	46210565	46210584
premiRNA	mmu-novelmir-640	chr8	49076001	49076059	-	chr8	-	47990647	47990705
miRNA	mmu-novelmiR-640-3p	chr8	49076001	49076024	-	chr8	-	47990647	47990670
miRNA	mmu-novelmiR-640-5p	chr8	49076035	49076059	-	chr8	-	47990681	47990705
premiRNA	mmu-novelmir-641	chr8	66925287	66925349	+	chr8	+	64446490	64446552
miRNA	mmu-novelmiR-641-5p	chr8	66925287	66925309	+	chr8	+	64446490	64446512
miRNA	mmu-novelmiR-641-3p	chr8	66925326	66925349	+	chr8	+	64446529	64446552
premiRNA	mmu-novelmir-642	chr8	67375372	67375435	+	chr8	+	64851474	64851537
miRNA	mmu-novelmiR-642-3p	chr8	67375413	67375435	+	chr8	+	64851515	64851537
miRNA	mmu-novelmiR-642-5p	chr8	67375372	67375394	+	chr8	+	64851474	64851496
premiRNA	mmu-novelmir-643	chr8	71699064	71699124	-	chr8	-	69175165	69175225
miRNA	mmu-novelmiR-643-3p	chr8	71699064	71699087	-	chr8	-	69175165	69175188
miRNA	mmu-novelmiR-643-5p	chr8	71699102	71699124	-	chr8	-	69175203	69175225
premiRNA	mmu-novelmir-644	chr8	71849972	71850026	-	chr8	-	69326073	69326127
miRNA	mmu-novelmiR-644-3p	chr8	71849972	71849993	-	chr8	-	69326073	69326094
miRNA	mmu-novelmiR-644-5p	chr8	71850005	71850026	-	chr8	-	69326106	69326127
premiRNA	mmu-novelmir-645	chr8	72441788	72441837	-	chr8	-	69917889	69917938
miRNA	mmu-novelmiR-645-5p	chr8	72441814	72441837	-	chr8	-	69917915	69917938
miRNA	mmu-novelmiR-645-3p	chr8	72441788	72441810	-	chr8	-	69917889	69917911
premiRNA	mmu-novelmir-646	chr8	72862420	72862497	-	chr8	-	70338521	70338598
miRNA	mmu-novelmiR-646-3p	chr8	72862420	72862439	-	chr8	-	70338521	70338540
miRNA	mmu-novelmiR-646-5p	chr8	72862477	72862497	-	chr8	-	70338578	70338598
premiRNA	mmu-novelmir-647	chr8	72906571	72906633	-	chr8	-	70382672	70382734
miRNA	mmu-novelmiR-647-3p	chr8	72906571	72906593	-	chr8	-	70382672	70382694
miRNA	mmu-novelmiR-647-5p	chr8	72906610	72906633	-	chr8	-	70382711	70382734
premiRNA	mmu-novelmir-648	chr8	73042415	73042471	-	chr8	-	70518516	70518572
miRNA	mmu-novelmiR-648-5p	chr8	73042448	73042471	-	chr8	-	70518549	70518572
miRNA	mmu-novelmiR-648-3p	chr8	73042415	73042436	-	chr8	-	70518516	70518537
premiRNA	mmu-novelmir-649	chr8	73120000	73120042	+	chr8	+	70596101	70596143
miRNA	mmu-novelmiR-649-3p	chr8	73120023	73120042	+	chr8	+	70596124	70596143
miRNA	mmu-novelmiR-649-5p	chr8	73120000	73120022	+	chr8	+	70596101	70596123
premiRNA	mmu-novelmir-650	chr8	73225747	73225805	+	chr8	+	70701848	70701906
miRNA	mmu-novelmiR-650-3p	chr8	73225784	73225805	+	chr8	+	70701885	70701906
miRNA	mmu-novelmiR-650-5p	chr8	73225747	73225766	+	chr8	+	70701848	70701867
premiRNA	mmu-novelmir-651	chr8	73276558	73276647	-	chr8	-	70752659	70752748
miRNA	mmu-novelmiR-651-3p	chr8	73276558	73276580	-	chr8	-	70752659	70752681
miRNA	mmu-novelmiR-651-5p	chr8	73276630	73276647	-	chr8	-	70752731	70752748
premiRNA	mmu-novelmir-652	chr8	73293132	73293190	-	chr8	-	70769233	70769291
miRNA	mmu-novelmiR-652-5p	chr8	73293169	73293190	-	chr8	-	70769270	70769291
miRNA	mmu-novelmiR-652-3p	chr8	73293132	73293151	-	chr8	-	70769233	70769252
premiRNA	mmu-novelmir-653	chr8	73304575	73304634	-	chr8	-	70780676	70780735
miRNA	mmu-novelmiR-653-5p	chr8	73304611	73304634	-	chr8	-	70780712	70780735
miRNA	mmu-novelmiR-653-3p	chr8	73304575	73304596	-	chr8	-	70780676	70780697
premiRNA	mmu-novelmir-654	chr8	73876387	73876474	+	chr8	+	71352488	71352575
miRNA	mmu-novelmiR-654-5p	chr8	73876387	73876410	+	chr8	+	71352488	71352511
miRNA	mmu-novelmiR-654-3p	chr8	73876454	73876474	+	chr8	+	71352555	71352575
premiRNA	mmu-novelmir-655	chr8	74118022	74118070	+	chr8	+	71594123	71594171
miRNA	mmu-novelmiR-655-3p	chr8	74118052	74118070	+	chr8	+	71594153	71594171
miRNA	mmu-novelmiR-655-5p	chr8	74118022	74118042	+	chr8	+	71594123	71594143
premiRNA	mmu-novelmir-656	chr8	75072404	75072460	+	chr8	+	72548505	72548561
miRNA	mmu-novelmiR-656-3p	chr8	75072439	75072460	+	chr8	+	72548540	72548561
miRNA	mmu-novelmiR-656-5p	chr8	75072404	75072424	+	chr8	+	72548505	72548525
premiRNA	mmu-novelmir-657	chr8	75226870	75226926	+	chr8	+	72702971	72703027
miRNA	mmu-novelmiR-657-3p	chr8	75226906	75226926	+	chr8	+	72703007	72703027
miRNA	mmu-novelmiR-657-5p	chr8	75226870	75226891	+	chr8	+	72702971	72702992
premiRNA	mmu-novelmir-658	chr8	76781518	76781580	-	chr8	-	74257619	74257681
miRNA	mmu-novelmiR-658-3p	chr8	76781518	76781538	-	chr8	-	74257619	74257639
miRNA	mmu-novelmiR-658-5p	chr8	76781556	76781580	-	chr8	-	74257657	74257681
premiRNA	mmu-novelmir-659	chr8	77554660	77554737	+	chr8	+	75030761	75030838
miRNA	mmu-novelmiR-659-3p	chr8	77554717	77554737	+	chr8	+	75030818	75030838
miRNA	mmu-novelmiR-659-5p	chr8	77554660	77554681	+	chr8	+	75030761	75030782
premiRNA	mmu-novelmir-660	chr8	80022359	80022435	-	chr8	-	77498460	77498536
miRNA	mmu-novelmiR-660-5p	chr8	80022411	80022435	-	chr8	-	77498512	77498536
miRNA	mmu-novelmiR-660-3p	chr8	80022359	80022386	-	chr8	-	77498460	77498487
premiRNA	mmu-novelmir-661	chr8	81668742	81668796	+	chr8	+	79144843	79144897
miRNA	mmu-novelmiR-661-5p	chr8	81668742	81668762	+	chr8	+	79144843	79144863
miRNA	mmu-novelmiR-661-3p	chr8	81668776	81668796	+	chr8	+	79144877	79144897
premiRNA	mmu-novelmir-662	chr8	86421203	86421257	-	chr8	-	83897304	83897358
miRNA	mmu-novelmiR-662-5p	chr8	86421237	86421257	-	chr8	-	83897338	83897358
miRNA	mmu-novelmiR-662-3p	chr8	86421203	86421220	-	chr8	-	83897304	83897321
premiRNA	mmu-novelmir-663	chr8	86658496	86658560	-	chr8	-	84134597	84134661
miRNA	mmu-novelmiR-663-3p	chr8	86658496	86658520	-	chr8	-	84134597	84134621
miRNA	mmu-novelmiR-663-5p	chr8	86658540	86658560	-	chr8	-	84134641	84134661
premiRNA	mmu-novelmir-664	chr8	86726111	86726192	+	chr8	+	84202212	84202293
miRNA	mmu-novelmiR-664-3p	chr8	86726171	86726192	+	chr8	+	84202272	84202293
miRNA	mmu-novelmiR-664-5p	chr8	86726111	86726135	+	chr8	+	84202212	84202236
premiRNA	mmu-novelmir-665	chr8	86736501	86736569	-	chr8	-	84212602	84212670
miRNA	mmu-novelmiR-665-3p	chr8	86736501	86736521	-	chr8	-	84212602	84212622
miRNA	mmu-novelmiR-665-5p	chr8	86736550	86736569	-	chr8	-	84212651	84212670
premiRNA	mmu-novelmir-666	chr8	86784587	86784641	-	chr8	-	84260688	84260742
miRNA	mmu-novelmiR-666-5p	chr8	86784619	86784641	-	chr8	-	84260720	84260742
miRNA	mmu-novelmiR-666-3p	chr8	86784587	86784608	-	chr8	-	84260688	84260709
[truncated: 2,334 more rows]

## Sheet: TableS10c
Candidate novel miRNAs in rat
Type	Name	Chromosome (rn6)	Start (rn6)	End (rn6)	Strand (rn6)
premiRNA	rno-novelmir-1	chr1	21852187	21852246	-
miRNA	rno-novelmiR-1-3p	chr1	21852187	21852209	-
miRNA	rno-novelmiR-1-5p	chr1	21852224	21852246	-
premiRNA	rno-novelmir-2	chr1	88011297	88011356	-
miRNA	rno-novelmiR-2-5p	chr1	88011336	88011356	-
miRNA	rno-novelmiR-2-3p	chr1	88011297	88011318	-
premiRNA	rno-novelmir-3	chr1	137041237	137041299	+
miRNA	rno-novelmiR-3-3p	chr1	137041277	137041299	+
miRNA	rno-novelmiR-3-5p	chr1	137041237	137041259	+
premiRNA	rno-novelmir-4	chr1	142269834	142269892	-
miRNA	rno-novelmiR-4-5p	chr1	142269870	142269892	-
miRNA	rno-novelmiR-4-3p	chr1	142269834	142269853	-
premiRNA	rno-novelmir-5	chr1	263698684	263698759	+
miRNA	rno-novelmiR-5-5p	chr1	263698684	263698706	+
miRNA	rno-novelmiR-5-3p	chr1	263698737	263698759	+
premiRNA	rno-novelmir-6	chr10	52244131	52244208	-
miRNA	rno-novelmiR-6-5p	chr10	52244188	52244208	-
miRNA	rno-novelmiR-6-3p	chr10	52244131	52244151	-
premiRNA	rno-novelmir-7	chr10	62659801	62659865	-
miRNA	rno-novelmiR-7-5p	chr10	62659844	62659865	-
miRNA	rno-novelmiR-7-3p	chr10	62659801	62659823	-
premiRNA	rno-novelmir-8	chr10	65442058	65442118	-
miRNA	rno-novelmiR-8-3p	chr10	65442058	65442078	-
miRNA	rno-novelmiR-8-5p	chr10	65442096	65442118	-
premiRNA	rno-novelmir-9	chr10	65769413	65769492	+
miRNA	rno-novelmiR-9-3p	chr10	65769471	65769492	+
miRNA	rno-novelmiR-9-5p	chr10	65769413	65769435	+
premiRNA	rno-novelmir-10	chr10	70341845	70341897	-
miRNA	rno-novelmiR-10-3p	chr10	70341845	70341866	-
miRNA	rno-novelmiR-10-5p	chr10	70341876	70341897	-
premiRNA	rno-novelmir-11	chr11	32951116	32951174	+
miRNA	rno-novelmiR-11-3p	chr11	32951153	32951174	+
miRNA	rno-novelmiR-11-5p	chr11	32951116	32951138	+
premiRNA	rno-novelmir-12	chr11	44258388	44258449	-
miRNA	rno-novelmiR-12-5p	chr11	44258428	44258449	-
miRNA	rno-novelmiR-12-3p	chr11	44258388	44258409	-
premiRNA	rno-novelmir-13	chr11	47269415	47269469	+
miRNA	rno-novelmiR-13-3p	chr11	47269448	47269469	+
miRNA	rno-novelmiR-13-5p	chr11	47269415	47269436	+
premiRNA	rno-novelmir-14	chr12	37471862	37471920	-
miRNA	rno-novelmiR-14-3p	chr12	37471862	37471884	-
miRNA	rno-novelmiR-14-5p	chr12	37471901	37471920	-
premiRNA	rno-novelmir-15	chr13	103250863	103250925	+
miRNA	rno-novelmiR-15-5p	chr13	103250863	103250884	+
miRNA	rno-novelmiR-15-3p	chr13	103250904	103250925	+
premiRNA	rno-novelmir-16	chr14	36665071	36665133	-
miRNA	rno-novelmiR-16-3p	chr14	36665071	36665095	-
miRNA	rno-novelmiR-16-5p	chr14	36665110	36665133	-
premiRNA	rno-novelmir-17	chr14	47315977	47316029	+
miRNA	rno-novelmiR-17-3p	chr14	47316009	47316029	+
miRNA	rno-novelmiR-17-5p	chr14	47315977	47315999	+
premiRNA	rno-novelmir-18	chr14	85331957	85332012	-
miRNA	rno-novelmiR-18-5p	chr14	85331990	85332012	-
miRNA	rno-novelmiR-18-3p	chr14	85331957	85331979	-
premiRNA	rno-novelmir-19	chr15	30097803	30097873	+
miRNA	rno-novelmiR-19-5p	chr15	30097803	30097822	+
miRNA	rno-novelmiR-19-3p	chr15	30097851	30097873	+
premiRNA	rno-novelmir-20	chr15	41961044	41961108	-
miRNA	rno-novelmiR-20-3p	chr15	41961044	41961066	-
miRNA	rno-novelmiR-20-5p	chr15	41961086	41961108	-
premiRNA	rno-novelmir-21	chr16	20292982	20293044	-
miRNA	rno-novelmiR-21-3p	chr16	20292982	20293005	-
miRNA	rno-novelmiR-21-5p	chr16	20293021	20293044	-
premiRNA	rno-novelmir-22	chr16	21322483	21322538	-
miRNA	rno-novelmiR-22-5p	chr16	21322517	21322538	-
miRNA	rno-novelmiR-22-3p	chr16	21322483	21322503	-
premiRNA	rno-novelmir-23	chr17	10456155	10456219	-
miRNA	rno-novelmiR-23-5p	chr17	10456197	10456219	-
miRNA	rno-novelmiR-23-3p	chr17	10456155	10456176	-
premiRNA	rno-novelmir-24	chr17	10572276	10572334	-
miRNA	rno-novelmiR-24-5p	chr17	10572313	10572334	-
miRNA	rno-novelmiR-24-3p	chr17	10572276	10572298	-
premiRNA	rno-novelmir-25	chr17	71775528	71775587	-
miRNA	rno-novelmiR-25-5p	chr17	71775566	71775587	-
miRNA	rno-novelmiR-25-3p	chr17	71775528	71775549	-
premiRNA	rno-novelmir-26	chr17	71776755	71776817	-
miRNA	rno-novelmiR-26-3p	chr17	71776755	71776777	-
miRNA	rno-novelmiR-26-5p	chr17	71776796	71776817	-
premiRNA	rno-novelmir-27	chr17	71781156	71781216	-
miRNA	rno-novelmiR-27-5p	chr17	71781195	71781216	-
miRNA	rno-novelmiR-27-3p	chr17	71781156	71781178	-
premiRNA	rno-novelmir-28	chr17	71783925	71783984	-
miRNA	rno-novelmiR-28-5p	chr17	71783963	71783984	-
miRNA	rno-novelmiR-28-3p	chr17	71783925	71783944	-
premiRNA	rno-novelmir-29	chr17	71786644	71786700	-
miRNA	rno-novelmiR-29-3p	chr17	71786644	71786665	-
miRNA	rno-novelmiR-29-5p	chr17	71786678	71786700	-
premiRNA	rno-novelmir-30	chr17	71792357	71792417	-
miRNA	rno-novelmiR-30-5p	chr17	71792396	71792417	-
miRNA	rno-novelmiR-30-3p	chr17	71792357	71792379	-
premiRNA	rno-novelmir-31	chr17	71793183	71793244	-
miRNA	rno-novelmiR-31-3p	chr17	71793183	71793204	-
miRNA	rno-novelmiR-31-5p	chr17	71793223	71793244	-
premiRNA	rno-novelmir-32	chr17	71800891	71800959	-
miRNA	rno-novelmiR-32-5p	chr17	71800938	71800959	-
miRNA	rno-novelmiR-32-3p	chr17	71800891	71800915	-
premiRNA	rno-novelmir-33	chr17	71802321	71802380	-
miRNA	rno-novelmiR-33-5p	chr17	71802359	71802380	-
miRNA	rno-novelmiR-33-3p	chr17	71802321	71802343	-
premiRNA	rno-novelmir-34	chr17	71802541	71802607	-
miRNA	rno-novelmiR-34-5p	chr17	71802586	71802607	-
miRNA	rno-novelmiR-34-3p	chr17	71802541	71802563	-
premiRNA	rno-novelmir-35	chr17	71803986	71804046	-
miRNA	rno-novelmiR-35-5p	chr17	71804025	71804046	-
miRNA	rno-novelmiR-35-3p	chr17	71803986	71804009	-
premiRNA	rno-novelmir-36	chr17	71805882	71805940	-
miRNA	rno-novelmiR-36-5p	chr17	71805919	71805940	-
miRNA	rno-novelmiR-36-3p	chr17	71805882	71805903	-
premiRNA	rno-novelmir-37	chr17	72059860	72059932	-
miRNA	rno-novelmiR-37-5p	chr17	72059911	72059932	-
miRNA	rno-novelmiR-37-3p	chr17	72059860	72059882	-
premiRNA	rno-novelmir-38	chr17	72061478	72061538	-
miRNA	rno-novelmiR-38-5p	chr17	72061517	72061538	-
miRNA	rno-novelmiR-38-3p	chr17	72061478	72061500	-
premiRNA	rno-novelmir-39	chr17	72062782	72062838	-
miRNA	rno-novelmiR-39-3p	chr17	72062782	72062804	-
miRNA	rno-novelmiR-39-5p	chr17	72062816	72062838	-
premiRNA	rno-novelmir-40	chr17	72063369	72063429	-
miRNA	rno-novelmiR-40-5p	chr17	72063408	72063429	-
miRNA	rno-novelmiR-40-3p	chr17	72063369	72063391	-
premiRNA	rno-novelmir-41	chr17	89894875	89894935	-
miRNA	rno-novelmiR-41-3p	chr17	89894875	89894897	-
miRNA	rno-novelmiR-41-5p	chr17	89894913	89894935	-
premiRNA	rno-novelmir-42	chr18	51196695	51196765	+
miRNA	rno-novelmiR-42-5p	chr18	51196695	51196714	+
miRNA	rno-novelmiR-42-3p	chr18	51196743	51196765	+
premiRNA	rno-novelmir-43	chr20	3339878	3339944	-
miRNA	rno-novelmiR-43-3p	chr20	3339878	3339899	-
miRNA	rno-novelmiR-43-5p	chr20	3339922	3339944	-
premiRNA	rno-novelmir-44	chr20	5848894	5848958	-
miRNA	rno-novelmiR-44-5p	chr20	5848937	5848958	-
miRNA	rno-novelmiR-44-3p	chr20	5848894	5848915	-
premiRNA	rno-novelmir-45	chr20	6646960	6647018	-
miRNA	rno-novelmiR-45-3p	chr20	6646960	6646984	-
miRNA	rno-novelmiR-45-5p	chr20	6646994	6647018	-
premiRNA	rno-novelmir-46	chr20	6662144	6662231	+
miRNA	rno-novelmiR-46-5p	chr20	6662144	6662168	+
miRNA	rno-novelmiR-46-3p	chr20	6662209	6662231	+
premiRNA	rno-novelmir-47	chr20	12551891	12551950	+
miRNA	rno-novelmiR-47-3p	chr20	12551929	12551950	+
miRNA	rno-novelmiR-47-5p	chr20	12551891	12551911	+
premiRNA	rno-novelmir-48	chr20	14090975	14091030	-
miRNA	rno-novelmiR-48-3p	chr20	14090975	14090996	-
miRNA	rno-novelmiR-48-5p	chr20	14091008	14091030	-
premiRNA	rno-novelmir-49	chrX	33516114	33516172	-
miRNA	rno-novelmiR-49-5p	chrX	33516151	33516172	-
miRNA	rno-novelmiR-49-3p	chrX	33516114	33516136	-
premiRNA	rno-novelmir-50	chrX	38020538	38020601	-
miRNA	rno-novelmiR-50-3p	chrX	38020538	38020559	-
miRNA	rno-novelmiR-50-5p	chrX	38020580	38020601	-
premiRNA	rno-novelmir-51	chrX	152224740	152224802	-
miRNA	rno-novelmiR-51-5p	chrX	152224779	152224802	-
miRNA	rno-novelmiR-51-3p	chrX	152224740	152224763	-
premiRNA	rno-novelmir-52	chrX	155330268	155330324	+
miRNA	rno-novelmiR-52-3p	chrX	155330304	155330324	+
miRNA	rno-novelmiR-52-5p	chrX	155330268	155330287	+

## Sheet: TableS10d
Candidate novel miRNAs in dog
Type	Name	Chromosome (canFam3)	Start (canFam3)	End (canFam3)	Strand (canFam3)
premiRNA	cfa-novelmir-1	chr1	25838385	25838453	+
miRNA	cfa-novelmiR-1-5p	chr1	25838385	25838405	+
miRNA	cfa-novelmiR-1-3p	chr1	25838435	25838453	+
premiRNA	cfa-novelmir-2	chr1	99047236	99047303	+
miRNA	cfa-novelmiR-2-3p	chr1	99047283	99047303	+
miRNA	cfa-novelmiR-2-5p	chr1	99047236	99047257	+
premiRNA	cfa-novelmir-3	chr1	103250645	103250704	-
miRNA	cfa-novelmiR-3-3p	chr1	103250645	103250666	-
miRNA	cfa-novelmiR-3-5p	chr1	103250683	103250704	-
premiRNA	cfa-novelmir-4	chr10	282143	282202	+
miRNA	cfa-novelmiR-4-3p	chr10	282180	282202	+
miRNA	cfa-novelmiR-4-5p	chr10	282143	282164	+
premiRNA	cfa-novelmir-5	chr10	13303676	13303731	+
miRNA	cfa-novelmiR-5-5p	chr10	13303676	13303698	+
miRNA	cfa-novelmiR-5-3p	chr10	13303711	13303731	+
premiRNA	cfa-novelmir-6	chr10	16859593	16859654	-
miRNA	cfa-novelmiR-6-5p	chr10	16859633	16859654	-
miRNA	cfa-novelmiR-6-3p	chr10	16859593	16859613	-
premiRNA	cfa-novelmir-7	chr10	17382427	17382486	+
miRNA	cfa-novelmiR-7-5p	chr10	17382427	17382450	+
miRNA	cfa-novelmiR-7-3p	chr10	17382465	17382486	+
premiRNA	cfa-novelmir-8	chr10	23455716	23455774	-
miRNA	cfa-novelmiR-8-5p	chr10	23455752	23455774	-
miRNA	cfa-novelmiR-8-3p	chr10	23455716	23455737	-
premiRNA	cfa-novelmir-9	chr11	26741536	26741600	+
miRNA	cfa-novelmiR-9-5p	chr11	26741536	26741560	+
miRNA	cfa-novelmiR-9-3p	chr11	26741581	26741600	+
premiRNA	cfa-novelmir-10	chr11	44889971	44890038	-
miRNA	cfa-novelmiR-10-5p	chr11	44890015	44890038	-
miRNA	cfa-novelmiR-10-3p	chr11	44889971	44889995	-
premiRNA	cfa-novelmir-11	chr11	46838188	46838244	-
miRNA	cfa-novelmiR-11-5p	chr11	46838224	46838244	-
miRNA	cfa-novelmiR-11-3p	chr11	46838188	46838209	-
premiRNA	cfa-novelmir-12	chr11	65177591	65177655	+
miRNA	cfa-novelmiR-12-5p	chr11	65177591	65177613	+
miRNA	cfa-novelmiR-12-3p	chr11	65177633	65177655	+
premiRNA	cfa-novelmir-13	chr11	74256390	74256443	+
miRNA	cfa-novelmiR-13-5p	chr11	74256390	74256411	+
miRNA	cfa-novelmiR-13-3p	chr11	74256423	74256443	+
premiRNA	cfa-novelmir-14	chr12	37307857	37307916	+
miRNA	cfa-novelmiR-14-5p	chr12	37307857	37307876	+
miRNA	cfa-novelmiR-14-3p	chr12	37307895	37307916	+
premiRNA	cfa-novelmir-15	chr13	37603000	37603062	+
miRNA	cfa-novelmiR-15-5p	chr13	37603000	37603021	+
miRNA	cfa-novelmiR-15-3p	chr13	37603041	37603062	+
premiRNA	cfa-novelmir-16	chr14	3837163	3837224	-
miRNA	cfa-novelmiR-16-3p	chr14	3837163	3837183	-
miRNA	cfa-novelmiR-16-5p	chr14	3837202	3837224	-
premiRNA	cfa-novelmir-17	chr15	6058622	6058680	-
miRNA	cfa-novelmiR-17-5p	chr15	6058660	6058680	-
miRNA	cfa-novelmiR-17-3p	chr15	6058622	6058643	-
premiRNA	cfa-novelmir-18	chr15	28107143	28107201	-
miRNA	cfa-novelmiR-18-5p	chr15	28107179	28107201	-
miRNA	cfa-novelmiR-18-3p	chr15	28107143	28107164	-
premiRNA	cfa-novelmir-19	chr15	37111042	37111100	+
miRNA	cfa-novelmiR-19-5p	chr15	37111042	37111062	+
miRNA	cfa-novelmiR-19-3p	chr15	37111080	37111100	+
premiRNA	cfa-novelmir-20	chr18	38659448	38659512	+
miRNA	cfa-novelmiR-20-5p	chr18	38659448	38659469	+
miRNA	cfa-novelmiR-20-3p	chr18	38659491	38659512	+
premiRNA	cfa-novelmir-21	chr18	43679908	43679984	-
miRNA	cfa-novelmiR-21-5p	chr18	43679966	43679984	-
miRNA	cfa-novelmiR-21-3p	chr18	43679908	43679924	-
premiRNA	cfa-novelmir-22	chr19	45798730	45798787	+
miRNA	cfa-novelmiR-22-5p	chr19	45798730	45798751	+
miRNA	cfa-novelmiR-22-3p	chr19	45798766	45798787	+
premiRNA	cfa-novelmir-23	chr19	53244981	53245032	-
miRNA	cfa-novelmiR-23-3p	chr19	53244981	53245000	-
miRNA	cfa-novelmiR-23-5p	chr19	53245012	53245032	-
premiRNA	cfa-novelmir-24	chr20	40081102	40081156	+
miRNA	cfa-novelmiR-24-3p	chr20	40081135	40081156	+
miRNA	cfa-novelmiR-24-5p	chr20	40081102	40081120	+
premiRNA	cfa-novelmir-25	chr20	50760564	50760624	+
miRNA	cfa-novelmiR-25-3p	chr20	50760602	50760624	+
miRNA	cfa-novelmiR-25-5p	chr20	50760564	50760587	+
premiRNA	cfa-novelmir-26	chr21	32100955	32101018	+
miRNA	cfa-novelmiR-26-5p	chr21	32100955	32100977	+
miRNA	cfa-novelmiR-26-3p	chr21	32100994	32101018	+
premiRNA	cfa-novelmir-27	chr23	49206897	49206956	-
miRNA	cfa-novelmiR-27-3p	chr23	49206897	49206917	-
miRNA	cfa-novelmiR-27-5p	chr23	49206934	49206956	-
premiRNA	cfa-novelmir-28	chr24	5063148	5063211	+
miRNA	cfa-novelmiR-28-5p	chr24	5063148	5063167	+
miRNA	cfa-novelmiR-28-3p	chr24	5063191	5063211	+
premiRNA	cfa-novelmir-29	chr24	22892649	22892709	-
miRNA	cfa-novelmiR-29-3p	chr24	22892649	22892671	-
miRNA	cfa-novelmiR-29-5p	chr24	22892689	22892709	-
premiRNA	cfa-novelmir-30	chr24	47411217	47411275	-
miRNA	cfa-novelmiR-30-5p	chr24	47411254	47411275	-
miRNA	cfa-novelmiR-30-3p	chr24	47411217	47411239	-
premiRNA	cfa-novelmir-31	chr24	47411220	47411278	+
miRNA	cfa-novelmiR-31-3p	chr24	47411256	47411278	+
miRNA	cfa-novelmiR-31-5p	chr24	47411220	47411240	+
premiRNA	cfa-novelmir-32	chr25	43332307	43332384	-
miRNA	cfa-novelmiR-32-5p	chr25	43332360	43332384	-
miRNA	cfa-novelmiR-32-3p	chr25	43332307	43332325	-
premiRNA	cfa-novelmir-33	chr26	28565835	28565895	-
miRNA	cfa-novelmiR-33-5p	chr26	28565873	28565895	-
miRNA	cfa-novelmiR-33-3p	chr26	28565835	28565855	-
premiRNA	cfa-novelmir-34	chr26	29212372	29212431	-
miRNA	cfa-novelmiR-34-5p	chr26	29212409	29212431	-
miRNA	cfa-novelmiR-34-3p	chr26	29212372	29212394	-
premiRNA	cfa-novelmir-35	chr26	38700724	38700793	-
miRNA	cfa-novelmiR-35-3p	chr26	38700724	38700745	-
miRNA	cfa-novelmiR-35-5p	chr26	38700772	38700793	-
premiRNA	cfa-novelmir-36	chr27	34484955	34485016	-
miRNA	cfa-novelmiR-36-3p	chr27	34484955	34484976	-
miRNA	cfa-novelmiR-36-5p	chr27	34484995	34485016	-
premiRNA	cfa-novelmir-37	chr28	23373855	23373911	+
miRNA	cfa-novelmiR-37-5p	chr28	23373855	23373876	+
miRNA	cfa-novelmiR-37-3p	chr28	23373891	23373911	+
premiRNA	cfa-novelmir-38	chr28	23380539	23380604	-
miRNA	cfa-novelmiR-38-5p	chr28	23380582	23380604	-
miRNA	cfa-novelmiR-38-3p	chr28	23380539	23380562	-
premiRNA	cfa-novelmir-39	chr28	36030430	36030487	+
miRNA	cfa-novelmiR-39-5p	chr28	36030430	36030451	+
miRNA	cfa-novelmiR-39-3p	chr28	36030465	36030487	+
premiRNA	cfa-novelmir-40	chr29	14264386	14264444	-
miRNA	cfa-novelmiR-40-3p	chr29	14264386	14264407	-
miRNA	cfa-novelmiR-40-5p	chr29	14264423	14264444	-
premiRNA	cfa-novelmir-41	chr30	15365735	15365793	+
miRNA	cfa-novelmiR-41-3p	chr30	15365772	15365793	+
miRNA	cfa-novelmiR-41-5p	chr30	15365735	15365756	+
premiRNA	cfa-novelmir-42	chr30	27388078	27388136	+
miRNA	cfa-novelmiR-42-3p	chr30	27388115	27388136	+
miRNA	cfa-novelmiR-42-5p	chr30	27388078	27388099	+
premiRNA	cfa-novelmir-43	chr30	30768164	30768225	-
miRNA	cfa-novelmiR-43-3p	chr30	30768164	30768185	-
miRNA	cfa-novelmiR-43-5p	chr30	30768200	30768225	-
premiRNA	cfa-novelmir-44	chr31	28438574	28438639	-
miRNA	cfa-novelmiR-44-5p	chr31	28438622	28438639	-
miRNA	cfa-novelmiR-44-3p	chr31	28438574	28438588	-
premiRNA	cfa-novelmir-45	chr31	32635980	32636041	+
miRNA	cfa-novelmiR-45-5p	chr31	32635980	32636001	+
miRNA	cfa-novelmiR-45-3p	chr31	32636020	32636041	+
premiRNA	cfa-novelmir-46	chr31	33861207	33861265	+
miRNA	cfa-novelmiR-46-3p	chr31	33861244	33861265	+
miRNA	cfa-novelmiR-46-5p	chr31	33861207	33861229	+
premiRNA	cfa-novelmir-47	chr32	1614020	1614083	-
miRNA	cfa-novelmiR-47-5p	chr32	1614063	1614083	-
miRNA	cfa-novelmiR-47-3p	chr32	1614020	1614039	-
premiRNA	cfa-novelmir-48	chr33	635646	635727	+
miRNA	cfa-novelmiR-48-3p	chr33	635710	635727	+
miRNA	cfa-novelmiR-48-5p	chr33	635646	635663	+
premiRNA	cfa-novelmir-49	chr33	28347612	28347671	-
miRNA	cfa-novelmiR-49-3p	chr33	28347612	28347633	-
miRNA	cfa-novelmiR-49-5p	chr33	28347648	28347671	-
premiRNA	cfa-novelmir-50	chr33	29705323	29705391	-
miRNA	cfa-novelmiR-50-5p	chr33	29705370	29705391	-
miRNA	cfa-novelmiR-50-3p	chr33	29705323	29705344	-
premiRNA	cfa-novelmir-51	chr34	32819969	32820027	-
miRNA	cfa-novelmiR-51-3p	chr34	32819969	32819990	-
miRNA	cfa-novelmiR-51-5p	chr34	32820006	32820027	-
premiRNA	cfa-novelmir-52	chr35	83029	83089	-
miRNA	cfa-novelmiR-52-3p	chr35	83029	83051	-
miRNA	cfa-novelmiR-52-5p	chr35	83067	83089	-
premiRNA	cfa-novelmir-53	chr37	15549134	15549198	-
miRNA	cfa-novelmiR-53-5p	chr37	15549178	15549198	-
miRNA	cfa-novelmiR-53-3p	chr37	15549134	15549154	-
premiRNA	cfa-novelmir-54	chrX	32945420	32945483	-
miRNA	cfa-novelmiR-54-3p	chrX	32945420	32945441	-
miRNA	cfa-novelmiR-54-5p	chrX	32945461	32945483	-
premiRNA	cfa-novelmir-55	chrX	33472826	33472884	+
miRNA	cfa-novelmiR-55-3p	chrX	33472863	33472884	+
miRNA	cfa-novelmiR-55-5p	chrX	33472826	33472847	+
premiRNA	cfa-novelmir-56	chrX	42781868	42781930	+
miRNA	cfa-novelmiR-56-3p	chrX	42781908	42781930	+
miRNA	cfa-novelmiR-56-5p	chrX	42781868	42781893	+
premiRNA	cfa-novelmir-57	chrX	87468912	87468985	+
miRNA	cfa-novelmiR-57-5p	chrX	87468912	87468933	+
miRNA	cfa-novelmiR-57-3p	chrX	87468964	87468985	+
premiRNA	cfa-novelmir-58	chrX	90605742	90605799	+
miRNA	cfa-novelmiR-58-5p	chrX	90605742	90605762	+
miRNA	cfa-novelmiR-58-3p	chrX	90605778	90605799	+
premiRNA	cfa-novelmir-59	chrX	91812853	91812920	-
miRNA	cfa-novelmiR-59-3p	chrX	91812853	91812872	-
miRNA	cfa-novelmiR-59-5p	chrX	91812903	91812920	-
premiRNA	cfa-novelmir-60	chrX	114677360	114677415	-
miRNA	cfa-novelmiR-60-3p	chrX	114677360	114677380	-
miRNA	cfa-novelmiR-60-5p	chrX	114677395	114677415	-
premiRNA	cfa-novelmir-61	chrX	119928560	119928619	-
miRNA	cfa-novelmiR-61-3p	chrX	119928560	119928580	-
miRNA	cfa-novelmiR-61-5p	chrX	119928598	119928619	-

## Sheet: TableS10e
Candidate novel miRNAs in chicken
Type	Name	Chromosome (galGal5)	Start (galGal5)	End (galGal5)	Strand (galGal5)	Chromosome (galGal6)	Start (galGal6)	End (galGal6)	Strand (galGal6)
premiRNA	gga-novelmir-1	chr1	66061720	66061780	+	chr1	+	66008308	66008368
miRNA	gga-novelmiR-1-3p	chr1	66061759	66061780	+	chr1	+	66008347	66008368
miRNA	gga-novelmiR-1-5p	chr1	66061720	66061741	+	chr1	+	66008308	66008329
premiRNA	gga-novelmir-2	chr1	66070801	66070867	+	chr1	+	66017389	66017455
miRNA	gga-novelmiR-2-3p	chr1	66070844	66070867	+	chr1	+	66017432	66017455
miRNA	gga-novelmiR-2-5p	chr1	66070801	66070822	+	chr1	+	66017389	66017410
premiRNA	gga-novelmir-3	chr1	72122792	72122846	+	chr1	+	72032717	72032771
miRNA	gga-novelmiR-3-3p	chr1	72122826	72122846	+	chr1	+	72032751	72032771
miRNA	gga-novelmiR-3-5p	chr1	72122792	72122813	+	chr1	+	72032717	72032738
premiRNA	gga-novelmir-4	chr1	80309896	80309955	+	chr1	+	81096439	81096498
miRNA	gga-novelmiR-4-5p	chr1	80309896	80309919	+	chr1	+	81096439	81096462
miRNA	gga-novelmiR-4-3p	chr1	80309934	80309955	+	chr1	+	81096477	81096498
premiRNA	gga-novelmir-5	chr1	101037302	101037347	-	chr16	+	1804306	1804351
miRNA	gga-novelmiR-5-3p	chr1	101037302	101037323	-	chr16	+	1804330	1804351
miRNA	gga-novelmiR-5-5p	chr1	101037327	101037347	-	chr16	+	1804306	1804326
premiRNA	gga-novelmir-6	chr1	112075100	112075172	-	chr1	-	113380613	113380685
miRNA	gga-novelmiR-6-3p	chr1	112075100	112075123	-	chr1	-	113380613	113380636
miRNA	gga-novelmiR-6-5p	chr1	112075148	112075172	-	chr1	-	113380661	113380685
premiRNA	gga-novelmir-7	chr1	133682290	133682347	+	chr1	+	134912431	134912488
miRNA	gga-novelmiR-7-3p	chr1	133682326	133682347	+	chr1	+	134912467	134912488
miRNA	gga-novelmiR-7-5p	chr1	133682290	133682312	+	chr1	+	134912431	134912453
premiRNA	gga-novelmir-8	chr1	185892271	185892347	-	chr1	-	187136123	187136199
miRNA	gga-novelmiR-8-3p	chr1	185892271	185892293	-	chr1	-	187136123	187136145
miRNA	gga-novelmiR-8-5p	chr1	185892325	185892347	-	chr1	-	187136177	187136199
premiRNA	gga-novelmir-9	chr11	16507661	16507714	+	chr11	+	16276111	16276164
miRNA	gga-novelmiR-9-3p	chr11	16507695	16507714	+	chr11	+	16276145	16276164
miRNA	gga-novelmiR-9-5p	chr11	16507661	16507680	+	chr11	+	16276111	16276130
premiRNA	gga-novelmir-10	chr11	18690371	18690430	-	chr11	-	18446412	18446471
miRNA	gga-novelmiR-10-5p	chr11	18690408	18690430	-	chr11	-	18446449	18446471
miRNA	gga-novelmiR-10-3p	chr11	18690371	18690393	-	chr11	-	18446412	18446434
premiRNA	gga-novelmir-11	chr12	3154779	3154841	+	chr12	+	3567435	3567497
miRNA	gga-novelmiR-11-5p	chr12	3154779	3154799	+	chr12	+	3567435	3567455
miRNA	gga-novelmiR-11-3p	chr12	3154821	3154841	+	chr12	+	3567477	3567497
premiRNA	gga-novelmir-12	chr12	11670979	11671038	+	chr12	+	12045267	12045326
miRNA	gga-novelmiR-12-5p	chr12	11670979	11671001	+	chr12	+	12045267	12045289
miRNA	gga-novelmiR-12-3p	chr12	11671018	11671038	+	chr12	+	12045306	12045326
premiRNA	gga-novelmir-13	chr12	11671363	11671424	+	chr12	+	12045651	12045712
miRNA	gga-novelmiR-13-5p	chr12	11671363	11671387	+	chr12	+	12045651	12045675
miRNA	gga-novelmiR-13-3p	chr12	11671403	11671424	+	chr12	+	12045691	12045712
premiRNA	gga-novelmir-14	chr12	11671628	11671685	+	chr12	+	12045916	12045973
miRNA	gga-novelmiR-14-5p	chr12	11671628	11671648	+	chr12	+	12045916	12045936
miRNA	gga-novelmiR-14-3p	chr12	11671664	11671685	+	chr12	+	12045952	12045973
premiRNA	gga-novelmir-15	chr13	8492497	8492557	-	chr13	-	9212132	9212192
miRNA	gga-novelmiR-15-5p	chr13	8492535	8492557	-	chr13	-	9212170	9212192
miRNA	gga-novelmiR-15-3p	chr13	8492497	8492517	-	chr13	-	9212132	9212152
premiRNA	gga-novelmir-16	chr13	8493110	8493164	-	chr13	-	9212740	9212794
miRNA	gga-novelmiR-16-3p	chr13	8493110	8493130	-	chr13	-	9212740	9212760
miRNA	gga-novelmiR-16-5p	chr13	8493142	8493164	-	chr13	-	9212772	9212794
premiRNA	gga-novelmir-17	chr13	17162741	17162796	-	chr13	-	17776576	17776631
miRNA	gga-novelmiR-17-5p	chr13	17162773	17162796	-	chr13	-	17776608	17776631
miRNA	gga-novelmiR-17-3p	chr13	17162741	17162763	-	chr13	-	17776576	17776598
premiRNA	gga-novelmir-18	chr14	6179803	6179864	-	chr14	-	6539907	6539968
miRNA	gga-novelmiR-18-3p	chr14	6179803	6179825	-	chr14	-	6539907	6539929
miRNA	gga-novelmiR-18-5p	chr14	6179843	6179864	-	chr14	-	6539947	6539968
premiRNA	gga-novelmir-19	chr14	11856461	11856532	-	chr14	-	12203394	12203465
miRNA	gga-novelmiR-19-5p	chr14	11856515	11856532	-	chr14	-	12203448	12203465
miRNA	gga-novelmiR-19-3p	chr14	11856461	11856476	-	chr14	-	12203394	12203409
premiRNA	gga-novelmir-20	chr15	472004	472081	-	chr15	-	767600	767677
miRNA	gga-novelmiR-20-5p	chr15	472062	472081	-	chr15	-	767658	767677
miRNA	gga-novelmiR-20-3p	chr15	472004	472024	-	chr15	-	767600	767620
premiRNA	gga-novelmir-21	chr15	743032	743093	+	chr15	+	1038617	1038678
miRNA	gga-novelmiR-21-5p	chr15	743032	743053	+	chr15	+	1038617	1038638
miRNA	gga-novelmiR-21-3p	chr15	743070	743093	+	chr15	+	1038655	1038678
premiRNA	gga-novelmir-22	chr15	9319320	9319387	-	chr15	-	9559721	9559788
miRNA	gga-novelmiR-22-3p	chr15	9319320	9319340	-	chr15	-	9559721	9559741
miRNA	gga-novelmiR-22-5p	chr15	9319366	9319387	-	chr15	-	9559767	9559788
premiRNA	gga-novelmir-23	chr15	10903030	10903074	+	chr15	+	11129366	11129410
miRNA	gga-novelmiR-23-3p	chr15	10903053	10903074	+	chr15	+	11129389	11129410
miRNA	gga-novelmiR-23-5p	chr15	10903030	10903051	+	chr15	+	11129366	11129387
premiRNA	gga-novelmir-24	chr16	155560	155639	+	chr16	-	2527907	2527986
miRNA	gga-novelmiR-24-3p	chr16	155616	155639	+	chr16	-	2527907	2527930
miRNA	gga-novelmiR-24-5p	chr16	155560	155582	+	chr16	-	2527964	2527986
premiRNA	gga-novelmir-25	chr18	6449723	6449783	+	chr18	+	6375504	6375564
miRNA	gga-novelmiR-25-5p	chr18	6449723	6449744	+	chr18	+	6375504	6375525
miRNA	gga-novelmiR-25-3p	chr18	6449759	6449783	+	chr18	+	6375540	6375564
premiRNA	gga-novelmir-26	chr18	6491337	6491395	+	chr18	+	6417119	6417177
miRNA	gga-novelmiR-26-3p	chr18	6491374	6491395	+	chr18	+	6417156	6417177
miRNA	gga-novelmiR-26-5p	chr18	6491337	6491358	+	chr18	+	6417119	6417140
premiRNA	gga-novelmir-27	chr18	9383535	9383593	+	chr18	+	9290670	9290728
miRNA	gga-novelmiR-27-3p	chr18	9383573	9383593	+	chr18	+	9290708	9290728
miRNA	gga-novelmiR-27-5p	chr18	9383535	9383555	+	chr18	+	9290670	9290690
premiRNA	gga-novelmir-28	chr19	58572	58635	+	chr19	+	254403	254466
miRNA	gga-novelmiR-28-5p	chr19	58572	58594	+	chr19	+	254403	254425
miRNA	gga-novelmiR-28-3p	chr19	58614	58635	+	chr19	+	254445	254466
premiRNA	gga-novelmir-29	chr19	4883279	4883333	+	chr19	+	5046639	5046693
miRNA	gga-novelmiR-29-3p	chr19	4883313	4883333	+	chr19	+	5046673	5046693
miRNA	gga-novelmiR-29-5p	chr19	4883279	4883299	+	chr19	+	5046639	5046659
premiRNA	gga-novelmir-30	chr19	5515026	5515081	+	chr19	+	5662689	5662744
miRNA	gga-novelmiR-30-5p	chr19	5515026	5515047	+	chr19	+	5662689	5662710
miRNA	gga-novelmiR-30-3p	chr19	5515061	5515081	+	chr19	+	5662724	5662744
premiRNA	gga-novelmir-31	chr19	5515771	5515834	-	chr19	-	5663433	5663496
miRNA	gga-novelmiR-31-5p	chr19	5515812	5515834	-	chr19	-	5663474	5663496
miRNA	gga-novelmiR-31-3p	chr19	5515771	5515791	-	chr19	-	5663433	5663453
premiRNA	gga-novelmir-32	chr19	7378734	7378797	+	chr19	+	7515898	7515961
miRNA	gga-novelmiR-32-3p	chr19	7378776	7378797	+	chr19	+	7515940	7515961
miRNA	gga-novelmiR-32-5p	chr19	7378734	7378760	+	chr19	+	7515898	7515924
premiRNA	gga-novelmir-33	chr20	9710469	9710529	+	chr20	+	9510195	9510255
miRNA	gga-novelmiR-33-5p	chr20	9710469	9710490	+	chr20	+	9510195	9510216
miRNA	gga-novelmiR-33-3p	chr20	9710508	9710529	+	chr20	+	9510234	9510255
premiRNA	gga-novelmir-34	chr20	10004107	10004168	-	chr20	-	9803019	9803080
miRNA	gga-novelmiR-34-5p	chr20	10004144	10004168	-	chr20	-	9803056	9803080
miRNA	gga-novelmiR-34-3p	chr20	10004107	10004128	-	chr20	-	9803019	9803040
premiRNA	gga-novelmir-35	chr22	458530	458587	-	chr22	-	595906	595963
miRNA	gga-novelmiR-35-3p	chr22	458530	458551	-	chr22	-	595906	595927
miRNA	gga-novelmiR-35-5p	chr22	458570	458587	-	chr22	-	595946	595963
premiRNA	gga-novelmir-36	chr22	854560	854617	-	chr22	-	991934	991991
miRNA	gga-novelmiR-36-5p	chr22	854597	854617	-	chr22	-	991971	991991
miRNA	gga-novelmiR-36-3p	chr22	854560	854580	-	chr22	-	991934	991954
premiRNA	gga-novelmir-37	chr22	4649592	4649650	+	chr22	+	5203946	5204005
miRNA	gga-novelmiR-37-3p	chr22	4649629	4649650	+	chr22	+	5203983	5204005
miRNA	gga-novelmiR-37-5p	chr22	4649592	4649612	+	chr22	+	5203946	5203966
premiRNA	gga-novelmir-38	chr24	3360829	3360891	+	chr24	+	3390290	3390352
miRNA	gga-novelmiR-38-3p	chr24	3360870	3360891	+	chr24	+	3390331	3390352
miRNA	gga-novelmiR-38-5p	chr24	3360829	3360851	+	chr24	+	3390290	3390312
premiRNA	gga-novelmir-39	chr25	2120334	2120393	-	chr25	-	2882988	2883047
miRNA	gga-novelmiR-39-5p	chr25	2120372	2120393	-	chr25	-	2883026	2883047
miRNA	gga-novelmiR-39-3p	chr25	2120334	2120356	-	chr25	-	2882988	2883010
premiRNA	gga-novelmir-40	chr27	5090907	5090964	-	chr27	-	7487464	7487521
miRNA	gga-novelmiR-40-5p	chr27	5090941	5090964	-	chr27	-	7487498	7487521
miRNA	gga-novelmiR-40-3p	chr27	5090907	5090927	-	chr27	-	7487464	7487484
premiRNA	gga-novelmir-41	chr33	217287	217343	-	chr33	-	5702513	5702569
miRNA	gga-novelmiR-41-3p	chr33	217287	217306	-	chr33	-	5702513	5702532
miRNA	gga-novelmiR-41-5p	chr33	217322	217343	-	chr33	-	5702548	5702569
premiRNA	gga-novelmir-42	chr33	1093263	1093323	+	chr33	+	7660063	7660122
miRNA	gga-novelmiR-42-5p	chr33	1093263	1093284	+	chr33	+	7660063	7660084
miRNA	gga-novelmiR-42-3p	chr33	1093302	1093323	+	chr33	+	7660102	7660122
premiRNA	gga-novelmir-43	chr33	1171914	1171973	+	chr33	+	7737151	7737210
miRNA	gga-novelmiR-43-3p	chr33	1171952	1171973	+	chr33	+	7737189	7737210
miRNA	gga-novelmiR-43-5p	chr33	1171914	1171937	+	chr33	+	7737151	7737174
premiRNA	gga-novelmir-44	chr33	1576507	1576567	-	chr33	-	6840629	6840689
miRNA	gga-novelmiR-44-3p	chr33	1576507	1576529	-	chr33	-	6840629	6840651
miRNA	gga-novelmiR-44-5p	chr33	1576544	1576567	-	chr33	-	6840666	6840689
premiRNA	gga-novelmir-45	chrW	3067249	3067313	-	chrW	-	4705187	4705251
miRNA	gga-novelmiR-45-5p	chrW	3067289	3067313	-	chrW	-	4705227	4705251
miRNA	gga-novelmiR-45-3p	chrW	3067249	3067270	-	chrW	-	4705187	4705208
premiRNA	gga-novelmir-46	chrZ	16702091	16702149	-	chrZ	-	16702024	16702082
miRNA	gga-novelmiR-46-5p	chrZ	16702126	16702149	-	chrZ	-	16702059	16702082
miRNA	gga-novelmiR-46-3p	chrZ	16702091	16702111	-	chrZ	-	16702024	16702044
premiRNA	gga-novelmir-47	chrZ	78517884	78517952	-	chrZ	-	78737639	78737707
miRNA	gga-novelmiR-47-3p	chrZ	78517884	78517905	-	chrZ	-	78737639	78737660
miRNA	gga-novelmiR-47-5p	chrZ	78517929	78517952	-	chrZ	-	78737684	78737707
