# Supplementary material for: Comparative transcriptomics of primary cells in vertebrates
Source: Genome Res. 2020 Jul;30(7):951–61. doi: 10.1101/gr.255679.119 (PMC7397866; doi:10.1101/gr.255679.119)
Supplement: Supplemental Material [file supp_gr.255679.119_Supplemental_Table_S11.xlsx]

## Sheet: README
Sheets TableS11a-TableS11d contain the differential expression analysis results of mature miRNAs between human and mouse, rat, dog, or chicken in each primary cell type in FANTOM5, with the miRNA expression level as measured by sRNA sequencing shown in counts-per-million, the log2 fold-change, and the −log10 Benjamini-Hochberg corrected p-value, multiplied by the sign of the log2 fold-change.

## Sheet: TableS11a
Differential miRNA expression analysis, sRNA sequencing data, mouse vs human, Aortic Smooth Muscle Cells
miRNA, human	miRNA, mouse	cpm, human, Aortic Smooth Muscle Cells	cpm, mouse, Aortic Smooth Muscle Cells	log2(foldchange)	-log10(pvalue)*sign
hsa-let-7a-5p	mmu-let-7a-5p	38094.9	7964.89	1.79438	6.51906
hsa-let-7b-5p	mmu-let-7b-5p	4562.99	3763.12	-0.187752	-0.159251
hsa-let-7c-5p	mmu-let-7c-5p	854.626	13251.5	-4.48456	-3.55141
hsa-let-7d-5p	mmu-let-7d-5p	977.845	1940.27	-1.4857	-1.80304
hsa-let-7e-5p	mmu-let-7e-5p	2996.98	2278.9	-0.081969	-0.0453565
hsa-let-7f-5p	mmu-let-7f-5p	27266.3	20379.4	-0.0447258	-0.0285568
hsa-let-7g-5p	mmu-let-7g-5p	3216.47	2392.04	-0.0548577	-0.0285568
hsa-let-7i-5p	mmu-let-7i-5p	20709.4	43338.4	-1.52112	-2.88602
hsa-miR-100-5p	mmu-miR-100-5p	226153	1569.62	6.77587	15.6581
hsa-miR-101-3p	mmu-miR-101a-3p	1064.42	1057.49	-0.489415	-0.274593
hsa-miR-103a-3p	mmu-miR-103-3p	3453.61	3590.52	-0.516018	-0.631045
hsa-miR-10a-5p	mmu-miR-10a-5p	14143.3	115353	-3.53142	-8.082
hsa-miR-10b-5p	mmu-miR-10b-5p	3556.18	17208.6	-2.81287	-0.464043
hsa-miR-125a-5p	mmu-miR-125a-5p	8554	7255.69	-0.245189	-0.117704
hsa-miR-125b-5p	mmu-miR-125b-5p	19750.7	7950.68	0.86646	0.564646
hsa-miR-126-5p	mmu-miR-126a-5p	364.047	25.9611	3.2829	2.16538
hsa-miR-127-3p	mmu-miR-127-3p	17744.1	2.97914	12.1639	27.4717
hsa-miR-128-3p	mmu-miR-128-3p	835.971	91.9277	2.77466	2.90739
hsa-miR-129-5p	mmu-miR-129-5p	4.24737	1223.57	-8.56747	-7.66512
hsa-miR-130a-3p	mmu-miR-130a-3p	1476.71	3597.46	-1.75683	-5.012
hsa-miR-130b-3p	mmu-miR-130b-3p	488.951	83.4754	2.07245	2.11101
hsa-miR-132-3p	mmu-miR-132-3p	103.115	221.307	-1.56621	-1.06723
hsa-miR-134-5p	mmu-miR-134-5p	161.232	0.425591	8.1603	4.62629
hsa-miR-136-3p	mmu-miR-136-3p	1053.89	0	13.3566	6.99979
hsa-miR-138-5p	mmu-miR-138-5p	2026.4	30.2167	5.53695	2.55582
hsa-miR-140-3p	mmu-miR-140-3p	819.659	6883.51	-3.50587	-6.13616
hsa-miR-141-3p	mmu-miR-141-3p	804.159	3.40393	7.3178	1.02036
hsa-miR-143-3p	mmu-miR-143-3p	11103.8	88902.1	-3.33798	-2.07284
hsa-miR-145-5p	mmu-miR-145a-5p	249.464	1721.94	-3.12823	-1.68734
hsa-miR-146a-5p	mmu-miR-146a-5p	933.56	184.675	2.01303	0.721344
hsa-miR-146b-5p	mmu-miR-146b-5p	73.4513	18251.1	-8.47498	-15.6015
hsa-miR-148a-3p	mmu-miR-148a-3p	3840.14	7578.24	-1.52591	-0.478305
hsa-miR-148b-3p	mmu-miR-148b-3p	1261.45	1575.6	-0.755093	-0.564646
hsa-miR-149-5p	mmu-miR-149-5p	863.494	108.526	2.48232	2.84052
hsa-miR-151a-5p	mmu-miR-151-5p	9516.44	2259.33	1.61765	1.96477
hsa-miR-152-3p	mmu-miR-152-3p	366.288	282.648	-0.0473939	-0.0128334
hsa-miR-155-5p	mmu-miR-155-5p	2172.57	131.508	3.53223	3.02461
hsa-miR-15a-5p	mmu-miR-15a-5p	423.347	403.886	-0.449153	-0.126555
hsa-miR-15b-5p	mmu-miR-15b-5p	228.774	269.399	-0.729621	-0.394867
hsa-miR-16-5p	mmu-miR-16-5p	3685.44	6163.41	-1.22804	-2.02093
hsa-miR-17-5p	mmu-miR-17-5p	383.097	224.283	0.259806	0.0677228
hsa-miR-181a-5p	mmu-miR-181a-5p	12974.7	7914.29	0.273129	0.126555
hsa-miR-181b-5p	mmu-miR-181b-5p	2894.6	1655.77	0.380522	0.182556
hsa-miR-181c-5p	mmu-miR-181c-5p	220.796	1933.89	-3.62667	-6.13616
hsa-miR-181d-5p	mmu-miR-181d-5p	42.2699	776.057	-4.63915	-7.69213
hsa-miR-182-5p	mmu-miR-182-5p	1844.87	5164.12	-2.04853	-0.249822
hsa-miR-183-5p	mmu-miR-183-5p	558.248	581.357	-0.623242	-0.0351039
hsa-miR-184	mmu-miR-184-3p	74.8852	6.80946	2.85626	0.162628
hsa-miR-186-5p	mmu-miR-186-5p	6429.71	2176.9	1.07589	0.66207
hsa-miR-18a-5p	mmu-miR-18a-5p	102.803	82.9898	-0.222792	-0.0285568
hsa-miR-191-5p	mmu-miR-191-5p	9405.69	8951.46	-0.354624	-0.137473
hsa-miR-192-5p	mmu-miR-192-5p	506.788	576.25	-0.692014	-0.375651
hsa-miR-193a-3p	mmu-miR-193a-3p	756.642	822.352	-0.517396	-0.117704
hsa-miR-193b-3p	mmu-miR-193b-3p	422.329	139.056	1.12796	0.668441
hsa-miR-195-5p	mmu-miR-195a-5p	46.2386	183.009	-2.50468	-1.2411
hsa-miR-196b-5p	mmu-miR-196b-5p	46.7157	1.67808	4.17312	0.26341
hsa-miR-199a-3p	mmu-miR-199a-3p	6731.36	9614.23	-0.952662	-1.01691
hsa-miR-199b-5p	mmu-miR-199b-5p	1684.12	93.101	3.65133	1.2594
hsa-miR-19a-3p	mmu-miR-19a-3p	207.364	91.5267	0.662185	0.137473
hsa-miR-19b-3p	mmu-miR-19b-3p	463.824	597.93	-0.875667	-0.327572
hsa-miR-200a-3p	mmu-miR-200a-3p	88.0238	0.426387	7.12823	0.890707
hsa-miR-200b-3p	mmu-miR-200b-3p	1124.67	0.851182	9.80146	1.58162
hsa-miR-200c-3p	mmu-miR-200c-3p	484.158	0.425591	9.58648	1.54364
hsa-miR-203a-3p	mmu-miR-203-3p	76.3904	0.851182	5.92283	0.486199
hsa-miR-204-5p	mmu-miR-204-5p	1044.68	0.000125943	13.1628	4.62934
hsa-miR-205-5p	mmu-miR-205-5p	11600.5	7.23505	10.0804	1.01691
hsa-miR-20a-5p	mmu-miR-20a-5p	395.458	156.192	0.814043	0.179361
hsa-miR-21-5p	mmu-miR-21a-5p	112943	158131	-0.971141	-1.43456
hsa-miR-210-3p	mmu-miR-210-3p	463.348	214.923	0.615952	0.369208
hsa-miR-214-3p	mmu-miR-214-3p	143.239	903.53	-3.09448	-3.46341
hsa-miR-218-5p	mmu-miR-218-5p	185.244	455.382	-1.78803	-1.01691
hsa-miR-22-3p	mmu-miR-22-3p	126233	206028	-1.15074	-1.73437
hsa-miR-221-3p	mmu-miR-221-3p	9774.63	2713.57	1.37312	2.3564
hsa-miR-222-3p	mmu-miR-222-3p	16050.2	1381.47	3.08628	13.1586
hsa-miR-224-5p	mmu-miR-224-5p	1425.69	50.2197	4.4454	5.012
hsa-miR-23a-3p	mmu-miR-23a-3p	2574.69	829.366	1.1498	1.40063
hsa-miR-23b-3p	mmu-miR-23b-3p	1444.13	1017.7	0.0465598	0.0128334
hsa-miR-24-3p	mmu-miR-24-3p	599.104	1024.82	-1.26247	-1.26736
hsa-miR-25-3p	mmu-miR-25-3p	1433.99	3794.14	-1.91487	-2.00617
hsa-miR-26a-5p	mmu-miR-26a-5p	19443.4	50308.3	-1.83333	-6.03824
hsa-miR-26b-5p	mmu-miR-26b-5p	1920.52	2948.51	-1.08417	-1.79985
hsa-miR-27a-3p	mmu-miR-27a-3p	6770.01	1349.54	1.82381	1.85984
hsa-miR-27b-3p	mmu-miR-27b-3p	30785.9	21853.7	0.0269492	0.00892922
hsa-miR-28-3p	mmu-miR-28a-3p	3125.07	298.765	2.92118	8.01978
hsa-miR-299-3p	mmu-miR-299a-3p,mmu-miR-299b-3p	89.051	0.425591	7.26645	3.51725
hsa-miR-29a-3p	mmu-miR-29a-3p	11305.4	7399.5	0.162	0.10474
hsa-miR-29b-3p	mmu-miR-29b-3p	428.086	501.827	-0.694587	-0.182556
hsa-miR-29c-3p	mmu-miR-29c-3p	243.482	135.111	0.346729	0.117704
hsa-miR-301a-3p	mmu-miR-301a-3p	351.511	2221.69	-3.15954	-4.19653
hsa-miR-301b-3p	mmu-miR-301b-3p	79.8913	14.3657	1.9804	0.876457
hsa-miR-30a-5p	mmu-miR-30a-5p	10361.9	13830	-0.822516	-0.290341
hsa-miR-30b-5p	mmu-miR-30b-5p	605.983	1475.41	-1.79227	-1.77245
hsa-miR-30c-5p	mmu-miR-30c-5p	1881.08	2758.8	-1.02135	-1.43456
hsa-miR-30d-5p	mmu-miR-30d-5p	3587.97	8199.1	-1.6663	-4.26934
hsa-miR-30e-5p	mmu-miR-30e-5p	3328.26	4210.29	-0.798486	-0.464043
hsa-miR-31-5p	mmu-miR-31-5p	18867.1	1023.97	3.77082	4.59759
hsa-miR-320a	mmu-miR-320-3p	1668.13	640.089	0.909966	1.26891
hsa-miR-323a-3p	mmu-miR-323-3p	146.827	0	10.5052	4.09668
hsa-miR-328-3p	mmu-miR-328-3p	62.8286	180.876	-1.98919	-0.891275
hsa-miR-330-5p	mmu-miR-330-5p	106.685	8.51182	3.17943	2.55858
hsa-miR-331-3p	mmu-miR-331-3p	569.699	112.356	1.89194	2.88602
hsa-miR-335-3p	mmu-miR-335-3p	358.443	5.10709	5.83745	2.96497
hsa-miR-339-3p	mmu-miR-339-3p	148.566	56.178	0.939405	0.564646
hsa-miR-340-5p	mmu-miR-340-5p	283.874	1079.3	-2.4081	-3.42793
hsa-miR-342-3p	mmu-miR-342-3p	321.39	105.547	1.07596	0.375651
hsa-miR-34a-5p	mmu-miR-34a-5p	282.381	366.008	-0.848809	-0.709515
hsa-miR-34b-5p	mmu-miR-34b-5p	16.8443	613.03	-5.65854	-1.57221
hsa-miR-34c-5p	mmu-miR-34c-5p	220.664	16014.8	-6.68992	-5.83979
hsa-miR-361-5p	mmu-miR-361-5p	202.382	140.445	0.0778858	0.0264685
hsa-miR-365a-3p,hsa-miR-365b-3p	mmu-miR-365-3p	216.789	191.942	-0.255252	-0.0937873
hsa-miR-369-3p	mmu-miR-369-3p	209.294	0.425591	8.48698	4.61342
hsa-miR-370-3p	mmu-miR-370-3p	139.088	0	10.4183	4.09668
hsa-miR-375	mmu-miR-375-3p	59.2714	0.425591	6.56669	0.841177
hsa-miR-376a-5p	mmu-miR-376a-5p	147.222	0.425591	8.03535	4.15813
hsa-miR-376c-3p	mmu-miR-376c-3p	211.827	0	11.0331	4.61342
hsa-miR-377-5p	mmu-miR-377-5p	73.9588	0	9.51287	3.18785
hsa-miR-378a-3p	mmu-miR-378a-3p	1835.62	871.223	0.503055	0.094316
hsa-miR-379-3p	mmu-miR-379-3p	52.7616	0.000125943	9.06594	2.45003
hsa-miR-381-3p	mmu-miR-381-3p	1642.56	1.27677	9.99172	9.79048
hsa-miR-382-5p	mmu-miR-382-5p	94.4249	0	9.8306	3.81274
hsa-miR-409-3p	mmu-miR-409-3p	2761.19	1.27677	10.728	12.8942
hsa-miR-410-3p	mmu-miR-410-3p	984.566	0.851182	9.84541	7.25575
hsa-miR-411-5p	mmu-miR-411-5p	1958.4	2.97914	8.98998	13.3919
hsa-miR-421	mmu-miR-421-3p	195.346	278.337	-1.02075	-0.394867
hsa-miR-423-3p	mmu-miR-423-3p	4133.72	1205.7	1.32722	2.38083
hsa-miR-424-5p	mmu-miR-322-5p	234.038	776.278	-2.26973	-0.511573
hsa-miR-425-5p	mmu-miR-425-5p	243.037	263.015	-0.576161	-0.249822
hsa-miR-429	mmu-miR-429-3p	133.849	0	22.6282	4.71368
hsa-miR-431-5p	mmu-miR-431-5p	224.729	0	11.0841	4.62934
hsa-miR-432-5p	mmu-miR-432	142.899	0	10.4671	4.09668
hsa-miR-450a-5p	mmu-miR-450a-5p	100.084	57.0292	0.296707	0.0693779
hsa-miR-455-5p	mmu-miR-455-5p	126.784	12.7677	2.82554	1.58162
hsa-miR-485-3p	mmu-miR-485-3p	90.5241	0	9.78944	3.59862
hsa-miR-486-5p	mmu-miR-486a-5p,mmu-miR-486b-5p	94.4699	68.5201	0.0216283	0.0085142
hsa-miR-487b-3p	mmu-miR-487b-3p	395.857	0	11.9117	5.60023
hsa-miR-493-5p	mmu-miR-493-5p	122.291	0	10.1877	4.3242
hsa-miR-494-3p	mmu-miR-494-3p	164.594	0.425591	8.25179	3.8022
hsa-miR-495-3p	mmu-miR-495-3p	83.2612	0	9.6431	3.44056
hsa-miR-497-5p	mmu-miR-497a-5p	102.169	421.335	-2.56323	-1.37228
hsa-miR-501-3p	mmu-miR-501-3p	282.598	16.598	3.67015	3.92306
hsa-miR-505-3p	mmu-miR-505-3p	119.774	2.55355	5.09271	5.68098
hsa-miR-532-5p	mmu-miR-532-5p	556.803	377.074	0.129713	0.0285568
hsa-miR-543	mmu-miR-543-3p	79.7599	0	9.55983	3.2282
hsa-miR-615-3p	mmu-miR-615-3p	50.6615	1.27677	4.73615	1.02036
hsa-miR-652-3p	mmu-miR-652-3p	49.1865	114.91	-1.74609	-0.565526
hsa-miR-654-3p	mmu-miR-654-3p	2239.56	0.425591	12.0418	7.75036
hsa-miR-671-3p	mmu-miR-671-3p	128.506	71.4993	0.414784	0.132793
hsa-miR-708-5p	mmu-miR-708-5p	111.642	0	10.0115	3.57336
hsa-miR-744-5p	mmu-miR-744-5p	236.884	641.791	-1.84391	-0.841177
hsa-miR-758-3p	mmu-miR-758-3p	186.9	0.425591	8.4527	3.5127
hsa-miR-9-5p	mmu-miR-9-5p	106.006	74.0528	-0.0840914	-0.0085142
hsa-miR-92a-3p	mmu-miR-92a-3p	22591.1	9582.05	0.744365	0.63574
hsa-miR-92b-3p	mmu-miR-92b-3p	3742.56	213.779	3.68383	12.3238
hsa-miR-93-5p	mmu-miR-93-5p	670.841	1738.96	-1.87519	-2.18271
hsa-miR-96-5p	mmu-miR-96-5p	98.889	24.6843	1.44185	0.132793
hsa-miR-98-5p	mmu-miR-98-5p	1440.73	1055.3	-0.0409585	-0.0128334
hsa-miR-99a-5p	mmu-miR-99a-5p	587.614	196.931	1.02675	0.249822
hsa-miR-99b-5p	mmu-miR-99b-5p	21102.9	4322.3	1.81349	4.82352

## Sheet: TableS11b
Differential miRNA expression analysis, sRNA sequencing data, rat vs human, Aortic Smooth Muscle Cells
miRNA, human	miRNA, rat	cpm, human, Aortic Smooth Muscle Cells	cpm, rat, Aortic Smooth Muscle Cells	log2(foldchange)	-log10(pvalue)*sign
hsa-let-7a-5p	rno-let-7a-5p	38094.9	7349.67	2.26265	5.29632
hsa-let-7b-5p	rno-let-7b-5p	4562.99	2961.14	0.536566	0.678299
hsa-let-7c-5p	rno-let-7c-5p	854.626	9765.96	-3.74198	-6.63273
hsa-let-7d-5p	rno-let-7d-5p	977.845	2181.88	-1.26557	-2.49132
hsa-let-7e-5p	rno-let-7e-5p	2996.98	1636.98	0.752043	0.888669
hsa-let-7f-5p	rno-let-7f-5p	27266.3	38308.4	-0.580286	-0.714029
hsa-let-7g-5p	rno-let-7g-5p	3216.47	2556.99	0.200963	0.141391
hsa-let-7i-5p	rno-let-7i-5p	20709.4	13253.2	0.587203	0.798559
hsa-miR-100-5p	rno-miR-100-5p	226153	37616.7	2.55365	3.34981
hsa-miR-101-3p	rno-miR-101a-3p	1064.42	4377.59	-2.21101	-4.60805
hsa-miR-103a-3p	rno-miR-103-3p	3453.61	2115.23	0.653472	0.950383
hsa-miR-10a-5p	rno-miR-10a-5p	14143.3	50211	-2.04337	-2.44302
hsa-miR-10b-5p	rno-miR-10b-5p	3556.18	16589	-2.57751	-0.888669
hsa-miR-125a-5p	rno-miR-125a-5p	8554	8691.29	-0.154898	-0.108277
hsa-miR-125b-5p	rno-miR-125b-5p	19750.7	52130.9	-1.52572	-1.45839
hsa-miR-126-5p	rno-miR-126a-5p	364.047	144.952	1.17647	0.868938
hsa-miR-127-3p	rno-miR-127-3p	17744.1	57.7193	8.3815	14.3566
hsa-miR-128-3p	rno-miR-128-3p	835.971	577.448	0.567321	0.399149
hsa-miR-130a-3p	rno-miR-130a-3p	1476.71	4895.74	-1.79858	-6.00543
hsa-miR-130b-3p	rno-miR-130b-3p	488.951	2.33899	7.6225	14.0595
hsa-miR-132-3p	rno-miR-132-3p	103.115	201.957	-0.978801	-0.603639
hsa-miR-134-5p	rno-miR-134-5p	161.232	1.1628	7.1388	6.38614
hsa-miR-136-3p	rno-miR-136-3p	1053.89	1.23164	9.86957	14.5772
hsa-miR-138-5p	rno-miR-138-5p	2026.4	74.2061	4.7188	4.1155
hsa-miR-140-3p	rno-miR-140-3p	819.659	4838.56	-2.59812	-6.59597
hsa-miR-141-3p	rno-miR-141-3p	804.159	3.20267	7.73307	0
hsa-miR-143-3p	rno-miR-143-3p	11103.8	147933	-3.61799	-5.54987
hsa-miR-145-5p	rno-miR-145-5p	249.464	1695.09	-2.62101	-2.79049
hsa-miR-146a-5p	rno-miR-146a-5p	933.56	2602.41	-1.50584	-0.563381
hsa-miR-146b-5p	rno-miR-146b-5p	73.4513	10457.4	-7.47443	0
hsa-miR-148a-3p	rno-miR-148a-3p	3840.14	10519.8	-1.67715	-1.17834
hsa-miR-148b-3p	rno-miR-148b-3p	1261.45	1261.95	-0.0262335	-0.0203137
hsa-miR-149-5p	rno-miR-149-5p	863.494	317.7	1.35725	1.18091
hsa-miR-150-5p	rno-miR-150-5p	6.86696	65.0079	-3.22701	-1.27852
hsa-miR-151a-5p	rno-miR-151-5p	9516.44	2082.77	2.11556	5.54202
hsa-miR-152-3p	rno-miR-152-3p	366.288	1156.25	-1.67114	-2.44302
hsa-miR-155-5p	rno-miR-155-5p	2172.57	214.925	3.22749	5.2982
hsa-miR-15b-5p	rno-miR-15b-5p	228.774	509.997	-1.29651	-1.5667
hsa-miR-16-5p	rno-miR-16-5p	3685.44	6326.23	-0.833605	-0.888669
hsa-miR-17-5p	rno-miR-17-5p	383.097	170.108	1.10181	0.688555
hsa-miR-181a-5p	rno-miR-181a-5p	12974.7	8469.24	0.594876	0.617107
hsa-miR-181b-5p	rno-miR-181b-5p	2894.6	1370.52	1.08881	1.29721
hsa-miR-181c-5p	rno-miR-181c-5p	220.796	350.314	-0.771872	-0.631153
hsa-miR-181d-5p	rno-miR-181d-5p	42.2699	110.062	-1.36196	-0.714029
hsa-miR-182-5p	rno-miR-182	1844.87	256.6	2.69911	0
hsa-miR-183-5p	rno-miR-183-5p	558.248	44.3165	3.49781	0
hsa-miR-184	rno-miR-184	74.8852	0.801112	6.15904	0
hsa-miR-186-5p	rno-miR-186-5p	6429.71	4060.04	0.556551	0.552665
hsa-miR-18a-5p	rno-miR-18a-5p	102.803	45.9694	1.06828	0.378661
hsa-miR-191-5p	rno-miR-191a-5p	9405.69	16073.8	-0.802988	-0.711382
hsa-miR-192-5p	rno-miR-192-5p	506.788	343.28	0.434362	0.364359
hsa-miR-193a-3p	rno-miR-193a-3p	756.642	1362.84	-0.712531	-0.237673
hsa-miR-193b-3p	rno-miR-193b-3p	422.329	43.8002	3.17203	5.53922
hsa-miR-195-5p	rno-miR-195-5p	46.2386	129.145	-1.59539	-0.950383
hsa-miR-196b-5p	rno-miR-196b-5p	46.7157	2.90068	3.66483	0
hsa-miR-199a-3p	rno-miR-199a-3p	6731.36	18850.5	-1.49784	-3.07048
hsa-miR-19a-3p	rno-miR-19a-3p	207.364	82.3575	1.22082	0.676706
hsa-miR-19b-3p	rno-miR-19b-3p	463.824	247.654	0.803431	0.568931
hsa-miR-200a-3p	rno-miR-200a-3p	88.0238	0.00177751	8.42273	0
hsa-miR-200b-3p	rno-miR-200b-3p	1124.67	3.85855	8.04445	0
hsa-miR-200c-3p	rno-miR-200c-3p	484.158	0.798593	9.12081	0
hsa-miR-203a-3p	rno-miR-203a-3p	76.3904	3.63794	4.17214	0
hsa-miR-204-5p	rno-miR-204-5p	1044.68	313.869	1.54964	0.678299
hsa-miR-205-5p	rno-miR-205	11600.5	0.364654	14.8365	0
hsa-miR-20a-5p	rno-miR-20a-5p	395.458	131.934	1.49847	0.848854
hsa-miR-21-5p	rno-miR-21-5p	112943	125927	-0.218624	-0.168835
hsa-miR-210-3p	rno-miR-210-3p	463.348	463.229	-0.164433	-0.0893423
hsa-miR-212-5p	rno-miR-212-5p	12.0615	106.196	-3.1905	-3.31982
hsa-miR-214-3p	rno-miR-214-3p	143.239	1620.93	-3.52852	-10.2702
hsa-miR-218-5p	rno-miR-218a-5p	185.244	85.0348	1.0158	0.688555
hsa-miR-22-3p	rno-miR-22-3p	126233	142369	-0.157169	-0.0927445
hsa-miR-221-3p	rno-miR-221-3p	9774.63	3854.57	1.18862	1.18603
hsa-miR-222-3p	rno-miR-222-3p	16050.2	5885.49	1.40252	2.44302
hsa-miR-224-5p	rno-miR-224-5p	1425.69	187.012	2.92609	3.82758
hsa-miR-23a-3p	rno-miR-23a-3p	2574.69	2140.14	0.165906	0.134975
hsa-miR-23b-3p	rno-miR-23b-3p	1444.13	1520.11	-0.180462	-0.102095
hsa-miR-24-3p	rno-miR-24-3p	599.104	1243.69	-1.22043	-1.09315
hsa-miR-25-3p	rno-miR-25-3p	1433.99	1707.15	-0.39593	-0.378661
hsa-miR-26a-5p	rno-miR-26a-5p	19443.4	21753.2	-0.218527	-0.229515
hsa-miR-26b-5p	rno-miR-26b-5p	1920.52	1280.41	0.553281	0.563257
hsa-miR-27a-3p	rno-miR-27a-3p	6770.01	2523.05	1.33017	2.05375
hsa-miR-27b-3p	rno-miR-27b-3p	30785.9	25249.5	0.168206	0.106783
hsa-miR-28-3p	rno-miR-28-3p	3125.07	3405.78	-0.214029	-0.178642
hsa-miR-299-3p	rno-miR-299a-3p,rno-miR-299b-3p	89.051	0	8.5786	4.78694
hsa-miR-29a-3p	rno-miR-29a-3p	11305.4	8671.53	0.30152	0.227542
hsa-miR-29b-3p	rno-miR-29b-3p	428.086	621.444	-0.682466	-0.30518
hsa-miR-29c-3p	rno-miR-29c-3p	243.482	125.771	0.832091	0.678299
hsa-miR-301a-3p	rno-miR-301a-3p	351.511	1509.42	-2.15279	-2.27512
hsa-miR-301b-3p	rno-miR-301b-3p	79.8913	1.53553	5.63967	3.53384
hsa-miR-30a-5p	rno-miR-30a-5p	10361.9	9973.77	0.129732	0.0674405
hsa-miR-30c-5p	rno-miR-30c-5p	1881.08	3015.31	-0.708411	-0.702283
hsa-miR-30d-5p	rno-miR-30d-5p	3587.97	5409.33	-0.651668	-0.839385
hsa-miR-30e-5p	rno-miR-30e-5p	3328.26	4806.79	-0.546151	-0.445545
hsa-miR-31-5p	rno-miR-31a-5p	18867.1	16070.9	0.236444	0.134975
hsa-miR-320a	rno-miR-320-3p	1668.13	595.214	1.34148	1.28813
hsa-miR-323a-3p	rno-miR-323-3p	146.827	0	9.41619	6.2914
hsa-miR-328-3p	rno-miR-328a-3p	62.8286	188.264	-1.59875	-0.991199
hsa-miR-330-5p	rno-miR-330-5p	106.685	92.7851	0.19482	0.0765244
hsa-miR-331-3p	rno-miR-331-3p	569.699	64.0218	3.11875	7.72306
hsa-miR-339-3p	rno-miR-339-3p	148.566	23.6783	2.61519	2.8122
hsa-miR-340-5p	rno-miR-340-5p	283.874	143.436	0.924699	0.725686
hsa-miR-342-3p	rno-miR-342-3p	321.39	142.047	1.0171	0.714029
hsa-miR-34a-5p	rno-miR-34a-5p	282.381	255.039	0.0642423	0.0415534
hsa-miR-34b-5p	rno-miR-34b-5p	16.8443	158.525	-3.33032	-1.45839
hsa-miR-34c-5p	rno-miR-34c-5p	220.664	3770.96	-4.18946	-6.38614
hsa-miR-361-5p	rno-miR-361-5p	202.382	96.5803	1.01441	0.838093
hsa-miR-365a-3p,hsa-miR-365b-3p	rno-miR-365-3p	216.789	388.945	-0.9413	-0.56859
hsa-miR-369-3p	rno-miR-369-3p	209.294	0.729309	8.04061	6.2198
hsa-miR-370-3p	rno-miR-370-3p	139.088	0.433494	8.36278	5.60419
hsa-miR-375	rno-miR-375-3p	59.2714	0.436458	6.90378	0
hsa-miR-376a-5p	rno-miR-376a-5p	147.222	0.433494	8.40857	5.79976
hsa-miR-376c-3p	rno-miR-376c-3p	211.827	0	9.94921	7.69093
hsa-miR-377-5p	rno-miR-377-5p	73.9588	0	8.42814	4.1155
hsa-miR-378a-3p	rno-miR-378a-3p	1835.62	434.847	1.86755	1.28813
hsa-miR-379-3p	rno-miR-379-3p	52.7616	0.869202	6.06025	2.62517
hsa-miR-381-3p	rno-miR-381-3p	1642.56	4.28776	8.7601	14.7744
hsa-miR-382-5p	rno-miR-382-5p	94.4249	0.436458	7.76641	4.60805
hsa-miR-409-3p	rno-miR-409a-3p	2761.19	4.56192	9.40842	17.6207
hsa-miR-410-3p	rno-miR-410-3p	984.566	4.12842	8.08984	10.5315
hsa-miR-411-5p	rno-miR-411-5p	1958.4	19.3271	6.7968	10.2702
hsa-miR-421	rno-miR-421-3p	195.346	350.185	-0.989137	-0.779555
hsa-miR-423-3p	rno-miR-423-3p	4133.72	1764.28	1.1927	2.27512
hsa-miR-424-5p	rno-miR-322-5p	234.038	1240.85	-2.47635	-1.28519
hsa-miR-425-5p	rno-miR-425-5p	243.037	213.122	0.176205	0.0893423
hsa-miR-429	rno-miR-429	133.849	1.09396	6.83299	0
hsa-miR-431-5p	rno-miR-431	224.729	2.09863	6.81898	6.27661
hsa-miR-450a-5p	rno-miR-450b-5p	100.084	349.627	-1.9066	-2.02756
hsa-miR-455-5p	rno-miR-455-5p	126.784	36.8513	1.75672	0.950383
hsa-miR-487b-3p	rno-miR-487b-3p	395.857	1.73398	7.94106	7.72306
hsa-miR-493-5p	rno-miR-493-5p	122.291	0.364654	8.11003	5.53922
hsa-miR-494-3p	rno-miR-494-3p	164.594	0.433494	8.66069	5.78031
hsa-miR-495-3p	rno-miR-495	83.2612	0	8.52783	4.4845
hsa-miR-497-5p	rno-miR-497-5p	102.169	182.464	-0.91214	-0.356342
hsa-miR-501-3p	rno-miR-501-3p	282.598	77.3772	1.8054	1.3256
hsa-miR-505-3p	rno-miR-505-3p	119.774	66.0783	0.867364	0.395405
hsa-miR-532-5p	rno-miR-532-5p	556.803	181.368	1.57811	1.58826
hsa-miR-542-3p	rno-miR-542-3p	20.7673	290.065	-3.83144	-6.0916
hsa-miR-543	rno-miR-543-3p	79.7599	0	8.429	4.18715
hsa-miR-615-3p	rno-miR-615-3p	50.6615	301.156	-2.93321	-1.27852
hsa-miR-671-3p	rno-miR-671	128.506	81.093	0.632687	0.353461
hsa-miR-7-5p	rno-miR-7a-5p	14.3305	104.64	-3.18469	-1.81514
hsa-miR-708-5p	rno-miR-708-5p	111.642	2.61875	5.20319	2.0653
hsa-miR-744-5p	rno-miR-744-5p	236.884	1031.94	-2.07289	-2.25055
hsa-miR-758-3p	rno-miR-758-3p	186.9	0.364654	8.87322	5.71276
hsa-miR-9-5p	rno-miR-9a-5p	106.006	5.59593	3.93212	0
hsa-miR-92a-3p	rno-miR-92a-3p	22591.1	11880.2	0.797835	1.03215
hsa-miR-92b-3p	rno-miR-92b-3p	3742.56	133.79	4.74978	22.2443
hsa-miR-93-5p	rno-miR-93-5p	670.841	696.693	-0.129064	-0.0766356
hsa-miR-96-5p	rno-miR-96-5p	98.889	7.04862	3.71469	0
hsa-miR-98-5p	rno-miR-98-5p	1440.73	1108.67	0.222019	0.118588
hsa-miR-99a-5p	rno-miR-99a-5p	587.614	1888.37	-1.97868	-1.53928
hsa-miR-99b-5p	rno-miR-99b-5p	21102.9	40751.1	-1.09716	-1.16053

## Sheet: TableS11c
Differential miRNA expression analysis, sRNA sequencing data, dog vs human, Aortic Smooth Muscle Cells
miRNA, human	miRNA, dog	cpm, human, Aortic Smooth Muscle Cells	cpm, dog, Aortic Smooth Muscle Cells	log2(foldchange)	-log10(pvalue)*sign
hsa-let-7a-5p	cfa-let-7a	38094.9	12333.9	0.805119	1.55252
hsa-let-7b-5p	cfa-let-7b	4562.99	1572.69	0.691358	0.972067
hsa-let-7c-5p	cfa-let-7c	854.626	476.618	-0.0899815	-0.0414932
hsa-let-7d-5p	cfa-let-7d-5p	977.845	520.949	0.0621465	0.0527416
hsa-let-7e-5p	cfa-let-7e	2996.98	1205.51	0.450427	0.557719
hsa-let-7f-5p	cfa-let-7f	27266.3	30386.5	-0.992962	-2.36873
hsa-let-7g-5p	cfa-let-7g	3216.47	11415.3	-2.67824	-19.131
hsa-miR-101-3p	cfa-miR-101	1064.42	3213.01	-2.49252	-8.79368
hsa-miR-103a-3p	cfa-miR-103	3453.61	1764.35	0.144427	0.120199
hsa-miR-10a-5p	cfa-miR-10a	14143.3	11297.1	-0.541963	-0.650072
hsa-miR-10b-5p	cfa-miR-10b	3556.18	9317.93	-2.51301	-0.546921
hsa-miR-1185-1-3p	cfa-miR-1185	86.8192	3.06789	4.30825	3.38168
hsa-miR-125a-5p	cfa-miR-125a	8554	6051.59	-0.398593	-0.31097
hsa-miR-125b-5p	cfa-miR-125b	19750.7	23462.1	-1.06328	-1.45047
hsa-miR-126-5p	cfa-miR-126	364.047	7.16021	4.76293	8.59735
hsa-miR-127-3p	cfa-miR-127	17744.1	629.163	4.1752	7.73311
hsa-miR-1271-5p	cfa-miR-1271	171.315	983.039	-3.25353	-7.78685
hsa-miR-128-3p	cfa-miR-128	835.971	568.777	-0.138063	-0.074344
hsa-miR-1307-5p	cfa-miR-1307-5p	820.909	415.716	0.140885	0.0818365
hsa-miR-130a-3p	cfa-miR-130a	1476.71	1375.77	-0.672584	-1.06673
hsa-miR-130b-3p	cfa-miR-130b	488.951	69.5719	2.08058	2.79823
hsa-miR-132-3p	cfa-miR-132	103.115	23.528	1.28568	0.901802
hsa-miR-133a-3p	cfa-miR-133a,cfa-miR-133c	2.28409	1350.78	-10.0808	-34.8906
hsa-miR-134-5p	cfa-miR-134	161.232	0	8.99483	7.47772
hsa-miR-1343-3p	cfa-miR-1343	25.5109	101.723	-2.91788	-1.83068
hsa-miR-136-3p	cfa-miR-136-3p	1053.89	25.7766	4.76057	9.86579
hsa-miR-138-5p	cfa-miR-138a	2026.4	26.7216	5.39181	6.52749
hsa-miR-140-3p	cfa-miR-140	819.659	9290.3	-4.23929	-14.7916
hsa-miR-141-3p	cfa-miR-141	804.159	0.204455	10.4869	0
hsa-miR-143-3p	cfa-miR-143	11103.8	363552	-5.72456	-13.1777
hsa-miR-145-5p	cfa-miR-145	249.464	2673.24	-4.05032	-7.47772
hsa-miR-146a-5p	cfa-miR-146a	933.56	2.74588	7.84136	13.6672
hsa-miR-146b-5p	cfa-miR-146b	73.4513	64.3421	-0.788866	-0.227273
hsa-miR-148a-3p	cfa-miR-148a	3840.14	12922.9	-2.68323	-2.79874
hsa-miR-148b-3p	cfa-miR-148b	1261.45	1272.75	-0.742169	-0.719213
hsa-miR-149-5p	cfa-miR-149	863.494	100.958	2.31805	3.05832
hsa-miR-151a-5p	cfa-miR-151	9516.44	6049.23	-0.149968	-0.101145
hsa-miR-152-3p	cfa-miR-152	366.288	426.733	-0.95379	-1.03916
hsa-miR-155-5p	cfa-miR-155	2172.57	240.857	2.48549	2.62279
hsa-miR-15a-5p	cfa-miR-15a	423.347	563.538	-1.26593	-1.4592
hsa-miR-15b-5p	cfa-miR-15b	228.774	150.286	-0.182871	-0.0920432
hsa-miR-16-5p	cfa-miR-16	3685.44	3571.19	-0.743993	-1.01289
hsa-miR-17-5p	cfa-miR-17-5p	383.097	66.0362	1.83828	1.19077
hsa-miR-181a-5p	cfa-miR-181a	12974.7	9207.53	-0.38432	-0.203066
hsa-miR-181b-5p	cfa-miR-181b	2894.6	1141.05	0.589241	0.602095
hsa-miR-181c-5p	cfa-miR-181c	220.796	1986.31	-4.11561	-13.4194
hsa-miR-181d-5p	cfa-miR-181d	42.2699	256.593	-3.32316	-7.17915
hsa-miR-182-5p	cfa-miR-182	1844.87	811.056	0.147293	0
hsa-miR-183-5p	cfa-miR-183	558.248	181.518	0.620529	0
hsa-miR-184	cfa-miR-184	74.8852	0.816882	5.49326	0
hsa-miR-186-5p	cfa-miR-186	6429.71	9007.26	-1.3293	-2.30919
hsa-miR-18a-5p	cfa-miR-18a	102.803	23.1399	1.39212	0.514311
hsa-miR-191-5p	cfa-miR-191	9405.69	6756.27	-0.310307	-0.188654
hsa-miR-192-5p	cfa-miR-192	506.788	183.448	0.523679	0.33625
hsa-miR-193a-3p	cfa-miR-193a-3p	756.642	1826.04	-1.94224	-1.37986
hsa-miR-193b-3p	cfa-miR-193b-3p	422.329	188.676	0.339354	0.230069
hsa-miR-195-5p	cfa-miR-195	46.2386	75.4807	-1.50069	-0.615772
hsa-miR-196b-5p	cfa-miR-196b	46.7157	1.13772	4.39117	0
hsa-miR-197-3p	cfa-miR-197	430.547	351.814	-0.471439	-0.368336
hsa-miR-199a-3p	cfa-miR-199	6731.36	10869.6	-1.44999	-3.80412
hsa-miR-19a-3p	cfa-miR-19a	207.364	61.3563	0.977024	0.481039
hsa-miR-19b-3p	cfa-miR-19b	463.824	212.875	0.313792	0.16028
hsa-miR-200a-3p	cfa-miR-200a-3p	88.0238	0.000135235	7.84161	0
hsa-miR-200b-3p	cfa-miR-200b-3p	1124.67	0.940035	9.37603	0
hsa-miR-200c-3p	cfa-miR-200c	484.158	0	23.5878	0
hsa-miR-203a-3p	cfa-miR-203	76.3904	5.15255	2.99238	0
hsa-miR-204-5p	cfa-miR-204	1044.68	1305.73	-1.21497	-0.510914
hsa-miR-205-5p	cfa-miR-205	11600.5	2.57824	10.8556	0
hsa-miR-20a-5p	cfa-miR-20a	395.458	60.7502	1.93687	1.35285
hsa-miR-21-5p	cfa-miR-21	112943	124642	-0.963257	-1.83068
hsa-miR-210-3p	cfa-miR-210	463.348	605.657	-1.22687	-1.80939
hsa-miR-214-3p	cfa-miR-214	143.239	415.071	-2.2476	-4.09912
hsa-miR-218-5p	cfa-miR-218	185.244	16.2819	2.67249	3.38168
hsa-miR-22-3p	cfa-miR-22	126233	111293	-0.613695	-0.587919
hsa-miR-221-3p	cfa-miR-221	9774.63	969.728	2.45743	5.70102
hsa-miR-222-3p	cfa-miR-222	16050.2	1268.61	2.83452	12.7488
hsa-miR-224-5p	cfa-miR-224	1425.69	61.085	4.06708	5.43812
hsa-miR-23a-3p	cfa-miR-23a	2574.69	2066.52	-0.543106	-0.67598
hsa-miR-23b-3p	cfa-miR-23b	1444.13	2406.24	-1.56523	-2.39426
hsa-miR-24-3p	cfa-miR-24	599.104	1258.69	-1.97757	-4.73864
hsa-miR-25-3p	cfa-miR-25	1433.99	752.681	0.103428	0.0677594
hsa-miR-26a-5p	cfa-miR-26a	19443.4	13152.2	-0.251499	-0.271251
hsa-miR-26b-5p	cfa-miR-26b	1920.52	840.567	0.405182	0.546921
hsa-miR-27a-3p	cfa-miR-27a	6770.01	2630.5	0.483366	0.546358
hsa-miR-27b-3p	cfa-miR-27b	30785.9	85377.1	-2.36493	-4.23324
hsa-miR-28-3p	cfa-miR-28	3125.07	10557.1	-2.57668	-6.82388
hsa-miR-299-3p	cfa-miR-299-3p	89.051	1.59552	5.28878	3.84003
hsa-miR-29a-3p	cfa-miR-29a	11305.4	6360.42	0.0517063	0.0414932
hsa-miR-29b-3p	cfa-miR-29b	428.086	262.991	-0.149101	-0.0638499
hsa-miR-29c-3p	cfa-miR-29c	243.482	143.477	-0.222809	-0.0948114
hsa-miR-301a-3p	cfa-miR-301a	351.511	748.278	-1.93449	-2.71351
hsa-miR-301b-3p	cfa-miR-301b	79.8913	56.0903	-0.21343	-0.0754694
hsa-miR-30a-5p	cfa-miR-30a	10361.9	5312.77	0.112595	0.0434111
hsa-miR-30b-5p	cfa-miR-30b	605.983	1704.93	-2.45602	-4.48148
hsa-miR-30c-5p	cfa-miR-30c	1881.08	1260.56	-0.264672	-0.221054
hsa-miR-30d-5p	cfa-miR-30d	3587.97	12250.9	-2.67637	-7.78685
hsa-miR-30e-5p	cfa-miR-30e-5p	3328.26	3429.31	-0.862008	-0.925426
hsa-miR-31-5p	cfa-miR-31	18867.1	4.3421	11.4182	38.173
hsa-miR-320a	cfa-miR-320	1668.13	1004.55	-0.101139	-0.0754694
hsa-miR-323a-3p	cfa-miR-323	146.827	0.20459	7.9527	5.70232
hsa-miR-330-5p	cfa-miR-330	106.685	117.296	-0.904871	-0.703985
hsa-miR-331-3p	cfa-miR-331	569.699	396.721	-0.240474	-0.187682
hsa-miR-340-5p	cfa-miR-340	283.874	562.291	-1.83557	-4.23324
hsa-miR-342-3p	cfa-miR-342	321.39	45.9467	1.86618	1.97845
hsa-miR-345-5p	cfa-miR-345-5p	241.471	9.11381	4.00348	6.11165
hsa-miR-34a-5p	cfa-miR-34a	282.381	194.02	-0.365141	-0.220641
hsa-miR-34c-5p	cfa-miR-34c	220.664	2.7431	5.25117	4.69417
hsa-miR-361-5p	cfa-miR-361	202.382	77.9664	0.596207	0.514311
hsa-miR-365a-3p,hsa-miR-365b-3p	cfa-miR-365	216.789	331.894	-1.41527	-1.99959
hsa-miR-369-3p	cfa-miR-369	209.294	4.05112	5.08846	5.56204
hsa-miR-370-3p	cfa-miR-370	139.088	1.34922	6.0347	5.85869
hsa-miR-375	cfa-miR-375	59.2714	1.39241	4.45558	0
hsa-miR-376a-5p	cfa-miR-376a-1-5p	147.222	3.27396	4.74406	5.42776
hsa-miR-376c-3p	cfa-miR-376c-3p	211.827	3.11256	5.40638	5.83845
hsa-miR-377-5p	cfa-miR-377	73.9588	0	7.91633	4.47086
hsa-miR-378a-3p	cfa-miR-378	1835.62	1533.58	-0.690461	-0.315309
hsa-miR-381-3p	cfa-miR-381	1642.56	128.303	3.17585	3.36403
hsa-miR-382-5p	cfa-miR-382-5p	94.4249	1.47237	5.42679	4.78988
hsa-miR-409-3p	cfa-miR-409	2761.19	74.8654	4.62114	8.11585
hsa-miR-410-3p	cfa-miR-410	984.566	44.9019	3.97664	4.78988
hsa-miR-411-5p	cfa-miR-411	1958.4	179.584	2.84447	4.70167
hsa-miR-421	cfa-miR-421	195.346	158.364	-0.565909	-0.321209
hsa-miR-423-3p	cfa-miR-423a-3p	4133.72	2124	0.208009	0.172178
hsa-miR-424-5p	cfa-miR-424-5p	234.038	26.5289	2.38466	0
hsa-miR-425-5p	cfa-miR-425	243.037	51.2493	1.38596	1.57496
hsa-miR-429	cfa-miR-429	133.849	0.20459	7.48373	0
hsa-miR-432-5p	cfa-miR-432	142.899	9.40331	3.34731	3.05832
hsa-miR-450a-5p	cfa-miR-450a	100.084	72.6255	-0.304176	-0.10124
hsa-miR-454-3p	cfa-miR-454	138.746	22.1778	1.81923	2.07229
hsa-miR-455-5p	cfa-miR-455	126.784	59.9227	0.301428	0.116684
hsa-miR-486-5p	cfa-miR-486	94.4699	42.1275	0.336147	0.145056
hsa-miR-487b-3p	cfa-miR-487b	395.857	9.9917	4.71721	5.89638
hsa-miR-494-3p	cfa-miR-494	164.594	4.25719	4.67104	4.61182
hsa-miR-495-3p	cfa-miR-495	83.2612	2.28925	4.57782	3.76509
hsa-miR-497-5p	cfa-miR-497	102.169	73.6144	-0.218608	-0.0578746
hsa-miR-500a-3p	cfa-miR-500	591.505	459.964	-0.356086	-0.203066
hsa-miR-505-3p	cfa-miR-505-3p	119.774	47.9295	0.627169	0.319397
hsa-miR-532-5p	cfa-miR-532	556.803	179.254	0.911857	0.619533
hsa-miR-543	cfa-miR-543	79.7599	1.22458	5.66102	2.72729
hsa-miR-615-3p	cfa-miR-615-3p	50.6615	30.9747	-0.368185	-0.0754694
hsa-miR-660-5p	cfa-miR-660	485.871	257.088	0.0604644	0.0286498
hsa-miR-671-3p	cfa-miR-671	128.506	23.0702	1.79522	1.67138
hsa-miR-708-5p	cfa-miR-708	111.642	0.532333	6.62437	4.84328
hsa-miR-758-3p	cfa-miR-758	186.9	1.84331	6.14934	4.79694
hsa-miR-769-5p	cfa-miR-769-5p	711.888	120.502	1.86716	3.08194
hsa-miR-874-3p	cfa-miR-874	23.2613	100.383	-3.04175	-3.54568
hsa-miR-889-3p	cfa-miR-889	303.789	17.4365	3.53427	4.23324
hsa-miR-9-5p	cfa-miR-9	106.006	12.2363	2.24243	0
hsa-miR-92a-3p	cfa-miR-92a	22591.1	6402.21	1.05164	1.24467
hsa-miR-92b-3p	cfa-miR-92b	3742.56	15.7574	7.11088	53.5268
hsa-miR-93-5p	cfa-miR-93	670.841	391.724	-0.0218424	-0.015685
hsa-miR-96-5p	cfa-miR-96	98.889	19.1943	1.37168	0
hsa-miR-98-5p	cfa-miR-98	1440.73	900.355	-0.218412	-0.149283
hsa-miR-99a-5p	cfa-miR-99a	587.614	2359.46	-2.93065	-4.20628
hsa-miR-99b-5p	cfa-miR-99b	21102.9	17823.7	-0.64552	-0.738174

## Sheet: TableS11d
Differential miRNA expression analysis, sRNA sequencing data, chicken vs human, Aortic Smooth Muscle Cells
miRNA, human	miRNA, chicken	cpm, human, Aortic Smooth Muscle Cells	cpm, chicken, Aortic Smooth Muscle Cells	log2(foldchange)	-log10(pvalue)*sign
hsa-let-7a-5p	gga-let-7a-5p,gga-let-7j-5p	38094.9	9259.21	1.8611	8.17213
hsa-let-7b-5p	gga-let-7b	4562.99	812.271	2.30545	9.56371
hsa-let-7c-5p	gga-let-7c-5p	854.626	1752.01	-1.25695	-0.967541
hsa-let-7d-5p	gga-let-7d	977.845	44.6091	4.2283	15.486
hsa-let-7f-5p	gga-let-7f-5p	27266.3	19209	0.408422	0.485819
hsa-let-7g-5p	gga-let-7g-5p	3216.47	1534.84	0.783511	0.963546
hsa-let-7i-5p	gga-let-7i	20709.4	3305.83	2.54897	10.7306
hsa-miR-100-5p	gga-miR-100-5p	226153	45964.4	2.15643	3.96245
hsa-miR-101-3p	gga-miR-101-3p	1064.42	2642.07	-1.62114	-2.49888
hsa-miR-103a-3p	gga-miR-103-3p	3453.61	2249.9	0.424725	0.498499
hsa-miR-107	gga-miR-107-3p	54.4518	194.285	-2.1727	-1.69806
hsa-miR-10a-5p	gga-miR-10a-5p	14143.3	421.99	4.68327	13.6047
hsa-miR-10b-5p	gga-miR-10b-5p	3556.18	46.287	6.12393	4.78973
hsa-miR-125b-5p	gga-miR-125b-5p	19750.7	11350.1	0.599359	0.497578
hsa-miR-126-5p	gga-miR-126-5p	364.047	6.14355	5.82944	7.63206
hsa-miR-128-3p	gga-miR-128-3p	835.971	2655.71	-1.74417	-2.82273
hsa-miR-130a-3p	gga-miR-130c-3p	1476.71	1397.9	-0.147474	-0.128728
hsa-miR-130b-3p	gga-miR-130b-3p	488.951	338.35	0.444036	0.291214
hsa-miR-133a-3p	gga-miR-133a-3p,gga-miR-133c-3p	2.28409	223.932	-6.89794	-9.6366
hsa-miR-138-5p	gga-miR-138-5p	2026.4	1202.38	0.673265	0.243521
hsa-miR-140-3p	gga-miR-140-3p	819.659	8689.81	-3.59945	-10.78
hsa-miR-143-3p	gga-miR-143-3p	11103.8	492724	-5.62858	-13.2329
hsa-miR-145-5p	gga-miR-145-5p	249.464	4826.96	-4.40789	-8.38069
hsa-miR-146a-5p	gga-miR-146a-5p	933.56	9.42929	6.37867	8.38069
hsa-miR-146b-5p	gga-miR-146b-5p	73.4513	36.098	0.589067	0.15538
hsa-miR-148a-3p	gga-miR-148a-3p	3840.14	77750.8	-4.80638	-9.38548
hsa-miR-148b-3p	gga-miR-148b-3p	1261.45	1484.56	-0.576151	-0.261526
hsa-miR-153-3p	gga-miR-153-3p	1.79819	89.1007	-5.60853	-3.76307
hsa-miR-155-5p	gga-miR-155	2172.57	0.1873	12.6148	17.3124
hsa-miR-15a-5p	gga-miR-15a	423.347	268.673	0.462315	0.249239
hsa-miR-15b-5p	gga-miR-15b-5p	228.774	622.439	-1.83419	-1.1847
hsa-miR-16-5p	gga-miR-16-5p	3685.44	504.152	2.85098	6.97404
hsa-miR-17-5p	gga-miR-17-5p	383.097	128.816	1.37458	1.13691
hsa-miR-181a-5p	gga-miR-181a-5p	12974.7	9342.25	0.422136	0.378261
hsa-miR-181b-5p	gga-miR-181b-5p	2894.6	2568.16	0.101698	0.0857794
hsa-miR-182-5p	gga-miR-182-5p	1844.87	329.594	2.00842	0
hsa-miR-183-5p	gga-miR-183	558.248	71.1209	2.41895	0
hsa-miR-184	gga-miR-184-3p	74.8852	0.374599	7.15123	0
hsa-miR-18a-5p	gga-miR-18a-5p	102.803	68.9632	0.339272	0.107063
hsa-miR-191-5p	gga-miR-191-5p	9405.69	2278	1.75285	2.3178
hsa-miR-193a-3p	gga-miR-193a-3p	756.642	954.116	-0.0940721	-0.033631
hsa-miR-193b-3p	gga-miR-193b-3p	422.329	717.81	-1.12998	-0.7543
hsa-miR-199a-3p	gga-miR-199-3p	6731.36	4172.57	0.500544	0.457886
hsa-miR-19a-3p	gga-miR-19a-3p	207.364	214.328	-0.288184	-0.126605
hsa-miR-19b-3p	gga-miR-19b-3p	463.824	297.001	0.412386	0.243521
hsa-miR-200a-3p	gga-miR-200a-3p	88.0238	0	8.74113	0
hsa-miR-200b-3p	gga-miR-200b-3p	1124.67	1.33611	9.7929	0
hsa-miR-203a-3p	gga-miR-203a	76.3904	1.77493	5.27109	0
hsa-miR-204-5p	gga-miR-204	1044.68	21.9125	5.35677	5.52434
hsa-miR-205-5p	gga-miR-205a	11600.5	4.48614	11.0715	0
hsa-miR-20a-5p	gga-miR-20a-5p	395.458	104.726	1.69866	1.14984
hsa-miR-20b-5p	gga-miR-20b-5p	0.0261572	87.4809	-8.73506	-4.09517
hsa-miR-21-5p	gga-miR-21-5p	112943	63751.5	0.755598	0.967541
hsa-miR-214-3p	gga-miR-214	143.239	209.649	-0.758637	-0.382454
hsa-miR-215-5p	gga-miR-215-5p	14.7355	109.938	-3.02367	-2.49601
hsa-miR-218-5p	gga-miR-218-5p	185.244	20.8299	3.20474	2.54959
hsa-miR-22-3p	gga-miR-22-3p	126233	72378.2	0.740987	1.0234
hsa-miR-221-3p	gga-miR-221-3p	9774.63	2139.41	1.91868	4.22127
hsa-miR-222-3p	gga-miR-222a	16050.2	8251.21	0.952633	0.911123
hsa-miR-23b-3p	gga-miR-23b-3p	1444.13	2313.13	-0.922049	-0.822125
hsa-miR-24-3p	gga-miR-24-3p	599.104	593.702	-0.342391	-0.194237
hsa-miR-26a-5p	gga-miR-26a-5p	19443.4	20870.8	-0.284223	-0.327985
hsa-miR-27b-3p	gga-miR-27b-3p	30785.9	9096.26	1.60054	2.7173
hsa-miR-29b-3p	gga-miR-29b-3p	428.086	275.884	0.24054	0.107063
hsa-miR-29c-3p	gga-miR-29a-3p,gga-miR-29c-3p	243.482	2013.13	-3.34327	-9.82686
hsa-miR-301a-3p	gga-miR-301b-3p	351.511	822.405	-1.24774	-0.967541
hsa-miR-301b-3p	gga-miR-301a-3p	79.8913	734.969	-3.15554	-3.76307
hsa-miR-30a-5p	gga-miR-30a-5p	10361.9	5468.22	0.914244	0.7543
hsa-miR-30b-5p	gga-miR-30b-5p	605.983	374.395	0.598436	0.427707
hsa-miR-30c-5p	gga-miR-30c-5p	1881.08	4907.84	-1.50535	-4.17085
hsa-miR-30d-5p	gga-miR-30d	3587.97	6991.86	-1.1424	-2.51214
hsa-miR-30e-5p	gga-miR-30e-5p	3328.26	5449.47	-0.862968	-1.14984
hsa-miR-31-5p	gga-miR-31-5p	18867.1	1204.05	3.84292	13.1704
hsa-miR-338-3p	gga-miR-338-3p	0.821402	319.169	-8.72563	-8.29748
hsa-miR-33a-5p	gga-miR-33-5p	22.9997	207.614	-3.57869	-2.3669
hsa-miR-34a-5p	gga-miR-34a-5p	282.381	105.006	1.175	0.950272
hsa-miR-34c-5p	gga-miR-34c-5p	220.664	1.16044	7.19181	5.932
hsa-miR-365a-3p,hsa-miR-365b-3p	gga-miR-365-3p	216.789	315.612	-0.790127	-0.497578
hsa-miR-375	gga-miR-375	59.2714	7.11937	3.08109	0
hsa-miR-383-5p	gga-miR-383-5p	0	59.598	-8.32153	-3.45795
hsa-miR-425-5p	gga-miR-425-5p	243.037	600.192	-1.48595	-2.0235
hsa-miR-429	gga-miR-429-3p	133.849	14.1024	2.95842	0
hsa-miR-454-3p	gga-miR-454-3p	138.746	1594.04	-3.57	-8.25045
hsa-miR-455-5p	gga-miR-455-5p	126.784	82.1512	0.412104	0.164896
hsa-miR-9-5p	gga-miR-9-5p	106.006	2.72333	5.1771	0
hsa-miR-92a-3p	gga-miR-92-3p	22591.1	28512.2	-0.521752	-0.544289
hsa-miR-96-5p	gga-miR-96-5p	98.889	7.93158	3.49328	0
hsa-miR-99a-5p	gga-miR-99a-5p	587.614	2103.04	-2.16753	-2.03015
