# Supplementary material for: Comparative transcriptomics of primary cells in vertebrates
Source: Genome Res. 2020 Jul;30(7):951–61. doi: 10.1101/gr.255679.119 (PMC7397866; doi:10.1101/gr.255679.119)
Supplement: Supplemental Material [file supp_gr.255679.119_Supplemental_Table_S12.xlsx]

## Sheet: README
Sheets TableS12b-TableS12e contain the curated miRNA promoter predictions in mouse (genome assembly mm9 and mm10), rat (genome assembly rn6), dog (genome assembly canFam3), and chicken (genome assembly galGal5 and galGal6). For each primary miRNA, we show the genomic location (chromosome, strand, and transcription start site) and name of the predicted promoter, the corresponding primary miRNA, th…

## Sheet: TableS12a
Primary miRNAs, human, after manual curation
Chromosome (hg19)	Strand (hg19)	TSS (hg19)	Chromosome (hg38)	Strand (hg38)	TSS (hg38)	Promoter name	Primary microRNA	Intronic/intergenic	Pre-microRNAs
chr1	-	29346	chr1	-	29346	p1@WASH7P	NR_024540	intergenic	hsa-mir-6859-1
chr1	-	569943	chr1	-	634563	p@chr1:569934..569952,-	ENST00000440200.1	intergenic	hsa-mir-6723
chr1	+	874207	chr1	+	938827	p8@SAMD11	ENST00000455979.1	intronic	hsa-novelmir-1
chr1	+	955500	chr1	+	1020120	p1@AGRN	NM_198576	intronic	hsa-novelmir-2
chr1	+	1098257	chr1	+	1162877	p@chr1:1098252..1098265,+	curation	intergenic	hsa-mir-200b,hsa-mir-200a,hsa-mir-429
chr1	-	1141961	chr1	-	1206581	p1@TNFRSF18	ENST00000328596.6	intronic	hsa-novelmir-4
chr1	-	1243310	chr1	-	1307930	p1@ACAP3	NM_030649	intronic	hsa-mir-6726
chr1	-	1260040	chr1	-	1324660	p1@CPSF3L	ENST00000419704.1	intronic	hsa-mir-6727
chr1	-	1284798	chr1	-	1349418	p1@DVL1	ENST00000378888.5	intronic	hsa-mir-6808
chr1	-	1476004	chr1	-	1540624	p1@TMEM240	ENST00000425828.1	intronic	hsa-novelmir-10,hsa-novelmir-9
chr1	+	1567044	chr1	+	1631665	p4@MMP23B	ENST00000356026.5	intronic	hsa-novelmir-11
chr1	-	1590433	chr1	-	1658972	p1@uc001ahc.1	NM_033493	intronic	hsa-novelmir-12
chr1	-	1624234	chr1	-	1692795	p1@SLC35E2B	NM_001110781	intronic	hsa-novelmir-16,hsa-novelmir-15,hsa-novelmir-14,hsa-novelmir-13
chr1	-	1655773	chr1	-	1724334	p1@CDK11A,p1@CDK11B	ENST00000404249.3	intronic	hsa-novelmir-17
chr1	-	1677509	chr1	-	1746070	p1@SLC35E2	NM_001199787	intronic	hsa-novelmir-18
chr1	+	2161030	chr1	+	2229591	p@chr1:2161024..2161035,+	NM_003036	intronic	hsa-novelmir-19
chr1	+	2191999	chr1	+	2260560	p@chr1:2191996..2192000,+	ENST00000478223.2	intronic	hsa-novelmir-20,hsa-novelmir-21,hsa-novelmir-22
chr1	-	2458035	chr1	-	2526596	p1@PANK4	NM_018216	intronic	hsa-novelmir-25,hsa-novelmir-24
chr1	-	2461702	chr1	-	2530263	p1@HES5	NM_001010926	intronic	hsa-novelmir-26
chr1	+	2985767	chr1	+	3069203	p1@PRDM16	ENST00000378391.2	intronic	hsa-mir-4251
chr1	+	3371229	chr1	+	3454665	p1@ARHGEF16	NM_014448	intronic	hsa-novelmir-29
chr1	-	3528060	chr1	-	3611496	p2@MEGF6	NM_001409	intronic	hsa-mir-551a
chr1	-	3663939	chr1	-	3747375	p1@TP73-AS1	NR_033708	intergenic	hsa-novelmir-31
chr1	-	3816822	chr1	-	3900258	p1@C1orf174	ENST00000486765.1	intronic	hsa-novelmir-32
chr1	-	6259654	chr1	-	6199594	p1@RPL22	ENST00000234875.4	intronic	hsa-novelmir-33
chr1	+	6266179	chr1	+	6206119	p1@RNF207	NM_207396	intronic	hsa-novelmir-34,hsa-novelmir-35
chr1	-	6453437	chr1	-	6393377	p1@ACOT7	ENST00000545482.1	intronic	hsa-novelmir-38,hsa-novelmir-37
chr1	-	6662929	chr1	-	6602869	p1@KLHL21	NM_014851	intronic	hsa-novelmir-40
chr1	+	6685261	chr1	+	6625201	p1@THAP3	ENST00000484669.2	intronic	hsa-novelmir-41,hsa-novelmir-42,hsa-novelmir-43
chr1	-	6761866	chr1	-	6701806	p1@DNAJC11	ENST00000377573.5	intronic	hsa-novelmir-44
chr1	-	8938745	chr1	-	8878686	p1@ENO1	ENST00000234590.4	intronic	hsa-mir-6728
chr1	-	9222992	chr1	-	9162933	p@chr1:9222986..9223005,-	curation	intergenic	hsa-mir-34a
chr1	+	9242248	chr1	+	9182189	p1@ENST00000412639	ENST00000412639.2	intergenic	hsa-novelmir-48
chr1	-	9262692	chr1	-	9202633	p1@ENST00000437157	ENST00000437157.2	intergenic	hsa-novelmir-49
chr1	+	9294833	chr1	+	9234774	p1@H6PD	ENST00000377403.2	intronic	hsa-novelmir-50
chr1	+	9352953	chr1	+	9292894	p1@SPSB1	NM_025106	intronic	hsa-novelmir-51
chr1	+	9648969	chr1	+	9588911	p1@TMEM201	ENST00000340381.6	intronic	hsa-novelmir-53
chr1	+	9711789	chr1	+	9651731	p1@PIK3CD	NM_005026	intronic	hsa-novelmir-54,hsa-novelmir-55,hsa-novelmir-56,hsa-novelmir-57,hsa-novelmir-58
chr1	+	10003533	chr1	+	9943475	p1@NMNAT1	ENST00000492735.1	intronic	hsa-mir-5697
chr1	+	10270628	chr1	+	10210570	p1@KIF1B	NM_015074	intronic	hsa-mir-1273d
chr1	+	10535011	chr1	+	10474954	p1@PEX14	ENST00000538836.1	intronic	hsa-novelmir-61
chr1	-	11120075	chr1	-	11060018	p1@SRM	ENST00000459997.1	intronic	hsa-novelmir-65
chr1	+	11159487	chr1	+	11099430	p1@ENST00000435388,p1@ENST00000447600	ENST00000447600.1	intergenic	hsa-novelmir-66
chr1	+	11333265	chr1	+	11273208	p1@UBIAD1	ENST00000376810.5	intronic	hsa-novelmir-67
chr1	+	11751787	chr1	+	11691730	p1@C1orf187	ENST00000294485.5	intronic	hsa-novelmir-71,hsa-novelmir-72
chr1	+	12079558	chr1	+	12019501	p1@MIIP	ENST00000436478.2	intronic	hsa-mir-6729
chr1	+	12123360	chr1	+	12063303	p1@TNFRSF8	NM_001243	intronic	hsa-novelmir-73
chr1	+	12227048	chr1	+	12166991	p1@TNFRSF1B	NM_001066	intronic	hsa-mir-4632
chr1	-	12677793	chr1	-	12617787	p2@DHRS3	NM_004753	intronic	hsa-novelmir-79,hsa-novelmir-78,hsa-mir-6730
chr1	+	12776118	chr1	+	12716115	p1@AADACL3	NM_001103170	intronic	hsa-novelmir-80
chr1	+	16010815	chr1	+	15684320	p1@PLEKHM2	NM_015164	intronic	hsa-novelmir-82
chr1	-	16076132	chr1	-	15749637	p1@ENST00000418525	ENST00000418525.1	intergenic	hsa-novelmir-83
chr1	+	16085290	chr1	+	15758795	p1@FBLIM1	ENST00000502739.1	intronic	hsa-novelmir-84
chr1	+	16174354	chr1	+	15847859	p1@SPEN	NM_015001	intronic	hsa-novelmir-85
chr1	-	16482564	chr1	-	16156069	p1@EPHA2	NM_004431	intronic	hsa-novelmir-86
chr1	-	17185816	chr1	-	16859321	p1@MIR3675	curation	intergenic	hsa-mir-3675
chr1	+	17222751	chr1	+	16896256	p@chr1:17222746..17222755,+	ENST00000466256.2	intronic	hsa-novelmir-90
chr1	+	17231694	chr1	+	16905199	p@chr1:17231687..17231704,+	ENST00000466256.2	intronic	hsa-novelmir-91
chr1	+	17575593	chr1	+	17249098	p1@PADI3	NM_016233	intronic	hsa-mir-3972
chr1	-	17765032	chr1	-	17438536	p1@RCC2	ENST00000375433.3	intronic	hsa-novelmir-93,hsa-novelmir-92
chr1	+	17866251	chr1	+	17539756	p1@ARHGEF10L	NM_018125	intronic	hsa-novelmir-95,hsa-novelmir-96,hsa-novelmir-97
chr1	-	19229049	chr1	-	18902555	p1@ALDH4A1	ENST00000290597.5	intronic	hsa-mir-1290,hsa-mir-4695
chr1	-	19536754	chr1	-	19210260	p1@UBR4	NM_020765	intronic	hsa-novelmir-100,hsa-novelmir-99
chr1	-	19578018	chr1	-	19251524	p1@KIAA0090	ENST00000375208.3	intronic	hsa-novelmir-101
chr1	+	20208893	chr1	+	19882400	p1@OTUD3	NM_015207	intronic	hsa-novelmir-103,hsa-novelmir-104
chr1	-	20812697	chr1	-	20486204	p1@CAMK2N1	ENST00000375078.3	intronic	hsa-novelmir-106
chr1	+	20959971	chr1	+	20633478	p1@PINK1	NM_032409	intronic	hsa-mir-6084,hsa-novelmir-107
chr1	-	21503390	chr1	-	21176897	p1@EIF4G3	NM_001198801	intronic	hsa-mir-1256
chr1	-	22109642	chr1	-	21783149	p1@USP48	NM_032236	intronic	hsa-novelmir-111
chr1	-	22263800	chr1	-	21937307	p1@HSPG2	ENST00000374695.3	intronic	hsa-novelmir-115,hsa-novelmir-114,hsa-novelmir-113,hsa-novelmir-112
chr1	+	23037332	chr1	+	22710839	p1@EPHB2	ENST00000544305.1	intronic	hsa-mir-4684,hsa-novelmir-118
chr1	+	23345961	chr1	+	23019468	p1@KDM1A	NM_001009999	intronic	hsa-mir-3115
chr1	-	23414894	chr1	-	23088401	p1@ENST00000427154	ENST00000427154.1	intergenic	hsa-mir-4419a
chr1	-	23810672	chr1	-	23484179	p1@ASAP3	ENST00000336689.3	intronic	hsa-novelmir-120
chr1	-	24306817	chr1	-	23980327	p1@SRSF10	ENST00000344989.6	intronic	hsa-novelmir-122
chr1	-	24513747	chr1	-	24187257	p1@IL28RA	ENST00000327535.1	intronic	hsa-novelmir-124
chr1	+	24742292	chr1	+	24415802	p1@NIPAL3	ENST00000003912.3	intronic	hsa-novelmir-125
chr1	+	24829503	chr1	+	24503013	p1@RCAN3	NM_013441	intronic	hsa-novelmir-126
chr1	-	25256767	chr1	-	24930276	p1@RUNX3	NM_004350	intronic	hsa-mir-6731
chr1	-	25291497	chr1	-	24965006	p2@RUNX3	NM_001031680	intronic	hsa-novelmir-129
chr1	-	26232942	chr1	-	25906451	p1@MIR3917	ENST00000426559.2	intronic	hsa-mir-3917
chr1	+	26758816	chr1	+	26432325	p1@DHDDS	ENST00000360009.2	intronic	hsa-novelmir-132
chr1	+	26872347	chr1	+	26545856	p1@RPS6KA1	NM_001006665	intronic	hsa-mir-1976
chr1	+	27022520	chr1	+	26696029	p1@ARID1A	NM_006015	intronic	hsa-novelmir-134
chr1	+	27320183	chr1	+	26993692	p1@TRNP1	NM_001013642	intronic	hsa-novelmir-136,hsa-novelmir-137,hsa-novelmir-138
chr1	-	27339341	chr1	-	27012850	p1@FAM46B	NM_052943	intronic	hsa-novelmir-140
chr1	-	27481616	chr1	-	27155125	p1@SLC9A1	NM_003047	intronic	hsa-novelmir-142,hsa-novelmir-141
chr1	+	27668544	chr1	+	27342053	p1@SYTL1	ENST00000483926.1	intronic	hsa-novelmir-144
chr1	-	27816669	chr1	-	27490158	p1@WASF2	ENST00000430629.2	intronic	hsa-novelmir-146,hsa-novelmir-145
chr1	+	28157325	chr1	+	27830814	p1@PPP1R8	NM_002713	intronic	hsa-novelmir-149
chr1	+	28261540	chr1	+	27935029	p1@SMPDL3B	ENST00000548116.1	intronic	hsa-novelmir-150
chr1	-	28415121	chr1	-	28088610	p1@EYA3	ENST00000436342.2	intronic	hsa-novelmir-154,hsa-novelmir-153,hsa-novelmir-152,hsa-novelmir-151
chr1	+	28586035	chr1	+	28259524	p1@SESN2	ENST00000253063.3	intronic	hsa-novelmir-156
chr1	+	28696252	chr1	+	28369741	p1@PHACTR4	ENST00000463428.1	intronic	hsa-novelmir-157
chr1	+	28832556	chr1	+	28506044	p1@RCC1,p1@SNHG3	ENST00000434290.1	intronic	hsa-novelmir-158
chr1	+	28879597	chr1	+	28553085	p1@TRNAU1AP	ENST00000373830.3	intronic	hsa-novelmir-159
chr1	-	28929960	chr1	-	28603448	p@chr1:28929956..28929962,-	ENST00000471683.1	intronic	hsa-novelmir-160
chr1	+	29213615	chr1	+	28887103	p1@EPB41	NM_203342	intronic	hsa-novelmir-161
chr1	-	29508410	chr1	-	29181898	p1@SRSF4	ENST00000546138.1	intronic	hsa-novelmir-162
chr1	+	29563034	chr1	+	29236522	p1@PTPRU	NM_005704	intronic	hsa-novelmir-163
chr1	-	31230621	chr1	-	30757774	p1@LAPTM5	ENST00000294507.3	intronic	hsa-mir-4420
chr1	-	31846553	chr1	-	31373706	p@chr1:31846547..31846568,-	ENST00000482018.1	intronic	hsa-novelmir-164
chr1	-	32229941	chr1	-	31764340	p1@BAI2	ENST00000398542.1	intronic	hsa-novelmir-165,hsa-mir-4254
chr1	+	32479471	chr1	+	32013870	p1@KHDRBS1	ENST00000484270.2	intronic	hsa-novelmir-168
chr1	+	32538567	chr1	+	32072966	p1@TMEM39B	ENST00000456834.2	intronic	hsa-mir-5585
chr1	+	32573657	chr1	+	32108056	p1@KPNA6	ENST00000471599.1	intronic	hsa-novelmir-169
chr1	-	32707244	chr1	-	32241643	p1@MTMR9LP	ENST00000441044.1	intergenic	hsa-novelmir-171
chr1	-	33168345	chr1	-	32702744	p1@SYNC	NM_001161708	intronic	hsa-novelmir-172
chr1	+	33219600	chr1	+	32753999	p1@KIAA1522	ENST00000373481.3	intronic	hsa-novelmir-173
chr1	-	33502480	chr1	-	33036879	p1@AK2	ENST00000373449.2	intronic	hsa-novelmir-175
chr1	+	33722146	chr1	+	33256545	p1@ZNF362	ENST00000483388.1	intronic	hsa-novelmir-176
chr1	-	33815500	chr1	-	33349899	p1@PHC2	NM_004427	intronic	hsa-novelmir-177,hsa-mir-3605
chr1	+	33938252	chr1	+	33472651	p1@ZSCAN20	ENST00000373413.2	intronic	hsa-novelmir-178
chr1	-	34630831	chr1	-	34165230	p1@CSMD2	ENST00000373381.4	intronic	hsa-novelmir-182,hsa-novelmir-181,hsa-novelmir-180,hsa-novelmir-179
chr1	+	34632615	chr1	+	34167014	p2@C1orf94	NM_032884	intronic	hsa-novelmir-183
chr1	-	35150910	chr1	-	34685309	p@chr1:35150899..35150929,-	curation	intergenic	hsa-mir-552
chr1	-	36023004	chr1	-	35557403	p1@KIAA0319L	ENST00000325722.3	intronic	hsa-novelmir-185
chr1	+	36046691	chr1	+	35581090	p@chr1:36046689..36046698,+	NM_178548	intronic	hsa-novelmir-186
chr1	-	36235568	chr1	-	35769967	p1@CLSPN	ENST00000251195.5	intronic	hsa-novelmir-187
chr1	+	36396853	chr1	+	35931252	p2@EIF2C3	ENST00000246314.6	intronic	hsa-novelmir-188
chr1	+	36621783	chr1	+	36156182	p1@MAP7D1	ENST00000373150.4	intronic	hsa-novelmir-189
chr1	+	36772708	chr1	+	36307107	p1@SH3D21	NM_024676	intronic	hsa-novelmir-190,hsa-novelmir-192
chr1	-	36851516	chr1	-	36385915	p1@STK40	ENST00000373132.3	intronic	hsa-novelmir-194
chr1	+	37940181	chr1	+	37474580	p1@ZC3H12A	ENST00000373087.6	intronic	hsa-mir-6732,hsa-novelmir-199
chr1	-	37980355	chr1	-	37514754	p1@MEAF6	ENST00000475828.1	intronic	hsa-mir-5581
chr1	+	38512806	chr1	+	38047134	p1@ENST00000432922	ENST00000432922.1	intergenic	hsa-mir-3659
chr1	+	39492022	chr1	+	39026350	p1@NDUFS5	ENST00000372969.3	intronic	hsa-novelmir-204
chr1	+	39571071	chr1	+	39105399	p1@MACF1	ENST00000524432.1	intronic	hsa-novelmir-205
chr1	-	40042462	chr1	-	39576790	p1@PABPC4	ENST00000372856.3	intronic	hsa-novelmir-206
chr1	+	41157376	chr1	+	40691704	p1@NFYC	ENST00000447388.3	intronic	hsa-mir-30e,hsa-mir-30c-1
chr1	-	41707810	chr1	-	41242138	p1@SCMH1	NM_001172220	intronic	hsa-novelmir-209
chr1	-	42384592	chr1	-	41918921	p2@HIVEP3	NM_001127714	intronic	hsa-novelmir-211
chr1	+	43148089	chr1	+	42682418	p1@YBX1	ENST00000321358.7	intronic	hsa-novelmir-214
chr1	-	43637950	chr1	-	43172279	p1@EBNA1BP2	ENST00000483082.1	intronic	hsa-mir-6733
chr1	-	43833682	chr1	-	43368011	p1@ELOVL1	ENST00000413844.2	intronic	hsa-mir-6734
chr1	+	43855600	chr1	+	43389929	p1@ENST00000357658	ENST00000562955.1	intronic	hsa-mir-6735,hsa-novelmir-216
chr1	+	43996575	chr1	+	43530904	p1@PTPRF	ENST00000438120.1	intronic	hsa-novelmir-217,hsa-novelmir-218
chr1	+	44173207	chr1	+	43707536	p1@ST3GAL3	NM_174963	intronic	hsa-mir-6079,hsa-novelmir-221
chr1	+	44440632	chr1	+	43974960	p1@ATP6V0B	ENST00000471859.2	intronic	hsa-novelmir-222
chr1	-	44497134	chr1	-	44031462	p1@SLC6A9	NM_001024845	intronic	hsa-novelmir-223
chr1	+	44870927	chr1	+	44405255	p2@RNF220	NM_018150	intronic	hsa-mir-5584
chr1	+	45097640	chr1	+	44631968	p1@RNF220	ENST00000474064.1	intronic	hsa-novelmir-226
chr1	+	45205534	chr1	+	44739862	p1@KIF2C	ENST00000372218.4	intronic	hsa-novelmir-227
chr1	-	45452267	chr1	-	44986595	p1@EIF2B3	ENST00000372183.3	intronic	hsa-novelmir-228
chr1	+	45805842	chr1	+	45340170	p1@TOE1	ENST00000471337.1	intronic	hsa-novelmir-232
chr1	-	46642160	chr1	-	46176488	p4@PIK3R3	ENST00000540385.1	intronic	hsa-novelmir-235
chr1	+	46859989	chr1	+	46394317	p1@FAAH	NM_001441	intronic	hsa-novelmir-238
chr1	-	47082505	chr1	-	46616833	p2@MKNK1	ENST00000545730.1	intronic	hsa-novelmir-239
chr1	+	47139710	chr1	+	46674038	p1@LOC100130197	NR_038828	intergenic	hsa-novelmir-241
chr1	+	47644968	chr1	+	47179296	p2@ENST00000429328	NR_047498	intergenic	hsa-novelmir-243
chr1	-	47779819	chr1	-	47314147	p1@STIL,p1@TAL1	NM_003035	intronic	hsa-novelmir-244
chr1	-	48937849	chr1	-	48472177	p1@SPATA6	ENST00000371847.3	intronic	hsa-novelmir-246
chr1	+	51435926	chr1	+	50970254	p1@CDKN2C	curation	intronic	hsa-mir-6500,hsa-mir-4421
chr1	+	52082764	chr1	+	51617092	p1@OSBPL9	ENST00000435274.2	intronic	hsa-novelmir-250
chr1	-	52344399	chr1	-	51878727	p1@NRD1	ENST00000544028.1	intronic	hsa-mir-761
chr1	+	53192125	chr1	+	52726453	p1@ZYG11B	NM_024646	intronic	hsa-novelmir-251
chr1	+	53392958	chr1	+	52927286	p2@SCP2	ENST00000528311.1	intronic	hsa-mir-1273f,hsa-mir-5095,hsa-mir-1273g,hsa-novelmir-252
chr1	-	53793742	chr1	-	53328070	p1@LRP8	ENST00000480045.1	intronic	hsa-novelmir-253
chr1	-	54303969	chr1	-	53838296	p1@TMEM48	NM_001168551	intronic	hsa-novelmir-254
chr1	+	54412026	chr1	+	53946353	p1@LRRC42	ENST00000319223.4	intronic	hsa-novelmir-255
chr1	+	54519310	chr1	+	54053637	p1@TCEANC2	NM_153035	intronic	hsa-mir-4781
chr1	+	55505221	chr1	+	55039548	p1@PCSK9	ENST00000302118.5	intronic	hsa-novelmir-258
chr1	-	55681035	chr1	-	55215362	p1@USP24	NM_015306	intronic	hsa-novelmir-259
chr1	+	55681096	chr1	+	55215423	p1@LOC100507634	curation	intergenic	hsa-mir-4422
chr1	-	57045080	chr1	-	56579407	p1@PPAP2B	ENST00000371250.3	intronic	hsa-novelmir-262
chr1	-	60392443	chr1	-	59926771	p1@CYP2J2	ENST00000466095.1	intronic	hsa-novelmir-268
chr1	+	61548293	chr1	+	61082621	p1@NFIA	ENST00000371187.3	intronic	hsa-novelmir-269
chr1	+	62208152	chr1	+	61742480	p1@INADL	NM_176877	intronic	hsa-mir-3116-1,hsa-novelmir-270,hsa-novelmir-271
chr1	-	63988896	chr1	-	63523225	p1@ITGB3BP	ENST00000271002.10	intronic	hsa-novelmir-274
chr1	+	64937859	chr1	+	64472176	p@chr1:64937853..64937870,+	NM_020925	intronic	hsa-mir-4794,hsa-novelmir-276
chr1	-	65432232	chr1	-	64966549	p1@JAK1	NM_002227	intronic	hsa-novelmir-277
chr1	-	65533429	chr1	-	65067746	p1@ENST00000448344	curation	intergenic	hsa-mir-3671,hsa-mir-101-1
chr1	+	65886384	chr1	+	65420701	p1@LEPROT,p1@LEPR	NM_001198681	intronic	hsa-novelmir-278
chr1	+	66999836	chr1	+	66534153	p1@SGIP1	ENST00000468286.1	intronic	hsa-mir-3117
chr1	+	67390673	chr1	+	66924990	p1@MIER1	ENST00000401041.1	intronic	hsa-novelmir-279
chr1	+	68297986	chr1	+	67832303	p1@LOC100289178	ENST00000420587.1	intergenic	hsa-novelmir-280
chr1	-	68698206	chr1	-	68232523	p1@WLS	ENST00000370973.2	intronic	hsa-novelmir-281,hsa-mir-1262
chr1	-	70820405	chr1	-	70354722	p1@ANKRD13C	ENST00000370944.4	intronic	hsa-novelmir-283
chr1	-	71546718	chr1	-	71081035	p1@ZRANB2	ENST00000254821.6	intronic	hsa-mir-186
chr1	+	71547032	chr1	+	71081349	p1@ENST00000413421,p1@uc001dfu.1	ENST00000599146.1	intergenic	hsa-novelmir-284
chr1	+	76251941	chr1	+	75786256	p1@RABGGTB	NM_004582	intronic	hsa-novelmir-286
chr1	+	76540431	chr1	+	76074746	p1@ST6GALNAC3	ENST00000328299.3	intronic	hsa-novelmir-287,hsa-novelmir-288
chr1	+	77333165	chr1	+	76867480	p1@ST6GALNAC5	ENST00000318803.6	intronic	hsa-mir-7156
chr1	-	78444748	chr1	-	77979064	p1@FUBP1	ENST00000436586.2	intronic	hsa-novelmir-289
chr1	+	78444951	chr1	+	77979267	p3@DNAJB4	ENST00000484662.1	intronic	hsa-novelmir-290
chr1	+	81771851	chr1	+	81306166	p1@LPHN2	ENST00000370721.1	intronic	hsa-novelmir-293
chr1	+	82267127	chr1	+	81801442	p@chr1:82267117..82267157,+	NM_012302	intronic	hsa-novelmir-294
chr1	+	85528010	chr1	+	85062327	p2@WDR63	ENST00000528899.1	intronic	hsa-novelmir-296
chr1	+	85528027	chr1	+	85062344	p1@WDR63	curation	intronic	hsa-mir-4423
chr1	+	85741989	chr1	+	85276306	p1@LOC646626	ENST00000427819.1	intergenic	hsa-novelmir-299
chr1	-	85930842	chr1	-	85465159	p1@DDAH1	ENST00000539042.1	intronic	hsa-novelmir-300
chr1	-	86622455	chr1	-	86156772	p1@COL24A1	ENST00000370571.2	intronic	hsa-novelmir-302
chr1	-	86861966	chr1	-	86396283	p1@ODF2L	ENST00000294678.2	intronic	hsa-mir-7856
chr1	+	87250563	chr1	+	86784880	p1@ENST00000447415	ENST00000447415.1	intergenic	hsa-novelmir-306
chr1	+	87380428	chr1	+	86914745	p1@HS2ST1	ENST00000370550.5	intronic	hsa-novelmir-307
chr1	+	87595527	chr1	+	87129844	p2@HS2ST1	ENST00000471417.1	intergenic	hsa-novelmir-308
chr1	+	90286591	chr1	+	89821032	p1@LRRC8D	ENST00000337338.5	intronic	hsa-novelmir-310
chr1	-	92351678	chr1	-	91886121	p1@TGFBR3	ENST00000417833.2	intronic	hsa-novelmir-312,hsa-novelmir-311
chr1	-	93250665	chr1	-	92785108	p1@EVI5	ENST00000543509.1	intronic	hsa-novelmir-313
chr1	+	93297597	chr1	+	92832040	p1@RPL5	NM_000969	intronic	hsa-novelmir-314
chr1	-	93427019	chr1	-	92961462	p1@FAM69A	ENST00000370310.4	intronic	hsa-novelmir-316
chr1	+	93544840	chr1	+	93079283	p1@MTF2	ENST00000471953.1	intronic	hsa-novelmir-317
chr1	+	94311782	chr1	+	93846226	p@chr1:94311760..94311797,+	curation	intergenic	hsa-mir-760
chr1	+	94312318	chr1	+	93846762	p1@MIR760	ENST00000565336.1	intergenic	hsa-novelmir-318
chr1	+	94883948	chr1	+	94418392	p1@ABCD3	NM_002858	intronic	hsa-novelmir-319
chr1	-	95285788	chr1	-	94820232	p1@ENST00000414374,p1@ENST00000418366,p1@ENST00000421997	ENST00000421997.1	intergenic	hsa-mir-378g
chr1	+	95582940	chr1	+	95117384	p1@TMEM56	NM_152487	intronic	hsa-novelmir-322
chr1	-	98515427	chr1	-	98049871	p1@MIR137HG	NR_046105.1	intergenic	hsa-mir-137,hsa-mir-2682
chr1	+	100731794	chr1	+	100266238	p1@RTCD1	ENST00000260563.4	intronic	hsa-mir-553,hsa-novelmir-329
chr1	+	109756540	chr1	+	109213918	p1@SARS	ENST00000234677.2	intronic	hsa-novelmir-334
chr1	+	109792163	chr1	+	109249541	p1@CELSR2	NM_001408	intronic	hsa-novelmir-336
chr1	+	110036716	chr1	+	109494094	p1@CYB561D1	ENST00000310611.4	intronic	hsa-novelmir-337
chr1	+	110140099	chr1	+	109597477	p@chr1:110140096..110140101,+	curation	intergenic	hsa-mir-197
chr1	+	110162459	chr1	+	109619837	p1@AMPD2	ENST00000342115.4	intronic	hsa-novelmir-338
chr1	+	110752936	chr1	+	110210314	p1@KCNC4	NM_004978	intronic	hsa-novelmir-340
chr1	+	111682121	chr1	+	111139499	p2@CEPT1	NM_001007794	intronic	hsa-novelmir-342
chr1	-	111743268	chr1	-	111200646	p1@DENND2D	NM_024901	intronic	hsa-novelmir-343
chr1	-	111747160	chr1	-	111204538	p2@DENND2D	ENST00000473822.1	intronic	hsa-novelmir-344
chr1	+	111992116	chr1	+	111449494	p1@ATP5F1	ENST00000468818.1	intronic	hsa-novelmir-345
chr1	-	112532269	chr1	-	111989647	p1@KCND3	NM_172198	intronic	hsa-novelmir-346
chr1	-	112903229	chr1	-	112360607	p1@ENST00000427290	ENST00000427290.1	intergenic	hsa-novelmir-348
chr1	+	113217316	chr1	+	112674694	p1@MOV10	ENST00000369644.1	intronic	hsa-novelmir-349,hsa-novelmir-350
chr1	-	113257930	chr1	-	112715308	p1@PPM1J	ENST00000464951.1	intronic	hsa-novelmir-352
chr1	+	114355234	chr1	+	113812612	p1@ENST00000418238	ENST00000418238.1	intergenic	hsa-novelmir-356
chr1	-	115053824	chr1	-	114511203	p1@TRIM33	NM_033020	intronic	hsa-novelmir-358
chr1	-	117039515	chr1	-	116496893	p@chr1:117039506..117039518,-	XR_110492	intergenic	hsa-novelmir-363
chr1	-	117113616	chr1	-	116570994	p1@CD58	ENST00000464088.1	intronic	hsa-mir-548ac
chr1	-	117602086	chr1	-	117059464	p1@ENST00000445523	ENST00000445523.1	intergenic	hsa-novelmir-364
chr1	+	117602949	chr1	+	117060327	p1@TTF2	NM_003594	intronic	hsa-mir-942
chr1	-	117753549	chr1	-	117210927	p1@VTCN1	ENST00000328189.3	intronic	hsa-novelmir-365
chr1	-	118148392	chr1	-	117605770	p1@ENST00000425010	ENST00000425010.1	intergenic	hsa-novelmir-366
chr1	+	120254560	chr1	+	119711937	p1@PHGDH	ENST00000369409.4	intronic	hsa-novelmir-369
chr1	-	145039956	chr1	+	148844428	p1@PDE4DIP	NM_001198832	intronic	hsa-novelmir-371
chr1	+	145575287	chr1	-	145859782	p1@PIAS3	curation	intronic	hsa-mir-6736
chr1	-	146556303	chr1	-	147084756	p@chr1:146556295..146556310,-	ENST00000444082.1	intergenic	hsa-novelmir-374
chr1	-	146644049	chr1	-	147172470	p1@PRKAB2	ENST00000254101.3	intronic	hsa-novelmir-375
chr1	+	146714336	chr1	+	147242686	p1@CHD1L	ENST00000488864.1	intronic	hsa-novelmir-376
chr1	-	149889396	chr1	-	149917844	p1@SV2A	NM_014849	intronic	hsa-novelmir-386
chr1	-	150241414	chr1	-	150269014	p1@APH1A	ENST00000461320.1	intronic	hsa-novelmir-392
chr1	+	150294002	chr1	+	150321553	p1@PRPF3	ENST00000414970.2	intronic	hsa-novelmir-393
chr1	+	150459911	chr1	+	150487435	p1@TARS2	ENST00000369051.3	intronic	hsa-mir-6878
chr1	+	150521884	chr1	+	150549408	p1@ADAMTSL4	ENST00000369041.5	intronic	hsa-mir-4257,hsa-novelmir-396
chr1	-	150526162	chr1	-	150553686	p@chr1:150526156..150526177,-	ENST00000442435.2	intergenic	hsa-novelmir-395
chr1	-	150669630	chr1	-	150697154	p1@GOLPH3L	NM_018178	intronic	hsa-novelmir-398
chr1	+	150898848	chr1	+	150926372	p1@SETDB1	ENST00000534805.1	intronic	hsa-novelmir-399
chr1	+	150947422	chr1	+	150974946	p@chr1:150947416..150947451,+	ENST00000412838.1	intergenic	hsa-novelmir-400
chr1	+	150980937	chr1	+	151008461	p1@PRUNE	ENST00000475722.1	intronic	hsa-novelmir-402
chr1	+	151043077	chr1	+	151070601	p3@GABPB2	NM_144618	intronic	hsa-novelmir-404
chr1	+	151254775	chr1	+	151282299	p1@ZNF687	ENST00000449313.1	intronic	hsa-novelmir-405
chr1	+	151319484	chr1	+	151347008	p1@ENST00000455503	ENST00000455503.1	intergenic	hsa-novelmir-406
chr1	+	151512785	chr1	+	151540309	p1@TUFT1	ENST00000538902.1	intronic	hsa-mir-554,hsa-novelmir-408
chr1	-	151966335	chr1	-	151993859	p1@S100A10	ENST00000478348.1	intronic	hsa-novelmir-409
chr1	-	153588800	chr1	-	153616324	p1@S100A14	NM_020672	intronic	hsa-novelmir-411
chr1	+	153700526	chr1	+	153728050	p1@INTS3	ENST00000318967.2	intronic	hsa-novelmir-412
chr1	+	153747883	chr1	+	153775407	p1@SLC27A3	ENST00000468403.1	intronic	hsa-novelmir-413
chr1	-	153919194	chr1	-	153946718	p2@DENND4B	ENST00000361217.4	intronic	hsa-novelmir-415,hsa-novelmir-414
chr1	-	153936013	chr1	-	153963537	p1@SLC39A1	ENST00000537590.1	intronic	hsa-mir-6737
chr1	+	153940378	chr1	+	153967902	p1@CREB3L4	ENST00000368607.3	intronic	hsa-novelmir-416
chr1	-	153950150	chr1	-	153977674	p1@JTB	ENST00000368589.1	intronic	hsa-novelmir-417
chr1	-	154127527	chr1	-	154155051	p1@NUP210L	NM_001159484	intronic	hsa-mir-5698
chr1	-	154167176	chr1	-	154194700	p15@TPM3	ENST00000515609.1	intronic	hsa-mir-190b
chr1	+	154193434	chr1	+	154220958	p1@UBAP2L	ENST00000271877.7	intronic	hsa-novelmir-418,hsa-novelmir-419
chr1	-	154936121	chr1	-	154963645	p2@PYGO2	ENST00000483463.1	intronic	hsa-novelmir-423
chr1	-	154943223	chr1	-	154970747	p1@SHC1	NM_183001	intronic	hsa-novelmir-424
chr1	+	154947157	chr1	+	154974681	p1@CKS1B	ENST00000368436.1	intronic	hsa-mir-4258
chr1	+	154975278	chr1	+	155002802	p1@ZBTB7B	ENST00000417934.2	intronic	hsa-novelmir-427
chr1	+	155164792	chr1	+	155195001	p1@MIR92B	DB477162	intergenic	hsa-mir-92b
chr1	-	155532593	chr1	-	155562802	p1@ASH1L	ENST00000368346.3	intronic	hsa-mir-555
chr1	-	155948333	chr1	-	155978542	p1@ARHGEF2	NM_001162384	intronic	hsa-mir-6738
chr1	-	156052256	chr1	-	156082465	p1@MEX3A	NM_001093725	intronic	hsa-novelmir-433
chr1	+	156052674	chr1	+	156082883	p@chr1:156052656..156052690,+	ENST00000470835.1	intronic	hsa-novelmir-434
chr1	+	156124339	chr1	+	156154548	p1@SEMA4A	ENST00000368282.1	intronic	hsa-novelmir-436
chr1	+	156163908	chr1	+	156194117	p1@SLC25A44	ENST00000359511.4	intronic	hsa-novelmir-437
chr1	-	156399218	chr1	-	156429426	p1@C1orf61	ENST00000400991.2	intronic	hsa-mir-9-1
chr1	-	156542348	chr1	-	156572556	p1@IQGAP3	ENST00000361170.2	intronic	hsa-novelmir-439,hsa-novelmir-438
chr1	-	156675375	chr1	-	156705583	p1@CRABP2	ENST00000368222.3	intronic	hsa-novelmir-442
chr1	+	156863512	chr1	+	156893720	p1@PEAR1	ENST00000338302.3	intronic	hsa-novelmir-443
chr1	-	157015534	chr1	-	157045742	p1@ARHGEF11	NM_014784	intronic	hsa-mir-765
chr1	+	157042973	chr1	+	157073181	p1@KRT8P45	ENST00000414328.2	intergenic	hsa-novelmir-444
chr1	-	159869949	chr1	-	159900159	p3@CCDC19	ENST00000368099.4	intronic	hsa-mir-4259
chr1	+	160040218	chr1	+	160070428	p@chr1:160040215..160040222,+	ENST00000435580.1	intergenic	hsa-novelmir-447
chr1	-	160313037	chr1	-	160343247	p1@COPA	ENST00000368069.3	intronic	hsa-novelmir-448
chr1	-	160493042	chr1	-	160523252	p1@SLAMF6	ENST00000368057.3	intronic	hsa-novelmir-449
chr1	-	161168842	chr1	-	161199052	p1@ADAMTS4	NM_005099	intronic	hsa-novelmir-451
chr1	+	161195850	chr1	+	161226060	p1@TOMM40L	ENST00000474486.1	intronic	hsa-mir-5187
chr1	+	161337503	chr1	+	161367713	p1@ENST00000437833	ENST00000437833.2	intergenic	hsa-novelmir-452
chr1	+	161736110	chr1	+	161766320	p1@ATF6	ENST00000367942.3	intronic	hsa-novelmir-455
chr1	+	162039530	chr1	+	162069740	p1@NOS1AP	ENST00000530878.1	intronic	hsa-mir-556,hsa-mir-4654,hsa-novelmir-456
chr1	+	164528421	chr1	+	164559184	p1@PBX1	NM_002585	intronic	hsa-novelmir-457,hsa-novelmir-459,hsa-novelmir-460,hsa-novelmir-461
chr1	+	165796853	chr1	+	165827616	p1@UCK2	NM_012474	intronic	hsa-mir-3658,hsa-novelmir-462
chr1	-	166136225	chr1	-	166166988	p1@FAM78B	ENST00000338353.3	intronic	hsa-novelmir-463,hsa-mir-921
chr1	+	167190128	chr1	+	167220891	p1@POU2F1	ENST00000442313.1	intronic	hsa-novelmir-465,hsa-novelmir-466
chr1	-	167487766	chr1	-	167518529	p1@CD247	ENST00000483825.1	intronic	hsa-novelmir-468,hsa-novelmir-467
chr1	+	167905934	chr1	+	167936696	p1@DCAF6	ENST00000432587.2	intronic	hsa-mir-1255b-2,hsa-novelmir-469
chr1	-	169337035	chr1	-	169367797	p1@NME7	ENST00000480478.1	intronic	hsa-novelmir-474
chr1	-	169681302	chr1	-	169712161	p5@SELL	NM_000655	intronic	hsa-novelmir-475
chr1	-	169764048	chr1	-	169794907	p1@METTL18	NM_033418	intronic	hsa-novelmir-476
chr1	+	169764186	chr1	+	169795045	p1@C1orf112	ENST00000359326.4	intronic	hsa-novelmir-478
chr1	+	170115111	chr1	+	170145970	p1@METTL11B	ENST00000439373.2	intronic	hsa-mir-3119-2
chr1	+	170632303	chr1	+	170663162	p1@PRRX1	ENST00000367760.3	intronic	hsa-novelmir-480
chr1	+	171060046	chr1	+	171090905	p1@FMO3	ENST00000538429.1	intronic	hsa-mir-1295b
chr1	+	171217659	chr1	+	171248520	p1@FMO1	NM_002021	intronic	hsa-novelmir-481
chr1	+	171454689	chr1	+	171485550	p1@PRRC2C	ENST00000367742.3	intronic	hsa-novelmir-482
chr1	+	171750814	chr1	+	171781674	p1@METTL13	ENST00000362019.3	intronic	hsa-novelmir-483
chr1	+	171810638	chr1	+	171841498	p1@DNM3	ENST00000355305.5	intronic	hsa-mir-3120,hsa-novelmir-484
chr1	-	172113934	chr1	-	172144794	p1@DNM3OS	NR_038397	intergenic	hsa-mir-199a-2,hsa-mir-214
chr1	+	174128658	chr1	+	174159520	p1@RABGAP1L	ENST00000251507.4	intronic	hsa-novelmir-487,hsa-novelmir-488
chr1	-	174129288	chr1	-	174160150	p1@ENST00000419983	ENST00000419983.1	intergenic	hsa-novelmir-486
chr1	+	176432311	chr1	+	176463175	p1@PAPPA2	NM_020318	intronic	hsa-novelmir-489
chr1	-	177133843	chr1	-	177164707	p1@ASTN1	ENST00000361833.2	intronic	hsa-mir-488
chr1	+	178511936	chr1	+	178542801	p1@C1orf220	curation	intergenic	hsa-mir-4424
chr1	+	178694379	chr1	+	178725244	p1@RALGPS2	ENST00000367634.2	intronic	hsa-novelmir-493
chr1	-	178695493	chr1	-	178726358	p1@LOC646976	ENST00000608517.1	intergenic	hsa-novelmir-492
chr1	+	180124004	chr1	+	180154869	p1@QSOX1	ENST00000392029.2	intronic	hsa-novelmir-495
chr1	-	180471712	chr1	-	180502577	p1@ACBD6	NM_032360	intronic	hsa-mir-3121
chr1	+	180601158	chr1	+	180632022	p1@XPR1	ENST00000367589.3	intronic	hsa-novelmir-496
chr1	-	182360925	chr1	-	182391790	p1@GLUL	ENST00000489818.1	intronic	hsa-novelmir-498
chr1	-	182361104	chr1	-	182391969	p4@GLUL	ENST00000339526.4	intronic	hsa-novelmir-499
chr1	+	183155399	chr1	+	183186264	p1@LAMC2	ENST00000264144.4	intronic	hsa-novelmir-500
chr1	+	183605244	chr1	+	183636109	p2@RGL1	ENST00000536277.1	intronic	hsa-novelmir-502
chr1	+	192685274	chr1	+	192716144	p1@MIR4426	ENST00000443181.1	intergenic	hsa-mir-4426
chr1	+	193091164	chr1	+	193122034	p1@CDC73	ENST00000367435.3	intronic	hsa-mir-1278,hsa-novelmir-506
chr1	-	196577561	chr1	-	196608431	p1@KCNT2	ENST00000367433.5	intronic	hsa-mir-4735
chr1	-	198906558	chr1	-	198937429	p1@LOC100131234	NR_040073	intergenic	hsa-novelmir-509,hsa-mir-181a-1,hsa-mir-181b-1
chr1	+	199134868	chr1	+	199165740	p@chr1:199134867..199134870,+	ENST00000452199.1	intergenic	hsa-novelmir-511
chr1	+	200008745	chr1	+	200039617	p2@NR5A2	NM_205860	intronic	hsa-novelmir-512
chr1	-	200379154	chr1	-	200410026	p1@ZNF281	NM_012482	intronic	hsa-novelmir-513
chr1	-	200992803	chr1	-	201023675	p1@KIF21B	NM_001252103	intronic	hsa-novelmir-515
chr1	-	201368452	chr1	-	201399324	p1@LAD1	NM_005558	intronic	hsa-novelmir-517
chr1	-	201438316	chr1	-	201469188	p1@PHLDA3	ENST00000367311.3	intronic	hsa-novelmir-518
chr1	+	201617794	chr1	+	201648666	p2@NAV1	NM_020443	intronic	hsa-mir-5191
chr1	+	201709028	chr1	+	201739900	p1@NAV1	ENST00000367295.1	intronic	hsa-mir-1231
chr1	+	201798331	chr1	+	201829203	p1@IPO9	NM_018085	intronic	hsa-mir-6739
chr1	-	201798656	chr1	-	201829528	p1@ENST00000413035	ENST00000413035.1	intergenic	hsa-novelmir-519
chr1	+	201857807	chr1	+	201888679	p2@SHISA4	ENST00000464117.1	intronic	hsa-novelmir-520
chr1	+	201924634	chr1	+	201955506	p1@TIMM17A	ENST00000478378.1	intronic	hsa-novelmir-521
chr1	+	201951776	chr1	+	201982648	p1@RNPEP	ENST00000367286.3	intronic	hsa-mir-6740
chr1	-	202777549	chr1	-	202808421	p1@KDM5B	NM_006618	intronic	hsa-novelmir-524
chr1	+	203764751	chr1	+	203795623	p1@ZC3H11A	NM_014827	intronic	hsa-novelmir-526
chr1	+	204042243	chr1	+	204073115	p1@SOX13	ENST00000367203.4	intronic	hsa-novelmir-528
chr1	-	204380945	chr1	-	204411817	p1@PPP1R15B	NM_032833	intronic	hsa-novelmir-529
chr1	-	204640769	chr1	-	204671641	p@chr1:204640767..204640771,-	NM_006338	intronic	hsa-novelmir-530
chr1	+	204797803	chr1	+	204828675	p1@NFASC	NM_001005388	intronic	hsa-novelmir-531
chr1	-	205419094	chr1	-	205449966	p1@LEMD1	ENST00000367154.1	intronic	hsa-novelmir-534,hsa-novelmir-533,hsa-mir-135b
chr1	-	205719310	chr1	-	205750182	p1@NUCKS1	NM_022731	intronic	hsa-novelmir-535
chr1	+	206643819	chr1	+	206470476	p1@IKBKE	ENST00000537984.1	intronic	hsa-mir-6769b,hsa-novelmir-538,hsa-novelmir-539
chr1	-	206785817	chr1	-	206612464	p1@EIF2D	ENST00000367114.3	intronic	hsa-novelmir-540
chr1	+	206808881	chr1	+	206635536	p1@DYRK3	ENST00000489878.1	intronic	hsa-novelmir-541
chr1	+	206858250	chr1	+	206684905	p1@MAPKAPK2	ENST00000294981.4	intronic	hsa-novelmir-542,hsa-novelmir-543,hsa-novelmir-544
chr1	+	207495023	chr1	+	207321678	p1@CD55	ENST00000367067.4	intronic	hsa-novelmir-545
chr1	+	207925457	chr1	+	207752112	p1@CD46	ENST00000360212.2	intronic	hsa-novelmir-546
chr1	-	208042511	chr1	-	207869166	p1@C1orf132	ENST00000608023.1	intergenic	hsa-novelmir-548,hsa-mir-29b-2,hsa-mir-29c
chr1	-	208084460	chr1	-	207911115	p1@CD34	NM_001025109	intronic	hsa-novelmir-549
chr1	-	208417649	chr1	-	208244304	p1@PLXNA2	NM_025179	intronic	hsa-novelmir-550
chr1	+	209602165	chr1	+	209428820	p1@MIR205HG	ENST00000429156.1	intergenic	hsa-mir-205,hsa-novelmir-551,hsa-novelmir-552
chr1	-	209825770	chr1	-	209652425	p1@LAMB3	ENST00000356082.4	intronic	hsa-mir-4260
chr1	+	209929453	chr1	+	209756108	p1@TRAF3IP3	ENST00000478359.1	intronic	hsa-novelmir-554
chr1	+	210502277	chr1	+	210328933	p1@HHAT	ENST00000545781.1	intronic	hsa-novelmir-555,hsa-novelmir-556
chr1	+	212209135	chr1	+	212035793	p1@DTL	ENST00000542077.1	intronic	hsa-mir-3122
chr1	+	212458752	chr1	+	212285410	p1@PPP2R5A	NM_006243	intronic	hsa-novelmir-557
chr1	+	213123936	chr1	+	212950594	p1@VASH2	ENST00000366968.4	intronic	hsa-novelmir-560,hsa-novelmir-561
chr1	-	214161057	chr1	-	213987714	p@chr1:214161038..214161063,-	ENST00000598091.1	intergenic	hsa-novelmir-562
chr1	-	214724945	chr1	-	214551602	p1@PTPN14	NM_005401	intronic	hsa-novelmir-563
chr1	+	215740718	chr1	+	215567375	p1@KCTD3	NM_016121	intronic	hsa-novelmir-565
chr1	-	217262941	chr1	-	217089599	p3@ESRRG	ENST00000359162.2	intronic	hsa-novelmir-566
chr1	+	220267474	chr1	+	220094132	p1@IARS2	NM_018060	intronic	hsa-novelmir-569
chr1	-	220292455	chr1	-	220119113	p@chr1:220292448..220292466,-	curation	intergenic	hsa-mir-194-1,hsa-mir-215
chr1	-	220445772	chr1	-	220272430	p1@RAB3GAP2	ENST00000478976.1	intronic	hsa-mir-664a
chr1	-	221915431	chr1	-	221742089	p1@DUSP10	ENST00000477026.1	intronic	hsa-novelmir-572
chr1	+	223900241	chr1	+	223712539	p1@CAPN2	NM_001748	intronic	hsa-novelmir-578
chr1	-	224517842	chr1	-	224330140	p1@NVL	ENST00000482491.1	intronic	hsa-mir-320b-2
chr1	-	224622496	chr1	-	224434794	p1@WDR26	NM_001115113	intronic	hsa-mir-4742
chr1	-	226111950	chr1	-	225924250	p1@LEFTY1,p1@PYCR2	ENST00000343818.6	intronic	hsa-mir-6741
chr1	+	226249532	chr1	+	226061831	p3@H3F3A,p3@H3F3B	ENST00000366816.1	intronic	hsa-novelmir-587
chr1	-	226926979	chr1	-	226739278	p1@ITPKB	NM_002221	intronic	hsa-novelmir-589
chr1	-	228135633	chr1	-	227947932	p1@WNT9A	ENST00000272164.5	intronic	hsa-mir-5008
chr1	+	228270423	chr1	+	228082722	p1@ARF1	ENST00000477821.1	intronic	hsa-mir-3620,hsa-novelmir-592
chr1	-	228291026	chr1	-	228103325	p1@C1orf35	NM_024319	intronic	hsa-novelmir-593
chr1	+	228337631	chr1	+	228149930	p1@GJC2	ENST00000366714.2	intronic	hsa-novelmir-594
chr1	-	228594536	chr1	-	228406835	p1@TRIM11	ENST00000284551.6	intronic	hsa-mir-6742
chr1	+	228645804	chr1	+	228458103	p1@HIST3H2BB	curation	intronic	hsa-mir-4666a
chr1	+	230202985	chr1	+	230067238	p1@GALNT2	NM_004481	intronic	hsa-novelmir-598
chr1	-	230562078	chr1	-	230426332	p@chr1:230562043..230562116,-	NM_001258311	intronic	hsa-novelmir-599
chr1	-	231175976	chr1	-	231040230	p1@FAM89A	ENST00000366654.4	intronic	hsa-mir-1182
chr1	+	231376958	chr1	+	231241212	p1@GNPAT	ENST00000366646.3	intronic	hsa-novelmir-600
chr1	-	231558033	chr1	-	231422287	p1@EGLN1	NM_022051	intronic	hsa-novelmir-601
chr1	+	231664421	chr1	+	231528675	p1@TSNAX	NR_028400	intergenic	hsa-novelmir-602
chr1	-	232697325	chr1	-	232561579	p9@SIPA1L2	ENST00000366630.1	intronic	hsa-novelmir-604
chr1	-	233425239	chr1	-	233289493	p1@RPS7P3	NM_014801	intronic	hsa-novelmir-605
chr1	+	233749880	chr1	+	233614134	p1@KCNK1	NM_002245	intronic	hsa-mir-4427
chr1	+	234349965	chr1	+	234214219	p1@SLC35F3	ENST00000366617.3	intronic	hsa-mir-4671
chr1	-	234614924	chr1	-	234479178	p1@TARBP1	NM_005646	intronic	hsa-novelmir-607
chr1	-	235324556	chr1	-	235161241	p1@RBM34	ENST00000474086.1	intronic	hsa-novelmir-611,hsa-novelmir-610
chr1	-	235491483	chr1	-	235328168	p1@ARID4B	ENST00000491632.1	intronic	hsa-novelmir-612,hsa-mir-4753
chr1	-	236030203	chr1	-	235866903	p1@LYST	NM_000081	intronic	hsa-mir-1537
chr1	-	236228390	chr1	-	236065090	p1@NID1	ENST00000366595.3	intronic	hsa-novelmir-614
chr1	-	236767788	chr1	-	236604488	p1@HEATR1	ENST00000366582.3	intronic	hsa-novelmir-617
chr1	+	237205484	chr1	+	237042184	p1@RYR2	ENST00000366574.2	intronic	hsa-mir-4428
chr1	-	242687996	chr1	-	242524694	p1@PLD5	NM_152666	intronic	hsa-novelmir-621,hsa-novelmir-620
chr1	+	243419358	chr1	+	243256056	p1@SDCCAG8	ENST00000366541.3	intronic	hsa-mir-4677
chr1	+	245318287	chr1	+	245154985	p1@KIF26B	NM_018012	intronic	hsa-novelmir-625
chr1	-	246670581	chr1	-	246507279	p1@SMYD3	ENST00000490107.1	intronic	hsa-novelmir-627,hsa-novelmir-626
chr1	-	247242086	chr1	-	247078784	p1@ZNF670,p1@ZNF695	ENST00000474541.1	intronic	hsa-novelmir-629
chr1	-	247365315	chr1	-	247202013	p1@MIR3916	ENST00000421406.1	intergenic	hsa-novelmir-630
chr1	-	247374150	chr1	-	247210848	p@chr1:247374106..247374171,-	ENST00000606173.1	intergenic	hsa-mir-3916
chr2	-	3381589	chr2	-	3377818	p1@TSSC1	ENST00000444776.1	intronic	hsa-novelmir-635,hsa-novelmir-634,hsa-novelmir-633
chr2	+	3622871	chr2	+	3575281	p1@RPS7	NM_001011	intronic	hsa-novelmir-636
chr2	+	6072923	chr2	+	5932791	p1@ENST00000431188	ENST00000431188.1	intergenic	hsa-mir-7158
chr2	-	7005795	chr2	-	6865664	p1@CMPK2	ENST00000256722.5	intronic	hsa-novelmir-637
chr2	+	10443030	chr2	+	10302904	p1@HPCAL1	NM_002149	intronic	hsa-novelmir-645
chr2	-	10952880	chr2	-	10812754	p1@PDIA6	ENST00000540494.1	intronic	hsa-novelmir-648,hsa-novelmir-647
chr2	+	11682815	chr2	+	11542689	p4@GREB1	NM_014668	intronic	hsa-novelmir-652
chr2	+	11886758	chr2	+	11746632	p1@LPIN1	NM_145693	intronic	hsa-mir-548s,hsa-novelmir-653,hsa-novelmir-654
chr2	+	12163605	chr2	+	12023479	p@chr2:12163592..12163610,+	ENST00000412294.1	intergenic	hsa-mir-3681
chr2	+	12857068	chr2	+	12716942	p1@TRIB2	ENST00000381465.2	intronic	hsa-mir-3125,hsa-novelmir-656
chr2	-	15701458	chr2	-	15561334	p1@NBAS	ENST00000441750.1	intronic	hsa-novelmir-658
chr2	+	15731992	chr2	+	15591868	p1@DDX1	ENST00000233084.3	intronic	hsa-novelmir-659,hsa-novelmir-660
chr2	-	16081807	chr2	-	15941685	p1@MYCNOS	ENST00000420452.1	intergenic	hsa-novelmir-661
chr2	-	17935072	chr2	-	17753805	p1@SMC6	ENST00000448223.2	intronic	hsa-novelmir-663
chr2	-	20550595	chr2	-	20350834	p1@PUM2	ENST00000420234.1	intronic	hsa-novelmir-668,hsa-novelmir-667
chr2	-	20850832	chr2	-	20651072	p1@HS1BP3	ENST00000446825.1	intronic	hsa-novelmir-670
chr2	-	23275218	chr2	-	23052347	p@chr2:23275216..23275218,-	ENST00000421581.1	intergenic	hsa-novelmir-672
chr2	-	24270261	chr2	-	24047391	p1@C2orf44	ENST00000406895.3	intronic	hsa-novelmir-673
chr2	-	24272476	chr2	-	24049606	p3@C2orf44	ENST00000443232.1	intronic	hsa-novelmir-674
chr2	+	24272613	chr2	+	24049743	p1@FKBP1B	ENST00000496149.1	intronic	hsa-novelmir-675
chr2	-	25143090	chr2	-	24920221	p1@ADCY3	ENST00000260600.5	intronic	hsa-novelmir-677
chr2	-	25194824	chr2	-	24971955	p1@DNAJC27	ENST00000380809.3	intronic	hsa-novelmir-679
chr2	-	25564794	chr2	-	25341925	p1@DNMT3A	NM_022552	intronic	hsa-novelmir-681,hsa-mir-1301
chr2	+	27071000	chr2	+	26848132	p1@DPYSL5	NM_020134	intronic	hsa-novelmir-685
chr2	+	27274536	chr2	+	27051668	p1@AGBL5	ENST00000451003.1	intronic	hsa-novelmir-687
chr2	+	27440237	chr2	+	27217369	p1@CAD	NM_004341	intronic	hsa-novelmir-690
chr2	-	27579631	chr2	-	27356764	p1@GTF3C2	NM_001035521	intronic	hsa-novelmir-691
chr2	+	28113608	chr2	+	27890741	p1@BRE	ENST00000379624.1	intronic	hsa-mir-4263,hsa-novelmir-693
chr2	-	28615182	chr2	-	28392315	p@chr2:28615172..28615194,-	XR_109966	intergenic	hsa-novelmir-694
chr2	-	30144452	chr2	-	29921586	p1@ALK	ENST00000389048.3	intronic	hsa-novelmir-697
chr2	+	30569512	chr2	+	30346646	p1@ENST00000421976,p1@uc002rnf.1	ENST00000421976.2	intergenic	hsa-novelmir-698
chr2	+	30670139	chr2	+	30447273	p2@LCLAT1	ENST00000478015.1	intronic	hsa-novelmir-699
chr2	-	31806005	chr2	-	31580936	p1@SRD5A2	ENST00000233139.1	intergenic	hsa-novelmir-700
chr2	+	32582284	chr2	+	32357216	p1@BIRC6	NM_016252	intronic	hsa-mir-558,hsa-novelmir-702
chr2	+	32853163	chr2	+	32628096	p1@TTC27	ENST00000317907.4	intronic	hsa-mir-4765
chr2	+	33359663	chr2	+	33134596	p1@LTBP1	NM_000627	intronic	hsa-novelmir-703
chr2	+	33701716	chr2	+	33476649	p1@RASGRP3	ENST00000425210.1	intronic	hsa-novelmir-704
chr2	-	33824358	chr2	-	33599291	p1@FAM98A	ENST00000403368.1	intronic	hsa-novelmir-705
chr2	+	36582921	chr2	+	36355778	p1@CRIM1	ENST00000280527.2	intronic	hsa-novelmir-710,hsa-novelmir-711,hsa-novelmir-712,hsa-novelmir-713
chr2	+	37423639	chr2	+	37196496	p1@LOC100505876	ENST00000470216.1	intronic	hsa-novelmir-716
chr2	-	37898785	chr2	-	37671642	p1@CDC42EP3	ENST00000295324.3	intronic	hsa-novelmir-717
chr2	-	38303293	chr2	-	38076151	p1@CYP1B1	ENST00000462864.1	intronic	hsa-novelmir-718
chr2	-	38604414	chr2	-	38377272	p1@ATL2	ENST00000405384.2	intronic	hsa-novelmir-719
chr2	+	40146830	chr2	+	39919690	p1@ENST00000418854	ENST00000418854.1	intergenic	hsa-novelmir-721
chr2	-	40679196	chr2	-	40452056	p1@SLC8A1	ENST00000406785.2	intronic	hsa-novelmir-722
chr2	-	42180946	chr2	-	41953806	p1@LOC400950	NM_001242815	intronic	hsa-novelmir-723
chr2	+	42275161	chr2	+	42048021	p1@PKDCC	NM_138370	intronic	hsa-novelmir-724
chr2	-	42588357	chr2	-	42361217	p1@COX7A2L	NM_004718	intronic	hsa-novelmir-727
chr2	-	42596113	chr2	-	42368973	p4@COX7A2L	ENST00000378669.1	intronic	hsa-novelmir-728
chr2	-	42721117	chr2	-	42493977	p1@KCNG3	ENST00000394973.4	intronic	hsa-novelmir-730,hsa-novelmir-729
chr2	+	42795782	chr2	+	42568642	p1@MTA3	ENST00000454356.1	intronic	hsa-novelmir-731
chr2	-	44223128	chr2	-	43995989	p1@LRPPRC	NM_133259	intronic	hsa-novelmir-739
chr2	+	45878420	chr2	+	45651281	p1@PRKCE	ENST00000306156.3	intronic	hsa-novelmir-742,hsa-novelmir-743,hsa-novelmir-744,hsa-novelmir-745
chr2	+	46524546	chr2	+	46297407	p1@EPAS1	NM_001430	intronic	hsa-novelmir-748
chr2	+	47143278	chr2	+	46916139	p3@TTC7A	ENST00000409245.1	intronic	hsa-novelmir-750
chr2	+	47168368	chr2	+	46941229	p1@TTC7A	NM_020458	intronic	hsa-novelmir-751
chr2	+	47596450	chr2	+	47369311	p1@EPCAM	NM_002354	intronic	hsa-mir-559,hsa-novelmir-752
chr2	+	47630306	chr2	+	47403167	p1@MSH2	ENST00000406134.1	intronic	hsa-novelmir-753
chr2	+	47708962	chr2	+	47481823	p@chr2:47708959..47708963,+	ENST00000461394.1	intronic	hsa-novelmir-754
chr2	-	47918423	chr2	-	47691284	p1@ENST00000393377,p1@ENST00000456046	ENST00000456046.1	intergenic	hsa-novelmir-755
chr2	-	48031673	chr2	-	47804534	p@chr2:48031671..48031675,-	ENST00000405808.1	intronic	hsa-novelmir-756
chr2	+	48541821	chr2	+	48314682	p1@FOXN2	NM_002158	intronic	hsa-novelmir-759,hsa-novelmir-760,hsa-novelmir-761
chr2	+	48667937	chr2	+	48440798	p1@PPP1R21	ENST00000294952.8	intronic	hsa-novelmir-762
chr2	-	51259270	chr2	-	51032132	p1@NRXN1	ENST00000405472.3	intronic	hsa-novelmir-763,hsa-mir-8485
chr2	+	51259435	chr2	+	51032297	p1@ENST00000440698	ENST00000440698.1	intergenic	hsa-novelmir-764
chr2	+	53994941	chr2	+	53767804	p1@CHAC2	NM_001008708	intronic	hsa-novelmir-766
chr2	-	54014079	chr2	-	53786942	p1@ASB3,p1@GPR75-ASB3	ENST00000263634.3	intronic	hsa-novelmir-767
chr2	-	54087099	chr2	-	53859962	p1@GPR75,p3@ASB3,p3@GPR75-ASB3	ENST00000498475.2	intronic	hsa-mir-3682
chr2	+	54683464	chr2	+	54456327	p1@SPTBN1	NM_003128	intronic	hsa-novelmir-768,hsa-novelmir-769
chr2	+	54950799	chr2	+	54723662	p2@EML6	ENST00000491655.1	intronic	hsa-novelmir-771
chr2	+	55015312	chr2	+	54788175	p@chr2:55015300..55015317,+	NM_001039753	intronic	hsa-novelmir-772
chr2	-	55339748	chr2	-	55112612	p25@RTN4	ENST00000427710.1	intronic	hsa-novelmir-774
chr2	-	56150917	chr2	-	55923782	p1@EFEMP1	ENST00000424836.2	intronic	hsa-novelmir-778
chr2	-	56216722	chr2	-	55989587	p1@MIR216A	ENST00000446139.1	intergenic	hsa-mir-216a,hsa-mir-217
chr2	-	56241388	chr2	-	56014253	p@chr2:56241382..56241393,-	ENST00000446139.1	intergenic	hsa-mir-216b
chr2	-	58468460	chr2	-	58241325	p1@FANCL	ENST00000403295.3	intronic	hsa-novelmir-781
chr2	-	60618482	chr2	-	60391347	p1@ENST00000453476	ENST00000453476.1	intergenic	hsa-mir-4432
chr2	-	60780789	chr2	-	60553654	p1@BCL11A	ENST00000359629.5	intronic	hsa-novelmir-783,hsa-novelmir-782
chr2	-	61765381	chr2	-	61538246	p1@XPO1	ENST00000406957.1	intronic	hsa-novelmir-786,hsa-novelmir-785
chr2	+	62423250	chr2	+	62196115	p1@B3GNT2	ENST00000301998.4	intronic	hsa-mir-5192
chr2	+	62932874	chr2	+	62705739	p1@EHBP1	ENST00000431489.1	intronic	hsa-novelmir-789
chr2	+	64068147	chr2	+	63841013	p2@UGP2	ENST00000493222.1	intronic	hsa-novelmir-790
chr2	+	64069030	chr2	+	63841896	p1@UGP2	NM_006759	intronic	hsa-novelmir-791
chr2	-	64568843	chr2	-	64341709	p1@ENST00000424119	ENST00000424119.1	intergenic	hsa-mir-4433b
chr2	+	64751482	chr2	+	64524348	p1@AFTPH	ENST00000238856.4	intronic	hsa-mir-4434
chr2	+	65283580	chr2	+	65056446	p1@CEP68	ENST00000260569.4	intronic	hsa-novelmir-797,hsa-novelmir-798
chr2	+	69002069	chr2	+	68774937	p2@ARHGAP25	NM_001166276	intronic	hsa-novelmir-802
chr2	+	69240311	chr2	+	69013179	p1@ANTXR1	ENST00000303714.4	intronic	hsa-mir-3126,hsa-novelmir-803,hsa-novelmir-804
chr2	-	69614349	chr2	-	69387217	p1@GFPT1	ENST00000361060.5	intronic	hsa-novelmir-806
chr2	-	69664567	chr2	-	69437435	p1@NFU1	ENST00000419370.1	intronic	hsa-novelmir-807
chr2	-	69870786	chr2	-	69643654	p1@AAK1	ENST00000409068.1	intronic	hsa-novelmir-811,hsa-novelmir-810,hsa-novelmir-809,hsa-novelmir-808
chr2	-	69871233	chr2	-	69644101	p21@AAK1	ENST00000461002.1	intronic	hsa-novelmir-812
chr2	+	69890461	chr2	+	69663329	p@chr2:69890460..69890461,+	ENST00000418066.2	intronic	hsa-novelmir-813
chr2	-	70475747	chr2	-	70248615	p1@C2orf42,p1@TIA1	ENST00000470096.1	intronic	hsa-novelmir-814
chr2	+	71127739	chr2	+	70900609	p1@VAX2	NM_012476	intronic	hsa-novelmir-816
chr2	-	71454233	chr2	-	71227103	p1@PAIP2B	NM_020459	intronic	hsa-novelmir-819
chr2	+	71693829	chr2	+	71466699	p1@DYSF	NM_001130982	intronic	hsa-novelmir-820,hsa-novelmir-821,hsa-novelmir-822
chr2	-	72372133	chr2	-	72145004	p@chr2:72372089..72372138,-	NM_019885	intronic	hsa-novelmir-823
chr2	-	73053144	chr2	-	72826015	p1@EXOC6B	ENST00000410112.2	intronic	hsa-novelmir-825
chr2	-	73298838	chr2	-	73071709	p1@SFXN5	ENST00000450185.1	intronic	hsa-novelmir-827
chr2	+	73613154	chr2	+	73386026	p2@ALMS1	NM_015120	intronic	hsa-novelmir-829
chr2	-	74590229	chr2	-	74363102	p10@DCTN1	ENST00000451608.2	intronic	hsa-novelmir-832
chr2	-	74669036	chr2	-	74441909	p1@RTKN	ENST00000272430.5	intronic	hsa-novelmir-833
chr2	-	74692509	chr2	-	74465382	p1@MOGS	ENST00000409065.1	intronic	hsa-novelmir-834
chr2	-	74730441	chr2	-	74503314	p1@LBX2	NM_001009812	intronic	hsa-novelmir-835
chr2	-	74734802	chr2	-	74507675	p1@PCGF1	NM_032673	intronic	hsa-novelmir-836
chr2	+	74757127	chr2	+	74530000	p1@HTRA2	ENST00000352222.3	intronic	hsa-novelmir-837
chr2	-	74781069	chr2	-	74553942	p1@LOXL3	NM_032603	intronic	hsa-novelmir-838
chr2	+	75061254	chr2	+	74834127	p1@HK2	ENST00000290573.2	intronic	hsa-novelmir-839
chr2	+	75185770	chr2	+	74958643	p1@POLE4	curation	intronic	hsa-mir-5000
chr2	-	75426645	chr2	-	75199519	p1@TACR1	NM_001058	intronic	hsa-novelmir-842
chr2	+	84743622	chr2	+	84516498	p1@DNAH6	NM_001370	intronic	hsa-novelmir-846
chr2	-	85108208	chr2	-	84881084	p1@C2orf89	ENST00000409520.2	intronic	hsa-novelmir-848,hsa-novelmir-847
chr2	+	85198284	chr2	+	84971161	p1@KCMF1	NM_020122	intronic	hsa-novelmir-850
chr2	+	85360537	chr2	+	85133414	p1@TCF7L1	ENST00000282111.3	intronic	hsa-novelmir-851,hsa-novelmir-852
chr2	-	85645552	chr2	-	85418429	p7@CAPG	ENST00000409275.1	intronic	hsa-novelmir-853
chr2	+	85645856	chr2	+	85418733	p1@SH2D6	ENST00000469800.1	intronic	hsa-novelmir-854
chr2	-	86332998	chr2	-	86105875	p1@POLR1A	NM_015425	intronic	hsa-novelmir-858,hsa-novelmir-857
chr2	-	86422564	chr2	-	86195441	p1@IMMT	ENST00000474969.1	intronic	hsa-mir-4779
chr2	-	86564806	chr2	-	86337683	p1@REEP1	NM_001164731	intronic	hsa-novelmir-859
chr2	+	86790362	chr2	+	86563239	p@chr2:86790355..86790380,+	ENST00000439077.1	intergenic	hsa-novelmir-860
chr2	+	87755001	chr2	+	87455482	p1@LINC00152	curation	intergenic	hsa-mir-4435-1
chr2	+	95940240	chr2	+	95274492	p1@PROM2	ENST00000463580.1	intronic	hsa-novelmir-865
chr2	+	95963095	chr2	+	95297347	p1@KCNIP3	ENST00000461336.1	intronic	hsa-novelmir-866
chr2	-	96657572	chr2	-	95991824	p1@ENST00000456556,p1@ENST00000528268,p1@uc010yug.1	ENST00000456556.1	intronic	hsa-novelmir-868
chr2	+	96874145	chr2	+	96208407	p1@LOC285033	NR_046322	intergenic	hsa-novelmir-869
chr2	+	97426639	chr2	+	96760902	p1@CNNM4	NM_020184	intronic	hsa-mir-3127
chr2	-	97523753	chr2	-	96858016	p1@ANKRD39	ENST00000443120.1	intronic	hsa-novelmir-872
chr2	-	97535817	chr2	-	96870080	p1@SEMA4C	NM_017789	intronic	hsa-novelmir-873
chr2	+	97778907	chr2	+	97113170	p2@ANKRD36C,p2@ANKRD36	NM_001164315	intronic	hsa-novelmir-875
chr2	-	98206300	chr2	-	97589837	p1@ANKRD36B	ENST00000419390.1	intergenic	hsa-novelmir-876
chr2	+	98280725	chr2	+	97664262	p1@ENST00000450072	ENST00000609622.1	intergenic	hsa-novelmir-878
chr2	-	98612394	chr2	-	97995931	p1@TMEM131	ENST00000425805.2	intronic	hsa-novelmir-879
chr2	-	99757643	chr2	-	99141180	p1@TSGA10	ENST00000542655.1	intronic	hsa-novelmir-880
chr2	+	99758170	chr2	+	99141707	p1@C2orf15,p4@MRPL30	ENST00000424491.1	intronic	hsa-novelmir-881
chr2	-	100938628	chr2	-	100322166	p@chr2:100938607..100938634,-	NM_198461	intronic	hsa-novelmir-883
chr2	-	102091574	chr2	-	101475112	p1@RFX8	NM_001145664	intronic	hsa-novelmir-884
chr2	+	103039620	chr2	+	102423160	p1@IL18RAP	ENST00000409369.1	intronic	hsa-mir-4772
chr2	+	106361369	chr2	+	105744912	p1@NCK2	ENST00000233154.4	intronic	hsa-novelmir-889
chr2	+	109150926	chr2	+	108534470	p1@LIMS1	ENST00000428064.1	intronic	hsa-novelmir-890,hsa-novelmir-891
chr2	+	109403227	chr2	+	108786771	p1@CCDC138	ENST00000470608.1	intronic	hsa-novelmir-892
chr2	-	109605676	chr2	-	108989220	p1@EDAR	ENST00000409271.1	intronic	hsa-novelmir-893
chr2	+	109745663	chr2	+	109129207	p1@SH3RF3	ENST00000418513.1	intronic	hsa-novelmir-894
chr2	-	110873396	chr2	-	110115819	p1@MALL	ENST00000424988.1	intronic	hsa-mir-4436b-1
chr2	+	111003202	chr2	+	110245625	p1@LOC100507334	ENST00000568189.1	intergenic	hsa-mir-4436b-2
chr2	-	111435640	chr2	-	110678063	p1@BUB1	ENST00000535254.1	intronic	hsa-novelmir-895
chr2	+	111878492	chr2	+	111120915	p1@BCL2L11	NM_138624	intronic	hsa-novelmir-896
chr2	-	112252672	chr2	-	111495095	p1@ENST00000432818	ENST00000432818.1	intergenic	hsa-mir-4435-2
chr2	-	112641770	chr2	-	111884193	p1@ANAPC1	NM_022662	intronic	hsa-mir-4771-2
chr2	+	113033174	chr2	+	112275597	p1@ZC3H6	ENST00000409871.1	intronic	hsa-novelmir-898
chr2	+	113885175	chr2	+	113127598	p1@IL1RN	NM_173842	intronic	hsa-novelmir-901
chr2	+	113931550	chr2	+	113173973	p1@PSD4	ENST00000245796.6	intronic	hsa-novelmir-902,hsa-novelmir-903
chr2	-	114514191	chr2	-	113756614	p1@SLC35F5	ENST00000409106.1	intronic	hsa-novelmir-904,hsa-mir-4782
chr2	+	115695116	chr2	+	114937539	p@chr2:115695111..115695131,+	NM_001178036	intronic	hsa-novelmir-905
chr2	+	118572288	chr2	+	117814712	p1@DDX18	NM_006773	intronic	hsa-novelmir-907
chr2	-	118771646	chr2	-	118014070	p1@CCDC93	ENST00000376300.2	intronic	hsa-novelmir-908
chr2	+	121010507	chr2	+	120252931	p2@RALB	ENST00000470417.1	intronic	hsa-novelmir-910
chr2	+	121493457	chr2	+	120735881	p1@GLI2	ENST00000482119.1	intronic	hsa-novelmir-911,hsa-novelmir-912,hsa-novelmir-913
chr2	+	127413735	chr2	+	126656159	p1@GYPC	ENST00000459787.1	intronic	hsa-novelmir-914
chr2	-	128284065	chr2	-	127526489	p1@IWS1	ENST00000460511.1	intronic	hsa-novelmir-917
chr2	+	128459071	chr2	+	127701497	p1@SFT2D3	NM_032740	intronic	hsa-novelmir-918
chr2	-	130939169	chr2	-	130181596	p1@SMPD4	ENST00000426662.2	intronic	hsa-novelmir-921
chr2	-	132249968	chr2	-	131492395	p1@MZT2A	ENST00000445782.2	intronic	hsa-mir-4784
chr2	+	132250665	chr2	+	131493092	p1@ENST00000426369,p1@ENST00000538598,p1@ENST00000543513	ENST00000426369.1	intergenic	hsa-novelmir-924
chr2	-	133015262	chr2	-	132257689	p1@ANKRD30BL	NR_027020	intergenic	hsa-mir-663b
chr2	+	133174417	chr2	+	132416844	p1@GPR39	NM_001508	intronic	hsa-novelmir-925
chr2	-	134326034	chr2	-	133568463	p1@NCKAP5	ENST00000409213.1	intronic	hsa-novelmir-927,hsa-novelmir-926
chr2	+	134877506	chr2	+	134119935	p1@MGAT5	ENST00000481801.1	intronic	hsa-mir-3679
chr2	+	135596112	chr2	+	134838542	p2@ACMSD	ENST00000356140.5	intronic	hsa-mir-5590
chr2	-	136288754	chr2	-	135531184	p1@ZRANB3	ENST00000452187.2	intronic	hsa-novelmir-931,hsa-novelmir-929
chr2	+	136289068	chr2	+	135531498	p1@R3HDM1	ENST00000409478.1	intronic	hsa-mir-128-1
chr2	+	139259340	chr2	+	138501770	p1@SPOPL	NM_001001664	intronic	hsa-novelmir-936
chr2	-	142888533	chr2	-	142130964	p1@LRP1B	NM_018557	intronic	hsa-mir-7157
chr2	+	149632796	chr2	+	148875227	p1@KIF5C	ENST00000435030.1	intronic	hsa-novelmir-941
chr2	+	152214106	chr2	+	151357592	p1@TNFAIP6	NM_007115	intronic	hsa-mir-4773-1
chr2	-	152684935	chr2	-	151828421	p1@ARL5A	ENST00000446896.3	intronic	hsa-novelmir-944
chr2	+	153191688	chr2	+	152335174	p1@FMNL2	NM_052905	intronic	hsa-novelmir-945,hsa-novelmir-946
chr2	+	154728435	chr2	+	153871922	p1@GALNT13	NM_052917	intronic	hsa-novelmir-948
chr2	-	158300601	chr2	-	157444089	p1@CYTIP	ENST00000483929.1	intronic	hsa-novelmir-953
chr2	-	158732616	chr2	-	157876104	p1@ACVR1	NM_001111067	intronic	hsa-novelmir-954
chr2	+	159542444	chr2	+	158685932	p1@ENST00000449526	ENST00000449526.1	intergenic	hsa-novelmir-956
chr2	+	159825153	chr2	+	158968641	p1@TANC1	NM_033394	intronic	hsa-mir-6888
chr2	-	160143212	chr2	-	159286701	p1@WDSUB1	ENST00000358147.4	intronic	hsa-novelmir-957
chr2	-	160472987	chr2	-	159616476	p1@BAZ2B	ENST00000483316.1	intronic	hsa-novelmir-958
chr2	+	160569017	chr2	+	159712506	p1@MARCH7	ENST00000421037.1	intronic	hsa-novelmir-959
chr2	-	160654719	chr2	-	159798208	p1@CD302	ENST00000259053.4	intronic	hsa-novelmir-960
chr2	-	161350318	chr2	-	160493807	p1@RBMS1	NM_002897	intronic	hsa-mir-4785
chr2	-	161993319	chr2	-	161136808	p@chr2:161993307..161993324,-	ENST00000425470.1	intergenic	hsa-novelmir-961
chr2	-	165477986	chr2	-	164621476	p1@GRB14	ENST00000446413.2	intronic	hsa-novelmir-962
chr2	+	165697245	chr2	+	164840735	p1@ENST00000414885	ENST00000414885.1	intergenic	hsa-novelmir-964
chr2	-	168797690	chr2	-	167941180	p1@ENST00000436982	ENST00000436982.2	intergenic	hsa-novelmir-965
chr2	+	169312794	chr2	+	168456284	p1@CERS6	NM_001256126	intronic	hsa-mir-4774,hsa-novelmir-967
chr2	+	171785782	chr2	+	170929272	p1@GORASP2	ENST00000493692.1	intronic	hsa-novelmir-969
chr2	-	172017301	chr2	-	171160791	p1@TLK1	ENST00000431350.2	intronic	hsa-novelmir-971,hsa-novelmir-970
chr2	-	172290500	chr2	-	171433990	p1@METTL8	ENST00000442541.1	intronic	hsa-novelmir-973
chr2	-	172967628	chr2	-	172102900	p1@DLX2	ENST00000234198.4	intronic	hsa-novelmir-975
chr2	+	173292314	chr2	+	172427586	p1@ITGA6	NM_000210	intronic	hsa-novelmir-976
chr2	+	175411884	chr2	+	174547156	p1@ENST00000442996,p1@uc002uiw.2	ENST00000442996.1	intergenic	hsa-novelmir-980
chr2	-	175547607	chr2	-	174682879	p1@WIPF1	ENST00000359761.3	intronic	hsa-novelmir-979
chr2	-	176032928	chr2	-	175168200	p1@ATF2	ENST00000409635.1	intronic	hsa-mir-933
chr2	+	177001308	chr2	+	176136580	p1@HOXD3	ENST00000432796.2	intronic	hsa-mir-10b
chr2	+	177053396	chr2	+	176188668	p1@HOXD1	NM_024501	intronic	hsa-mir-7704
chr2	+	178077422	chr2	+	177212694	p2@HNRNPA3	NM_194247	intronic	hsa-mir-4444-1
chr2	-	178129432	chr2	-	177264704	p1@NFE2L2	ENST00000462023.1	intronic	hsa-mir-3128
chr2	-	178257419	chr2	-	177392691	p4@NFE2L2	NR_026966	intergenic	hsa-mir-6512
chr2	+	179059239	chr2	+	178194512	p1@OSBPL6	ENST00000409045.3	intronic	hsa-novelmir-983
chr2	+	179278703	chr2	+	178413976	p1@ENST00000420672,p1@ENST00000442036,p1@ENST00000450044,p1@ENST00000454488	ENST00000450044.1	intergenic	hsa-novelmir-984
chr2	-	179672149	chr2	-	178807422	p1@TTN	ENST00000342992.6	intronic	hsa-novelmir-985
chr2	-	180726047	chr2	-	179861320	p2@ZNF385B	NM_152520	intronic	hsa-mir-1258
chr2	+	181988657	chr2	+	181123930	p1@ENST00000424655,p1@ENST00000428474	ENST00000424655.1	intergenic	hsa-novelmir-987,hsa-novelmir-988
chr2	+	182819207	chr2	+	181954480	p1@PPP1R1C	ENST00000486067.1	intronic	hsa-novelmir-991
chr2	+	187454783	chr2	+	186590056	p1@ITGAV	NM_002210	intronic	hsa-novelmir-992
chr2	+	187868002	chr2	+	187003275	p1@ENST00000412276	ENST00000412276.1	intergenic	hsa-novelmir-993
chr2	+	189157555	chr2	+	188292828	p1@GULP1	ENST00000409580.1	intronic	hsa-mir-561,hsa-novelmir-995,hsa-novelmir-996
chr2	+	189839099	chr2	+	188974373	p1@COL3A1	NM_000090	intronic	hsa-mir-1245a,hsa-mir-3606,hsa-novelmir-997
chr2	-	190044487	chr2	-	189179761	p1@COL5A2	NM_000393	intronic	hsa-mir-3129
chr2	-	191184500	chr2	-	190319774	p1@HIBCH	ENST00000392332.3	intronic	hsa-novelmir-998
chr2	-	191399447	chr2	-	190534721	p1@TMEM194B	ENST00000409150.3	intronic	hsa-novelmir-999
chr2	+	191745547	chr2	+	190880821	p1@GLS	NM_014905	intronic	hsa-novelmir-1001
chr2	-	197036302	chr2	-	196171578	p1@STK17B	ENST00000263955.4	intronic	hsa-novelmir-1004
chr2	-	197041204	chr2	-	196176480	p5@STK17B	ENST00000409228.1	intronic	hsa-novelmir-1005
chr2	-	198175504	chr2	-	197310780	p1@ANKRD44	ENST00000463879.1	intronic	hsa-novelmir-1006
chr2	+	198318276	chr2	+	197453552	p1@COQ10B	NM_025147	intronic	hsa-novelmir-1007
chr2	-	198364564	chr2	-	197499840	p1@HSPD1	ENST00000418022.1	intronic	hsa-novelmir-1008
chr2	+	198365103	chr2	+	197500379	p1@HSPE1	ENST00000604458.1	intronic	hsa-novelmir-1009
chr2	-	198540311	chr2	-	197675587	p1@RFTN2	NM_144629	intronic	hsa-novelmir-1010
chr2	+	198570093	chr2	+	197705369	p1@MARS2	ENST00000282276.6	intronic	hsa-novelmir-1011
chr2	+	198669317	chr2	+	197804593	p1@PLCL1	NM_006226	intronic	hsa-novelmir-1012
chr2	+	201171277	chr2	+	200306554	p2@SPATS2L	ENST00000428692.1	intronic	hsa-novelmir-1014
chr2	-	201676089	chr2	-	200811366	p@chr2:201676085..201676097,-	ENST00000447972.3	intergenic	hsa-novelmir-1015
chr2	+	201980904	chr2	+	201116181	p1@CFLAR	ENST00000341222.6	intronic	hsa-novelmir-1018
chr2	-	202483901	chr2	-	201619178	p1@ALS2CR11	ENST00000450242.1	intronic	hsa-novelmir-1019
chr2	-	202508208	chr2	-	201643485	p1@TMEM237	ENST00000286196.5	intronic	hsa-novelmir-1021
chr2	+	204193027	chr2	+	203328304	p1@ABI2	NM_005759	intronic	hsa-novelmir-1024
chr2	-	204400023	chr2	-	203535300	p1@RAPH1	ENST00000465669.1	intronic	hsa-novelmir-1025
chr2	+	207630330	chr2	+	206765606	p1@FASTKD2	ENST00000403094.3	intronic	hsa-mir-3130-2
chr2	-	208030669	chr2	-	207165945	p1@KLF7	ENST00000309446.6	intronic	hsa-novelmir-1030,hsa-novelmir-1029,hsa-novelmir-1028,hsa-mir-2355
chr2	-	208394321	chr2	-	207529597	p@chr2:208394310..208394342,-	ENST00000412387.1	intergenic	hsa-novelmir-1031,hsa-mir-1302-4
chr2	-	208489985	chr2	-	207625261	p1@METTL21A	ENST00000458426.1	intronic	hsa-novelmir-1032
chr2	+	208576364	chr2	+	207711640	p1@CCNYL1	ENST00000295414.3	intronic	hsa-mir-4775
chr2	-	208890251	chr2	-	208025527	p1@PLEKHM3	NM_001080475	intronic	hsa-novelmir-1033
chr2	+	210288771	chr2	+	209424047	p1@MAP2	NM_001039538	intronic	hsa-novelmir-1035
chr2	+	211342414	chr2	+	210477690	p2@CPS1	ENST00000523702.1	intronic	hsa-novelmir-1036
chr2	-	213403906	chr2	-	212539182	p1@ERBB4	ENST00000342788.4	intronic	hsa-novelmir-1039,hsa-mir-548f-2
chr2	-	213866744	chr2	-	213002020	p@chr2:213866734..213866748,-	ENST00000415387.1	intergenic	hsa-mir-4776-2
chr2	+	214149204	chr2	+	213284480	p1@SPAG16	ENST00000452556.1	intronic	hsa-mir-4438,hsa-novelmir-1041
chr2	+	216522906	chr2	+	215658183	p@chr2:216522876..216522921,+	ENST00000417485.2	intergenic	hsa-novelmir-1043
chr2	-	218808793	chr2	-	217944070	p1@TNS1	NM_022648	intronic	hsa-novelmir-1047,hsa-novelmir-1046,hsa-mir-6809
chr2	-	219157226	chr2	-	218292503	p1@TMBIM1	ENST00000437694.2	intronic	hsa-mir-6513
chr2	+	219188022	chr2	+	218323299	p2@PNKD	NM_022572	intronic	hsa-mir-6810
chr2	+	219264593	chr2	+	218399870	p1@CTDSP1	NM_021198	intronic	hsa-mir-26b
chr2	-	219433060	chr2	-	218568337	p1@USP37	ENST00000415516.1	intronic	hsa-novelmir-1050
chr2	-	219524331	chr2	-	218659608	p1@ZNF142	ENST00000450765.1	intronic	hsa-novelmir-1052,hsa-novelmir-1051
chr2	+	219575603	chr2	+	218710880	p1@TTLL4	ENST00000392102.1	intronic	hsa-novelmir-1054
chr2	-	219866699	chr2	-	219001977	p@chr2:219866695..219866701,-	curation	intergenic	hsa-mir-375
chr2	-	219925643	chr2	-	219060921	p1@IHH	NM_002181	intronic	hsa-mir-3131
chr2	-	220083680	chr2	-	219218958	p1@ABCB6	ENST00000439002.2	intronic	hsa-novelmir-1055
chr2	-	220174103	chr2	-	219309381	p1@PTPRN	ENST00000409251.3	intronic	hsa-mir-153-1
chr2	+	220306765	chr2	+	219442043	p1@SPEG	ENST00000396698.1	intronic	hsa-novelmir-1058
chr2	+	220379207	chr2	+	219514485	p2@ACCN4	ENST00000347842.3	intronic	hsa-novelmir-1059
chr2	-	220417421	chr2	-	219552699	p4@OBSL1	curation	intronic	hsa-mir-3132
chr2	-	220436138	chr2	-	219571416	p1@OBSL1	ENST00000289656.3	intronic	hsa-novelmir-1060
chr2	+	220492352	chr2	+	219627630	p1@SLC4A3	ENST00000425141.1	intronic	hsa-novelmir-1062
chr2	-	222437024	chr2	-	221572304	p1@EPHA4	ENST00000443796.1	intronic	hsa-novelmir-1066
chr2	-	223520811	chr2	-	222656092	p1@FARSB	NM_005687	intronic	hsa-novelmir-1067
chr2	+	223725754	chr2	+	222861036	p1@ACSL3	ENST00000357430.3	intronic	hsa-novelmir-1068
chr2	-	225907185	chr2	-	225042468	p1@DOCK10	ENST00000258390.7	intronic	hsa-novelmir-1075,hsa-novelmir-1074,hsa-novelmir-1073,hsa-novelmir-1072,hsa-novelmir-1071,hsa-novelmir-1070,hsa-mir-4439
chr2	-	227526624	chr2	-	226661908	p@chr2:227526618..227526629,-	curation	intergenic	hsa-mir-5702
chr2	-	227664529	chr2	-	226799813	p1@IRS1	ENST00000305123.5	intronic	hsa-novelmir-1076
chr2	+	227700271	chr2	+	226835555	p6@RHBDD1	ENST00000424132.1	intronic	hsa-novelmir-1077
chr2	+	227700770	chr2	+	226836054	p1@RHBDD1	ENST00000448992.1	intronic	hsa-novelmir-1078
chr2	-	228028921	chr2	-	227164205	p1@COL4A4	ENST00000396625.3	intronic	hsa-novelmir-1080
chr2	-	231084690	chr2	-	230219975	p1@SP110	ENST00000358662.4	intronic	hsa-novelmir-1085
chr2	+	232063345	chr2	+	231198631	p1@ARMC9	NM_001271466	intronic	hsa-mir-4777
chr2	+	232573240	chr2	+	231708530	p1@PTMA	ENST00000481928.1	intronic	hsa-mir-1244-1
chr2	+	232826423	chr2	+	231961713	p1@DIS3L2	ENST00000445090.1	intronic	hsa-mir-562
chr2	-	233415267	chr2	-	232550557	p1@TIGD1	ENST00000408957.3	intronic	hsa-mir-5001
chr2	+	233562041	chr2	+	232697331	p1@GIGYF2	ENST00000488629.1	intronic	hsa-novelmir-1090
chr2	+	236402740	chr2	+	235494096	p1@AGAP1	NM_001037131	intronic	hsa-novelmir-1093
chr2	+	237478468	chr2	+	236569825	p1@CXCR7	NM_020311	intronic	hsa-novelmir-1095
chr2	+	238395894	chr2	+	237487251	p1@MLPH	ENST00000468178.1	intronic	hsa-mir-6811,hsa-novelmir-1098
chr2	-	238499732	chr2	-	237591089	p2@RAB17	ENST00000264601.3	intronic	hsa-novelmir-1099
chr2	+	238875656	chr2	+	237967014	p1@SCLY,p1@UBE2F	ENST00000433568.1	intronic	hsa-novelmir-1102
chr2	-	239112336	chr2	-	238203695	p1@ILKAP	NM_030768	intronic	hsa-novelmir-1103
chr2	+	239335694	chr2	+	238427053	p1@ASB1	ENST00000438264.1	intronic	hsa-novelmir-1104
chr2	-	240322714	chr2	-	239401020	p1@HDAC4	NM_006037	intronic	hsa-novelmir-1107,hsa-mir-4441,hsa-mir-4440,hsa-mir-2467
chr2	-	240964749	chr2	-	240025332	p1@NDUFA10	curation	intronic	hsa-mir-4786
chr2	+	241375107	chr2	+	240435690	p1@GPC1	NM_002081	intronic	hsa-mir-149,hsa-novelmir-1108
chr2	+	241507907	chr2	+	240568490	p1@RNPEPL1	NM_018226	intronic	hsa-novelmir-1110
chr2	-	241508146	chr2	-	240568729	p@chr2:241508140..241508186,-	ENST00000418708.1	intronic	hsa-novelmir-1109
chr2	-	241759636	chr2	-	240820219	p1@KIF1A	ENST00000320389.7	intronic	hsa-novelmir-1113,hsa-novelmir-1112,hsa-novelmir-1111
chr2	+	241938035	chr2	+	240998618	p1@SNED1	NM_001080437	intronic	hsa-novelmir-1115
chr2	-	242003533	chr2	-	241064116	p1@ENST00000458377	ENST00000458377.1	intergenic	hsa-novelmir-1116
chr2	-	242041702	chr2	-	241102287	p1@MTERFD2	ENST00000401626.2	intronic	hsa-novelmir-1117
chr2	+	242295700	chr2	+	241356285	p1@FARP2	NM_014808	intronic	hsa-mir-3133
chr2	-	242576655	chr2	-	241637240	p2@THAP4	NM_015963	intronic	hsa-novelmir-1120
chr2	+	242577108	chr2	+	241637693	p1@ATG4B	ENST00000474739.2	intronic	hsa-novelmir-1121
chr2	+	242641455	chr2	+	241702040	p1@ING5	ENST00000313552.6	intronic	hsa-novelmir-1122
chr2	+	242674045	chr2	+	241734630	p1@D2HGDH	ENST00000400769.2	intronic	hsa-novelmir-1123
chr3	-	3221375	chr3	-	3179691	p1@CRBN	ENST00000491834.1	intronic	hsa-novelmir-1125
chr3	+	5163977	chr3	+	5122292	p1@ARL8B	ENST00000444332.1	intronic	hsa-novelmir-1127
chr3	+	8775488	chr3	+	8733802	p1@CAV3	ENST00000472766.1	intronic	hsa-novelmir-1128,hsa-novelmir-1129
chr3	-	9005127	chr3	-	8963443	p1@RAD18	ENST00000415439.1	intronic	hsa-novelmir-1130
chr3	-	9291330	chr3	-	9249646	p1@SRGAP3	NM_001033117	intronic	hsa-novelmir-1132,hsa-novelmir-1131
chr3	-	9439123	chr3	-	9397439	p1@ENST00000494680	ENST00000494680.2	intergenic	hsa-novelmir-1133
chr3	+	9439299	chr3	+	9397615	p1@SETD5	NM_001080517	intronic	hsa-novelmir-1134,hsa-novelmir-1135
chr3	+	9791636	chr3	+	9749952	p2@OGG1	NM_016828	intronic	hsa-novelmir-1136
chr3	-	9811631	chr3	-	9769947	p1@CAMK1	ENST00000397277.2	intronic	hsa-novelmir-1137
chr3	+	9860660	chr3	+	9818976	p5@TTLL3	ENST00000455274.1	intronic	hsa-novelmir-1139
chr3	-	9885692	chr3	-	9844008	p1@RPUSD3	ENST00000418713.1	intronic	hsa-novelmir-1138
chr3	+	9944534	chr3	+	9902850	p1@IL17RE	ENST00000383815.3	intronic	hsa-novelmir-1140
chr3	+	9989043	chr3	+	9947359	p1@PRRT3-AS1	NR_046734	intergenic	hsa-novelmir-1141
chr3	+	10028600	chr3	+	9986916	p1@ENST00000326237,p1@uc003bup.1,p1@uc003buq.1	XR_110030	intergenic	hsa-novelmir-1142
chr3	+	10206603	chr3	+	10164919	p1@IRAK2	NM_001570	intronic	hsa-novelmir-1143
chr3	-	10547268	chr3	-	10505584	p1@ATP2B2	NM_001683	intronic	hsa-mir-885
chr3	+	11196179	chr3	+	11154493	p1@HRH1	ENST00000431010.2	intronic	hsa-novelmir-1144
chr3	-	12586985	chr3	-	12545486	p1@LOC100129480	ENST00000567514.1	intronic	hsa-novelmir-1146
chr3	+	12838181	chr3	+	12796682	p1@CAND2	ENST00000456430.2	intronic	hsa-novelmir-1147
chr3	-	13009230	chr3	-	12967730	p1@IQSEC1	ENST00000273221.4	intronic	hsa-novelmir-1150,hsa-novelmir-1149,hsa-novelmir-1148
chr3	-	13461792	chr3	-	13420292	p1@NUP210	NM_024923	intronic	hsa-novelmir-1153,hsa-novelmir-1152
chr3	+	13590657	chr3	+	13549157	p1@FBLN2	ENST00000295760.7	intronic	hsa-novelmir-1155
chr3	+	14693269	chr3	+	14651762	p1@C3orf19	ENST00000463438.1	intronic	hsa-novelmir-1157
chr3	-	15374093	chr3	-	15332586	p1@SH3BP5	ENST00000253688.5	intronic	hsa-novelmir-1158
chr3	-	15563196	chr3	-	15521689	p1@COLQ	ENST00000383786.5	intronic	hsa-mir-4270
chr3	-	15839486	chr3	-	15797979	p1@ANKRD28	NM_001195098	intronic	hsa-novelmir-1159,hsa-mir-3134
chr3	+	16926495	chr3	+	16885002	p1@PLCL2	ENST00000418129.2	intronic	hsa-mir-3714,hsa-novelmir-1161
chr3	-	17784107	chr3	-	17742615	p1@TBC1D5	NM_001134380	intronic	hsa-novelmir-1162
chr3	-	19988475	chr3	-	19946983	p1@EFHB	ENST00000344838.4	intronic	hsa-novelmir-1163
chr3	+	20081895	chr3	+	20040403	p1@KAT2B	NM_003884	intronic	hsa-mir-3135a
chr3	+	25824487	chr3	+	25782996	p4@OXSM	ENST00000464688.1	intronic	hsa-novelmir-1168
chr3	-	27410874	chr3	-	27369383	p1@NEK10	ENST00000429845.2	intronic	hsa-novelmir-1169
chr3	-	27525875	chr3	-	27484384	p1@SLC4A7	NM_001258379	intronic	hsa-novelmir-1170
chr3	+	29322562	chr3	+	29281071	p1@RBMS3	ENST00000434693.2	intronic	hsa-novelmir-1171
chr3	+	30648093	chr3	+	30606601	p1@TGFBR2	ENST00000359013.4	intronic	hsa-novelmir-1173
chr3	-	32022754	chr3	-	31981262	p1@OSBPL10	ENST00000438237.2	intronic	hsa-novelmir-1174
chr3	+	32859530	chr3	+	32818038	p1@TRIM71	NM_001039111	intronic	hsa-novelmir-1175
chr3	-	33759732	chr3	-	33718240	p1@CLASP2	NM_015097	intronic	hsa-novelmir-1176
chr3	+	33840126	chr3	+	33798634	p1@PDCD6IP	ENST00000477798.1	intronic	hsa-novelmir-1177
chr3	+	35721116	chr3	+	35679624	p1@ARPP21	ENST00000417925.1	intronic	hsa-mir-128-2
chr3	+	37284762	chr3	+	37243271	p1@GOLGA4	ENST00000429018.1	intronic	hsa-novelmir-1179,hsa-novelmir-1180
chr3	+	37903371	chr3	+	37861880	p1@CTDSPL	ENST00000443503.2	intronic	hsa-mir-26a-1,hsa-novelmir-1181,hsa-novelmir-1182
chr3	-	38071133	chr3	-	38029642	p1@PLCD1	NM_006225	intronic	hsa-novelmir-1183
chr3	+	38388299	chr3	+	38346808	p1@XYLB	ENST00000424034.1	intronic	hsa-novelmir-1186
chr3	+	39149171	chr3	+	39107680	p1@TTC21A	NM_145755	intronic	hsa-mir-6822
chr3	-	39195082	chr3	-	39153591	p1@CSRNP1	ENST00000273153.5	intronic	hsa-novelmir-1189,hsa-novelmir-1188
chr3	+	39851100	chr3	+	39809609	p1@MYRIP	ENST00000302541.6	intronic	hsa-novelmir-1190,hsa-novelmir-1191
chr3	+	40807698	chr3	+	40766207	p1@ENST00000412811	ENST00000412811.1	intergenic	hsa-novelmir-1192
chr3	+	41281504	chr3	+	41240013	p1@U38440	ENST00000471014.1	intronic	hsa-novelmir-1194
chr3	+	42055145	chr3	+	42013653	p1@TRAK1	ENST00000487159.1	intronic	hsa-novelmir-1195,hsa-novelmir-1196
chr3	+	42544135	chr3	+	42502643	p1@VIPR1	ENST00000439731.1	intronic	hsa-novelmir-1198
chr3	-	42642586	chr3	-	42601094	p5@SEC22C	NM_001201572	intronic	hsa-novelmir-1199
chr3	+	42695156	chr3	+	42653664	p1@ZBTB47	NM_145166	intronic	hsa-novelmir-1200
chr3	+	42846155	chr3	+	42804663	p3@CCBP2	ENST00000565749.1	intronic	hsa-novelmir-1201
chr3	-	43663474	chr3	-	43621982	p1@ANO10	ENST00000396091.3	intronic	hsa-novelmir-1202
chr3	+	43732430	chr3	+	43690938	p1@ABHD5	NM_016006	intronic	hsa-novelmir-1203
chr3	+	44040825	chr3	+	43999333	p@chr3:44040816..44040834,+	curation	intergenic	hsa-mir-138-1
chr3	+	44158481	chr3	+	44116989	p@chr3:44158442..44158484,+	ENST00000568686.1	intergenic	hsa-novelmir-1206
chr3	-	44519146	chr3	-	44477654	p1@ZNF445	NM_181489	intronic	hsa-novelmir-1207
chr3	+	44887348	chr3	+	44845856	p@chr3:44887345..44887348,+	ENST00000422209.1	intronic	hsa-novelmir-1208
chr3	+	44903010	chr3	+	44861518	p3@TMEM42	ENST00000302392.4	intronic	hsa-mir-564
chr3	+	45636243	chr3	+	45594751	p4@LIMD1	NM_014240	intronic	hsa-novelmir-1211
chr3	-	46037316	chr3	-	45995824	p1@FYCO1	NM_024513	intronic	hsa-novelmir-1212
chr3	+	46622894	chr3	+	46581404	p@chr3:46622883..46622899,+	ENST00000505797.1	intronic	hsa-novelmir-1213
chr3	-	47018235	chr3	-	46976745	p1@CCDC12	ENST00000494655.1	intronic	hsa-novelmir-1215,hsa-novelmir-1214
chr3	-	47823383	chr3	-	47781893	p1@SMARCC1	NM_003074	intronic	hsa-novelmir-1219,hsa-novelmir-1218
chr3	+	47866505	chr3	+	47825015	p1@DHX30	ENST00000457607.1	intronic	hsa-mir-1226
chr3	-	48370679	chr3	-	48329189	p@chr3:48370674..48370679,-	curation	intronic	hsa-mir-2115
chr3	-	48470753	chr3	-	48429344	p1@PLXNB1	NM_002673	intronic	hsa-novelmir-1221
chr3	-	48594236	chr3	-	48556803	p1@PFKFB4	NM_004567	intronic	hsa-mir-6823
chr3	-	48598562	chr3	-	48561129	p3@PFKFB4	ENST00000536104.1	intronic	hsa-novelmir-1223
chr3	-	48632732	chr3	-	48595299	p1@COL7A1	ENST00000328333.8	intronic	hsa-novelmir-1224,hsa-mir-711
chr3	-	48672894	chr3	-	48635461	p1@SLC26A6	ENST00000383733.3	intronic	hsa-novelmir-1226,hsa-mir-6824
chr3	-	48700319	chr3	-	48662886	p1@CELSR3	NM_001407	intronic	hsa-novelmir-1228,hsa-novelmir-1227,hsa-mir-4793
chr3	-	48723326	chr3	-	48685893	p1@NCKIPSD	ENST00000416649.2	intronic	hsa-novelmir-1230
chr3	+	49027674	chr3	+	48990241	p1@P4HTM	ENST00000444213.1	intronic	hsa-novelmir-1231
chr3	+	49044832	chr3	+	49007399	p1@WDR6	ENST00000452875.1	intronic	hsa-novelmir-1232
chr3	+	49057885	chr3	+	49020452	p5@NDUFAF3	ENST00000326912.4	intronic	hsa-novelmir-1234
chr3	-	49058938	chr3	-	49021505	p2@DALRD3	ENST00000313778.5	intronic	hsa-mir-191,hsa-mir-425
chr3	-	49142190	chr3	-	49104757	p1@QARS	ENST00000430182.1	intronic	hsa-mir-6890
chr3	-	49449406	chr3	-	49411973	p1@RHOA	ENST00000422781.1	intronic	hsa-novelmir-1236
chr3	+	49726991	chr3	+	49689558	p1@RNF123	ENST00000486102.1	intronic	hsa-novelmir-1237,hsa-novelmir-1238,hsa-novelmir-1239
chr3	-	49851379	chr3	-	49813946	p1@UBA7	ENST00000333486.3	intronic	hsa-mir-5193
chr3	+	50192515	chr3	+	50155082	p1@SEMA3F	ENST00000413852.1	intronic	hsa-mir-566
chr3	+	50264502	chr3	+	50227070	p2@GNAI2	ENST00000446079.1	intronic	hsa-mir-5787
chr3	+	50306603	chr3	+	50269171	p1@SEMA3B	ENST00000454314.1	intergenic	hsa-mir-6872
chr3	-	50336803	chr3	-	50299372	p1@NAT6	ENST00000443842.1	intronic	hsa-novelmir-1240
chr3	-	50378400	chr3	-	50340969	p5@RASSF1	ENST00000478619.1	intronic	hsa-novelmir-1242
chr3	+	50606953	chr3	+	50569522	p1@HEMK1	ENST00000455834.1	intronic	hsa-novelmir-1243
chr3	-	50649205	chr3	-	50611774	p1@CISH	ENST00000443053.2	intronic	hsa-novelmir-1244
chr3	+	50654582	chr3	+	50617151	p1@MAPKAPK3	ENST00000357955.2	intronic	hsa-novelmir-1245
chr3	+	50712367	chr3	+	50674936	p1@MIR4787	NM_004947	intronic	hsa-mir-4787
chr3	+	51705268	chr3	+	51671252	p1@TEX264	ENST00000415259.1	intronic	hsa-novelmir-1248
chr3	-	51975919	chr3	-	51941903	p1@RRP9	NM_004704	intronic	hsa-novelmir-1249
chr3	-	52008065	chr3	-	51974049	p1@ABHD14A-ACY1,p1@ABHD14B,p1@PCBP4	ENST00000488257.1	intergenic	hsa-novelmir-1250
chr3	+	52017551	chr3	+	51983535	p1@ACY1	ENST00000465121.1	intronic	hsa-novelmir-1251
chr3	-	52090582	chr3	-	52056566	p1@DUSP7	ENST00000495880.1	intronic	hsa-novelmir-1254,hsa-novelmir-1253
chr3	-	52312661	chr3	-	52278645	p1@WDR82	NM_025222	intronic	hsa-let-7g
chr3	-	52322036	chr3	-	52288020	p3@WDR82	ENST00000463624.1	intronic	hsa-novelmir-1255
chr3	-	52332920	chr3	-	52298904	p1@GLYCTK-AS1	ENST00000493616.1	intergenic	hsa-mir-135a-1
chr3	+	52408571	chr3	+	52374555	p@chr3:52408563..52408587,+	NM_015512	intronic	hsa-novelmir-1256
chr3	+	52489646	chr3	+	52455630	p1@NISCH	NM_007184	intronic	hsa-novelmir-1258
chr3	+	52529354	chr3	+	52495338	p1@STAB1	ENST00000321725.6	intronic	hsa-novelmir-1259
chr3	-	52567828	chr3	-	52533812	p1@NT5DC2	NM_001134231	intronic	hsa-novelmir-1260
chr3	-	52931564	chr3	-	52897548	p1@TMEM110-MUSTN1,p1@TMEM110	ENST00000504329.1	intronic	hsa-mir-8064
chr3	-	53080089	chr3	-	53046073	p1@SFMBT1	NM_016329	intronic	hsa-novelmir-1262
chr3	-	53133396	chr3	-	53099380	p@chr3:53133393..53133396,-	ENST00000607495.1	intronic	hsa-novelmir-1264
chr3	-	53164451	chr3	-	53130435	p1@RFT1	ENST00000394738.3	intronic	hsa-novelmir-1265
chr3	+	53528697	chr3	+	53494670	p1@CACNA1D	ENST00000350061.5	intronic	hsa-novelmir-1268
chr3	+	54660221	chr3	+	54626194	p1@RPS15P5	ENST00000468658.1	intronic	hsa-novelmir-1270
chr3	-	56502387	chr3	-	56468359	p1@ERC2	NM_015576	intronic	hsa-mir-3938
chr3	-	56835977	chr3	-	56801949	p1@ARHGEF3	ENST00000465659.1	intronic	hsa-novelmir-1273
chr3	-	57678804	chr3	-	57693077	p1@FAM116A	NM_152678	intronic	hsa-novelmir-1274
chr3	+	57994149	chr3	+	58008422	p1@FLNB	NM_001164317	intronic	hsa-novelmir-1276
chr3	+	58318664	chr3	+	58332937	p1@PXK	ENST00000479241.1	intronic	hsa-novelmir-1277
chr3	-	61237126	chr3	-	61251452	p1@FHIT	ENST00000492590.1	intronic	hsa-mir-548bb
chr3	-	64431169	chr3	-	64445493	p1@ENST00000485770	ENST00000569824.1	intronic	hsa-novelmir-1278
chr3	-	64673676	chr3	-	64688000	p1@ADAMTS9	ENST00000498707.1	intronic	hsa-novelmir-1279
chr3	-	66024517	chr3	-	66038842	p1@MAGI1	NM_001033057	intronic	hsa-novelmir-1285,hsa-novelmir-1284,hsa-novelmir-1283
chr3	-	69101425	chr3	-	69052274	p1@TMF1	ENST00000488010.1	intronic	hsa-mir-3136
chr3	-	69591734	chr3	-	69542583	p1@FRMD4B	ENST00000459638.1	intronic	hsa-novelmir-1290
chr3	-	71179737	chr3	-	71130586	p2@FOXP1	ENST00000497355.1	intronic	hsa-novelmir-1292
chr3	-	71631104	chr3	-	71581953	p3@FOXP1	NM_001244808	intronic	hsa-novelmir-1294,hsa-novelmir-1293
chr3	-	71632873	chr3	-	71583722	p4@FOXP1	ENST00000471386.2	intronic	hsa-mir-1284
chr3	-	73674092	chr3	-	73624941	p1@PDZRN3	ENST00000263666.4	intronic	hsa-novelmir-1297
chr3	-	75484221	chr3	-	75435070	p1@FAM86DP	ENST00000497543.1	intergenic	hsa-novelmir-1300
chr3	-	79817143	chr3	-	79767993	p4@ROBO1	NM_002941	intronic	hsa-novelmir-1302
chr3	+	85008142	chr3	+	84958991	p1@CADM2	NM_001167675	intronic	hsa-mir-5688,hsa-novelmir-1303
chr3	-	87040271	chr3	-	86991121	p1@VGLL3	ENST00000383698.3	intronic	hsa-novelmir-1304
chr3	-	87276787	chr3	-	87227637	p@chr3:87276777..87276792,-	curation	intergenic	hsa-mir-4795
chr3	+	96533438	chr3	+	96814594	p1@EPHA6	ENST00000389672.5	intronic	hsa-novelmir-1307
chr3	+	97540889	chr3	+	97822045	p1@CRYBG3	NM_153605	intronic	hsa-novelmir-1308
chr3	-	99833291	chr3	-	100114447	p4@FILIP1L	NM_182909	intronic	hsa-mir-3921
chr3	+	100428362	chr3	+	100709518	p1@TFG	NM_001195478	intronic	hsa-novelmir-1310,hsa-novelmir-1311
chr3	+	101568358	chr3	+	101849514	p1@NFKBIZ	NM_031419	intronic	hsa-novelmir-1313
chr3	+	105085753	chr3	+	105366909	p1@ALCAM	ENST00000306107.5	intronic	hsa-novelmir-1316,hsa-novelmir-1317
chr3	-	106959485	chr3	-	107240638	p1@LOC100302640	NR_028303	intergenic	hsa-novelmir-1319
chr3	+	107241816	chr3	+	107522969	p1@BBX	ENST00000325805.8	intronic	hsa-novelmir-1320
chr3	-	108190373	chr3	-	108471526	p@chr3:108190358..108190378,-	NM_014981	intronic	hsa-novelmir-1322
chr3	+	109282223	chr3	+	109563376	p@chr3:109282218..109282225,+	curation	intergenic	hsa-mir-4445
chr3	+	111261063	chr3	+	111542216	p1@CD96	ENST00000494798.1	intronic	hsa-novelmir-1325
chr3	+	111805236	chr3	+	112086389	p1@C3orf52	ENST00000264848.5	intronic	hsa-mir-567
chr3	-	112218319	chr3	-	112499472	p1@BTLA	NM_001085357	intronic	hsa-novelmir-1327
chr3	+	112280959	chr3	+	112562112	p1@SLC35A5	ENST00000261034.2	intronic	hsa-novelmir-1329
chr3	-	113160340	chr3	-	113441493	p1@WDR52	ENST00000488854.2	intronic	hsa-mir-8076
chr3	+	113251413	chr3	+	113532566	p1@SIDT1	NM_017699	intronic	hsa-mir-4446,hsa-novelmir-1331
chr3	+	113557736	chr3	+	113838889	p1@GRAMD1C	ENST00000472384.1	intronic	hsa-novelmir-1332
chr3	+	113729490	chr3	+	114010643	p@chr3:113729489..113729493,+	ENST00000472599.1	intronic	hsa-novelmir-1333
chr3	-	114866107	chr3	-	115147260	p2@ZBTB20	ENST00000488663.1	intronic	hsa-mir-4796
chr3	-	116164323	chr3	-	116445476	p1@LSAMP	ENST00000490035.2	intronic	hsa-novelmir-1336,hsa-novelmir-1335
chr3	-	117716426	chr3	-	117997579	p1@ENST00000484092	ENST00000539563.1	intronic	hsa-novelmir-1338,hsa-novelmir-1337,hsa-mir-4447
chr3	+	119013230	chr3	+	119294383	p1@ARHGAP31	NM_020754	intronic	hsa-novelmir-1339,hsa-novelmir-1340
chr3	-	120169838	chr3	-	120450991	p1@FSTL1	NM_007085	intronic	hsa-mir-198
chr3	-	120461363	chr3	-	120742516	p1@RABL3	ENST00000485161.1	intronic	hsa-novelmir-1341
chr3	+	120627072	chr3	+	120908225	p1@STXBP5L	ENST00000461772.1	intronic	hsa-mir-5682
chr3	-	121379750	chr3	-	121660903	p1@HCLS1	ENST00000428394.2	intronic	hsa-novelmir-1343,hsa-novelmir-1342
chr3	+	122399706	chr3	+	122680859	p2@PARP14	NM_017554	intronic	hsa-novelmir-1344,hsa-novelmir-1345
chr3	+	122785923	chr3	+	123067076	p1@PDIA5	ENST00000316218.7	intronic	hsa-mir-7110,hsa-novelmir-1346
chr3	+	123805455	chr3	+	124086608	p@chr3:123805454..123805455,+	ENST00000477496.1	intronic	hsa-novelmir-1347
chr3	+	123813572	chr3	+	124094725	p4@KALRN	NM_001024660	intronic	hsa-mir-5002,hsa-mir-6083
chr3	+	124449300	chr3	+	124730453	p1@UMPS	ENST00000474588.1	intronic	hsa-mir-544b
chr3	-	124606081	chr3	-	124887234	p1@ITGB5	NM_002213	intronic	hsa-novelmir-1349
chr3	-	124842460	chr3	-	125123616	p2@SLC12A8	ENST00000483944.1	intronic	hsa-novelmir-1350
chr3	-	124931590	chr3	-	125212746	p4@SLC12A8	NM_024628	intronic	hsa-mir-5092
chr3	-	125094103	chr3	-	125375259	p1@ZNF148	ENST00000492394.1	intronic	hsa-novelmir-1351
chr3	-	125899426	chr3	-	126180583	p1@ALDH1L1	ENST00000452905.2	intronic	hsa-novelmir-1353
chr3	+	126710282	chr3	+	126991439	p@chr3:126710279..126710302,+	NM_032242	intronic	hsa-novelmir-1354
chr3	-	127309576	chr3	-	127590733	p1@TPRA1	ENST00000393400.2	intronic	hsa-mir-6825,hsa-mir-7976
chr3	-	127317074	chr3	-	127598231	p6@TPRA1	ENST00000490643.1	intronic	hsa-novelmir-1356
chr3	+	127391799	chr3	+	127672956	p1@ABTB1	ENST00000453791.2	intronic	hsa-novelmir-1357
chr3	-	127542028	chr3	-	127823185	p1@MGLL	ENST00000434178.2	intronic	hsa-novelmir-1358
chr3	+	127771285	chr3	+	128052442	p1@SEC61A1	NM_013336	intronic	hsa-novelmir-1359
chr3	+	127872326	chr3	+	128153483	p1@EEFSEC	NM_021937	intronic	hsa-novelmir-1360
chr3	+	128445026	chr3	+	128726183	p1@RAB7A	ENST00000482525.1	intronic	hsa-novelmir-1361
chr3	+	128968449	chr3	+	129249606	p1@COPG	ENST00000314797.6	intronic	hsa-mir-6826,hsa-novelmir-1362
chr3	+	129159090	chr3	+	129440247	p1@IFT122	ENST00000349441.2	intronic	hsa-novelmir-1365
chr3	+	129813181	chr3	+	130094338	p@chr3:129813179..129813193,+	ENST00000511726.1	intergenic	hsa-novelmir-1369
chr3	-	131963128	chr3	-	132244284	p1@ENST00000479738	ENST00000512055.1	intronic	hsa-mir-5704
chr3	+	132379215	chr3	+	132660371	p1@UBA5	ENST00000494238.2	intronic	hsa-novelmir-1370
chr3	-	133748769	chr3	-	134029925	p1@SLCO2A1	ENST00000481359.3	intronic	hsa-novelmir-1371
chr3	-	133788696	chr3	-	134069852	p@chr3:133788694..133788698,-	ENST00000484106.1	intronic	hsa-novelmir-1373
chr3	-	134075206	chr3	-	134356364	p1@RPL39P5,p6@AMOTL2	ENST00000273411.2	intergenic	hsa-novelmir-1374
chr3	-	134093289	chr3	-	134374447	p1@AMOTL2	ENST00000422605.2	intronic	hsa-novelmir-1375,hsa-mir-6827
chr3	+	134151287	chr3	+	134432445	p@chr3:134151281..134151311,+	XR_108490	intergenic	hsa-mir-4788
chr3	+	135684600	chr3	+	135965758	p1@PPP2R3A	ENST00000490467.1	intronic	hsa-novelmir-1376
chr3	-	136471220	chr3	-	136752378	p1@STAG1	ENST00000236698.5	intronic	hsa-novelmir-1377
chr3	+	138666076	chr3	+	138947234	p1@C3orf72	NM_001040061	intronic	hsa-novelmir-1378
chr3	-	139258478	chr3	-	139539636	p1@RBP1	ENST00000487424.2	intronic	hsa-novelmir-1379
chr3	-	142297565	chr3	-	142578723	p1@ATR	ENST00000507148.1	intronic	hsa-novelmir-1381
chr3	+	142720444	chr3	+	143001602	p1@U2SURP	ENST00000461591.1	intronic	hsa-novelmir-1382
chr3	-	143567300	chr3	-	143848458	p1@SLC9A9	NM_173653	intronic	hsa-novelmir-1386,hsa-novelmir-1384
chr3	+	147111247	chr3	+	147393460	p3@ZIC1	ENST00000472523.1	intronic	hsa-novelmir-1388,hsa-novelmir-1389
chr3	-	148939611	chr3	-	149221824	p1@CP	ENST00000490639.1	intronic	hsa-novelmir-1392
chr3	+	150804444	chr3	+	151086657	p3@MED12L	NM_053002	intronic	hsa-novelmir-1397
chr3	+	151986721	chr3	+	152268932	p1@MBNL1	ENST00000495875.2	intronic	hsa-novelmir-1399,hsa-novelmir-1400,hsa-novelmir-1401,hsa-novelmir-1402
chr3	-	154042251	chr3	-	154324462	p1@DHX36	ENST00000308361.6	intronic	hsa-novelmir-1404
chr3	+	156799575	chr3	+	157081786	p1@ENST00000469196	ENST00000469196.1	intergenic	hsa-novelmir-1408
chr3	+	158991033	chr3	+	159273244	p1@IQCJ-SCHIP1,p9@SCHIP1	ENST00000337808.6	intronic	hsa-mir-3919
chr3	+	159482263	chr3	+	159764474	p2@SCHIP1	ENST00000460298.1	intronic	hsa-novelmir-1413
chr3	+	160117438	chr3	+	160399650	p1@SMC4	ENST00000467468.1	intronic	hsa-mir-15b,hsa-mir-16-2
chr3	-	160167548	chr3	-	160449760	p1@TRIM59	ENST00000483754.1	intronic	hsa-novelmir-1415
chr3	+	160473372	chr3	+	160755584	p1@PPM1L	ENST00000497343.1	intronic	hsa-novelmir-1417
chr3	+	160822469	chr3	+	161104681	p3@NMD3	ENST00000468606.1	intronic	hsa-novelmir-1418,hsa-novelmir-1419
chr3	+	167967453	chr3	+	168249665	p1@EGFEM1P	NR_021485	intergenic	hsa-mir-551b,hsa-novelmir-1423
chr3	+	170136656	chr3	+	170418868	p1@CLDN11	ENST00000486975.1	intronic	hsa-mir-6828
chr3	-	171178194	chr3	-	171460405	p1@TNIK	NM_001161566	intronic	hsa-mir-569
chr3	+	171757409	chr3	+	172039619	p1@FNDC3B	NM_022763	intronic	hsa-novelmir-1425
chr3	+	174577124	chr3	+	174859334	p2@NAALADL2	NM_207015	intronic	hsa-mir-4789
chr3	-	178502661	chr3	-	178784873	p@chr3:178502658..178502663,-	ENST00000437488.1	intergenic	hsa-novelmir-1430
chr3	-	178789593	chr3	-	179071805	p1@ZMAT3	NM_022470	intronic	hsa-novelmir-1431
chr3	+	180319987	chr3	+	180602199	p1@TTC14	ENST00000465065.1	intronic	hsa-novelmir-1432
chr3	-	180588307	chr3	-	180870519	p1@CCDC39	ENST00000471307.2	intronic	hsa-novelmir-1434
chr3	+	180630459	chr3	+	180912671	p1@FXR1	ENST00000491062.1	intronic	hsa-novelmir-1435
chr3	-	183273494	chr3	-	183555706	p1@KLHL6	NM_130446	intronic	hsa-novelmir-1436
chr3	+	183415594	chr3	+	183697806	p1@YEATS2	NM_018023	intronic	hsa-novelmir-1438,hsa-novelmir-1439
chr3	+	183602760	chr3	+	183884972	p1@ENST00000445165	ENST00000445165.1	intergenic	hsa-mir-4448
chr3	+	183723819	chr3	+	184006031	p1@ABCC5-AS1	NR_046570	intergenic	hsa-novelmir-1441
chr3	-	183735672	chr3	-	184017884	p1@ABCC5	ENST00000437205.1	intronic	hsa-novelmir-1440
chr3	+	183853170	chr3	+	184135382	p1@EIF2B5	ENST00000444495.1	intronic	hsa-novelmir-1442
chr3	+	183892643	chr3	+	184174855	p1@AP2M1	ENST00000444495.1	intronic	hsa-novelmir-1443,hsa-novelmir-1444,hsa-novelmir-1445
chr3	+	183947373	chr3	+	184229585	p@chr3:183947366..183947381,+	XM_011513288.1	intronic	hsa-mir-1224
chr3	-	184971837	chr3	-	185254049	p1@EHHADH	ENST00000456310.1	intronic	hsa-mir-5588
chr3	+	185300286	chr3	+	185582498	p5@SENP2	ENST00000430355.1	intronic	hsa-novelmir-1446
chr3	-	185542795	chr3	-	185825007	p1@IGF2BP2	ENST00000457616.2	intronic	hsa-mir-548aq
chr3	-	185655770	chr3	-	185937982	p1@TRA2B	ENST00000485530.1	intronic	hsa-novelmir-1447
chr3	-	185826878	chr3	-	186109089	p1@ETV5	ENST00000476890.1	intronic	hsa-novelmir-1448
chr3	+	186501366	chr3	+	186783577	p1@EIF4A2	ENST00000429589.1	intronic	hsa-mir-1248
chr3	+	186648325	chr3	+	186930536	p1@ST6GAL1	ENST00000427315.1	intronic	hsa-novelmir-1450
chr3	+	187871719	chr3	+	188153931	p1@LPP	NM_001167672	intronic	hsa-mir-28,hsa-novelmir-1451
chr3	+	189507449	chr3	+	189789660	p1@TP63	NM_001114980	intronic	hsa-mir-944
chr3	-	189838686	chr3	-	190120897	p1@LEPREL1	ENST00000319332.5	intronic	hsa-novelmir-1453
chr3	+	191047210	chr3	+	191329421	p1@CCDC50	NM_178335	intronic	hsa-novelmir-1456
chr3	-	194991888	chr3	-	195271159	p1@XXYLT1	NM_152531	intronic	hsa-mir-3137
chr3	+	195424614	chr3	+	195697743	p@chr3:195424584..195424631,+	ENST00000451228.1	intergenic	hsa-mir-570
chr3	-	195619596	chr3	-	195892725	p2@TNK2	ENST00000428187.1	intronic	hsa-novelmir-1462
chr3	-	195636634	chr3	-	195909763	p@chr3:195636582..195636650,-	ENST00000468819.1	intronic	hsa-mir-6829
chr3	-	195638796	chr3	-	195911925	p20@TNK2	ENST00000468819.1	intronic	hsa-novelmir-1464
chr3	-	195808961	chr3	-	196082090	p1@TFRC	NM_003234	intronic	hsa-novelmir-1466,hsa-novelmir-1465
chr3	-	197025483	chr3	-	197298612	p1@DLG1	ENST00000419553.1	intronic	hsa-mir-4797
chr3	-	197463773	chr3	-	197736902	p1@KIAA0226	NM_014687	intronic	hsa-mir-922
chr3	+	197687104	chr3	+	197960233	p1@LMLN	ENST00000420910.2	intronic	hsa-novelmir-1472
chr3	+	197880115	chr3	+	198153244	p@chr3:197880110..197880126,+	ENST00000437428.2	intergenic	hsa-novelmir-1473
chr4	+	53215	chr4	+	53321	p1@ZNF595,p1@ZNF718	ENST00000526473.2	intronic	hsa-novelmir-1474
chr4	+	331603	chr4	+	337814	p1@ZNF141	ENST00000366506.4	intronic	hsa-mir-571
chr4	-	467939	chr4	-	474150	p1@ABCA11P,p1@ZNF721	ENST00000506646.1	intronic	hsa-novelmir-1475
chr4	-	492945	chr4	-	499156	p2@ZNF721	ENST00000511833.2	intronic	hsa-novelmir-1476
chr4	+	668331	chr4	+	674542	p1@MYL5	ENST00000511290.1	intronic	hsa-novelmir-1478
chr4	-	682940	chr4	-	689151	p2@MFSD7	ENST00000404286.2	intronic	hsa-novelmir-1481
chr4	+	699626	chr4	+	705837	p1@PCGF3	ENST00000430644.1	intronic	hsa-novelmir-1482,hsa-novelmir-1483,hsa-novelmir-1484
chr4	-	775637	chr4	-	781849	p1@LOC100129917	ENST00000503571.1	intergenic	hsa-novelmir-1485
chr4	-	926104	chr4	-	932316	p1@GAK	ENST00000507580.1	intronic	hsa-novelmir-1486
chr4	-	1166371	chr4	-	1172583	p1@SPON2	NM_012445	intronic	hsa-novelmir-1487
chr4	-	1242918	chr4	-	1249130	p1@CTBP1	ENST00000290921.6	intronic	hsa-novelmir-1489,hsa-novelmir-1488
chr4	+	1243257	chr4	+	1249469	p1@C4orf42	ENST00000578730.1	intergenic	hsa-novelmir-1490,hsa-novelmir-1491
chr4	+	1723249	chr4	+	1721522	p1@TACC3	ENST00000313288.4	intronic	hsa-novelmir-1493,hsa-novelmir-1494
chr4	-	2010699	chr4	-	2008972	p1@WHSC2	ENST00000411638.2	intronic	hsa-mir-943
chr4	-	2263836	chr4	-	2262109	p1@MXD4	NM_006454	intronic	hsa-mir-4800
chr4	-	2420372	chr4	-	2418645	p1@ZFYVE28	NM_001172656	intronic	hsa-novelmir-1496
chr4	-	2965133	chr4	-	2963406	p1@NOP14	NM_003703	intronic	hsa-novelmir-1498
chr4	+	3465038	chr4	+	3463311	p1@DOK7	ENST00000507039.1	intronic	hsa-novelmir-1499,hsa-novelmir-1500
chr4	-	3534149	chr4	-	3532422	p1@LRPAP1	ENST00000515119.1	intronic	hsa-novelmir-1501
chr4	+	4543868	chr4	+	4542141	p1@ENST00000507244	NR_037888	intergenic	hsa-novelmir-1504,hsa-novelmir-1505
chr4	+	4861392	chr4	+	4859665	p1@MSX1	NM_002448	intronic	hsa-novelmir-1506
chr4	+	6784459	chr4	+	6782732	p1@KIAA0232	NM_014743	intronic	hsa-novelmir-1508
chr4	+	7194295	chr4	+	7192568	p1@SORCS2	ENST00000507866.2	intronic	hsa-mir-4798,hsa-mir-4274,hsa-novelmir-1510,hsa-novelmir-1511,hsa-novelmir-1512
chr4	-	7941584	chr4	-	7939857	p1@AFAP1	NM_198595	intronic	hsa-novelmir-1513
chr4	-	8160540	chr4	-	8158813	p1@ABLIM2	ENST00000361737.5	intronic	hsa-novelmir-1514,hsa-mir-95
chr4	+	8475034	chr4	+	8473307	p2@METTL19	ENST00000511366.2	intronic	hsa-novelmir-1516
chr4	-	10118384	chr4	-	10116760	p1@WDR1	ENST00000502702.1	intronic	hsa-mir-3138
chr4	+	13629483	chr4	+	13627859	p@chr4:13629446..13629494,+	NR_049814	intergenic	hsa-mir-5091
chr4	+	15704688	chr4	+	15703065	p1@BST1	ENST00000382346.3	intronic	hsa-novelmir-1523
chr4	+	16228286	chr4	+	16226663	p1@FLJ39653	NR_027697	intergenic	hsa-novelmir-1525
chr4	-	16900257	chr4	-	16898634	p1@LDB2	ENST00000502640.1	intronic	hsa-novelmir-1527
chr4	-	17513713	chr4	-	17512090	p1@QDPR	ENST00000513615.1	intronic	hsa-novelmir-1528
chr4	+	20253528	chr4	+	20251905	p@chr4:20253519..20253549,+	XM_005248211.2	intronic	hsa-mir-218-1
chr4	-	21950393	chr4	-	21948770	p1@KCNIP4	NM_147181	intronic	hsa-mir-7978
chr4	-	24531390	chr4	-	24529767	p5@DHX15	ENST00000510645.1	intronic	hsa-mir-573
chr4	-	24914654	chr4	-	24913032	p1@CCDC149	NM_001130726	intronic	hsa-novelmir-1533
chr4	+	26322636	chr4	+	26321014	p1@RBPJ	ENST00000511401.1	intronic	hsa-novelmir-1536
chr4	+	37979033	chr4	+	37977412	p1@TBC1D1	ENST00000446803.2	intronic	hsa-novelmir-1540
chr4	+	38869427	chr4	+	38867806	p1@FAM114A1	ENST00000358869.2	intronic	hsa-mir-574,hsa-novelmir-1541
chr4	+	39184149	chr4	+	39182529	p1@WDR19	ENST00000506869.1	intronic	hsa-novelmir-1542
chr4	-	39367982	chr4	-	39366362	p1@RFC1	ENST00000349703.2	intronic	hsa-novelmir-1543
chr4	+	39408550	chr4	+	39406930	p1@KLB	NM_175737	intronic	hsa-mir-5591
chr4	-	40632865	chr4	-	40630848	p1@RBM47	ENST00000505414.1	intronic	hsa-novelmir-1547,hsa-mir-4802
chr4	-	41216506	chr4	-	41214489	p1@APBB2	ENST00000513140.1	intronic	hsa-novelmir-1548
chr4	+	41258945	chr4	+	41256928	p1@UCHL1	ENST00000505232.1	intronic	hsa-novelmir-1549
chr4	+	41362824	chr4	+	41360807	p1@LIMCH1	ENST00000512228.1	intronic	hsa-novelmir-1550
chr4	-	42375902	chr4	-	42373885	p@chr4:42375900..42375903,-	ENST00000503321.1	intergenic	hsa-novelmir-1551
chr4	-	48271835	chr4	-	48269818	p1@TEC	NM_003215	intronic	hsa-novelmir-1554
chr4	-	48908791	chr4	-	48906774	p1@OCIAD2	ENST00000506226.2	intronic	hsa-novelmir-1556
chr4	+	53578671	chr4	+	52712504	p1@SNHG13	ENST00000441504.1	intergenic	hsa-mir-4449
chr4	+	53728484	chr4	+	52862317	p1@RASL11B	NM_023940	intronic	hsa-novelmir-1559
chr4	-	56412987	chr4	-	55546820	p1@CLOCK	ENST00000506923.1	intronic	hsa-novelmir-1561
chr4	-	57301778	chr4	-	56435612	p1@PPAT	ENST00000264220.2	intronic	hsa-novelmir-1562
chr4	+	57845062	chr4	+	56978896	p1@POLR2B	ENST00000433463.1	intronic	hsa-novelmir-1564
chr4	-	57976551	chr4	-	57110385	p1@IGFBP7	NM_001553	intronic	hsa-novelmir-1566,hsa-novelmir-1565
chr4	+	66959810	chr4	+	66094092	p1@ENST00000443143	curation	intergenic	hsa-mir-1269a
chr4	+	68567079	chr4	+	67701361	p1@ENST00000500538,p1@ENST00000506606,p1@ENST00000514109	ENST00000500538.2	intergenic	hsa-novelmir-1570
chr4	-	73935433	chr4	-	73069716	p1@COX18	ENST00000510031.1	intronic	hsa-novelmir-1576
chr4	-	76555707	chr4	-	75630523	p1@CDKL2	ENST00000307465.4	intronic	hsa-novelmir-1577
chr4	-	76598595	chr4	-	75673411	p1@G3BP2	ENST00000357854.3	intronic	hsa-novelmir-1578
chr4	-	76862166	chr4	-	75941013	p1@NAAA	NM_001042402	intronic	hsa-novelmir-1580,hsa-novelmir-1579
chr4	-	76912092	chr4	-	75990939	p1@SDAD1	ENST00000395710.1	intronic	hsa-novelmir-1581
chr4	+	77356382	chr4	+	76435229	p4@SHROOM3	NM_020859	intronic	hsa-mir-548ah,hsa-mir-4450
chr4	-	77997142	chr4	-	77075989	p1@CCNI	ENST00000537948.1	intronic	hsa-novelmir-1587,hsa-novelmir-1585
chr4	+	78978499	chr4	+	78057345	p1@FRAS1	NM_025074	intronic	hsa-novelmir-1589
chr4	+	79697504	chr4	+	78776350	p1@BMP2K	ENST00000389010.3	intronic	hsa-mir-5096
chr4	-	83719925	chr4	-	82798772	p1@SCD5	ENST00000273908.4	intronic	hsa-mir-575
chr4	-	83812295	chr4	-	82891142	p1@SEC31A	ENST00000348405.4	intronic	hsa-novelmir-1591
chr4	+	83956354	chr4	+	83035201	p1@COPS4	ENST00000507376.1	intronic	hsa-novelmir-1592
chr4	+	86396307	chr4	+	85475154	p1@ARHGAP24	NM_001025616	intronic	hsa-mir-4451,hsa-novelmir-1593
chr4	-	87515227	chr4	-	86594074	p4@MAPK10	ENST00000513839.1	intronic	hsa-mir-4452
chr4	+	87856163	chr4	+	86935011	p1@AFF1	ENST00000507468.1	intronic	hsa-novelmir-1595
chr4	+	90602656	chr4	+	89681505	p1@ENST00000513572,p1@uc003hsn.1	ENST00000513572.1	intergenic	hsa-novelmir-1601
chr4	+	93225144	chr4	+	92303993	p1@GRID2	NM_001510	intronic	hsa-novelmir-1604
chr4	+	99916872	chr4	+	98995721	p1@METAP1	ENST00000507537.1	intronic	hsa-mir-3684
chr4	-	102268657	chr4	-	101347500	p1@PPP3CA	ENST00000394854.3	intronic	hsa-mir-8066,hsa-mir-1255a
chr4	-	103682106	chr4	-	102760949	p1@MANBA	ENST00000514430.1	intronic	hsa-novelmir-1607
chr4	-	103748708	chr4	-	102827551	p1@UBE2D3	NM_181891	intronic	hsa-novelmir-1608
chr4	+	104235413	chr4	+	103314256	p@chr4:104235412..104235413,+	ENST00000513793.1	intergenic	hsa-novelmir-1610
chr4	-	105808129	chr4	-	104886972	p1@ENST00000474399	ENST00000515127.1	intergenic	hsa-novelmir-1611
chr4	-	110223813	chr4	-	109302657	p1@COL25A1	NM_198721	intronic	hsa-novelmir-1615
chr4	+	110354982	chr4	+	109433826	p1@SEC24B	NM_006323	intronic	hsa-mir-576
chr4	+	110736681	chr4	+	109815525	p1@GAR1	NM_018983	intronic	hsa-novelmir-1617
chr4	-	111536724	chr4	-	110615568	p1@ENST00000513690	ENST00000513690.1	intergenic	hsa-novelmir-1618
chr4	+	113152943	chr4	+	112231787	p1@AP1AR	ENST00000502954.1	intronic	hsa-novelmir-1620
chr4	+	113206328	chr4	+	112285172	p3@ALPK1	ENST00000514594.1	intronic	hsa-novelmir-1621
chr4	+	113218557	chr4	+	112297401	p1@ALPK1	ENST00000515106.1	intronic	hsa-novelmir-1622
chr4	+	113558327	chr4	+	112637171	p1@LARP7	ENST00000513553.1	intronic	hsa-novelmir-1624
chr4	-	113569855	chr4	-	112648699	p1@ENST00000505215,p1@ENST00000509938	ENST00000509938.1	intergenic	hsa-novelmir-1623,hsa-mir-302b,hsa-mir-302c,hsa-mir-302a,hsa-mir-302d,hsa-mir-367
chr4	-	113627982	chr4	-	112706826	p2@ENST00000505632	ENST00000505632.1	intergenic	hsa-novelmir-1625
chr4	+	113739307	chr4	+	112818151	p1@ANK2	ENST00000503271.1	intronic	hsa-mir-1243,hsa-mir-8082,hsa-novelmir-1626
chr4	-	114682890	chr4	-	113761734	p1@CAMK2D	ENST00000394522.3	intronic	hsa-novelmir-1627
chr4	+	115519963	chr4	+	114598807	p1@UGT8	NM_001128174	intronic	hsa-mir-577
chr4	+	117220512	chr4	+	116299356	p1@MIR1973	ENST00000604093.1	intronic	hsa-mir-1973
chr4	+	119414391	chr4	+	118493236	p@chr4:119414389..119414391,+	ENST00000502249.2	intergenic	hsa-novelmir-1631
chr4	+	119948514	chr4	+	119027359	p1@SYNPO2	ENST00000504178.1	intronic	hsa-novelmir-1632
chr4	-	120331553	chr4	-	119410398	p1@uc003idc.2	NR_037596	intergenic	hsa-novelmir-1633
chr4	+	129730855	chr4	+	128809700	p1@PHF17	NM_199320	intronic	hsa-novelmir-1640,hsa-novelmir-1641
chr4	+	134070449	chr4	+	133149294	p1@PCDH10	NM_032961	intronic	hsa-novelmir-1643,hsa-novelmir-1644
chr4	-	140216969	chr4	-	139295815	p1@NDUFC1	ENST00000503997.1	intronic	hsa-novelmir-1647
chr4	+	141445322	chr4	+	140524168	p1@ELMOD2	NM_153702	intronic	hsa-novelmir-1648
chr4	+	142557790	chr4	+	141636637	p1@IL15	ENST00000296545.7	intronic	hsa-novelmir-1649
chr4	-	143326578	chr4	-	142405425	p1@INPP4B	ENST00000507462.1	intronic	hsa-novelmir-1650
chr4	-	143395561	chr4	-	142474408	p3@INPP4B	ENST00000507861.1	intronic	hsa-novelmir-1651
chr4	+	144258032	chr4	+	143336879	p1@GAB1	ENST00000262994.4	intronic	hsa-mir-3139
chr4	-	146019348	chr4	-	145098196	p1@ANAPC10	ENST00000502562.1	intronic	hsa-novelmir-1652
chr4	-	147443064	chr4	-	146521912	p1@SLC10A7	ENST00000335472.7	intronic	hsa-novelmir-1654
chr4	+	148653239	chr4	+	147732088	p1@ARHGAP10	ENST00000336498.3	intronic	hsa-mir-4799,hsa-novelmir-1656
chr4	-	151936879	chr4	-	151015727	p1@LRBA	ENST00000535741.1	intronic	hsa-novelmir-1657
chr4	+	152330328	chr4	+	151409176	p1@FAM160A1	ENST00000508198.1	intronic	hsa-novelmir-1659
chr4	-	152682159	chr4	-	151761007	p1@PET112	ENST00000515812.1	intronic	hsa-novelmir-1661
chr4	-	153457215	chr4	-	152536063	p@chr4:153457197..153457268,-	ENST00000281708.4	intronic	hsa-mir-3140
chr4	+	153457530	chr4	+	152536378	p1@MIR4453	NR_033797	intergenic	hsa-mir-4453
chr4	+	153701112	chr4	+	152779960	p1@ARFIP1	NM_001025595	intronic	hsa-novelmir-1663
chr4	+	154073486	chr4	+	153152334	p3@TRIM2	ENST00000441616.1	intronic	hsa-novelmir-1664
chr4	+	160025203	chr4	+	159104051	p1@RAPGEF2	ENST00000505478.1	intronic	hsa-mir-3688-2
chr4	-	164534684	chr4	-	163613532	p1@MARCH1	ENST00000505517.1	intronic	hsa-novelmir-1671
chr4	+	166300212	chr4	+	165379060	p1@CPE	NM_001873	intronic	hsa-mir-578
chr4	+	169753246	chr4	+	168832095	p1@PALLD	ENST00000507735.1	intronic	hsa-novelmir-1673
chr4	-	170533734	chr4	-	169612583	p1@NEK1	ENST00000510533.1	intronic	hsa-novelmir-1675
chr4	+	174089962	chr4	+	173168811	p1@GALNT7	ENST00000512285.1	intronic	hsa-mir-548t
chr4	+	183065844	chr4	+	182144691	p2@ODZ3	ENST00000512480.1	intronic	hsa-mir-1305
chr4	+	183164555	chr4	+	182243402	p4@ODZ3	ENST00000511685.1	intronic	hsa-novelmir-1687
chr4	+	184020432	chr4	+	183099279	p1@WWC2	ENST00000403733.3	intronic	hsa-novelmir-1688
chr4	-	185570601	chr4	-	184649447	p1@CASP3	ENST00000517513.1	intronic	hsa-novelmir-1691
chr4	-	185776807	chr4	-	184855653	p1@ENST00000510284,p1@uc003iwy.1	ENST00000510284.1	intergenic	hsa-mir-3945
chr4	+	187112725	chr4	+	186191571	p1@CYP4V2	NM_207352	intronic	hsa-novelmir-1692
chr4	-	187647819	chr4	-	186726665	p1@FAT1	ENST00000509647.1	intronic	hsa-novelmir-1693
chr4	-	190861819	chr4	-	189940664	p1@ENST00000506276	ENST00000506276.1	intergenic	hsa-novelmir-1695
chr5	+	271761	chr5	+	271646	p1@PDCD6	ENST00000506909.1	intronic	hsa-novelmir-1696,hsa-novelmir-1697
chr5	+	321859	chr5	+	321744	p1@AHRR	ENST00000514523.1	intronic	hsa-novelmir-1698,hsa-novelmir-1699
chr5	+	666148	chr5	+	666033	p@chr5:666131..666160,+	XM_001715368	intergenic	hsa-novelmir-1700
chr5	-	850695	chr5	-	850580	p1@ZDHHC11	ENST00000424784.2	intronic	hsa-novelmir-1701
chr5	-	892916	chr5	-	892801	p1@BRD9	ENST00000495265.1	intronic	hsa-novelmir-1702
chr5	-	1112178	chr5	-	1112063	p2@SLC12A7	NM_006598	intronic	hsa-novelmir-1705,hsa-mir-4635
chr5	-	1295167	chr5	-	1295052	p1@TERT	NM_001193376	intronic	hsa-novelmir-1706
chr5	-	1316477	chr5	-	1316362	p@chr5:1316464..1316478,-	curation	intergenic	hsa-mir-4457
chr5	-	1524074	chr5	-	1523959	p1@LPCAT1	NM_024830	intronic	hsa-novelmir-1708,hsa-novelmir-1707,hsa-mir-6075
chr5	+	1801521	chr5	+	1801407	p1@NDUFS6	ENST00000274137.5	intronic	hsa-novelmir-1709
chr5	+	5146305	chr5	+	5146192	p1@ADAMTS16	ENST00000433402.2	intronic	hsa-novelmir-1713
chr5	+	5422790	chr5	+	5422677	p1@KIAA0947	NM_015325	intronic	hsa-novelmir-1714
chr5	+	6722683	chr5	+	6722570	p@chr5:6722680..6722684,+	NM_006999	intronic	hsa-novelmir-1716,hsa-novelmir-1717
chr5	+	7396289	chr5	+	7396176	p1@ADCY2	ENST00000338316.4	intronic	hsa-novelmir-1718
chr5	+	8457804	chr5	+	8457691	p1@LOC100505738	ENST00000606459.1	intergenic	hsa-mir-4458
chr5	-	9546187	chr5	-	9546075	p1@SEMA5A	ENST00000382496.5	intronic	hsa-mir-4636
chr5	-	10250000	chr5	-	10249888	p1@FAM173B	ENST00000511437.1	intronic	hsa-novelmir-1720
chr5	-	11385049	chr5	-	11384937	p1@CTNND2	ENST00000495388.2	intronic	hsa-novelmir-1721
chr5	+	14143451	chr5	+	14143342	p1@TRIO	ENST00000344204.4	intronic	hsa-novelmir-1724,hsa-novelmir-1725,hsa-novelmir-1727
chr5	-	14871887	chr5	-	14871778	p1@ANKH	NM_054027	intronic	hsa-mir-4637
chr5	+	15500289	chr5	+	15500180	p1@FBXL7	NM_012304	intronic	hsa-mir-887
chr5	-	16180913	chr5	-	16180804	p3@MARCH11	ENST00000505509.1	intronic	hsa-novelmir-1729
chr5	-	16936374	chr5	-	16936265	p1@MYO10	ENST00000513610.1	intronic	hsa-novelmir-1730
chr5	-	17217128	chr5	-	17217019	p1@ENST00000399760	ENST00000399760.2	intergenic	hsa-novelmir-1731
chr5	-	19988309	chr5	-	19988200	p1@CDH18	ENST00000511273.1	intronic	hsa-novelmir-1735,hsa-novelmir-1734
chr5	-	20575972	chr5	-	20575863	p3@CDH18	ENST00000507632.2	intronic	hsa-novelmir-1737
chr5	-	25191119	chr5	-	25191010	p1@ENST00000507600	ENST00000507600.1	intergenic	hsa-novelmir-1742
chr5	-	31532181	chr5	-	31532074	p1@DROSHA	ENST00000511367.2	intronic	hsa-novelmir-1744
chr5	-	32444791	chr5	-	32444685	p1@ZFR	NM_016107	intronic	hsa-mir-579
chr5	-	34048589	chr5	-	34048484	p@chr5:34048580..34048597,-	ENST00000382079.3	intronic	hsa-novelmir-1747
chr5	-	34244921	chr5	-	34244816	p1@ENST00000508395	ENST00000508395.1	intergenic	hsa-novelmir-1749
chr5	+	34656507	chr5	+	34656402	p1@RAI14	ENST00000510319.1	intronic	hsa-novelmir-1752,hsa-novelmir-1753
chr5	-	35230577	chr5	-	35230475	p1@PRLR	ENST00000515839.1	intronic	hsa-novelmir-1754
chr5	-	36151989	chr5	-	36151887	p1@LMBRD2	NM_001007527	intronic	hsa-mir-580
chr5	-	36241995	chr5	-	36241893	p1@NADKD1	ENST00000511088.1	intronic	hsa-novelmir-1755
chr5	-	37371192	chr5	-	37371090	p1@NUP155	NM_153485	intronic	hsa-novelmir-1759
chr5	+	38258661	chr5	+	38258559	p2@EGFLAM	NM_001205301	intronic	hsa-novelmir-1761
chr5	-	38595507	chr5	-	38595405	p2@LIFR	ENST00000263409.4	intronic	hsa-mir-3650
chr5	-	38845864	chr5	-	38845762	p1@ENST00000513480,p1@uc003jlk.1	ENST00000513480.1	intergenic	hsa-novelmir-1762
chr5	-	40835324	chr5	-	40835222	p1@RPL37	NM_000997	intronic	hsa-novelmir-1764
chr5	+	41925407	chr5	+	41925305	p1@FBXO4	ENST00000509134.1	intronic	hsa-novelmir-1765
chr5	+	43603288	chr5	+	43603186	p1@NNT	ENST00000512996.2	intronic	hsa-novelmir-1766
chr5	-	44808831	chr5	-	44808729	p1@ENST00000503179,p1@ENST00000503452,p1@ENST00000505302,p1@ENST00000505401,p1@ENST00000505637,p1@ENST00000508945,p1@ENST00000514597	ENST00000505401.1	intergenic	hsa-novelmir-1767
chr5	-	49737089	chr5	-	50441255	p1@EMB	ENST00000508934.1	intronic	hsa-novelmir-1769
chr5	-	53606403	chr5	-	54310573	p1@ARL15	NM_019087	intronic	hsa-mir-4459,hsa-mir-581
chr5	+	53813589	chr5	+	54517759	p1@SNX18	NM_001145427	intronic	hsa-novelmir-1770
chr5	-	54472346	chr5	-	55176518	p@chr5:54472341..54472349,-	curation	intronic	hsa-mir-449c,hsa-mir-449b,hsa-mir-449a
chr5	+	54603829	chr5	+	55308001	p1@SKIV2L2	ENST00000504388.1	intronic	hsa-novelmir-1773
chr5	-	54830792	chr5	-	55534964	p1@PPAP2A	ENST00000515132.1	intronic	hsa-mir-5687
chr5	-	55777613	chr5	-	56481786	p1@ENST00000506836	ENST00000506836.1	intronic	hsa-novelmir-1774
chr5	+	56111376	chr5	+	56815549	p1@MAP3K1	ENST00000399503.3	intronic	hsa-novelmir-1776
chr5	-	59064471	chr5	-	59768645	p1@PDE4D	ENST00000507116.1	intronic	hsa-novelmir-1780,hsa-novelmir-1779,hsa-mir-582
chr5	-	59783890	chr5	-	60488063	p6@PDE4D	ENST00000502484.2	intronic	hsa-novelmir-1781
chr5	+	59784005	chr5	+	60488178	p1@PART1	ENST00000504876.2	intergenic	hsa-novelmir-1782
chr5	-	59995961	chr5	-	60700134	p1@DEPDC1B	ENST00000453022.2	intronic	hsa-novelmir-1783
chr5	+	60628085	chr5	+	61332258	p1@ZSWIM6	NM_020928	intronic	hsa-novelmir-1784
chr5	-	64064490	chr5	-	64768663	p1@SREK1IP1	NM_173829	intronic	hsa-novelmir-1788
chr5	+	65222518	chr5	+	65926690	p1@ERBB2IP	ENST00000511297.1	intronic	hsa-novelmir-1789
chr5	+	66300483	chr5	+	67004655	p1@MAST4	ENST00000436277.1	intronic	hsa-novelmir-1790
chr5	+	66675206	chr5	+	67379378	p1@ENST00000503106	ENST00000503106.1	intergenic	hsa-novelmir-1791,hsa-novelmir-1792
chr5	-	68256480	chr5	-	68960653	p@chr5:68256471..68256484,-	ENST00000503268.1	intergenic	hsa-novelmir-1795
chr5	+	70751480	chr5	+	71455653	p1@BDP1	ENST00000508917.2	intronic	hsa-novelmir-1797
chr5	+	70883167	chr5	+	71587340	p1@MCCC2	ENST00000509358.2	intronic	hsa-novelmir-1798
chr5	+	71403304	chr5	+	72107477	p1@MAP1B	ENST00000513526.2	intronic	hsa-mir-4803
chr5	-	71616066	chr5	-	72320239	p1@MRPS27	ENST00000457646.4	intronic	hsa-novelmir-1800
chr5	+	72143966	chr5	+	72848139	p1@TNPO1	NM_153188	intronic	hsa-mir-4804
chr5	-	74062939	chr5	-	74767114	p1@GFM2	ENST00000345239.2	intronic	hsa-novelmir-1803
chr5	-	76383032	chr5	-	77087207	p1@ZBED3	NM_032367	intronic	hsa-novelmir-1810
chr5	-	77590516	chr5	-	78294692	p1@AP3B1	ENST00000519295.1	intronic	hsa-novelmir-1811
chr5	-	77944595	chr5	-	78648772	p1@LHFPL2	NM_005779	intronic	hsa-novelmir-1813
chr5	-	79551865	chr5	-	80256046	p1@SERINC5	ENST00000509193.1	intronic	hsa-novelmir-1817,hsa-novelmir-1816
chr5	+	79703883	chr5	+	80408064	p1@ZFYVE16	ENST00000512558.1	intronic	hsa-novelmir-1818,hsa-novelmir-1820
chr5	-	80597337	chr5	-	81301518	p1@ENST00000512287	ENST00000512287.1	intergenic	hsa-novelmir-1821
chr5	+	82767413	chr5	+	83471594	p3@VCAN	ENST00000503923.1	intronic	hsa-novelmir-1824
chr5	+	85913758	chr5	+	86617941	p1@COX7C	ENST00000505430.1	intronic	hsa-mir-3607,hsa-novelmir-1828
chr5	+	86563700	chr5	+	87267883	p1@RASA1	ENST00000274376.6	intronic	hsa-novelmir-1830
chr5	+	87564841	chr5	+	88269024	p1@LOC100505894	NR_039994	intergenic	hsa-novelmir-1831
chr5	-	87969143	chr5	-	88673325	p1@LINC00461	ENST00000505030.1	intergenic	hsa-mir-9-2
chr5	+	89854617	chr5	+	90558800	p1@GPR98	NM_032119	intronic	hsa-novelmir-1832
chr5	+	91562293	chr5	+	92266476	p@chr5:91562292..91562293,+	ENST00000502934.1	intergenic	hsa-novelmir-1833
chr5	-	93447340	chr5	-	94111635	p1@FAM172A	ENST00000395965.3	intronic	hsa-mir-2277
chr5	-	93954309	chr5	-	94618604	p1@KIAA0825	NM_001145678	intronic	hsa-novelmir-1835,hsa-novelmir-1834
chr5	-	94417349	chr5	-	95081645	p1@MCTP1	ENST00000429576.2	intronic	hsa-novelmir-1836
chr5	+	95067040	chr5	+	95731336	p1@RHOBTB3	ENST00000379982.3	intronic	hsa-novelmir-1837
chr5	+	95297705	chr5	+	95962001	p1@ENST00000502645,p1@ENST00000511775	ENST00000502645.2	intergenic	hsa-mir-583,hsa-novelmir-1838
chr5	-	96143648	chr5	-	96807945	p1@ERAP1	ENST00000443439.2	intronic	hsa-novelmir-1840
chr5	+	96437436	chr5	+	97101732	p@chr5:96437435..96437470,+	ENST00000509481.1	intronic	hsa-novelmir-1841
chr5	-	97463833	chr5	-	98128129	p@chr5:97463822..97463835,-	ENST00000505908.1	intergenic	hsa-novelmir-1842
chr5	+	98264875	chr5	+	98929171	p1@ENST00000513175	ENST00000513175.1	intergenic	hsa-novelmir-1845
chr5	-	100238967	chr5	-	100903263	p1@ST8SIA4	ENST00000231461.5	intronic	hsa-mir-548p
chr5	-	107006606	chr5	-	107670905	p2@EFNA5	NM_001962	intronic	hsa-novelmir-1849
chr5	+	109025629	chr5	+	109689928	p1@MAN2A1	NM_002372	intronic	hsa-novelmir-1852
chr5	-	110062372	chr5	-	110726671	p2@TMEM232	ENST00000515518.2	intronic	hsa-mir-548f-3
chr5	+	110428046	chr5	+	111092348	p1@WDR36	NM_139281	intronic	hsa-novelmir-1853
chr5	+	112073585	chr5	+	112737888	p1@APC	ENST00000257430.4	intronic	hsa-novelmir-1855
chr5	-	118324229	chr5	-	118988534	p1@DTWD2	ENST00000515439.3	intronic	hsa-novelmir-1859
chr5	+	118407094	chr5	+	119071399	p1@DMXL1	NM_005509	intronic	hsa-mir-5706
chr5	+	118604460	chr5	+	119268765	p1@TNFAIP8	ENST00000388882.5	intronic	hsa-novelmir-1860
chr5	+	121297677	chr5	+	121961982	p1@SRFBP1	NM_152546	intronic	hsa-novelmir-1861
chr5	+	122424936	chr5	+	123089241	p1@PRDM6	NM_001136239	intronic	hsa-novelmir-1862
chr5	-	125801171	chr5	-	126465479	p@chr5:125801166..125801184,-	ENST00000515808.1	intergenic	hsa-novelmir-1864
chr5	+	126984775	chr5	+	127649083	p1@CTXN3	ENST00000379445.3	intronic	hsa-novelmir-1865
chr5	+	127419458	chr5	+	128083766	p1@SLC12A2	ENST00000262461.2	intronic	hsa-novelmir-1866
chr5	+	128430444	chr5	+	129094751	p1@ISOC1	ENST00000514194.1	intronic	hsa-mir-4633,hsa-novelmir-1867
chr5	+	129240208	chr5	+	129904515	p1@CHSY3	ENST00000305031.4	intronic	hsa-novelmir-1869
chr5	-	131132710	chr5	-	131797017	p1@FNIP1	ENST00000514667.1	intronic	hsa-novelmir-1871
chr5	-	131563544	chr5	-	132227851	p1@P4HA2	ENST00000166534.4	intronic	hsa-mir-6830
chr5	-	131705298	chr5	-	132369606	p1@ENST00000457998	NR_037898	intergenic	hsa-mir-3936
chr5	+	131993865	chr5	+	132658173	p1@IL13	NM_002188	intronic	hsa-novelmir-1872
chr5	-	132166339	chr5	-	132830647	p1@SHROOM1	ENST00000440118.1	intronic	hsa-novelmir-1873
chr5	+	132387726	chr5	+	133052034	p1@HSPA4	NM_002154	intronic	hsa-novelmir-1874
chr5	-	132948203	chr5	-	133612512	p1@FSTL4	NM_015082	intronic	hsa-mir-1289-2
chr5	-	133304316	chr5	-	133968625	p1@C5orf15	NM_020199	intronic	hsa-novelmir-1876
chr5	-	133340430	chr5	-	134004739	p1@VDAC1	ENST00000395044.3	intronic	hsa-novelmir-1877
chr5	-	133341048	chr5	-	134005357	p4@VDAC1	NM_003374	intronic	hsa-novelmir-1878
chr5	+	133861360	chr5	+	134525670	p1@PHF15	ENST00000361895.2	intronic	hsa-novelmir-1879
chr5	+	134260243	chr5	+	134924553	p1@MTND6P4	ENST00000504352.1	intronic	hsa-mir-4461,hsa-novelmir-1880
chr5	-	136835015	chr5	-	137499326	p1@SPOCK1	NM_004598	intronic	hsa-novelmir-1883
chr5	-	137071778	chr5	-	137736089	p1@KLHL3	NM_017415	intronic	hsa-mir-874
chr5	-	138780140	chr5	-	139444451	p3@DNAJC18	ENST00000512473.1	intronic	hsa-novelmir-1887
chr5	+	139027943	chr5	+	139648358	p1@CXXC5	ENST00000302517.3	intronic	hsa-novelmir-1889
chr5	+	139076603	chr5	+	139697018	p@chr5:139076598..139076603,+	ENST00000515296.1	intergenic	hsa-novelmir-1890
chr5	+	139781418	chr5	+	140401833	p1@ANKHD1-EIF4EBP3,p1@ANKHD1	ENST00000297183.6	intronic	hsa-novelmir-1892
chr5	-	139937041	chr5	-	140557456	p1@SRA1	NM_001253764	intronic	hsa-novelmir-1893
chr5	-	139943929	chr5	-	140564344	p1@APBB3	ENST00000509914.1	intronic	hsa-mir-6831
chr5	+	140027414	chr5	+	140647829	p1@IK,p1@MIR3655	ENST00000503332.1	intronic	hsa-mir-3655
chr5	-	141061797	chr5	-	141682230	p1@ARAP3	NM_022481	intronic	hsa-novelmir-1897,hsa-novelmir-1896
chr5	-	141257973	chr5	-	141878408	p1@PCDH1	ENST00000503492.1	intronic	hsa-novelmir-1901,hsa-novelmir-1900,hsa-novelmir-1899
chr5	-	141392592	chr5	-	142013027	p1@GNPDA1	ENST00000513454.1	intronic	hsa-novelmir-1902
chr5	-	141704586	chr5	-	142325021	p1@SPRY4	ENST00000344120.4	intronic	hsa-novelmir-1905
chr5	+	141704859	chr5	+	142325294	p1@ENST00000510311,p1@ENST00000515288	ENST00000510311.1	intergenic	hsa-novelmir-1906
chr5	+	142149972	chr5	+	142770407	p1@ARHGAP26	ENST00000378004.3	intronic	hsa-novelmir-1907
chr5	+	142987781	chr5	+	143608216	p@chr5:142987778..142987784,+	ENST00000503323.1	intergenic	hsa-mir-5197,hsa-novelmir-1908
chr5	+	143584954	chr5	+	144205391	p1@KCTD16	ENST00000507359.3	intronic	hsa-novelmir-1909
chr5	-	146889505	chr5	-	147509942	p2@DPYSL3	NM_001197294	intronic	hsa-novelmir-1911
chr5	-	148442625	chr5	-	149063062	p1@SH3TC2	ENST00000511307.1	intronic	hsa-mir-584
chr5	+	148521068	chr5	+	149141505	p1@ABLIM3	ENST00000309868.7	intronic	hsa-novelmir-1912
chr5	+	148786441	chr5	+	149406878	p1@MIR143HG	NR_027180	intergenic	hsa-mir-143,hsa-mir-145,hsa-novelmir-1913
chr5	+	149109873	chr5	+	149730310	p1@PPARGC1B	ENST00000309241.5	intronic	hsa-mir-378a
chr5	-	149324356	chr5	-	149944793	p1@PDE6A	NM_000440	intronic	hsa-novelmir-1914
chr5	-	149466089	chr5	-	150086526	p1@CSF1R	ENST00000504875.1	intronic	hsa-novelmir-1915
chr5	-	149829302	chr5	-	150449739	p1@RPS14	ENST00000401695.3	intronic	hsa-novelmir-1917
chr5	+	149865495	chr5	+	150485932	p1@NDST1	ENST00000522491.1	intronic	hsa-novelmir-1919,hsa-novelmir-1920
chr5	+	150004241	chr5	+	150624679	p1@SYNPO	ENST00000518872.1	intronic	hsa-novelmir-1921
chr5	-	150460567	chr5	-	151081006	p1@TNIP1	ENST00000520931.1	intronic	hsa-novelmir-1923
chr5	-	150537340	chr5	-	151157779	p1@ANXA6	ENST00000521512.1	intronic	hsa-novelmir-1925
chr5	-	150947446	chr5	-	151567885	p@chr5:150947440..150947448,-	NM_001447	intronic	hsa-mir-6499
chr5	-	151150984	chr5	-	151771423	p1@LOC100652758	XM_003403522	intronic	hsa-novelmir-1927
chr5	+	153570295	chr5	+	154190735	p1@GALNT10	NM_198321	intronic	hsa-mir-1294,hsa-novelmir-1929,hsa-novelmir-1930
chr5	-	153825382	chr5	-	154445822	p1@FLJ38109	ENST00000519727.1	intergenic	hsa-novelmir-1931
chr5	-	153857786	chr5	-	154478226	p1@HAND1	NM_004821	intronic	hsa-novelmir-1932
chr5	+	154062295	chr5	+	154682735	p@chr5:154062217..154062315,+	curation	intergenic	hsa-mir-1303
chr5	-	156569875	chr5	-	157142864	p1@HAVCR2	ENST00000524219.1	intronic	hsa-novelmir-1939,hsa-novelmir-1938
chr5	+	156607851	chr5	+	157180840	p1@ITK	ENST00000519402.1	intronic	hsa-novelmir-1941
chr5	+	156693133	chr5	+	157266123	p1@CYFIP2	ENST00000522463.1	intronic	hsa-novelmir-1942
chr5	-	157002783	chr5	-	157575775	p1@ADAM19	ENST00000517951.1	intronic	hsa-novelmir-1943
chr5	-	158526924	chr5	-	159099916	p1@EBF1	NM_024007	intronic	hsa-novelmir-1945
chr5	-	159739561	chr5	-	160312554	p1@CCNJL	ENST00000520748.1	intronic	hsa-novelmir-1946
chr5	+	159895259	chr5	+	160468252	p1@uc003lyl.3	ENST00000517927.1	intergenic	hsa-mir-3142,hsa-mir-146a
chr5	-	162864328	chr5	-	163437322	p1@ENST00000503504	ENST00000503504.1	intergenic	hsa-novelmir-1949
chr5	+	164821103	chr5	+	165394097	p@chr5:164821101..164821105,+	ENST00000522189.1	intergenic	hsa-novelmir-1952
chr5	+	167181934	chr5	+	167754929	p1@ODZ2	ENST00000519204.1	intronic	hsa-novelmir-1953,hsa-novelmir-1954
chr5	+	167718697	chr5	+	168291692	p1@WWC1	ENST00000265293.4	intronic	hsa-novelmir-1955
chr5	-	168006364	chr5	-	168579359	p1@PANK3	ENST00000239231.6	intronic	hsa-mir-103a-1
chr5	-	168728143	chr5	-	169301139	p1@SLIT3	NM_003062	intronic	hsa-novelmir-1956,hsa-mir-585,hsa-mir-218-2
chr5	+	169064279	chr5	+	169637275	p1@DOCK2	ENST00000524185.1	intronic	hsa-mir-378e
chr5	+	169780491	chr5	+	170353487	p3@KCNIP1	ENST00000377360.4	intronic	hsa-novelmir-1958
chr5	+	170289025	chr5	+	170862021	p1@RANBP17	ENST00000522533.1	intronic	hsa-novelmir-1959
chr5	-	170814504	chr5	-	171387500	p@chr5:170814498..170814510,-	curation	intergenic	hsa-mir-3912
chr5	-	171433642	chr5	-	172006638	p1@FBXW11	ENST00000265094.5	intronic	hsa-novelmir-1960
chr5	-	171615200	chr5	-	172188196	p1@STK10	NM_005990	intronic	hsa-novelmir-1962,hsa-novelmir-1961
chr5	-	171881500	chr5	-	172454496	p1@SH3PXD2B	NM_001017995	intronic	hsa-novelmir-1963
chr5	+	172068274	chr5	+	172641271	p1@NEURL1B	NM_001142651	intronic	hsa-mir-5003
chr5	+	172261369	chr5	+	172834366	p1@ERGIC1	ENST00000393784.3	intronic	hsa-novelmir-1965,hsa-novelmir-1966
chr5	+	173315352	chr5	+	173888349	p1@CPEB4	NM_030627	intronic	hsa-novelmir-1973
chr5	+	174178248	chr5	+	174751245	p1@ENST00000502684	ENST00000502684.1	intergenic	hsa-mir-4634
chr5	+	174905572	chr5	+	175478569	p1@SFXN1	ENST00000507823.1	intronic	hsa-novelmir-1976
chr5	+	175792490	chr5	+	176365487	p1@ARL10	NM_173664	intronic	hsa-mir-1271
chr5	-	175843540	chr5	-	176416539	p1@CLTB	ENST00000502877.1	intronic	hsa-novelmir-1978
chr5	-	175964861	chr5	-	176537860	p1@RNF44	ENST00000504434.1	intronic	hsa-novelmir-1979
chr5	-	176057535	chr5	-	176630534	p1@SNCB	ENST00000393693.2	intronic	hsa-mir-4281
chr5	-	176326341	chr5	-	176899340	p1@HK3	NM_002115	intronic	hsa-novelmir-1981
chr5	+	176449697	chr5	+	177022696	p1@ZNF346	NM_012279	intronic	hsa-novelmir-1982
chr5	+	176853684	chr5	+	177426683	p1@GRK6	NM_002082	intronic	hsa-novelmir-1984
chr5	-	176981564	chr5	-	177554563	p1@FAM193B	NM_001190946	intronic	hsa-novelmir-1986
chr5	+	177398421	chr5	+	177971420	p1@ENST00000505831	ENST00000511650.1	intergenic	hsa-novelmir-1987
chr5	+	177540533	chr5	+	178113532	p1@N4BP3	NM_015111	intronic	hsa-novelmir-1988
chr5	-	178772457	chr5	-	179345456	p1@ADAMTS2	NM_014244	intronic	hsa-novelmir-1990
chr5	-	179050671	chr5	-	179623670	p1@HNRNPH1	ENST00000514731.1	intronic	hsa-novelmir-1993
chr5	+	179125983	chr5	+	179698982	p1@CANX	ENST00000514032.1	intronic	hsa-novelmir-1994
chr5	+	179233404	chr5	+	179806404	p2@SQSTM1	ENST00000514093.1	intronic	hsa-novelmir-1996
chr5	-	179233866	chr5	-	179806866	p1@MGAT4B	ENST00000292591.7	intronic	hsa-novelmir-1995,hsa-mir-1229
chr5	-	179334890	chr5	-	179907890	p1@TBC1D9B	ENST00000356834.3	intronic	hsa-novelmir-1997
chr5	-	179498728	chr5	-	180071728	p1@RNF130	ENST00000522208.2	intronic	hsa-novelmir-1998,hsa-mir-340
chr5	-	180618897	chr5	-	181191897	p1@ENST00000513771	ENST00000513771.1	intergenic	hsa-novelmir-2002
chr5	-	180657836	chr5	-	181230836	p1@ENST00000499096,p1@uc003mnb.1	curation	intergenic	hsa-mir-4638
chr6	-	693109	chr6	-	693109	p1@EXOC2	ENST00000230449.4	intronic	hsa-novelmir-2005
chr6	+	2765732	chr6	+	2765498	p1@WRNIP1	NM_020135	intronic	hsa-novelmir-2009
chr6	+	3259233	chr6	+	3258999	p1@PSMG4	ENST00000451246.2	intronic	hsa-novelmir-2017,hsa-novelmir-2018
chr6	-	5260975	chr6	-	5260742	p1@LYRM4	ENST00000468929.1	intronic	hsa-mir-3691
chr6	+	5261759	chr6	+	5261526	p1@FARS2	ENST00000274680.4	intronic	hsa-novelmir-2021
chr6	-	6320895	chr6	-	6320662	p1@F13A1	NM_000129	intronic	hsa-mir-7853
chr6	+	7107976	chr6	+	7107743	p1@RREB1	ENST00000491191.1	intronic	hsa-novelmir-2023
chr6	+	7727113	chr6	+	7726880	p2@BMP6	ENST00000283147.6	intronic	hsa-novelmir-2024
chr6	-	8064622	chr6	-	8064389	p1@MUTED-TXNDC5,p1@MUTED,p2@TXNDC5	ENST00000439343.2	intronic	hsa-novelmir-2025
chr6	+	10434576	chr6	+	10434343	p1@ENST00000366312	ENST00000366312.2	intergenic	hsa-mir-5689
chr6	+	10521584	chr6	+	10521351	p2@GCNT2	ENST00000475577.1	intronic	hsa-novelmir-2027
chr6	+	10695205	chr6	+	10694972	p1@PAK1IP1	NM_017906	intronic	hsa-novelmir-2028
chr6	-	11382539	chr6	-	11382306	p2@NEDD9	ENST00000513989.1	intronic	hsa-novelmir-2030
chr6	+	12958209	chr6	+	12957977	p2@PHACTR1	ENST00000457702.2	intronic	hsa-novelmir-2033
chr6	-	13328769	chr6	-	13328537	p1@TBC1D7	ENST00000421203.2	intronic	hsa-novelmir-2034
chr6	+	15246302	chr6	+	15246071	p1@JARID2	NM_004973	intronic	hsa-novelmir-2039,hsa-novelmir-2040,hsa-novelmir-2041,hsa-novelmir-2042
chr6	+	16129317	chr6	+	16129086	p1@MYLIP	NM_013262	intronic	hsa-mir-4639
chr6	-	16761685	chr6	-	16761454	p1@ATXN1	ENST00000244769.4	intronic	hsa-novelmir-2046,hsa-novelmir-2044,hsa-novelmir-2043
chr6	+	20534712	chr6	+	20534481	p1@CDKAL1	NM_017774	intronic	hsa-novelmir-2050,hsa-novelmir-2051,hsa-novelmir-2052,hsa-novelmir-2053
chr6	+	21666675	chr6	+	21666444	p1@LINC00340	NR_015410	intergenic	hsa-novelmir-2056
chr6	-	24936188	chr6	-	24935960	p1@FAM65B	ENST00000538035.1	intronic	hsa-novelmir-2062
chr6	-	25042432	chr6	-	25042204	p4@FAM65B	ENST00000510784.2	intronic	hsa-novelmir-2064
chr6	+	25963030	chr6	+	25962802	p1@TRIM38	ENST00000357085.3	intronic	hsa-novelmir-2066,hsa-novelmir-2067
chr6	+	26402503	chr6	+	26402275	p1@BTN3A1	ENST00000414912.2	intronic	hsa-novelmir-2071
chr6	+	26597204	chr6	+	26596976	p1@ABT1	ENST00000274849.1	intronic	hsa-novelmir-2072
chr6	+	27218977	chr6	+	27251198	p2@PRSS16	ENST00000488649.1	intronic	hsa-novelmir-2073
chr6	-	28583979	chr6	-	28616202	p7@SCAND3	ENST00000530247.1	intronic	hsa-novelmir-2076
chr6	-	28973389	chr6	-	29005612	p2@ZNF311	ENST00000483450.1	intronic	hsa-novelmir-2078
chr6	+	29691211	chr6	+	29723434	p1@HLA-F	ENST00000440587.2	intronic	hsa-novelmir-2079
chr6	+	30539228	chr6	+	30571451	p1@ABCF1	NM_001025091	intronic	hsa-mir-877
chr6	-	30585020	chr6	-	30617243	p1@PPP1R10	ENST00000376511.2	intronic	hsa-novelmir-2081,hsa-novelmir-2080
chr6	+	30614910	chr6	+	30647133	p1@C6orf136	ENST00000463794.1	intronic	hsa-novelmir-2082
chr6	-	30658761	chr6	-	30690984	p1@NRM	ENST00000462857.1	intronic	hsa-novelmir-2083
chr6	-	30685051	chr6	-	30717274	p1@MDC1	NM_014641	intronic	hsa-novelmir-2084
chr6	-	30710462	chr6	-	30742685	p1@FLOT1	ENST00000456573.2	intronic	hsa-novelmir-2085
chr6	+	30852337	chr6	+	30884560	p1@DDR1	ENST00000482873.2	intronic	hsa-mir-4640,hsa-novelmir-2087
chr6	+	30875984	chr6	+	30908207	p1@GTF2H4	ENST00000477288.1	intronic	hsa-novelmir-2088
chr6	+	31126366	chr6	+	31158589	p1@TCF19	ENST00000376255.4	intronic	hsa-novelmir-2090
chr6	-	31148507	chr6	-	31180730	p2@POU5F1	ENST00000441888.3	intronic	hsa-novelmir-2092,hsa-novelmir-2091
chr6	-	31324956	chr6	-	31357179	p1@HLA-B	ENST00000412585.2	intronic	hsa-mir-6891
chr6	+	31588492	chr6	+	31620715	p1@PRRC2A	ENST00000376007.4	intronic	hsa-mir-6832
chr6	+	31620230	chr6	+	31652453	p1@APOM	ENST00000375920.4	intronic	hsa-novelmir-2094
chr6	-	31649245	chr6	-	31681468	p1@LY6G5C	ENST00000474395.1	intronic	hsa-novelmir-2095
chr6	-	31671088	chr6	-	31703311	p1@ABHD16A	ENST00000482224.1	intronic	hsa-novelmir-2096,hsa-mir-4646
chr6	+	31783320	chr6	+	31815543	p1@HSPA1A,p1@HSPA1B	ENST00000608703.1	intronic	hsa-novelmir-2097,hsa-novelmir-2098
chr6	+	31795515	chr6	+	31827738	p2@HSPA1A,p2@HSPA1B	NM_005346	intronic	hsa-novelmir-2099
chr6	-	31926739	chr6	-	31958962	p1@RDBP	ENST00000481121.1	intronic	hsa-mir-1236
chr6	-	32143858	chr6	-	32176081	p1@AGPAT1	ENST00000412465.2	intronic	hsa-mir-6721
chr6	+	32146213	chr6	+	32178436	p1@RNF5	ENST00000427134.2	intronic	hsa-mir-6833,hsa-novelmir-2100
chr6	+	32936380	chr6	+	32968603	p3@BRD2	NM_005104	intronic	hsa-novelmir-2103
chr6	-	32936873	chr6	-	32969096	p5@HLA-DMA	ENST00000422832.1	intronic	hsa-novelmir-2101
chr6	+	33168667	chr6	+	33200890	p1@SLC39A7	ENST00000374677.3	intronic	hsa-novelmir-2104
chr6	-	33257003	chr6	-	33289226	p1@WDR46	NM_001164267	intronic	hsa-mir-6873
chr6	+	33257378	chr6	+	33289601	p1@PFDN6	ENST00000374607.1	intronic	hsa-mir-6834
chr6	+	33387895	chr6	+	33420118	p1@SYNGAP1	ENST00000418600.2	intronic	hsa-mir-5004
chr6	-	33860527	chr6	-	33892750	p1@ENST00000525746,p1@uc003ogi.1	ENST00000525912.1	intergenic	hsa-novelmir-2108
chr6	+	33860906	chr6	+	33893129	p1@ENST00000526556	ENST00000526556.1	intergenic	hsa-mir-7159
chr6	+	34204682	chr6	+	34236905	p1@HMGA1	ENST00000395004.3	intronic	hsa-mir-6835,hsa-novelmir-2112
chr6	+	35227310	chr6	+	35259533	p2@ZNF76	ENST00000484932.1	intronic	hsa-novelmir-2116
chr6	+	35310335	chr6	+	35342558	p1@PPARD	NM_001171818	intronic	hsa-novelmir-2117
chr6	+	35436178	chr6	+	35468401	p1@RPL10A	NM_007104	intronic	hsa-mir-7111
chr6	-	35464851	chr6	-	35497074	p1@TEAD3	ENST00000338863.7	intronic	hsa-novelmir-2119
chr6	-	35656692	chr6	-	35688915	p1@FKBP5	NM_001145776	intronic	hsa-mir-5690
chr6	-	35688376	chr6	-	35720599	p@chr6:35688368..35688397,-	NM_001145775	intronic	hsa-novelmir-2122
chr6	-	35888872	chr6	-	35921095	p1@SRPK1	ENST00000507909.1	intronic	hsa-novelmir-2123
chr6	+	35995585	chr6	+	36027808	p1@MAPK14	ENST00000468133.1	intronic	hsa-novelmir-2125
chr6	+	36164550	chr6	+	36196773	p1@BRPF3	NM_015695	intronic	hsa-novelmir-2127
chr6	-	36164978	chr6	-	36197201	p1@ENST00000499560,p1@ENST00000526611	ENST00000526611.1	intergenic	hsa-novelmir-2126
chr6	+	36210774	chr6	+	36242997	p1@PNPLA1	NM_001145716	intronic	hsa-novelmir-2128
chr6	-	36515236	chr6	-	36547459	p1@STK38	NM_007271	intronic	hsa-novelmir-2129
chr6	+	37787571	chr6	+	37819795	p1@ZFAND3	ENST00000373391.2	intronic	hsa-novelmir-2132
chr6	+	39016557	chr6	+	39048781	p1@GLP1R	NM_002062	intronic	hsa-novelmir-2135
chr6	-	39197249	chr6	-	39229473	p1@KCNK5	NM_003740	intronic	hsa-novelmir-2137
chr6	-	40555091	chr6	-	40587352	p1@LRFN2	NM_020737	intronic	hsa-novelmir-2138
chr6	+	41040714	chr6	+	41072975	p1@NFYA	NM_002505	intronic	hsa-novelmir-2140
chr6	+	41514136	chr6	+	41546398	p1@FOXP4	NM_001012426	intronic	hsa-mir-4641,hsa-novelmir-2141,hsa-novelmir-2142
chr6	+	41604760	chr6	+	41637022	p1@MDFI	ENST00000373051.2	intronic	hsa-novelmir-2143
chr6	-	41703346	chr6	-	41735608	p1@TFEB	ENST00000373033.1	intronic	hsa-novelmir-2145
chr6	-	42016426	chr6	-	42048688	p2@CCND3	ENST00000508143.1	intronic	hsa-novelmir-2146
chr6	-	42110353	chr6	-	42142615	p1@C6orf132	ENST00000341865.4	intronic	hsa-novelmir-2147
chr6	-	42419561	chr6	-	42451823	p1@TRERF1	NM_033502	intronic	hsa-novelmir-2148
chr6	+	42531767	chr6	+	42564029	p1@UBR2	NM_015255	intronic	hsa-novelmir-2149
chr6	-	43027140	chr6	-	43059402	p1@MRPL2	ENST00000480286.1	intronic	hsa-novelmir-2151
chr6	+	43395282	chr6	+	43427544	p1@ABCC10	NM_001198934	intronic	hsa-mir-6780b
chr6	+	43445308	chr6	+	43477570	p1@TJAP1	ENST00000259751.1	intronic	hsa-novelmir-2153
chr6	-	44225265	chr6	-	44257528	p1@SLC35B2	NM_178148	intronic	hsa-mir-4647
chr6	-	44233285	chr6	-	44265548	p1@NFKBIE	ENST00000477930.2	intronic	hsa-novelmir-2157
chr6	+	44280799	chr6	+	44313062	p@chr6:44280768..44280802,+	ENST00000505802.1	intronic	hsa-novelmir-2158
chr6	+	44355447	chr6	+	44387710	p1@CDC5L	ENST00000371477.3	intronic	hsa-mir-4642
chr6	-	45345671	chr6	-	45377934	p1@SUPT3H	ENST00000371460.1	intronic	hsa-novelmir-2159,hsa-mir-586
chr6	-	46138694	chr6	-	46170957	p1@ENPP5	ENST00000371383.2	intronic	hsa-novelmir-2162
chr6	+	52001072	chr6	+	52136274	p@chr6:52001069..52001073,+	curation	intergenic	hsa-mir-206,hsa-mir-133b
chr6	+	52226949	chr6	+	52362151	p1@PAQR8	NM_133367	intronic	hsa-novelmir-2166,hsa-novelmir-2167
chr6	+	52285140	chr6	+	52420342	p1@EFHC1	ENST00000433625.2	intronic	hsa-novelmir-2168
chr6	-	53213748	chr6	-	53348950	p1@ELOVL5	ENST00000541407.1	intronic	hsa-novelmir-2169
chr6	-	56507687	chr6	-	56642889	p1@DST	NM_015548	intronic	hsa-novelmir-2173,hsa-novelmir-2172
chr6	-	56819571	chr6	-	56954773	p3@DST	ENST00000449297.2	intronic	hsa-novelmir-2175,hsa-novelmir-2174
chr6	+	57182428	chr6	+	57317630	p1@PRIM2	ENST00000389488.2	intronic	hsa-mir-548u
chr6	-	66417087	chr6	-	65707194	p1@EYS	ENST00000370621.3	intronic	hsa-novelmir-2177
chr6	-	72130532	chr6	-	71420829	p1@LINC00472	ENST00000413945.1	intergenic	hsa-mir-30a,hsa-mir-30c-2
chr6	+	73331971	chr6	+	72622243	p1@KCNQ5	ENST00000402622.2	intronic	hsa-novelmir-2180
chr6	+	80816388	chr6	+	80106671	p1@BCKDHB	ENST00000545529.1	intronic	hsa-novelmir-2183
chr6	+	83903076	chr6	+	83193357	p1@RWDD2A	ENST00000369724.4	intronic	hsa-novelmir-2186
chr6	+	86159450	chr6	+	85449732	p3@NT5E	NM_002526	intronic	hsa-novelmir-2189
chr6	+	87865287	chr6	+	87155569	p1@ZNF292	ENST00000369578.2	intronic	hsa-novelmir-2190
chr6	+	89790470	chr6	+	89080751	p1@PNRC1	ENST00000369472.1	intronic	hsa-novelmir-2192
chr6	+	98303957	chr6	+	97856081	p@chr6:98303954..98303963,+	ENST00000607823.1	intergenic	hsa-mir-2113
chr6	-	106773505	chr6	-	106325630	p1@ATG5	ENST00000360666.4	intronic	hsa-novelmir-2202,hsa-novelmir-2201
chr6	-	108145517	chr6	-	107824313	p1@SCML4	ENST00000369020.3	intronic	hsa-novelmir-2204
chr6	+	111804740	chr6	+	111483537	p1@TRAF3IP2-AS1	ENST00000438298.2	intergenic	hsa-novelmir-2208
chr6	-	114664187	chr6	-	114343023	p1@HS3ST5	ENST00000312719.5	intronic	hsa-novelmir-2212,hsa-novelmir-2211
chr6	-	116382052	chr6	-	116060889	p2@FRK	NM_002031	intronic	hsa-novelmir-2214
chr6	-	119399829	chr6	-	119078664	p1@FAM184A	NM_024581	intronic	hsa-mir-548b
chr6	+	120326868	chr6	+	120005722	p@chr6:120326861..120326878,+	curation	intergenic	hsa-mir-3144
chr6	-	121655626	chr6	-	121334480	p1@C6orf170	ENST00000464622.1	intronic	hsa-novelmir-2218
chr6	+	122793066	chr6	+	122471921	p3@PKIB	NM_001270393	intronic	hsa-novelmir-2219
chr6	+	125474955	chr6	+	125153809	p1@TPD52L1	ENST00000527711.1	intronic	hsa-novelmir-2220
chr6	+	126661261	chr6	+	126340115	p1@CENPW	curation	intergenic	hsa-mir-588
chr6	-	127837194	chr6	-	127516049	p1@C6orf174	ENST00000368268.2	intronic	hsa-novelmir-2221
chr6	+	131949585	chr6	+	131628445	p2@ENPP3	ENST00000427707.1	intronic	hsa-novelmir-2223
chr6	+	132223092	chr6	+	131901952	p1@ENST00000454596	ENST00000454596.1	intergenic	hsa-novelmir-2224
chr6	-	132834246	chr6	-	132513107	p1@STX7	ENST00000448348.3	intronic	hsa-novelmir-2225
chr6	+	134273170	chr6	+	133952032	p8@TBPL1	NM_001253676	intronic	hsa-novelmir-2227
chr6	-	135375957	chr6	-	135054819	p1@HBS1L	ENST00000415177.2	intronic	hsa-mir-3662
chr6	+	135818960	chr6	+	135497822	p1@LINC00271	ENST00000580741.1	intergenic	hsa-novelmir-2229
chr6	+	136172839	chr6	+	135851701	p2@PDE7B	NM_018945	intronic	hsa-novelmir-2230
chr6	+	137143730	chr6	+	136822592	p1@PEX7	ENST00000318471.4	intronic	hsa-novelmir-2232,hsa-novelmir-2233
chr6	-	138866872	chr6	-	138545735	p2@NHSL1	ENST00000342260.5	intronic	hsa-mir-3145
chr6	-	143266313	chr6	-	142945176	p1@HIVEP2	NM_006734	intronic	hsa-novelmir-2240
chr6	+	143382039	chr6	+	143060902	p1@AIG1	ENST00000275235.4	intronic	hsa-novelmir-2241,hsa-novelmir-2242,hsa-novelmir-2243
chr6	-	143771832	chr6	-	143450695	p1@ADAT2	NM_182503	intronic	hsa-novelmir-2244
chr6	+	143858018	chr6	+	143536881	p2@PHACTR2	ENST00000367584.4	intronic	hsa-novelmir-2247
chr6	-	147453089	chr6	-	147131953	p1@ENST00000431143,p1@uc003qlv.2	ENST00000447072.1	intergenic	hsa-novelmir-2250
chr6	+	149068191	chr6	+	148747055	p1@UST	NM_005715	intronic	hsa-novelmir-2251
chr6	+	150070879	chr6	+	149749743	p1@PCMT1	ENST00000544496.1	intronic	hsa-novelmir-2256
chr6	+	150184640	chr6	+	149863504	p1@LOC100652739	NR_045126	intergenic	hsa-novelmir-2257
chr6	+	151561545	chr6	+	151240410	p1@AKAP12	ENST00000253332.1	intronic	hsa-novelmir-2258,hsa-novelmir-2259,hsa-novelmir-2261
chr6	+	152128817	chr6	+	151807682	p2@ESR1	NM_000125	intronic	hsa-novelmir-2264,hsa-novelmir-2265,hsa-novelmir-2266
chr6	-	152958019	chr6	-	152636884	p3@SYNE1	NM_033071	intronic	hsa-novelmir-2267
chr6	-	154568788	chr6	-	154247654	p1@IPCEF1	ENST00000519344.1	intronic	hsa-novelmir-2268
chr6	+	155054550	chr6	+	154733416	p1@SCAF8	curation	intronic	hsa-mir-1273c
chr6	+	155154525	chr6	+	154833391	p8@TIAM2	ENST00000461783.3	intronic	hsa-novelmir-2270
chr6	+	157098801	chr6	+	156777667	p1@ARID1B	ENST00000350026.5	intronic	hsa-novelmir-2273,hsa-novelmir-2274
chr6	+	157802231	chr6	+	157381199	p1@ZDHHC14	ENST00000414563.2	intronic	hsa-mir-3692,hsa-novelmir-2275
chr6	+	158402906	chr6	+	157981874	p1@SYNJ2	ENST00000355585.4	intronic	hsa-novelmir-2276
chr6	+	158733334	chr6	+	158312302	p1@TULP4	NM_020245	intronic	hsa-novelmir-2278
chr6	+	158981149	chr6	+	158560117	p@chr6:158981091..158981161,+	NM_020823	intronic	hsa-mir-7161
chr6	-	159240396	chr6	-	158819364	p1@EZR	ENST00000367075.3	intronic	hsa-novelmir-2281,hsa-novelmir-2279
chr6	+	160390117	chr6	+	159969085	p1@IGF2R	NM_000876	intronic	hsa-novelmir-2284
chr6	+	160542918	chr6	+	160121886	p1@SLC22A1	ENST00000539263.1	intronic	hsa-novelmir-2286
chr6	-	163148798	chr6	-	162727766	p1@PARK2	ENST00000366892.1	intronic	hsa-novelmir-2288
chr6	+	163835752	chr6	+	163414720	p1@QKI	NM_206855	intronic	hsa-novelmir-2289
chr6	-	167040703	chr6	-	166627215	p1@RPS6KA2	ENST00000366863.2	intronic	hsa-mir-1913
chr6	-	167370038	chr6	-	166956550	p1@RNASET2	ENST00000421787.1	intronic	hsa-novelmir-2291
chr6	-	167412570	chr6	-	166999082	p1@ENST00000444102	ENST00000444102.1	intergenic	hsa-mir-3939
chr6	+	167412885	chr6	+	166999397	p1@FGFR1OP	ENST00000609590.1	intergenic	hsa-novelmir-2292
chr6	+	167567291	chr6	+	167153803	p@chr6:167567269..167567300,+	ENST00000486697.2	intronic	hsa-novelmir-2293
chr6	+	167704848	chr6	+	167291360	p3@UNC93A	NM_018974	intronic	hsa-novelmir-2294
chr6	-	168720362	chr6	-	168319682	p3@DACT2	ENST00000610183.1	intronic	hsa-novelmir-2297
chr6	-	170102125	chr6	-	169702029	p1@WDR27	NM_001202550	intronic	hsa-novelmir-2298
chr6	+	170615850	chr6	+	170306762	p1@FAM120B	ENST00000252510.9	intronic	hsa-mir-4644
chr6	+	170863460	chr6	+	170554372	p1@TBP	ENST00000230354.6	intronic	hsa-novelmir-2300
chr7	+	192571	chr7	+	192571	p1@FAM20C	NM_020223	intronic	hsa-novelmir-2301,hsa-novelmir-2302
chr7	+	562234	chr7	+	522597	p@chr7:562226..562250,+	NR_033963	intergenic	hsa-novelmir-2303
chr7	-	766909	chr7	-	727272	p2@PRKAR1B	NM_001164760	intronic	hsa-novelmir-2305,hsa-novelmir-2304
chr7	+	856280	chr7	+	816643	p1@SUN1	NM_001171944	intronic	hsa-novelmir-2306
chr7	-	1068005	chr7	-	1028369	p1@C7orf50	ENST00000412051.1	intronic	hsa-novelmir-2307,hsa-mir-339
chr7	-	2272547	chr7	-	2232912	p1@MAD1L1	ENST00000402746.1	intronic	hsa-novelmir-2311,hsa-novelmir-2310,hsa-novelmir-2309,hsa-novelmir-2308,hsa-mir-4655
chr7	-	2354058	chr7	-	2314423	p1@SNX8	NM_013321	intronic	hsa-novelmir-2314,hsa-novelmir-2313,hsa-novelmir-2312,hsa-mir-6836
chr7	+	2559408	chr7	+	2519774	p1@LFNG	ENST00000222725.5	intronic	hsa-mir-4648,hsa-novelmir-2316
chr7	+	2598650	chr7	+	2559016	p1@IQCE	NM_152558	intronic	hsa-novelmir-2318
chr7	+	2671622	chr7	+	2631988	p2@TTYH3	NM_025250	intronic	hsa-novelmir-2319,hsa-novelmir-2320,hsa-novelmir-2321
chr7	-	2883942	chr7	-	2844308	p1@GNA12	ENST00000275364.3	intronic	hsa-novelmir-2322
chr7	+	4815266	chr7	+	4775635	p1@KIAA0415	ENST00000477680.1	intronic	hsa-novelmir-2324
chr7	-	5436875	chr7	-	5397244	p@chr7:5436858..5436915,-	NM_001080495	intronic	hsa-novelmir-2326
chr7	-	5463415	chr7	-	5423784	p1@TNRC18	NM_001080495	intronic	hsa-novelmir-2327
chr7	-	5553428	chr7	-	5513797	p1@FBXL18	ENST00000382368.3	intronic	hsa-novelmir-2329,hsa-mir-589
chr7	-	5570232	chr7	-	5530601	p1@ACTB	NM_001101	intronic	hsa-novelmir-2330
chr7	+	5632447	chr7	+	5592816	p1@FSCN1	ENST00000382361.3	intronic	hsa-novelmir-2331
chr7	-	5821277	chr7	-	5781646	p1@RNF216	ENST00000425013.2	intronic	hsa-mir-6874
chr7	+	7197008	chr7	+	7157377	p@chr7:7196986..7197017,+	ENST00000429911.1	intronic	hsa-novelmir-2335
chr7	+	7680383	chr7	+	7640752	p1@LOC729852	ENST00000463725.1	intronic	hsa-novelmir-2336,hsa-novelmir-2337
chr7	-	17980114	chr7	-	17940491	p1@SNX13	ENST00000428135.3	intronic	hsa-novelmir-2344
chr7	-	19748649	chr7	-	19709026	p1@TWISTNB	NM_001002926	intronic	hsa-mir-3146
chr7	-	20162719	chr7	-	20123096	p@chr7:20162711..20162725,-	ENST00000435968.1	intergenic	hsa-novelmir-2345
chr7	+	21467718	chr7	+	21428100	p1@SP4	NM_003112	intronic	hsa-mir-1183
chr7	-	22396773	chr7	-	22357154	p2@RAPGEF5	ENST00000405243.1	intronic	hsa-novelmir-2350,hsa-novelmir-2349,hsa-novelmir-2348
chr7	+	22893875	chr7	+	22854256	p@chr7:22893867..22893887,+	ENST00000415611.3	intergenic	hsa-novelmir-2353
chr7	+	23221667	chr7	+	23182048	p1@NUPL2	ENST00000487595.1	intronic	hsa-novelmir-2355
chr7	-	23510026	chr7	-	23470407	p1@IGF2BP3	NM_006547	intronic	hsa-novelmir-2356
chr7	-	24797068	chr7	-	24757449	p1@DFNA5	NM_001127453	intronic	hsa-novelmir-2359
chr7	-	25019774	chr7	-	24980155	p1@OSBPL3	NM_145322	intronic	hsa-novelmir-2360
chr7	-	25990794	chr7	-	25951174	p@chr7:25990767..25990800,-	XR_158815	intergenic	hsa-novelmir-2361,hsa-mir-148a
chr7	-	26141188	chr7	-	26101568	p@chr7:26141172..26141208,-	XR_158815	intergenic	hsa-novelmir-2362
chr7	-	27205156	chr7	-	27165537	p1@HOXA9	NM_152739	intronic	hsa-novelmir-2364
chr7	-	27219461	chr7	-	27179842	p1@ENST00000470747	ENST00000470747.4	intronic	hsa-mir-196b
chr7	-	27702478	chr7	-	27662859	p1@HIBADH	ENST00000428288.2	intronic	hsa-novelmir-2366
chr7	+	28725754	chr7	+	28686137	p1@CREB5	ENST00000484383.1	intronic	hsa-novelmir-2367
chr7	-	29724565	chr7	-	29684949	p1@LOC646762	NR_024278	intergenic	hsa-mir-550a-3
chr7	+	30324237	chr7	+	30284621	p1@ZNRF2	NM_147128	intronic	hsa-mir-550a-1,hsa-novelmir-2368
chr7	+	32535121	chr7	+	32495509	p1@AVL9	ENST00000404479.1	intronic	hsa-mir-550a-2
chr7	-	32801850	chr7	-	32762238	p1@ENST00000417811	ENST00000417811.2	intergenic	hsa-mir-550b-2
chr7	+	33945151	chr7	+	33905539	p1@BMPER	ENST00000426693.1	intronic	hsa-novelmir-2371
chr7	-	35077095	chr7	-	35037483	p@chr7:35077046..35077137,-	NM_015283	intronic	hsa-mir-548n
chr7	-	37488467	chr7	-	37448864	p1@ELMO1	NM_014800	intronic	hsa-mir-1200
chr7	+	37723387	chr7	+	37683784	p1@GPR141	ENST00000461610.1	intronic	hsa-novelmir-2374,hsa-novelmir-2375
chr7	+	38217974	chr7	+	38178372	p1@STARD3NL	ENST00000396013.1	intronic	hsa-novelmir-2376
chr7	+	41733530	chr7	+	41693932	p1@LOC285954	ENST00000422822.1	intergenic	hsa-novelmir-2379
chr7	+	43152246	chr7	+	43112647	p1@HECW1	ENST00000453890.1	intronic	hsa-mir-3943
chr7	+	43622707	chr7	+	43583108	p1@STK17A	NM_004760	intronic	hsa-novelmir-2380
chr7	-	43769082	chr7	-	43729483	p1@C7orf44	ENST00000446564.1	intronic	hsa-novelmir-2382,hsa-novelmir-2381
chr7	-	44058748	chr7	-	44019149	p1@POLR2J4	NR_003655	intergenic	hsa-novelmir-2384,hsa-novelmir-2383
chr7	+	44084301	chr7	+	44044702	p1@DBNL	ENST00000464762.1	intronic	hsa-mir-6837
chr7	-	44122110	chr7	-	44082511	p1@POLM	ENST00000458246.1	intronic	hsa-mir-6838
chr7	+	44143955	chr7	+	44104356	p1@AEBP1	NM_001129	intronic	hsa-mir-4649,hsa-novelmir-2385
chr7	+	44836280	chr7	+	44796681	p1@PPIA	ENST00000479021.1	intronic	hsa-novelmir-2388
chr7	-	44925080	chr7	-	44885481	p1@PURB	NM_033224	intronic	hsa-novelmir-2389,hsa-mir-4657
chr7	+	45039844	chr7	+	45000245	p1@CCM2	ENST00000488727.1	intronic	hsa-novelmir-2390
chr7	+	45613967	chr7	+	45574368	p1@ADCY1	ENST00000297323.7	intronic	hsa-novelmir-2391
chr7	-	47621709	chr7	-	47582111	p1@TNS3	NM_022748	intronic	hsa-novelmir-2393
chr7	-	48019126	chr7	-	47979529	p1@HUS1	ENST00000436444.1	intronic	hsa-novelmir-2394
chr7	+	48211055	chr7	+	48171458	p1@ABCA13	NM_152701	intronic	hsa-novelmir-2395
chr7	+	50344312	chr7	+	50304716	p1@IKZF1	ENST00000413698.1	intronic	hsa-novelmir-2398
chr7	-	50861150	chr7	-	50793453	p1@GRB10	NM_001001555	intronic	hsa-novelmir-2400,hsa-novelmir-2399
chr7	+	55433736	chr7	+	55366043	p1@LANCL2	ENST00000452107.2	intronic	hsa-novelmir-2403
chr7	-	55640195	chr7	-	55572502	p1@VOPP1	NM_030796	intronic	hsa-novelmir-2406,hsa-novelmir-2405,hsa-novelmir-2404
chr7	+	56119458	chr7	+	56051765	p1@CCT6A	ENST00000540286.1	intronic	hsa-novelmir-2407
chr7	+	56132001	chr7	+	56064308	p1@SUMF2	ENST00000438133.1	intronic	hsa-novelmir-2408
chr7	+	64126517	chr7	+	64666139	p1@ZNF107	NM_016220	intronic	hsa-mir-6839
chr7	+	65338245	chr7	+	65873258	p1@VKORC1L1	ENST00000360768.3	intronic	hsa-novelmir-2411
chr7	+	65540806	chr7	+	66075819	p1@ASL	ENST00000487982.1	intronic	hsa-novelmir-2412
chr7	-	66006125	chr7	-	66541138	p@chr7:66006117..66006125,-	ENST00000449307.3	intergenic	hsa-novelmir-2413
chr7	+	66094040	chr7	+	66629053	p3@KCTD7,p4@RABGEF1	ENST00000503687.1	intronic	hsa-novelmir-2414
chr7	+	66119554	chr7	+	66654567	p1@ENST00000439360	ENST00000503687.1	intronic	hsa-novelmir-2415,hsa-novelmir-2416
chr7	+	66205720	chr7	+	66740733	p1@KCTD7,p1@RABGEF1	ENST00000451741.2	intronic	hsa-novelmir-2418
chr7	+	69063428	chr7	+	69598442	p1@AUTS2	NM_015570	intronic	hsa-novelmir-2421,hsa-novelmir-2422
chr7	+	70596658	chr7	+	71131672	p1@WBSCR17	ENST00000333538.5	intronic	hsa-mir-3914-2,hsa-novelmir-2423,hsa-novelmir-2424,hsa-novelmir-2426
chr7	-	71802369	chr7	-	72337384	p1@CALN1	NM_001017440	intronic	hsa-novelmir-2429,hsa-novelmir-2428
chr7	-	72298761	chr7	-	72828182	p2@TYW1B	ENST00000437915.1	intergenic	hsa-novelmir-2430
chr7	+	72349928	chr7	+	72879357	p1@POM121	NM_001257190	intronic	hsa-novelmir-2431,hsa-novelmir-2432
chr7	-	73038852	chr7	-	73624522	p1@MLXIPL	ENST00000434326.1	intronic	hsa-novelmir-2437,hsa-novelmir-2436
chr7	+	73498134	chr7	+	74083804	p1@LIMK1	NM_002314	intronic	hsa-novelmir-2439
chr7	+	73588686	chr7	+	74174356	p1@EIF4H	ENST00000353999.6	intronic	hsa-mir-590
chr7	+	73703767	chr7	+	74289437	p1@CLIP2	NM_003388	intronic	hsa-novelmir-2441
chr7	+	73868236	chr7	+	74453906	p1@GTF2IRD1	ENST00000455841.2	intronic	hsa-novelmir-2442
chr7	+	74072044	chr7	+	74657718	p1@GTF2I	NM_032999	intronic	hsa-novelmir-2444
chr7	-	74489626	chr7	-	75073790	p1@WBSCR16	ENST00000329959.4	intronic	hsa-novelmir-2446
chr7	-	74867622	chr7	+	74964705	p1@GATSL2	ENST00000426327.3	intronic	hsa-novelmir-2449
chr7	+	75544475	chr7	+	75915157	p1@POR	ENST00000421059.1	intronic	hsa-mir-4651
chr7	-	75623913	chr7	-	75994595	p1@TMEM120A	ENST00000439537.1	intergenic	hsa-novelmir-2453,hsa-novelmir-2452
chr7	+	77325776	chr7	+	77696459	p1@RSBN1L	ENST00000334955.8	intronic	hsa-novelmir-2456
chr7	-	79082983	chr7	-	79453667	p1@MAGI2	NM_012301	intronic	hsa-novelmir-2457
chr7	+	80267958	chr7	+	80638642	p1@CD36	ENST00000441109.2	intronic	hsa-novelmir-2459
chr7	-	82073262	chr7	-	82443946	p1@CACNA2D1	ENST00000356860.3	intronic	hsa-novelmir-2460
chr7	+	86781769	chr7	+	87152453	p1@DMTF1	ENST00000579850.1	intronic	hsa-novelmir-2464
chr7	-	86849048	chr7	-	87219732	p1@C7orf23	ENST00000257637.3	intronic	hsa-novelmir-2466
chr7	-	91875228	chr7	-	92245914	p1@KRIT1	NM_001013406	intronic	hsa-mir-1285-1
chr7	-	92465883	chr7	-	92836569	p1@CDK6	ENST00000424848.2	intronic	hsa-novelmir-2470
chr7	-	93204036	chr7	-	93574724	p1@CALCR	NM_001742	intronic	hsa-mir-489,hsa-mir-653
chr7	+	93269601	chr7	+	93640289	p@chr7:93269596..93269602,+	ENST00000455502.1	intronic	hsa-mir-4652
chr7	-	95951380	chr7	-	96322068	p1@SLC25A13	ENST00000265631.5	intronic	hsa-mir-591
chr7	+	97736184	chr7	+	98106872	p1@LMTK2	NM_014916	intronic	hsa-novelmir-2474
chr7	-	97881530	chr7	-	98252218	p1@TECPR1	ENST00000542604.1	intronic	hsa-novelmir-2475
chr7	-	98030402	chr7	-	98401090	p1@BAIAP2L1	ENST00000005260.8	intronic	hsa-novelmir-2476
chr7	+	98476155	chr7	+	98878532	p1@TRRAP	NM_001244580	intronic	hsa-mir-3609,hsa-novelmir-2478,hsa-novelmir-2479
chr7	+	98613947	chr7	+	99016324	p@chr7:98613943..98613948,+	ENST00000360902.1	intergenic	hsa-novelmir-2481
chr7	-	98741731	chr7	-	99144108	p1@SMURF1	ENST00000361125.1	intronic	hsa-novelmir-2483,hsa-novelmir-2482
chr7	+	98923533	chr7	+	99325910	p1@ARPC1A	ENST00000441989.2	intronic	hsa-novelmir-2485
chr7	+	98972353	chr7	+	99374730	p1@ARPC1B	ENST00000429246.1	intronic	hsa-novelmir-2486
chr7	-	99063787	chr7	-	99466164	p1@ATP5J2-PTCD1,p1@ATP5J2,p1@PTCD1	ENST00000430982.1	intronic	hsa-novelmir-2487
chr7	+	99156265	chr7	+	99558642	p1@ZNF655	ENST00000486324.1	intronic	hsa-novelmir-2488
chr7	-	99699002	chr7	-	100101379	p1@MCM7	ENST00000489841.1	intronic	hsa-novelmir-2490,hsa-mir-106b,hsa-mir-93,hsa-mir-25
chr7	+	99699300	chr7	+	100101677	p1@AP4M1	ENST00000421755.1	intronic	hsa-novelmir-2491
chr7	-	99756325	chr7	-	100158702	p1@C7orf43	ENST00000456769.1	intronic	hsa-mir-4658
chr7	+	99933737	chr7	+	100336114	p1@PILRB	ENST00000310771.4	intergenic	hsa-mir-6840
chr7	+	99967137	chr7	+	100369514	p@chr7:99967123..99967146,+	ENST00000432297.2	intronic	hsa-novelmir-2495
chr7	+	99971110	chr7	+	100373487	p1@PILRA	ENST00000453419.1	intronic	hsa-novelmir-2496
chr7	-	100450259	chr7	-	100852637	p1@ENST00000412754	ENST00000412754.1	intergenic	hsa-novelmir-2499
chr7	+	100465028	chr7	+	100867406	p1@TRIP6	ENST00000437505.1	intronic	hsa-mir-6875
chr7	+	100472755	chr7	+	100875133	p1@SRRT	ENST00000457580.2	intronic	hsa-novelmir-2500
chr7	+	100728762	chr7	+	101085481	p1@TRIM56	NM_030961	intronic	hsa-novelmir-2502
chr7	+	100797757	chr7	+	101154476	p1@AP1S1	ENST00000443943.1	intronic	hsa-mir-4653
chr7	+	101006156	chr7	+	101362875	p1@EMID2	ENST00000528707.1	intergenic	hsa-novelmir-2508
chr7	+	101459288	chr7	+	101816008	p1@CUX1	NM_001202546	intronic	hsa-novelmir-2511
chr7	+	101930169	chr7	+	102286879	p@chr7:101930149..101930221,+	ENST00000444095.1	intronic	hsa-mir-4285,hsa-novelmir-2512
chr7	+	102105431	chr7	+	102464984	p1@LRWD1	ENST00000473880.1	intronic	hsa-mir-5090,hsa-mir-4467
chr7	-	102153147	chr7	-	102512700	p1@RASA4	XM_003959919	intronic	hsa-novelmir-2516,hsa-novelmir-2515,hsa-novelmir-2514
chr7	-	102283248	chr7	-	102642801	p1@UPK3BL,p9@RASA4	ENST00000519541.1	intronic	hsa-novelmir-2519,hsa-novelmir-2518,hsa-novelmir-2517
chr7	-	102613713	chr7	-	102973266	p2@FBXL13	ENST00000477915.1	intronic	hsa-novelmir-2521
chr7	-	105516937	chr7	-	105876491	p1@ATXN7L1	NM_020725	intronic	hsa-novelmir-2524,hsa-novelmir-2523,hsa-novelmir-2522
chr7	+	105517267	chr7	+	105876821	p1@CDHR3	ENST00000470188.1	intronic	hsa-novelmir-2525
chr7	-	107643603	chr7	-	108003158	p1@LAMB1	ENST00000222399.6	intronic	hsa-novelmir-2526
chr7	-	107770806	chr7	-	108130361	p1@LAMB4	NM_007356	intronic	hsa-novelmir-2527
chr7	+	112262445	chr7	+	112622390	p1@ENST00000453459	ENST00000453459.1	intergenic	hsa-novelmir-2530
chr7	-	112579900	chr7	-	112939845	p1@C7orf60	NM_152556	intronic	hsa-novelmir-2531
chr7	-	112635682	chr7	-	112995627	p1@ENST00000447785,p1@ENST00000451962	ENST00000447785.1	intergenic	hsa-novelmir-2532
chr7	+	113726392	chr7	+	114086337	p1@FOXP2	ENST00000412402.1	intronic	hsa-mir-3666
chr7	+	116312491	chr7	+	116672437	p1@MET	NM_001127500	intronic	hsa-novelmir-2536
chr7	+	116593555	chr7	+	116953501	p1@ST7	ENST00000417919.1	intronic	hsa-mir-6132,hsa-novelmir-2537
chr7	-	121784303	chr7	-	122144249	p1@AASS	ENST00000473553.1	intronic	hsa-novelmir-2540
chr7	+	124673488	chr7	+	125033434	p1@ENST00000457231	ENST00000453342.1	intergenic	hsa-novelmir-2544,hsa-novelmir-2545,hsa-novelmir-2546
chr7	-	126892994	chr7	-	127252940	p1@GRM8	ENST00000472701.1	intronic	hsa-mir-592
chr7	+	127292248	chr7	+	127652194	p1@SND1	ENST00000354725.3	intronic	hsa-mir-593,hsa-novelmir-2547,hsa-novelmir-2548,hsa-novelmir-2550,hsa-novelmir-2551
chr7	+	127807714	chr7	+	128167661	p@chr7:127807707..127807735,+	curation	intergenic	hsa-mir-129-1
chr7	+	128095932	chr7	+	128455878	p1@HILPDA	ENST00000462662.1	intergenic	hsa-novelmir-2553
chr7	-	128550763	chr7	-	128910709	p1@KCP	NM_001135914	intronic	hsa-novelmir-2554
chr7	+	129251580	chr7	+	129611739	p1@NRF1	ENST00000477428.1	intronic	hsa-novelmir-2558
chr7	-	129420060	chr7	-	129780220	p@chr7:129420052..129420074,-	curation	intergenic	hsa-mir-183,hsa-mir-96,hsa-mir-182
chr7	-	129592767	chr7	-	129952927	p1@UBE2H	NM_001202498	intronic	hsa-novelmir-2563
chr7	+	129710374	chr7	+	130070534	p1@KLHDC10	ENST00000335420.5	intronic	hsa-novelmir-2565
chr7	+	129906705	chr7	+	130266865	p1@CPA2	ENST00000480781.1	intronic	hsa-novelmir-2566
chr7	-	130080857	chr7	-	130441016	p1@CEP41	ENST00000334451.6	intronic	hsa-novelmir-2567
chr7	+	130131927	chr7	+	130492086	p1@MEST	ENST00000223215.4	intronic	hsa-mir-335,hsa-novelmir-2568
chr7	-	130137064	chr7	-	130497223	p@chr7:130137063..130137064,-	ENST00000604666.1	intergenic	hsa-novelmir-2569
chr7	-	130597617	chr7	-	130912858	p@chr7:130597585..130597624,-	ENST00000432045.2	intergenic	hsa-novelmir-2570,hsa-mir-29b-1,hsa-mir-29a
chr7	-	132766847	chr7	-	133082087	p1@CHCHD3	ENST00000262570.5	intronic	hsa-mir-3654
chr7	+	132937839	chr7	+	133253083	p1@EXOC4	ENST00000393161.2	intronic	hsa-mir-6133
chr7	-	134896270	chr7	-	135211518	p1@WDR91	ENST00000354475.4	intronic	hsa-mir-6509
chr7	+	136553399	chr7	+	136868652	p1@CHRM2	NM_001006630	intronic	hsa-mir-490,hsa-novelmir-2578
chr7	-	136846544	chr7	-	137161797	p@chr7:136846542..136846544,-	ENST00000586239.1	intergenic	hsa-novelmir-2577
chr7	-	137686806	chr7	-	138002060	p1@CREB3L2	ENST00000330387.6	intronic	hsa-novelmir-2579
chr7	-	138794466	chr7	-	139109720	p1@ZC3HAV1	NM_020119	intronic	hsa-novelmir-2580
chr7	-	139477797	chr7	-	139777998	p1@HIPK2	NM_001113239	intronic	hsa-novelmir-2586
chr7	+	139529063	chr7	+	139829264	p1@TBXAS1	ENST00000411653.1	intronic	hsa-novelmir-2587
chr7	-	139762711	chr7	-	140062911	p1@PARP12	ENST00000473341.1	intronic	hsa-novelmir-2588
chr7	-	140098314	chr7	-	140398514	p1@SLC37A3	NM_032295	intronic	hsa-novelmir-2589
chr7	+	141251210	chr7	+	141551410	p1@AGK	ENST00000495028.1	intronic	hsa-novelmir-2592
chr7	-	141401966	chr7	-	141702166	p1@KIAA1147	NM_001080392	intronic	hsa-novelmir-2593
chr7	-	142157920	chr7_KI270803v1_alt	+	457623	p1@TRBV7-5	ENST00000390382.3	intergenic	hsa-novelmir-2595
chr7	+	143078440	chr7	+	143381347	p1@ZYX	NM_003461	intronic	hsa-mir-6892,hsa-novelmir-2599,hsa-novelmir-2600
chr7	-	143599269	chr7	-	143902176	p1@FAM115A	NM_001206938	intronic	hsa-novelmir-2601
chr7	-	148581383	chr7	-	148884291	p1@EZH2	ENST00000483967.1	intronic	hsa-novelmir-2604,hsa-novelmir-2603
chr7	-	148725560	chr7	-	149028468	p1@PDIA4	ENST00000286091.4	intronic	hsa-novelmir-2606,hsa-novelmir-2605
chr7	+	148844547	chr7	+	149147455	p1@ZNF398	NM_170686	intronic	hsa-novelmir-2608
chr7	+	149570053	chr7	+	149872964	p3@ATP6V0E2	NM_145230	intronic	hsa-novelmir-2610
chr7	-	150038718	chr7	-	150341629	p1@RARRES2	ENST00000466675.1	intronic	hsa-novelmir-2611
chr7	-	150066333	chr7	-	150369244	p@chr7:150066324..150066346,-	ENST00000488310.1	intergenic	hsa-novelmir-2612
chr7	+	150725537	chr7	+	151028450	p1@ABCB8	ENST00000470645.1	intronic	hsa-novelmir-2614,hsa-novelmir-2615
chr7	-	150777888	chr7	-	151080801	p1@FASTK	ENST00000489884.1	intronic	hsa-novelmir-2617
chr7	+	150929585	chr7	+	151232499	p1@CHPF2	NM_019015	intronic	hsa-mir-671
chr7	-	150974228	chr7	-	151277142	p1@SMARCD3	NM_003078	intronic	hsa-novelmir-2618
chr7	+	151106322	chr7	+	151409236	p1@LOC100131176	NR_034013	intergenic	hsa-novelmir-2619
chr7	-	151137218	chr7	-	151440132	p1@CRYGN	ENST00000337323.2	intronic	hsa-mir-3907
chr7	-	151329319	chr7	-	151632233	p1@PRKAG2	ENST00000483775.1	intronic	hsa-novelmir-2621
chr7	-	152133073	chr7	-	152435988	p1@MLL3	NM_170606	intronic	hsa-novelmir-2623
chr7	-	156433256	chr7	-	156640562	p1@C7orf13	ENST00000418309.1	intergenic	hsa-novelmir-2629
chr7	-	156685877	chr7	-	156893183	p1@LMBR1	ENST00000353442.5	intronic	hsa-novelmir-2631,hsa-novelmir-2630
chr7	+	157129698	chr7	+	157337004	p1@DNAJB6	ENST00000486083.2	intronic	hsa-novelmir-2633,hsa-novelmir-2634
chr7	-	158380484	chr7	-	158587792	p2@PTPRN2	NM_130842	intronic	hsa-novelmir-2636,hsa-mir-595,hsa-mir-153-2
chr7	-	158937559	chr7	-	159144867	p1@VIPR2	ENST00000402066.1	intronic	hsa-novelmir-2638,hsa-novelmir-2637
chr8	+	687628	chr8	+	737628	p1@ENST00000522092,p1@uc003wpj.1	ENST00000522092.1	intergenic	hsa-novelmir-2639
chr8	+	1772113	chr8	+	1823947	p1@ARHGEF10	ENST00000349830.3	intronic	hsa-novelmir-2642
chr8	+	1993161	chr8	+	2045046	p1@MYOM2	NM_003970	intronic	hsa-mir-7160
chr8	-	6565737	chr8	-	6708216	p1@ENST00000522897,p1@ENST00000527490	ENST00000522897.1	intergenic	hsa-mir-8055
chr8	+	6566163	chr8	+	6708642	p1@AGPAT5	ENST00000523234.1	intronic	hsa-mir-4659a
chr8	+	6693080	chr8	+	6835558	p1@LOC100652791	NR_045217	intergenic	hsa-novelmir-2645
chr8	+	8886509	chr8	+	9028999	p@chr8:8886506..8886510,+	ENST00000522612.1	intronic	hsa-mir-4660
chr8	+	9413424	chr8	+	9555914	p1@TNKS	ENST00000310430.6	intronic	hsa-mir-597
chr8	-	9761854	chr8	-	9904344	p1@ENST00000521863	ENST00000521863.1	intergenic	hsa-mir-124-1
chr8	-	10697378	chr8	-	10839868	p1@PINX1	ENST00000314787.3	intronic	hsa-mir-1322
chr8	-	11059342	chr8	-	11201833	p1@XKR6	NM_173683	intronic	hsa-novelmir-2653,hsa-novelmir-2652,hsa-novelmir-2651,hsa-mir-598
chr8	+	11204638	chr8	+	11347129	p2@TDH	ENST00000326605.4	intergenic	hsa-novelmir-2654
chr8	+	11351896	chr8	+	11494387	p2@BLK	ENST00000529894.1	intronic	hsa-novelmir-2655,hsa-novelmir-2656
chr8	+	11557868	chr8	+	11700359	p@chr8:11557850..11557871,+	ENST00000526974.1	intronic	hsa-novelmir-2658
chr8	+	11653091	chr8	+	11795582	p4@FDFT1	ENST00000538689.1	intronic	hsa-novelmir-2659
chr8	-	12523083	chr8	-	12665574	p1@ENST00000500162	NR_047662	intergenic	hsa-novelmir-2661
chr8	-	12613014	chr8	-	12755505	p1@LONRF1	ENST00000398246.3	intronic	hsa-mir-3926-1
chr8	-	12613079	chr8	-	12755570	p3@LONRF1	ENST00000530693.1	intronic	hsa-novelmir-2663
chr8	-	13372360	chr8	-	13514851	p4@DLC1	ENST00000276297.4	intronic	hsa-novelmir-2664
chr8	-	15095908	chr8	-	15238399	p1@SGCZ	ENST00000382080.1	intronic	hsa-novelmir-2665,hsa-mir-383
chr8	+	15397772	chr8	+	15540263	p1@TUSC3	ENST00000510836.1	intronic	hsa-novelmir-2666
chr8	-	17104366	chr8	-	17246857	p1@CNOT7	ENST00000519954.1	intronic	hsa-novelmir-2669
chr8	-	17270816	chr8	-	17413307	p1@MTMR7	ENST00000517317.1	intronic	hsa-novelmir-2671
chr8	-	17555179	chr8	-	17697670	p1@MTUS1	ENST00000297488.6	intronic	hsa-mir-548v
chr8	+	17780502	chr8	+	17922993	p1@PCM1	ENST00000519253.1	intronic	hsa-novelmir-2673
chr8	-	18871210	chr8	-	19013700	p1@PSD3	NM_015310	intronic	hsa-novelmir-2676,hsa-novelmir-2675
chr8	+	18949259	chr8	+	19091749	p1@ENST00000518324	ENST00000518324.1	intergenic	hsa-novelmir-2678
chr8	-	19075744	chr8	-	19218234	p@chr8:19075736..19075746,-	ENST00000517949.1	intergenic	hsa-novelmir-2677
chr8	+	21946703	chr8	+	22089192	p1@FAM160B2	ENST00000427751.1	intronic	hsa-novelmir-2683
chr8	+	22022885	chr8	+	22165372	p1@BMP1	ENST00000483364.1	intronic	hsa-novelmir-2684
chr8	-	22102541	chr8	-	22245028	p1@MIR320A	curation	intergenic	hsa-mir-320a
chr8	+	22224791	chr8	+	22367278	p1@SLC39A14	ENST00000240095.6	intronic	hsa-novelmir-2685
chr8	-	22550993	chr8	-	22693480	p1@EGR3	NM_004430	intronic	hsa-novelmir-2686
chr8	+	22857061	chr8	+	22999548	p1@RHOBTB2	NM_015178	intronic	hsa-novelmir-2687
chr8	-	22926544	chr8	-	23069031	p1@TNFRSF10B	ENST00000523504.1	intronic	hsa-novelmir-2690,hsa-novelmir-2689,hsa-novelmir-2688
chr8	-	23261633	chr8	-	23404120	p1@LOXL2	ENST00000523833.2	intronic	hsa-novelmir-2691
chr8	-	24814126	chr8	-	24956612	p1@NEFL	NM_006158	intronic	hsa-mir-6841
chr8	+	25042230	chr8	+	25184715	p1@DOCK5	NM_024940	intronic	hsa-mir-6876
chr8	+	25316749	chr8	+	25459233	p1@CDCA2	ENST00000380665.3	intronic	hsa-novelmir-2693
chr8	-	27168787	chr8	-	27311270	p1@TRIM35	NM_171982	intronic	hsa-novelmir-2697,hsa-novelmir-2696
chr8	+	27183075	chr8	+	27325558	p1@PTK2B	NM_173175	intronic	hsa-mir-6842
chr8	-	27472217	chr8	-	27614700	p1@CLU	ENST00000518050.1	intronic	hsa-mir-6843
chr8	-	27850188	chr8	-	27992671	p1@SCARA5	ENST00000380385.2	intronic	hsa-mir-4287
chr8	+	27950663	chr8	+	28093146	p1@ELP3	NM_018091	intronic	hsa-novelmir-2698
chr8	+	28351765	chr8	+	28494248	p1@FZD3	ENST00000240093.3	intronic	hsa-novelmir-2699
chr8	+	28913467	chr8	+	29055950	p1@ENST00000560865	ENST00000522468.1	intronic	hsa-novelmir-2701
chr8	-	29120587	chr8	-	29263070	p1@KIF13B	ENST00000524189.1	intronic	hsa-novelmir-2703,hsa-novelmir-2702
chr8	-	29208199	chr8	-	29350682	p1@DUSP4	ENST00000240100.2	intronic	hsa-novelmir-2705,hsa-novelmir-2704
chr8	+	30242057	chr8	+	30384541	p1@RBPMS	ENST00000287771.5	intronic	hsa-novelmir-2707
chr8	-	30585352	chr8	-	30727835	p1@GSR	ENST00000546342.1	intronic	hsa-novelmir-2708
chr8	+	30891353	chr8	+	31033837	p1@WRN	ENST00000298139.5	intronic	hsa-novelmir-2709
chr8	+	32405829	chr8	+	32548311	p1@NRG1	ENST00000287842.3	intronic	hsa-novelmir-2711,hsa-novelmir-2712
chr8	+	37654401	chr8	+	37796883	p1@GPR124	NM_032777	intronic	hsa-novelmir-2717
chr8	+	38089126	chr8	+	38231608	p1@DDHD2	ENST00000526237.1	intronic	hsa-novelmir-2720
chr8	-	38239781	chr8	-	38382263	p1@WHSC1L1	ENST00000317025.8	intronic	hsa-novelmir-2721
chr8	-	38326153	chr8	-	38468635	p1@FGFR1	ENST00000397091.5	intronic	hsa-novelmir-2724,hsa-novelmir-2723
chr8	+	38759305	chr8	+	38901787	p1@PLEKHA2	ENST00000521784.1	intronic	hsa-novelmir-2727
chr8	+	38854492	chr8	+	38996973	p1@ADAM9	NM_003816	intronic	hsa-novelmir-2728
chr8	+	39759876	chr8	+	39902357	p3@IDO1	ENST00000519154.1	intronic	hsa-novelmir-2729
chr8	-	41166990	chr8	-	41309471	p1@SFRP1	NM_003012	intronic	hsa-novelmir-2731,hsa-mir-548ao
chr8	+	41435719	chr8	+	41578200	p1@AGPAT6	ENST00000396987.3	intronic	hsa-novelmir-2734
chr8	-	41435940	chr8	-	41578421	p1@ENST00000523081	ENST00000523081.1	intergenic	hsa-novelmir-2732
chr8	-	41655140	chr8	-	41797622	p1@ANK1	NM_020477	intronic	hsa-mir-486-1
chr8	+	42128836	chr8	+	42271318	p1@IKBKB	ENST00000523105.1	intronic	hsa-novelmir-2736
chr8	-	42751746	chr8	-	42896603	p1@RNF170	ENST00000531440.1	intronic	hsa-mir-4469
chr8	+	48173530	chr8	+	47260938	p1@KIAA0146	ENST00000518074.1	intronic	hsa-novelmir-2738
chr8	-	48872696	chr8	-	47960136	p1@PRKDC	ENST00000518216.1	intronic	hsa-novelmir-2739
chr8	-	55014489	chr8	-	54101929	p1@LYPLA1	NM_006330	intronic	hsa-novelmir-2747
chr8	+	55563118	chr8	+	54650558	p@chr8:55563117..55563119,+	ENST00000521465.1	intergenic	hsa-novelmir-2749
chr8	-	57906421	chr8	-	56993862	p1@IMPAD1	NM_017813	intronic	hsa-novelmir-2750
chr8	-	59572388	chr8	-	58659829	p1@NSMAF	ENST00000038176.3	intronic	hsa-novelmir-2753
chr8	-	60031630	chr8	-	59119071	p1@TOX	NM_014729	intronic	hsa-novelmir-2754
chr8	+	61591303	chr8	+	60678744	p1@CHD7	NM_017780	intronic	hsa-novelmir-2757
chr8	+	62490699	chr8	+	61578140	p1@uc003xuk.2	ENST00000519669.1	intergenic	hsa-novelmir-2759
chr8	+	62627308	chr8	+	61714749	p1@MIR4470	curation	intergenic	hsa-mir-4470
chr8	+	65285866	chr8	+	64373309	p1@ENST00000520799,p1@ENST00000521441,p1@uc003xvd.2	ENST00000521441.1	intergenic	hsa-mir-124-2
chr8	-	68256016	chr8	-	67343781	p1@ARFGEF1	NM_006421	intronic	hsa-novelmir-2762
chr8	+	70405082	chr8	+	69492847	p1@SULF1	NM_001128205	intronic	hsa-novelmir-2765
chr8	-	71336855	chr8	-	70424620	p1@ENST00000465359	ENST00000465359.1	intergenic	hsa-novelmir-2768
chr8	-	72459939	chr8	-	71547704	p1@ENST00000523987,p1@uc003xyw.2	ENST00000523987.1	intronic	hsa-novelmir-2769
chr8	-	74036150	chr8	-	73123915	p4@C8orf84	ENST00000519697.1	intronic	hsa-novelmir-2770
chr8	-	74791095	chr8	-	73878860	p1@UBE2W	ENST00000358757.5	intronic	hsa-novelmir-2771
chr8	-	74884421	chr8	-	73972186	p1@TCEB1	ENST00000602840.1	intronic	hsa-novelmir-2772
chr8	+	75516349	chr8	+	74604114	p@chr8:75516333..75516359,+	NR_033830	intergenic	hsa-mir-2052,hsa-novelmir-2773
chr8	+	78311292	chr8	+	77399056	p1@ENST00000518706	ENST00000518706.2	intergenic	hsa-novelmir-2779
chr8	-	82645129	chr8	-	81732894	p5@ZFAND1	ENST00000517353.1	intronic	hsa-novelmir-2787
chr8	+	85095509	chr8	+	84183274	p1@RALYL	ENST00000521695.1	intronic	hsa-novelmir-2788
chr8	-	87520884	chr8	-	86508655	p1@FAM82B	ENST00000430676.2	intronic	hsa-novelmir-2789
chr8	+	89340073	chr8	+	88327844	p1@ENST00000520849,p1@ENST00000521433	ENST00000521433.1	intergenic	hsa-novelmir-2791
chr8	-	90769903	chr8	-	89757675	p1@ENST00000504145	ENST00000504145.1	intergenic	hsa-novelmir-2793
chr8	-	91803880	chr8	-	90791652	p5@TMEM64	ENST00000521852.1	intronic	hsa-novelmir-2794
chr8	-	91871470	chr8	-	90859242	p2@ENST00000517884	ENST00000517884.1	intergenic	hsa-novelmir-2795
chr8	-	92053077	chr8	-	91040849	p1@TMEM55A	ENST00000520709.1	intronic	hsa-novelmir-2797
chr8	+	92129813	chr8	+	91117585	p@chr8:92129810..92129814,+	ENST00000448384.2	intronic	hsa-mir-4661
chr8	+	92261547	chr8	+	91249319	p1@SLC26A7	ENST00000309536.2	intronic	hsa-novelmir-2798
chr8	-	93107458	chr8	-	92095230	p2@RUNX1T1	ENST00000518256.1	intronic	hsa-novelmir-2799
chr8	-	94928867	chr8	-	93916639	p@chr8:94928861..94928882,-	ENST00000607097.1	intergenic	hsa-mir-378d-2
chr8	+	95653402	chr8	+	94641174	p1@ESRP1	ENST00000358397.5	intronic	hsa-novelmir-2804
chr8	+	96037225	chr8	+	95024997	p1@C8orf38	ENST00000520757.1	intronic	hsa-mir-3150a
chr8	-	96088127	chr8	-	95075899	p@chr8:96088115..96088137,-	ENST00000518598.1	intergenic	hsa-mir-3150b
chr8	-	97273836	chr8	-	96261608	p1@MTERFD1	ENST00000523821.1	intronic	hsa-novelmir-2806
chr8	+	97274159	chr8	+	96261931	p1@PTDSS1	ENST00000517309.1	intronic	hsa-novelmir-2807
chr8	-	99837899	chr8	-	98825671	p1@STK3	NM_001256313	intronic	hsa-novelmir-2812
chr8	+	100025502	chr8	+	99013274	p1@VPS13B	NM_152564	intronic	hsa-novelmir-2814
chr8	-	100549787	chr8	-	99537559	p@chr8:100549773..100549807,-	curation	intergenic	hsa-mir-875,hsa-mir-599
chr8	-	101118228	chr8	-	100106000	p1@RGS22	ENST00000519725.1	intronic	hsa-mir-1273a
chr8	-	101734315	chr8	-	100722087	p1@PABPC1	NM_002568	intronic	hsa-mir-7705
chr8	+	102504667	chr8	+	101492439	p1@GRHL2	NM_024915	intronic	hsa-novelmir-2815
chr8	-	103136489	chr8	-	102124261	p2@NCALD	ENST00000524209.1	intronic	hsa-novelmir-2818,hsa-novelmir-2817,hsa-novelmir-2816
chr8	-	103251165	chr8	-	102238937	p1@RRM2B	ENST00000523957.1	intronic	hsa-novelmir-2819
chr8	-	103424928	chr8	-	102412700	p1@UBR5	NM_015902	intronic	hsa-novelmir-2821,hsa-novelmir-2820
chr8	-	103876391	chr8	-	102864163	p1@AZIN1	NM_148174	intronic	hsa-novelmir-2826,hsa-novelmir-2825
chr8	+	103876556	chr8	+	102864328	p1@ENST00000524007	ENST00000522939.1	intronic	hsa-novelmir-2827
chr8	+	104152976	chr8	+	103140748	p1@BAALC	ENST00000297574.6	intronic	hsa-mir-3151
chr8	+	104513011	chr8	+	103500783	p2@RIMS2	NM_001100117	intronic	hsa-novelmir-2829
chr8	-	105601486	chr8	-	104589258	p1@LRP12	curation	intronic	hsa-mir-548a-3
chr8	+	105715921	chr8	+	104703693	p1@ENST00000518180	ENST00000518180.1	intronic	hsa-novelmir-2830
chr8	-	107072690	chr8	-	106060462	p1@ENST00000520078,p1@ENST00000520594,p1@ENST00000521622,p1@ENST00000524045	ENST00000520078.1	intergenic	hsa-novelmir-2831
chr8	+	107670084	chr8	+	106657856	p2@OXR1	ENST00000312046.6	intronic	hsa-novelmir-2832
chr8	-	109260946	chr8	-	108248717	p1@EIF3E	ENST00000518100.1	intronic	hsa-novelmir-2834
chr8	-	109799657	chr8	-	108787428	p@chr8:109799654..109799661,-	ENST00000518838.1	intronic	hsa-novelmir-2835
chr8	-	116681202	chr8	-	115668975	p1@TRPS1	NM_014112	intronic	hsa-novelmir-2840
chr8	-	117887105	chr8	-	116874866	p10@RAD21	NM_006265	intronic	hsa-mir-3610
chr8	-	119124065	chr8	-	118111826	p1@EXT1	NM_000127	intronic	hsa-novelmir-2844,hsa-novelmir-2843
chr8	+	119633659	chr8	+	118621420	p@chr8:119633640..119633674,+	NR_038210	intergenic	hsa-novelmir-2846
chr8	-	119634184	chr8	-	118621945	p1@SAMD12	NM_001101676	intronic	hsa-novelmir-2845
chr8	-	120868262	chr8	-	119856022	p2@DSCC1	ENST00000313655.4	intronic	hsa-novelmir-2847
chr8	+	121137342	chr8	+	120125103	p1@COL14A1	ENST00000537875.1	intronic	hsa-novelmir-2848
chr8	+	121457661	chr8	+	120445421	p1@MTBP	ENST00000305949.1	intronic	hsa-novelmir-2849
chr8	+	123794001	chr8	+	122781762	p1@ZHX2	NM_014943	intronic	hsa-novelmir-2852
chr8	-	124253617	chr8	-	123241377	p1@C8orf76	curation	intronic	hsa-mir-4663
chr8	-	124408670	chr8	-	123396430	p1@ATAD2	ENST00000517666.1	intronic	hsa-mir-548d-1
chr8	+	124429014	chr8	+	123416774	p1@WDYHV1	ENST00000522194.1	intronic	hsa-novelmir-2854,hsa-novelmir-2855
chr8	-	125551325	chr8	-	124539084	p1@TATDN1	ENST00000276692.6	intronic	hsa-mir-6844
chr8	-	125869757	chr8	-	124857515	p1@ENST00000533496	ENST00000533496.1	intergenic	hsa-novelmir-2857
chr8	-	126103998	chr8	-	125091756	p1@KIAA0196	ENST00000517845.1	intronic	hsa-novelmir-2859
chr8	+	128806787	chr8	+	127794541	p1@PVT1	ENST00000521951.1	intergenic	hsa-mir-1204,hsa-novelmir-2862
chr8	+	128909661	chr8	+	127897415	p@chr8:128909653..128909681,+	ENST00000517838.1	intergenic	hsa-mir-1205,hsa-novelmir-2863
chr8	+	129010554	chr8	+	127998308	p@chr8:129010544..129010566,+	ENST00000522875.1	intergenic	hsa-mir-1206,hsa-mir-1207,hsa-novelmir-2864
chr8	-	130587261	chr8	-	129575015	p1@ENST00000523151	ENST00000523151.1	intergenic	hsa-mir-3686
chr8	-	131028802	chr8	-	130016556	p2@FAM49B	ENST00000518285.1	intronic	hsa-novelmir-2868,hsa-mir-5194
chr8	-	131370837	chr8	-	130358591	p@chr8:131370806..131370877,-	ENST00000521075.1	intronic	hsa-novelmir-2871
chr8	-	131455920	chr8	-	130443674	p1@ASAP1	NM_018482	intronic	hsa-novelmir-2873
chr8	-	133687788	chr8	-	132675542	p1@LRRC6	ENST00000518642.1	intronic	hsa-novelmir-2877
chr8	+	133879203	chr8	+	132866958	p1@TG	NM_003235	intronic	hsa-novelmir-2878
chr8	-	134087272	chr8	-	133075027	p1@SLA	ENST00000522119.1	intronic	hsa-mir-7848
chr8	-	134584130	chr8	-	133571887	p2@ST3GAL1	ENST00000518298.1	intronic	hsa-novelmir-2880,hsa-novelmir-2879
chr8	-	135844520	chr8	-	134832277	p@chr8:135844510..135844527,-	curation	intergenic	hsa-mir-30d,hsa-mir-30b
chr8	+	136469699	chr8	+	135457456	p1@KHDRBS3	ENST00000355849.5	intronic	hsa-novelmir-2881
chr8	-	141467843	chr8	-	140457744	p1@TRAPPC9	NM_001160372	intronic	hsa-novelmir-2883,hsa-novelmir-2882
chr8	-	141538484	chr8	-	140528385	p@chr8:141538472..141538486,-	ENST00000560295.1	intergenic	hsa-novelmir-2885
chr8	-	142011328	chr8	-	141001229	p1@PTK2	ENST00000522684.1	intronic	hsa-novelmir-2889,hsa-novelmir-2888,hsa-novelmir-2887,hsa-novelmir-2886,hsa-mir-151a
chr8	-	142138322	chr8	-	141128223	p1@ENST00000520885	ENST00000520885.1	intergenic	hsa-novelmir-2891
chr8	+	142402121	chr8	+	141392021	p1@PTP4A3	ENST00000520105.1	intronic	hsa-novelmir-2892,hsa-novelmir-2893,hsa-novelmir-2894
chr8	-	143484510	chr8	-	142403149	p1@TSNARE1	ENST00000519651.1	intronic	hsa-novelmir-2896
chr8	+	143531031	chr8	+	142449670	p1@BAI1	ENST00000521208.1	intronic	hsa-novelmir-2897,hsa-novelmir-2898
chr8	-	143751385	chr8	-	142669967	p1@JRK	ENST00000422119.2	intergenic	hsa-novelmir-2899
chr8	+	144329109	chr8	+	143246939	p1@ZFP41	NM_173832	intronic	hsa-novelmir-2900
chr8	-	144623607	chr8	-	143541437	p1@ZC3H3	NM_015117	intronic	hsa-novelmir-2902,hsa-novelmir-2901
chr8	-	144660500	chr8	-	143578330	p1@NAPRT1	ENST00000462059.1	intronic	hsa-novelmir-2904,hsa-novelmir-2903
chr8	-	144660784	chr8	-	143578614	p2@NAPRT1	ENST00000449291.2	intronic	hsa-novelmir-2905
chr8	-	144679585	chr8	-	143597415	p1@EEF1D	ENST00000526838.1	intronic	hsa-novelmir-2907,hsa-novelmir-2906
chr8	-	144815949	chr8	-	143733779	p1@FAM83H	ENST00000388913.3	intronic	hsa-mir-4664
chr8	-	144854033	chr8	-	143771863	p1@ENST00000529743	ENST00000529743.1	intergenic	hsa-novelmir-2908
chr8	-	144897891	chr8	-	143815721	p1@SCRIB	NM_015356	intronic	hsa-mir-937
chr8	-	144911485	chr8	-	143829315	p1@PUF60	ENST00000527197.1	intronic	hsa-novelmir-2910,hsa-novelmir-2909
chr8	-	144923139	chr8	-	143840967	p1@NRBP2	NM_178564	intronic	hsa-mir-6845
chr8	-	145025085	chr8	-	143950917	p2@PLEC	NM_201380	intronic	hsa-mir-661
chr8	-	145115595	chr8	-	144060692	p1@OPLAH	NM_017570	intronic	hsa-mir-6846
chr8	+	145133575	chr8	+	144078672	p1@EXOSC4	ENST00000525936.1	intronic	hsa-mir-6847
chr8	-	145158669	chr8	-	144103766	p1@SHARPIN	ENST00000398712.2	intronic	hsa-novelmir-2912
chr8	-	145550515	chr8	-	144326852	p1@DGAT1	NM_012079	intronic	hsa-mir-6848
chr8	-	145582132	chr8	-	144358472	p1@FBXL6	ENST00000455319.2	intronic	hsa-novelmir-2917
chr8	+	145582273	chr8	+	144358613	p1@GPR172A	NM_024531	intronic	hsa-novelmir-2918
chr8	+	145597736	chr8	+	144374047	p1@ADCK5	ENST00000529654.1	intronic	hsa-novelmir-2920
chr8	-	145634710	chr8	-	144409326	p1@CPSF1	NM_013291	intronic	hsa-mir-6849,hsa-mir-939
chr8	-	145669823	chr8	-	144444440	p1@TONSL	ENST00000409379.3	intronic	hsa-mir-6893
chr8	-	145688246	chr8	-	144462863	p1@CYHR1	ENST00000530374.1	intronic	hsa-novelmir-2923
chr8	+	145703389	chr8	+	144478006	p1@PPP1R16A	ENST00000526183.1	intronic	hsa-novelmir-2924
chr8	-	146017775	chr8	-	144792390	p1@RPL8	ENST00000394920.2	intronic	hsa-mir-6850
chr9	+	214868	chr9	+	214868	p1@DOCK8	ENST00000454469.2	intronic	hsa-novelmir-2931
chr9	+	684273	chr9	+	684273	p4@KANK1	ENST00000382297.2	intronic	hsa-novelmir-2932
chr9	+	2015347	chr9	+	2015347	p1@SMARCA2	NM_003070	intronic	hsa-novelmir-2934
chr9	+	2621787	chr9	+	2621787	p1@VLDLR	NM_003383	intronic	hsa-novelmir-2936
chr9	-	4348406	chr9	-	4348406	p28@GLIS3	ENST00000471664.1	intronic	hsa-novelmir-2939
chr9	+	4792944	chr9	+	4792944	p1@RCL1	ENST00000442869.1	intronic	hsa-mir-101-2
chr9	+	6007508	chr9	+	6007508	p1@MIR4665	curation	intergenic	hsa-mir-4665
chr9	+	6413205	chr9	+	6413205	p1@UHRF2	ENST00000469298.1	intronic	hsa-novelmir-2941
chr9	-	6645724	chr9	-	6645724	p1@GLDC	NM_000170	intronic	hsa-novelmir-2942
chr9	+	6758068	chr9	+	6758068	p1@KDM4C	ENST00000442236.2	intronic	hsa-novelmir-2945
chr9	-	10612979	chr9	-	10612979	p2@PTPRD	NM_002839	intronic	hsa-novelmir-2947
chr9	+	18474151	chr9	+	18474153	p1@ADAMTSL1	ENST00000380570.4	intronic	hsa-mir-3152
chr9	-	20622498	chr9	-	20622499	p1@MLLT3	NM_004529	intronic	hsa-mir-4473,hsa-mir-4474
chr9	+	20684258	chr9	+	20684259	p@chr9:20684247..20684272,+	ENST00000604036.1	intronic	hsa-mir-491
chr9	-	21559854	chr9	-	21559855	p1@MIR31HG	NR_027054	intergenic	hsa-mir-31
chr9	+	21802648	chr9	+	21802649	p1@MTAP	ENST00000580900.1	intronic	hsa-novelmir-2955,hsa-novelmir-2956,hsa-novelmir-2957,hsa-novelmir-2958
chr9	-	21994387	chr9	-	21994388	p1@CDKN2A	ENST00000530628.2	intronic	hsa-novelmir-2959
chr9	-	27529808	chr9	-	27529810	p1@MOB3B	ENST00000262244.5	intronic	hsa-novelmir-2963
chr9	-	29212228	chr9	-	29212230	p@chr9:29212195..29212234,-	NM_001258282	intronic	hsa-novelmir-2964,hsa-mir-873,hsa-mir-876
chr9	+	31253784	chr9	+	31253786	p1@ENST00000497974	ENST00000497974.1	intergenic	hsa-novelmir-2966
chr9	-	32526193	chr9	-	32526195	p1@DDX58	ENST00000379868.1	intronic	hsa-novelmir-2967
chr9	-	32573157	chr9	-	32573159	p1@NDUFB6	ENST00000350021.2	intronic	hsa-novelmir-2968
chr9	-	33167157	chr9	-	33167159	p1@B4GALT1	ENST00000535206.1	intronic	hsa-novelmir-2974,hsa-novelmir-2972,hsa-novelmir-2971
chr9	+	33290525	chr9	+	33290527	p1@NFX1	ENST00000379521.4	intronic	hsa-novelmir-2975
chr9	-	33473896	chr9	-	33473898	p1@NOL6	ENST00000464829.1	intronic	hsa-mir-6851
chr9	+	33585292	chr9	+	33585294	p@chr9:33585291..33585294,+	ENST00000433357.2	intergenic	hsa-novelmir-2977,hsa-novelmir-2978
chr9	+	34329567	chr9	+	34329569	p1@NUDT2	NM_001161	intronic	hsa-novelmir-2981
chr9	+	34989742	chr9	+	34989745	p1@DNAJB5	ENST00000537321.1	intronic	hsa-novelmir-2984
chr9	-	35072622	chr9	-	35072625	p1@VCP	ENST00000448530.1	intronic	hsa-novelmir-2985
chr9	-	35096588	chr9	-	35096591	p1@PIGO	ENST00000492770.1	intronic	hsa-novelmir-2986
chr9	+	35162022	chr9	+	35162025	p1@UNC13B	ENST00000396787.1	intronic	hsa-novelmir-2987
chr9	+	35489881	chr9	+	35489884	p2@RUSC2	NM_014806	intronic	hsa-novelmir-2988,hsa-novelmir-2989
chr9	+	35605259	chr9	+	35605262	p1@TESK1	NM_006285	intronic	hsa-mir-4667
chr9	-	35665189	chr9	-	35665192	p1@C9orf100	ENST00000475323.1	intronic	hsa-novelmir-2990
chr9	-	35732186	chr9	-	35732189	p1@TLN1	NM_006289	intronic	hsa-novelmir-2992,hsa-novelmir-2991,hsa-mir-6852
chr9	+	35732600	chr9	+	35732603	p1@CREB3	ENST00000486056.1	intronic	hsa-mir-6853
chr9	+	36036910	chr9	+	36036913	p1@RECK	NM_021111	intronic	hsa-novelmir-2993
chr9	-	37034198	chr9	-	37034201	p2@PAX5	ENST00000358127.4	intronic	hsa-novelmir-2996,hsa-novelmir-2995,hsa-novelmir-2994,hsa-mir-4476,hsa-mir-4540
chr9	+	37079914	chr9	+	37079917	p1@LOC100506710	NR_036592	intergenic	hsa-novelmir-2998,hsa-novelmir-2999
chr9	+	37120571	chr9	+	37120574	p1@ZCCHC7	ENST00000534928.1	intronic	hsa-novelmir-3000,hsa-novelmir-3001
chr9	-	37576347	chr9	-	37576350	p1@FBXO10	ENST00000276960.7	intronic	hsa-novelmir-3002
chr9	+	37650973	chr9	+	37650976	p1@FRMPD1	ENST00000377765.3	intronic	hsa-novelmir-3003
chr9	-	37785061	chr9	-	37785064	p1@EXOSC3	ENST00000465229.1	intronic	hsa-novelmir-3006,hsa-novelmir-3005,hsa-novelmir-3004
chr9	+	37800794	chr9	+	37800797	p1@DCAF10	NM_024345	intronic	hsa-novelmir-3007,hsa-novelmir-3008
chr9	-	37904124	chr9	-	37904127	p1@MCART1	NR_024872	intronic	hsa-novelmir-3009
chr9	-	38069224	chr9	-	38069227	p1@SHB	NM_003028	intronic	hsa-novelmir-3011,hsa-novelmir-3010
chr9	-	73483968	chr9	-	70869052	p1@TRPM3	ENST00000377101.1	intronic	hsa-mir-204
chr9	-	74526109	chr9	-	71911193	p1@FAM108B1	NM_016014	intronic	hsa-novelmir-3034,hsa-novelmir-3033
chr9	-	74980124	chr9	-	72365208	p1@ZFAND5	ENST00000376962.5	intronic	hsa-novelmir-3036
chr9	+	75766781	chr9	+	73151865	p1@ANXA1	NM_000700	intronic	hsa-novelmir-3037
chr9	-	80263236	chr9	-	77648320	p1@GNA14	NM_004297	intronic	hsa-novelmir-3041
chr9	-	80646866	chr9	-	78031950	p1@GNAQ	ENST00000286548.4	intronic	hsa-novelmir-3042
chr9	+	80912043	chr9	+	78297127	p1@PSAT1	NM_058179	intronic	hsa-novelmir-3045
chr9	-	86536347	chr9	-	83921432	p1@KIF27	NM_017576	intronic	hsa-novelmir-3051
chr9	-	86595123	chr9	-	83980208	p1@HNRNPK	ENST00000360384.5	intronic	hsa-mir-7-1
chr9	+	88420547	chr9	+	85805632	p1@LOC389765	NR_029410	intergenic	hsa-novelmir-3054
chr9	+	88556212	chr9	+	85941297	p1@NAA35	ENST00000361671.5	intronic	hsa-novelmir-3055
chr9	-	88897453	chr9	-	86282538	p1@ISCA1,p2@GOLM1	ENST00000326094.4	intronic	hsa-novelmir-3056
chr9	+	90112787	chr9	+	87497872	p1@DAPK1	ENST00000408954.3	intronic	hsa-novelmir-3058,hsa-novelmir-3059
chr9	+	91150093	chr9	+	88535178	p1@NXNL2	ENST00000478686.1	intronic	hsa-novelmir-3061
chr9	+	91926113	chr9	+	89311198	p1@CKS2	NM_001827	intronic	hsa-mir-3153
chr9	+	91933426	chr9	+	89318511	p1@SECISBP2	ENST00000375807.3	intronic	hsa-novelmir-3063
chr9	-	92113004	chr9	-	89498089	p1@SEMA4D	ENST00000455551.2	intronic	hsa-novelmir-3068,hsa-novelmir-3067,hsa-novelmir-3066,hsa-novelmir-3065,hsa-novelmir-3064
chr9	-	93195822	chr9	-	90433540	p1@ENST00000436671	ENST00000436671.1	intergenic	hsa-novelmir-3071
chr9	-	93344931	chr9	-	90582649	p1@ENST00000429044	ENST00000449990.1	intergenic	hsa-novelmir-3072
chr9	+	93564101	chr9	+	90801819	p1@SYK	ENST00000375754.4	intronic	hsa-novelmir-3074
chr9	-	94474441	chr9	-	91712159	p@chr9:94474425..94474448,-	ENST00000375715.1	intronic	hsa-mir-3910-2
chr9	-	95055977	chr9	-	92293695	p1@IARS	ENST00000447699.2	intronic	hsa-novelmir-3076,hsa-mir-3651
chr9	-	95298272	chr9	-	92535990	p1@ECM2	ENST00000444490.2	intronic	hsa-mir-4670
chr9	-	95432378	chr9	-	92670096	p1@IPPK	NM_022755	intronic	hsa-novelmir-3078,hsa-novelmir-3077
chr9	-	95527115	chr9	-	92764833	p1@BICD2	ENST00000356884.6	intronic	hsa-novelmir-3081,hsa-novelmir-3080,hsa-novelmir-3079
chr9	+	96338909	chr9	+	93576627	p1@PHF2	NM_005392	intronic	hsa-mir-548au,hsa-novelmir-3083
chr9	+	96793095	chr9	+	94030813	p1@PTPDC1	NM_001253830	intronic	hsa-novelmir-3084
chr9	+	96928540	chr9	+	94166258	p@chr9:96928516..96928603,+	ENST00000602703.1	intergenic	hsa-let-7a-1,hsa-let-7f-1,hsa-let-7d,hsa-novelmir-3085
chr9	+	97489000	chr9	+	94726718	p2@C9orf3	ENST00000297979.5	intronic	hsa-mir-2278,hsa-novelmir-3087
chr9	+	97767271	chr9	+	95004989	p1@C9orf3	ENST00000471978.1	intronic	hsa-mir-23b,hsa-mir-27b,hsa-mir-24-1,hsa-mir-6081
chr9	+	98637973	chr9	+	95875691	p1@C9orf102	ENST00000288985.7	intronic	hsa-novelmir-3089
chr9	+	98748800	chr9	+	95986518	p@chr9:98748797..98748801,+	ENST00000320486.5	intronic	hsa-novelmir-3090
chr9	-	99540369	chr9	-	96778087	p1@ZNF510	ENST00000375231.1	intronic	hsa-novelmir-3091
chr9	-	100000990	chr9	-	97238708	p1@ENST00000366109,p1@uc010msl.1	ENST00000607322.1	intergenic	hsa-novelmir-3094
chr9	-	100684782	chr9	-	97922500	p1@C9orf156	ENST00000375117.4	intronic	hsa-novelmir-3095
chr9	-	101017931	chr9	-	98255649	p1@TBC1D2	ENST00000375066.5	intronic	hsa-mir-6854
chr9	+	101706189	chr9	+	98943907	p1@COL15A1	NM_001855	intronic	hsa-novelmir-3097,hsa-novelmir-3099
chr9	+	102584270	chr9	+	99821988	p1@NR4A3	NM_173200	intronic	hsa-novelmir-3100
chr9	+	102861525	chr9	+	100099243	p1@INVS	ENST00000262457.2	intronic	hsa-novelmir-3102
chr9	+	109040466	chr9	+	106278185	p1@ENST00000435485	ENST00000435485.1	intergenic	hsa-mir-8081
chr9	+	109625447	chr9	+	106863166	p1@ZNF462	ENST00000472574.1	intronic	hsa-novelmir-3106
chr9	-	111882207	chr9	-	109119927	p1@C9orf5	NM_032012	intronic	hsa-mir-32
chr9	+	112810976	chr9	+	110048696	p1@AKAP2,p1@PALM2-AKAP2	ENST00000374525.1	intronic	hsa-novelmir-3111
chr9	-	113342010	chr9	-	110579730	p1@SVEP1	ENST00000374469.1	intronic	hsa-novelmir-3113
chr9	-	114047155	chr9	-	111284875	p1@ENST00000426204	ENST00000426204.1	intergenic	hsa-mir-7702
chr9	+	114659094	chr9	+	111896814	p1@UGCG	ENST00000374279.3	intronic	hsa-mir-4668
chr9	-	115095899	chr9	-	112333619	p1@PTBP3	ENST00000450374.1	intronic	hsa-novelmir-3116
chr9	+	115513046	chr9	+	112750766	p1@SNX30	ENST00000374232.3	intronic	hsa-novelmir-3117
chr9	-	115983557	chr9	-	113221277	p1@FKBP15	ENST00000462889.1	intronic	hsa-novelmir-3118
chr9	-	116102534	chr9	-	113340254	p1@WDR31	ENST00000465205.1	intronic	hsa-novelmir-3119
chr9	+	116263787	chr9	+	113501507	p2@RGS3	ENST00000394646.3	intronic	hsa-novelmir-3120,hsa-novelmir-3121
chr9	+	116638589	chr9	+	113876309	p1@ZNF618	NM_133374	intronic	hsa-novelmir-3123
chr9	+	116917817	chr9	+	114155537	p1@COL27A1	XM_011519139.1	intronic	hsa-mir-455,hsa-novelmir-3124,hsa-novelmir-3126,hsa-novelmir-3127
chr9	-	117150261	chr9	-	114387981	p1@AKNA	ENST00000374088.3	intronic	hsa-novelmir-3129,hsa-novelmir-3128
chr9	-	117692564	chr9	-	114930284	p1@AB590754	ENST00000223795.2	intronic	hsa-novelmir-3131
chr9	+	118916093	chr9	+	116153814	p1@PAPPA	ENST00000328252.3	intronic	hsa-novelmir-3135
chr9	-	123342437	chr9	-	120580159	p1@CDK5RAP2	ENST00000349780.4	intronic	hsa-novelmir-3139
chr9	-	123476748	chr9	-	120714470	p1@MEGF9	ENST00000373930.3	intronic	hsa-novelmir-3140
chr9	+	124413919	chr9	+	121651640	p1@DAB2IP	ENST00000408936.3	intronic	hsa-novelmir-3142,hsa-novelmir-3143
chr9	-	125667562	chr9	-	122905283	p1@RC3H2	NM_001100588	intronic	hsa-novelmir-3145
chr9	+	125703299	chr9	+	122941020	p1@RABGAP1	ENST00000459903.1	intronic	hsa-novelmir-3146
chr9	-	126030865	chr9	-	123268586	p1@STRBP	curation	intronic	hsa-mir-600
chr9	-	126692405	chr9	-	123930126	p1@DENND1A	ENST00000373620.3	intronic	hsa-novelmir-3147,hsa-mir-7150,hsa-mir-601
chr9	+	127020230	chr9	+	124257951	p1@NEK6	ENST00000373600.3	intronic	hsa-novelmir-3150,hsa-novelmir-3151
chr9	-	127177718	chr9	-	124415439	p1@PSMB7	ENST00000259457.3	intronic	hsa-novelmir-3152
chr9	-	127269678	chr9	-	124507399	p1@NR5A1	NM_004959	intronic	hsa-novelmir-3154
chr9	+	127420717	chr9	+	124658438	p1@MIR181A2HG	NR_038975	intergenic	hsa-mir-181a-2,hsa-mir-181b-2
chr9	-	127533527	chr9	-	124771248	p2@NR6A1	ENST00000487099.2	intronic	hsa-novelmir-3155
chr9	+	127539412	chr9	+	124777133	p1@OLFML2A	NM_182487	intronic	hsa-novelmir-3156
chr9	-	128469487	chr9	-	125707208	p1@MAPKAP1	ENST00000350766.3	intronic	hsa-novelmir-3160
chr9	+	129089123	chr9	+	126326844	p1@FAM125B	NM_033446	intronic	hsa-novelmir-3162
chr9	+	129677061	chr9	+	126914782	p1@RALGPS1	ENST00000394022.3	intronic	hsa-novelmir-3165
chr9	+	130213789	chr9	+	127451510	p1@LRSAM1	ENST00000323301.4	intronic	hsa-novelmir-3167
chr9	-	130331347	chr9	-	127569068	p1@FAM129B	NM_022833	intronic	hsa-novelmir-3168
chr9	+	130374556	chr9	+	127612277	p1@STXBP1	ENST00000373302.3	intronic	hsa-novelmir-3169
chr9	-	130453199	chr9	-	127690920	p1@MIR3911	NR_037473	intergenic	hsa-mir-3911
chr9	+	130547846	chr9	+	127785567	p2@CDK9	ENST00000421939.1	intronic	hsa-mir-3960,hsa-mir-2861
chr9	-	130616937	chr9	-	127854658	p1@ENG	ENST00000344849.3	intronic	hsa-novelmir-3170
chr9	-	130639954	chr9	-	127877675	p1@AK1	ENST00000550992.1	intronic	hsa-mir-4672
chr9	-	130693095	chr9	-	127930816	p5@PIP5KL1	NM_001135219	intronic	hsa-novelmir-3171
chr9	-	130700174	chr9	-	127937895	p3@DPM2	NM_003863	intronic	hsa-novelmir-3172
chr9	-	130743268	chr9	-	127980989	p1@FAM102A	NM_001035254	intronic	hsa-novelmir-3175,hsa-novelmir-3174,hsa-novelmir-3173
chr9	-	130829599	chr9	-	128067320	p1@NAIF1	NM_197956	intronic	hsa-novelmir-3177
chr9	+	130922575	chr9	+	128160296	p1@C9orf16	ENST00000492588.1	intronic	hsa-novelmir-3178
chr9	+	130965658	chr9	+	128203379	p1@DNM1	ENST00000475805.1	intronic	hsa-novelmir-3179
chr9	-	131007255	chr9	-	128244976	p1@MIR3154	curation	intergenic	hsa-mir-3154,hsa-mir-199b
chr9	-	131038231	chr9	-	128275952	p1@GOLGA2	ENST00000609374.1	intronic	hsa-novelmir-3181
chr9	-	131084720	chr9	-	128322441	p1@TRUB2	NM_015679	intronic	hsa-novelmir-3182
chr9	-	131155608	chr9	-	128393329	p@chr9:131155600..131155614,-	ENST00000608502.1	intergenic	hsa-mir-219a-2
chr9	+	131314866	chr9	+	128552587	p1@SPTAN1	ENST00000358161.5	intronic	hsa-novelmir-3183
chr9	+	131549579	chr9	+	128787300	p1@TBC1D13	ENST00000539497.1	intronic	hsa-novelmir-3186
chr9	+	131644461	chr9	+	128882182	p1@LRRC8A	ENST00000372599.3	intronic	hsa-novelmir-3187
chr9	-	131940536	chr9	-	129178257	p1@IER5L	NM_203434	intronic	hsa-novelmir-3188
chr9	+	132094677	chr9	+	129332398	p1@ENST00000427109	ENST00000427109.1	intergenic	hsa-novelmir-3189
chr9	-	132404418	chr9	-	129642139	p1@ASB6	ENST00000277459.4	intronic	hsa-novelmir-3192
chr9	+	132597737	chr9	+	129835458	p1@USP20	ENST00000372429.3	intronic	hsa-mir-6855
chr9	-	132805446	chr9	-	130043167	p1@FNBP1	ENST00000355681.3	intronic	hsa-novelmir-3194
chr9	+	132816186	chr9	+	130053907	p1@GPR107	ENST00000493417.1	intronic	hsa-novelmir-3196
chr9	+	133454970	chr9	+	130579583	p1@FUBP3	NM_003934	intronic	hsa-mir-6856,hsa-novelmir-3197
chr9	+	133569167	chr9	+	130693780	p1@EXOSC2	ENST00000490641.1	intronic	hsa-novelmir-3198
chr9	+	133971918	chr9	+	131096531	p1@AIF1L	ENST00000372314.3	intronic	hsa-novelmir-3199,hsa-novelmir-3200
chr9	-	134152351	chr9	-	131276964	p1@FAM78A	ENST00000372271.3	intronic	hsa-novelmir-3201
chr9	-	134615463	chr9	-	131740076	p1@RAPGEF1	ENST00000372195.1	intronic	hsa-novelmir-3203,hsa-novelmir-3202
chr9	+	135037076	chr9	+	132161689	p1@NTNG2	NM_032536	intronic	hsa-novelmir-3204
chr9	-	135230373	chr9	-	132354986	p1@SETX	NM_015046	intronic	hsa-novelmir-3205
chr9	-	135753671	chr9	-	132878284	p1@AK8	ENST00000298545.3	intronic	hsa-novelmir-3206
chr9	-	135820003	chr9	-	132944616	p1@TSC1	ENST00000298552.3	intronic	hsa-novelmir-3207
chr9	+	135820470	chr9	+	132945083	p7@GFI1B	ENST00000372124.1	intronic	hsa-mir-548aw
chr9	+	135906387	chr9	+	133031000	p1@GTF3C5	ENST00000372099.6	intronic	hsa-mir-6877
chr9	-	136024564	chr9	-	133149177	p2@RALGDS	NM_001042368	intronic	hsa-novelmir-3209,hsa-novelmir-3208
chr9	-	136214951	chr9	-	133348096	p1@MED22	ENST00000471524.1	intronic	hsa-novelmir-3211
chr9	-	136223344	chr9	-	133356468	p1@SURF1	NM_003172	intronic	hsa-novelmir-3212
chr9	-	136857446	chr9	-	133992324	p2@VAV2	NM_003371	intronic	hsa-novelmir-3216,hsa-novelmir-3215
chr9	-	136933121	chr9	-	134067999	p1@BRD3	ENST00000303407.7	intronic	hsa-novelmir-3217
chr9	+	136943790	chr9	+	134078668	p@chr9:136943782..136943796,+	ENST00000605447.1	intergenic	hsa-novelmir-3218
chr9	+	137001210	chr9	+	134136088	p1@WDR5	NM_017588	intronic	hsa-novelmir-3219
chr9	+	137218306	chr9	+	134326460	p1@RXRA	NM_002957	intronic	hsa-mir-4669,hsa-novelmir-3220,hsa-novelmir-3222,hsa-novelmir-3223,hsa-novelmir-3224,hsa-novelmir-3225
chr9	-	138987132	chr9	-	136095286	p1@NACC2	NM_144653	intronic	hsa-novelmir-3229
chr9	+	139222028	chr9	+	136327572	p1@GPSM1	NM_001145638	intronic	hsa-novelmir-3232,hsa-novelmir-3233
chr9	-	139440500	chr9	-	136546048	p1@NOTCH1	ENST00000277541.6	intronic	hsa-novelmir-3236,hsa-novelmir-3235,hsa-mir-4673
chr9	+	139553849	chr9	+	136659397	p@chr9:139553832..139553915,+	NR_046367	intronic	hsa-novelmir-3238
chr9	+	139557369	chr9	+	136662917	p1@EGFL7	ENST00000308874.7	intronic	hsa-mir-126
chr9	-	139642977	chr9	-	136748525	p1@LCN6,p2@LCN10	NM_198946	intronic	hsa-mir-6722
chr9	+	139702400	chr9	+	136807948	p1@C9orf86	ENST00000484471.2	intronic	hsa-mir-4292,hsa-novelmir-3240
chr9	+	139745263	chr9	+	136850811	p3@MAMDC4	ENST00000485732.1	intronic	hsa-novelmir-3244
chr9	+	139780968	chr9	+	136886516	p1@TRAF2	ENST00000247668.2	intronic	hsa-mir-4479,hsa-novelmir-3245,hsa-novelmir-3246
chr9	+	139886886	chr9	+	136992434	p1@C9orf142	ENST00000481187.1	intronic	hsa-novelmir-3248
chr9	-	139922689	chr9	-	137028237	p1@ABCA2	ENST00000341511.6	intronic	hsa-novelmir-3250,hsa-novelmir-3249
chr9	-	140009181	chr9	-	137114729	p1@DPP7	ENST00000371579.2	intronic	hsa-novelmir-3251
chr9	-	140063883	chr9	-	137169431	p1@MIR3621	NM_001013653	intronic	hsa-mir-3621
chr9	+	140100155	chr9	+	137205703	p1@NDOR1	ENST00000427047.2	intronic	hsa-novelmir-3252
chr9	-	140317614	chr9	-	137423162	p1@EXD3	NM_017820	intronic	hsa-novelmir-3253
chr9	+	140317697	chr9	+	137423245	p3@NOXA1	ENST00000341349.2	intronic	hsa-novelmir-3254
chr9	-	140353786	chr9	-	137459334	p1@NELF	NM_001130971	intronic	hsa-mir-7114
chr9	+	140513463	chr9	+	137619011	p1@EHMT1	ENST00000460843.1	intronic	hsa-novelmir-3257,hsa-novelmir-3258,hsa-novelmir-3259
chr9	+	140638358	chr9	+	137743906	p4@EHMT1	ENST00000462942.1	intronic	hsa-mir-602
chr9	+	140772234	chr9	+	137877782	p1@CACNA1B	NM_000718	intronic	hsa-novelmir-3260
chr10	+	181395	chr10	+	135455	p1@ZMYND11	NM_001202464	intronic	hsa-novelmir-3261
chr10	-	735608	chr10	-	689668	p1@DIP2C	NM_014974	intronic	hsa-novelmir-3264,hsa-novelmir-3263,hsa-novelmir-3262,hsa-mir-5699
chr10	-	977644	chr10	-	931704	p1@LARP4B	ENST00000406525.2	intronic	hsa-novelmir-3265
chr10	+	3109740	chr10	+	3067548	p1@PFKP	NM_002627	intronic	hsa-novelmir-3270,hsa-novelmir-3271
chr10	+	4986319	chr10	+	4944127	p@chr10:4986313..4986326,+	ENST00000434459.2	intronic	hsa-novelmir-3278
chr10	+	5454548	chr10	+	5412585	p2@NET1	NM_001047160	intronic	hsa-novelmir-3280
chr10	+	5726801	chr10	+	5684838	p1@FAM208B	NM_017782	intronic	hsa-novelmir-3282
chr10	-	5855393	chr10	-	5813430	p1@GDI2	ENST00000380132.4	intronic	hsa-novelmir-3284,hsa-novelmir-3283
chr10	-	6104272	chr10	-	6062309	p1@IL2RA	ENST00000379954.1	intronic	hsa-novelmir-3285
chr10	+	6186884	chr10	+	6144921	p2@PFKFB3	ENST00000536985.1	intronic	hsa-mir-3155a
chr10	-	6622238	chr10	-	6580276	p1@PRKCQ	ENST00000397176.2	intronic	hsa-novelmir-3286
chr10	-	7452996	chr10	-	7411034	p@chr10:7452947..7453017,-	NM_001029880	intronic	hsa-novelmir-3288
chr10	-	7708927	chr10	-	7666964	p1@ITIH5	ENST00000256861.6	intronic	hsa-novelmir-3289
chr10	+	11207447	chr10	+	11165484	p1@CELF2	ENST00000609870.1	intronic	hsa-novelmir-3293,hsa-novelmir-3294
[truncated: 2,120 more rows]

## Sheet: TableS12b
Primary miRNAs, mouse, after manual curation
Chromosome (mm9)	Strand (mm9)	TSS (mm9)	Chromosome (mm10)	Strand (mm10)	TSS (mm10)	Promoter name	Primary microRNA	Intronic/intergenic	Pre-microRNAs
chr1	-	16646965	chr1	-	16656884	p1@LOC100045866,p1@Tceb1	ENSMUST00000188641.3	intronic	mmu-novelmir-2
chr1	+	20660155	chr1	+	20670074	p@chr1:20660147..20660162,+	ENSMUST00000227082.1	intergenic	mmu-mir-206,mmu-mir-133b
chr1	-	20810306	chr1	-	20820225	p1@Mcm3	NM_008563	intronic	mmu-novelmir-3
chr1	+	23263118	chr1	+	23256279	p@chr1:23263104..23263128,+	curation	intergenic	mmu-mir-30a,mmu-mir-30c-2
chr1	+	33964744	chr1	+	33907899	p4@Dst	ENSMUST00000194011.2	intronic	mmu-novelmir-4
chr1	+	34068440	chr1	+	34011595	p1@Dst	ENSMUST00000097786.6	intronic	mmu-mir-6896,mmu-novelmir-5
chr1	-	34490132	chr1	-	34433287	p1@Mir5103	ENSMUST00000192173.1	intergenic	mmu-mir-5103
chr1	-	36301117	chr1	-	36244272	p1@Uggt1	NM_198899	intronic	mmu-mir-6897
chr1	-	36425977	chr1	-	36369132	p1@4632411B12Rik	ENSMUST00000185912.3	intronic	mmu-mir-6898
chr1	-	38186511	chr1	-	38129666	p1@Rev1	NM_019570	intronic	mmu-novelmir-7
chr1	-	38721800	chr1	-	38664955	p1@Aff3	XM_001477293	intronic	mmu-novelmir-8
chr1	-	39535561	chr1	-	39478716	p1@Tbc1d8	ENSMUST00000193823.1	intronic	mmu-novelmir-10
chr1	-	39609058	chr1	-	39552213	p5@Rnf149	ENSMUST00000146314.1	intergenic	mmu-novelmir-11
chr1	+	39957785	chr1	+	39900940	p1@Map4k4	ENSMUST00000168431.3	intronic	mmu-novelmir-12
chr1	+	45368476	chr1	+	45311631	p1@Col3a1	NM_009930	intronic	mmu-novelmir-13
chr1	-	55084239	chr1	-	55027395	p1@Sf3b1	ENSMUST00000027127.10	intronic	mmu-novelmir-14
chr1	-	59294047	chr1	-	59237203	p1@Als2	NM_028717	intronic	mmu-novelmir-15
chr1	-	60623557	chr1	-	60566713	p1@Raph1	XM_001479477	intronic	mmu-novelmir-16
chr1	-	64168007	chr1	-	64121433	p1@Klf7	NM_033563	intronic	mmu-mir-6899
chr1	-	65225640	chr1	-	65179066	p1@Idh1	NM_010497	intronic	mmu-novelmir-17
chr1	+	66221879	chr1	+	66175305	p1@Mtap2	ENSMUST00000114017.4	intronic	mmu-novelmir-18
chr1	+	72283033	chr1	+	72236459	p1@ENSMUST00000147711,p1@uc011wmt.1	ENSMUST00000181973.1	intergenic	mmu-novelmir-19
chr1	-	73911021	chr1	-	73864447	p1@6030407O03Rik	ENSMUST00000189514.1	intergenic	mmu-mir-6351
chr1	+	74438250	chr1	+	74391676	p1@Ctdsp1	NM_153088	intronic	mmu-mir-26b
chr1	-	74552399	chr1	-	74505825	p1@Usp37	ENSMUST00000044260.7	intronic	mmu-novelmir-20
chr1	-	74947553	chr1	-	74900979	p@chr1:74947550..74947553,-	curation	intergenic	mmu-mir-375
chr1	-	75188516	chr1	-	75191942	p1@Atg9a	ENSMUST00000189702.3	intronic	mmu-novelmir-21
chr1	+	76485711	chr1	+	76489136	p1@Gm17751	ENSMUST00000185857.1	intergenic	mmu-mir-6343
chr1	-	77511662	chr1	-	77515087	p1@Epha4	ENSMUST00000189934.1	intronic	mmu-novelmir-22,mmu-mir-6352
chr1	-	79758284	chr1	-	79761709	p1@Wdfy1	ENSMUST00000186464.1	intronic	mmu-novelmir-23
chr1	-	84281176	chr1	-	84284601	p1@Pid1	NM_001003948	intronic	mmu-mir-6353
chr1	-	88255939	chr1	-	86359364	p1@Ncl	ENSMUST00000185676.3	intronic	mmu-mir-3535
chr1	+	89652631	chr1	+	87756056	p1@Atg16l1	NM_029846	intronic	mmu-novelmir-26
chr1	-	90598707	chr1	-	88702132	p1@Arl4c	NM_177305	intronic	mmu-novelmir-27
chr1	-	94370354	chr1	-	92473777	p1@Ndufa10	NM_024197	intronic	mmu-mir-6900
chr1	+	94728278	chr1	+	92831701	p1@Gpc1	NM_016696	intronic	mmu-mir-149
chr1	+	95132418	chr1	+	93235841	p1@Sned1	NM_172463	intronic	mmu-mir-6901
chr1	+	95240230	chr1	+	93343653	p1@Ppp1r7	ENSMUST00000185498.3	intronic	mmu-mir-6902,mmu-mir-6345
chr1	+	95700552	chr1	+	93803975	p1@Ing5	ENSMUST00000188402.1	intronic	mmu-novelmir-28
chr1	-	108610584	chr1	-	106714007	p2@Bcl2	ENSMUST00000112751.1	intronic	mmu-mir-3473f
chr1	+	120286008	chr1	+	118389431	p1@Clasp1	ENSMUST00000190733.3	intronic	mmu-novelmir-30
chr1	-	121401202	chr1	-	119504625	p1@Ralb	NM_022327	intronic	mmu-novelmir-31
chr1	-	122017594	chr1	-	120121017	p1@Dbi	ENSMUST00000132118.1	intronic	mmu-novelmir-32
chr1	+	129670794	chr1	+	127774217	p1@Ccnt2	NM_028399	intronic	mmu-novelmir-34
chr1	+	129999923	chr1	+	128103346	p1@R3hdm1	ENSMUST00000036288.7	intronic	mmu-mir-128-1
chr1	+	133904197	chr1	+	132007620	p1@Elk4	ENSMUST00000086556.8	intronic	mmu-novelmir-35,mmu-novelmir-36
chr1	+	134088019	chr1	+	132191442	p4@Lemd1	ENSMUST00000188169.3	intronic	mmu-mir-135b
chr1	+	134097541	chr1	+	132200964	p@chr1:134097530..134097552,+	ENSMUST00000189062.1	intronic	mmu-novelmir-37
chr1	-	134439448	chr1	-	132542871	p1@Cntn2	ENSMUST00000190601.3	intronic	mmu-novelmir-38
chr1	-	134921928	chr1	-	133025351	p1@Mdm4	ENSMUST00000186617.3	intronic	mmu-novelmir-39
chr1	-	135697585	chr1	-	133801008	p1@Atp2b4	ENSMUST00000143567.4	intronic	mmu-mir-6903
chr1	+	136352108	chr1	+	134455531	p1@Klhl12	ENSMUST00000112232.4	intronic	mmu-novelmir-41
chr1	-	137482354	chr1	-	135585777	p1@Nav1	NM_173437	intronic	mmu-mir-1231
chr1	+	139795166	chr1	+	137898589	p@chr1:139795137..139795194,+	XM_001480013	intronic	mmu-mir-181a-1,mmu-mir-181b-1
chr1	+	142142295	chr1	+	140245718	p1@Kcnt2	ENSMUST00000120709.4	intronic	mmu-novelmir-42
chr1	+	153275778	chr1	+	151428648	p1@1190005F20Rik	NM_026876	intronic	mmu-mir-7682
chr1	-	155033177	chr1	-	153186047	p@chr1:155033141..155033186,-	ENSMUST00000185356.3	intronic	mmu-novelmir-45
chr1	+	157882857	chr1	+	156035727	p1@Tor1aip2	ENSMUST00000111754.5	intronic	mmu-novelmir-46
chr1	-	158404371	chr1	-	156474240	p2@Soat1	NM_009230	intronic	mmu-novelmir-47
chr1	-	159342726	chr1	-	157412595	p1@Rasal2	ENSMUST00000078308.9	intronic	mmu-novelmir-48
chr1	+	160292487	chr1	+	158362356	p1@Astn1	NM_007495	intronic	mmu-mir-488
chr1	+	161162331	chr1	+	159232200	p1@LOC100504800,p1@Rfwd2	NM_011931	intronic	mmu-mir-1843b
chr1	-	162722981	chr1	-	160792850	p1@Rabgap1l	NM_013862	intronic	mmu-mir-1927
chr1	+	162836567	chr1	+	160906436	p1@Rc3h1	ENSMUST00000161609.4	intronic	mmu-novelmir-49
chr1	+	164147795	chr1	+	162217664	p1@Dnm3os	NR_002870	intergenic	mmu-mir-199a-2,mmu-mir-214
chr1	-	167390583	chr1	-	165460452	p1@Dcaf6	XM_976438	intronic	mmu-novelmir-50
chr1	-	170362281	chr1	-	168432150	p1@Pbx1	ENSMUST00000072863.5	intronic	mmu-novelmir-52
chr1	-	172797899	chr1	-	170867768	p1@Atf6	NM_001081304	intronic	mmu-novelmir-53
chr1	-	173579104	chr1	-	171648973	p1@Slamf7	ENSMUST00000192024.2	intronic	mmu-mir-7683
chr1	-	173957417	chr1	-	172027286	p1@Vangl2	ENSMUST00000027837.9	intronic	mmu-novelmir-54
chr1	-	174228130	chr1	-	172297999	p1@Atp1a2	NM_178405	intronic	mmu-novelmir-55
chr1	+	177810929	chr1	+	175880798	p1@Exo1	NM_012012	intronic	mmu-novelmir-57
chr1	-	178744215	chr1	-	176814084	p1@Cep170	ENSMUST00000195717.2	intronic	mmu-mir-350
chr1	+	182499052	chr1	+	180568921	p1@Parp1	ENSMUST00000027777.8	intronic	mmu-mir-6904
chr1	-	182947639	chr1	-	181017508	p1@Ephx1	NM_010145	intronic	mmu-novelmir-58
chr1	+	185858339	chr1	+	184034460	p1@Dusp10	NM_022019	intronic	mmu-novelmir-59
chr1	-	186669724	chr1	-	184845845	p1@Mosc2	NM_133684	intronic	mmu-mir-1981
chr1	+	187028018	chr1	+	185204139	p1@Rab3gap2	ENSMUST00000194740.2	intronic	mmu-mir-664
chr1	+	187136073	chr1	+	185312194	p1@Mir215	ENSMUST00000192375.1	intergenic	mmu-mir-194-1,mmu-mir-215
chr1	-	187153257	chr1	-	185329378	p1@Iars2,p1@LOC636969	ENSMUST00000027921.7	intronic	mmu-novelmir-60
chr1	-	190831719	chr1	-	189007840	p1@Kctd3	NM_172650	intronic	mmu-novelmir-62
chr1	-	191746161	chr1	-	189922282	p1@Smyd2	NM_026796	intronic	mmu-novelmir-63
chr1	-	192735634	chr1	-	190911755	p1@Rps6kc1	ENSMUST00000159624.4	intronic	mmu-novelmir-64
chr1	-	195336404	chr1	-	193510210	p1@Mir205	ENSMUST00000180420.2	intergenic	mmu-mir-205
chr1	+	196446020	chr1	+	194619826	p1@Plxna2	ENSMUST00000027952.8	intronic	mmu-novelmir-67
chr1	+	196802576	chr1	+	194976382	p1@A330023F24Rik	curation	intergenic	mmu-mir-29b-2,mmu-mir-29c,mmu-novelmir-68
chr1	-	196918493	chr1	-	195092299	p2@Cd46	ENSMUST00000162650.4	intronic	mmu-novelmir-69
chr2	-	10002059	chr2	-	10080432	p1@Atp5c1	NM_020615	intronic	mmu-novelmir-71
chr2	+	10292137	chr2	+	10370510	p1@Sfmbt2	ENSMUST00000114862.4	intronic	mmu-novelmir-72
chr2	+	10294075	chr2	+	10372448	p2@Sfmbt2	ENSMUST00000041105.6	intronic	mmu-mir-669f,mmu-mir-669b,mmu-mir-669d,mmu-mir-669l,mmu-mir-669d-2,mmu-mir-297a-2,mmu-mir-466o,mmu-mir-466b-1,mmu-mir-669a-3,mmu-mir-467a-1,mmu-mir-466b-8,mmu-mir-669a-1,mmu-mir-467a-2,mmu-mir-466e,mmu-mir-669a-4,mmu-mir-466c-1,mmu-mir-669a-5,mmu-mir-467a-3,mmu-mir-466c-2,mmu-mir-669a-6,mmu-mir-467a-4,mmu-mir-466b-4,mmu-mir-669a-7,mmu-mir-467a-5,mmu-mir-466b-5,mmu-mir-669p-1,mmu-mir-467a-6,mmu-mi…
chr2	+	14151025	chr2	+	14229398	p1@Mrc1	ENSMUST00000028045.3	intronic	mmu-mir-511
chr2	+	17978763	chr2	+	18057136	p@chr2:17978755..17978772,+	NM_010804	intronic	mmu-mir-7655
chr2	+	17986212	chr2	+	18064585	p1@Mllt10	ENSMUST00000114671.4	intronic	mmu-novelmir-75
chr2	-	18314419	chr2	-	18392792	p1@Dnajc1	ENSMUST00000091418.8	intronic	mmu-novelmir-76
chr2	+	20890313	chr2	+	20968686	p1@Gm13375	ENSMUST00000126967.1	intergenic	mmu-novelmir-78
chr2	+	21289164	chr2	+	21367537	p4@Gpr158	ENSMUST00000055946.7	intronic	mmu-novelmir-79
chr2	+	22478074	chr2	+	22622554	p1@Gad2	NM_008078	intronic	mmu-mir-3967,mmu-novelmir-80
chr2	+	24909926	chr2	+	25054406	p1@Nelf	ENSMUST00000102931.7	intronic	mmu-mir-7664
chr2	+	25284193	chr2	+	25428673	p1@Abca2	NM_007379	intronic	mmu-mir-3087
chr2	+	25733377	chr2	+	25877857	p1@Kcnt1	NM_175462	intronic	mmu-novelmir-82
chr2	+	26171052	chr2	+	26315532	p1@Gpsm1	NM_153410	intronic	mmu-novelmir-83
chr2	-	26359344	chr2	-	26503824	p1@Notch1	ENSMUST00000028288.4	intronic	mmu-mir-6996
chr2	+	26439387	chr2	+	26583867	p1@Egfl7	NM_198725	intronic	mmu-mir-126a
chr2	-	26766144	chr2	-	26910624	p1@Med22	NM_011513	intronic	mmu-novelmir-84
chr2	-	27282521	chr2	-	27427001	p1@Vav2	ENSMUST00000056176.7	intronic	mmu-novelmir-85
chr2	-	27331151	chr2	-	27475631	p1@Brd3	ENSMUST00000138693.4	intronic	mmu-mir-7578
chr2	+	27741972	chr2	+	27886452	p1@Col5a1	ENSMUST00000028280.10	intronic	mmu-novelmir-86
chr2	-	28438509	chr2	-	28582989	p1@Gtf3c5	ENSMUST00000113889.5	intronic	mmu-novelmir-88
chr2	+	28555684	chr2	+	28700164	p1@Ak8	NM_001033874	intronic	mmu-mir-3088
chr2	-	28695835	chr2	-	28840315	p1@Gtf3c4	ENSMUST00000037117.5	intronic	mmu-novelmir-89
chr2	+	28980676	chr2	+	29125156	p1@Setx	NM_198033	intronic	mmu-novelmir-90
chr2	+	29682915	chr2	+	29827395	p1@Urm1	curation	intronic	mmu-mir-219b
chr2	-	29701830	chr2	-	29846310	p@chr2:29701822..29701836,-	XM_001477254	intronic	mmu-mir-219a-2
chr2	+	29821200	chr2	+	29965680	p1@Spna2	ENSMUST00000100225.5	intronic	mmu-mir-6997
chr2	+	30514245	chr2	+	30658725	p@chr2:30514224..30514252,+	ENSMUST00000146702.1	intergenic	mmu-novelmir-92
chr2	-	30997477	chr2	-	31141957	p1@Fnbp1	ENSMUST00000113564.5	intronic	mmu-novelmir-94
chr2	+	31428310	chr2	+	31572790	p1@Fubp3	NM_001033389	intronic	mmu-mir-6998
chr2	+	31829984	chr2	+	31974464	p1@Nup214	NM_172268	intronic	mmu-mir-7674,mmu-novelmir-96
chr2	+	32006641	chr2	+	32151121	p1@Prrc2b	ENSMUST00000069817.11	intronic	mmu-novelmir-97,mmu-novelmir-98
chr2	+	32173838	chr2	+	32318318	p2@Mir199b	curation	intergenic	mmu-mir-199b,mmu-mir-3154
chr2	+	32442608	chr2	+	32587088	p1@St6galnac4	ENSMUST00000102818.7	intronic	mmu-novelmir-99
chr2	+	32502169	chr2	+	32646649	p1@Eng	ENSMUST00000167841.4	intronic	mmu-mir-1954
chr2	-	32549652	chr2	-	32694132	p1@Fpgs	NM_010236	intronic	mmu-mir-8093
chr2	-	32568601	chr2	-	32713081	p2@Cdk9	ENSMUST00000123170.4	intronic	mmu-mir-3960,mmu-mir-2861
chr2	+	33071589	chr2	+	33216069	p1@Angptl2	ENSMUST00000004208.5	intronic	mmu-novelmir-100
chr2	+	34965038	chr2	+	35109518	p1@Cep110	ENSMUST00000156933.4	intronic	mmu-novelmir-101
chr2	-	35192496	chr2	-	35336976	p1@Stom	ENSMUST00000028241.6	intronic	mmu-novelmir-102
chr2	-	37558834	chr2	-	37703314	p1@Strbp	ENSMUST00000135488.1	intronic	mmu-mir-5128
chr2	+	38367241	chr2	+	38511721	p1@Nek6	ENSMUST00000112902.4	intronic	mmu-novelmir-104
chr2	+	38678864	chr2	+	38823344	p1@ENSMUST00000151229	curation	intergenic	mmu-mir-181a-2,mmu-mir-181b-2
chr2	-	42508563	chr2	-	42653043	p1@Lrp1b	ENSMUST00000138700.4	intronic	mmu-mir-6336
chr2	-	44968522	chr2	-	45113002	p1@Zeb2	ENSMUST00000176732.4	intronic	mmu-novelmir-105,mmu-mir-5129
chr2	-	60047911	chr2	-	60209854	p2@Baz2b	ENSMUST00000144893.1	intronic	mmu-novelmir-107
chr2	-	63936064	chr2	-	64098007	p1@Fign	NM_021716	intronic	mmu-novelmir-108
chr2	+	67403762	chr2	+	67565705	p@chr2:67403737..67403830,+	ENSMUST00000188614.1	intronic	mmu-mir-7224,mmu-mir-6335
chr2	-	68310093	chr2	-	68472036	p1@Stk39	NM_016866	intronic	mmu-novelmir-109
chr2	+	73109990	chr2	+	73271933	p1@Sp9	ENSMUST00000147133.1	intronic	mmu-novelmir-110
chr2	+	73150716	chr2	+	73312659	p1@Scrn3	ENSMUST00000154158.4	intronic	mmu-novelmir-111
chr2	-	73498442	chr2	-	73660385	p1@Chn1	ENSMUST00000154258.4	intronic	mmu-novelmir-112
chr2	-	73730685	chr2	-	73892628	p1@Atf2,p1@LOC100047997	NM_009715	intronic	mmu-novelmir-113
chr2	+	74549986	chr2	+	74711929	p1@Hoxd3	ENSMUST00000144040.5	intronic	mmu-mir-10b
chr2	+	76208052	chr2	+	76369995	p1@Rbm45	NM_153405	intronic	mmu-novelmir-114
chr2	+	80155868	chr2	+	80315711	p1@Dnajc10	NM_024181	intronic	mmu-novelmir-115
chr2	-	80469796	chr2	-	80629639	p1@ENSMUST00000099968,p1@ENSMUST00000118989	XM_001476458	intronic	mmu-mir-684-1
chr2	+	83652795	chr2	+	83812638	p1@Fam171b	ENSMUST00000051454.3	intronic	mmu-novelmir-116
chr2	-	84583913	chr2	-	84743756	p@chr2:84583906..84583921,-	curation	intergenic	mmu-mir-130a
chr2	+	91043076	chr2	+	91202919	p1@Acp2	ENSMUST00000155418.1	intronic	mmu-novelmir-118
chr2	+	91490378	chr2	+	91650221	p1@Arhgap1	ENSMUST00000090614.7	intronic	mmu-novelmir-119
chr2	-	91803796	chr2	-	91963639	p1@Dgkz	ENSMUST00000028667.6	intronic	mmu-mir-6999
chr2	+	92023970	chr2	+	92183813	p1@Phf21a	ENSMUST00000111294.4	intronic	mmu-mir-1955,mmu-novelmir-120
chr2	-	92229428	chr2	-	92389271	p@chr2:92229405..92229492,-	ENSMUST00000111279.5	intronic	mmu-mir-7000
chr2	-	93174644	chr2	-	93334487	p1@Tspan18	ENSMUST00000111265.5	intronic	mmu-novelmir-121
chr2	-	93302557	chr2	-	93462400	p1@Cd82	ENSMUST00000099696.4	intronic	mmu-mir-7001
chr2	-	94104882	chr2	-	94264725	p1@ENSMUST00000129661	ENSMUST00000211430.1	intergenic	mmu-novelmir-122,mmu-mir-670,mmu-mir-129-2
chr2	-	104334680	chr2	-	104494523	p1@Hipk3	ENSMUST00000028600.10	intronic	mmu-mir-1902
chr2	-	104552290	chr2	-	104712133	p1@Tcp11l1	ENSMUST00000111118.4	intronic	mmu-novelmir-124
chr2	+	112333113	chr2	+	112492956	p1@Aven	NM_028844	intronic	mmu-novelmir-125
chr2	-	114001043	chr2	-	114175307	p1@Aqr	NM_009702	intronic	mmu-mir-7002
chr2	+	115407430	chr2	+	115581694	p1@BC052040	ENSMUST00000166472.4	intronic	mmu-mir-1951
chr2	+	119500820	chr2	+	119675084	p1@Rtf1	XM_283757	intronic	mmu-novelmir-127,mmu-novelmir-128
chr2	+	119798151	chr2	+	119972415	p1@Mapkbp1	NM_011941	intronic	mmu-mir-7665
chr2	+	120454857	chr2	+	120629121	p1@ENSMUST00000150912	XM_001004201	intronic	mmu-novelmir-129
chr2	+	121332509	chr2	+	121506773	p1@Wdr76	ENSMUST00000099473.6	intronic	mmu-novelmir-131
chr2	-	121632799	chr2	-	121807063	p1@Frmd5	NM_172673	intronic	mmu-novelmir-132
chr2	+	122463651	chr2	+	122637915	p1@AA467197	ENSMUST00000175727.1	intronic	mmu-mir-147
chr2	+	122564298	chr2	+	122738562	p1@Pldn	ENSMUST00000148460.4	intronic	mmu-novelmir-133
chr2	+	123915718	chr2	+	124089982	p2@Sema6d	ENSMUST00000103241.4	intronic	mmu-novelmir-134
chr2	+	125684934	chr2	+	125859198	p3@Galk2	NM_175154	intronic	mmu-novelmir-135
chr2	-	126758771	chr2	-	126933035	p1@2010106G01Rik	NM_023220	intronic	mmu-novelmir-137,mmu-mir-3473g
chr2	-	130005102	chr2	-	130179366	p1@Snrpb	NM_009225	intronic	mmu-novelmir-138
chr2	-	130867227	chr2	-	131041491	p1@Gfra4	ENSMUST00000136569.1	intronic	mmu-mir-6973b
chr2	+	131088231	chr2	+	131262495	p1@Pank2	NM_153501	intronic	mmu-mir-103-2
chr2	+	132512687	chr2	+	132686951	p1@1110034G24Rik	ENSMUST00000061891.7	intronic	mmu-novelmir-139
chr2	+	136717951	chr2	+	136892215	p1@2210009G21Rik	ENSMUST00000099311.5	intronic	mmu-novelmir-140
chr2	-	151805912	chr2	-	151980176	p1@Fam110a	ENSMUST00000062047.5	intronic	mmu-novelmir-145
chr2	+	152673766	chr2	+	152848030	p1@Tpx2	NM_028109	intronic	mmu-mir-5622
chr2	+	154262232	chr2	+	154436496	p1@Cbfa2t2	ENSMUST00000045270.11	intronic	mmu-novelmir-147
chr2	+	155439403	chr2	+	155613667	p@chr2:155439381..155439430,+	ENSMUST00000092995.5	intronic	mmu-mir-499
chr2	-	155555146	chr2	-	155729410	p1@Edem2	NM_145537	intronic	mmu-novelmir-149
chr2	-	155756011	chr2	-	155930275	p3@Uqcc	ENSMUST00000162749.4	intronic	mmu-novelmir-150
chr2	+	156022492	chr2	+	156196756	p1@Phf20	ENSMUST00000152617.4	intronic	mmu-novelmir-151
chr2	+	157105047	chr2	+	157279311	p1@Rpn2	ENSMUST00000127252.4	intronic	mmu-novelmir-153
chr2	-	157392069	chr2	-	157566333	p1@Blcap	ENSMUST00000109528.5	intronic	mmu-novelmir-154
chr2	+	158450658	chr2	+	158624922	p1@Actr5	NM_175419	intronic	mmu-mir-3474
chr2	+	158492903	chr2	+	158667167	p1@Ppp1r16b	ENSMUST00000045503.7	intronic	mmu-novelmir-155
chr2	+	162880403	chr2	+	163054667	p1@Mybl2	ENSMUST00000018005.6	intronic	mmu-mir-7003
chr2	-	163470824	chr2	-	163645088	p1@Serinc3	NM_012032	intronic	mmu-novelmir-157
chr2	-	164182028	chr2	-	164356292	p1@Slpi	ENSMUST00000109367.6	intronic	mmu-mir-7678
chr2	-	165710146	chr2	-	165884646	p1@Zmynd8	ENSMUST00000152682.4	intronic	mmu-novelmir-159
chr2	-	165981156	chr2	-	166155656	p1@Sulf2	NM_028072	intronic	mmu-novelmir-160
chr2	-	166539265	chr2	-	166713765	p1@Prex1	NM_177782	intronic	mmu-novelmir-161
chr2	+	166631090	chr2	+	166805590	p1@Arfgef2	ENSMUST00000099078.6	intronic	mmu-novelmir-162
chr2	-	167014297	chr2	-	167188797	p3@Kcnb1	NM_008420	intronic	mmu-novelmir-163
chr2	-	167979997	chr2	-	168154497	p1@E130018N17Rik	ENSMUST00000129713.1	intergenic	mmu-novelmir-164
chr2	+	168056122	chr2	+	168230622	p1@Mocs3	XM_130596	intronic	mmu-novelmir-165
chr2	-	168567458	chr2	-	168741958	p1@Atp9a	ENSMUST00000109176.4	intronic	mmu-mir-7004
chr2	+	172196182	chr2	+	172370682	p2@Cstf1	ENSMUST00000151511.4	intronic	mmu-novelmir-166
chr2	-	173044398	chr2	-	173218897	p1@Zbp1	ENSMUST00000146802.1	intronic	mmu-novelmir-167
chr2	-	173102034	chr2	-	173276533	p1@Pmepa1	NM_022995	intronic	mmu-novelmir-168
chr2	+	173563086	chr2	+	173737585	p1@Vapb	NM_019806	intronic	mmu-novelmir-169
chr2	+	174109821	chr2	+	174284320	p3@Gnas	NM_022000	intronic	mmu-novelmir-171
chr2	+	174153258	chr2	+	174327757	p2@Gnas	ENSMUST00000133356.4	intronic	mmu-novelmir-172
chr2	+	174155620	chr2	+	174330119	p1@Gnas	ENSMUST00000109084.4	intronic	mmu-novelmir-173
chr2	-	179711407	chr2	-	179976702	p1@Taf4a	NM_001081092	intronic	mmu-novelmir-174
chr2	+	179777456	chr2	+	180042751	p1@Ss18l1	NM_178750	intronic	mmu-novelmir-175
chr2	-	179960566	chr2	-	180225861	p1@Lama5	NM_001081171	intronic	mmu-novelmir-176,mmu-mir-7005
chr2	+	179992122	chr2	+	180257417	p1@Gm5963,p1@Rps21	ENSMUST00000125301.4	intronic	mmu-mir-3091
chr2	+	180120312	chr2	+	180385607	p1@Gm6307,p1@Mir1a-1	XM_896994	intronic	mmu-mir-1a-1,mmu-mir-133a-2
chr2	+	180627834	chr2	+	180893129	p@chr2:180627826..180627843,+	curation	intergenic	mmu-mir-124-3
chr2	-	180655650	chr2	-	180920945	p1@Ythdf1	ENSMUST00000037299.11	intronic	mmu-novelmir-178
chr2	-	180976697	chr2	-	181241992	p1@BC006779	ENSMUST00000121484.1	intronic	mmu-novelmir-179
chr2	+	181100130	chr2	+	181365425	p2@Zgpat	NM_001048148	intronic	mmu-novelmir-180
chr2	-	181327469	chr2	-	181592764	p1@Znf512b	ENSMUST00000108789.5	intronic	mmu-mir-7006
chr3	+	5218658	chr3	+	5218658	p1@Zfhx4	NM_030708	intronic	mmu-novelmir-182
chr3	+	17689943	chr3	+	17789943	p1@2610100L16Rik	ENSMUST00000189868.3	intergenic	mmu-mir-124-2
chr3	-	19935302	chr3	-	20035302	p1@Hps3	ENSMUST00000108321.1	intronic	mmu-novelmir-186
chr3	-	20142080	chr3	-	20242181	p1@Cpa3	ENSMUST00000001921.2	intronic	mmu-mir-7007
chr3	-	27610248	chr3	-	27711326	p1@Fndc3b	ENSMUST00000191684.1	intronic	mmu-mir-3092
chr3	+	28162246	chr3	+	28263324	p1@Tnik	ENSMUST00000161234.4	intronic	mmu-mir-466q
chr3	+	28981485	chr3	+	29082563	p1@Egfem1	XM_130829	intronic	mmu-mir-551b,mmu-mir-21b
chr3	+	30894725	chr3	+	30995803	p1@Prkci	NM_008857	intronic	mmu-mir-7008
chr3	+	34459300	chr3	+	34560378	p1@Sox2ot	ENSMUST00000197977.1	intergenic	mmu-mir-1897
chr3	+	36050013	chr3	+	36151091	p1@D3Ertd254e	XM_001475091	intronic	mmu-novelmir-188
chr3	-	36374587	chr3	-	36475665	p1@Anxa5	ENSMUST00000199478.1	intronic	mmu-mir-7009
chr3	+	41359654	chr3	+	41555732	p3@Phf17	ENSMUST00000026865.11	intronic	mmu-novelmir-189
chr3	-	50247508	chr3	-	50443586	p1@Slc7a11	ENSMUST00000029297.5	intronic	mmu-novelmir-190
chr3	-	51364549	chr3	-	51560627	p1@Setd7	NM_080793	intronic	mmu-novelmir-191
chr3	-	55987672	chr3	-	56183750	p1@Nbea	ENSMUST00000029374.7	intronic	mmu-novelmir-192
chr3	-	61168307	chr3	-	61364385	p@chr3:61168300..61168312,-	ENSMUST00000066298.2	intronic	mmu-novelmir-193
chr3	+	68808918	chr3	+	69004996	p1@Smc4	ENSMUST00000107803.3	intronic	mmu-mir-15b,mmu-mir-16-2
chr3	-	68930969	chr3	-	69127047	p2@Kpna4	NM_008467	intronic	mmu-novelmir-195
chr3	+	69120852	chr3	+	69316930	p1@Ppm1l	NM_178726	intronic	mmu-novelmir-196
chr3	-	69402783	chr3	-	69598861	p1@B3galnt1	NM_020026	intronic	mmu-novelmir-197
chr3	-	79646831	chr3	-	79842909	p1@Tmem144	ENSMUST00000194338.1	intronic	mmu-novelmir-198
chr3	-	80606615	chr3	-	80802693	p1@Gria2	NM_001083806	intronic	mmu-novelmir-199
chr3	-	81949710	chr3	-	82145788	p1@Gucy1a3	ENSMUST00000048976.7	intronic	mmu-mir-7010
chr3	+	84619660	chr3	+	84815738	p8@Fbxw7	ENSMUST00000151410.1	intronic	mmu-novelmir-200
chr3	-	87572865	chr3	-	87768943	p1@Pear1	ENSMUST00000172621.4	intronic	mmu-novelmir-202
chr3	+	88018407	chr3	+	88214485	p1@Mir3093	ENSMUST00000181356.1	intergenic	mmu-mir-3093,mmu-mir-9-1,mmu-novelmir-204
chr3	-	88258770	chr3	-	88454848	p4@Sema4a	NM_013658	intronic	mmu-mir-7011
chr3	+	88520786	chr3	+	88716864	p1@Rit1	NM_009069	intronic	mmu-novelmir-206
chr3	+	88660392	chr3	+	88856470	p@chr3:88660391..88660395,+	ENSMUST00000081695.10	intronic	mmu-novelmir-207
chr3	-	88905857	chr3	-	89101935	p1@Fdps	NM_134469	intronic	mmu-novelmir-208
chr3	-	89031309	chr3	-	89227387	p1@Mir92b	curation	intergenic	mmu-mir-92b
chr3	-	89049768	chr3	-	89245846	p1@Trim46	ENSMUST00000143637.1	intronic	mmu-novelmir-209
chr3	+	89518972	chr3	+	89715050	p1@Adar	NM_001038587	intronic	mmu-novelmir-210
chr3	+	89534689	chr3	+	89730767	p2@Adar	NM_019655	intronic	mmu-novelmir-211
chr3	-	89856394	chr3	-	90052472	p1@Ubap2l	ENSMUST00000195995.1	intronic	mmu-mir-7669
chr3	+	90070436	chr3	+	90266514	p1@Dennd4b	ENSMUST00000098914.6	intronic	mmu-mir-7012,mmu-novelmir-213
chr3	+	94778862	chr3	+	94974940	p1@Pi4kb	ENSMUST00000107251.5	intronic	mmu-mir-7013,mmu-novelmir-215
chr3	-	94946276	chr3	-	95142354	p1@Tnfaip8l2	NM_027206	intronic	mmu-novelmir-216
chr3	-	95543490	chr3	-	95739567	p1@Ecm1	ENSMUST00000029753.9	intronic	mmu-mir-7014
chr3	-	96531396	chr3	-	96727473	p1@Polr3c	ENSMUST00000125183.1	intronic	mmu-novelmir-220
chr3	-	97571861	chr3	-	97767938	p2@Pde4dip	NM_001039376	intronic	mmu-mir-7225
chr3	+	100726371	chr3	+	100922448	p1@Trim45	ENSMUST00000037409.9	intronic	mmu-novelmir-222
chr3	-	100773586	chr3	-	100969663	p1@Ttf2	NM_001013026	intronic	mmu-novelmir-223
chr3	-	102008514	chr3	-	102204591	p1@Vangl1	NM_177545	intronic	mmu-novelmir-224
chr3	-	116373468	chr3	-	116670550	p@chr3:116373462..116373473,-	ENSMUST00000140672.2	intronic	mmu-novelmir-226
chr3	-	116415142	chr3	-	116712224	p1@Slc35a3	ENSMUST00000120120.4	intronic	mmu-novelmir-227
chr3	+	116564607	chr3	+	116861689	p1@Frrs1	NM_009146	intronic	mmu-novelmir-228
chr3	+	118133266	chr3	+	118430348	p@chr3:118133217..118133286,+	ENSMUST00000180774.1	intergenic	mmu-mir-137
chr3	+	121129437	chr3	+	121426519	p1@Cnn3	NM_028044	intronic	mmu-novelmir-230
chr3	-	121518114	chr3	-	121815196	p1@Abcd3	NM_008991	intronic	mmu-novelmir-231
chr3	-	121996670	chr3	-	122293752	p1@Mir760	ENSMUST00000199060.1	intergenic	mmu-mir-760
chr3	-	122322608	chr3	-	122619690	p1@Fnbp1l	ENSMUST00000162409.4	intronic	mmu-mir-7657
chr3	-	126928850	chr3	-	127225932	p2@Ank2	ENSMUST00000182610.4	intronic	mmu-novelmir-232
chr3	+	127248011	chr3	+	127545093	p1@Mir302b	curation	intergenic	mmu-mir-302b,mmu-mir-302c,mmu-mir-302a,mmu-mir-302d,mmu-mir-367
chr3	+	132347136	chr3	+	132684172	p1@Tbck	NM_173032	intronic	mmu-novelmir-233,mmu-novelmir-234
chr3	-	133903583	chr3	-	134240619	p1@Mir1895	ENSMUST00000180471.2	intergenic	mmu-mir-1895
chr3	+	134944287	chr3	+	135281323	p1@Bdh2	NM_027208	intronic	mmu-novelmir-236
chr3	+	138189389	chr3	+	138526425	p1@Mir1956	ENSMUST00000200020.1	intronic	mmu-mir-1956
chr3	-	138738193	chr3	-	139075229	p1@Rap1gds1	ENSMUST00000098574.5	intronic	mmu-novelmir-237
chr3	+	141128563	chr3	+	141465599	p1@Unc5c	ENSMUST00000151007.2	intronic	mmu-novelmir-238
chr3	-	141832192	chr3	-	142169228	p1@Bmpr1b	ENSMUST00000098568.4	intronic	mmu-novelmir-239
chr3	-	144383130	chr3	-	144720166	p1@Sh3glb1	ENSMUST00000199531.1	intronic	mmu-novelmir-240
chr3	+	157197361	chr3	+	157534397	p1@Zranb2	NM_017381	intronic	mmu-mir-186
chr3	-	157588027	chr3	-	157925063	p1@Cth	NM_145953	intronic	mmu-novelmir-243
chr4	-	4720460	chr4	-	4793313	p1@Impad1	NM_177730	intronic	mmu-novelmir-244
chr4	+	8617584	chr4	+	8690437	p1@Chd7	NM_001081417	intronic	mmu-novelmir-245,mmu-novelmir-246
chr4	-	15872521	chr4	-	15945374	p1@Decr1	ENSMUST00000150464.1	intronic	mmu-mir-6400
chr4	-	15940968	chr4	-	16013821	p1@Osgin2	ENSMUST00000148819.1	intronic	mmu-novelmir-247
chr4	-	25727593	chr4	-	25800446	p2@Fut9	XM_001475339	intronic	mmu-novelmir-250
chr4	+	32325716	chr4	+	32238741	p1@Bach2	ENSMUST00000108180.5	intronic	mmu-novelmir-251,mmu-novelmir-252
chr4	+	33397322	chr4	+	33310347	p1@Rngtt	ENSMUST00000029942.7	intronic	mmu-mir-8118
chr4	+	34562236	chr4	+	34614987	p1@Rars2	NM_181406	intronic	mmu-novelmir-255
chr4	-	36898765	chr4	-	36951732	p1@Lingo2	curation	intronic	mmu-mir-876,mmu-mir-873a
chr4	+	40669520	chr4	+	40722487	p1@Dnaja1	ENSMUST00000030118.6	intronic	mmu-mir-207
chr4	-	40801005	chr4	-	40853972	p1@B4galt1	NM_022305	intronic	mmu-mir-5123
chr4	+	40918022	chr4	+	40970989	p1@Nfx1	NM_023739	intronic	mmu-mir-3094
chr4	+	41082543	chr4	+	41135510	p1@Ube2r2	ENSMUST00000040008.3	intronic	mmu-novelmir-256
chr4	+	42087592	chr4	+	42216869	p1@ENSMUST00000120895	ENSMUST00000121728.2	intergenic	mmu-novelmir-257
chr4	-	43575276	chr4	-	43562404	p1@Tln1	ENSMUST00000030187.10	intronic	mmu-novelmir-258
chr4	-	44246777	chr4	-	44233905	p1@Rnf38	ENSMUST00000153116.1	intronic	mmu-mir-5106
chr4	+	44313828	chr4	+	44300956	p1@Melk	NM_010790	intronic	mmu-novelmir-259
chr4	-	44723573	chr4	-	44710701	p1@Pax5	ENSMUST00000014174.10	intronic	mmu-mir-5120
chr4	+	44956605	chr4	+	44943733	p1@ENSMUST00000154177	ENSMUST00000154177.1	intergenic	mmu-novelmir-260
chr4	+	46052127	chr4	+	46039255	p1@Tmod1	NM_021883	intronic	mmu-novelmir-261
chr4	+	46151619	chr4	+	46138747	p1@Ncbp1	ENSMUST00000030014.8	intronic	mmu-novelmir-262
chr4	+	46502191	chr4	+	46489319	p1@Nans	NM_053179	intronic	mmu-novelmir-264
chr4	-	48292443	chr4	-	48279571	p1@Erp44	ENSMUST00000030028.4	intronic	mmu-mir-1958
chr4	+	49072145	chr4	+	49059273	p1@E130309F12Rik	ENSMUST00000137884.1	intronic	mmu-novelmir-265
chr4	-	56960301	chr4	-	56947429	p1@D730040F13Rik	NM_175518	intronic	mmu-mir-32
chr4	-	58566078	chr4	-	58553206	p1@Lpar1	ENSMUST00000107571.4	intronic	mmu-mir-3095
chr4	-	62180930	chr4	-	62519896	p1@Alad	ENSMUST00000107444.4	intronic	mmu-novelmir-266
chr4	+	62876446	chr4	+	63215412	p1@Col27a1	NM_025685	intronic	mmu-mir-455
chr4	+	66488795	chr4	+	66827761	p2@Tlr4	ENSMUST00000143580.1	intronic	mmu-novelmir-267
chr4	-	76095683	chr4	-	76449779	p1@Ptprd	ENSMUST00000107289.5	intronic	mmu-novelmir-268
chr4	-	81088699	chr4	-	81442795	p1@Mpdz	NM_010820	intronic	mmu-novelmir-269
chr4	-	86876327	chr4	-	87230423	p1@Slc24a2	ENSMUST00000107157.5	intronic	mmu-novelmir-271
chr4	+	87740529	chr4	+	88094625	p1@BC057079	NM_001081184	intronic	mmu-mir-491
chr4	-	88584365	chr4	-	88938461	p@chr4:88584339..88584383,-	curation	intergenic	mmu-mir-31
chr4	-	91043161	chr4	-	91376470	p1@Elavl2	ENSMUST00000107120.4	intronic	mmu-mir-6402
chr4	+	94281235	chr4	+	94614544	p1@Ift74	ENSMUST00000030311.7	intronic	mmu-mir-872
chr4	-	101029146	chr4	-	101356541	p1@E130102H24Rik	XM_001472210	intronic	mmu-mir-101a
chr4	+	101927650	chr4	+	102255045	p4@Pde4b	ENSMUST00000106908.5	intronic	mmu-novelmir-272
chr4	+	102432957	chr4	+	102760352	p1@Sgip1	ENSMUST00000156596.4	intronic	mmu-novelmir-273
chr4	+	105988818	chr4	+	106316213	p1@Usp24	ENSMUST00000165709.4	intronic	mmu-novelmir-274
chr4	+	106584097	chr4	+	106911492	p1@Ssbp3	ENSMUST00000149926.4	intronic	mmu-novelmir-275
chr4	+	107040652	chr4	+	107368047	p1@Tmem48	ENSMUST00000149366.1	intronic	mmu-novelmir-276
chr4	-	107743939	chr4	-	108071334	p1@Scp2	ENSMUST00000044248.10	intronic	mmu-novelmir-277
chr4	+	108673291	chr4	+	109000686	p1@Nrd1	ENSMUST00000065977.7	intronic	mmu-mir-761
chr4	+	108952988	chr4	+	109280383	p1@Eps15	ENSMUST00000175776.4	intronic	mmu-novelmir-278
chr4	+	115410384	chr4	+	115737779	p1@4732418C07Rik	ENSMUST00000106522.5	intronic	mmu-novelmir-280
chr4	+	115511826	chr4	+	115839221	p1@Mknk1	ENSMUST00000144427.4	intronic	mmu-novelmir-281
chr4	+	116667941	chr4	+	116995336	p1@Hectd3	NM_175244	intronic	mmu-novelmir-282
chr4	+	117222978	chr4	+	117550373	p1@Eri3	ENSMUST00000037127.11	intronic	mmu-novelmir-283
chr4	-	117963974	chr4	-	118291369	p1@Ptprf	NM_011213	intronic	mmu-mir-7226
chr4	-	118109899	chr4	-	118437294	p1@Cdc20	NM_023223	intronic	mmu-novelmir-284
chr4	+	118293450	chr4	+	118620845	p1@Ebna1bp2	NM_026932	intronic	mmu-novelmir-285
chr4	+	118781409	chr4	+	119108804	p1@Slc2a1	ENSMUST00000134105.4	intronic	mmu-mir-1957a
chr4	-	120498396	chr4	-	120825791	p2@Nfyc	NM_008692	intronic	mmu-mir-30e,mmu-mir-30c-1
chr4	-	120689830	chr4	-	121017225	p1@Smap2	NM_133716	intronic	mmu-novelmir-286,mmu-mir-7015
chr4	+	123291176	chr4	+	123613933	p@chr4:123291172..123291176,+	XM_988025	intronic	mmu-mir-6398
chr4	-	124334555	chr4	-	124657312	p@chr4:124334531..124334562,-	ENSMUST00000184062.1	intergenic	mmu-novelmir-288
chr4	+	124392098	chr4	+	124714854	p1@Sf3a3	NM_029157	intronic	mmu-mir-697
chr4	+	124419108	chr4	+	124741864	p2@Inpp5b	ENSMUST00000153837.4	intronic	mmu-mir-698
chr4	+	124528021	chr4	+	124850777	p1@Yrdc	NM_153566	intronic	mmu-novelmir-289
chr4	+	125181322	chr4	+	125504078	p1@Ftl2	NM_008049	intronic	mmu-mir-692-2
chr4	+	126234257	chr4	+	126557013	p1@Clspn	ENSMUST00000123695.1	intronic	mmu-mir-7119
chr4	-	126645455	chr4	-	126968211	p3@Zmym4	ENSMUST00000106108.5	intronic	mmu-novelmir-293
chr4	+	126846457	chr4	+	127169213	p1@Dlgap3	ENSMUST00000046659.10	intronic	mmu-novelmir-294
chr4	+	127665244	chr4	+	127988000	p1@ENSMUST00000144298,p1@uc008uuy.1,p1@uc008uuz.1	ENSMUST00000144298.1	intronic	mmu-novelmir-295
chr4	-	129235616	chr4	-	129558372	p1@Lck	NM_010693	intronic	mmu-mir-8119
chr4	+	129277924	chr4	+	129600680	p1@2510006D16Rik	ENSMUST00000102591.6	intronic	mmu-novelmir-297
chr4	-	129318270	chr4	-	129641026	p1@Txlna	ENSMUST00000046425.12	intronic	mmu-novelmir-298
chr4	-	129374069	chr4	-	129696825	p1@Tmem39b	NM_199305	intronic	mmu-mir-7016
chr4	+	129725119	chr4	+	130047875	p1@Col16a1	ENSMUST00000097867.5	intronic	mmu-novelmir-299,mmu-novelmir-300
chr4	-	132352283	chr4	-	132796368	p1@BC013712	NM_001033308	intronic	mmu-novelmir-301
chr4	+	132686480	chr4	+	133130565	p1@Wasf2	ENSMUST00000084241.8	intronic	mmu-mir-7017
chr4	+	132925687	chr4	+	133369772	p1@Mir5122,p1@Slc9a1	NM_016981	intronic	mmu-mir-5122
chr4	-	133309897	chr4	-	133753982	p1@Arid1a	ENSMUST00000138473.2	intronic	mmu-mir-7227
chr4	-	133556797	chr4	-	134000882	p1@Dhdds	ENSMUST00000012262.8	intronic	mmu-novelmir-303
chr4	-	134260162	chr4	-	134704247	p1@Man1c1	NM_207237	intronic	mmu-mir-6403
chr4	-	134909061	chr4	-	135353146	p1@Srrm1	ENSMUST00000131373.4	intronic	mmu-novelmir-305
chr4	-	134989676	chr4	-	135433761	p1@Rcan3	NM_022980	intronic	mmu-mir-700
chr4	+	135699739	chr4	+	136143824	p1@Id3	NM_008321	intronic	mmu-novelmir-306
chr4	+	137024697	chr4	+	137468782	p1@Hspg2	ENSMUST00000030547.11	intronic	mmu-mir-7018
chr4	+	137549371	chr4	+	137993456	p1@Eif4g3	ENSMUST00000084214.8	intronic	mmu-mir-6399
chr4	-	137882186	chr4	-	138326271	p1@Pink1	NM_026880	intronic	mmu-mir-7019
chr4	+	139179013	chr4	+	139623098	p1@Aldh4a1	NM_175438	intronic	mmu-mir-7020
chr4	-	139523540	chr4	-	139967625	p2@ENSMUST00000158669	NM_173427	intronic	mmu-mir-2139
chr4	-	140616390	chr4	-	141060475	p@chr4:140616369..140616409,-	ENSMUST00000097816.5	intronic	mmu-novelmir-310,mmu-novelmir-309
chr4	-	140695673	chr4	-	141139758	p1@D4Ertd22e	ENSMUST00000102487.3	intronic	mmu-novelmir-312,mmu-novelmir-311
chr4	+	140857155	chr4	+	141301240	p1@Epha2	NM_010139	intronic	mmu-novelmir-314
chr4	-	142752009	chr4	-	143162106	p@chr4:142752000..142752037,-	ENSMUST00000105778.4	intronic	mmu-mir-7021
chr4	-	147526242	chr4	-	148152133	p2@Fbxo6	ENSMUST00000168503.4	intronic	mmu-mir-7022
chr4	-	148473933	chr4	-	149099824	p1@Pex14	ENSMUST00000148203.1	intronic	mmu-novelmir-316
chr4	-	148800726	chr4	-	149426617	p1@Ube4b	NM_022022	intronic	mmu-novelmir-317
chr4	+	148892345	chr4	+	149518236	p1@Ctnnbip1	ENSMUST00000030839.9	intronic	mmu-mir-5616
chr4	-	149072715	chr4	-	149698606	p1@Pik3cd	ENSMUST00000105688.6	intronic	mmu-mir-7023
chr4	+	149437661	chr4	+	150063552	p@chr4:149437658..149437662,+	curation	intergenic	mmu-mir-34a
chr4	+	149611333	chr4	+	150237224	p1@Eno1,p1@Gm5506,p1@LOC100045967,p1@LOC100503183	NM_023119	intronic	mmu-novelmir-318
chr4	+	151851852	chr4	+	152477743	p1@Nphp4	NM_153424	intronic	mmu-novelmir-321,mmu-novelmir-322
chr4	-	154795794	chr4	-	155421685	p1@ENSMUST00000145520,p1@uc008wdg.1	ENSMUST00000145520.2	intergenic	mmu-novelmir-323
chr4	+	155079221	chr4	+	155705112	p1@Ssu72	NM_026899	intronic	mmu-novelmir-324
chr4	+	155221566	chr4	+	155847457	p1@Dvl1	ENSMUST00000168552.1	intronic	mmu-novelmir-325
chr4	+	155266372	chr4	+	155892263	p1@Acap3	ENSMUST00000131168.4	intronic	mmu-novelmir-326
chr4	-	155433926	chr4	-	156059817	p1@ENSMUST00000138361	ENSMUST00000138361.1	intergenic	mmu-mir-429,mmu-mir-200b,mmu-mir-200a
chr4	-	155608904	chr4	-	156234795	p1@Klhl17	NM_198305	intronic	mmu-mir-7658
chr5	+	9266142	chr5	+	9266142	p1@9330182L06Rik	ENSMUST00000115348.5	intronic	mmu-mir-879
chr5	-	20387863	chr5	-	20882045	p1@Phtf2	NM_172992	intronic	mmu-novelmir-328
chr5	-	21151376	chr5	-	21645558	p1@Fbxl13	ENSMUST00000115234.1	intronic	mmu-novelmir-329
chr5	-	23218494	chr5	-	23712676	p1@AI506816	ENSMUST00000197153.1	intergenic	mmu-novelmir-330
chr5	+	23356418	chr5	+	23850600	p1@2700038G22Rik,p1@Snord93	ENSMUST00000197551.1	intergenic	mmu-novelmir-331
chr5	-	23536498	chr5	-	24030680	p1@Fam126a	NM_053090	intronic	mmu-novelmir-332
chr5	+	24092563	chr5	+	24586745	p1@Chpf2	ENSMUST00000088295.5	intronic	mmu-mir-671
chr5	+	28643731	chr5	+	28317191	p1@Rbm33	XM_355585	intronic	mmu-novelmir-335
chr5	+	30481832	chr5	+	30155292	p1@Hadhb,p1@LOC100504946	ENSMUST00000197109.1	intronic	mmu-mir-1960
chr5	+	30950300	chr5	+	30647927	p2@4930471M23Rik	ENSMUST00000062962.8	intronic	mmu-mir-5625
chr5	+	31357169	chr5	+	31054796	p1@Cad	NM_023525	intronic	mmu-novelmir-337,mmu-novelmir-338
chr5	+	31495663	chr5	+	31193290	p1@Snx17	NM_153680	intronic	mmu-novelmir-339
chr5	-	31504619	chr5	-	31202246	p1@Zfp513	NM_175311	intronic	mmu-novelmir-340
chr5	+	31916345	chr5	+	31613972	p1@Mrpl33	NM_025796	intronic	mmu-novelmir-343
chr5	-	31999988	chr5	-	31697615	p1@Rbks	NM_153196	intronic	mmu-mir-3473e
chr5	-	33653798	chr5	-	33311149	p2@ENSMUST00000174768	ENSMUST00000174768.1	intergenic	mmu-novelmir-344
chr5	-	33972248	chr5	-	33629599	p1@Fam53a	ENSMUST00000153696.4	intronic	mmu-novelmir-345
chr5	-	33994969	chr5	-	33652320	p1@Slbp	NM_009193	intronic	mmu-novelmir-346
chr5	-	34278899	chr5	-	33936250	p1@Whsc2	NM_011914	intronic	mmu-mir-7024
chr5	-	34530356	chr5	-	34187707	p1@Mxd4	NM_010753	intronic	mmu-novelmir-347
chr5	+	34679081	chr5	+	34336432	p1@Rnf4	NM_011278	intronic	mmu-novelmir-348
chr5	+	34712600	chr5	+	34369951	p1@Fam193a	ENSMUST00000180376.4	intronic	mmu-novelmir-349
chr5	+	34916498	chr5	+	34573849	p1@Add1	ENSMUST00000001108.7	intronic	mmu-mir-7036b
chr5	+	35292129	chr5	+	34949480	p1@Rgs12	NM_173402	intronic	mmu-mir-3097
chr5	-	39075993	chr5	-	38684754	p1@Zfp518b	NM_001081144	intronic	mmu-novelmir-350
chr5	-	42099381	chr5	-	41708142	p1@Rab28	NM_027295	intronic	mmu-novelmir-351
chr5	+	43624492	chr5	+	43233253	p2@Cpeb2	ENSMUST00000169035.4	intronic	mmu-novelmir-352
chr5	+	48374394	chr5	+	47983155	p1@Slit2	ENSMUST00000033967.11	intronic	mmu-mir-218-1
chr5	+	50608456	chr5	+	50217217	p1@ENSMUST00000094797	ENSMUST00000196032.1	intergenic	mmu-mir-8117
chr5	-	53604574	chr5	-	53213335	p1@Sel1l3	NM_172710	intronic	mmu-novelmir-355
chr5	+	64621662	chr5	+	64230423	p1@Tbc1d1	ENSMUST00000119756.2	intronic	mmu-novelmir-358
chr5	+	65361355	chr5	+	64970116	p1@Fam114a1	NM_026667	intronic	mmu-mir-574
chr5	-	66089475	chr5	-	65698236	p1@Pds5a	NM_001081321	intronic	mmu-novelmir-359
chr5	+	73684052	chr5	+	73292813	p1@Ociad1	NM_023429	intronic	mmu-novelmir-360
chr5	+	75548360	chr5	+	75152335	p1@Pdgfra	NM_011058	intronic	mmu-mir-7025
chr5	+	77694507	chr5	+	77265482	p1@Rest	ENSMUST00000080359.8	intronic	mmu-mir-5098
chr5	+	90561399	chr5	+	90132374	p1@ENSMUST00000135410	XM_979078	intergenic	mmu-novelmir-364
chr5	-	90795594	chr5	-	90366568	p2@Ankrd17	ENSMUST00000168058.3	intronic	mmu-novelmir-365
chr5	-	92512741	chr5	-	92083715	p1@G3bp2	NM_011816	intronic	mmu-novelmir-366
chr5	-	92934672	chr5	-	92505646	p1@Scarb2	NM_007644	intronic	mmu-novelmir-368
chr5	-	103640303	chr5	-	103211284	p1@Mapk10	ENSMUST00000112846.4	intronic	mmu-novelmir-370
chr5	+	104475960	chr5	+	104046941	p1@Nudt9	ENSMUST00000142018.1	intronic	mmu-mir-5619
chr5	-	105565125	chr5	-	105136106	p@chr5:105565106..105565127,-	ENSMUST00000100961.4	intronic	mmu-novelmir-371
chr5	-	107718603	chr5	-	107289584	p1@Tgfbr3	ENSMUST00000031224.11	intronic	mmu-novelmir-373
chr5	+	108297487	chr5	+	107868468	p@chr5:108297484..108297498,+	ENSMUST00000196922.1	intergenic	mmu-novelmir-374
chr5	-	108304083	chr5	-	107875064	p2@Evi5	ENSMUST00000138111.4	intronic	mmu-novelmir-375
chr5	+	108494735	chr5	+	108065716	p1@Mtf2	ENSMUST00000141592.4	intronic	mmu-novelmir-376
chr5	+	108946153	chr5	+	108517134	p1@ENSMUST00000089781	XM_001478936	intronic	mmu-novelmir-377
chr5	-	109058769	chr5	-	108629750	p1@Gak	ENSMUST00000199048.1	intronic	mmu-novelmir-378
chr5	-	110698870	chr5	-	110269851	p1@Pgam5	ENSMUST00000196381.1	intronic	mmu-novelmir-380
chr5	+	110715367	chr5	+	110286348	p1@Pole	NM_011132	intronic	mmu-novelmir-381
chr5	-	111199604	chr5	-	110770585	p1@Ep400	NM_029337	intronic	mmu-mir-7026
chr5	+	111269002	chr5	+	110839983	p1@Chek2	ENSMUST00000199937.1	intronic	mmu-novelmir-382
chr5	+	111407684	chr5	+	110978665	p@chr5:111407675..111407695,+	XM_001481308	intronic	mmu-mir-701
chr5	-	114221662	chr5	-	113771653	p1@Sart3	NM_016926	intronic	mmu-novelmir-384
chr5	-	114358706	chr5	-	113908697	p1@Coro1c	ENSMUST00000164980.4	intronic	mmu-novelmir-385
chr5	+	114830838	chr5	+	114380829	p1@Ube3b	ENSMUST00000130169.4	intronic	mmu-mir-7027
chr5	+	114894297	chr5	+	114444288	p1@Mvk	ENSMUST00000112239.5	intronic	mmu-novelmir-386
chr5	+	115018332	chr5	+	114568323	p1@BC057022	NM_001004180	intronic	mmu-novelmir-387
chr5	+	115157828	chr5	+	114707819	p1@Tchp	ENSMUST00000124242.1	intronic	mmu-mir-7028
chr5	-	115263925	chr5	-	114813916	p1@ENSMUST00000061251	XM_001478612	intergenic	mmu-novelmir-388
chr5	+	115373358	chr5	+	114923349	p2@Oasl1	ENSMUST00000112143.3	intronic	mmu-novelmir-389
chr5	+	115392209	chr5	+	114942200	p1@2210016L21Rik	NM_028211	intronic	mmu-novelmir-390
chr5	-	115608155	chr5	-	115158146	p1@Mlec	NM_175403	intronic	mmu-novelmir-391
chr5	+	116015282	chr5	+	115565273	p1@Gcn1l1	NM_172719	intronic	mmu-mir-7029,mmu-novelmir-392,mmu-novelmir-393
chr5	+	116082028	chr5	+	115632019	p1@Rab35	NM_198163	intronic	mmu-mir-7030
chr5	+	118426779	chr5	+	117976770	p1@Fbxo21	NM_145564	intronic	mmu-novelmir-394
chr5	+	119010310	chr5	+	118560301	p1@Med13l	ENSMUST00000100816.4	intronic	mmu-novelmir-395
chr5	+	120121027	chr5	+	119671018	p1@Tbx3	ENSMUST00000018748.8	intronic	mmu-novelmir-396
chr5	+	121654543	chr5	+	121204534	p1@Gm6136,p1@Rpl6	NM_011290	intronic	mmu-novelmir-397
chr5	-	121953444	chr5	-	121503435	p1@Adam1b	ENSMUST00000079368.4	intronic	mmu-novelmir-398
chr5	-	122286836	chr5	-	121836827	p1@Sh2b3	ENSMUST00000136960.4	intronic	mmu-mir-7031
chr5	+	123093985	chr5	+	122643976	p1@P2rx7	ENSMUST00000031425.11	intronic	mmu-mir-8115
chr5	+	123592246	chr5	+	123142237	p1@Setd1b	ENSMUST00000163030.5	intronic	mmu-novelmir-399
chr5	-	123974142	chr5	-	123524133	p1@Diablo	ENSMUST00000111586.4	intronic	mmu-mir-7647
chr5	+	124199735	chr5	+	123749726	p1@Kntc1	NM_001042421	intronic	mmu-novelmir-400
chr5	+	124423733	chr5	+	123973724	p1@Hip1r	NM_145070	intronic	mmu-mir-7032
chr5	-	124482269	chr5	-	124032260	p1@Vps37b	NM_177876	intronic	mmu-novelmir-401
chr5	+	128112632	chr5	+	127632262	p1@Glt1d1	NM_177005	intronic	mmu-novelmir-403
chr5	-	129514377	chr5	-	129008502	p1@Stx2	ENSMUST00000100680.6	intronic	mmu-novelmir-405
chr5	+	130007120	chr5	+	129501245	p1@Sfswap	ENSMUST00000196698.1	intronic	mmu-novelmir-407
chr5	-	130175964	chr5	-	129670089	p1@Zfp11	NM_172462	intronic	mmu-novelmir-408
chr5	+	130293280	chr5	+	129787404	p1@Cct6a	NM_009838	intronic	mmu-novelmir-409
chr5	-	135870401	chr5	-	135394531	p1@Pom121	ENSMUST00000111171.5	intronic	mmu-mir-7033
chr5	-	136220121	chr5	-	135744251	p1@Tmem120a	NM_172541	intronic	mmu-mir-7034
chr5	+	136327308	chr5	+	135851438	p@chr5:136327290..136327309,+	ENSMUST00000013615.10	intronic	mmu-novelmir-410
chr5	-	136410467	chr5	-	135934597	p1@Ywhag	ENSMUST00000055808.5	intronic	mmu-novelmir-411
chr5	+	136559856	chr5	+	136083986	p1@Rasa4	ENSMUST00000125048.4	intronic	mmu-mir-7035
chr5	-	137043133	chr5	-	136567263	p1@Cux1	ENSMUST00000177297.4	intronic	mmu-mir-721
chr5	+	137463464	chr5	+	136987594	p1@Plod3	ENSMUST00000144784.4	intronic	mmu-mir-702
chr5	+	137729512	chr5	+	137288284	p1@Ache	ENSMUST00000085934.3	intronic	mmu-mir-8116
chr5	-	137748868	chr5	-	137307640	p1@Srrt	ENSMUST00000199243.1	intronic	mmu-mir-7036a
chr5	-	137974455	chr5	-	137533227	p1@Epo,p1@Gnb2	NM_010312	intronic	mmu-mir-6418
chr5	-	138613080	chr5	-	138171852	p1@Mcm7	NM_008568	intronic	mmu-mir-106b,mmu-mir-93,mmu-mir-25
chr5	-	139801455	chr5	-	139325501	p1@Adap1	ENSMUST00000110865.1	intronic	mmu-novelmir-415
chr5	-	139848188	chr5	-	139372234	p@chr5:139848167..139848196,-	AK019591	intergenic	mmu-mir-339
chr5	-	140251628	chr5	-	139775674	p1@Ints1	ENSMUST00000072607.5	intronic	mmu-novelmir-416,mmu-mir-7037
chr5	-	140302839	chr5	-	139826885	p1@Psmg3	ENSMUST00000031531.10	intronic	mmu-novelmir-417
chr5	-	140865157	chr5	-	140389203	p1@Snx8	NM_172277	intronic	mmu-novelmir-418
chr5	+	140895268	chr5	+	140419314	p1@Eif3b	NM_133916	intronic	mmu-mir-7038
chr5	+	141083297	chr5	+	140607343	p1@Lfng	NM_008494	intronic	mmu-novelmir-419
chr5	-	143668404	chr5	-	142906725	p1@Actb	NM_007393	intronic	mmu-novelmir-422
chr5	-	144288861	chr5	-	143527993	p1@Rac1	NM_009007	intronic	mmu-novelmir-423
chr5	-	144775757	chr5	-	144014888	p1@Ccz1	NM_177682	intronic	mmu-novelmir-424
chr5	-	145726699	chr5	-	144965830	p1@Smurf1	NM_001038627	intronic	mmu-novelmir-425,mmu-mir-7039
chr6	-	3713623	chr6	-	3763623	p1@Calcr	NM_001042725	intronic	mmu-mir-489,mmu-mir-653
chr6	-	6167118	chr6	-	6217118	p1@Slc25a13	NM_015829	intronic	mmu-novelmir-428
chr6	+	11875912	chr6	+	11925912	p1@Phf14	ENSMUST00000090632.7	intronic	mmu-novelmir-429
chr6	-	28085095	chr6	-	28135095	p1@Grm8	ENSMUST00000146727.1	intronic	mmu-mir-592
chr6	+	28430395	chr6	+	28480395	p1@Snd1	ENSMUST00000167201.1	intronic	mmu-novelmir-431
chr6	+	28931510	chr6	+	28981510	p1@ENSMUST00000164104	ENSMUST00000164104.2	intergenic	mmu-mir-129-1
chr6	-	30124123	chr6	-	30174123	p@chr6:30124117..30124136,-	curation	intergenic	mmu-novelmir-434,mmu-mir-183,mmu-mir-96,mmu-mir-182
chr6	+	30688053	chr6	+	30738053	p1@Mest	ENSMUST00000124665.1	intronic	mmu-mir-335
chr6	-	31076521	chr6	-	31126521	p@chr6:31076512..31076537,-	curation	intergenic	mmu-mir-29b-1,mmu-mir-29a
chr6	+	36338000	chr6	+	36388000	p1@Chrm2	ENSMUST00000172278.4	intronic	mmu-mir-490
chr6	+	38383925	chr6	+	38433925	p1@Ubn2	ENSMUST00000160583.4	intronic	mmu-mir-7670
chr6	-	39156788	chr6	-	39206789	p2@Jhdm1d	ENSMUST00000002305.8	intronic	mmu-novelmir-438
chr6	+	42300054	chr6	+	42350055	p1@Zyx	ENSMUST00000164375.1	intronic	mmu-novelmir-441
chr6	-	47544994	chr6	-	47594995	p1@Ezh2	NM_007971	intronic	mmu-novelmir-443
chr6	-	47763360	chr6	-	47813361	p1@Pdia4	NM_009787	intronic	mmu-mir-704
chr6	+	48689052	chr6	+	48739053	p1@Gimap1	ENSMUST00000127537.3	intronic	mmu-novelmir-447
chr6	-	49164713	chr6	-	49214714	p1@Igf2bp3	NM_023670	intronic	mmu-novelmir-448
chr6	+	50516740	chr6	+	50566741	p1@ENSMUST00000126537	ENSMUST00000126537.2	intergenic	mmu-mir-6371
chr6	-	51220929	chr6	-	51270930	p@chr6:51220895..51220940,-	curation	intergenic	mmu-mir-148a
chr6	-	51419844	chr6	-	51469845	p1@Hnrnpa2b1,p1@LOC100045191	ENSMUST00000090002.7	intronic	mmu-novelmir-450,mmu-novelmir-449
chr6	-	52180560	chr6	-	52230561	p1@ENSMUST00000174115	ENSMUST00000174115.1	intronic	mmu-mir-196b
chr6	-	52590313	chr6	-	52640319	p1@Hibadh	NM_145567	intronic	mmu-novelmir-452
chr6	-	53018622	chr6	-	53068628	p1@Jazf1	ENSMUST00000074541.5	intronic	mmu-novelmir-453
chr6	+	53989976	chr6	+	54039982	p1@Chn2	ENSMUST00000046856.10	intronic	mmu-novelmir-454
chr6	+	55402030	chr6	+	55452036	p1@Adcyap1r1	ENSMUST00000070756.8	intronic	mmu-novelmir-455
chr6	+	63206002	chr6	+	63256008	p1@Grid2	ENSMUST00000095852.3	intronic	mmu-novelmir-456
chr6	+	65729016	chr6	+	65779022	p1@Prdm5	ENSMUST00000081219.10	intronic	mmu-novelmir-457
chr6	+	71221692	chr6	+	71271698	p1@Krcc1	ENSMUST00000184382.1	intronic	mmu-mir-8112
chr6	-	71390492	chr6	-	71440498	p1@Rmnd5a	ENSMUST00000002292.11	intronic	mmu-novelmir-458
chr6	-	72849759	chr6	-	72899765	p1@Kcmf1	NM_019715	intronic	mmu-novelmir-459
chr6	-	82724431	chr6	-	82774437	p1@Hk2	ENSMUST00000000642.7	intronic	mmu-novelmir-461
chr6	+	82984214	chr6	+	83034220	p1@Loxl3	NM_013586	intronic	mmu-mir-7040
chr6	-	83391624	chr6	-	83441630	p1@Tet3	ENSMUST00000089622.7	intronic	mmu-novelmir-463,mmu-novelmir-462,mmu-mir-6374
chr6	-	85324621	chr6	-	85374627	p1@Rab11fip5	NM_177466	intronic	mmu-mir-705
chr6	-	87483229	chr6	-	87533235	p1@Arhgap25	NM_001037727	intronic	mmu-novelmir-464
chr6	+	87837922	chr6	+	87887928	p1@Copg	NM_017477	intronic	mmu-novelmir-466
chr6	-	87995215	chr6	-	88045221	p1@Rab7	NM_009005	intronic	mmu-novelmir-467
chr6	-	88468796	chr6	-	88518802	p1@Sec61a1	NM_016906	intronic	mmu-novelmir-468
chr6	-	88848674	chr6	-	88898680	p1@Mcm2	NM_008564	intronic	mmu-novelmir-470,mmu-novelmir-469
chr6	+	91162821	chr6	+	91212827	p1@Fbln2	NM_007992	intronic	mmu-novelmir-471
chr6	-	94233898	chr6	-	94283904	p1@Magi1	NM_010367	intronic	mmu-novelmir-472
chr6	-	94650158	chr6	-	94700164	p1@Lrig1	ENSMUST00000032105.7	intronic	mmu-mir-7041
chr6	+	97160789	chr6	+	97210795	p1@Arl6ip5	NM_022992	intronic	mmu-novelmir-473
chr6	-	99216526	chr6	-	99266532	p2@Foxp1	ENSMUST00000138754.5	intronic	mmu-novelmir-474
chr6	+	108163090	chr6	+	108213096	p1@Itpr1	NM_010585	intronic	mmu-mir-7661
chr6	+	113339106	chr6	+	113389112	p1@Ttll3	ENSMUST00000140505.4	intronic	mmu-novelmir-476
chr6	+	113647123	chr6	+	113697129	p1@Tatdn2	ENSMUST00000089018.7	intronic	mmu-mir-7042
chr6	+	115724591	chr6	+	115774573	p1@Cand2	NM_025958	intronic	mmu-mir-7660
chr6	+	116288040	chr6	+	116338022	p1@March8	ENSMUST00000079012.9	intronic	mmu-novelmir-478
chr6	-	116623816	chr6	-	116673798	p1@Rassf4	NM_178045	intronic	mmu-mir-7043
chr6	+	117856806	chr6	+	117906788	p1@Hnrnpf	ENSMUST00000179224.4	intronic	mmu-novelmir-480
chr6	+	117961382	chr6	+	118011364	p1@Rasgef1a	XM_986257	intronic	mmu-mir-7044
chr6	-	119367516	chr6	-	119417498	p1@Adipor2	NM_197985	intronic	mmu-novelmir-481
chr6	-	119494310	chr6	-	119544292	p1@Wnt5b	ENSMUST00000119369.1	intronic	mmu-novelmir-482
chr6	-	119988690	chr6	-	120038672	p1@Wnk1	ENSMUST00000060043.9	intronic	mmu-novelmir-483,mmu-mir-706
chr6	+	120616332	chr6	+	120666314	p1@Cecr2	XM_204234	intronic	mmu-novelmir-484
chr6	-	120772716	chr6	-	120822698	p1@Atp6v1e1	NM_007510	intronic	mmu-novelmir-485
chr6	+	122769931	chr6	+	122819913	p1@Foxj2	ENSMUST00000003238.10	intronic	mmu-mir-7231
chr6	-	124668861	chr6	-	124718843	p1@ENSMUST00000143765	ENSMUST00000143765.1	intergenic	mmu-mir-200c,mmu-mir-141
chr6	-	124915449	chr6	-	124965431	p1@Cops7a	ENSMUST00000032220.11	intronic	mmu-novelmir-487
chr6	+	124989866	chr6	+	125039848	p1@Ing4	NM_133345	intronic	mmu-novelmir-488
chr6	+	125046201	chr6	+	125096183	p1@Chd4	NM_145979	intronic	mmu-mir-7045,mmu-novelmir-489,mmu-novelmir-490
chr6	+	125142208	chr6	+	125192190	p1@Mrpl51	ENSMUST00000032485.6	intronic	mmu-mir-3098
chr6	-	125187032	chr6	-	125237014	p1@Cd27	ENSMUST00000032486.9	intronic	mmu-mir-8113
chr6	-	128305866	chr6	-	128355848	p1@Tulp3	NM_011657	intronic	mmu-novelmir-494
chr6	-	128841171	chr6	-	128891153	p1@BC035044	ENSMUST00000160290.4	intronic	mmu-novelmir-495
chr6	-	128924925	chr6	-	128974907	p1@Gm15987	ENSMUST00000141700.1	intergenic	mmu-mir-7649
chr6	-	129826690	chr6	-	129876672	p1@Klra17	NM_133203	intronic	mmu-novelmir-496
chr6	+	133985901	chr6	+	134035883	p1@Etv6	ENSMUST00000164648.1	intronic	mmu-novelmir-497,mmu-novelmir-498
chr6	-	142271504	chr6	-	142322984	p1@Slco1a5	ENSMUST00000081380.6	intronic	mmu-novelmir-499
chr6	+	144996106	chr6	+	145047586	p1@ENSMUST00000171485	ENSMUST00000180763.1	intergenic	mmu-novelmir-500
chr7	+	3217837	chr7	+	3217836	p@chr7:3217833..3217839,+	curation	intergenic	mmu-mir-290a,mmu-mir-291a,mmu-mir-292a,mmu-mir-291b,mmu-mir-293,mmu-mir-294,mmu-mir-295
chr7	+	3596891	chr7	+	3645289	p1@Cnot3	ENSMUST00000143085.4	intronic	mmu-mir-3572,mmu-novelmir-501
chr7	-	4484047	chr7	-	4532445	p1@6030429G01Rik	NM_001033548	intronic	mmu-novelmir-502
chr7	+	4691758	chr7	+	4740156	p1@Suv420h2	ENSMUST00000130215.4	intronic	mmu-novelmir-503
chr7	+	4866824	chr7	+	4915222	p1@Zfp628	ENSMUST00000116354.2	intronic	mmu-novelmir-504
chr7	+	6124115	chr7	+	6172513	p1@Zfp444	ENSMUST00000108566.4	intronic	mmu-novelmir-505
chr7	+	6683317	chr7	+	6730606	p1@Usp29	ENSMUST00000200535.1	intronic	mmu-mir-3099
chr7	-	7252222	chr7	-	7299511	p2@Clcn4-2	NM_011334	intronic	mmu-novelmir-506
chr7	+	16683992	chr7	+	16098643	p1@Napa	NM_025898	intronic	mmu-novelmir-508
chr7	-	17402081	chr7	-	16816732	p1@Fkrp	NM_173430	intronic	mmu-novelmir-509
chr7	-	17509261	chr7	-	16923912	p3@Calm3	NM_007590	intronic	mmu-novelmir-510
chr7	+	19669217	chr7	+	19083868	p1@Dmpk	ENSMUST00000122999.4	intronic	mmu-mir-3100
chr7	+	19766521	chr7	+	19181172	p1@Eml2	XM_133217	intronic	mmu-mir-330
chr7	+	19967370	chr7	+	19382021	p1@Ercc2	ENSMUST00000108461.4	intronic	mmu-mir-343
chr7	-	20044192	chr7	-	19458843	p1@Mark4	NM_172279	intronic	mmu-novelmir-513
chr7	+	20104043	chr7	+	19518694	p1@Nkpd1	XM_133219	intronic	mmu-novelmir-515
chr7	-	25757694	chr7	-	24972675	p1@Rabac1	NM_010261	intronic	mmu-mir-7046
chr7	-	25790932	chr7	-	25005913	p1@Atp1a3	NM_144921	intronic	mmu-mir-7047
chr7	-	25917504	chr7	-	25132485	p1@Pou2f2	ENSMUST00000175774.5	intronic	mmu-mir-6537
chr7	-	26004851	chr7	-	25219832	p1@Dedd2	NM_207677	intronic	mmu-mir-7048
chr7	+	26472022	chr7	+	25687003	p1@Tgfb1	NM_011577	intronic	mmu-novelmir-520
chr7	-	27963895	chr7	-	27178876	p1@Rab4b	ENSMUST00000128409.1	intronic	mmu-mir-3101
chr7	+	27980927	chr7	+	27195908	p1@BC024978	ENSMUST00000108379.7	intergenic	mmu-mir-1191a
chr7	-	29164274	chr7	-	28379255	p1@Zfp36	ENSMUST00000051241.5	intronic	mmu-novelmir-522
chr7	-	29383179	chr7	-	28598160	p1@Pak4	ENSMUST00000040531.8	intronic	mmu-mir-7049
chr7	+	29595956	chr7	+	28810937	p1@Hnrnpl	ENSMUST00000174477.4	intronic	mmu-novelmir-523
chr7	-	29910171	chr7	-	29125152	p1@Ryr1	NM_009109	intronic	mmu-novelmir-524,mmu-mir-1963
chr7	+	30093031	chr7	+	29308012	p1@Dpf1	ENSMUST00000138993.4	intronic	mmu-novelmir-526
chr7	-	30303570	chr7	-	29518551	p1@Sipa1l3	ENSMUST00000181975.4	intronic	mmu-novelmir-527
chr7	+	30553622	chr7	+	29768603	p1@Zfp84	NM_023750	intronic	mmu-mir-1964
chr7	+	30691215	chr7	+	29906196	p@chr7:30691212..30691259,+	curation	intergenic	mmu-mir-7668
chr7	+	31337559	chr7	+	30552540	p2@Hspb6	ENSMUST00000123355.4	intronic	mmu-mir-9769
chr7	-	31827132	chr7	-	31042113	p1@Fxyd5	ENSMUST00000160689.4	intronic	mmu-mir-7050
chr7	+	36182082	chr7	+	35397063	p1@Ccdc123	ENSMUST00000079414.8	intronic	mmu-novelmir-529
chr7	-	38554773	chr7	-	37769754	p1@Zfp536	NM_172385	intronic	mmu-novelmir-531
chr7	+	46773142	chr7	+	39517772	p1@Zfp619	NM_001004139	intronic	mmu-novelmir-532
chr7	+	50699500	chr7	+	43444130	p1@Etfb	NM_026695	intronic	mmu-mir-7051
chr7	+	50817642	chr7	+	43562272	p1@LOC100505180,p1@Zfp658	ENSMUST00000107972.4	intronic	mmu-novelmir-534
chr7	+	51723429	chr7	+	44468059	p1@Josd2	NM_025368	intronic	mmu-mir-7052
chr7	-	51804167	chr7	-	44548797	p1@Pold1	NM_011131	intronic	mmu-mir-7053
chr7	+	52104620	chr7	+	44849250	p1@Akt1s1	NM_026270	intronic	mmu-mir-707
chr7	-	52271483	chr7	-	45016113	p1@Scaf1	ENSMUST00000153243.4	intronic	mmu-mir-7054
chr7	+	52377084	chr7	+	45121714	p1@Mir150	curation	intergenic	mmu-mir-150
chr7	-	52384106	chr7	-	45128736	p1@Rpl13a	NM_009438	intronic	mmu-mir-5121
chr7	+	52419319	chr7	+	45163949	p1@Slc17a7	ENSMUST00000085374.5	intronic	mmu-mir-7055
chr7	-	52589139	chr7	-	45333769	p1@Trpm4	ENSMUST00000042194.8	intronic	mmu-novelmir-536
chr7	-	52651062	chr7	-	45395692	p1@Snrnp70	ENSMUST00000074575.7	intronic	mmu-novelmir-538,mmu-novelmir-537
chr7	-	52689653	chr7	-	45434283	p1@Ruvbl2	NM_011304	intronic	mmu-novelmir-539
chr7	-	52781594	chr7	-	45526224	p1@Ppp1r15a	NM_008654	intronic	mmu-novelmir-540
chr7	-	52973297	chr7	-	45717927	p1@Sphk2	NM_203280	intronic	mmu-novelmir-541
chr7	+	53289110	chr7	+	46033740	p1@Nomo1	ENSMUST00000033121.6	intronic	mmu-novelmir-542
chr7	-	54387699	chr7	-	47132329	p1@Ptpn5	ENSMUST00000126370.4	intronic	mmu-mir-7056
chr7	+	56214477	chr7	+	48959107	p3@Nav2	ENSMUST00000183659.4	intronic	mmu-novelmir-545
chr7	+	57230648	chr7	+	49975278	p1@Nell1	ENSMUST00000107603.1	intronic	mmu-novelmir-546
chr7	+	62091007	chr7	+	54835637	p1@Luzp2	ENSMUST00000082373.6	intronic	mmu-novelmir-547
chr7	+	64675022	chr7	+	57419652	p@chr7:64675015..64675028,+	ENSMUST00000085240.7	intronic	mmu-mir-6389
chr7	+	65913561	chr7	+	58658191	p1@Atp10a	ENSMUST00000168747.1	intronic	mmu-novelmir-549
chr7	-	69127241	chr7	-	61982355	p1@Mir344g	curation	intergenic	mmu-novelmir-561,mmu-mir-344g,mmu-mir-344-2,mmu-mir-344-1,mmu-mir-344c,mmu-mir-344b,mmu-mir-344h-2,mmu-mir-344h-1,mmu-mir-344e,mmu-mir-344d-2,mmu-mir-344d-1,mmu-mir-344d-3
chr7	-	69191132	chr7	-	62046246	p1@Mir344f	curation	intergenic	mmu-mir-344f
chr7	+	71330439	chr7	+	64185553	p1@Trpm1	ENSMUST00000107519.4	intronic	mmu-mir-211
chr7	-	73533194	chr7	-	66388308	p1@Lrrk1	ENSMUST00000154893.1	intronic	mmu-mir-7057
chr7	-	74790117	chr7	-	67645231	p1@Lrrc28	NM_175124	intronic	mmu-novelmir-562
chr7	+	75420870	chr7	+	68275984	p1@ENSMUST00000153805	ENSMUST00000125685.4	intergenic	mmu-novelmir-564
chr7	-	80686632	chr7	-	73541746	p1@Chd2	ENSMUST00000026895.10	intronic	mmu-novelmir-567,mmu-novelmir-566
chr7	-	85723241	chr7	-	78578355	p1@Ntrk3	ENSMUST00000039431.10	intronic	mmu-novelmir-568
chr7	-	85927925	chr7	-	78783039	p1@Mrpl46	ENSMUST00000032841.5	intronic	mmu-novelmir-569
chr7	+	86027513	chr7	+	78882627	p@chr7:86027505..86027520,+	curation	intergenic	mmu-mir-7a-2
chr7	+	86537213	chr7	+	79392327	p1@Fanci	ENSMUST00000118959.4	intronic	mmu-novelmir-572
chr7	+	86644911	chr7	+	79500025	p1@AI854517	ENSMUST00000182495.1	intergenic	mmu-mir-9-3
chr7	+	88668459	chr7	+	81523573	p1@2900076A07Rik	ENSMUST00000180879.4	intergenic	mmu-mir-1839
chr7	+	88716171	chr7	+	81571285	p1@Whamm	NM_001004185	intronic	mmu-novelmir-575
chr7	+	89003987	chr7	+	81859101	p1@Tm6sf1	NM_145375	intronic	mmu-novelmir-576
chr7	+	89483982	chr7	+	82335472	p1@Adamtsl3	ENSMUST00000173287.4	intronic	mmu-novelmir-577
chr7	+	103358667	chr7	+	96210157	p1@Odz4	ENSMUST00000129445.4	intronic	mmu-mir-708,mmu-mir-6394
chr7	+	104520136	chr7	+	97371626	p1@Alg8	NM_199035	intronic	mmu-novelmir-579
chr7	+	106614537	chr7	+	99466027	p1@Klhl35	XM_133597	intronic	mmu-novelmir-580
chr7	+	106684235	chr7	+	99535725	p1@Arrb1	ENSMUST00000162404.4	intronic	mmu-mir-326
chr7	-	106855346	chr7	-	99706836	p1@Slco2b1	ENSMUST00000107088.4	intronic	mmu-novelmir-581
chr7	-	107128958	chr7	-	99980448	p1@Rnf169	ENSMUST00000080817.4	intronic	mmu-novelmir-582
chr7	-	108080675	chr7	-	100932161	p1@Arhgef17	NM_001081116	intronic	mmu-mir-3102
chr7	+	108599821	chr7	+	101451307	p1@Pde2a	ENSMUST00000166652.1	intronic	mmu-mir-139
chr7	+	109054461	chr7	+	101905947	p1@2400001E08Rik	NM_025605	intronic	mmu-novelmir-584
chr7	+	109119192	chr7	+	101970678	p@chr7:109119156..109119203,+	NM_133947	intronic	mmu-novelmir-585
chr7	-	109713964	chr7	-	102565450	p1@Trim21	NM_001082552	intronic	mmu-novelmir-587
chr7	+	117365266	chr7	+	110221752	p1@Swap70	NM_009302	intronic	mmu-novelmir-588
chr7	-	121398211	chr7	-	114254697	p1@Copb1	NM_033370	intronic	mmu-novelmir-590
chr7	-	123451862	chr7	-	116308348	p1@Plekha7	ENSMUST00000182487.4	intronic	mmu-novelmir-591
chr7	+	130521551	chr7	+	123378037	p1@Lcmt1	NM_025304	intronic	mmu-novelmir-594
chr7	+	130605873	chr7	+	123462359	p1@Aqp8	NM_007474	intronic	mmu-novelmir-595
chr7	-	133513084	chr7	-	126369570	p1@Lat	ENSMUST00000032997.6	intronic	mmu-mir-7058
chr7	-	133540239	chr7	-	126396725	p1@Nfatc2ip	NM_010900	intronic	mmu-novelmir-598
chr7	-	133646880	chr7	-	126503366	p1@Atxn2l	NM_183020	intronic	mmu-novelmir-599
chr7	-	133726876	chr7	-	126583362	p1@Cln3,p1@LOC100047702	ENSMUST00000150917.4	intronic	mmu-novelmir-600,mmu-mir-7059
chr7	-	134351972	chr7	-	127208458	p1@Tbc1d10b	NM_144522	intronic	mmu-novelmir-601
chr7	-	134376756	chr7	-	127233242	p3@Gm4532	XM_001480358	intergenic	mmu-novelmir-602
chr7	+	134439897	chr7	+	127296383	p2@Itgal	ENSMUST00000170971.4	intronic	mmu-novelmir-603
chr7	+	134622342	chr7	+	127478828	p@chr7:134622310..134622353,+	XM_284344	intronic	mmu-mir-7060
chr7	+	134655544	chr7	+	127512030	p1@Snora30,p1@Srcap	XM_001480403	intronic	mmu-novelmir-604
chr7	+	134889820	chr7	+	127746306	p1@Fbxl19	NM_172748	intronic	mmu-novelmir-605
chr7	-	135441623	chr7	-	128298109	p1@BC017158	ENSMUST00000155177.4	intronic	mmu-mir-3103
chr7	+	138009401	chr7	+	130865887	p1@Plekha1	ENSMUST00000075181.7	intronic	mmu-mir-7061
chr7	-	139768029	chr7	-	132576346	p1@Oat	ENSMUST00000124096.4	intronic	mmu-novelmir-608,mmu-novelmir-606
chr7	-	140315050	chr7	-	133123367	p1@Ctbp2	ENSMUST00000033269.11	intronic	mmu-novelmir-609
chr7	+	142729507	chr7	+	135537824	p1@Ptpre	NM_011212	intronic	mmu-mir-1962
chr7	-	144506111	chr7	-	137314428	p1@Ebf3	ENSMUST00000168203.1	intronic	mmu-novelmir-610
chr7	-	144602439	chr7	-	137410756	p1@9430038I01Rik	XM_133909	intronic	mmu-novelmir-611
chr7	+	146434403	chr7	+	139248504	p1@Pwwp2b	NM_001033206	intronic	mmu-novelmir-612
chr7	+	146574987	chr7	+	139389088	p1@Inpp5a	ENSMUST00000106098.4	intronic	mmu-novelmir-613
chr7	-	147143938	chr7	-	139958039	p1@Mir202	ENSMUST00000130771.1	intergenic	mmu-mir-7686,mmu-mir-202
chr7	-	147178412	chr7	-	139992513	p1@Adam8	NM_007403	intronic	mmu-mir-7062
chr7	+	148043322	chr7	+	140857423	p1@Ric8	NM_053194	intronic	mmu-novelmir-614
chr7	-	148407618	chr7	-	141221719	p1@Mir210	curation	intergenic	mmu-mir-210
chr7	+	148748128	chr7	+	141562229	p1@Ap2a2	NM_007459	intronic	mmu-mir-7063
chr7	+	149135616	chr7	+	141949711	p1@Brsk2	NM_029426	intronic	mmu-mir-3104
chr7	+	149387269	chr7	+	142201364	p1@Krtap5-3	ENSMUST00000187512.1	intronic	mmu-novelmir-617
chr7	+	149684745	chr7	+	142498840	p1@Tnnt3	NM_011620	intronic	mmu-novelmir-618
chr7	-	149764053	chr7	-	142578148	p2@H19	NR_001592	intergenic	mmu-novelmir-619,mmu-mir-675
chr7	-	149843384	chr7	-	142657479	p1@Igf2	ENSMUST00000097936.5	intronic	mmu-mir-483
chr7	+	150191595	chr7	+	143005690	p1@Tspan32	NM_020286	intronic	mmu-novelmir-620
chr7	-	150482445	chr7	-	143296540	p1@Kcnq1ot1	ENSMUST00000185789.1	intergenic	mmu-novelmir-621
chr7	-	150785961	chr7	-	143600056	p1@Cars	NM_013742	intronic	mmu-mir-7064
chr7	+	151194314	chr7	+	144008409	p@chr7:151194303..151194319,+	ENSMUST00000105902.4	intronic	mmu-mir-3105
chr7	-	151739591	chr7	-	144553686	p1@Ppfia1	XM_133979	intronic	mmu-novelmir-623
chr7	-	151768346	chr7	-	144582441	p1@Fadd	NM_010175	intronic	mmu-novelmir-624
chr8	-	8690532	chr8	-	8690532	p1@Arglu1	NM_176849	intronic	mmu-mir-7654
chr8	+	11497576	chr8	+	11497576	p1@Carkd	ENSMUST00000033901.7	intronic	mmu-novelmir-627
chr8	-	11635754	chr8	-	11635754	p1@Ankrd10	ENSMUST00000033905.8	intronic	mmu-mir-7238
chr8	+	11728248	chr8	+	11728248	p3@Arhgef7	ENSMUST00000110909.5	intronic	mmu-novelmir-628
chr8	+	11758365	chr8	+	11758365	p1@Arhgef7	ENSMUST00000074856.9	intronic	mmu-novelmir-629
chr8	+	12873806	chr8	+	12873806	p6@Mcf2l	ENSMUST00000095456.6	intronic	mmu-novelmir-630
chr8	+	12915911	chr8	+	12915911	p1@Mcf2l	ENSMUST00000156405.4	intronic	mmu-mir-9768
chr8	+	13105740	chr8	+	13105740	p1@Cul4a	NM_146207	intronic	mmu-mir-7065
chr8	-	13200617	chr8	-	13200617	p1@Grtp1	NM_025768	intronic	mmu-mir-1968
chr8	-	17535367	chr8	-	17535367	p1@Csmd1	NM_053171	intronic	mmu-mir-3106
chr8	+	19492909	chr8	+	19492909	p1@ENSMUST00000122422	ENSMUST00000122422.1	intergenic	mmu-novelmir-633
chr8	-	23817031	chr8	-	22706559	p1@Ikbkb	NM_010546	intronic	mmu-novelmir-635
chr8	+	24145616	chr8	+	23035144	p1@Ank1	ENSMUST00000117296.4	intronic	mmu-mir-486a
chr8	-	24260175	chr8	-	23149703	p1@ENSMUST00000141930	ENSMUST00000141930.1	intergenic	mmu-mir-486b
chr8	-	26312024	chr8	-	25201552	p2@Tacc1	NM_199323	intronic	mmu-mir-8108
chr8	-	39724525	chr8	-	38661471	p1@Sgcz	ENSMUST00000135764.4	intronic	mmu-mir-383
chr8	-	41393774	chr8	-	40308420	p1@Fgf20	ENSMUST00000118639.1	intronic	mmu-mir-7666
chr8	-	47296384	chr8	-	46211030	p1@Slc25a4	NM_007450	intronic	mmu-novelmir-639
chr8	-	71708097	chr8	-	69184198	p1@ENSMUST00000172413,p1@uc009lxb.1	ENSMUST00000181890.1	intronic	mmu-novelmir-643
chr8	-	72498184	chr8	-	69974285	p1@Gatad2a	ENSMUST00000116463.2	intronic	mmu-novelmir-645
chr8	-	72644722	chr8	-	70120823	p1@Ncan	NM_007789	intronic	mmu-mir-7066
chr8	-	72877199	chr8	-	70353300	p1@Upf1	NM_030680	intronic	mmu-novelmir-646
chr8	-	72963489	chr8	-	70439590	p1@Crtc1	ENSMUST00000076615.5	intronic	mmu-novelmir-647
chr8	-	73046997	chr8	-	70523098	p1@2810422J05Rik,p2@Uba52	ENSMUST00000137610.1	intronic	mmu-novelmir-648
chr8	+	73118404	chr8	+	70594505	p1@Isyna1	NM_023627	intronic	mmu-novelmir-649
chr8	-	73300603	chr8	-	70776704	p1@Pik3r2	ENSMUST00000034296.11	intronic	mmu-novelmir-652
chr8	-	73316300	chr8	-	70792401	p1@Mast3	ENSMUST00000166004.1	intronic	mmu-novelmir-653
chr8	-	73421314	chr8	-	70897415	p1@Gm15427,p1@Rpl18a	NM_029751	intronic	mmu-mir-7067
chr8	+	73796619	chr8	+	71272720	p1@Myo9b	NM_015742	intronic	mmu-novelmir-654
chr8	+	74116106	chr8	+	71592207	p1@Pgls	ENSMUST00000123240.1	intronic	mmu-novelmir-655
chr8	-	74195640	chr8	-	71671741	p1@Unc13a	ENSMUST00000177517.4	intronic	mmu-mir-6769b
chr8	-	74999034	chr8	-	72475135	p1@Cherp	NM_138585	intronic	mmu-mir-7068
chr8	+	75170617	chr8	+	72646718	p1@Nwd1	ENSMUST00000161557.4	intronic	mmu-novelmir-657
chr8	+	77517584	chr8	+	74993685	p1@Hmgxb4	ENSMUST00000145919.1	intronic	mmu-novelmir-659
chr8	-	80041812	chr8	-	77517913	p1@Arhgap10	NM_030113	intronic	mmu-novelmir-660
chr8	+	81552162	chr8	+	79028263	p1@Zfp827	NM_178267	intronic	mmu-novelmir-661
chr8	-	86265082	chr8	-	83741183	p1@Cd97	ENSMUST00000109802.2	intronic	mmu-mir-1668
chr8	-	86423149	chr8	-	83899250	p1@ENSMUST00000128875,p1@uc009mlf.1	ENSMUST00000181723.1	intergenic	mmu-novelmir-662
chr8	-	86536060	chr8	-	84012161	p1@Mir1199	ENSMUST00000190457.1	intronic	mmu-mir-1199
chr8	+	86590762	chr8	+	84066863	p1@Rfx1	NM_009055	intronic	mmu-mir-709
chr8	-	86671768	chr8	-	84147869	p1@Cc2d1a	ENSMUST00000117424.5	intronic	mmu-novelmir-663
chr8	-	86707975	chr8	-	84184076	p@chr8:86707961..86707985,-	ENSMUST00000211482.1	intergenic	mmu-mir-181c,mmu-mir-181d
chr8	+	86724768	chr8	+	84200869	p@chr8:86724759..86724774,+	curation	intergenic	mmu-mir-23a,mmu-mir-27a,mmu-mir-24-2,mmu-novelmir-664
chr8	-	86760954	chr8	-	84237055	p1@Zswim4	NM_172503	intronic	mmu-novelmir-665
chr8	-	86794270	chr8	-	84270371	p1@Ccdc130	NM_026350	intronic	mmu-novelmir-666
chr8	-	87211770	chr8	-	84687871	p1@Nacc1	ENSMUST00000001975.4	intronic	mmu-novelmir-667
chr8	+	87380908	chr8	+	84857009	p1@Farsa	ENSMUST00000109754.1	intronic	mmu-mir-7069
chr8	-	87461258	chr8	-	84937359	p1@Mast1	ENSMUST00000119820.1	intronic	mmu-novelmir-668
chr8	+	87560813	chr8	+	85036914	p1@Tnpo2	NM_145390	intronic	mmu-novelmir-669
chr8	+	87584002	chr8	+	85060103	p1@Fbxw9	ENSMUST00000145479.4	intronic	mmu-mir-7070
chr8	+	87607211	chr8	+	85083312	p1@Man2b1	NM_010764	intronic	mmu-novelmir-670
chr8	+	90661774	chr8	+	88137875	p1@Heatr3	NM_172757	intronic	mmu-mir-7071
chr8	+	91045256	chr8	+	88521357	p1@Nkd1	NM_027280	intronic	mmu-novelmir-671
chr8	+	93479334	chr8	+	90955435	p2@Chd9	NM_177224	intronic	mmu-novelmir-672
chr8	+	96334487	chr8	+	93810587	p1@Gnao1	NM_010308	intronic	mmu-novelmir-673
chr8	+	96846075	chr8	+	94322175	p@chr8:96846073..96846076,+	ENSMUST00000212800.1	intergenic	mmu-mir-138-2
chr8	+	96996764	chr8	+	94472864	p1@ENSMUST00000053085	ENSMUST00000053085.8	intronic	mmu-novelmir-675
chr8	+	97004605	chr8	+	94480705	p@chr8:97004586..97004607,+	ENSMUST00000182409.4	intronic	mmu-mir-7072
chr8	-	98331333	chr8	-	95807433	p1@Cnot1	ENSMUST00000098473.7	intronic	mmu-mir-7073
chr8	-	101940339	chr8	-	99416439	p1@Cdh8	ENSMUST00000093249.7	intronic	mmu-novelmir-679
chr8	+	107115395	chr8	+	104591495	p1@Pdp2	NM_001024606	intronic	mmu-novelmir-681
chr8	+	108129152	chr8	+	105605252	p1@Fam65a	ENSMUST00000043531.8	intronic	mmu-mir-1966
chr8	-	108161339	chr8	-	105637439	p1@Agrp	ENSMUST00000194091.2	intronic	mmu-novelmir-684
chr8	-	108489968	chr8	-	105966068	p1@Slc12a4	ENSMUST00000116429.5	intronic	mmu-mir-7074
chr8	+	108734923	chr8	+	106211023	p1@Prmt7	NM_145404	intronic	mmu-novelmir-686
chr8	-	109417493	chr8	-	106893593	p1@Chtf8	NM_145412	intronic	mmu-novelmir-688
chr8	-	109620445	chr8	-	107096545	p1@Terf2	NM_009353	intronic	mmu-mir-7075
chr8	+	109960294	chr8	+	107436394	p1@Wwp2	NM_025830	intronic	mmu-mir-140
chr8	+	111238938	chr8	+	108715038	p1@Zfhx3	NM_007496	intronic	mmu-mir-3108
chr8	+	113245376	chr8	+	110721476	p1@Mtss1l	ENSMUST00000052457.11	intronic	mmu-novelmir-689
chr8	-	113370681	chr8	-	110846781	p1@Sf3b3	NM_133953	intronic	mmu-novelmir-690
chr8	-	113521717	chr8	-	110997817	p1@Ddx19a	NM_007916	intronic	mmu-novelmir-691
chr8	-	113551665	chr8	-	111027765	p1@Ddx19b	NM_172284	intronic	mmu-mir-3473d
chr8	-	114214910	chr8	-	111691010	p1@Ctrb1	NM_025583	intronic	mmu-mir-7076
chr8	-	114378237	chr8	-	111854337	p1@Cfdp1	NM_011801	intronic	mmu-novelmir-692
chr8	+	119681881	chr8	+	117157981	p1@Gan	NM_001081151	intronic	mmu-novelmir-693
chr8	+	119780617	chr8	+	117256717	p1@4933407C03Rik	ENSMUST00000166750.4	intronic	mmu-mir-7077,mmu-mir-7078
chr8	+	123012334	chr8	+	120488434	p3@Gse1	ENSMUST00000034279.12	intronic	mmu-novelmir-695
chr8	+	123061392	chr8	+	120537492	p1@Gse1	ENSMUST00000118136.1	intronic	mmu-mir-7687,mmu-novelmir-696
chr8	+	123192190	chr8	+	120668290	p1@Cox4i1	ENSMUST00000127664.1	intronic	mmu-novelmir-697
chr8	+	124474467	chr8	+	121950567	p1@Banp	ENSMUST00000172681.4	intronic	mmu-mir-7237
chr8	-	125075224	chr8	-	122551324	p1@Fam38a	ENSMUST00000067252.10	intronic	mmu-novelmir-699
chr8	-	125146648	chr8	-	122622748	p1@Pabpn1l	ENSMUST00000093059.2	intronic	mmu-mir-6396
chr8	+	125626284	chr8	+	123102384	p1@Gm10071,p1@Gm12918,p1@Gm15710,p1@Rpl13	NM_016738	intronic	mmu-mir-7079
chr8	+	125641274	chr8	+	123117374	p2@Cpne7	NM_170684	intronic	mmu-mir-7080
chr8	-	125842460	chr8	-	123318560	p1@Fanca	ENSMUST00000155488.4	intronic	mmu-novelmir-700
chr8	-	126545273	chr8	-	124021373	p1@Taf5l	NM_133966	intronic	mmu-novelmir-701
chr8	+	126545397	chr8	+	124021497	p1@Urb2	ENSMUST00000173168.4	intronic	mmu-mir-1967
chr8	+	127044684	chr8	+	124520784	p1@Cog2	ENSMUST00000034460.7	intronic	mmu-novelmir-702
chr8	-	128422205	chr8	-	125898305	p1@Pcnxl2	NM_175561	intronic	mmu-novelmir-703
chr8	+	130882972	chr8	+	128359072	p1@Nrp1	ENSMUST00000026917.8	intronic	mmu-mir-1903
chr8	+	131209676	chr8	+	128685776	p1@Itgb1	NM_010578	intronic	mmu-novelmir-705
chr9	+	7764165	chr9	+	7764165	p1@Tmem123	ENSMUST00000154371.1	intronic	mmu-mir-5618,mmu-novelmir-708
chr9	-	8004571	chr9	-	8004571	p1@Yap1	NM_009534	intronic	mmu-novelmir-709
chr9	-	14419446	chr9	-	14615002	p1@Amotl1	NM_001081395	intronic	mmu-novelmir-710
chr9	+	15110707	chr9	+	15306263	p1@Taf1d	NR_028401	intronic	mmu-mir-7650,mmu-novelmir-711,mmu-novelmir-712,mmu-novelmir-713
chr9	-	20757261	chr9	-	20952817	p1@Dnmt1	NM_010066	intronic	mmu-novelmir-714,mmu-mir-7081
chr9	-	20896443	chr9	-	21091999	p1@Raver1-fdx1l,p1@Raver1	NM_027911	intronic	mmu-novelmir-716,mmu-mir-7082
chr9	+	21229395	chr9	+	21424951	p1@Dnm2	NM_001039520	intronic	mmu-novelmir-717
chr9	-	21301145	chr9	-	21496701	p4@Mir199a-1	curation	intergenic	mmu-mir-199a-1
chr9	-	21657066	chr9	-	21852622	p1@Dock6	NM_177030	intronic	mmu-mir-7083
chr9	-	21768020	chr9	-	21963576	p1@Epor	NM_010149	intronic	mmu-novelmir-719
chr9	-	21921602	chr9	-	22117158	p1@Elof1	ENSMUST00000013966.6	intronic	mmu-mir-7084
chr9	-	26837637	chr9	-	27030052	p1@Vps26b	NM_178027	intronic	mmu-novelmir-720
chr9	+	41282938	chr9	+	41474855	p1@Mir125b-1	ENSMUST00000188277.3	intergenic	mmu-mir-100,mmu-let-7a-2,mmu-novelmir-723
chr9	+	41389422	chr9	+	41581339	p1@2610203C20Rik	ENSMUST00000181955.1	intergenic	mmu-mir-125b-1
chr9	+	44187626	chr9	+	44379543	p1@Hyou1	ENSMUST00000162560.4	intronic	mmu-novelmir-725
chr9	+	44206437	chr9	+	44398354	p1@Slc37a4	NM_008063	intronic	mmu-mir-7085
chr9	-	45077232	chr9	-	45269149	p1@Il10ra	ENSMUST00000034594.12	intronic	mmu-mir-7086
chr9	-	45763317	chr9	-	45955234	p1@Sidt2	ENSMUST00000038488.12	intronic	mmu-mir-7087
chr9	-	45792912	chr9	-	45984829	p1@Pafah1b2	NM_008775	intronic	mmu-novelmir-726
chr9	+	45820933	chr9	+	46012850	p1@Sik3	ENSMUST00000126865.4	intronic	mmu-novelmir-727
chr9	-	48644330	chr9	-	48836225	p1@Zbtb16	NM_001033324	intronic	mmu-novelmir-729,mmu-novelmir-728
chr9	-	50411922	chr9	-	50603817	p1@Sdhd	NM_025848	intronic	mmu-novelmir-730
chr9	-	50912096	chr9	-	51103991	p1@Mir34b	curation	intergenic	mmu-mir-34b,mmu-mir-34c
chr9	+	51021796	chr9	+	51213691	p1@Pou2af1	NM_011136	intronic	mmu-novelmir-732
chr9	+	53345153	chr9	+	53537048	p1@Npat	NM_001081152	intronic	mmu-novelmir-736
chr9	+	54547366	chr9	+	54699559	p1@Dnaja4	NM_021422	intronic	mmu-mir-5710
chr9	+	55889677	chr9	+	56041870	p1@Rcn2	ENSMUST00000114276.2	intronic	mmu-novelmir-737
chr9	+	56978578	chr9	+	57130771	p1@Man2c1	ENSMUST00000034836.12	intronic	mmu-novelmir-738
chr9	-	57287903	chr9	-	57440096	p1@Ppcdc	NM_176831	intronic	mmu-novelmir-741
chr9	+	57556392	chr9	+	57708585	p1@Edc3	NM_153799	intronic	mmu-novelmir-742
chr9	+	58430214	chr9	+	58582407	p1@Nptn	ENSMUST00000114121.7	intronic	mmu-novelmir-747,mmu-novelmir-748
chr9	-	61970416	chr9	-	62122609	p1@Glce	ENSMUST00000185510.1	intronic	mmu-mir-5133
chr9	+	64949284	chr9	+	65101477	p1@Igdcc4	ENSMUST00000077696.9	intronic	mmu-novelmir-750,mmu-novelmir-751
chr9	-	67147048	chr9	-	67299241	p@chr9:67147043..67147088,-	ENSMUST00000039662.8	intronic	mmu-mir-190a
chr9	+	69301503	chr9	+	69453696	p1@Anxa2	NM_007585	intronic	mmu-mir-3109
chr9	+	69837322	chr9	+	69989515	p1@Bnip2	ENSMUST00000117450.4	intronic	mmu-novelmir-756
chr9	+	72380057	chr9	+	72532250	p1@Rfx7	ENSMUST00000184851.1	intronic	mmu-novelmir-759
chr9	+	72510256	chr9	+	72662449	p1@Nedd4	NM_010890	intronic	mmu-novelmir-760
chr9	+	74800721	chr9	+	74952914	p2@BC031353	ENSMUST00000170846.4	intronic	mmu-novelmir-761
chr9	+	74919370	chr9	+	75071563	p1@Myo5a	ENSMUST00000136731.4	intronic	mmu-novelmir-762
chr9	-	90009530	chr9	-	90114692	p1@Gm6747,p1@Morf4l1	ENSMUST00000190345.1	intronic	mmu-novelmir-765
chr9	+	94570340	chr9	+	94669921	p1@Slc9a9	NM_177909	intronic	mmu-mir-7656
chr9	-	96919167	chr9	-	97018748	p1@Spsb4	ENSMUST00000064445.1	intronic	mmu-novelmir-767
chr9	+	98464150	chr9	+	98563731	p1@Copb2	NM_015827	intronic	mmu-novelmir-768
chr9	-	102256987	chr9	-	102354657	p1@Ephb1	NM_173447	intronic	mmu-mir-7243
chr9	-	103267998	chr9	-	103365668	p1@Cdv3	ENSMUST00000189896.1	intronic	mmu-novelmir-769
chr9	-	104165255	chr9	-	104262925	p1@Dnajc13	ENSMUST00000035170.9	intronic	mmu-novelmir-770
chr9	-	105297592	chr9	-	105395262	p1@Nek11	NM_172461	intronic	mmu-novelmir-771
chr9	+	106051029	chr9	+	106148698	p1@Mir135a-1	ENSMUST00000143956.1	intergenic	mmu-mir-135a-1,mmu-novelmir-772
chr9	+	106073260	chr9	+	106170929	p1@Wdr82	ENSMUST00000020490.8	intronic	mmu-let-7g
chr9	+	106379652	chr9	+	106477321	p1@Rrp9	ENSMUST00000125630.4	intronic	mmu-novelmir-773
chr9	+	107302151	chr9	+	107399820	p1@Cacna2d2	ENSMUST00000085092.8	intronic	mmu-novelmir-775
chr9	-	107444452	chr9	-	107542121	p1@Cyb561d2	ENSMUST00000194906.1	intronic	mmu-novelmir-776
chr9	-	107775055	chr9	-	107872724	p1@Rbm6	ENSMUST00000195883.2	intronic	mmu-novelmir-777
chr9	+	107904976	chr9	+	108002645	p1@Ip6k1	ENSMUST00000167159.5	intronic	mmu-novelmir-778
chr9	+	107982785	chr9	+	108080454	p1@Mst1	ENSMUST00000162886.1	intronic	mmu-mir-7088
chr9	+	108208713	chr9	+	108306382	p1@Gm12844,p1@Rhoa	NM_016802	intronic	mmu-novelmir-779
chr9	-	108469746	chr9	-	108567415	p2@Ndufaf3	ENSMUST00000074208.5	intronic	mmu-novelmir-780
chr9	+	108469864	chr9	+	108567533	p@chr9:108469857..108469871,+	ENSMUST00000193193.1	intergenic	mmu-mir-191,mmu-mir-425
chr9	+	108855631	chr9	+	108953586	p1@Col7a1	ENSMUST00000112070.4	intronic	mmu-mir-711
chr9	-	108998296	chr9	-	109095782	p@chr9:108998289..108998318,-	ENSMUST00000134690.1	intergenic	mmu-novelmir-782
chr9	+	109778084	chr9	+	109875580	p1@Cdc25a	NM_007658	intronic	mmu-mir-7089
chr9	-	110019910	chr9	-	110117406	p1@Dhx30	ENSMUST00000111991.5	intronic	mmu-novelmir-783
chr9	+	110147943	chr9	+	110245439	p@chr9:110147925..110147995,+	NM_013884	intronic	mmu-novelmir-784
chr9	+	110207700	chr9	+	110305196	p1@2610002I17Rik	XM_135177	intronic	mmu-novelmir-785
chr9	-	110310694	chr9	-	110408190	p1@Ptpn23	NM_001081043	intronic	mmu-novelmir-786
chr9	-	110556487	chr9	-	110653983	p1@Nbeal2	ENSMUST00000196488.1	intronic	mmu-mir-8107
chr9	-	112119832	chr9	-	112217328	p1@Arpp21	ENSMUST00000159451.4	intronic	mmu-mir-128-2
chr9	-	115219232	chr9	-	115310114	p1@Stt3b	NM_024222	intronic	mmu-novelmir-789,mmu-novelmir-788
chr9	-	115219586	chr9	-	115310468	p2@Stt3b	NM_024222	intronic	mmu-novelmir-790
chr9	-	116084334	chr9	-	116175216	p1@Tgfbr2	NM_009371	intronic	mmu-novelmir-791
chr9	+	118835633	chr9	+	118926515	p1@Ctdspl	NM_133710	intronic	mmu-mir-26a-1
chr9	+	120842606	chr9	+	120933488	p1@Ctnnb1	ENSMUST00000154687.4	intronic	mmu-mir-7090
chr9	+	121669151	chr9	+	121760033	p1@Zfp651	ENSMUST00000093772.3	intronic	mmu-novelmir-793
chr9	-	122203492	chr9	-	122294374	p1@Ano10	NM_133979	intronic	mmu-mir-8106
chr9	+	122591295	chr9	+	122682177	p@chr9:122591290..122591302,+	curation	intergenic	mmu-mir-138-1
chr9	+	122860183	chr9	+	122951065	p1@Kif15	NM_010620	intronic	mmu-novelmir-794
chr9	-	123760996	chr9	-	123851875	p1@Fyco1	ENSMUST00000184082.1	intronic	mmu-novelmir-796,mmu-novelmir-795
chr10	-	5959387	chr10	+	4387154	p@chr10:5959365..5959414,-	XM_984054	intronic	mmu-novelmir-797
chr10	-	6373416	chr10	+	3973125	p1@Mthfd1l	ENSMUST00000120585.4	intronic	mmu-novelmir-798
chr10	+	7552240	chr10	+	7832442	p1@Zc3h12d	NM_172785	intronic	mmu-mir-5104
chr10	-	9621020	chr10	-	9901222	p1@Stxbp5	ENSMUST00000141722.4	intronic	mmu-novelmir-799
chr10	+	13273026	chr10	+	13553220	p1@Adat2	NM_025748	intronic	mmu-novelmir-800
chr10	+	18110181	chr10	+	18390375	p10@Nhsl1	ENSMUST00000159299.4	intronic	mmu-novelmir-801
chr10	+	22026522	chr10	+	22306716	p2@C920009B18Rik	ENSMUST00000178026.1	intronic	mmu-novelmir-802
chr10	-	22451124	chr10	-	22731318	p1@Tbpl1	ENSMUST00000138022.1	intronic	mmu-mir-7663
chr10	+	24589843	chr10	+	24870037	p1@Med23	NM_027347	intronic	mmu-mir-6905
chr10	-	26093886	chr10	-	26374080	p2@L3mbtl3	ENSMUST00000105519.6	intronic	mmu-novelmir-805
chr10	+	39451924	chr10	+	39732118	p1@Rev3l	ENSMUST00000019986.9	intronic	mmu-novelmir-807
chr10	-	39862060	chr10	-	40142254	p1@Slc16a10	ENSMUST00000092566.6	intronic	mmu-novelmir-808
chr10	+	40069169	chr10	+	40349363	p1@Cdk19	NM_198164	intronic	mmu-novelmir-809,mmu-novelmir-810
chr10	-	41405797	chr10	-	41685991	p@chr10:41405791..41405808,-	ENSMUST00000019955.12	intronic	mmu-novelmir-811
chr10	-	42894337	chr10	-	43174531	p1@Sobp	NM_175407	intronic	mmu-novelmir-813,mmu-novelmir-812
chr10	+	43988287	chr10	+	44268481	p1@Atg5	NM_053069	intronic	mmu-mir-1929
chr10	+	57206185	chr10	+	57486379	p1@Hsf2	ENSMUST00000079833.4	intronic	mmu-novelmir-816
chr10	+	59568994	chr10	+	60106246	p1@Spock2	NM_052994	intronic	mmu-mir-6906
chr10	-	59682036	chr10	-	60219288	p1@Chst3	ENSMUST00000135158.5	intronic	mmu-novelmir-817
chr10	-	61693972	chr10	-	62231224	p1@Tspan15	NM_197996	intronic	mmu-mir-7662
chr10	-	61912468	chr10	-	62449720	p1@Supv3l1	ENSMUST00000020273.12	intronic	mmu-novelmir-819
chr10	-	62255030	chr10	-	62792282	p1@Ccar1	NM_026201	intronic	mmu-novelmir-820
chr10	+	62443000	chr10	+	62980252	p1@Rufy2	ENSMUST00000143594.4	intronic	mmu-novelmir-822
chr10	+	72117628	chr10	+	72654880	p1@Zwint	NM_025635	intronic	mmu-novelmir-828
chr10	+	74523319	chr10	+	75060574	p1@Bcr	NM_001081412	intronic	mmu-novelmir-829
chr10	+	75417288	chr10	+	75954543	p1@Gm5134	ENSMUST00000099577.3	intronic	mmu-mir-6409
chr10	-	75700582	chr10	-	76237837	p1@Prmt2	ENSMUST00000099572.6	intronic	mmu-mir-678
chr10	+	77085046	chr10	+	77622301	p1@Ube2g2	ENSMUST00000172813.1	intronic	mmu-mir-1930
chr10	-	77815107	chr10	-	78352362	p1@Agpat3	ENSMUST00000001240.8	intronic	mmu-novelmir-831,mmu-mir-7659
chr10	-	77875751	chr10	-	78413006	p1@Rrp1	NM_010925	intronic	mmu-novelmir-832,mmu-mir-6907
chr10	-	77927668	chr10	-	78464923	p1@Pdxk	NM_172134	intronic	mmu-novelmir-833,mmu-mir-6908
chr10	-	78996502	chr10	-	79533757	p1@Ppap2c	ENSMUST00000166804.1	intronic	mmu-mir-6909
chr10	+	79317413	chr10	+	79854668	p1@Ptbp1	ENSMUST00000095457.7	intronic	mmu-mir-6910
chr10	-	79565442	chr10	-	80102697	p1@Sbno2	ENSMUST00000042771.7	intronic	mmu-novelmir-835
chr10	-	79602098	chr10	-	80139353	p1@Dos	ENSMUST00000105369.4	intronic	mmu-novelmir-836
chr10	+	79605132	chr10	+	80142387	p1@Atp5d	ENSMUST00000105366.1	intronic	mmu-novelmir-837
chr10	+	79727764	chr10	+	80265019	p1@Dazap1	ENSMUST00000105361.6	intronic	mmu-mir-6911
chr10	-	79896378	chr10	-	80433633	p1@Tcf3	ENSMUST00000105340.4	intronic	mmu-novelmir-838
chr10	-	80040039	chr10	-	80577294	p1@Klf16	NM_078477	intronic	mmu-novelmir-839
chr10	+	80065637	chr10	+	80602892	p1@Adat3,p1@Scamp4	NM_019575	intronic	mmu-mir-6912
chr10	-	80139038	chr10	-	80676293	p1@Mknk2	ENSMUST00000200082.1	intronic	mmu-novelmir-840
chr10	-	80260999	chr10	-	80798254	p1@Plekhj1	NM_023900	intronic	mmu-novelmir-842
chr10	+	80289431	chr10	+	80826686	p1@Oaz1	ENSMUST00000180036.4	intronic	mmu-mir-1982
chr10	+	80532854	chr10	+	81070109	p1@Thop1	NM_022653	intronic	mmu-novelmir-843
chr10	+	80565430	chr10	+	81102685	p@chr10:80565428..80565433,+	curation	intergenic	mmu-mir-5615-2
chr10	+	80599323	chr10	+	81136578	p1@Zbtb7a	ENSMUST00000121840.4	intronic	mmu-novelmir-844
chr10	+	80639391	chr10	+	81176646	p1@Eef2	NM_007907	intronic	mmu-novelmir-845
chr10	-	80693531	chr10	-	81230786	p1@Atcay	ENSMUST00000146030.4	intronic	mmu-novelmir-846
chr10	+	80730995	chr10	+	81268250	p1@Apba3	NM_018758	intronic	mmu-mir-3057
chr10	-	80813197	chr10	-	81350452	p1@Hmg20b	ENSMUST00000105324.5	intronic	mmu-novelmir-847
chr10	-	80841167	chr10	-	81378422	p1@Fzr1	ENSMUST00000020457.10	intronic	mmu-novelmir-848
chr10	+	80847183	chr10	+	81384438	p1@Dohh	ENSMUST00000072751.9	intronic	mmu-mir-6913
chr10	-	80889902	chr10	-	81427157	p1@Nfic	NM_026756	intronic	mmu-mir-1191b
chr10	-	81007907	chr10	-	81545162	p1@Gna11	ENSMUST00000043604.5	intronic	mmu-novelmir-850
chr10	-	84647798	chr10	-	85185053	p1@Cry1	NM_007771	intronic	mmu-novelmir-852
chr10	+	90039463	chr10	+	90576718	p1@Anks1b	ENSMUST00000182430.4	intronic	mmu-novelmir-854,mmu-novelmir-855
chr10	-	90634323	chr10	-	91171578	p1@Tmpo	NM_001080132	intronic	mmu-novelmir-856
chr10	-	91627915	chr10	-	92165170	p1@Rmst	curation	intronic	mmu-mir-1251,mmu-mir-135a-2
chr10	+	92623619	chr10	+	93160874	p1@Cdk17	ENSMUST00000069965.7	intronic	mmu-mir-1931
chr10	-	93498494	chr10	-	94035749	p1@Vezt	ENSMUST00000119818.4	intronic	mmu-mir-331
chr10	-	94407479	chr10	-	94944845	p1@Plxnc1	NM_018797	intronic	mmu-novelmir-858
chr10	-	95026780	chr10	-	95564146	p1@Nudt4	NM_027722	intronic	mmu-mir-3058
chr10	+	98377329	chr10	+	98914695	p1@Atp2b1	ENSMUST00000020107.7	intronic	mmu-novelmir-861
chr10	+	101144273	chr10	+	101681639	p3@Mgat4c	ENSMUST00000134930.4	intronic	mmu-mir-3059
chr10	-	110944381	chr10	-	111507325	p@chr10:110944372..110944394,-	ENSMUST00000186844.1	intergenic	mmu-novelmir-863
chr10	-	117229758	chr10	-	117792702	p1@Nup107	ENSMUST00000167943.4	intronic	mmu-novelmir-864
chr10	+	117578889	chr10	+	118141833	p1@Mdm1	NM_148922	intronic	mmu-novelmir-865
chr10	-	118677125	chr10	-	119240069	p1@Cand1	ENSMUST00000020315.9	intronic	mmu-novelmir-866
chr10	-	119913320	chr10	-	120476264	p1@Hmga2	ENSMUST00000072777.10	intronic	mmu-mir-763
chr10	+	122115834	chr10	+	122678778	p1@Ppm1h	ENSMUST00000161487.4	intronic	mmu-mir-8104
chr10	-	122423114	chr10	-	122986058	p1@Mirlet7i	XM_001479141	intronic	mmu-let-7i
chr10	+	126415994	chr10	+	126978938	p1@Ctdsp2	ENSMUST00000105256.5	intronic	mmu-mir-26a-2,mmu-mir-546,mmu-novelmir-870
chr10	+	127520362	chr10	+	128083306	p1@Atp5b	NM_016774	intronic	mmu-mir-677
chr10	+	127814194	chr10	+	128377138	p1@Ankrd52	NM_172790	intronic	mmu-mir-6914,mmu-mir-6915
chr10	-	127962927	chr10	-	128525871	p1@Esyt1	NM_011843	intronic	mmu-mir-6916
chr10	-	128026691	chr10	-	128589635	p1@Erbb3	ENSMUST00000082059.6	intronic	mmu-mir-6917
chr11	-	3271346	chr11	-	3371343	p1@Limk2	ENSMUST00000101640.6	intronic	mmu-novelmir-875
chr11	-	3439257	chr11	-	3539254	p1@Smtn	ENSMUST00000154861.4	intronic	mmu-novelmir-876
chr11	+	4035178	chr11	+	4135175	p1@Rnf215	NM_027859	intronic	mmu-mir-3060
chr11	-	4494793	chr11	-	4594790	p1@Mtmr3	NM_028860	intronic	mmu-novelmir-877
chr11	+	4537753	chr11	+	4637750	p1@Ascc2	ENSMUST00000070257.10	intronic	mmu-novelmir-878
chr11	+	4773991	chr11	+	4873988	p1@Nipsnap1	ENSMUST00000136552.4	intronic	mmu-mir-6918
chr11	-	4999070	chr11	-	5099067	p1@Ewsr1	ENSMUST00000093365.8	intronic	mmu-novelmir-879
chr11	+	6289376	chr11	+	6389373	p1@Zmiz2	NM_028601	intronic	mmu-mir-7651
chr11	-	6420904	chr11	-	6520901	p1@Myo1g	ENSMUST00000144725.4	intronic	mmu-novelmir-880
chr11	-	8564543	chr11	-	8664540	p1@Tns3	NM_001083587	intronic	mmu-novelmir-881
chr11	-	11708933	chr11	-	11808930	p1@Fignl1	NM_021891	intronic	mmu-novelmir-882
chr11	-	11798147	chr11	-	11898144	p1@Ddc	ENSMUST00000178704.4	intronic	mmu-novelmir-883
chr11	-	11937402	chr11	-	12037399	p1@Grb10	ENSMUST00000093321.8	intronic	mmu-novelmir-884
chr11	-	21270481	chr11	-	21370478	p1@Ugp2	ENSMUST00000102875.7	intronic	mmu-mir-1933
chr11	+	28663471	chr11	+	28763471	p1@Mir217	ENSMUST00000138164.1	intergenic	mmu-mir-217
chr11	+	29426445	chr11	+	29526445	p1@Mtif2	ENSMUST00000020749.9	intronic	mmu-novelmir-887
chr11	-	30168144	chr11	-	30268144	p1@Spnb2	ENSMUST00000006629.10	intronic	mmu-novelmir-888
chr11	+	31772103	chr11	+	31872103	p3@Cpeb4	NM_026252	intronic	mmu-novelmir-889
chr11	+	32355426	chr11	+	32455426	p1@Ubtd2	NM_173784	intronic	mmu-novelmir-890
chr11	+	34934613	chr11	+	35121111	p1@Slit3	ENSMUST00000069837.3	intronic	mmu-mir-218-2
chr11	+	35583094	chr11	+	35769592	p2@Pank3	NM_145962	intronic	mmu-novelmir-891
chr11	+	35583358	chr11	+	35769856	p1@Pank3	NM_145962	intronic	mmu-mir-103-1
chr11	-	40508413	chr11	-	40694911	p2@Mat2b	ENSMUST00000135617.1	intronic	mmu-novelmir-893
chr11	-	43198652	chr11	-	43385150	p@chr11:43198643..43198660,-	curation	intergenic	mmu-mir-146a
chr11	+	45869564	chr11	+	46056062	p1@Adam19	ENSMUST00000011400.7	intronic	mmu-mir-8100
chr11	-	46202986	chr11	-	46389484	p1@Itk	ENSMUST00000109237.5	intronic	mmu-novelmir-896
chr11	+	49838848	chr11	+	50025346	p1@Rnf130	ENSMUST00000054684.10	intronic	mmu-mir-340
chr11	+	50038839	chr11	+	50225337	p1@Mgat4b	ENSMUST00000041725.10	intronic	mmu-mir-6919,mmu-novelmir-897
chr11	-	50105836	chr11	-	50292334	p1@Maml1	ENSMUST00000059458.4	intronic	mmu-novelmir-898
chr11	+	50191270	chr11	+	50377768	p1@Hnrnph1	ENSMUST00000150153.4	intronic	mmu-novelmir-899
chr11	+	51912329	chr11	+	52098827	p1@Ppp2ca	ENSMUST00000020608.2	intronic	mmu-mir-3061,mmu-novelmir-901
chr11	+	53164272	chr11	+	53350770	p1@Aff4	NM_033565	intronic	mmu-mir-6920
chr11	+	54184111	chr11	+	54370609	p1@4930404A10Rik	ENSMUST00000143919.1	intronic	mmu-novelmir-903
chr11	-	54674099	chr11	-	54860597	p1@Lyrm7	ENSMUST00000141703.1	intronic	mmu-novelmir-904
chr11	+	55283239	chr11	+	55469737	p2@G3bp1	ENSMUST00000018727.3	intronic	mmu-mir-7652
chr11	-	58752399	chr11	-	58938897	p1@Rnf187	ENSMUST00000094151.5	intronic	mmu-novelmir-906
chr11	+	59476009	chr11	+	59662507	p1@Mprip	ENSMUST00000116371.4	intronic	mmu-novelmir-907
chr11	-	59553650	chr11	-	59740148	p1@1700007J10Rik	ENSMUST00000153431.1	intergenic	mmu-novelmir-908
chr11	-	60023921	chr11	-	60210419	p1@Srebf1	ENSMUST00000144942.1	intronic	mmu-mir-6922,mmu-mir-6921
chr11	-	60034096	chr11	-	60220594	p2@Srebf1	NM_011480	intronic	mmu-novelmir-909
chr11	+	60351516	chr11	+	60538014	p1@Alkbh5	NM_172943	intronic	mmu-novelmir-911
chr11	+	60513292	chr11	+	60699790	p1@Llgl1	NM_008502	intronic	mmu-novelmir-912
chr11	+	60541945	chr11	+	60728443	p1@Smcr7	ENSMUST00000154890.1	intronic	mmu-mir-5100
chr11	+	62574533	chr11	+	62761031	p1@ENSMUST00000128292	ENSMUST00000128292.1	intergenic	mmu-novelmir-913
chr11	+	62693015	chr11	+	62879513	p1@Fam18b,p1@LOC100045386	NM_026210	intronic	mmu-novelmir-914
chr11	-	65601799	chr11	-	65788297	p1@Map2k4	NM_009157	intronic	mmu-mir-744
chr11	+	66891802	chr11	+	67078300	p1@Myh3	XM_354614	intronic	mmu-mir-6923
chr11	-	68200497	chr11	-	68386995	p1@Ntn1	NM_008744	intronic	mmu-novelmir-916,mmu-novelmir-915
chr11	-	68821962	chr11	-	69008460	p1@Pfas	XM_111232	intronic	mmu-mir-3062
chr11	+	69475865	chr11	+	69662363	p@chr11:69475855..69475882,+	curation	intergenic	mmu-mir-1934
chr11	-	69709042	chr11	-	69895540	p1@Acap1	NM_153788	intronic	mmu-mir-6924
chr11	+	69715364	chr11	+	69901862	p1@Neurl4	NM_001013414	intronic	mmu-novelmir-918
chr11	+	69814097	chr11	+	70000595	p1@Dvl2	ENSMUST00000102575.5	intronic	mmu-mir-324
chr11	+	70046610	chr11	+	70233108	p@chr11:70046599..70046626,+	curation	intergenic	mmu-mir-497a,mmu-mir-195a
chr11	+	70246184	chr11	+	70432682	p1@Arrb2	ENSMUST00000128748.4	intronic	mmu-mir-7115,mmu-novelmir-920
chr11	-	70460486	chr11	-	70646984	p1@Slc25a11	NM_024211	intronic	mmu-novelmir-921
chr11	+	70514011	chr11	+	70700509	p1@Kif1c	ENSMUST00000152618.5	intronic	mmu-mir-6925
chr11	-	74710571	chr11	-	74897069	p1@Sgsm2	ENSMUST00000057631.8	intronic	mmu-novelmir-923,mmu-mir-6926
chr11	+	74986065	chr11	+	75172563	p1@ENSMUST00000134252	ENSMUST00000134252.1	intergenic	mmu-mir-212,mmu-mir-132
chr11	+	75275176	chr11	+	75461674	p1@ENSMUST00000134345	ENSMUST00000134345.1	intergenic	mmu-mir-22,mmu-novelmir-924
chr11	+	75300335	chr11	+	75486833	p1@Prpf8	ENSMUST00000102510.4	intronic	mmu-novelmir-925
chr11	+	75345202	chr11	+	75531700	p1@Slc43a2	ENSMUST00000042561.10	intronic	mmu-mir-3971
chr11	+	75401598	chr11	+	75588096	p1@Pitpna	ENSMUST00000143219.4	intronic	mmu-novelmir-926
chr11	+	75546441	chr11	+	75732939	p1@Ywhae	NM_009536	intronic	mmu-novelmir-927
chr11	-	76891924	chr11	-	77078422	p1@Ccdc55	NM_001012309	intronic	mmu-mir-423
chr11	+	77306790	chr11	+	77493288	p2@Git1	NM_001004144	intronic	mmu-novelmir-930
chr11	+	77576808	chr11	+	77763306	p1@Myo18a	ENSMUST00000100795.3	intronic	mmu-novelmir-933
chr11	-	77707351	chr11	-	77893849	p2@Pipox	ENSMUST00000017597.4	intronic	mmu-novelmir-934
chr11	+	77744419	chr11	+	77930917	p1@Sez6	NM_021286	intronic	mmu-novelmir-935
chr11	+	77886154	chr11	+	78072652	p1@Mir144,p1@Mir451	AK158085	intergenic	mmu-mir-144,mmu-mir-451a
chr11	+	77992263	chr11	+	78178761	p1@Tlcd1	ENSMUST00000108338.1	intronic	mmu-mir-7653
chr11	+	78059493	chr11	+	78245991	p1@Sdf2	NM_009143	intronic	mmu-novelmir-937
chr11	+	78075266	chr11	+	78261764	p1@2610507B11Rik	NM_001002004	intronic	mmu-novelmir-938
chr11	+	79153176	chr11	+	79339674	p1@Nf1	ENSMUST00000108251.5	intronic	mmu-novelmir-939,mmu-novelmir-940
chr11	+	79524870	chr11	+	79711368	p@chr11:79524861..79524877,+	curation	intergenic	mmu-mir-193a
chr11	-	79775893	chr11	-	79962391	p1@Utp6	ENSMUST00000043152.5	intronic	mmu-novelmir-942,mmu-novelmir-941
chr11	+	79806589	chr11	+	79993087	p1@Suz12	NM_199196	intronic	mmu-novelmir-944
chr11	+	79902936	chr11	+	80089434	p1@Atad5	NM_001029856	intronic	mmu-novelmir-945
chr11	+	80114383	chr11	+	80300881	p1@Rhbdl3	ENSMUST00000017836.7	intronic	mmu-novelmir-946
chr11	-	82804653	chr11	-	82991151	p1@LOC100505167,p1@Slfn9	ENSMUST00000138797.1	intronic	mmu-mir-7679
chr11	+	84693415	chr11	+	84879913	p2@Myo19	ENSMUST00000093969.7	intronic	mmu-novelmir-947
chr11	-	86071067	chr11	-	86257565	p1@Ints2	NM_027421	intronic	mmu-novelmir-948
chr11	+	86298191	chr11	+	86484689	p1@Rnft1	ENSMUST00000125675.1	intronic	mmu-novelmir-949
chr11	-	86400432	chr11	-	86586930	p2@Vmp1	NM_029478	intronic	mmu-mir-21a
chr11	+	86922763	chr11	+	87109261	p1@Fam33a	NM_025377	intronic	mmu-mir-301a
chr11	+	87569079	chr11	+	87755577	p1@Mir142	ENSMUST00000123700.1	intergenic	mmu-mir-142a
chr11	+	88860732	chr11	+	88999418	p1@Trim25	ENSMUST00000107896.6	intronic	mmu-novelmir-955
chr11	-	93747025	chr11	-	93885711	p1@Utp18	NM_001013375	intronic	mmu-novelmir-956
chr11	+	94871307	chr11	+	95009993	p1@Samd14	NM_146025	intronic	mmu-novelmir-958
chr11	+	95574201	chr11	+	95712887	p2@Phospho1	ENSMUST00000133070.4	intronic	mmu-novelmir-960
chr11	-	95867258	chr11	-	96005944	p1@Igf2bp1	ENSMUST00000013559.2	intronic	mmu-novelmir-962,mmu-novelmir-961,mmu-mir-3063
chr11	+	96176120	chr11	+	96314806	p@chr11:96176110..96176149,+	curation	intergenic	mmu-mir-10a
chr11	+	96711190	chr11	+	96849876	p1@Copz2	NM_019877	intronic	mmu-mir-152
chr11	-	96777824	chr11	-	96916510	p1@Cdk5rap3	ENSMUST00000103152.7	intronic	mmu-novelmir-964
chr11	+	96912158	chr11	+	97050844	p1@Osbpl7	NM_001081434	intronic	mmu-mir-8103
chr11	-	97011375	chr11	-	97150061	p1@Tbkbp1	ENSMUST00000107613.4	intronic	mmu-mir-7235
chr11	-	97436479	chr11	-	97575165	p1@Srcin1	NM_018873	intronic	mmu-novelmir-965
chr11	+	97524536	chr11	+	97663222	p1@Mllt6	NM_139311	intronic	mmu-mir-6927
chr11	+	97564739	chr11	+	97703425	p1@LOC100505005,p1@Psmb3	NM_011971	intronic	mmu-novelmir-966
chr11	+	97606250	chr11	+	97744936	p@chr11:97606238..97606261,+	XM_001476201	intronic	mmu-mir-8102
chr11	+	98114390	chr11	+	98253076	p@chr11:98114387..98114392,+	ENSMUST00000147441.4	intronic	mmu-mir-5119
chr11	-	98590733	chr11	-	98729419	p1@Med24	ENSMUST00000100500.5	intronic	mmu-novelmir-967
chr11	-	98885504	chr11	-	99024190	p1@Top2a	ENSMUST00000068031.7	intronic	mmu-novelmir-968
chr11	-	100389183	chr11	-	100527869	p1@Acly	NM_134037	intronic	mmu-novelmir-971,mmu-mir-7116
chr11	+	100870831	chr11	+	101009517	p1@Atp6v0a1	ENSMUST00000168757.5	intronic	mmu-mir-6928
chr11	-	100981155	chr11	-	101119841	p1@Fam134c	NM_028933	intronic	mmu-novelmir-972
chr11	-	101285982	chr11	-	101424668	p2@1700113I22Rik,p2@Aarsd1	ENSMUST00000107252.5	intronic	mmu-mir-6929
chr11	-	101327513	chr11	-	101466199	p1@Vat1	NM_012037	intronic	mmu-novelmir-974
chr11	-	101646580	chr11	-	101785266	p1@Etv4	NM_008815	intronic	mmu-novelmir-975
chr11	-	102091453	chr11	-	102230139	p1@Hdac5	ENSMUST00000124077.4	intronic	mmu-mir-8101
chr11	-	102268822	chr11	-	102407508	p1@Slc25a39	ENSMUST00000153395.4	intronic	mmu-mir-6930
chr11	-	102878438	chr11	-	103017124	p1@Dcakd	NM_026551	intronic	mmu-mir-6931
chr11	-	103559010	chr11	-	103697696	p1@Gosr2	NM_019650	intronic	mmu-novelmir-977
chr11	-	103815338	chr11	-	103954024	p1@Nsf	ENSMUST00000145126.4	intronic	mmu-novelmir-978
chr11	+	105153970	chr11	+	105292656	p1@Mrc2	NM_008626	intronic	mmu-novelmir-979,mmu-novelmir-980
chr11	+	105945901	chr11	+	106084587	p1@Map3k3	ENSMUST00000002044.9	intronic	mmu-novelmir-981
chr11	-	106474281	chr11	-	106612967	p1@Tex2	NM_198292	intronic	mmu-novelmir-982
chr11	-	106649807	chr11	-	106788493	p1@Ddx5,p1@Gm12183	NM_007840	intronic	mmu-mir-3064
chr11	+	107409247	chr11	+	107547933	p1@Helz	ENSMUST00000100305.4	intronic	mmu-mir-6932,mmu-novelmir-983
chr11	-	107656020	chr11	-	107794706	p1@Cacng4	ENSMUST00000021066.3	intronic	mmu-novelmir-984
chr11	-	109334541	chr11	-	109473227	p2@Slc16a6	NM_134038	intronic	mmu-novelmir-985
chr11	-	113427068	chr11	-	113565754	p1@Slc39a11	ENSMUST00000071539.6	intronic	mmu-novelmir-987
chr11	-	113613114	chr11	-	113751800	p1@Cdc42ep4	ENSMUST00000053536.4	intronic	mmu-novelmir-989
chr11	-	115397571	chr11	-	115536257	p1@Sumo2	ENSMUST00000153892.1	intronic	mmu-novelmir-991,mmu-novelmir-990
chr11	+	115626746	chr11	+	115765432	p1@2310067B10Rik	NM_028014	intronic	mmu-mir-5621
chr11	-	115674900	chr11	-	115813586	p1@Caskin2	NM_080643	intronic	mmu-novelmir-992
chr11	-	116351662	chr11	-	116490348	p1@Prpsap1	ENSMUST00000106391.4	intronic	mmu-novelmir-994
chr11	+	116938102	chr11	+	117076788	p1@2810008D09Rik	ENSMUST00000145438.1	intergenic	mmu-mir-6516,mmu-novelmir-995
chr11	+	117516127	chr11	+	117654813	p1@Tnrc6c	ENSMUST00000106344.4	intronic	mmu-novelmir-996
chr11	+	117848180	chr11	+	117986866	p1@Pgs1	NM_133757	intronic	mmu-mir-6933,mmu-novelmir-997
chr11	-	119089790	chr11	-	119228476	p1@Tbc1d16	NM_172443	intronic	mmu-mir-6934
chr11	+	119090437	chr11	+	119229123	p1@Ccdc40	ENSMUST00000053440.7	intronic	mmu-novelmir-999,mmu-novelmir-1000
chr11	+	119129342	chr11	+	119268028	p1@Gaa	ENSMUST00000026666.9	intronic	mmu-novelmir-1001
chr11	-	119908466	chr11	-	120047152	p2@Aatk	ENSMUST00000103020.4	intronic	mmu-mir-338
chr11	-	120209810	chr11	-	120348496	p2@Actg1,p2@Gm12715	ENSMUST00000131103.5	intronic	mmu-mir-6935
chr11	-	120298989	chr11	-	120437675	p1@Nploc4	NM_199469	intronic	mmu-novelmir-1002
chr11	-	120486299	chr11	-	120624985	p1@Sirt7	ENSMUST00000153532.4	intronic	mmu-novelmir-1003,mmu-mir-6936
chr11	+	120534366	chr11	+	120673052	p1@Aspscr1	ENSMUST00000106158.5	intronic	mmu-novelmir-1004
chr11	-	120657709	chr11	-	120796395	p1@Dus1l	NM_026824	intronic	mmu-novelmir-1006,mmu-novelmir-1005
chr11	-	120685420	chr11	-	120824106	p1@Fasn	ENSMUST00000055655.7	intronic	mmu-novelmir-1008,mmu-novelmir-1007
chr11	-	121249535	chr11	-	121388221	p1@Rab40b	ENSMUST00000124639.1	intronic	mmu-mir-7236
chr12	+	11272956	chr12	+	11266150	p1@Smc6	NM_025695	intronic	mmu-mir-7675
chr12	-	13255987	chr12	-	13249181	p1@Ddx1	NM_134040	intronic	mmu-novelmir-1009
chr12	-	15823653	chr12	-	15816847	p1@Trib2	NM_144551	intronic	mmu-novelmir-1011,mmu-mir-6387
chr12	+	17355266	chr12	+	17348460	p1@Nol10	ENSMUST00000046011.10	intronic	mmu-mir-3066
chr12	+	20423577	chr12	+	20417716	p@chr12:20423539..20423586,+	XM_001004798	intronic	mmu-novelmir-1013
chr12	-	21840342	chr12	-	21784475	p1@uc007nea.1	XR_035730	intergenic	mmu-novelmir-1014
chr12	+	25257148	chr12	+	24572283	p1@Grhl1	ENSMUST00000085553.8	intronic	mmu-novelmir-1015
chr12	-	27100162	chr12	-	26415297	p1@Rnf144a	NM_080563	intronic	mmu-mir-6538
chr12	+	29360096	chr12	+	28675231	p1@Adi1	ENSMUST00000020957.9	intronic	mmu-mir-6937
chr12	+	33832671	chr12	+	33147806	p1@Atxn7l1	ENSMUST00000136644.4	intronic	mmu-novelmir-1016
chr12	-	40949772	chr12	-	40223185	p1@Ifrd1	ENSMUST00000170752.1	intronic	mmu-mir-1938
chr12	+	41172675	chr12	+	40446088	p1@Dock4	NM_172803	intronic	mmu-novelmir-1018
chr12	-	55757495	chr12	-	54656508	p1@1110002B05Rik	NM_134054	intronic	mmu-novelmir-1022,mmu-mir-1892
chr12	+	66137321	chr12	+	65036334	p1@Prpf39	ENSMUST00000120580.4	intronic	mmu-novelmir-1024
chr12	-	70891253	chr12	-	69790266	p@chr12:70891242..70891260,-	NM_183294	intronic	mmu-mir-681
chr12	-	71212990	chr12	-	70112003	p1@Nin	NM_008697	intronic	mmu-novelmir-1025
chr12	+	71926490	chr12	+	70825503	p1@Frmd6,p1@Gm5780	NM_028127	intronic	mmu-novelmir-1026
chr12	+	74685783	chr12	+	73584796	p1@Prkch	ENSMUST00000021527.11	intronic	mmu-novelmir-1029
chr12	-	76697200	chr12	-	75596213	p1@Ppp2r5e	NM_012024	intronic	mmu-novelmir-1030
chr12	+	76919310	chr12	+	75818323	p1@Syne2	ENSMUST00000143031.4	intronic	mmu-mir-5101
chr12	-	77923477	chr12	-	76822490	p1@Rab15	NM_134050	intronic	mmu-novelmir-1031
chr12	-	78063186	chr12	-	76962199	p1@Max	NM_008558	intronic	mmu-novelmir-1032
chr12	-	81537544	chr12	-	80436557	p1@Dcaf5	NM_177267	intronic	mmu-mir-1843a
chr12	+	82127798	chr12	+	81026811	p1@Smoc1	ENSMUST00000110347.5	intronic	mmu-mir-3067
chr12	+	84973193	chr12	+	83632243	p1@Rbm25	ENSMUST00000048155.12	intronic	mmu-novelmir-1034
chr12	-	85559833	chr12	-	84218883	p1@C130039O16Rik	XM_001477247	intronic	mmu-novelmir-1035
chr12	-	86611549	chr12	-	85270599	p1@Mlh3	ENSMUST00000166821.4	intronic	mmu-mir-6938
chr12	+	87423524	chr12	+	86082574	p1@1700019E19Rik	NM_029601	intronic	mmu-novelmir-1036
chr12	-	88784783	chr12	-	87443833	p1@Alkbh1	ENSMUST00000162986.1	intronic	mmu-mir-3068
chr12	-	101121631	chr12	-	99883421	p1@2610021K21Rik	NM_030172	intronic	mmu-novelmir-1038
chr12	-	101963278	chr12	-	100725068	p1@Rps6ka5	NM_153587	intronic	mmu-novelmir-1039
chr12	-	102267101	chr12	-	101028891	p1@Ccdc88c	NM_026681	intronic	mmu-mir-1190
chr12	-	102321894	chr12	-	101083684	p1@Smek1	ENSMUST00000163095.4	intronic	mmu-novelmir-1040
chr12	-	103943144	chr12	-	102704934	p1@Itpk1	ENSMUST00000046518.8	intronic	mmu-novelmir-1041,mmu-mir-1936
chr12	-	106248255	chr12	-	105010045	p1@4831426I19Rik	NM_172500	intronic	mmu-novelmir-1042
chr12	-	106270489	chr12	-	105032279	p1@Snhg10	NR_003145	intergenic	mmu-mir-3069
chr12	-	109513603	chr12	-	108275393	p1@Ccdc85c	XM_994648	intronic	mmu-novelmir-1044
chr12	+	109874013	chr12	+	108635803	p3@Evl	ENSMUST00000172409.1	intronic	mmu-mir-342
chr12	+	110074244	chr12	+	108836034	p@chr12:110074237..110074298,+	ENSMUST00000221453.1	intergenic	mmu-mir-345
chr12	+	110779206	chr12	+	109540996	p4@Meg3	curation	intergenic	mmu-mir-770,mmu-mir-673,mmu-mir-493,mmu-mir-337,mmu-mir-540,mmu-mir-665,mmu-mir-431,mmu-mir-433,mmu-mir-127,mmu-mir-434,mmu-mir-136,mmu-mir-341,mmu-mir-1188,mmu-mir-379,mmu-mir-411,mmu-mir-299a,mmu-mir-380,mmu-mir-323,mmu-mir-758,mmu-mir-329,mmu-mir-494,mmu-mir-679,mmu-mir-1193,mmu-mir-666,mmu-mir-543,mmu-mir-495,mmu-mir-667,mmu-mir-376b,mmu-mir-376a,mmu-mir-381,mmu-mir-487b,mmu-mir-539,mmu-mir-5…
chr12	-	110838551	chr12	-	109600341	p1@Rtl1	ENSMUST00000149046.2	intronic	mmu-novelmir-1045,mmu-mir-3071
chr12	-	111517146	chr12	-	110278936	p@chr12:111517142..111517166,-	AY077459	intronic	mmu-mir-1247
chr12	+	112404668	chr12	+	111166457	p1@Traf3	ENSMUST00000021706.7	intronic	mmu-novelmir-1048
chr12	+	112997096	chr12	+	111758885	p1@Klc1	NM_001025360	intronic	mmu-novelmir-1050
chr12	+	113345079	chr12	+	112106868	p1@Aspg	NM_001081169	intronic	mmu-mir-3073a
chr12	+	113368993	chr12	+	112130782	p1@Mir203	curation	intergenic	mmu-mir-203
chr12	-	113912438	chr12	-	112674227	p1@Akt1	NM_009652	intronic	mmu-mir-6939
chr12	+	113960395	chr12	+	112722184	p1@AW555464	ENSMUST00000101018.6	intronic	mmu-mir-6940
chr12	-	114168028	chr12	-	112929817	p1@Jag2	NM_010588	intronic	mmu-mir-6941
chr12	+	114239086	chr12	+	113000875	p@chr12:114239082..114239097,+	ENSMUST00000180971.1	intronic	mmu-novelmir-1052
chr12	-	115707794	chr12	-	114469583	p1@ENSMUST00000109711	ENSMUST00000195325.1	intergenic	mmu-mir-7094-1
chr12	-	115752024	chr12	-	114513813	p1@ENSMUST00000103494	ENSMUST00000191803.1	intergenic	mmu-mir-7094-2
chr12	+	117724229	chr12	+	116485756	p1@Ptprn2	ENSMUST00000190247.3	intronic	mmu-mir-153
chr13	-	6647971	chr13	-	6648725	p1@Pfkp	NM_019703	intronic	mmu-novelmir-1058,mmu-novelmir-1057
chr13	+	13682677	chr13	+	13590410	p1@Lyst	NM_010748	intronic	mmu-novelmir-1059,mmu-novelmir-1060
chr13	-	21494582	chr13	-	21402713	p1@Zkscan3	ENSMUST00000070785.11	intronic	mmu-mir-6942
chr13	+	21533035	chr13	+	21441166	p@chr13:21533002..21533046,+	ENSMUST00000122926.1	intergenic	mmu-mir-1896
chr13	-	22027347	chr13	-	21935478	p@chr13:22027345..22027367,-	XR_031906	intergenic	mmu-mir-1983
chr13	-	24853779	chr13	-	24761910	p1@Gmnn	ENSMUST00000177253.1	intronic	mmu-novelmir-1064
chr13	+	25035420	chr13	+	24943551	p1@Gpld1	NM_008156	intronic	mmu-novelmir-1065
chr13	-	28977213	chr13	-	28885344	p1@ENSMUST00000134624,p1@uc007pyj.1	ENSMUST00000134624.1	intergenic	mmu-mir-6368
chr13	-	29947514	chr13	-	29855645	p1@Cdkal1	ENSMUST00000140278.4	intronic	mmu-novelmir-1067
chr13	+	36209741	chr13	+	36117872	p1@Fars2	NM_024274	intronic	mmu-novelmir-1071
chr13	+	40955310	chr13	+	40859941	p2@Gcnt2	ENSMUST00000110191.5	intronic	mmu-mir-5124a
chr13	-	43576644	chr13	-	43481275	p1@Ranbp9	NM_019930	intronic	mmu-novelmir-1072
chr13	-	47025161	chr13	-	46929792	p1@Kif13a	NM_010617	intronic	mmu-novelmir-1073
chr13	-	48641869	chr13	-	48546500	p@chr13:48641862..48641893,-	curation	intergenic	mmu-let-7a-1,mmu-let-7f-1,mmu-let-7d
chr13	-	48720918	chr13	-	48625549	p1@Ptpdc1	NM_207232	intronic	mmu-novelmir-1075
chr13	-	48966497	chr13	-	48871128	p1@Phf2	ENSMUST00000035540.7	intronic	mmu-novelmir-1076
chr13	-	49063429	chr13	-	48968060	p1@Fam120a	ENSMUST00000060805.6	intronic	mmu-novelmir-1077
chr13	-	54666686	chr13	-	54565325	p1@4833439L19Rik	ENSMUST00000126295.1	intronic	mmu-novelmir-1078
chr13	+	54676408	chr13	+	54575047	p1@Arl10	ENSMUST00000156024.1	intronic	mmu-novelmir-1079
chr13	+	55546697	chr13	+	55445336	p1@Grk6	ENSMUST00000001115.11	intronic	mmu-mir-6943
chr13	-	55589422	chr13	-	55488061	p1@Dbn1	ENSMUST00000109921.5	intronic	mmu-mir-6944
chr13	-	55614798	chr13	-	55513437	p1@Pdlim7	ENSMUST00000128910.4	intronic	mmu-mir-6945
chr13	-	55637886	chr13	-	55536525	p1@Ddx41	NM_134059	intronic	mmu-novelmir-1083,mmu-novelmir-1082
chr13	+	55736376	chr13	+	55635015	p1@Ddx46	ENSMUST00000172272.4	intronic	mmu-novelmir-1084
chr13	+	55794490	chr13	+	55693129	p1@B230219D22Rik	NM_181278	intronic	mmu-novelmir-1085
chr13	-	58215008	chr13	-	58113647	p1@Klhl3	ENSMUST00000160860.4	intronic	mmu-mir-874
chr13	-	58423857	chr13	-	58322496	p@chr13:58423856..58423859,-	NM_175214	intronic	mmu-mir-6369
chr13	-	58503846	chr13	-	58402485	p1@Hnrnpk	ENSMUST00000043269.10	intronic	mmu-mir-7a-1
chr13	-	60278726	chr13	-	60177365	p1@Gas1	NM_008086	intronic	mmu-novelmir-1086
chr13	+	62231262	chr13	+	62129902	p1@Zfp808	NM_001039239	intronic	mmu-novelmir-1087
chr13	+	63341383	chr13	+	63240074	p1@2010111I01Rik	ENSMUST00000021911.11	intronic	mmu-mir-23b,mmu-mir-27b,mmu-mir-24-1
chr13	+	64263201	chr13	+	64161893	p1@Habp4	NM_019986	intronic	mmu-novelmir-1089
chr13	+	65380160	chr13	+	65278852	p1@Zfp369	ENSMUST00000125510.2	intronic	mmu-novelmir-1090
chr13	+	72766268	chr13	+	72628820	p1@Irx2	ENSMUST00000074372.5	intronic	mmu-novelmir-1095
chr13	+	74543844	chr13	+	74406396	p4@Ftl1	ENSMUST00000090860.6	intronic	mmu-mir-692-3
chr13	+	75782313	chr13	+	75644865	p1@ENSMUST00000099371	ENSMUST00000099371.3	intergenic	mmu-mir-682
chr13	-	76081296	chr13	-	75943848	p1@Rhobtb3	ENSMUST00000022078.8	intronic	mmu-novelmir-1097
chr13	+	83872059	chr13	+	83732454	p1@C130071C03Rik	ENSMUST00000131907.5	intergenic	mmu-mir-9-2
chr13	+	91600786	chr13	+	91461181	p1@Ssbp2	NM_024272	intronic	mmu-novelmir-1099
chr13	-	93124930	chr13	-	92354975	p1@Msh3	ENSMUST00000187874.3	intronic	mmu-novelmir-1100
chr13	+	93614723	chr13	+	92844768	p1@Mtx3	ENSMUST00000076169.3	intronic	mmu-novelmir-1101
chr13	+	94541679	chr13	+	93771724	p2@Arsb	NM_009712	intronic	mmu-mir-5624
chr13	+	97841538	chr13	+	97071583	p1@Fam169a	ENSMUST00000042517.6	intronic	mmu-novelmir-1102
chr13	-	100286500	chr13	-	99516545	p1@Mtap1b	NM_008634	intronic	mmu-novelmir-1103
chr13	+	109460773	chr13	+	108670579	p1@Gm9000	NM_011056	intronic	mmu-mir-582,mmu-mir-1904
chr13	+	113825437	chr13	+	113035229	p1@Cdc20b	ENSMUST00000180543.4	intronic	mmu-mir-449c,mmu-mir-449a,mmu-mir-449b
chr14	-	14953451	chr14	-	14120937	p1@Psmd6	NM_025550	intronic	mmu-novelmir-1109
chr14	+	15178930	chr14	+	14346416	p1@Il3ra	NM_008369	intronic	mmu-novelmir-1110
chr14	-	19726319	chr14	-	18893805	p1@Ube2e2	ENSMUST00000150727.4	intronic	mmu-novelmir-1112
chr14	+	21493558	chr14	+	20674336	p1@Sec24c	NM_172596	intronic	mmu-mir-6946,mmu-novelmir-1113
chr14	+	21748647	chr14	+	20929425	p1@Vcl	NM_009502	intronic	mmu-novelmir-1114
chr14	+	26278736	chr14	+	25459250	p1@Zmiz1	ENSMUST00000007961.11	intronic	mmu-mir-3075,mmu-novelmir-1116
chr14	+	27457690	chr14	+	26638204	p1@Arf4	NM_007479	intronic	mmu-novelmir-1117
chr14	-	27489144	chr14	-	26669658	p1@Pde12	NM_178668	intronic	mmu-mir-7672
chr14	+	30791592	chr14	+	29978406	p1@Actr8	NM_027493	intronic	mmu-mir-6947
chr14	+	31362365	chr14	+	30549179	p1@Tkt	NM_009388	intronic	mmu-mir-3076,mmu-novelmir-1118
chr14	-	35123554	chr14	-	34310368	p3@Fam35a	NM_029389	intronic	mmu-novelmir-1120
chr14	+	35633011	chr14	+	34819825	p1@Grid1	ENSMUST00000043349.5	intronic	mmu-mir-346
chr14	-	46277745	chr14	-	45658070	p1@ENSMUST00000175426	ENSMUST00000149286.4	intronic	mmu-mir-5131
chr14	-	46333018	chr14	-	45713343	p1@ENSMUST00000117292	ENSMUST00000117292.1	intergenic	mmu-novelmir-1124
chr14	-	47896487	chr14	-	47276812	p1@Wdhd1	NM_172598	intronic	mmu-novelmir-1125
chr14	+	47896595	chr14	+	47276920	p1@Socs4	ENSMUST00000065562.4	intronic	mmu-novelmir-1126
chr14	-	51550526	chr14	-	50930851	p1@Tmem55b	NM_001033271	intronic	mmu-novelmir-1127
chr14	-	52723680	chr14	-	52104005	p1@Hnrnpc	NM_016884	intronic	mmu-novelmir-1128
chr14	+	52817191	chr14	+	52197516	p1@ENSMUST00000143086,p1@uc007tos.1	ENSMUST00000180857.1	intergenic	mmu-novelmir-1129
chr14	-	52877435	chr14	-	52257760	p@chr14:52877372..52877459,-	ENSMUST00000200169.1	intronic	mmu-novelmir-1130
chr14	-	55224756	chr14	-	54605919	p1@4931414P19Rik	NM_028890	intronic	mmu-novelmir-1131
chr14	-	55236841	chr14	-	54618004	p1@Psmb5	NM_011186	intronic	mmu-mir-686
chr14	-	55260174	chr14	-	54641337	p1@Cdh24	NM_199470	intronic	mmu-novelmir-1132
chr14	-	55305455	chr14	-	54686618	p1@Acin1	ENSMUST00000147714.4	intronic	mmu-mir-6948
chr14	-	55585416	chr14	-	54966579	p1@Myh6	NM_010856	intronic	mmu-mir-208a
chr14	-	55613385	chr14	-	54994548	p1@Myh7	NM_080728	intronic	mmu-mir-208b
chr14	+	56210587	chr14	+	55591750	p1@Rnf31	ENSMUST00000137296.4	intronic	mmu-novelmir-1135
chr14	+	56473026	chr14	+	55854189	p1@Nynrin	ENSMUST00000168479.1	intronic	mmu-novelmir-1136
chr14	-	56704053	chr14	-	56085216	p1@Mcpt8	ENSMUST00000015594.7	intronic	mmu-mir-6949
chr14	+	58417051	chr14	+	57798214	p1@Gm10094,p1@Sap18	ENSMUST00000111269.1	intronic	mmu-mir-3077
chr14	-	60216781	chr14	-	59597944	p1@Cdadc1	NM_027986	intronic	mmu-novelmir-1138
chr14	-	60870225	chr14	-	60251388	p1@Nupl1	NM_170591	intronic	mmu-novelmir-1139,mmu-mir-719
chr14	-	62058679	chr14	-	61439842	p1@Kpna3	NM_008466	intronic	mmu-novelmir-1140
chr14	-	62301165	chr14	-	61682328	p1@ENSMUST00000152279	ENSMUST00000180377.5	intergenic	mmu-mir-15a,mmu-mir-16-1
chr14	+	63456543	chr14	+	62837706	p1@Wdfy2	ENSMUST00000014691.8	intronic	mmu-mir-8098,mmu-mir-6541
chr14	-	63796697	chr14	-	63177860	p1@Fdft1	NM_010191	intronic	mmu-novelmir-1142,mmu-novelmir-1141
chr14	+	64224902	chr14	+	63606065	p1@Xkr6	ENSMUST00000119973.2	intronic	mmu-mir-598
chr14	-	65059752	chr14	-	64440915	p1@Msra	NM_026322	intronic	mmu-novelmir-1144
chr14	+	65206872	chr14	+	64588035	p1@A930011O12Rik,p1@Mir3078	ENSMUST00000180610.4	intergenic	mmu-mir-124-1,mmu-mir-3078
chr14	-	65716890	chr14	-	65098053	p1@Extl3	ENSMUST00000022550.7	intronic	mmu-novelmir-1145
chr14	+	65977334	chr14	+	65358497	p2@Zfp395	ENSMUST00000066994.6	intronic	mmu-novelmir-1146
chr14	-	67691272	chr14	-	67072435	p1@Ppp2r2a	NM_028032	intronic	mmu-novelmir-1148
chr14	+	67853447	chr14	+	67234610	p1@Ebf2	ENSMUST00000176029.1	intronic	mmu-novelmir-1149
chr14	-	68551580	chr14	-	67933523	p1@Dock5	NM_177780	intronic	mmu-mir-6539
chr14	+	70008974	chr14	+	69609167	p1@Loxl2	ENSMUST00000022660.10	intronic	mmu-mir-6950,mmu-novelmir-1150
chr14	+	70843332	chr14	+	70443525	p1@Mir320	curation	intergenic	mmu-mir-320
chr14	-	73725619	chr14	-	73325812	p1@Rb1	ENSMUST00000022701.6	intronic	mmu-mir-687
chr14	-	75347684	chr14	-	74947877	p1@Lrch1	NM_001033439	intronic	mmu-novelmir-1151
chr14	-	78936646	chr14	-	78536839	p1@Akap11	ENSMUST00000022593.5	intronic	mmu-novelmir-1153
chr14	-	79113464	chr14	-	78713657	p@chr14:79113463..79113464,-	NM_001081336	intronic	mmu-novelmir-1155
chr14	+	79915475	chr14	+	79515668	p1@Elf1	ENSMUST00000110835.1	intronic	mmu-novelmir-1156
chr14	-	103381854	chr14	-	102982637	p1@Kctd12,p1@Mir5130	NM_177715	intronic	mmu-mir-5130
chr14	+	115441977	chr14	+	115042755	p1@ENSMUST00000134140	ENSMUST00000134140.2	intergenic	mmu-mir-17,mmu-mir-18a,mmu-mir-19a,mmu-mir-20a,mmu-mir-19b-1,mmu-mir-92a-1
chr14	+	118636385	chr14	+	118237163	p@chr14:118636380..118636389,+	ENSMUST00000163396.1	intergenic	mmu-mir-6241
chr14	-	119105424	chr14	-	118706202	p1@Abcc4	NM_001033336	intronic	mmu-novelmir-1160,mmu-mir-6391
chr14	+	121434784	chr14	+	121035562	p1@Farp1	ENSMUST00000026635.7	intronic	mmu-novelmir-1162,mmu-novelmir-1163
chr15	+	3220996	chr15	+	3270996	p1@Sepp1	ENSMUST00000160311.1	intronic	mmu-novelmir-1164
chr15	+	8059332	chr15	+	8109332	p1@Nup155	ENSMUST00000163765.1	intronic	mmu-novelmir-1167
chr15	-	10400318	chr15	-	10470563	p1@Dnajc21	XM_001473643	intronic	mmu-novelmir-1168
chr15	+	12047584	chr15	+	12117829	p2@Zfr	ENSMUST00000122941.4	intronic	mmu-mir-1898
chr15	+	25552329	chr15	+	25622574	p2@Myo10	NM_019472	intronic	mmu-novelmir-1170
chr15	+	25772912	chr15	+	25843157	p2@Fam134b	NM_001034851	intronic	mmu-mir-7212
chr15	+	27396441	chr15	+	27466686	p1@Ank	NM_020332	intronic	mmu-mir-7117
chr15	-	31460767	chr15	-	31531012	p1@March6	NM_172606	intronic	mmu-novelmir-1171
chr15	-	36212889	chr15	-	36283134	p1@Rnf19a	NM_013923	intronic	mmu-mir-8097
chr15	-	36538727	chr15	-	36608972	p1@Pabpc1	ENSMUST00000001809.11	intronic	mmu-novelmir-1172
chr15	-	38449018	chr15	-	38519263	p1@Azin1	ENSMUST00000110329.4	intronic	mmu-mir-6951
chr15	+	40486581	chr15	+	40655035	p1@Zfpm2	NM_011766	intronic	mmu-novelmir-1174
chr15	-	50721596	chr15	-	50890050	p1@Trps1	NM_032000	intronic	mmu-mir-1907
chr15	-	53177687	chr15	-	53346132	p1@Ext1	ENSMUST00000077273.5	intronic	mmu-novelmir-1176
chr15	-	53733991	chr15	-	53902436	p1@Samd12	NM_177225	intronic	mmu-mir-28c
chr15	-	54751573	chr15	-	54920018	p1@Enpp2	ENSMUST00000173516.4	intronic	mmu-novelmir-1177
chr15	+	58765356	chr15	+	58933801	p1@Ndufb9	NM_023172	intronic	mmu-novelmir-1179
chr15	-	63891919	chr15	-	64060357	p2@Fam49b	NM_144846	intronic	mmu-novelmir-1181
chr15	-	66118184	chr15	-	66286622	p1@Kcnq3	NM_152923	intronic	mmu-novelmir-1183
chr15	-	68194716	chr15	-	68363154	p@chr15:68194701..68194722,-	ENSMUST00000175699.1	intergenic	mmu-mir-30d
chr15	-	73253567	chr15	-	73423137	p1@Ptk2	ENSMUST00000110036.5	intronic	mmu-novelmir-1184,mmu-mir-151
chr15	+	74551654	chr15	+	74721224	p1@4930572J05Rik	NM_198607	intronic	mmu-novelmir-1185
chr15	+	74786078	chr15	+	74955648	p1@Ly6e	ENSMUST00000191436.3	intronic	mmu-novelmir-1186
chr15	-	75739736	chr15	-	75909306	p1@Eef1d	ENSMUST00000151066.4	intronic	mmu-novelmir-1189,mmu-novelmir-1188
chr15	-	75900163	chr15	-	76069733	p1@Scrib	NM_134089	intronic	mmu-mir-6952
chr15	-	76026128	chr15	-	76195698	p1@Plec	NM_201394	intronic	mmu-novelmir-1191
chr15	-	76059930	chr15	-	76229500	p2@Plec	NM_201385	intronic	mmu-mir-1942
chr15	+	76077230	chr15	+	76246800	p1@Grina	NM_023168	intronic	mmu-mir-6953
chr15	+	76210962	chr15	+	76380532	p1@Heatr7a	ENSMUST00000160986.4	intronic	mmu-mir-6954
chr15	+	76709739	chr15	+	76879309	p1@Zfp7	NM_145916	intronic	mmu-novelmir-1194
chr15	-	77137328	chr15	-	77306898	p1@Rbfox2	NM_053104	intronic	mmu-novelmir-1195
chr15	-	77672545	chr15	-	77842115	p1@Myh9	NM_022410	intronic	mmu-novelmir-1196
chr15	-	77787133	chr15	-	77956703	p1@Foxred2	ENSMUST00000016696.9	intronic	mmu-novelmir-1199
chr15	-	78136086	chr15	-	78305656	p1@Csf2rb2	NM_007781	intronic	mmu-mir-7676-1
chr15	+	78156484	chr15	+	78326054	p2@Csf2rb	NM_007780	intronic	mmu-mir-7676-2
chr15	-	78603908	chr15	-	78773478	p1@Mfng	ENSMUST00000018313.5	intronic	mmu-novelmir-1200
chr15	+	78707998	chr15	+	78877568	p1@Gga1	NM_145929	intronic	mmu-mir-6955
chr15	+	78813517	chr15	+	78983087	p1@Triobp	NM_001024716	intronic	mmu-mir-6956
chr15	+	78996474	chr15	+	79166044	p1@ENSMUST00000130745,p1@ENSMUST00000131710	XM_001476760	intergenic	mmu-novelmir-1201
chr15	-	79233710	chr15	-	79403280	p1@Tmem184b	NM_172608	intronic	mmu-mir-1943
chr15	-	79845406	chr15	-	80014976	p1@Pdgfb	NM_011057	intronic	mmu-mir-7213
chr15	-	79913782	chr15	-	80083352	p1@Gm12816,p1@LOC674810,p1@Rpl3	ENSMUST00000187578.1	intronic	mmu-novelmir-1203
chr15	+	80453944	chr15	+	80623514	p3@Grap2	ENSMUST00000043149.7	intronic	mmu-mir-6957
chr15	+	80541749	chr15	+	80711319	p1@Tnrc6b	ENSMUST00000067689.7	intronic	mmu-mir-5113
chr15	+	81575528	chr15	+	81745098	p1@Zc3h7b	NM_001081016	intronic	mmu-novelmir-1206
chr15	+	81977691	chr15	+	82147261	p1@Srebf2	ENSMUST00000023100.6	intronic	mmu-mir-33
chr15	-	82730241	chr15	-	82899811	p@chr15:82730209..82730253,-	NM_013836	intronic	mmu-novelmir-1208
chr15	-	82979727	chr15	-	83149297	p1@Poldip3	ENSMUST00000129372.1	intronic	mmu-novelmir-1209
chr15	+	83998246	chr15	+	84167816	p1@Pnpla3	NM_054088	intronic	mmu-mir-6392
chr15	-	84818401	chr15	-	84987971	p1@5031439G07Rik	NM_001033273	intronic	mmu-mir-1249
chr15	+	85501704	chr15	+	85671274	p@chr15:85501690..85501709,+	ENSMUST00000230913.1	intergenic	mmu-let-7c-2,mmu-let-7b
chr15	+	88919512	chr15	+	89089082	p1@1300018J18Rik	ENSMUST00000082439.4	intronic	mmu-novelmir-1211
chr15	-	88959091	chr15	-	89128661	p1@Hdac10	ENSMUST00000128908.4	intronic	mmu-novelmir-1212
chr15	-	88971115	chr15	-	89140685	p1@Mapk12	ENSMUST00000088827.6	intronic	mmu-novelmir-1213
chr15	-	89011187	chr15	-	89180757	p1@Plxnb2	XM_001003435	intronic	mmu-novelmir-1214,mmu-mir-7118
chr15	-	89026904	chr15	-	89196473	p1@Fam116b	NM_027081	intronic	mmu-mir-6958
chr15	-	89145707	chr15	-	89315276	p1@Sbf1	ENSMUST00000124576.4	intronic	mmu-mir-6959
chr15	+	90054747	chr15	+	90224316	p1@Alg10b	NM_001033441	intronic	mmu-mir-7648
chr15	-	97536253	chr15	-	97705822	p1@Rpap3	NM_028003	intronic	mmu-novelmir-1217
chr15	-	97835075	chr15	-	98004644	p1@Col2a1	NM_031163	intronic	mmu-novelmir-1218
chr15	-	98364700	chr15	-	98534269	p1@2310037I24Rik	ENSMUST00000023727.13	intronic	mmu-mir-1291
chr15	+	98905409	chr15	+	99074978	p1@Troap	ENSMUST00000039665.6	intronic	mmu-mir-6960
chr15	+	99500808	chr15	+	99670377	p1@Accn2	NM_009597	intronic	mmu-novelmir-1219
chr15	-	100499934	chr15	-	100669503	p1@ENSMUST00000100198	XM_001000082	intronic	mmu-mir-6961
chr15	+	100701087	chr15	+	100870656	p2@Scn8a	NM_001077499	intronic	mmu-novelmir-1220
chr15	+	101004553	chr15	+	101174122	p1@Acvr1b	NM_007395	intronic	mmu-mir-6962
chr15	+	101974668	chr15	+	102144237	p3@Igfbp6	NM_008344	intronic	mmu-novelmir-1223
chr15	-	102502803	chr15	-	102672372	p@chr15:102502800..102502805,-	ENSMUST00000186952.1	intronic	mmu-mir-688
chr15	+	102801870	chr15	+	102971439	p@chr15:102801867..102801905,+	ENSMUST00000174869.1	intronic	mmu-mir-196a-2
chr15	+	102828666	chr15	+	102998235	p1@Hoxc6	ENSMUST00000174869.1	intronic	mmu-mir-615
chr15	+	103103332	chr15	+	103272901	p1@Copz1	ENSMUST00000100162.3	intronic	mmu-mir-148b
chr15	-	103196979	chr15	-	103366548	p1@Itga5	NM_010577	intronic	mmu-mir-6963
chr16	-	4211461	chr16	-	4211461	p@chr16:4211456..4211464,-	NM_001025432	intronic	mmu-novelmir-1226
chr16	-	5222384	chr16	-	5222291	p1@AU021092	ENSMUST00000050160.4	intronic	mmu-mir-6364
chr16	+	6349163	chr16	+	6349070	p1@Rbfox1	NM_021477	intronic	mmu-novelmir-1228
chr16	-	8739038	chr16	-	8738945	p1@Usp7	ENSMUST00000160405.4	intronic	mmu-novelmir-1231,mmu-novelmir-1230,mmu-novelmir-1229
chr16	-	8792401	chr16	-	8792308	p3@Usp7	ENSMUST00000160405.4	intronic	mmu-novelmir-1232
chr16	-	10785626	chr16	-	10785533	p1@Socs1	NM_009896	intronic	mmu-novelmir-1233
chr16	+	11322984	chr16	+	11322891	p1@Snx29	ENSMUST00000180792.4	intronic	mmu-novelmir-1234
chr16	+	13448054	chr16	+	13447961	p@chr16:13448034..13448060,+	curation	intergenic	mmu-mir-193b,mmu-mir-365-1
chr16	-	13668248	chr16	-	13668155	p1@Parn	NM_028761	intronic	mmu-novelmir-1235
chr16	-	17125230	chr16	-	17125137	p1@2610318N02Rik	NM_183287	intronic	mmu-mir-301b,mmu-mir-130b
chr16	+	17147042	chr16	+	17146949	p1@Ydjc	ENSMUST00000145198.1	intronic	mmu-novelmir-1237
chr16	+	17233668	chr16	+	17233575	p1@Hic2	ENSMUST00000090190.8	intronic	mmu-novelmir-1238,mmu-novelmir-1239
chr16	-	18289319	chr16	-	18289226	p1@Dgcr8	ENSMUST00000009321.7	intronic	mmu-mir-3618,mmu-mir-1306
chr16	-	18344003	chr16	-	18343910	p1@D16H22S680E	ENSMUST00000130752.1	intronic	mmu-mir-185
chr16	+	20590226	chr16	+	20590153	p1@Vwa5b2	ENSMUST00000096197.7	intronic	mmu-mir-1224
chr16	-	20716187	chr16	-	20716114	p1@Clcn2	NM_009900	intronic	mmu-novelmir-1243
chr16	-	21296986	chr16	-	21296913	p1@ENSMUST00000152179,p1@uc007yri.1	ENSMUST00000181476.1	intergenic	mmu-mir-7680
chr16	+	21896542	chr16	+	21896469	p1@ENSMUST00000171547	NM_172821	intronic	mmu-novelmir-1244
chr16	-	22657272	chr16	-	22657199	p1@Dgkg	ENSMUST00000023578.10	intronic	mmu-mir-8095
chr16	+	24393814	chr16	+	24393728	p1@Lpp	NM_178665	intronic	mmu-mir-28a
chr16	-	28753289	chr16	-	28753203	p1@Fgf12	NM_010199	intronic	mmu-mir-690
chr16	-	30587649	chr16	-	30587563	p1@Lsg1	NM_178069	intronic	mmu-novelmir-1245
chr16	+	33062605	chr16	+	33062519	p1@Lmln	NM_172823	intronic	mmu-mir-1947
chr16	-	42340666	chr16	-	42340553	p1@Gap43	NM_008083	intronic	mmu-mir-6540
chr16	+	42907701	chr16	+	42907588	p1@Zbtb20	ENSMUST00000114694.5	intronic	mmu-mir-568
chr16	-	44558954	chr16	-	44558841	p1@Boc	NM_172506	intronic	mmu-novelmir-1247,mmu-mir-3081
chr16	+	52031711	chr16	+	52031598	p1@Cblb	NM_001033238	intronic	mmu-novelmir-1248
chr16	+	57121848	chr16	+	57121735	p1@Tomm70a	NM_138599	intronic	mmu-novelmir-1250
chr16	-	74412030	chr16	-	74411785	p2@Robo2	ENSMUST00000116586.2	intronic	mmu-mir-691
chr16	-	76373294	chr16	-	76373049	p1@Nrip1	NM_173440	intronic	mmu-novelmir-1253,mmu-novelmir-1252
chr16	+	77329573	chr16	+	77329328	p1@2810055G20Rik	ENSMUST00000183099.4	intergenic	mmu-mir-99a,mmu-let-7c-1,mmu-mir-125b-2
chr16	+	84703578	chr16	+	84703333	p@chr16:84703569..84703586,+	ENSMUST00000185662.3	intergenic	mmu-mir-155
chr16	+	91648129	chr16	+	91647884	p1@Son	ENSMUST00000122302.4	intronic	mmu-novelmir-1255
chr16	-	92697570	chr16	-	92697325	p2@Runx1	NM_009821	intronic	mmu-novelmir-1256
chr16	+	93368506	chr16	+	93368261	p@chr16:93368498..93368512,+	curation	intergenic	mmu-mir-802
chr16	+	93712223	chr16	+	93711978	p1@Dopey2	NM_027293	intronic	mmu-novelmir-1257
chr16	+	94791291	chr16	+	94569684	p1@Dyrk1a	ENSMUST00000119878.4	intronic	mmu-novelmir-1259
chr16	-	98144216	chr16	-	97922606	p1@C2cd2	NM_174847	intronic	mmu-mir-6964
chr17	+	5841365	chr17	+	5841365	p1@Snx9	NM_025664	intronic	mmu-novelmir-1260
chr17	-	7152667	chr17	-	6948318	p1@Rsph3b	XM_001475820	intronic	mmu-mir-692-1
chr17	+	7374506	chr17	+	7170157	p1@Rps6ka2	NM_011299	intronic	mmu-novelmir-1262
chr17	-	10512209	chr17	-	10319344	p1@Qk	ENSMUST00000097414.6	intronic	mmu-novelmir-1264
chr17	+	11033240	chr17	+	10840374	p1@Park2	NM_016694	intronic	mmu-novelmir-1266
chr17	+	17539713	chr17	+	17402749	p1@Lix1	NM_025681	intronic	mmu-novelmir-1269
chr17	+	17964119	chr17	+	17827155	p@chr17:17964098..17964127,+	ENSMUST00000228490.1	intergenic	mmu-mir-99b,mmu-let-7e,mmu-mir-125a
chr17	+	23940192	chr17	+	23803225	p1@Srrm2	ENSMUST00000088621.7	intronic	mmu-mir-5125
chr17	-	24342469	chr17	-	24205524	p1@Tbc1d24	NM_173186	intronic	mmu-novelmir-1271
chr17	-	24388292	chr17	-	24251347	p1@Ccnf	NM_007634	intronic	mmu-mir-6965,mmu-mir-5134
chr17	+	24806657	chr17	+	24669712	p1@Zfp598	NM_183149	intronic	mmu-novelmir-1272
chr17	-	25252710	chr17	-	25115765	p1@Telo2	NM_027880	intronic	mmu-novelmir-1273
chr17	-	25377071	chr17	-	25240126	p1@Gnptg,p1@LOC100047632,p1@LOC100505011	ENSMUST00000115154.7	intronic	mmu-novelmir-1274
chr17	-	25393226	chr17	-	25256281	p1@Baiap3	ENSMUST00000182435.4	intronic	mmu-mir-3547
chr17	+	25910745	chr17	+	25773800	p1@Narfl	NM_026238	intronic	mmu-mir-6966
chr17	-	25933919	chr17	-	25796974	p1@Metrn	NM_133719	intronic	mmu-novelmir-1276
chr17	-	25969864	chr17	-	25832919	p1@Stub1	NM_019719	intronic	mmu-mir-3082
chr17	-	26078880	chr17	-	25941935	p1@Pigq	ENSMUST00000097368.6	intronic	mmu-novelmir-1277
chr17	-	26206463	chr17	-	26069518	p1@Rab11fip3	XM_001479926	intronic	mmu-novelmir-1278
chr17	+	27054064	chr17	+	26917119	p1@Kifc5b	NM_053173	intronic	mmu-mir-6967-1
chr17	+	27070310	chr17	+	26933365	p2@Phf1	NM_009343	intronic	mmu-mir-6968
chr17	+	27194245	chr17	+	27057300	p1@Itpr3	ENSMUST00000049308.8	intronic	mmu-mir-7677
chr17	-	27461973	chr17	-	27325028	p1@uc008bke.1	XM_001478663	intronic	mmu-mir-7214
chr17	-	27957496	chr17	-	27820551	p1@D17Wsu92e	NM_001033279	intronic	mmu-novelmir-1280
chr17	+	28046288	chr17	+	27909343	p1@Anks1	NM_181413	intronic	mmu-novelmir-1281
chr17	+	28344775	chr17	+	28207830	p1@Def6	NM_027185	intronic	mmu-novelmir-1282
chr17	-	28697656	chr17	-	28560711	p1@Clps	ENSMUST00000114785.1	intronic	mmu-mir-6969
chr17	-	29375076	chr17	-	29238131	p1@Cpne5	ENSMUST00000024805.10	intronic	mmu-novelmir-1285
chr17	+	29405892	chr17	+	29268947	p1@BC004004	NM_030561	intronic	mmu-novelmir-1287
chr17	+	29497875	chr17	+	29360930	p1@Fgd2	ENSMUST00000146800.1	intronic	mmu-novelmir-1288
chr17	+	29686736	chr17	+	29549791	p1@Ftsjd2,p1@Tbc1d22b	ENSMUST00000048677.7	intronic	mmu-mir-7667
chr17	-	31795686	chr17	-	31658741	p1@U2af1	ENSMUST00000166526.4	intronic	mmu-novelmir-1290
chr17	+	32173353	chr17	+	32036408	p1@Rrp1b	ENSMUST00000156164.1	intronic	mmu-novelmir-1291
chr17	-	32421667	chr17	-	32284722	p1@Brd4	ENSMUST00000127893.4	intronic	mmu-novelmir-1293,mmu-novelmir-1292
chr17	-	33855608	chr17	-	33718663	p1@March2	ENSMUST00000173329.4	intronic	mmu-novelmir-1294
chr17	-	34027578	chr17	-	33890633	p1@Kifc1,p1@LOC100044006,p1@LOC100044746	ENSMUST00000114361.5	intronic	mmu-mir-6967-2
chr17	+	34066920	chr17	+	33929975	p1@Rgl2	ENSMUST00000173153.4	intronic	mmu-novelmir-1295
chr17	+	34077624	chr17	+	33940679	p1@Wdr46	ENSMUST00000025170.9	intronic	mmu-novelmir-1296
chr17	+	34161633	chr17	+	34024688	p@chr17:34161620..34161663,+	curation	intergenic	mmu-mir-219c
chr17	-	34987143	chr17	-	34850198	p1@Skiv2l	ENSMUST00000174363.4	intronic	mmu-novelmir-1299,mmu-novelmir-1298,mmu-mir-6971,mmu-mir-6970
chr17	-	34999161	chr17	-	34862216	p1@Cfb	NM_008198	intronic	mmu-mir-6972
chr17	+	35035424	chr17	+	34898479	p1@Ehmt2	ENSMUST00000114033.5	intronic	mmu-novelmir-1300
chr17	+	35138284	chr17	+	35001339	p1@Vars	NM_011690	intronic	mmu-novelmir-1301
chr17	-	35183498	chr17	-	35046553	p2@Msh5	ENSMUST00000174603.4	intronic	mmu-novelmir-1302
chr17	+	35196016	chr17	+	35059071	p1@Ddah2	NM_016765	intronic	mmu-novelmir-1303
chr17	+	35331459	chr17	+	35194514	p1@Ltb	NM_008518	intronic	mmu-mir-6973a
chr17	-	35342117	chr17	-	35205172	p1@Lta	NM_010735	intronic	mmu-mir-6974
chr17	+	35378746	chr17	+	35241801	p1@Ddx39b	ENSMUST00000174164.1	intronic	mmu-mir-6975,mmu-mir-8094
chr17	-	35804537	chr17	-	35667592	p1@Vars2	NM_175137	intronic	mmu-novelmir-1304
chr17	-	35810659	chr17	-	35673714	p1@Gtf2h4	ENSMUST00000160752.5	intronic	mmu-novelmir-1305
chr17	+	35978592	chr17	+	35841647	p1@Mdc1	ENSMUST00000174124.1	intronic	mmu-novelmir-1306
chr17	+	36053931	chr17	+	35916986	p1@Ppp1r10	NM_175934	intronic	mmu-mir-1894
chr17	-	36106697	chr17	-	35969752	p1@Abcf1	NM_013854	intronic	mmu-mir-877
chr17	+	36294837	chr17	+	36157892	p1@ENSMUST00000174752	ENSMUST00000090537.6	intergenic	mmu-novelmir-1308
chr17	-	45611794	chr17	-	45474845	p1@Spats1	NM_027649	intronic	mmu-novelmir-1309
chr17	+	46339768	chr17	+	46202819	p1@Xpo5	NM_028198	intronic	mmu-mir-693
chr17	-	46693118	chr17	-	46556169	p1@Srf	NM_020493	intronic	mmu-mir-6976
chr17	-	46766404	chr17	-	46629455	p1@Ptk7	NM_175168	intronic	mmu-novelmir-1313
chr17	+	46783191	chr17	+	46646242	p1@Mrpl2	ENSMUST00000181301.1	intergenic	mmu-novelmir-1314
chr17	+	47027624	chr17	+	46890675	p1@Tbcc	NM_178385	intronic	mmu-novelmir-1315
chr17	+	47642168	chr17	+	47505219	p5@Ccnd3	ENSMUST00000182060.1	intronic	mmu-novelmir-1316
chr17	+	47874006	chr17	+	47737057	p1@Tfeb	ENSMUST00000086932.6	intronic	mmu-novelmir-1317
chr17	-	48061392	chr17	-	47924443	p1@Foxp4	NM_028767	intronic	mmu-novelmir-1318
chr17	+	49567717	chr17	+	49428392	p1@Mocs1	ENSMUST00000173033.4	intronic	mmu-novelmir-1319
chr17	-	51971971	chr17	-	51832646	p1@Satb1	NM_009122	intronic	mmu-novelmir-1322,mmu-novelmir-1321
chr17	-	56358259	chr17	-	56218836	p1@Dpp9	NM_172624	intronic	mmu-novelmir-1323
chr17	+	56381202	chr17	+	56241779	p1@uc008dbj.1	curation	intergenic	mmu-mir-7b
chr17	+	56465487	chr17	+	56326064	p1@Kdm4b	ENSMUST00000025036.7	intronic	mmu-novelmir-1324
chr17	-	56615851	chr17	-	56476428	p1@Ptprs	ENSMUST00000067538.5	intronic	mmu-mir-6977
chr17	-	56723947	chr17	-	56584524	p1@Safb2	ENSMUST00000133604.4	intronic	mmu-novelmir-1325
chr17	-	57367514	chr17	-	57228091	p1@C3,p1@LOC100048759	NM_009778	intronic	mmu-mir-6978
chr17	-	67703848	chr17	-	67354508	p1@Ptprm	ENSMUST00000037974.8	intronic	mmu-mir-5709
chr17	+	74927862	chr17	+	74528522	p1@Birc6	ENSMUST00000183224.4	intronic	mmu-novelmir-1329
chr17	-	79234701	chr17	-	78835361	p1@Heatr5b	NM_001081179	intronic	mmu-novelmir-1331
chr17	+	84105572	chr17	+	83706232	p1@Mta3	NM_054082	intronic	mmu-novelmir-1334
chr17	-	86544497	chr17	-	86145157	p1@Srbd1	ENSMUST00000095187.3	intronic	mmu-novelmir-1336,mmu-novelmir-1335
chr17	+	87682262	chr17	+	87282922	p1@Ttc7	ENSMUST00000125875.4	intronic	mmu-novelmir-1337
chr18	-	6490855	chr18	-	6490857	p1@Epc1	NM_027497	intronic	mmu-mir-1893
chr18	+	10725623	chr18	+	10725625	p1@Mib1	NM_144860	intronic	mmu-mir-1b
chr18	-	10787691	chr18	-	10787693	p@chr18:10787682..10787697,-	curation	intergenic	mmu-mir-1a-2,mmu-mir-133a-1
chr18	+	12802289	chr18	+	12643780	p1@Ttc39c	NM_028341	intronic	mmu-mir-1948
chr18	+	31963752	chr18	+	31804098	p1@Wdr33	ENSMUST00000025264.6	intronic	mmu-novelmir-1341
chr18	-	34911181	chr18	-	34751527	p1@Cdc25c	NM_009860	intronic	mmu-novelmir-1342
chr18	+	34919210	chr18	+	34759556	p1@Fam53c	ENSMUST00000097622.3	intronic	mmu-novelmir-1343
chr18	+	34936675	chr18	+	34777021	p1@Kdm3b	NM_001081256	intronic	mmu-novelmir-1344
chr18	-	35113998	chr18	-	34954344	p1@Hspa9	ENSMUST00000025217.8	intronic	mmu-novelmir-1345
chr18	+	35713064	chr18	+	35553410	p1@Mir1949,p1@Snhg4,p1@Snora74a	ENSMUST00000187322.1	intergenic	mmu-mir-1949
chr18	+	35721886	chr18	+	35562232	p1@Matr3	ENSMUST00000186796.3	intronic	mmu-novelmir-1346
chr18	+	37849509	chr18	+	37689855	p1@Pcdhgb2	ENSMUST00000195112.1	intronic	mmu-novelmir-1347
chr18	-	38095066	chr18	-	37935412	p1@Diap1	NM_007858	intronic	mmu-mir-6979
chr18	-	38146826	chr18	-	37987172	p@chr18:38146824..38146828,-	NM_139206	intronic	mmu-mir-6981
chr18	-	38157209	chr18	-	37997555	p2@Arap3	ENSMUST00000042944.7	intronic	mmu-mir-6980
chr18	-	42110871	chr18	-	41951217	p1@Prelid2	NM_029942	intronic	mmu-novelmir-1349
chr18	+	44540182	chr18	+	44380528	p1@Dcp2	ENSMUST00000025350.8	intronic	mmu-novelmir-1350
chr18	+	48206300	chr18	+	48046646	p2@Gm5506	NM_001025388	intronic	mmu-novelmir-1351
chr18	+	57292637	chr18	+	57132983	p1@Megf10	ENSMUST00000075770.9	intronic	mmu-novelmir-1353
chr18	+	60963503	chr18	+	60803849	p1@Cd74	NM_001042605	intronic	mmu-mir-5107,mmu-novelmir-1354
chr18	+	61085286	chr18	+	60925632	p1@Camk2a	NM_177407	intronic	mmu-mir-7220,mmu-mir-6982
chr18	+	61265508	chr18	+	61105854	p1@Csf1r	ENSMUST00000115268.3	intronic	mmu-mir-6983
chr18	-	61560054	chr18	-	61400400	p1@Ppargc1b	ENSMUST00000063307.5	intronic	mmu-mir-378a
chr18	-	61825148	chr18	-	61665494	p1@ENSMUST00000154522,p1@uc008fcj.1	NR_045402	intergenic	mmu-mir-143,mmu-mir-145a
chr18	+	65047362	chr18	+	64887708	p2@Nedd4l	ENSMUST00000163516.4	intronic	mmu-novelmir-1355
chr18	+	65403953	chr18	+	65244299	p@chr18:65403941..65403959,+	curation	intergenic	mmu-mir-122
chr18	-	66451486	chr18	-	66291832	p1@Ccbe1	NM_178793	intronic	mmu-mir-694
chr18	-	68459864	chr18	-	68300210	p1@4933403F05Rik	ENSMUST00000042852.6	intronic	mmu-mir-7219
chr18	-	70301237	chr18	-	70141583	p2@Rab27b	NM_001082553	intronic	mmu-novelmir-1356
chr18	-	72510693	chr18	-	72351039	p1@Dcc	ENSMUST00000126030.1	intronic	mmu-novelmir-1357
chr18	+	75527018	chr18	+	75367364	p1@Smad7	NM_001042660	intronic	mmu-novelmir-1358
chr18	-	75857317	chr18	-	75697663	p1@Ctif	ENSMUST00000165559.1	intronic	mmu-novelmir-1360
chr18	+	78135205	chr18	+	77938466	p1@5430411K18Rik	XM_973419	intronic	mmu-novelmir-1361
chr18	+	89141407	chr18	+	88972015	p1@Rttn	NM_175542	intronic	mmu-mir-6359
chr19	+	3283042	chr19	+	3283042	p1@Mrpl21	NM_172252	intronic	mmu-mir-6984
chr19	-	3575739	chr19	-	3575739	p1@Ppp6r3	ENSMUST00000113997.5	intronic	mmu-novelmir-1364
chr19	+	3851832	chr19	+	3851832	p1@Chka	ENSMUST00000124219.1	intronic	mmu-novelmir-1365
chr19	-	4269172	chr19	-	4269172	p1@Ssh3	NM_198113	intronic	mmu-mir-6985
chr19	-	4306222	chr19	-	4306222	p1@Adrbk1	ENSMUST00000088737.7	intronic	mmu-novelmir-1366
chr19	+	4510526	chr19	+	4510526	p1@Pcx	ENSMUST00000068004.9	intronic	mmu-novelmir-1367
chr19	-	4625642	chr19	-	4625642	p1@Rce1	NM_023131	intronic	mmu-novelmir-1368,mmu-mir-6986
chr19	+	4962315	chr19	+	4962315	p1@Mrpl11	NM_025553	intronic	mmu-novelmir-1369
chr19	-	5295422	chr19	-	5295422	p1@Sf3b2	NM_030109	intronic	mmu-novelmir-1371
chr19	-	5388677	chr19	-	5388677	p1@Sart1	NM_016882	intronic	mmu-novelmir-1372
chr19	-	5688673	chr19	-	5688673	p1@Pcnxl3	ENSMUST00000113615.5	intronic	mmu-mir-6987
chr19	-	5726252	chr19	-	5726252	p1@Ehbp1l1	NM_053252	intronic	mmu-novelmir-1373
chr19	+	5741998	chr19	+	5741998	p@chr19:5741959..5742015,+	NM_008520	intronic	mmu-novelmir-1374
chr19	+	6047065	chr19	+	6047065	p1@Syvn1	ENSMUST00000142101.4	intronic	mmu-mir-6988,mmu-novelmir-1375
chr19	-	6077195	chr19	-	6077195	p1@1110014N23Rik	ENSMUST00000025711.8	intronic	mmu-novelmir-1376
chr19	-	6084905	chr19	-	6084905	p1@Zfpl1	ENSMUST00000160448.4	intronic	mmu-novelmir-1377
chr19	+	6241722	chr19	+	6241722	p1@Atg2a	NM_194348	intronic	mmu-novelmir-1378
chr19	+	6276921	chr19	+	6276921	p1@Ehd1	NM_010119	intronic	mmu-novelmir-1379
chr19	+	6306440	chr19	+	6306440	p1@Cdc42bpg	XM_140553	intronic	mmu-novelmir-1380
chr19	+	6341169	chr19	+	6341169	p1@Map4k2	ENSMUST00000025897.9	intronic	mmu-mir-6989,mmu-novelmir-1381
chr19	-	6915091	chr19	-	6840601	p1@Rps6ka4	NM_019924	intronic	mmu-mir-5046
chr19	-	6996265	chr19	-	6921775	p1@Esrra	ENSMUST00000173635.1	intronic	mmu-mir-6990
chr19	-	7093869	chr19	-	7019379	p1@Fermt3	NM_153795	intronic	mmu-novelmir-1383
chr19	+	7131284	chr19	+	7056794	p2@Macrod1	NM_134147	intronic	mmu-novelmir-1384
chr19	+	7492116	chr19	+	7417626	p1@2700081O15Rik	ENSMUST00000159348.2	intronic	mmu-mir-6991
chr19	+	8815930	chr19	+	8741440	p1@Stx5a	ENSMUST00000176381.4	intronic	mmu-mir-6992
chr19	+	8972598	chr19	+	8898108	p1@Ganab	NM_008060	intronic	mmu-novelmir-1386
chr19	+	10257429	chr19	+	10182939	p1@Fads1	NM_146094	intronic	mmu-mir-6993
chr19	-	10599603	chr19	-	10525113	p1@Sdhaf2	NM_025333	intronic	mmu-novelmir-1387
chr19	+	10680087	chr19	+	10605597	p1@Ddb1	NM_015735	intronic	mmu-novelmir-1388
chr19	+	11543887	chr19	+	11469397	p1@Ms4a6c	ENSMUST00000187462.1	intronic	mmu-novelmir-1390
chr19	+	11593010	chr19	+	11518520	p1@Ms4a6b	NM_027209	intronic	mmu-novelmir-1391
chr19	+	11986926	chr19	+	11912436	p1@Patl1	NM_172635	intronic	mmu-mir-6994
chr19	+	22515515	chr19	+	22441025	p@chr19:22515503..22515521,+	ENSMUST00000099569.5	intronic	mmu-mir-204
chr19	+	23215706	chr19	+	23141216	p1@Klf9	NM_010638	intronic	mmu-mir-1192
chr19	-	25036053	chr19	-	24961563	p1@Cbwd1	NM_146097	intronic	mmu-mir-3084-1
chr19	+	29175905	chr19	+	29101415	p1@Rcl1	NM_021525	intronic	mmu-mir-101b
chr19	-	34952343	chr19	-	34877853	p1@Pank1	NM_023792	intronic	mmu-mir-107
chr19	+	34996851	chr19	+	34922361	p1@Kif20b	NM_183046	intronic	mmu-mir-1950
chr19	-	40588233	chr19	-	40513743	p1@Sorbs1	NM_178362	intronic	mmu-novelmir-1398
chr19	-	40662872	chr19	-	40588382	p1@Aldh18a1	ENSMUST00000175932.1	intronic	mmu-novelmir-1399
chr19	+	40905776	chr19	+	40831286	p1@Ccnj	NM_172839	intronic	mmu-novelmir-1400
chr19	+	40969218	chr19	+	40894728	p1@Zfp518a	NM_028319	intronic	mmu-mir-8092
chr19	-	41151562	chr19	-	41077072	p1@Opalin	NM_153520	intronic	mmu-novelmir-1401
chr19	+	43764315	chr19	+	43689825	p1@Entpd7	NM_053103	intronic	mmu-novelmir-1402
chr19	+	44368578	chr19	+	44294088	p1@Scd2	NM_009128	intronic	mmu-mir-5114
chr19	-	44482051	chr19	-	44407561	p1@Scd1	NM_009127	intronic	mmu-novelmir-1404,mmu-novelmir-1403
chr19	+	44831198	chr19	+	44756708	p@chr19:44831187..44831204,+	ENSMUST00000174490.5	intronic	mmu-mir-6405
chr19	-	45635020	chr19	-	45560530	p1@Poll	ENSMUST00000026239.6	intronic	mmu-novelmir-1405
chr19	-	45734974	chr19	-	45660484	p1@Fbxw4	ENSMUST00000046869.7	intronic	mmu-novelmir-1406
chr19	+	46131052	chr19	+	46056562	p1@Pprc1	ENSMUST00000099392.6	intronic	mmu-novelmir-1407
chr19	-	46413110	chr19	-	46338620	p1@Cuedc2	NM_024192	intronic	mmu-novelmir-1408
chr19	+	46415611	chr19	+	46341121	p2@Tmem180	ENSMUST00000128041.4	intronic	mmu-mir-146b
chr19	-	47389243	chr19	-	47314753	p2@Sh3pxd2a	NM_008018	intronic	mmu-mir-6995
chr19	+	47654122	chr19	+	47579632	p1@Slk	ENSMUST00000026043.8	intronic	mmu-novelmir-1409
chr19	-	47911877	chr19	-	47837387	p1@ENSMUST00000099350,p1@ENSMUST00000160247	ENSMUST00000160247.1	intronic	mmu-mir-8090
chr19	-	53113060	chr19	-	53038570	p1@Xpnpep1	ENSMUST00000183274.4	intronic	mmu-novelmir-1410,mmu-mir-6407
chr19	+	53751898	chr19	+	53677408	p1@Rbm20	XM_001002314	intronic	mmu-novelmir-1411
chr19	+	55255216	chr19	+	55180726	p1@Tectb	ENSMUST00000120936.4	intronic	mmu-mir-6715
chr19	+	56622981	chr19	+	56548491	p1@Nhlrc2	NM_025811	intronic	mmu-novelmir-1412
chr19	+	57685561	chr19	+	57611071	p1@Atrnl1	NM_181415	intronic	mmu-mir-5623
chr19	-	60866561	chr19	-	60790658	p1@Eif3a	NM_010123	intronic	mmu-mir-3084-2
chrX	-	6896355	chrX	-	7319229	p1@Clcn5	ENSMUST00000115746.4	intronic	mmu-mir-532,mmu-mir-188,mmu-mir-362,mmu-mir-501,mmu-mir-500
chrX	+	7156802	chrX	+	7579676	p1@Foxp3	ENSMUST00000115740.4	intronic	mmu-novelmir-1413
chrX	+	7367119	chrX	+	7789993	p1@Gripap1	ENSMUST00000136930.4	intronic	mmu-mir-1198
chrX	+	7419206	chrX	+	7842080	p1@Otud5	ENSMUST00000115668.6	intronic	mmu-novelmir-1414
chrX	+	7624324	chrX	+	8047198	p1@ENSMUST00000119726	ENSMUST00000145941.2	intergenic	mmu-novelmir-1415
chrX	-	7753050	chrX	-	8175924	p1@Tbc1d25	ENSMUST00000143984.1	intronic	mmu-novelmir-1416
chrX	-	18744369	chrX	-	19167243	p1@ENSMUST00000150801,p1@uc009ssq.1	curation	intergenic	mmu-mir-222,mmu-mir-221
chrX	-	20498044	chrX	-	20920918	p1@Syn1	ENSMUST00000081893.6	intronic	mmu-mir-5617
chrX	+	33428817	chrX	+	35888822	p1@Dock11	NM_001009947	intronic	mmu-novelmir-1418
chrX	-	49967127	chrX	-	52613950	p1@Gpc3	NM_016697	intronic	mmu-mir-717,mmu-mir-6384
chrX	-	50097768	chrX	-	52744591	p1@Kis2	curation	intronic	mmu-mir-106a,mmu-mir-18b,mmu-mir-20b,mmu-mir-19b-2,mmu-mir-92a-2,mmu-mir-363
chrX	-	50410367	chrX	-	53057190	p1@C430049B03Rik	curation	intergenic	mmu-mir-322,mmu-mir-503,mmu-mir-351,mmu-mir-542,mmu-mir-450a-2,mmu-mir-450a-1,mmu-mir-450b
chrX	-	53851119	chrX	-	56597942	p1@Mmgt1	NM_146234	intronic	mmu-mir-5116
chrX	-	56387944	chrX	-	59134767	p1@Fgf13	NM_010200	intronic	mmu-mir-504
chrX	-	57657178	chrX	-	60404003	p1@Atp11c	NM_001001798	intronic	mmu-mir-505
chrX	-	64129339	chrX	-	66876164	p@chrX:64129336..64129342,-	curation	intergenic	mmu-mir-465d,mmu-mir-880,mmu-mir-463,mmu-mir-883b,mmu-mir-883a,mmu-mir-742,mmu-mir-465a,mmu-mir-465b-2,mmu-mir-465c-2,mmu-mir-465b-1,mmu-mir-465c-1,mmu-mir-470,mmu-mir-871,mmu-mir-881,mmu-mir-878,mmu-mir-741,mmu-mir-471,mmu-mir-743b,mmu-mir-743a
chrX	+	68809165	chrX	+	71555990	p1@Hmgb3	ENSMUST00000088874.6	intronic	mmu-novelmir-1423
chrX	-	69520090	chrX	-	72274751	p1@Gabre	NM_017369	intronic	mmu-mir-452,mmu-mir-224
chrX	-	69901503	chrX	-	72656164	p1@Gabra3	NM_008067	intronic	mmu-mir-105,mmu-mir-767
chrX	+	70232699	chrX	+	72987360	p1@Zfp185	ENSMUST00000114546.5	intronic	mmu-mir-2137
chrX	+	70918506	chrX	+	73673167	p1@Slc6a8	NM_133987	intronic	mmu-novelmir-1424
chrX	-	71211681	chrX	-	73966342	p1@Hcfc1	ENSMUST00000114372.2	intronic	mmu-novelmir-1425
chrX	-	71269165	chrX	-	74023826	p1@Irak1	ENSMUST00000148706.4	intronic	mmu-novelmir-1427,mmu-novelmir-1426,mmu-mir-5132
chrX	-	71491751	chrX	-	74246412	p1@Flna	ENSMUST00000144429.4	intronic	mmu-novelmir-1428
chrX	+	71500156	chrX	+	74254817	p1@Emd	ENSMUST00000119197.4	intronic	mmu-novelmir-1429
chrX	-	71526965	chrX	-	74281626	p1@Dnase1l1	ENSMUST00000114189.5	intronic	mmu-mir-7091
chrX	+	71558409	chrX	+	74313070	p1@Fam50a	NM_138607	intronic	mmu-mir-7092
chrX	-	71618609	chrX	-	74373270	p1@Slc10a3	ENSMUST00000178691.1	intronic	mmu-novelmir-1430
chrX	+	74756357	chrX	+	77511018	p1@Tbl1x	ENSMUST00000088217.8	intronic	mmu-novelmir-1431
chrX	-	86005658	chrX	-	88760319	p@chrX:86005657..86005658,-	ENSMUST00000182943.1	intergenic	mmu-mir-1906-2
chrX	+	91480678	chrX	+	94235339	p6@Klhl15	ENSMUST00000113915.1	intronic	mmu-mir-7673
chrX	+	92907034	chrX	+	95711695	p1@Zc3h12b	NM_001034907	intronic	mmu-novelmir-1433
chrX	+	93435281	chrX	+	96239942	p1@ENSMUST00000133125	ENSMUST00000133125.2	intergenic	mmu-mir-223
chrX	+	97170974	chrX	+	99975635	p1@Eda	NM_010099	intronic	mmu-mir-676
chrX	-	98463540	chrX	-	101268201	p1@Il2rg	NM_013563	intronic	mmu-novelmir-1434
chrX	-	100819093	chrX	-	103623754	p1@B230206F22Rik	ENSMUST00000130063.4	intergenic	mmu-novelmir-1436,mmu-mir-374b,mmu-mir-421
chrX	-	101396472	chrX	-	104201133	p1@C77370	ENSMUST00000056502.6	intronic	mmu-mir-672
chrX	-	102587093	chrX	-	105391754	p1@5330434G04Rik	curation	intergenic	mmu-mir-325,mmu-mir-384
chrX	-	104598699	chrX	-	107403360	p1@Itm2a	NM_008409	intronic	mmu-novelmir-1437
chrX	-	110299120	chrX	-	113185511	p1@Chm	ENSMUST00000135821.4	intronic	mmu-mir-361
chrX	+	117403936	chrX	+	120290327	p1@Pcdh11x	NM_001081385	intronic	mmu-novelmir-1438
chrX	+	130593888	chrX	+	134059349	p1@Cstf2	NM_133196	intronic	mmu-mir-3112,mmu-novelmir-1440
chrX	+	131291138	chrX	+	134756599	p1@Armcx3	NM_027870	intronic	mmu-mir-7093
chrX	+	132277272	chrX	+	135742733	p1@Armcx5,p1@Gprasp1	ENSMUST00000113144.4	intronic	mmu-mir-7646
chrX	+	133200997	chrX	+	136666458	p1@Tceal3	NM_001029978	intronic	mmu-novelmir-1441
chrX	+	139115958	chrX	+	142681415	p1@Tmem164	ENSMUST00000101198.5	intronic	mmu-mir-652
chrX	+	141123495	chrX	+	144688952	p1@Zcchc16	NM_001033795	intronic	mmu-mir-3472
chrX	+	143397056	chrX	+	146962513	p1@Htr2c	NM_008312	intronic	mmu-mir-764,mmu-mir-1264,mmu-mir-1298,mmu-mir-448,mmu-mir-3552,mmu-mir-1912
chrX	-	147022667	chrX	-	150588124	p1@Apex2	ENSMUST00000112727.6	intronic	mmu-mir-3620
chrX	-	147451804	chrX	-	151017261	p1@Gnl3l	NM_198110	intronic	mmu-novelmir-1443
chrX	+	148237867	chrX	+	151803324	p1@Huwe1	NM_021523	intronic	mmu-let-7f-2,mmu-mir-98,mmu-mir-3113
chrX	-	159326322	chrX	-	162888390	p1@Syap1	NM_025932	intronic	mmu-mir-3473a

## Sheet: TableS12c
Primary miRNAs, rat, after manual curation
Chromosome	Strand	TSS	Promoter name	Primary microRNA	Intronic/intergenic	Pre-microRNAs
chr1	-	21854774	chr1:21854771..21854776,-	NM_022266	intronic	rno-novelmir-1
chr1	+	59701198	chr1:59701194..59701203,+	XM_017589727	intronic	rno-mir-99b,rno-let-7e,rno-mir-125a
chr1	-	64147077	chr1:64147071..64147093,-	NM_001107471	intronic	rno-mir-3572
chr1	+	80092393	chr1:80092386..80092408,+	NM_138921	intronic	rno-mir-330
chr1	+	80293569	chr1:80293557..80293580,+	NM_001172809	intronic	rno-mir-343
chr1	-	88066238	chr1:88066235..88066239,-	XM_017590442	intronic	rno-novelmir-2
chr1	+	125024833	chr1:125024832..125024833,+	NM_001037734	intronic	rno-mir-211
chr1	+	141218072	chr1:141218059..141218073,+	curation	intergenic	rno-mir-9a-3
chr1	-	142332600	chr1:142332592..142332609,-	XM_017590165	intronic	rno-novelmir-4
chr1	+	143354106	chr1:143354092..143354110,+	XR_590363	intergenic	rno-mir-1839
chr1	+	161183678	chr1:161183677..161183678,+	XM_017589179	intronic	rno-mir-708
chr1	+	164502179	chr1:164502168..164502193,+	XM_006229740	intronic	rno-mir-326
chr1	-	165966819	chr1:165966812..165966826,-	ENSRNOT00000089359	intergenic	rno-mir-3102
chr1	+	166564723	chr1:166564722..166564723,+	NM_031079	intronic	rno-mir-139
chr1	-	212317291	chr1:212317277..212317322,-	curation	intergenic	rno-mir-202
chr1	-	214208691	chr1:214208681..214208692,-	XR_350841	intergenic	rno-mir-210
chr1	-	215746967	chr1:215746963..215746970,-	NR_027324	intergenic	rno-mir-675
chr1	-	215834714	chr1:215834710..215834717,-	NM_001190162	intronic	rno-mir-483
chr1	+	221633309	chr1:221633297..221633312,+	curation	intronic	rno-mir-194-2,rno-mir-192
chr1	+	240350511	chr1:240350510..240350514,+	NM_001191562	intronic	rno-mir-204
chr1	+	247256555	chr1:247256549..247256561,+	NM_001013152	intronic	rno-mir-101b
chr1	-	253185469	chr1:253185462..253185476,-	NM_001106373	intronic	rno-mir-107
chr1	+	266088712	chr1:266088707..266088712,+	curation	intergenic	rno-mir-146b
chr2	+	40792340	chr2:40792334..40792357,+	NM_001113332	intronic	rno-mir-582
chr2	+	165601226	chr2:165601212..165601231,+	NM_001037185	intronic	rno-mir-15b,rno-mir-16
chr2	-	179704609	chr2:179704608..179704647,-	NM_017261	intronic	rno-mir-2985
chr2	+	187581690	chr2:187581683..187581692,+	XR_001836802	intergenic	rno-mir-9a-1
chr2	+	188476786	chr2:188476771..188476797,+	XM_008761192	intronic	rno-mir-3541
chr2	+	243819840	chr2:243819834..243819845,+	XM_008761488	intronic	rno-mir-1956
chr2	+	263864305	chr2:263864293..263864313,+	NM_031616	intronic	rno-mir-186
chr3	+	4037597	chr3:4037591..4037638,+	NM_139104	intronic	rno-mir-126a
chr3	-	6024976	chr3:6024964..6024981,-	XM_006233830	intronic	rno-mir-7578
chr3	+	23120597	chr3:23120596..23120600,+	curation	intergenic	rno-mir-181a-2,rno-mir-181b-2
chr3	+	114772603	chr3:114772597..114772611,+	NM_001008518	intronic	rno-mir-147
chr3	+	123807968	chr3:123807934..123807974,+	NM_001106513	intronic	rno-mir-103-2
chr3	+	175766307	chr3:175766305..175766312,+	curation	intergenic	rno-mir-1b
chr4	-	7113891	chr4:7113877..7113928,-	NM_001106574	intronic	rno-mir-671
chr4	-	21757664	chr4:21757594..21757664,-	NM_001109345	intronic	rno-mir-879
chr4	+	56282854	chr4:56282851..56282857,+	curation	intergenic	rno-mir-129-1
chr4	-	58367514	chr4:58367513..58367515,-	curation	intergenic	rno-mir-29b-1,rno-mir-29a
chr4	-	157252095	chr4:157252089..157252100,-	curation	intergenic	rno-mir-200c,rno-mir-141
chr5	+	57028475	chr5:57028473..57028476,+	NM_022934	intronic	rno-mir-207
chr5	-	73986382	chr5:73986379..73986404,-	XM_008763737	intronic	rno-mir-32
chr5	+	79055311	chr5:79055306..79055318,+	NM_198747	intronic	rno-mir-455
chr5	+	107178156	chr5:107178148..107178162,+	curation	intergenic	rno-mir-31a
chr5	+	113592973	chr5:113592947..113592992,+	NM_001007001	intronic	rno-mir-872
chr5	-	120186557	chr5:120186551..120186598,-	curation	intergenic	rno-mir-101a
chr5	+	128630002	chr5:128629984..128630012,+	XM_006238499	intronic	rno-mir-761
chr5	-	139731732	chr5:139731731..139731733,-	NM_012866	intronic	rno-mir-30e,rno-mir-30c-1
chr5	+	150725672	chr5:150725655..150725690,+	NM_001013168	intronic	rno-mir-3583
chr5	+	153835530	chr5:153835503..153835530,+	XM_017593585	intronic	rno-mir-6333
chr5	+	167071728	chr5:167071719..167071733,+	curation	intergenic	rno-mir-34a
chr5	+	167331023	chr5:167331017..167331027,+	NM_053885	intronic	rno-mir-6332
chr5	-	173494518	chr5:173494512..173494526,-	NR_132445	intergenic	rno-mir-429,rno-mir-200b,rno-mir-200a
chr6	+	10912331	chr6:10912313..10912368,+	NM_001100756	intronic	rno-mir-3558
chr6	-	91676403	chr6:91676398..91676417,-	NM_001170586	intronic	rno-mir-3084b-2,rno-mir-3084b-1
chr6	-	103605385	chr6:103605378..103605395,-	XM_008764782	intronic	rno-mir-1843a
chr6	-	111476770	chr6:111476763..111476792,-	NM_001108718	intronic	rno-mir-3068
chr6	+	132470000	chr6:132469997..132470007,+	NM_024147	intronic	rno-mir-342
chr6	+	132748027	chr6:132748024..132748029,+	curation	intergenic	rno-mir-345
chr6	+	133658931	chr6:133658929..133658934,+	curation	intergenic	rno-mir-337,rno-mir-540,rno-mir-127,rno-mir-434-1,rno-mir-434-2,rno-mir-136,rno-mir-379,rno-mir-411,rno-mir-299a,rno-mir-380,rno-mir-329,rno-mir-376a,rno-mir-6331,rno-mir-382,rno-mir-485,rno-mir-409a,rno-mir-369,rno-mir-770,rno-mir-673,rno-mir-493,rno-mir-665,rno-mir-431,rno-mir-433,rno-mir-341,rno-mir-1188,rno-mir-370,rno-mir-323,rno-mir-758,rno-mir-494,rno-mir-679,rno-mir-1193,rno-mir-666,rno-m…
chr6	-	134626988	chr6:134626987..134626988,-	Dio3os	intergenic	rno-mir-1247
chr6	+	136682333	chr6:136682318..136682344,+	curation	intronic	rno-mir-203a
chr6	+	144400628	chr6:144400623..144400629,+	XM_017594060	intronic	rno-mir-153
chr7	+	66802422	chr7:66802394..66802422,+	curation	intergenic	rno-let-7i
chr7	-	109315905	chr7:109315900..109315909,-	curation	intergenic	rno-mir-30d
chr7	-	114570404	chr7:114570403..114570404,-	NM_013081	intronic	rno-mir-151
chr7	+	123381080	chr7:123381059..123381090,+	NM_001033694	intronic	rno-mir-33
chr7	-	125893171	chr7:125893164..125893176,-	NM_001271047	intronic	rno-mir-1249
chr7	+	126567373	chr7:126567365..126567375,+	curation	intergenic	rno-let-7c-2,rno-let-7b
chr7	-	130161538	chr7:130161523..130161544,-	NM_001108106	intronic	rno-mir-349
chr7	+	144612466	chr7:144612447..144612473,+	curation	intronic	rno-mir-615
chr7	+	144900117	chr7:144900112..144900120,+	NM_001108117	intronic	rno-mir-148b
chr8	+	45691788	chr8:45691783..45691790,+	NR_126581	intergenic	rno-mir-100,rno-let-7a-2
chr8	+	45797631	chr8:45797622..45797645,+	NR_126581	intergenic	rno-mir-125b-1
chr8	-	55492970	chr8:55492969..55492982,-	curation	intronic	rno-mir-34b,rno-mir-34c
chr8	-	56697281	chr8:56697275..56697287,-	curation	intronic	rno-mir-6329
chr8	-	73441514	chr8:73441497..73441518,-	XM_008766404	intronic	rno-mir-190a-1
chr8	+	79660667	chr8:79660651..79660706,+	XM_008766318	intronic	rno-mir-628
chr8	+	114866769	chr8:114866759..114866790,+	NM_001271306	intronic	rno-let-7g
chr8	+	117353593	chr8:117353591..117353595,+	curation	intergenic	rno-mir-191a,rno-mir-425
chr8	-	120474723	chr8:120474721..120474747,-	XM_008766635	intronic	rno-mir-128-2
chr8	+	127171410	chr8:127171397..127171426,+	NM_001106865	intronic	rno-mir-26a
chr8	+	131628089	chr8:131628087..131628090,+	curation	intergenic	rno-mir-138-1
chr9	+	29526552	chr9:29526547..29526555,+	curation	intergenic	rno-mir-30a,rno-mir-30c-2
chr9	+	81672511	chr9:81672478..81672518,+	NM_001128079	intronic	rno-mir-26b
chr9	+	99998422	chr9:99998395..99998427,+	NM_030828	intronic	rno-mir-149
chr10	-	10881987	chr10:10881979..10881992,-	NM_001013964	intronic	rno-mir-3568
chr10	-	14613898	chr10:14613896..14613899,-	NM_001312663	intronic	rno-mir-3547
chr10	+	19924071	chr10:19924051..19924080,+	NM_031321	intronic	rno-mir-218a-2
chr10	+	20591430	chr10:20591412..20591442,+	NM_001108272	intronic	rno-mir-103-1
chr10	-	28973552	chr10:28973547..28973557,-	curation	intergenic	rno-mir-146a
chr10	+	35333877	chr10:35333871..35333887,+	XM_017597479	intronic	rno-mir-336
chr10	+	35537998	chr10:35537973..35538176,+	NM_001037658	intronic	rno-mir-340-1,rno-mir-340-2
chr10	-	52301940	chr10:52301923..52301958,-	NM_001030023	intronic	rno-mir-744
chr10	+	56837678	chr10:56837677..56837698,+	curation	intergenic	rno-mir-497,rno-mir-195
chr10	+	62013904	chr10:62013901..62013905,+	DQ223059	intergenic	rno-mir-212,rno-mir-132
chr10	+	62297565	chr10:62297558..62297572,+	FQ225953	intergenic	rno-mir-22,rno-mir-6326
chr10	-	62664456	chr10:62664455..62664457,-	NM_031814	intronic	rno-novelmir-6
chr10	+	63098108	chr10:63098087..63098114,+	NM_001037189	intronic	rno-mir-423
chr10	-	65291768	chr10:65291767..65291768,-	FQ225534	intergenic	rno-mir-144,rno-mir-451
chr10	-	65443991	chr10:65443960..65443992,-	NM_001108283	intronic	rno-novelmir-7
chr10	+	65767945	chr10:65767942..65767948,+	NM_019156	intronic	rno-novelmir-8
chr10	+	67065299	chr10:67065293..67065301,+	curation	intergenic	rno-mir-193a,rno-mir-365
chr10	-	70342427	chr10:70342418..70342431,-	XM_006246999	intronic	rno-novelmir-9
chr10	-	73905088	chr10:73905044..73905100,-	XM_006247078	intronic	rno-mir-21
chr10	+	74413980	chr10:74413972..74413982,+	NM_001009624	intronic	rno-mir-301a
chr10	+	75049730	chr10:75049725..75049736,+	curation	intergenic	rno-mir-142
chr10	+	84112271	chr10:84112234..84112273,+	XR_001840269	intronic	rno-mir-196c
chr10	+	84147872	chr10:84147871..84147906,+	curation	intronic	rno-mir-10a
chr10	+	84718815	chr10:84718810..84718819,+	NM_001108294	intronic	rno-mir-152
chr10	-	94987868	chr10:94987866..94987868,-	XM_008768313	intronic	rno-mir-3064
chr10	-	101711393	chr10:101711392..101711396,-	XR_001840320	intronic	rno-mir-297
chr10	-	109197870	chr10:109197869..109197870,-	XM_006247927	intronic	rno-mir-338
chr10	-	109267590	chr10:109267585..109267598,-	NM_001108310	intronic	rno-mir-3562,rno-mir-3594
chr11	+	16050325	chr11:16050324..16050327,+	curation	intergenic	rno-mir-99a,rno-let-7c-1,rno-mir-125b-2
chr11	+	24165759	chr11:24165754..24165759,+	curation	intergenic	rno-mir-155
chr11	+	33568785	chr11:33568783..33568794,+	curation	intergenic	rno-mir-802
chr11	-	36384839	chr11:36384838..36384839,-	XM_006248186	intronic	rno-mir-6324
chr11	-	44293129	chr11:44293117..44293135,-	NM_130419	intronic	rno-novelmir-11
chr11	+	47260556	chr11:47260554..47260558,+	NM_001107095	intronic	rno-novelmir-12
chr11	-	79827635	chr11:79827621..79827660,-	XM_006248505	intronic	rno-mir-28
chr11	+	86797530	chr11:86797524..86797539,+	NM_001108323	intronic	rno-mir-185
chr11	+	86852710	chr11:86852695..86852732,+	NM_001105865	intronic	rno-mir-1306
chr11	+	88122288	chr11:88122279..88122311,+	curation	intronic	rno-mir-130b,rno-mir-301b
chr12	+	16988063	chr12:16988057..16988070,+	XM_006248975	intronic	rno-novelmir-14
chr12	+	17277629	chr12:17277596..17277637,+	NM_001025033	intronic	rno-mir-339
chr12	-	19313923	chr12:19313909..19313938,-	NM_001004203	intronic	rno-mir-106b,rno-mir-93,rno-mir-25
chr12	-	22726780	chr12:22726742..22726794,-	NM_178101	intronic	rno-mir-702
chr12	-	37480334	chr12:37480307..37480337,-	XM_006249327	intronic	rno-novelmir-15
chr12	-	39769473	chr12:39769472..39769488,-	NM_001107141	intronic	rno-novelmir-16
chr13	+	44812618	chr13:44812595..44812629,+	XM_008769460	intronic	rno-mir-128-1
chr13	+	54885180	chr13:54885166..54885185,+	curation	intergenic	rno-mir-181a-1,rno-mir-181b-1
chr13	+	76055533	chr13:76055532..76055552,+	NM_001170603	intronic	rno-mir-488
chr13	+	76943284	chr13:76943275..76943294,+	XM_006250113	intronic	rno-mir-1843b
chr13	+	80125337	chr13:80125332..80125342,+	curation	intergenic	rno-mir-199a
chr13	-	80218590	chr13:80218579..80218592,-	NM_138538	intronic	rno-mir-3120
chr13	-	94887377	chr13:94887371..94887385,-	XM_008769812	intronic	rno-mir-350-2
chr13	+	103157705	chr13:103157683..103157719,+	NM_001040154	intronic	rno-mir-664-2
chr13	+	103249591	chr13:103249589..103249592,+	curation	intergenic	rno-mir-194-1,rno-mir-215
chr13	-	112235888	chr13:112235788..112235923,-	curation	intergenic	rno-mir-205
chr13	+	113771358	chr13:113771321..113771367,+	curation	intergenic	rno-mir-29c-2,rno-mir-29b-3
chr14	-	21144764	chr14:21144753..21144778,-	XR_001841024	intronic	rno-mir-6321
chr14	-	30332719	chr14:30332695..30332719,-	XR_001841103	intergenic	rno-mir-193b
chr14	-	67171726	chr14:67171724..67171727,-	XM_017599278	intronic	rno-mir-218a-1
chr14	-	85350796	chr14:85350786..85350809,-	NM_001025632	intronic	rno-novelmir-19
chr15	-	33657694	chr15:33657691..33657696,-	XM_017599642	intronic	rno-mir-208b,rno-mir-208a
chr15	+	46784532	chr15:46784520..46784533,+	NM_001012042	intronic	rno-mir-598-1,rno-mir-598-2
chr15	+	100178157	chr15:100178149..100178167,+	curation	intergenic	rno-mir-17-1,rno-mir-18a,rno-mir-19a,rno-mir-20a,rno-mir-92a-1,rno-mir-19b-1
chr16	+	1749218	chr16:1749207..1749227,+	XM_006252539	intronic	rno-mir-3075
chr16	+	11170559	chr16:11170558..11170559,+	NM_024378	intronic	rno-mir-346
chr16	+	57455862	chr16:57455841..57455866,+	NM_001108875	intronic	rno-mir-383
chr17	+	763754	chr17:763737..763759,+	XM_017600473	intronic	rno-mir-23b,rno-mir-27b,rno-mir-24-1
chr17	+	6665619	chr17:6665613..6665628,+	XM_006253553	intronic	rno-mir-7a-1
chr17	+	6924469	chr17:6924467..6924470,+	XM_006253568	intronic	rno-mir-874
chr17	+	9631912	chr17:9631903..9631929,+	NM_001108046	intronic	rno-mir-3542-2
chr17	-	10575485	chr17:10575482..10575492,-	XM_006253629	intronic	rno-novelmir-24
chr17	+	16409406	chr17:16409400..16409411,+	curation	intergenic	rno-let-7a-1,rno-let-7f-1,rno-let-7d
chr17	-	22143402	chr17:22143401..22143405,-	NM_012548	intronic	rno-novelmir-25
chr17	-	71902540	chr17:71902539..71902540,-	XM_006254213	intronic	rno-novelmir-42,rno-novelmir-41,rno-novelmir-40,rno-novelmir-39,rno-novelmir-38,rno-novelmir-37,rno-novelmir-36,rno-novelmir-35,rno-novelmir-34,rno-novelmir-33,rno-novelmir-32,rno-novelmir-31,rno-novelmir-30,rno-novelmir-29,rno-novelmir-28,rno-novelmir-27,rno-novelmir-26,rno-mir-466b-1,rno-mir-466b-2
chr17	+	81352684	chr17:81352681..81352685,+	NM_001106123	intronic	rno-mir-511
chr17	-	89923782	chr17:89923773..89923787,-	XM_017600582	intronic	rno-novelmir-48
chr18	+	1970834	chr18:1970828..1970846,+	NM_001107405	intronic	rno-mir-133c,rno-mir-3571
chr18	+	28351709	chr18:28351701..28351719,+	XM_017600886	intronic	rno-mir-1949
chr18	-	56728970	chr18:56728958..56728973,-	ENSRNOT00000023661	intergenic	rno-mir-378a
chr18	-	56988949	chr18:56988945..56988951,-	curation	intergenic	rno-mir-143,rno-mir-145
chr18	+	60750831	chr18:60750825..60750850,+	NM_001025057	intronic	rno-mir-122
chr19	-	25134025	chr19:25134024..25134044,-	NM_001107161	intronic	rno-mir-1199
chr19	-	25295185	chr19:25295178..25295222,-	curation	intergenic	rno-mir-181d,rno-mir-181c
chr19	+	25311027	chr19:25311022..25311028,+	curation	intergenic	rno-mir-23a,rno-mir-27a,rno-mir-24-2
chr19	-	26053844	chr19:26053841..26053865,-	NM_181089	intronic	rno-mir-3550
chr19	+	39602744	chr19:39602738..39602750,+	NM_001106184	intronic	rno-mir-140
chr19	+	43392080	chr19:43392067..43392092,+	NM_001106187	intronic	rno-mir-3084a
chr20	+	3309943	chr20:3309929..3309968,+	NM_001109883	intronic	rno-mir-877
chr20	-	5865850	chr20:5865844..5865866,-	NM_001025726	intronic	rno-novelmir-51
chr20	-	6864418	chr20:6864397..6864440,-	NM_001034188	intronic	rno-novelmir-52
chr20	+	12429314	chr20:12429307..12429324,+	NM_001011945	intronic	rno-novelmir-54
chr20	+	13156202	chr20:13156196..13156213,+	NM_001025144	intronic	rno-mir-678
chr20	-	14095203	chr20:14095191..14095208,-	XM_003751948	intronic	rno-novelmir-55
chrX	+	3662341	chrX:3662337..3662342,+	curation	intergenic	rno-mir-222,rno-mir-221
chrX	+	16048427	chrX:16048423..16048430,+	curation	intergenic	rno-mir-532,rno-mir-362,rno-mir-501,rno-mir-188,rno-mir-500
chrX	+	21474517	chrX:21474471..21474528,+	XR_001842623	intergenic	rno-let-7f-2,rno-mir-98
chrX	-	33516339	chrX:33516333..33516348,-	XM_006256896	intronic	rno-novelmir-56
chrX	-	38118978	chrX:38118972..38118981,-	NM_053360	intronic	rno-novelmir-57
chrX	+	65364410	chrX:65364408..65364420,+	curation	intergenic	rno-mir-223
chrX	+	68891221	chrX:68891212..68891227,+	NM_017089	intronic	rno-mir-3573
chrX	+	70058746	chrX:70058737..70058748,+	NM_001305243	intronic	rno-mir-676
chrX	-	74484178	chrX:74484169..74484191,-	NR_130116	intergenic	rno-mir-421,rno-mir-374
chrX	-	75566297	chrX:75566278..75566306,-	XM_008773348	intronic	rno-mir-3559
chrX	-	76344862	chrX:76344861..76344863,-	curation	intergenic	rno-mir-325,rno-mir-384
chrX	-	84821792	chrX:84821782..84821799,-	NM_017067	intronic	rno-mir-361
chrX	+	113948673	chrX:113948667..113948674,+	NM_001109014	intronic	rno-mir-652
chrX	+	118084542	chrX:118084541..118084543,+	XM_017601920	intronic	rno-mir-3552,rno-mir-764,rno-mir-1912,rno-mir-1298,rno-mir-448
chrX	-	143525690	chrX:143525682..143525698,-	XM_017602408	intronic	rno-mir-505
chrX	-	152237377	chrX:152237375..152237378,-	NM_023091	intronic	rno-mir-452,rno-mir-224
chrX	-	152641633	chrX:152641625..152641640,-	XM_017601916	intronic	rno-mir-105
chrX	+	156716563	chrX:156716553..156716568,+	XM_006229598	intronic	rno-mir-5132

## Sheet: TableS12d
Primary miRNAs, dog, after manual curation
Chromosome	Strand	TSS	Promoter name	Primary microRNA	Intronic/intergenic	Pre-microRNAs
chr1	-	17598591	chr1:17598590..17598593,-	curation	intergenic	cfa-mir-122
chr1	-	49037981	chr1:49037955..49037993,-	XM_541181	intronic	cfa-mir-1836
chr1	-	71710895	chr1:71710883..71710895,-	XM_014116160	intronic	cfa-mir-23b,cfa-mir-27b,cfa-mir-24-1
chr1	+	75499788	chr1:75499781..75499800,+	NM_001256548	intronic	cfa-mir-7-1
chr1	+	86764086	chr1:86764052..86764088,+	XM_005615872	intronic	cfa-mir-204
chr1	+	93181933	chr1:93181922..93181939,+	XM_014117828	intronic	cfa-mir-101-2
chr1	-	97912936	chr1:97912929..97912939,-	curation	intergenic	cfa-let-7f,cfa-let-7d
chr1	+	99045109	chr1:99045095..99045120,+	XM_022422371	intronic	cfa-novelmir-1
chr1	+	104785496	chr1:104785493..104785498,+	NR_128856	intergenic	cfa-mir-8891
chr1	+	107115076	chr1:107115069..107115099,+	XM_005616319	intronic	cfa-mir-8890
chr1	-	109642958	chr1:109642953..109642967,-	XR_002630873	intronic	cfa-mir-769
chr1	+	109921801	chr1:109921796..109921821,+	XM_022424876	intronic	cfa-mir-330
chr2	-	6111935	chr2:6111929..6111951,-	XM_022405927	intronic	cfa-mir-8864-3
chr2	-	46762202	chr2:46762183..46762202,-	XM_005617415	intronic	cfa-mir-582
chr2	+	76050166	chr2:76050164..76050197,+	NR_128866	intergenic	cfa-mir-8897
chr2	-	83929101	chr2:83929095..83929104,-	XM_014111447	intronic	cfa-mir-8896
chr3	+	19991405	chr3:19991404..19991405,+	curation	intergenic	cfa-mir-9-2
chr3	+	54575841	chr3:54575832..54575868,+	XR_002625177	intergenic	cfa-mir-1839
chr3	-	73494366	chr3:73494361..73494375,-	XM_005618632	intronic	cfa-mir-574
chr3	-	89312894	chr3:89312890..89312896,-	curation	intronic	cfa-mir-218-1
chr4	-	8729492	chr4:8729488..8729494,-	ENSCAFT00000019196	intronic	cfa-mir-1841
chr4	-	15180396	chr4:15180395..15180398,-	XM_005618926	intronic	cfa-mir-1296
chr4	-	36954682	chr4:36954659..36954705,-	XM_005619445	intronic	cfa-mir-1271
chr4	+	42507828	chr4:42507822..42507836,+	XM_005619226	intronic	cfa-mir-218-2
chr4	+	43168451	chr4:43168442..43168465,+	XM_546251	intronic	cfa-mir-103-1
chr4	-	59278957	chr4:59278944..59278961,-	XM_546308	intronic	cfa-mir-378
chr4	-	59553295	chr4:59553292..59553300,-	curation	intergenic	cfa-mir-143,cfa-mir-145
chr5	+	12000529	chr5:12000525..12000532,+	XM_014113216	intronic	cfa-mir-99a-2,cfa-let-7a-2
chr5	+	12097029	chr5:12097017..12097042,+	XR_002626400	intergenic	cfa-mir-125b-1
chr5	-	16421419	chr5:16421414..16421420,-	NR_128824	intergenic	cfa-mir-8871
chr5	-	32047510	chr5:32047498-32047513,-	curation	intergenic	cfa-mir-497,cfa-mir-195
chr5	-	32202133	chr5:32202124..32202137,-	curation	intronic	cfa-mir-324
chr5	+	32713796	chr5:32713757..32713804,+	XM_005620001	intronic	cfa-mir-8867
chr5	+	41677193	chr5:41677190..41677195,+	XM_022418000	intronic	cfa-mir-33b
chr5	+	45183707	chr5:45183704..45183708,+	XM_014113710	intronic	cfa-mir-101-1
chr5	+	56364251	chr5:56364247..56364255,+	XM_022418882	intronic	cfa-mir-200b,cfa-mir-200a,cfa-mir-429
chr5	-	58146029	chr5:58146028..58146029,-	XM_022418957	intronic	cfa-mir-551a
chr5	-	62508255	chr5:62508243..62508257,-	curation	intergenic	cfa-mir-34a
chr5	-	79820962	chr5:79820952..79820973,-	XM_022418019	intronic	cfa-mir-140
chr6	-	6190308	chr6:6190300..6190320,-	XM_014114129	intronic	cfa-mir-590
chr6	+	9492566	chr6:9492553..9492572,+	XM_844716	intronic	cfa-mir-106b,cfa-mir-93,cfa-mir-25
chr6	+	12435018	chr6:12435003..12435023,+	XM_022419762	intronic	cfa-mir-589
chr6	+	15764692	chr6:15764690..15764694,+	XM_022419823	intronic	cfa-mir-8879
chr6	+	15848861	chr6:15848854..15848867,+	XM_014114347	intronic	cfa-mir-339-1
chr6	+	21081970	chr6:21081960..21081980,+	XM_005621398	intronic	cfa-mir-8878
chr6	+	39682239	chr6:39682236..39682259,+	XM_547204	intronic	cfa-mir-8877
chr6	+	74870255	chr6:74870250..74870258,+	curation	intronic	cfa-mir-186
chr7	+	3980357	chr7:3980345..3980359,+	curation	intergenic	cfa-mir-181a-1,cfa-mir-181b-1
chr7	+	22454132	chr7:22454131..22454132,+	curation	intronic	cfa-mir-488
chr7	+	23320562	chr7:23320559..23320568,+	XM_022421014	intronic	cfa-mir-1843
chr7	+	26812585	chr7:26812582..26812591,+	curation	intergenic	cfa-mir-199-2,cfa-mir-214
chr7	-	34395448	chr7:34395434..34395452,-	XM_022421129	intronic	cfa-mir-350
chr7	+	35917161	chr7:35917141..35917164,+	XM_014115252	intronic	cfa-mir-7180
chr7	+	41508167	chr7:41508166..41508167,+	curation	intergenic	cfa-mir-9-1
chr7	+	66212053	chr7:66212033..66212056,+	curation	intergenic	cfa-mir-133a,cfa-mir-1-2
chr7	-	80974466	chr7:80974460..80974471,-	NR_128818	intergenic	cfa-mir-8865
chr8	+	32848207	chr8:32848185..32848214,+	NR_128842	intergenic	cfa-mir-8883
chr8	-	53824379	chr8:53824367..53824385,-	XM_022422296	intronic	cfa-mir-8884
chr8	+	68409966	chr8:68409961..68409970,+	XM_537553	intronic	cfa-mir-342
chr8	+	69053010	chr8:69053007..69053012,+	curation	intergenic	cfa-mir-493,cfa-mir-127,cfa-mir-136,cfa-mir-379,cfa-mir-411,cfa-mir-299,cfa-mir-1185,cfa-mir-487a,cfa-mir-382,cfa-mir-485,cfa-mir-665,cfa-mir-433,cfa-mir-432,cfa-mir-370,cfa-mir-380,cfa-mir-323,cfa-mir-758,cfa-mir-329b,cfa-mir-329a,cfa-mir-494,cfa-mir-543,cfa-mir-495,cfa-mir-3958,cfa-mir-376a-3,cfa-mir-376c,cfa-mir-376a-2,cfa-mir-376b,cfa-mir-376a-1,cfa-mir-300,cfa-mir-381,cfa-mir-487b,cfa-mir-53…
chr8	+	71773817	chr8:71773815-71773817,+	ENSCAFT00000045020	intergenic	cfa-mir-203
chr9	-	3777230	chr9:3777128..3777246,-	XR_293085	intergenic	cfa-mir-6516
chr9	-	24335299	chr9:24335284..24335330,-	curation	intronic	cfa-mir-152
chr9	-	24844725	chr9:24844720..24844743,-	XM_022423071	intronic	cfa-mir-10a
chr9	+	32760781	chr9:32760774..32760785,+	XM_861812	intronic	cfa-mir-1844
chr9	-	32978403	chr9:32978398..32978408,-	curation	intergenic	cfa-mir-142
chr9	-	33728292	chr9:33728285..33728304,-	XM_003639296	intronic	cfa-mir-301a,cfa-mir-454
chr9	+	34337393	chr9:34337383..34337403,+	curation	intergenic	cfa-mir-21
chr9	+	44155623	chr9:44155613..44155638,+	XM_863270	intronic	cfa-mir-423a
chr9	-	45854751	chr9:45854743..45854756,-	curation	intergenic	cfa-mir-22
chr9	-	48887203	chr9:48887200..48887204,-	XM_022423575	intronic	cfa-mir-126
chr9	-	54631248	chr9:54631241..54631259,-	XM_005625255	intronic	cfa-mir-8887
chr9	+	55136823	chr9:55136797-55136843,+	curation	intergenic	cfa-mir-219-2
chr9	+	55234868	chr9:55234854..55234887,+	ENSCAFT00000031945	intronic	cfa-mir-199-3
chr9	-	58339816	chr9:58339809..58339839,-	XR_293256	intergenic	cfa-mir-181a-2,cfa-mir-181b-2
chr10	+	270022	chr10:270016..270033,+	XM_022424030	intronic	cfa-novelmir-3
chr10	-	1898642	chr10:1898605..1898648,-	XM_538256	intronic	cfa-mir-26a-2
chr10	+	13288163	chr10:13288159..13288183,+	XM_003431437	intronic	cfa-novelmir-4
chr10	-	16929864	chr10:16929846..16929875,-	XM_022424252	intronic	cfa-novelmir-5
chr10	-	20065464	chr10:20065457..20065464,-	curation	intergenic	cfa-let-7b,cfa-let-7a-1
chr10	+	20809515	chr10:20809509..20809541,+	XM_005625759	intronic	cfa-mir-1249
chr10	+	23195806	chr10:23195799..23195808,+	XM_022424348	intronic	cfa-mir-8829
chr10	-	23513507	chr10:23513504..23513523,-	XM_843994	intronic	cfa-novelmir-6,cfa-mir-33a
chr10	+	27295634	chr10:27295610..27295635,+	XM_538392	intronic	cfa-mir-1835
chr11	-	25467448	chr11:25467438..25467453,-	XM_022425325	intronic	cfa-mir-874
chr11	+	26736758	chr11:26736751..26736765,+	XM_014117660	intronic	cfa-novelmir-7
chr11	+	40265749	chr11:40265742..40265757,+	XM_005626671	intronic	cfa-mir-491
chr11	+	45161082	chr11:45161078..45161109,+	XM_531964	intronic	cfa-mir-872
chr11	+	50156071	chr11:50156065..50156076,+	NM_001252143	intronic	cfa-mir-207
chr11	+	52074216	chr11:52074210..52074234,+	XM_022425560	intronic	cfa-novelmir-10
chr11	-	64267059	chr11:64267053..64267090,-	XM_005626906	intronic	cfa-mir-32
chr11	+	65133224	chr11:65133218..65133230,+	XM_005626417	intronic	cfa-novelmir-12
chr11	+	68420913	chr11:68420871..68420913,+	XM_014117999	intronic	cfa-mir-455
chr11	+	74248236	chr11:74248234..74248237,+	XM_022425034	intronic	cfa-novelmir-13
chr12	-	33800685	chr12:33800672..33800706,-	curation	intergenic	cfa-mir-30a,cfa-mir-30c-2
chr12	-	36887642	chr12:36887637..36887655,-	NR_128781	intergenic	cfa-mir-8835
chr13	+	28571086	chr13:28571067..28571091,+	XM_532333	intronic	cfa-novelmir-15
chr13	-	35508850	chr13:35508848..35508851,-	XM_005627994	intronic	cfa-mir-151
chr14	-	4077420	chr14:4077416..4077436,-	XM_539369	intronic	cfa-novelmir-18
chr14	+	6170686	chr14:6170684..6170687,+	XR_293959	intergenic	cfa-mir-29b-1,cfa-mir-29a
chr14	-	6449124	chr14:6449119..6449125,-	XM_022427214	intronic	cfa-mir-335
chr14	+	7064171	chr14:7064154..7064208,+	XR_293960	intergenic	cfa-mir-183,cfa-mir-96,cfa-mir-182
chr15	-	2334908	chr15:2334887..2334913,-	XM_005628865	intronic	cfa-mir-30e,cfa-mir-30c-1
chr15	-	6068670	chr15:6068663..6068678,-	XM_014119600	intronic	cfa-novelmir-19
chr15	+	9413899	chr15:9413889..9413910,+	XM_854556	intronic	cfa-mir-761
chr15	+	35162803	chr15:35162785..35162821,+	curation	intronic	cfa-mir-331
chr16	-	11665613	chr16:11665594..11665613,-	XM_005629578	intronic	cfa-mir-490
chr16	+	15273397	chr16:15273358..15273407,+	curation	intronic	cfa-mir-671
chr16	-	15785952	chr16:15785945..15785962,-	XM_014119809	intronic	cfa-mir-8855
chr16	-	26410600	chr16:26410599..26410602,-	XM_022404029	intronic	cfa-mir-8799d
chr16	-	35499452	chr16:35499444..35499484,-	XR_002614699	intronic	cfa-mir-8848
chr17	+	13022375	chr17:13022343..13022378,+	XR_002615043	intergenic	cfa-mir-8845
chr18	-	33011829	chr18:33011812..33011845,-	XM_533153	intronic	cfa-mir-1343
chr18	-	38580751	chr18:38580741..38580754,-	XM_022405112	intronic	cfa-novelmir-22
chr18	+	38653724	chr18:38653717..38653748,+	XM_005631205	intronic	cfa-novelmir-23
chr18	-	46301701	chr18:46301694..46301702,-	NM_001195827	intronic	cfa-mir-483
chr18	-	46690975	chr18:46690973..46690980,-	NR_128814	intergenic	cfa-mir-8859b
chr18	-	51707871	chr18:51707864..51707892,-	NR_128809	intergenic	cfa-mir-8858
chr18	+	52279200	chr18:52279198..52279201,+	XR_294764	intergenic	cfa-mir-192,cfa-mir-194-2
chr19	+	38302766	chr19:38302741..38302776,+	XM_022406117	intronic	cfa-mir-128-1
chr19	+	45208745	chr19:45208732..45208746,+	XM_533345	intronic	cfa-novelmir-27
chr20	+	7665460	chr20:7665452..7665464,+	XM_005632157	intronic	cfa-mir-885
chr20	+	37494646	chr20:37494624..37494656,+	XM_854531	intronic	cfa-let-7g
chr20	+	40078151	chr20:40078149..40078156,+	XM_533833	intronic	cfa-novelmir-29
chr20	-	44394340	chr20:44394336..44394354,-	XM_005632682	intronic	cfa-mir-8803
chr20	+	48615117	chr20:48615115..48615118,+	curation	intergenic	cfa-mir-23a,cfa-mir-27a,cfa-mir-24-2
chr20	+	50410790	chr20:50410789..50410790,+	curation	intergenic	cfa-mir-199-1
chr20	+	50747160	chr20:50747145..50747177,+	XM_022407058	intronic	cfa-novelmir-31
chr20	-	54994522	chr20:54994521..54994522,-	XR_002616967	intergenic	cfa-mir-7-3
chr21	+	18083750	chr21:18083738..18083753,+	XM_022407592	intronic	cfa-mir-708
chr21	+	20414889	chr21:20414875..20414899,+	XM_014122569	intronic	cfa-mir-1838
chr21	+	25570705	chr21:25570693..25570706,+	XM_846858	intronic	cfa-mir-139
chr21	+	32099809	chr21:32099784..32099815,+	NM_001252225	intronic	cfa-novelmir-32
chr22	+	1835440	chr22:1835437..1835441,+	XR_002617820	intronic	cfa-mir-15a,cfa-mir-16-1
chr22	+	42477694	chr22:42476683..42476761,+	curation	intergenic	cfa-mir-17,cfa-mir-18a,cfa-mir-20a,cfa-mir-92a-1,cfa-mir-19a,cfa-mir-19b-1
chr23	+	5819334	chr23:5819333..5819334,+	XM_844441	intronic	cfa-mir-128-2
chr23	+	7647000	chr23:7646997..7647001,+	XM_014106491	intronic	cfa-mir-26a-1
chr24	+	5021705	chr24:5021704..5021710,+	XM_022409221	intronic	cfa-novelmir-34
chr24	-	17471282	chr24:17471281..17471282,-	XM_022409053	intronic	cfa-mir-103-2
chr24	-	22893984	chr24:22893977..22893984,-	XM_022409403	intronic	cfa-novelmir-36
chr24	+	24000292	chr24:24000288..24000301,+	XM_534397	intronic	cfa-mir-499
chr24	-	26921738	chr24:26921733..26921748,-	XR_002618527	intergenic	cfa-novelmir-37
chr24	+	35956753	chr24:35956751..35956759,+	XR_002618638	intergenic	cfa-novelmir-38
chr24	+	46477558	chr24:46477553..46477558,+	curation	intergenic	cfa-mir-1-1,cfa-mir-133c
chr25	+	9710986	chr25:9710971..9710990,+	XM_022409975	intronic	cfa-mir-8825
chr25	-	28679245	chr25:28679236..28679257,-	XM_022409735	intronic	cfa-mir-8821
chr25	-	43340177	chr25:43340174..43340180,-	XM_845384	intronic	cfa-novelmir-41
chr26	+	14522036	chr26:14522033..14522043,+	NM_001048092	intronic	cfa-mir-8819
chr26	-	28567494	chr26:28567479..28567522,-	XM_851878	intronic	cfa-novelmir-42
chr26	-	29219210	chr26:29219202..29219239,-	XM_534758	intronic	cfa-novelmir-43
chr26	-	29260977	chr26:29260970..29260983,-	curation	intronic	cfa-mir-1306
chr26	+	30923326	chr26:30923325..30923326,+	XR_295780	intergenic	cfa-mir-130b,cfa-mir-301b
chr26	-	38714843	chr26:38714842..38714844,-	XM_534781	intronic	cfa-novelmir-44
chr27	-	983018	chr27:983011..983027,-	XM_843171	intronic	cfa-mir-148b
chr27	-	1247292	chr27:1247285..1247297,-	XM_022411242	intronic	cfa-mir-615
chr27	-	34587479	chr27:34587472..34587484,-	XM_005637150	intronic	cfa-novelmir-45
chr27	-	38082606	chr27:38082605..38082613,-	curation	intergenic	cfa-mir-200c,cfa-mir-141
chr28	-	4534476	chr28:4534461..4534494,-	XM_843829	intronic	cfa-mir-107
chr28	-	15767811	chr28:15767797..15767826,-	XM_005637687	intronic	cfa-mir-1307
chr28	+	15902080	chr28:15902069..15902086,+	XM_014109059	intronic	cfa-mir-8816
chr28	+	35928050	chr28:35928047..35928050,+	XM_022411679	intronic	cfa-novelmir-48
chr30	+	15365652	chr30:15365651..15365654,+	XM_005638397	intronic	cfa-novelmir-50
chr30	-	16114787	chr30:16114767..16114805,-	XM_005638400	intronic	cfa-mir-8791a
chr30	-	20795506	chr30:20795482..20795523,-	XM_544691	intronic	cfa-mir-628
chr30	+	27023734	chr30:27023728..27023739,+	XM_022412706	intronic	cfa-mir-190a
chr30	-	30771812	chr30:30771807..30771816,-	NM_001252409	intronic	cfa-novelmir-51
chr31	+	13150399	chr31:13150386..13150401,+	XR_002621552	intergenic	cfa-mir-99a-1,cfa-let-7c,cfa-mir-125b-2
chr31	+	31003665	chr31:31003664..31003665,+	curation	intergenic	cfa-mir-802
chr31	+	32587838	chr31:32587837..32587838,+	XM_022413325	intronic	cfa-novelmir-52
chr31	+	33860144	chr31:33860141..33860145,+	XM_022413104	intronic	cfa-novelmir-53
chr32	-	1650655	chr32:1650628..1650657,-	XM_005639092	intronic	cfa-novelmir-54
chr33	-	23659783	chr33:23659780..23659785,-	XM_851518	intronic	cfa-mir-6529
chr34	+	20542851	chr34:20542802..20542856,+	XM_022414367	intronic	cfa-mir-28
chr34	+	26455688	chr34:26455673..26455707,+	XM_535848	intronic	cfa-mir-15b,cfa-mir-16-2
chr34	-	32879099	chr34:32879089..32879114,-	XM_014110420	intronic	cfa-novelmir-58
chr35	-	212931	chr35:212927..212949,-	XM_014110614	intronic	cfa-novelmir-59
chr36	+	19945754	chr36:19945749..19945756,+	curation	intergenic	cfa-mir-10b
chr37	-	15605737	chr37:15605721..15605742,-	XM_022415275	intronic	cfa-mir-2355
chr37	+	25051766	chr37:25051754..25051774,+	XM_005640643	intronic	cfa-mir-26b
chr38	-	14896571	chr38:14896551..14896572,-	curation	intergenic	cfa-mir-194,cfa-mir-215
chr38	-	15025556	chr38:15025521..15025561,-	XM_022415452	intronic	cfa-mir-664
chr38	-	17579429	chr38:17579421..17579442,-	NR_128738	intergenic	cfa-mir-8798
chrX	-	33017599	chrX:33017585..33017621,-	XM_005641244	intronic	cfa-novelmir-61
chrX	-	39547388	chrX:39547386..39547390,-	curation	intergenic	cfa-mir-222,cfa-mir-221
chrX	+	42705030	chrX:42705027..42705037,+	ENSCAFT00000025340	intronic	cfa-mir-532,cfa-mir-188,cfa-mir-500,cfa-mir-362,cfa-mir-660,cfa-mir-502,cfa-mir-500b
chrX	-	45406960	chrX:45406929..45406965,-	XM_005641381	intronic	cfa-mir-98
chrX	+	54078199	chrX:54078198..54078200,+	XM_022415518	intronic	cfa-mir-676
chrX	+	55487805	chrX:55487798..55487816,+	XM_003640219	intronic	cfa-novelmir-64
chrX	-	57595709	chrX:57595698..57595725,-	XR_002624140	intergenic	cfa-mir-545,cfa-mir-374a,cfa-mir-374b,cfa-mir-421
chrX	-	66880231	chrX:66880210..66880242,-	XM_022415599	intronic	cfa-mir-361
chrX	+	83219584	chrX:83219580..83219584,+	XM_005641668	intronic	cfa-mir-652
chrX	+	90571183	chrX:90571175..90571188,+	XM_538149	intronic	cfa-mir-1277
chrX	-	91816344	chrX:91816343..91816374,-	XM_005641743	intronic	cfa-novelmir-67
chrX	-	96565928	chrX:96565927..96565940,-	XM_022415597	intronic	cfa-mir-2483
chrX	-	105186415	chrX:105186397..105186435,-	curation	intergenic	cfa-mir-503,cfa-mir-450a,cfa-mir-450b,cfa-mir-424,cfa-mir-542
chrX	-	109156099	chrX:109156093..109156107,-	XM_022415872	intronic	cfa-mir-504
chrX	-	109877457	chrX:109877448..109877460,-	XM_005641888	intronic	cfa-mir-505
chrX	-	119937815	chrX:119937814..119937821,-	XM_549340	intronic	cfa-novelmir-69,cfa-mir-452,cfa-mir-224

## Sheet: TableS12e
Primary miRNAs, chicken, after manual curation
Chromosome (galGal5)	Strand (galGal5)	TSS (galGal5)	Chromosome (galGal6)	Strand (galGal6)	TSS (galGal6)	Promoter name	Primary microRNA	Intronic/intergenic	Pre-microRNAs
chr1	+	272905	chr1	+	552633	chr1:272884..272909,+	XM_015283915	intronic	gga-mir-6708,gga-mir-1604
chr1	+	494416	chr1	+	1133726	chr1:494400..494428,+	XM_015280721	intronic	gga-mir-1651
chr1	-	847648	chr1	-	1483117	chr1:847647..847648,-	XR_001466918	intergenic	gga-mir-96,gga-mir-182,gga-mir-183
chr1	-	908550	chr1	-	1544016	chr1:908540..908562,-	NM_001199437	intronic	gga-mir-6676
chr1	+	908906	chr1	+	1544372	chr1:908892..908924,+	XM_425257	intronic	gga-mir-6629
chr1	-	1322156	chr1	-	1956960	chr1:1322130..1322172,-	XM_015286002	intronic	gga-mir-205b
chr1	-	1841487	chr1	-	2511922	chr1:1841480..1841494,-	NM_001199320	intronic	gga-mir-6659
chr1	+	3403209	chr1	+	3998835	chr1:3403201..3403214,+	curation	intergenic	gga-mir-29b-1,gga-mir-29a
chr1	+	5778498	chr1	+	6314420	chr1:5778491..5778517,+	NM_204260	intronic	gga-mir-1596
chr1	-	7010949	chr1	-	7544731	chr1:7010932..7010969,-	XM_015298970	intronic	gga-mir-1460
chr1	-	20739339	chr1	-	20898259	chr1:20739311..20739353,-	XM_423623	intronic	gga-mir-1693
chr1	-	23413393	chr1	-	23554766	chr1:23413392..23413395,-	XM_416005	intronic	gga-mir-1645
chr1	+	29577523	chr1	+	29702679	chr1:29577514..29577535,+	NM_001305257	intronic	gga-mir-7447
chr1	-	31000363	chr1	-	31121730	chr1:31000361..31000364,-	NM_001305439	intronic	gga-novelmir-3
chr1	+	49300570	chr1	+	49276516	chr1:49300542..49300589,+	XM_015289183	intronic	gga-mir-1581
chr1	-	49545124	chr1	-	49511586	chr1:49545111..49545132,-	XM_015289037	intronic	gga-mir-33-1
chr1	+	50725888	chr1	+	50691590	chr1:50725882..50725894,+	NM_001006241	intronic	gga-mir-3538
chr1	-	57953534	chr1	-	57897249	chr1:57953529..57953538,-	XM_015285631	intronic	gga-mir-490
chr1	-	59417576	chr1	-	59345976	chr1:59417557..59417596,-	XM_416367	intronic	gga-mir-6700
chr1	+	65764659	chr1	+	65711233	chr1:65764658..65764662,+	XM_015290218	intronic	gga-mir-6608-2,gga-mir-6608-1
chr1	+	65938287	chr1	+	65884879	chr1:65938278..65938292,+	XM_015290196	intronic	gga-novelmir-4,gga-novelmir-5
chr1	+	71540737	chr1	+	71449108	chr1:71540726..71540760,+	XM_015290010	intronic	gga-mir-1727
chr1	-	76917955	chr1	-	77584554	chr1:76917953..76917956,-	XR_001468675	intronic	gga-mir-6553
chr1	+	92335513	chr1	+	93749602	chr1:92335498..92335548,+	XM_015298269	intronic	gga-mir-6616
chr1	-	93976733	chr1	-	95381217	chr1:93976725..93976753,-	XM_015298389	intronic	gga-mir-1806
chr1	+	98950095	chr1	+	100327065	chr1:98950082..98950097,+	CR387321	intergenic	gga-mir-99a,gga-let-7c,gga-mir-125b-2
chr1	+	104732052	chr1	+	106074397	chr1:104732016..104732068,+	XM_015299710	intronic	gga-mir-1738
chr1	+	105831411	chr1	+	107173741	chr1:105831410..105831411,+	XM_015300178	intronic	gga-mir-3525
chr1	+	110629478	chr1	+	111945988	chr1:110629474..110629483,+	XR_001470600	intergenic	gga-mir-222a,gga-mir-221
chr1	+	126886674	chr1	+	128198765	chr1:126886648..126886686,+	XM_015274042	intronic	gga-mir-1397
chr1	-	131301937	chr1	-	132560621	chr1:131301936..131301937,-	XM_001233420	intronic	gga-mir-1805
chr1	+	133651369	chr1	+	134881534	chr1:133651341..133651390,+	XM_015277799	intronic	gga-mir-1656,gga-mir-1552
chr1	+	136570149	chr1	+	137927298	chr1:136570122..136570152,+	XM_015277864	intronic	gga-mir-1700
chr1	-	139203762	chr1	-	140540195	chr1:139203753..139203798,-	XM_416955	intronic	gga-mir-1736
chr1	-	145109322	chr1	-	146535795	chr1:145109315..145109330,-	XM_015274341	intronic	gga-mir-1555
chr1	-	148027067	chr1	-	149443652	chr1:148027062..148027071,-	ENSGALT00000062008	intergenic	gga-mir-17,gga-mir-18a,gga-mir-19a,gga-mir-20a,gga-mir-19b,gga-mir-92-1
chr1	+	156675661	chr1	+	158037642	chr1:156675651..156675668,+	XM_015275212	intronic	gga-mir-1743
chr1	+	165879563	chr1	+	167213751	chr1:165879545..165879610,+	XM_417028	intronic	gga-mir-2127
chr1	-	167143160	chr1	-	168477411	chr1:167143154..167143165,-	XM_015276655	intronic	gga-mir-6555
chr1	+	168999975	chr1	+	170318542	chr1:168999960..168999998,+	NM_001012826	intronic	gga-novelmir-10
chr1	-	169420833	chr1	-	170739395	chr1:169420823..169420842,-	curation	intergenic	gga-mir-15a,gga-mir-16-1
chr1	-	175241088	chr1	-	176569384	chr1:175241083..175241092,-	XR_001464281	intergenic	gga-mir-1646
chr1	-	176342503	chr1	-	177658052	chr1:176342496..176342508,-	XM_417127	intronic	gga-novelmir-11
chr1	+	179181039	chr1	+	180486128	chr1:179181023..179181044,+	NM_001030831	intronic	gga-mir-6641
chr1	-	182386450	chr1	-	183673157	chr1:182386407..182386455,-	XM_015279695	intronic	gga-mir-7449
chr1	+	185027175	chr1	+	186278770	chr1:185027168..185027191,+	XM_015280608	intronic	gga-mir-6570
chr1	-	185922145	chr1	-	187165998	chr1:185922132..185922159,-	XM_004938871	intronic	gga-novelmir-12
chr1	+	188343778	chr1	+	189576218	chr1:188343773..188343785,+	XM_015280353	intronic	gga-mir-1657
chr1	-	190158782	chr1	-	191382165	chr1:190158777..190158786,-	XR_001464892	intergenic	gga-mir-1664
chr1	-	195360381	chr1	+	196503384	chr1:195360375..195360430,-	XM_015280993	intronic	gga-mir-1708
chr2	+	396894	chr2	+	457137	chr2:396841..396909,+	XM_015281201	intronic	gga-mir-1749
chr2	-	737789	chr2	-	798028	chr2:737770..737814,-	NM_001012851	intronic	gga-mir-6710
chr2	+	1742598	chr2	+	1814982	chr2:1742595..1742602,+	NM_001097523	intronic	gga-mir-1662
chr2	-	2556819	chr2	-	2610492	chr2:2556812..2556821,-	NM_001171601	intronic	gga-mir-6713
chr2	-	3294738	chr2	-	3348468	chr2:3294737..3294745,-	XM_015281135	intronic	gga-mir-1639
chr2	+	3598478	chr2	+	3652243	chr2:3598469..3598488,+	NM_001177575	intronic	gga-mir-460a
chr2	-	3876535	chr2	-	3930301	chr2:3876525..3876552,-	NM_001006353	intronic	gga-mir-1706
chr2	+	4514767	chr2	+	4568567	chr2:4514749..4514780,+	XM_015281052	intronic	gga-mir-26a
chr2	+	4864482	chr2	+	4915798	chr2:4864459..4864496,+	XM_418527	intronic	gga-mir-6610
chr2	-	5858399	chr2	-	5901744	chr2:5858398..5858401,-	NM_204317	intronic	gga-mir-6600
chr2	-	9185989	chr2	-	9239269	chr2:9185985..9186016,-	XM_015281608	intronic	gga-mir-153
chr2	+	14127014	chr2	+	14138954	chr2:14127007..14127041,+	XM_418573	intronic	gga-mir-1768
chr2	-	19830809	chr2	-	19802856	chr2:19830797..19830815,-	NM_001048076	intronic	gga-mir-1661
chr2	+	21746780	chr2	+	21718840	chr2:21746770..21746797,+	XM_418645	intronic	gga-mir-466
chr2	-	22863512	chr2	-	22835564	chr2:22863508..22863517,-	NM_001007892	intronic	gga-mir-1650
chr2	-	23225691	chr2	-	23197731	chr2:23225690..23225692,-	XM_425985	intronic	gga-mir-489
chr2	+	24802693	chr2	+	24774321	chr2:24802683..24802734,+	XM_418678	intronic	gga-mir-1685
chr2	-	32178768	chr2	-	32121165	chr2:32178748..32178769,-	curation	intergenic	gga-mir-148a
chr2	-	40435495	chr2	-	40237923	chr2:40435483..40435513,-	XM_004939425	intronic	gga-mir-1622
chr2	-	40930663	chr2	-	40733088	chr2:40930660..40930667,-	curation	intergenic	gga-mir-138-1
chr2	+	45574636	chr2	+	45359742	chr2:45574603..45574650,+	XM_015281700	intronic	gga-mir-1607
chr2	+	45605828	chr2	+	45390935	chr2:45605798..45605829,+	XM_015281701	intronic	gga-mir-128-2
chr2	+	61266017	chr2	+	61065959	chr2:61266012..61266022,+	NM_001012862	intronic	gga-mir-6557
chr2	-	61971033	chr2	-	61770994	chr2:61971018..61971050,-	XM_015275963	intronic	gga-mir-1747
chr2	+	64565852	chr2	+	64356525	chr2:64565838..64565860,+	NM_001006374	intronic	gga-mir-6571
chr2	+	68044860	chr2	+	67779274	chr2:68044823..68044873,+	NM_001006378	intronic	gga-mir-6698
chr2	+	68733425	chr2	+	68467823	chr2:68733419..68733444,+	XM_015282178	intronic	gga-mir-1782
chr2	+	75825308	chr2	+	75601348	chr2:75825305..75825309,+	XM_015282244	intronic	gga-mir-1766
chr2	-	76795392	chr2	-	76572557	chr2:76795364..76795400,-	XM_015282226	intronic	gga-mir-757
chr2	+	77863359	chr2	+	77628440	chr2:77863336..77863371,+	XM_015282261	intronic	gga-mir-1613
chr2	+	83849342	chr2	+	83571670	chr2:83849337..83849347,+	XR_001465282	intergenic	gga-mir-187
chr2	-	84553644	chr2	-	84275965	chr2:84553639..84553658,-	XM_015282350	intronic	gga-mir-32
chr2	+	88215961	chr2	+	87910959	chr2:88215955..88215980,+	XM_015282399	intronic	gga-mir-1816
chr2	-	93881089	chr2	-	93557319	chr2:93881049..93881094,-	XM_015282390	intronic	gga-mir-6584
chr2	-	94295582	chr2	-	93971791	chr2:94295574..94295591,-	XM_419111	intronic	gga-mir-1681
chr2	-	102818083	chr2	-	102520616	chr2:102818081..102818085,-	XR_001464030	intergenic	gga-mir-1a-2,gga-mir-133a-1
chr2	-	104138819	chr2	-	103841367	chr2:104138802..104138869,-	XM_015277991	intronic	gga-mir-1597
chr2	+	114700314	chr2	+	114300081	chr2:114700311..114700315,+	curation	intergenic	gga-mir-124a
chr2	-	115483661	chr2	-	115078531	chr2:115483660..115483670,-	XR_001465429	intergenic	gga-mir-7456
chr2	-	117115955	chr2	-	116692817	chr2:117115934..117115979,-	XM_015282895	intronic	gga-mir-1569
chr2	+	117850587	chr2	+	117418668	chr2:117850584..117850629,+	XM_003640825	intronic	gga-mir-1796
chr2	-	129543306	chr2	-	128829311	chr2:129543290..129543355,-	NM_205143	intronic	gga-mir-6630
chr2	+	131366975	chr2	+	131339065	chr2:131366952..131366987,+	XM_015283006	intronic	gga-mir-1813-1
chr2	-	136122693	chr2	-	136036734	chr2:136122680..136122705,-	XM_003640854	intronic	gga-mir-1467-2,gga-mir-1467-1
chr2	-	137183030	chr2	-	137072165	chr2:137183023..137183034,-	NM_001005798	intronic	gga-mir-1457
chr2	-	142782668	chr2	-	142669146	chr2:142782661..142782672,-	curation	intergenic	gga-mir-30b,gga-mir-30d
chr3	+	1004816	chr3	+	1023378	chr3:1004814..1004824,+	XR_001465576	intergenic	gga-mir-7463
chr3	+	3709703	chr3	+	3709524	chr3:3709688..3709735,+	XM_419313	intronic	gga-mir-1740
chr3	+	4427317	chr3	+	4420681	chr3:4427313..4427324,+	NM_001252141	intronic	gga-mir-6542
chr3	+	7780776	chr3	+	8390385	chr3:7780731..7780777,+	XM_419370	intronic	gga-mir-1792
chr3	-	10107599	chr3	-	10707203	chr3:10107570..10107613,-	XM_015278089	intronic	gga-mir-6711
chr3	+	12503582	chr3	+	12613998	chr3:12503581..12503582,+	XM_015283522	intronic	gga-mir-6631
chr3	+	15591751	chr3	+	15683634	chr3:15591742..15591753,+	NM_205500	intronic	gga-mir-3526
chr3	+	16320123	chr3	+	16411716	chr3:16320118..16320145,+	XM_015283437	intronic	gga-mir-6563
chr3	+	16897527	chr3	+	16985878	chr3:16897516..16897531,+	XM_419377	intronic	gga-mir-7464
chr3	-	22906404	chr3	-	22963124	chr3:22906390..22906416,-	NM_001277576	intronic	gga-mir-1598
chr3	-	31547241	chr3	-	31584230	chr3:31547227..31547272,-	NM_001012567	intronic	gga-mir-456
chr3	+	33860664	chr3	+	33876520	chr3:33860654..33860670,+	NM_001161801	intronic	gga-mir-1717
chr3	+	35612766	chr3	+	35601953	chr3:35612748..35612766,+	NM_001252016	intronic	gga-mir-1784
chr3	+	46068552	chr3	+	46032895	chr3:46068515..46068557,+	XM_015284305	intronic	gga-mir-1734
chr3	+	54276199	chr3	+	54198303	chr3:54276184..54276206,+	XM_015284093	intronic	gga-mir-7462
chr3	+	55382709	chr3	+	55290226	chr3:55382674..55382717,+	XM_015284179	intronic	gga-mir-6568
chr3	-	56965780	chr3	-	56862421	chr3:56965778..56965780,-	NM_001277911	intronic	gga-mir-1454
chr3	+	58188395	chr3	+	58085070	chr3:58188376..58188400,+	XM_015284131	intronic	gga-mir-6697
chr3	-	58629571	chr3	-	58539365	chr3:58629552..58629579,-	XM_015284130	intronic	gga-mir-1660
chr3	+	63048646	chr3	+	62937183	chr3:63048640..63048679,+	XM_015284484	intronic	gga-mir-199b
chr3	-	67620537	chr3	-	67461789	chr3:67620524..67620546,-	XM_015284551	intronic	gga-mir-6699
chr3	+	74171503	chr3	+	73910979	chr3:74171468..74171505,+	XM_015284598	intronic	gga-mir-1677
chr3	-	75924436	chr3	-	75651275	chr3:75924432..75924439,-	XM_015284695	intronic	gga-mir-1686
chr3	+	76121841	chr3	+	75848673	chr3:76121822..76121861,+	XM_419843	intronic	gga-mir-1451
chr3	-	79512763	chr3	-	79236385	chr3:79512737..79512774,-	XM_015284726	intronic	gga-mir-1712
chr3	+	79785259	chr3	+	79508878	chr3:79785250..79785266,+	XM_015284727	intronic	gga-mir-6670
chr3	-	81927265	chr3	-	81643605	chr3:81927264..81927270,-	XM_015284764	intronic	gga-mir-7465
chr3	+	82618113	chr3	+	82334459	chr3:82618106..82618117,+	curation	intergenic	gga-mir-30a,gga-mir-30c-2
chr3	+	97148052	chr3	+	96721288	chr3:97148045..97148060,+	XM_015276026	intronic	gga-mir-6655
chr3	+	97348107	chr3	+	96909930	chr3:97348101..97348112,+	XM_004935759	intronic	gga-mir-1329
chr3	-	107838438	chr3	-	107380858	chr3:107838420..107838460,-	NM_205371	intronic	gga-mir-6690
chr3	-	108050239	chr3	-	107592655	chr3:108050237..108050256,-	curation	intergenic	gga-mir-206,gga-mir-133b
chr4	+	247376	chr4	+	262777	chr4:247374..247377,+	curation	intergenic	gga-mir-223
chr4	+	2662004	chr4	+	2647718	chr4:2662002..2662004,+	XM_015278431	intronic	gga-mir-460b
chr4	-	3285371	chr4	-	3265754	chr4:3285347..3285376,-	XM_015278242	intronic	gga-mir-6689
chr4	-	3997221	chr4	-	3970008	chr4:3997212..3997226,-	curation	intergenic	gga-mir-18b,gga-mir-106,gga-mir-20b
chr4	-	4075125	chr4	-	4047913	chr4:4075119..4075130,-	curation	intergenic	gga-mir-16c,gga-mir-15c
chr4	-	8581098	chr4	-	8541527	chr4:8581089..8581106,-	XM_015278186	intronic	gga-mir-1462
chr4	-	10987371	chr4	-	10935475	chr4:10987367..10987379,-	XM_420270	intronic	gga-mir-1728
chr4	-	12548756	chr4	-	12496829	chr4:12548748..12548767,-	XM_015278588	intronic	gga-mir-1573
chr4	-	13546781	chr4	-	13494849	chr4:13546775..13546788,-	XM_015278599	intronic	gga-mir-1606
chr4	+	13813352	chr4	+	13761435	chr4:13813327..13813378,+	XM_420317	intronic	gga-mir-6614
chr4	-	16646708	chr4	-	16581680	chr4:16646701..16646714,-	XM_420343	intronic	gga-mir-1757
chr4	+	18141509	chr4	+	18071526	chr4:18141485..18141514,+	NM_001277660	intronic	gga-mir-7469
chr4	+	21570517	chr4	+	21423273	chr4:21570499..21570518,+	XM_015285277	intronic	gga-mir-6682
chr4	-	29815231	chr4	-	29571994	chr4:29815230..29815238,-	XM_015276692	intronic	gga-mir-1575
chr4	+	34287984	chr4	+	34025752	chr4:34287956..34288004,+	XM_420451	intronic	gga-mir-6668
chr4	+	39263629	chr4	+	38982610	chr4:39263627..39263629,+	XR_001463625	intergenic	gga-mir-1627
chr4	+	45128577	chr4	+	44809859	chr4:45128563..45128611,+	XM_420536	intronic	gga-mir-6632
chr4	+	46720895	chr4	+	46402178	chr4:46720887..46720900,+	NM_001031142	intronic	gga-mir-1804
chr4	+	48320927	chr4	+	47997111	chr4:48320918..48320940,+	XM_015276450	intronic	gga-mir-1730
chr4	-	51596980	chr4	-	51252075	chr4:51596974..51596985,-	XM_015276151	intronic	gga-mir-1679
chr4	-	59219569	chr4	-	58837407	chr4:59219563..59219592,-	XM_015276104	intronic	gga-mir-122b
chr4	-	63479753	chr4	-	63067107	chr4:63479748..63479760,-	XM_015285434	intronic	gga-mir-1605
chr4	+	64273686	chr4	+	63861004	chr4:64273685..64273690,+	curation	intergenic	gga-mir-383
chr4	-	75767445	chr4	-	75226678	chr4:75767422..75767450,-	XM_015285716	intronic	gga-mir-218-1
chr4	+	76744782	chr4	+	76174507	chr4:76744752..76744836,+	XM_015285728	intronic	gga-mir-1602
chr4	-	79875629	chr4	-	79281864	chr4:79875628..79875629,-	XR_001466432	intronic	gga-mir-1701
chr4	+	83228987	chr4	+	82644756	chr4:83228980..83228993,+	XM_004936224	intronic	gga-mir-6661
chr4	-	85814053	chr4	-	85229236	chr4:85814048..85814093,-	NM_204456	intronic	gga-mir-6705
chr4	-	89103259	chr4	-	88534203	chr4:89103235..89103280,-	XM_004936279	intronic	gga-mir-103-2
chr4	-	89341903	chr4	-	88772752	chr4:89341885..89341925,-	ENSGALT00000025785	intronic	gga-mir-146c
chr4	-	89710226	chr4	-	89132182	chr4:89710216..89710240,-	XM_420883	intronic	gga-mir-1684a
chr4	+	89755540	chr4	+	89177071	chr4:89755516..89755549,+	XM_015286050	intronic	gga-mir-1654
chr4	-	90293352	chr4	-	89714671	chr4:90293334..90293353,-	NM_001012894	intronic	gga-mir-6627
chr5	-	500540	chr5	-	766150	chr5:500528..500551,-	NR_105446	intergenic	gga-mir-6579-2,gga-mir-6579-1
chr5	-	955800	chr5	-	1220839	chr5:955794..955810,-	XM_420936	intronic	gga-mir-1808
chr5	+	2197123	chr5	+	2461612	chr5:2197107..2197128,+	XM_001234166	intronic	gga-mir-1775
chr5	-	8138682	chr5	-	8397416	chr5:8138664..8138704,-	XM_015286514	intronic	gga-mir-1568
chr5	-	10256156	chr5	-	10514872	chr5:10256150..10256177,-	XM_015286500	intronic	gga-mir-1463
chr5	+	15808852	chr5	+	16016141	chr5:15808837..15808858,+	NM_001252068	intronic	gga-mir-1663
chr5	-	17084882	chr5	-	17337285	chr5:17084869..17084884,-	XM_004941525	intronic	gga-mir-1802
chr5	-	23689160	chr5	-	23925115	chr5:23689145..23689178,-	NM_001031192	intronic	gga-mir-6706
chr5	-	24509839	chr5	-	24738508	chr5:24509808..24509845,-	NM_001199657	intronic	gga-mir-6544
chr5	+	24966962	chr5	+	25195629	chr5:24966948..24966971,+	XM_015287134	intronic	gga-mir-6685
chr5	-	26194113	chr5	-	26422796	chr5:26194094..26194125,-	NM_001031196	intronic	gga-mir-6587
chr5	+	30090924	chr5	+	30288109	chr5:30090911..30090949,+	NM_001005791	intronic	gga-mir-6683
chr5	-	31569392	chr5	-	31766569	chr5:31569383..31569418,-	XM_015287347	intronic	gga-mir-1718
chr5	-	32999002	chr5	-	33185870	chr5:32998982..32999012,-	NM_001199713	intronic	gga-mir-3532
chr5	-	37911311	chr5	-	38077302	chr5:37911259..37911317,-	XM_015287673	intronic	gga-mir-6598
chr5	+	39566448	chr5	+	39728240	chr5:39566439..39566461,+	XM_015287419	intronic	gga-mir-1799
chr5	+	45226162	chr5	+	45340517	chr5:45226156..45226189,+	XM_015287759	intronic	gga-mir-1800,gga-mir-6552
chr5	+	50768969	chr5	+	50882734	chr5:50768965..50768969,+	curation	intergenic	gga-mir-203a
chr5	-	51745501	chr5	-	51858713	chr5:51745487..51745537,-	NM_205055	intronic	gga-mir-1771
chr5	-	55338471	chr5	-	55398461	chr5:55338463..55338484,-	XM_015287504	intronic	gga-mir-1578
chr5	-	56564867	chr5	-	56624844	chr5:56564861..56564874,-	XM_015287929	intronic	gga-mir-1676
chr5	-	58140077	chr5	-	58156561	chr5:58140071..58140082,-	XM_015276764	intronic	gga-mir-1703
chr6	-	10449576	chr6	-	11171321	chr6:10449568..10449617,-	XM_015278712	intronic	gga-mir-1772
chr6	-	12587615	chr6	-	13435983	chr6:12587599..12587633,-	XM_015288287	intronic	gga-mir-1590
chr6	+	16936110	chr6	+	17767567	chr6:16936088..16936121,+	NM_204413	intronic	gga-mir-3537
chr6	-	19422646	chr6	-	20253500	chr6:19422640..19422654,-	XM_421664	intronic	gga-mir-107
chr6	+	20053102	chr6	+	21023025	chr6:20053075..20053110,+	XM_015288861	intronic	gga-mir-6657
chr6	+	22346126	chr6	+	23310651	chr6:22346102..22346141,+	NM_001012908	intronic	gga-mir-6604
chr6	+	22790622	chr6	+	23754664	chr6:22790619..22790623,+	XM_015288778	intronic	gga-mir-1674
chr6	+	23141338	chr6	+	24094275	chr6:23141335..23141339,+	curation	intergenic	gga-mir-146b
chr6	+	30061939	chr6	+	30988974	chr6:30061909..30061944,+	XM_421789	intronic	gga-mir-7472
chr6	-	32388889	chr6	-	33302772	chr6:32388886..32388908,-	XM_015289054	intronic	gga-mir-1726
chr6	-	32790749	chr6	-	33704509	chr6:32790743..32790768,-	NM_001270714	intronic	gga-mir-6694
chr7	-	1364976	chr7	-	1399222	chr7:1364968..1364987,-	NM_205439	intronic	gga-mir-1559
chr7	-	5492730	chr7	-	5522553	chr7:5492723..5492739,-	XM_015289267	intronic	gga-mir-1694
chr7	+	5764790	chr7	+	5794613	chr7:5764783..5764818,+	XM_004942501	intronic	gga-mir-6691-1,gga-mir-6691-2
chr7	-	13734289	chr7	-	13681220	chr7:13734269..13734308,-	XM_426572	intronic	gga-mir-1659
chr7	-	16353150	chr7	-	16288465	chr7:16353145..16353176,-	XM_428765	intronic	gga-mir-1713,gga-mir-10b
chr7	+	16807981	chr7	+	16743220	chr7:16807950..16807985,+	NM_001012952	intronic	gga-mir-1570
chr7	-	19149434	chr7	-	19054190	chr7:19149428..19149448,-	XM_001233813	intronic	gga-mir-1733
chr7	-	19463748	chr7	-	19368505	chr7:19463742..19463770,-	XM_004942778	intronic	gga-mir-1591
chr7	+	23810008	chr7	+	23682773	chr7:23809981..23810014,+	XM_015289802	intronic	gga-mir-1582,gga-mir-1553
chr7	+	24432002	chr7	+	24304772	chr7:24432001..24432009,+	XR_001467648	intergenic	gga-mir-1599
chr7	+	30710541	chr7	+	30558540	chr7:30710489..30710552,+	XM_015289912	intronic	gga-mir-128-1
chr8	+	1942269	chr8	+	2324233	chr8:1942253..1942294,+	CR386464	intergenic	gga-mir-181a-1,gga-mir-181b-1
chr8	-	3821663	chr8	-	4201448	chr8:3821655..3821671,-	XM_422211	intronic	gga-mir-1801
chr8	+	4652316	chr8	+	5020475	chr8:4652310..4652321,+	curation	intergenic	gga-mir-199-2,gga-mir-214
chr8	-	5007574	chr8	-	5375676	chr8:5007554..5007582,-	XM_015290442	intronic	gga-mir-1721
chr8	-	5326238	chr8	-	5693953	chr8:5326228..5326246,-	XM_015290241	intronic	gga-mir-6665
chr8	+	7455273	chr8	+	7811878	chr8:7455268..7455288,+	XM_015290325	intronic	gga-mir-1618
chr8	+	7492345	chr8	+	7848950	chr8:7492297..7492368,+	XM_001234658	intronic	gga-mir-1655
chr8	+	11178000	chr8	+	11602637	chr8:11177986..11178009,+	XM_004936545	intronic	gga-mir-6561
chr8	+	12514140	chr8	+	12920193	chr8:12514135..12514145,+	curation	intergenic	gga-mir-137
chr8	+	19787101	chr8	+	20069336	chr8:19787075..19787110,+	NM_001277766	intronic	gga-mir-1665
chr8	+	24198201	chr8	+	24471637	chr8:24198159..24198219,+	XM_422468	intronic	gga-mir-1562
chr8	+	24563369	chr8	+	24836798	chr8:24563360..24563379,+	XM_015291204	intronic	gga-mir-6549
chr8	-	24710066	chr8	-	24983495	chr8:24710051..24710080,-	XM_426662	intronic	gga-mir-6623
chr8	-	28363264	chr8	-	28615485	chr8:28363254..28363290,-	curation	intergenic	gga-mir-101-2
chr9	+	4882090	chr9	+	5058047	chr9:4882081..4882095,+	XM_015277089	intronic	gga-mir-1704
chr9	+	4974588	chr9	+	5149936	chr9:4974570..4974623,+	XM_422654	intronic	gga-mir-1612
chr9	+	5214757	chr9	+	5390099	chr9:5214738..5214757,+	NM_001277706	intronic	gga-mir-1608
chr9	+	5463757	chr9	+	5618158	chr9:5463753..5463759,+	XM_015277059	intronic	gga-mir-1577
chr9	-	7626205	chr9	-	7780571	chr9:7626204..7626219,-	XR_001463780	intergenic	gga-mir-6574
chr9	+	10631851	chr9	+	10771815	chr9:10631815..10631858,+	XM_422593	intronic	gga-mir-1458
chr9	-	13939939	chr9	-	14047602	chr9:13939928..13939942,-	XM_015291585	intronic	gga-mir-1762
chr9	+	15184041	chr9	+	15291664	chr9:15184034..15184054,+	NM_001012600	intronic	gga-mir-6558
chr9	-	15330412	chr9	-	15438027	chr9:15330396..15330420,-	NM_205265	intronic	gga-mir-3535
chr9	-	15678760	chr9	-	15786368	chr9:15678726..15678787,-	XM_422748	intronic	gga-mir-1755
chr9	-	16247674	chr9	-	16355265	chr9:16247673..16247678,-	XR_001468039	intergenic	gga-mir-6617
chr9	-	20563615	chr9	-	20637220	chr9:20563605..20563620,-	XM_015291747	intronic	gga-mir-551
chr9	+	22212688	chr9	+	22276502	chr9:22212662..22212724,+	NM_001007963	intronic	gga-mir-1692
chr9	-	22283192	chr9	-	22347006	chr9:22283180..22283197,-	XM_015291634	intronic	gga-mir-15b,gga-mir-16-2
chr9	-	23052665	chr9	-	23104712	chr9:23052630..23052679,-	NM_001006556	intronic	gga-mir-1658
chr9	-	23658985	chr9	-	23711024	chr9:23658980..23658989,-	XM_015291837	intronic	gga-mir-1793
chr10	-	797334	chr10	-	1327221	chr10:797332..797334,-	XM_015279101	intronic	gga-mir-1670
chr10	-	1140410	chr10	-	1670291	chr10:1140400..1140413,-	XM_015279083	intronic	gga-mir-6692
chr10	-	1301820	chr10	-	1831120	chr10:1301809..1301828,-	XM_015279078	intronic	gga-mir-1688
chr10	-	2334962	chr10	-	2858113	chr10:2334914..2334971,-	XM_015279039	intronic	gga-mir-2128
chr10	+	2464715	chr10	+	2987863	chr10:2464709..2464738,+	NM_001199749	intronic	gga-mir-1794
chr10	-	2630222	chr10	-	3153392	chr10:2630213..2630254,-	NM_001080878	intronic	gga-mir-6575
chr10	-	4339109	chr10	-	4851511	chr10:4339089..4339141,-	XM_004943745	intronic	gga-mir-190a
chr10	+	5613391	chr10	+	6125777	chr10:5613388..5613394,+	XM_015278984	intronic	gga-mir-204-2,gga-mir-1574
chr10	+	9883340	chr10	+	10339789	chr10:9883313..9883344,+	XM_015291940	intronic	gga-mir-1744
chr10	-	13146206	chr10	-	13587425	chr10:13146205..13146233,-	curation	intergenic	gga-mir-7-2,gga-mir-1720
chr10	+	14628710	chr10	+	15061677	chr10:14628703..14628715,+	NM_001278454	intronic	gga-mir-1611
chr10	-	17950080	chr10	-	18364029	chr10:17950067..17950103,-	XM_413904	intronic	gga-mir-1722
chr10	+	19172671	chr10	+	19587119	chr10:19172664..19172688,+	NM_001030553	intronic	gga-mir-6550
chr11	-	620308	chr11	-	575334	chr11:620295..620335,-	NM_001198605	intronic	gga-mir-6709
chr11	-	1382166	chr11	-	1322639	chr11:1382157..1382172,-	XM_015279198	intronic	gga-mir-1616
chr11	-	2009104	chr11	-	1949566	chr11:2009088..2009119,-	NM_001012776	intronic	gga-mir-1643
chr11	-	2177646	chr11	-	2117520	chr11:2177639..2177659,-	curation	intergenic	gga-mir-138-2
chr11	+	8885395	chr11	+	8755914	chr11:8885394..8885397,+	XM_414124	intronic	gga-mir-1789,gga-mir-1791
chr11	-	11250391	chr11	-	11111646	chr11:11250386..11250402,-	XM_001232878	intronic	gga-mir-6589
chr11	+	16185622	chr11	+	15966470	chr11:16185614..16185628,+	NM_001001760	intronic	gga-novelmir-14
chr11	+	18617233	chr11	+	18373276	chr11:18617204..18617248,+	XM_004944292	intronic	gga-mir-1571
chr11	-	18938969	chr11	-	18695005	chr11:18938902..18938981,-	XM_015292674	intronic	gga-mir-1785,gga-mir-1560
chr11	+	19004693	chr11	+	18760729	chr11:19004681..19004708,+	NM_001109939	intronic	gga-mir-6667
chr11	+	19283795	chr11	+	19042153	chr11:19283787..19283813,+	XM_015292592	intronic	gga-mir-140
chr12	+	778372	chr12	+	1165999	chr12:778346..778398,+	XM_015292755	intronic	gga-mir-1563
chr12	-	2545547	chr12	-	2990356	chr12:2545502..2545555,-	XM_015292819	intronic	gga-mir-1678
chr12	-	2978303	chr12	-	3396385	chr12:2978283..2978315,-	NM_001006135	intronic	gga-let-7g
chr12	+	3142557	chr12	+	3555213	chr12:3142538..3142564,+	XM_015292839	intronic	gga-novelmir-15
chr12	-	6100337	chr12	-	6498025	chr12:6100319..6100348,-	curation	intergenic	gga-let-7a-1,gga-let-7f,gga-let-7d
chr12	+	8778594	chr12	+	9176034	chr12:8778571..8778604,+	XM_015293038	intronic	gga-mir-1783
chr12	-	9514091	chr12	-	9901931	chr12:9514073..9514104,-	XM_015293368	intronic	gga-mir-1572
chr12	+	11670182	chr12	+	12044470	chr12:11670158..11670184,+	curation	intronic	gga-mir-191,gga-mir-425,gga-mir-2970
chr12	+	12749621	chr12	+	13123888	chr12:12749598..12749628,+	NM_204314	intronic	gga-mir-1550
chr12	-	16463537	chr12	-	16828370	chr12:16463531..16463544,-	XM_015293232	intronic	gga-mir-1711
chr13	+	2037423	chr13	+	2787807	chr13:2037407..2037432,+	XM_015293599	intronic	gga-mir-1702
chr13	+	4204211	chr13	+	4953904	chr13:4204189..4204217,+	XM_015293583	intronic	gga-mir-218-2
chr13	+	4682783	chr13	+	5432959	chr13:4682767..4682805,+	XR_001468774	intronic	gga-mir-103-1,gga-mir-6569
chr13	-	7804970	chr13	-	8526477	chr13:7804957..7804971,-	XLOC_004728_TCONS_00008509	intergenic	gga-mir-146a
chr13	-	8316901	chr13	-	9038260	chr13:8316886..8316911,-	XM_015293658	intronic	gga-mir-458a
chr13	-	9054711	chr13	-	9772644	chr13:9054706..9054718,-	NM_001085359	intronic	gga-mir-3523
chr13	-	10376381	chr13	-	11082617	chr13:10376375..10376386,-	XM_015293880	intronic	gga-mir-7460
chr13	+	16931492	chr13	+	17545337	chr13:16931459..16931495,+	NM_001045828	intronic	gga-mir-1609
chr14	+	762591	chr14	+	1165844	chr14:762581..762628,+	CR391396	intergenic	gga-mir-193b,gga-mir-365-1
chr14	-	3344935	chr14	-	3739938	chr14:3344907..3344941,-	XM_414778	intronic	gga-mir-1781
chr14	-	4195527	chr14	-	4577555	chr14:4195522..4195533,-	NM_205518	intronic	gga-mir-3533
chr14	+	5208606	chr14	+	5580404	chr14:5208558..5208611,+	NM_001012788	intronic	gga-mir-1551
chr14	+	5784678	chr14	+	6156462	chr14:5784668..5784703,+	XM_015294430	intronic	gga-mir-1554
chr14	-	6181857	chr14	-	6541961	chr14:6181856..6181865,-	NM_001277164	intronic	gga-novelmir-22
chr14	+	6697114	chr14	+	7057221	chr14:6697100..6697123,+	XM_015294481	intronic	gga-mir-1615
chr14	-	7328909	chr14	-	7689013	chr14:7328884..7328930,-	XM_414884	intronic	gga-mir-6548
chr14	+	7756811	chr14	+	8116829	chr14:7756772..7756819,+	XM_004945285	intronic	gga-mir-1786
chr14	+	8052999	chr14	+	8412821	chr14:8052990..8053032,+	XM_015294534	intronic	gga-mir-1644
chr14	-	12448076	chr14	-	12794815	chr14:12448056..12448104,-	XM_015294634	intronic	gga-mir-6714
chr14	-	14227268	chr14	-	14548007	chr14:14227243..14227268,-	XM_015294765	intronic	gga-mir-1588
chr14	-	14309281	chr14	-	14630015	chr14:14309275..14309313,-	XM_015294754	intronic	gga-mir-1715
chr15	-	410707	chr15	-	706301	chr15:410697..410716,-	curation	intergenic	gga-mir-130a,gga-mir-301a
chr15	+	742917	chr15	+	1038502	chr15:742911..742994,+	NM_001030654	intronic	gga-mir-1729,gga-mir-1673
chr15	+	1289137	chr15	+	1578108	chr15:1289135..1289139,+	curation	intergenic	gga-mir-1306
chr15	+	4589419	chr15	+	4857735	chr15:4589392..4589431,+	XM_015275620	intronic	gga-mir-1636
chr15	+	5082041	chr15	+	5338376	chr15:5082025..5082090,+	XM_015275271	intronic	gga-mir-1671
chr15	+	6705784	chr15	+	6946635	chr15:6705750..6705801,+	NM_204189	intronic	gga-mir-6648-1
chr15	+	6959367	chr15	+	7199846	chr15:6959350..6959375,+	XM_015275501	intronic	gga-mir-6635-1
chr15	-	7689664	chr15	-	7930059	chr15:7689650..7689680,-	XM_015275488	intronic	gga-mir-1625
chr15	-	7738840	chr15	-	7979239	chr15:7738827..7738844,-	NM_001080107	intronic	gga-mir-6650
chr15	-	8936998	chr15	-	9177400	chr15:8936991..8937011,-	XM_015275425	intronic	gga-mir-6673
chr15	-	9319504	chr15	-	9559905	chr15:9319480..9319512,-	XM_415267	intronic	gga-mir-12229
chr15	+	10016860	chr15	+	10257244	chr15:10016852..10016900,+	XM_015275374	intronic	gga-mir-1640
chr15	+	10901690	chr15	+	11128027	chr15:10901672..10901704,+	XM_015294919	intronic	gga-novelmir-26
chr15	+	11504687	chr15	+	11722061	chr15:11504668..11504730,+	NM_001007841	intronic	gga-mir-1464
chr16	+	153731	chr16	-	2529815	chr16:153725..153748,+	NM_001004378	intronic	gga-novelmir-27
chr17	+	2309263	chr17	+	2182411	chr17:2309257..2309273,+	XM_015279512	intronic	gga-mir-1707
chr17	+	2485465	chr17	+	2354141	chr17:2485443..2485472,+	NM_001012532	intronic	gga-mir-7441
chr17	+	2936412	chr17	+	2805079	chr17:2936376..2936416,+	XM_015279346	intronic	gga-mir-7442
chr17	+	5198298	chr17	+	5032655	chr17:5198296..5198304,+	curation	intronic	gga-mir-455,gga-mir-6696
chr17	-	5504109	chr17	-	5338444	chr17:5504093..5504123,-	curation	intergenic	gga-mir-219b
chr17	+	5570874	chr17	+	5405207	chr17:5570842..5570877,+	CR385391	intergenic	gga-mir-199-1
chr17	+	6421463	chr17	+	6255509	chr17:6421460..6421464,+	XM_415465	intronic	gga-mir-1753
chr17	+	8206756	chr17	+	8020603	chr17:8206748..8206761,+	XR_213305	intergenic	gga-mir-3528
chr17	-	8245326	chr17	-	8059174	chr17:8245323..8245327,-	XR_001464429	intronic	gga-mir-126
chr17	+	8639590	chr17	+	8453481	chr17:8639577..8639639,+	NM_001031474	intronic	gga-mir-1465
chr17	-	9292105	chr17	-	9106003	chr17:9292086..9292117,-	XM_004946005	intronic	gga-mir-1705
chr17	+	9971126	chr17	+	9785013	chr17:9971118..9971127,+	curation	intergenic	gga-mir-181a-2,gga-mir-181b-2
chr18	+	735888	chr18	+	711788	chr18:735877..735899,+	XM_015295240	intronic	gga-mir-1748
chr18	-	5105691	chr18	-	5049726	chr18:5105688..5105693,-	XM_015295352	intronic	gga-mir-6599
chr18	+	5911017	chr18	+	5836804	chr18:5911012..5911035,+	XM_415648	intronic	gga-mir-1765
chr18	+	6449224	chr18	+	6375005	chr18:6449208..6449234,+	XM_004946166	intronic	gga-novelmir-28
chr18	+	6490364	chr18	+	6416145	chr18:6490356..6490370,+	curation	intergenic	gga-mir-365-2,gga-mir-193a
chr18	-	6966957	chr18	-	6892740	chr18:6966954..6966964,-	NM_204827	intronic	gga-mir-3064
chr18	+	9371732	chr18	+	9278867	chr18:9371627..9371863,+	XM_015295615	intronic	gga-mir-338
chr18	-	9423776	chr18	-	9330906	chr18:9423772..9423782,-	XM_015295628	intronic	gga-mir-6551
chr18	+	9803412	chr18	+	9709932	chr18:9803411..9803413,+	XM_015295582	intronic	gga-mir-7443
chr18	-	10389201	chr18	-	10295725	chr18:10389171..10389219,-	XM_015295485	intronic	gga-mir-1637
chr18	-	10688202	chr18	-	10591944	chr18:10688190..10688211,-	XM_015295459	intronic	gga-mir-1580
chr19	+	57329	chr19	+	253173	chr19:57319..57357,+	XM_015295896	intronic	gga-novelmir-31
chr19	-	512096	chr19	-	699129	chr19:512091..512099,-	curation	intergenic	gga-mir-142
chr19	-	657391	chr19	-	844424	chr19:657367..657396,-	XM_415720	intronic	gga-mir-1698-2,gga-mir-1698-1
chr19	-	1987690	chr19	-	2173286	chr19:1987684..1987695,-	XM_015295946	intronic	gga-mir-1587,gga-mir-1354,gga-mir-1567
chr19	-	5382017	chr19	-	5529687	chr19:5381996..5382022,-	CR353219	intergenic	gga-mir-22
chr19	-	5617057	chr19	-	5764711	chr19:5617041..5617071,-	XM_004946548	intronic	gga-mir-1696,gga-mir-1666
chr19	-	7205131	chr19	-	7342297	chr19:7205124..7205148,-	XM_415873	intronic	gga-mir-130c,gga-mir-301b
chr19	+	7232386	chr19	+	7369552	chr19:7232383..7232388,+	XM_015295781	intronic	gga-mir-1697
chr19	+	7372932	chr19	+	7510096	chr19:7372922..7372942,+	XM_015295787	intronic	gga-mir-21,gga-novelmir-35
chr19	-	8981257	chr19	-	9107195	chr19:8981249..8981288,-	XM_015296177	intronic	gga-mir-1585
chr19	-	9395184	chr19	-	9519016	chr19:9395181..9395186,-	XM_015295886	intronic	gga-mir-1592
chr19	-	9423666	chr19	-	9547499	chr19:9423637..9423683,-	XM_015295871	intronic	gga-mir-1689
chr20	-	657995	chr20	-	655738	chr20:657989..658026,-	NM_001030845	intronic	gga-mir-6664
chr20	-	1021239	chr20	-	1019470	chr20:1021228..1021266,-	XM_004946888	intronic	gga-mir-1558
chr20	-	1434313	chr20	-	1432544	chr20:1434279..1434343,-	XM_417327	intronic	gga-mir-1453
chr20	-	2242378	chr20	-	2166533	chr20:2242372..2242394,-	XM_015296349	intronic	gga-mir-6674
chr20	-	2748939	chr20	-	2617315	chr20:2748934..2748940,-	curation	intronic	gga-mir-499
chr20	+	8311428	chr20	+	8119996	chr20:8311426..8311430,+	curation	intergenic	gga-mir-133a-2,gga-mir-1a-1,gga-mir-1773
chr20	-	8875346	chr20	-	8683942	chr20:8875345..8875357,-	XR_001469649	intergenic	gga-mir-1746
chr20	+	8882272	chr20	+	8690866	chr20:8882267..8882273,+	curation	intergenic	gga-mir-124a-2
chr20	-	9896050	chr20	-	9695774	chr20:9896026..9896075,-	XM_015296601	intronic	gga-mir-1798
chr20	-	10005509	chr20	-	9804421	chr20:10005479..10005514,-	XM_001233780	intronic	gga-mir-12243
chr20	-	11155533	chr20	-	10953423	chr20:11155532..11155534,-	XM_015296547	intronic	gga-mir-6564
chr20	-	12979692	chr20	-	12761265	chr20:12979682..12979698,-	XM_417506	intronic	gga-mir-1619
chr21	-	1754010	chr21	-	1772626	chr21:1754003..1754022,-	XM_015296938	intronic	gga-mir-1635
chr21	-	2603326	chr21	-	2612458	chr21:2603318..2603327,-	curation	intergenic	gga-mir-200b,gga-mir-200a,gga-mir-429
chr21	-	3270441	chr21	-	3279585	chr21:3270436..3270456,-	curation	intergenic	gga-mir-34a
chr22	+	35731	chr22	+	173121	chr22:35725..35736,+	XM_015297343	intronic	gga-mir-6576
chr22	-	460632	chr22	-	598008	chr22:460627..460638,-	XM_015297330	intronic	gga-novelmir-38
chr22	-	915769	chr22	-	1053141	chr22:915757..915793,-	XM_417678	intronic	gga-novelmir-39
chr22	-	2673538	chr22	-	2957694	chr22:2673530..2673543,-	XM_015297396	intronic	gga-mir-2188
chr22	+	4644413	chr22	+	5198767	chr22:4644405..4644434,+	curation	intronic	gga-mir-12247-1
chr23	-	458277	chr23	-	568543	chr23:458257..458310,-	NM_205383	intronic	gga-mir-3531
chr23	+	2221106	chr23	+	2376932	chr23:2221098..2221122,+	XR_001469919	intergenic	gga-mir-124b
chr23	+	2765259	chr23	+	2911571	chr23:2765246..2765281,+	NM_204492	intronic	gga-mir-1724
chr23	+	4354703	chr23	+	4487417	chr23:4354702..4354704,+	XM_015297644	intronic	gga-mir-1b,gga-mir-133c
chr23	+	4927788	chr23	+	5060499	chr23:4927779..4927819,+	XM_015297832	intronic	gga-mir-30e,gga-mir-30c-1
chr23	-	5094852	chr23	-	5228361	chr23:5094843..5094885,-	XM_015297842	intronic	gga-mir-1780
chr24	-	29602	chr24	-	59669	chr24:29592..29604,-	XM_015298010	intronic	gga-mir-1758
chr24	+	1863754	chr24	+	1893831	chr24:1863752..1863760,+	NM_204711	intronic	gga-mir-1601
chr24	+	3228357	chr24	+	3257820	chr24:3228348..3228362,+	XR_001470015	intergenic	gga-mir-100,gga-let-7a-2,gga-mir-6675
chr24	+	4170607	chr24	+	4202425	chr24:4170599..4170638,+	NM_204381	intronic	gga-mir-1466
chr24	-	4826098	chr24	-	4856536	chr24:4826088..4826103,-	XM_015298223	intronic	gga-mir-6612
chr24	-	5186125	chr24	-	5215792	chr24:5186105..5186133,-	XM_015298229	intronic	gga-mir-1745
chr24	-	5346858	chr24	-	5376555	chr24:5346856..5346867,-	XM_003642612	intronic	gga-mir-1667
chr24	+	5538443	chr24	+	5568148	chr24:5538440..5538443,+	XM_004948127	intronic	gga-mir-34c,gga-mir-34b
chr25	-	2126160	chr25	-	2888856	chr25:2126129..2126183,-	NM_001031590	intronic	gga-mir-190b
chr25	+	2126344	chr25	+	2889040	chr25:2126308..2126355,+	XM_015298588	intronic	gga-mir-3536,gga-novelmir-43
chr25	+	2277017	chr25	+	3635048	chr25:2277008..2277023,+	XM_004948288	intronic	gga-mir-1752
chr26	-	696919	chr26	-	706628	chr26:696916..696927,-	NM_204727	intronic	gga-mir-6607
chr26	-	1644743	chr26	-	1655530	chr26:1644722..1644743,-	curation	intergenic	gga-let-7k,gga-let-7j
chr26	-	1765269	chr26	-	1776051	chr26:1765256..1765279,-	XM_015299105	intronic	gga-mir-6618
chr26	-	2139399	chr26	-	2139851	chr26:2139397..2139399,-	XR_001470248	intergenic	gga-mir-135a-3
chr26	-	2949967	chr26	-	2950321	chr26:2949958..2949977,-	XM_015299040	intronic	gga-mir-6654
chr26	+	3072473	chr26	+	3072828	chr26:3072466..3072481,+	curation	intergenic	gga-mir-205a
chr27	+	1679262	chr27	+	3911359	chr27:1679248..1679274,+	XM_015299301	intronic	gga-mir-6573
chr27	+	3765210	chr27	+	6173609	chr27:3765204..3765214,+	XR_001470337	intergenic	gga-mir-196-1
chr27	+	3831493	chr27	+	6239816	chr27:3831492..3831493,+	curation	intergenic	gga-mir-10a
chr27	+	4653446	chr27	+	7045552	chr27:4653423..4653451,+	NM_001044661	intronic	gga-mir-6547
chr27	-	5096720	chr27	-	7493276	chr27:5096718..5096746,-	NM_001267553	intronic	gga-novelmir-44
chr28	+	962037	chr28	+	1069468	chr28:962022..962041,+	NM_204104	intronic	gga-novelmir-45
chr28	+	1350334	chr28	+	1454385	chr28:1350327..1350340,+	XM_004948731	intronic	gga-mir-1774
chr28	+	1449676	chr28	+	1553508	chr28:1449670..1449686,+	NM_205368	intronic	gga-mir-1434
chr28	+	3617695	chr28	+	3702914	chr28:3617691..3617734,+	XR_001470437	intronic	gga-mir-9-1,gga-mir-1621,gga-mir-1565
chr28	+	4626124	chr28	+	4712063	chr28:4626108..4626130,+	XM_015300036	intronic	gga-mir-6666
chr28	-	4907216	chr28	-	4993151	chr28:4907215..4907225,-	XR_213737	intergenic	gga-mir-7-3
chr33	-	219645	chr33	-	5704872	chr33:219636..219667,-	XM_004949722	intronic	gga-mir-1668
chr33	+	1170873	chr33	+	7736118	chr33:1170866..1170879,+	XM_015300363	intronic	gga-mir-148b
chrW	-	3085742	chrW	-	4723680	chrW:3085735..3085760,-	NM_001031385	intronic	gga-mir-7b
chrZ	+	757827	chrZ	+	757760	chrZ:757824..757828,+	curation	intergenic	gga-mir-122-1
chrZ	-	10705069	chrZ	-	10705002	chrZ:10705053..10705099,-	XM_015277238	intronic	gga-mir-6613
chrZ	-	16705197	chrZ	-	16705130	chrZ:16705194..16705197,-	ENSGALT00000087559	intronic	gga-mir-449d,gga-mir-449b,gga-mir-449a,gga-mir-449c
chrZ	+	27481293	chrZ	+	27481226	chrZ:27481270..27481318,+	XM_424808	intronic	gga-mir-101-1
chrZ	+	34586297	chrZ	+	34597757	chrZ:34586276..34586320,+	XM_015280242	intronic	gga-mir-1556
chrZ	+	34882287	chrZ	+	34893747	chrZ:34882249..34882297,+	XM_003643015	intronic	gga-mir-1416
chrZ	-	35339328	chrZ	-	35350788	chrZ:35339326..35339346,-	XM_015280331	intronic	gga-mir-204-1
chrZ	-	40095690	chrZ	-	40107150	chrZ:40095674..40095699,-	XM_004949203	intronic	gga-mir-7-1
chrZ	+	41628274	chrZ	+	41639734	chrZ:41628270..41628276,+	XR_001464751	intronic	gga-mir-27b,gga-mir-24,gga-mir-23b
chrZ	-	44897622	chrZ	-	44909082	chrZ:44897617..44897646,-	XR_001464789	intronic	gga-mir-1456
chrZ	+	60463049	chrZ	+	60667436	chrZ:60463025..60463050,+	curation	intergenic	gga-mir-9-2
chrZ	-	61238693	chrZ	-	61443080	chrZ:61238673..61238704,-	XM_429181	intronic	gga-mir-3607
chrZ	-	62820381	chrZ	-	63024768	chrZ:62820371..62820387,-	XM_015280685	intronic	gga-mir-1756a
chrZ	+	70732038	chrZ	+	70936425	chrZ:70732028..70732044,+	NM_204853	intronic	gga-mir-2954,gga-mir-1583
chrZ	-	70771357	chrZ	-	70975744	chrZ:70771335..70771371,-	NM_001031440	intronic	gga-mir-2131
chrZ	+	70771427	chrZ	+	70975814	chrZ:70771414..70771446,+	XM_424952	intronic	gga-mir-7438
chrZ	-	78520059	chrZ	-	78739814	chrZ:78520050..78520078,-	curation	intergenic	gga-novelmir-52,gga-mir-31
