# Supplementary material for: Comparative transcriptomics of primary cells in vertebrates
Source: Genome Res. 2020 Jul;30(7):951–61. doi: 10.1101/gr.255679.119 (PMC7397866; doi:10.1101/gr.255679.119)
Supplement: Supplemental Material [file supp_gr.255679.119_Supplemental_Table_S13.xlsx]

## Sheet: README
Sheets TableS13a-TableS13x contain the differential miRNA expression analysis results between human and mouse, rat, dog, or chicken in each primary cell type in FANTOM5, with the miRNA expression level calculated from the CAGE expression level of the corresponding pri-miRNAs. For each miRNA, the CAGE expression level is shown in tags-per-million together with the log2 fold-change and the −log10 B…

## Sheet: TableS13a
Differential miRNA expression analysis, CAGE sequencing data, mouse vs human, Astrocyte - cerebellum
miRNA, human	miRNA, mouse	tpm, human, Astrocyte - cerebellum	tpm, mouse, Astrocyte - cerebellum	log2(foldchange)	-log10(pvalue)*sign
hsa-let-7a-5p	mmu-let-7a-5p	23.8054	34.0517	-1.06072	-1.00092
hsa-let-7b-5p	mmu-let-7b-5p	0.258493	10.2502	-5.77726	-5.37791
hsa-let-7c-5p	mmu-let-7c-5p	4.94198	14.4078	-2.1342	-2.59414
hsa-let-7d-5p	mmu-let-7d-5p	20.3664	32.7705	-1.21801	-1.13448
hsa-let-7f-5p	mmu-let-7f-5p	45.3293	43.9142	-0.52118	-0.43713
hsa-let-7g-5p	mmu-let-7g-5p	100.71	64.6434	0.0867706	0.0422732
hsa-let-7i-5p	mmu-let-7i-5p	22.7199	1.52314	3.60108	5.39062
hsa-miR-101-3p	mmu-miR-101a-3p	16.1382	1.765	2.99962	3.34647
hsa-miR-103a-3p	mmu-miR-103-3p	22.0263	42.8707	-1.55564	-2.46311
hsa-miR-1193-3p	mmu-miR-1193-3p	180.253	0	10.4959	9.18379
hsa-miR-1197	mmu-miR-1197-3p	180.253	0	10.4959	9.18379
hsa-miR-1249-3p	mmu-miR-1249-3p	11.8125	17.4301	-1.11793	-1.56132
hsa-miR-125b-5p	mmu-miR-125b-5p	48.0716	96.7093	-1.58834	-1.35331
hsa-miR-127-3p	mmu-miR-127-3p	180.253	0	10.4959	9.18379
hsa-miR-128-3p	mmu-miR-128-3p	12.9465	13.3924	-0.62477	-0.626464
hsa-miR-1306-5p	mmu-miR-1306-5p	11.8521	14.129	-0.84241	-0.869002
hsa-miR-134-5p	mmu-miR-134-5p	180.253	0	10.4959	9.18379
hsa-miR-136-3p	mmu-miR-136-3p	180.253	0	10.4959	9.18379
hsa-miR-138-5p	mmu-miR-138-5p	7.2935	0	5.97774	2.12913
hsa-miR-140-3p	mmu-miR-140-3p	16.6492	13.2335	-0.31335	-0.207281
hsa-miR-148b-3p	mmu-miR-148b-3p	343.304	199.566	0.20253	0.17111
hsa-miR-149-5p	mmu-miR-149-5p	46.4683	26.0483	0.290358	0.188429
hsa-miR-151a-5p	mmu-miR-151-5p	21.6421	12.1002	0.288183	0.188429
hsa-miR-152-3p	mmu-miR-152-3p	45.1708	143.995	-2.21752	-2.27871
hsa-miR-154-5p	mmu-miR-154-5p	180.253	0	10.4959	9.18379
hsa-miR-15b-5p	mmu-miR-15b-5p	15.0433	6.55029	0.505385	0.355741
hsa-miR-16-5p	mmu-miR-16-5p	19.7428	14.2619	-0.147837	-0.115222
hsa-miR-17-5p	mmu-miR-17-5p	15.4272	0.265849	4.81691	3.80121
hsa-miR-181a-5p	mmu-miR-181a-5p	14.6912	3.8918	1.24618	1.0286
hsa-miR-181b-5p	mmu-miR-181b-5p	14.6912	3.8918	1.24618	1.0286
hsa-miR-185-5p	mmu-miR-185-5p	8.21832	4.31456	0.281238	0.120719
hsa-miR-186-5p	mmu-miR-186-5p	23.3725	12.0022	0.317904	0.189249
hsa-miR-18a-5p	mmu-miR-18a-5p	15.4272	0.265849	4.81691	3.80121
hsa-miR-191-5p	mmu-miR-191-5p	9.28594	10.0083	-0.664019	-0.568146
hsa-miR-199a-3p	mmu-miR-199a-3p	0	6.74619	-7.87364	-1.00092
hsa-miR-19a-3p	mmu-miR-19a-3p	15.4272	0.265849	4.81691	3.80121
hsa-miR-19b-3p	mmu-miR-19b-3p	15.4272	0.398774	4.25694	3.84085
hsa-miR-20a-5p	mmu-miR-20a-5p	15.4272	0.265849	4.81691	3.80121
hsa-miR-21-5p	mmu-miR-21a-5p	65.2969	53.042	-0.315456	-0.187411
hsa-miR-214-3p	mmu-miR-214-3p	0	6.74619	-7.87364	-1.00092
hsa-miR-218-5p	mmu-miR-218-5p	33.7952	79.2472	-1.78719	-2.34525
hsa-miR-22-3p	mmu-miR-22-3p	14.9742	13.1875	-0.311098	-0.120719
hsa-miR-221-3p	mmu-miR-221-3p	29.6592	1.43819	3.57523	6.06968
hsa-miR-222-3p	mmu-miR-222-3p	29.6592	1.43819	3.57523	6.06968
hsa-miR-224-5p	mmu-miR-224-5p	11.2525	1.4142	2.39915	1.62313
hsa-miR-23a-3p	mmu-miR-23a-3p	9.8481	1.12436	2.7599	0.783517
hsa-miR-23b-3p	mmu-miR-23b-3p	29.1756	4.85925	2.12359	2.99667
hsa-miR-24-3p	mmu-miR-24-3p	39.0237	5.98362	2.26155	3.05383
hsa-miR-25-3p	mmu-miR-25-3p	121.651	27.6373	1.51909	0.953994
hsa-miR-26a-5p	mmu-miR-26a-5p	164.979	159.876	-0.499261	-0.409086
hsa-miR-26b-5p	mmu-miR-26b-5p	51.5998	42.7548	-0.258373	-0.161703
hsa-miR-27a-3p	mmu-miR-27a-3p	9.8481	1.12436	2.7599	0.783517
hsa-miR-27b-3p	mmu-miR-27b-3p	29.1756	4.85925	2.12359	2.99667
hsa-miR-28-3p	mmu-miR-28a-3p	20.3998	25.1308	-0.865872	-0.915378
hsa-miR-299-3p	mmu-miR-299a-3p	180.253	0	10.4959	9.18379
hsa-miR-301a-3p	mmu-miR-301a-3p	40.7188	2.93734	3.27575	5.54691
hsa-miR-3064-5p	mmu-miR-3064-5p	262.792	336.222	-0.962608	-1.14951
hsa-miR-30a-5p	mmu-miR-30a-5p	14.5412	2.76743	1.61742	1.43772
hsa-miR-30c-5p	mmu-miR-30c-5p	39.0334	8.50918	1.62188	2.51432
hsa-miR-30e-5p	mmu-miR-30e-5p	24.4922	5.74175	1.62185	2.28176
hsa-miR-31-5p	mmu-miR-31-5p	12.494	2.2967	2.00459	1.77573
hsa-miR-32-5p	mmu-miR-32-5p	16.6753	29.3804	-1.43203	-1.67375
hsa-miR-323a-3p	mmu-miR-323-3p	180.253	0	10.4959	9.18379
hsa-miR-324-3p	mmu-miR-324-3p	21.1783	39.0569	-1.43927	-1.75978
hsa-miR-329-3p	mmu-miR-329-3p	360.506	0	11.4955	9.18379
hsa-miR-330-5p	mmu-miR-330-5p	14.0675	21.7427	-1.23004	-1.56132
hsa-miR-335-3p	mmu-miR-335-3p	417.552	970.958	-1.68743	-0.462173
hsa-miR-339-3p	mmu-miR-339-3p	82.8073	4.2426	3.77172	7.94965
hsa-miR-33a-5p	mmu-miR-33-5p	253.226	124.171	0.468334	0.457709
hsa-miR-340-5p	mmu-miR-340-5p	45.3417	15.7001	0.963908	0.851474
hsa-miR-365a-3p,hsa-miR-365b-3p	mmu-miR-365-3p	7.18436	0.507713	3.48653	1.26721
hsa-miR-369-3p	mmu-miR-369-3p	180.253	0	10.4959	9.18379
hsa-miR-370-3p	mmu-miR-370-3p	180.253	0	10.4959	9.18379
hsa-miR-376a-5p	mmu-miR-376a-5p	180.253	0	10.4959	9.18379
hsa-miR-376c-3p	mmu-miR-376c-3p	180.253	0	10.4959	9.18379
hsa-miR-377-5p	mmu-miR-377-5p	180.253	0	10.4959	9.18379
hsa-miR-379-3p	mmu-miR-379-3p	180.253	0	10.4959	9.18379
hsa-miR-381-3p	mmu-miR-381-3p	180.253	0	10.4959	9.18379
hsa-miR-382-5p	mmu-miR-382-5p	180.253	0	10.4959	9.18379
hsa-miR-409-3p	mmu-miR-409-3p	180.253	0	10.4959	9.18379
hsa-miR-410-3p	mmu-miR-410-3p	180.253	0	10.4959	9.18379
hsa-miR-411-5p	mmu-miR-411-5p	180.253	0	10.4959	9.18379
hsa-miR-412-5p	mmu-miR-412-5p	180.253	0	10.4959	9.18379
hsa-miR-423-3p	mmu-miR-423-3p	41.1272	8.59414	1.7139	2.68947
hsa-miR-424-5p	mmu-miR-322-5p	4.37428	60.5288	-4.32538	-3.9417
hsa-miR-425-5p	mmu-miR-425-5p	9.28594	10.0083	-0.664019	-0.568146
hsa-miR-431-5p	mmu-miR-431-5p	180.253	0	10.4959	9.18379
hsa-miR-432-5p	mmu-miR-432	180.253	0	10.4959	9.18379
hsa-miR-433-3p	mmu-miR-433-3p	180.253	0	10.4959	9.18379
hsa-miR-450a-5p	mmu-miR-450a-5p	8.74856	121.058	-4.32131	-6.39417
hsa-miR-455-5p	mmu-miR-455-5p	13.1308	0.507713	4.4124	3.21345
hsa-miR-483-3p	mmu-miR-483-3p	59.3149	363.943	-3.12816	-0.69455
hsa-miR-485-3p	mmu-miR-485-3p	180.253	0	10.4959	9.18379
hsa-miR-487b-3p	mmu-miR-487b-3p	180.253	0	10.4959	9.18379
hsa-miR-488-5p	mmu-miR-488-5p	1.21999	8.19336	-3.3621	-1.75978
hsa-miR-493-5p	mmu-miR-493-5p	180.253	0	10.4959	9.18379
hsa-miR-494-3p	mmu-miR-494-3p	180.253	0	10.4959	9.18379
hsa-miR-495-3p	mmu-miR-495-3p	180.253	0	10.4959	9.18379
hsa-miR-496	mmu-miR-496a-3p	180.253	0	10.4959	9.18379
hsa-miR-503-5p	mmu-miR-503-5p	4.37428	60.5288	-4.32538	-3.9417
hsa-miR-504-5p	mmu-miR-504-5p	3.03304	5.58284	-1.45475	-0.418536
hsa-miR-542-3p	mmu-miR-542-3p	4.37428	60.5288	-4.32538	-3.9417
hsa-miR-543	mmu-miR-543-3p	180.253	0	10.4959	9.18379
hsa-miR-544a-5p	mmu-miR-544-5p	180.253	0	10.4959	9.18379
hsa-miR-654-3p	mmu-miR-654-3p	180.253	0	10.4959	9.18379
hsa-miR-665	mmu-miR-665-3p	180.253	0	10.4959	9.18379
hsa-miR-668-3p	mmu-miR-668-3p	180.253	0	10.4959	9.18379
hsa-miR-671-3p	mmu-miR-671-3p	65.9933	76.2379	-0.761754	-0.507758
hsa-miR-7-5p	mmu-miR-7a-5p	161.498	129.103	-0.245099	-0.17111
hsa-miR-708-5p	mmu-miR-708-5p	20.7988	0.265849	5.23244	4.70974
hsa-miR-744-5p	mmu-miR-744-5p	10.8807	12.4989	-0.726036	-0.69455
hsa-miR-758-3p	mmu-miR-758-3p	180.253	0	10.4959	9.18379
hsa-miR-767-5p	mmu-miR-767	5.09492	3.66293	-0.141544	-0.0375854
hsa-miR-877-5p	mmu-miR-877-5p	76.165	69.8105	-0.442244	-0.262027
hsa-miR-9-5p	mmu-miR-9-5p	33.0663	63.599	-1.4639	-0.358814
hsa-miR-92a-3p	mmu-miR-92a-3p	15.4272	0.398774	4.25694	3.84085
hsa-miR-93-5p	mmu-miR-93-5p	121.651	27.6373	1.51909	0.953994
hsa-miR-98-5p	mmu-miR-98-5p	24.9628	11.1437	0.535066	0.473707

## Sheet: TableS13b
Differential miRNA expression analysis, CAGE sequencing data, mouse vs human, CD19+ B Cells
miRNA, human	miRNA, mouse	tpm, human, CD19+ B Cells	tpm, mouse, CD19+ B Cells	log2(foldchange)	-log10(pvalue)*sign
hsa-let-7a-5p	mmu-let-7a-5p	8.13932	11.6156	-0.414683	-0.193614
hsa-let-7d-5p	mmu-let-7d-5p	8.13932	11.6156	-0.414683	-0.193614
hsa-let-7f-5p	mmu-let-7f-5p	23.9101	99.5334	-1.96151	-5.10442
hsa-let-7g-5p	mmu-let-7g-5p	115.461	90.5214	0.442841	0.807054
hsa-miR-101-3p	mmu-miR-101a-3p	30.121	4.60618	2.80215	5.10442
hsa-miR-103a-3p	mmu-miR-103-3p	29.319	57.4771	-0.882096	-1.15231
hsa-miR-1249-3p	mmu-miR-1249-3p	9.73864	42.2566	-2.01602	-2.56824
hsa-miR-128-3p	mmu-miR-128-3p	13.9391	37.0497	-1.32106	-1.26583
hsa-miR-1306-5p	mmu-miR-1306-5p	3.60867	19.426	-2.3213	-1.62158
hsa-miR-132-3p	mmu-miR-132-3p	0.689005	16.6223	-4.47548	-2.56824
hsa-miR-139-5p	mmu-miR-139-5p	0	37.2499	-8.74594	-7.18097
hsa-miR-140-3p	mmu-miR-140-3p	25.8938	39.4529	-0.511773	-0.422741
hsa-miR-142-5p	mmu-miR-142a-5p	64.3312	290.99	-2.07866	-11.277
hsa-miR-148b-3p	mmu-miR-148b-3p	36.2044	146.597	-1.92413	-6.82432
hsa-miR-150-5p	mmu-miR-150-5p	17.3415	0.400537	5.54091	4.42388
hsa-miR-151a-5p	mmu-miR-151-5p	13.8185	2.20295	2.74452	2.56824
hsa-miR-155-5p	mmu-miR-155-5p	13.8395	14.4193	0.0251941	0.00561662
hsa-miR-15a-5p	mmu-miR-15a-5p	15.9921	33.2446	-0.959158	-0.886177
hsa-miR-15b-5p	mmu-miR-15b-5p	13.5978	32.043	-1.14709	-1.07384
hsa-miR-16-5p	mmu-miR-16-5p	29.5899	65.2875	-1.04836	-1.63319
hsa-miR-181a-5p	mmu-miR-181a-5p	10.4247	6.40859	0.798306	0.402104
hsa-miR-181b-5p	mmu-miR-181b-5p	10.4247	6.40859	0.798306	0.402104
hsa-miR-186-5p	mmu-miR-186-5p	122.224	52.6706	1.3061	4.65932
hsa-miR-204-5p	mmu-miR-204-5p	0	34.6464	-8.64141	-6.9681
hsa-miR-21-5p	mmu-miR-21a-5p	8.30998	24.4328	-1.47065	-1.15231
hsa-miR-212-5p	mmu-miR-212-5p	0.689005	16.6223	-4.47548	-2.56824
hsa-miR-22-3p	mmu-miR-22-3p	4.20799	23.2311	-2.37092	-1.96936
hsa-miR-221-3p	mmu-miR-221-3p	17.076	1.00134	4.1787	4.32811
hsa-miR-222-3p	mmu-miR-222-3p	17.076	1.00134	4.1787	4.32811
hsa-miR-23a-3p	mmu-miR-23a-3p	51.0596	14.0188	1.96021	4.11402
hsa-miR-24-3p	mmu-miR-24-3p	51.3467	20.4274	1.42517	2.45507
hsa-miR-25-3p	mmu-miR-25-3p	12.271	21.629	-0.733162	-0.422741
hsa-miR-26a-5p	mmu-miR-26a-5p	40.9074	37.6505	0.218474	0.193614
hsa-miR-26b-5p	mmu-miR-26b-5p	23.991	17.4234	0.559492	0.422741
hsa-miR-27a-3p	mmu-miR-27a-3p	51.0596	14.0188	1.96021	4.11402
hsa-miR-28-3p	mmu-miR-28a-3p	14.6694	8.21101	0.930185	0.592655
hsa-miR-29a-3p	mmu-miR-29a-3p	1.55099	16.422	-3.3627	-1.66534
hsa-miR-29b-3p	mmu-miR-29b-3p	4.23071	24.0322	-2.43315	-1.96936
hsa-miR-3064-5p	mmu-miR-3064-5p	2652.83	2471.51	0.195992	0.520877
hsa-miR-30c-5p	mmu-miR-30c-5p	15.5588	6.00805	1.46709	1.17168
hsa-miR-30e-5p	mmu-miR-30e-5p	14.9135	5.60752	1.50401	1.18
hsa-miR-32-5p	mmu-miR-32-5p	13.1382	20.4274	-0.531601	-0.306912
hsa-miR-324-3p	mmu-miR-324-3p	8.79746	34.8467	-1.90409	-1.96936
hsa-miR-330-5p	mmu-miR-330-5p	10.7497	8.21101	0.49154	0.219825
hsa-miR-339-3p	mmu-miR-339-3p	42.4357	9.21235	2.29369	4.92915
hsa-miR-33a-5p	mmu-miR-33-5p	117.854	139.787	-0.158629	-0.193614
hsa-miR-340-5p	mmu-miR-340-5p	11.0008	45.8615	-1.97454	-2.60588
hsa-miR-342-3p	mmu-miR-342-3p	176.632	158.012	0.261286	0.391083
hsa-miR-361-5p	mmu-miR-361-5p	15.3369	31.2419	-0.93482	-0.821579
hsa-miR-378a-3p	mmu-miR-378a-3p	8.77242	7.81047	0.254821	0.103287
hsa-miR-423-3p	mmu-miR-423-3p	42.2697	23.8319	0.918171	1.25132
hsa-miR-505-3p	mmu-miR-505-3p	13.9938	9.61289	0.638682	0.377734
hsa-miR-652-3p	mmu-miR-652-3p	0.34421	10.0134	-4.59734	-1.62158
hsa-miR-671-3p	mmu-miR-671-3p	27.3854	29.2392	0.00185531	0.00135564
hsa-miR-7-5p	mmu-miR-7a-5p	241.845	415.557	-0.686316	-2.78075
hsa-miR-744-5p	mmu-miR-744-5p	52.5466	24.4328	1.19708	2.04294
hsa-miR-877-5p	mmu-miR-877-5p	106.586	86.9165	0.389324	0.592655
hsa-miR-93-5p	mmu-miR-93-5p	12.271	21.629	-0.733162	-0.422741
hsa-miR-98-5p	mmu-miR-98-5p	15.7708	87.9179	-2.38398	-5.85422

## Sheet: TableS13c
Differential miRNA expression analysis, CAGE sequencing data, mouse vs human, CD4+ T Cells
miRNA, human	miRNA, mouse	tpm, human, CD4+ T Cells	tpm, mouse, CD4+ T Cells	log2(foldchange)	-log10(pvalue)*sign
hsa-let-7f-5p	mmu-let-7f-5p	20.3154	105.301	-1.5774	-1.09482
hsa-let-7g-5p	mmu-let-7g-5p	114.435	114.873	0.781663	0.785603
hsa-miR-101-3p	mmu-miR-101a-3p	34.617	1.7405	5.12246	3.4162
hsa-miR-103a-3p	mmu-miR-103-3p	29.1703	64.3987	-0.336527	-0.133834
hsa-miR-1249-3p	mmu-miR-1249-3p	2.61311	13.0538	-1.43913	-0.193029
hsa-miR-128-3p	mmu-miR-128-3p	16.0919	59.1772	-1.10938	-0.460303
hsa-miR-1306-5p	mmu-miR-1306-5p	3.72789	20.0158	-1.63783	-0.31947
hsa-miR-132-3p	mmu-miR-132-3p	0.290767	26.9778	-5.69612	-1.09535
hsa-miR-139-5p	mmu-miR-139-5p	0	54.8259	-9.70777	-4.68906
hsa-miR-140-3p	mmu-miR-140-3p	23.3073	39.1614	0.0241588	0.01005
hsa-miR-142-5p	mmu-miR-142a-5p	45.4858	352.452	-2.08855	-3.28697
hsa-miR-148b-3p	mmu-miR-148b-3p	33.4832	129.668	-1.17516	-0.713122
hsa-miR-150-5p	mmu-miR-150-5p	29.3925	0	8.30112	2.64086
hsa-miR-151a-5p	mmu-miR-151-5p	5.82459	5.22151	0.879421	0.133834
hsa-miR-155-5p	mmu-miR-155-5p	8.73926	17.405	-0.182791	-0.0388295
hsa-miR-15a-5p	mmu-miR-15a-5p	8.94734	26.9778	-0.817092	-0.179896
hsa-miR-15b-5p	mmu-miR-15b-5p	14.0282	74.8417	-1.60039	-0.785603
hsa-miR-16-5p	mmu-miR-16-5p	22.9755	101.82	-1.34802	-0.756355
hsa-miR-181a-5p	mmu-miR-181a-5p	10.6965	45.2531	-1.28993	-0.460303
hsa-miR-181b-5p	mmu-miR-181b-5p	10.6965	45.2531	-1.28993	-0.460303
hsa-miR-186-5p	mmu-miR-186-5p	127.805	43.5126	2.29608	3.4162
hsa-miR-204-5p	mmu-miR-204-5p	0	39.1614	-9.22234	-3.33845
hsa-miR-21-5p	mmu-miR-21a-5p	44.3962	31.3291	1.32265	0.473602
hsa-miR-212-5p	mmu-miR-212-5p	0.290767	26.9778	-5.69612	-1.09535
hsa-miR-22-3p	mmu-miR-22-3p	8.27038	20.0158	-0.411638	-0.0772455
hsa-miR-23a-3p	mmu-miR-23a-3p	56.0992	4.35126	4.53734	4.84031
hsa-miR-23b-3p	mmu-miR-23b-3p	0.123698	71.3607	-8.31559	-4.91125
hsa-miR-24-3p	mmu-miR-24-3p	56.2229	75.712	0.418999	0.179896
hsa-miR-25-3p	mmu-miR-25-3p	4.38775	18.2753	-1.24247	-0.212213
hsa-miR-26a-5p	mmu-miR-26a-5p	65.1475	105.301	0.0821495	0.0388295
hsa-miR-26b-5p	mmu-miR-26b-5p	14.7521	16.5348	0.663625	0.179896
hsa-miR-27a-3p	mmu-miR-27a-3p	56.0992	4.35126	4.53734	4.84031
hsa-miR-27b-3p	mmu-miR-27b-3p	0.123698	71.3607	-8.31559	-4.91125
hsa-miR-28-3p	mmu-miR-28a-3p	14.0863	12.1835	0.972143	0.212213
hsa-miR-301a-3p	mmu-miR-301a-3p	8.58584	1.7405	3.04944	0.699423
hsa-miR-3064-5p	mmu-miR-3064-5p	2015.24	3731.64	-0.100498	-0.179896
hsa-miR-30c-5p	mmu-miR-30c-5p	13.595	5.22151	2.17451	0.699423
hsa-miR-30e-5p	mmu-miR-30e-5p	13.595	3.48101	2.75946	0.933893
hsa-miR-32-5p	mmu-miR-32-5p	27.7845	22.6266	1.09403	0.473602
hsa-miR-324-3p	mmu-miR-324-3p	11.537	22.6266	-0.166101	-0.0388295
hsa-miR-326	mmu-miR-326-3p	1.22909	19.1456	-3.2394	-0.653931
hsa-miR-330-5p	mmu-miR-330-5p	11.9186	6.96202	1.61029	0.455642
hsa-miR-339-3p	mmu-miR-339-3p	12.5648	12.1835	0.826218	0.179896
hsa-miR-33a-5p	mmu-miR-33-5p	46.7497	147.943	-0.866623	-0.670252
hsa-miR-340-5p	mmu-miR-340-5p	8.60152	16.5348	-0.134698	-0.0309809
hsa-miR-342-3p	mmu-miR-342-3p	409.82	216.693	1.67521	4.91125
hsa-miR-361-5p	mmu-miR-361-5p	8.9276	26.1076	-0.801028	-0.179896
hsa-miR-374b-5p	mmu-miR-374b-5p	7.63861	2.61076	2.31881	0.473602
hsa-miR-378a-3p	mmu-miR-378a-3p	3.90383	13.924	-1.08394	-0.179896
hsa-miR-421	mmu-miR-421-3p	7.63861	2.61076	2.31881	0.473602
hsa-miR-423-3p	mmu-miR-423-3p	32.8053	13.0538	2.10401	1.23476
hsa-miR-491-5p	mmu-miR-491-5p	2.27706	12.1835	-1.73793	-0.212213
hsa-miR-505-3p	mmu-miR-505-3p	15.2	17.405	0.601892	0.162941
hsa-miR-652-3p	mmu-miR-652-3p	0.254045	19.1456	-5.34889	-0.957516
hsa-miR-671-3p	mmu-miR-671-3p	21.1328	29.5886	0.329688	0.105414
hsa-miR-7-5p	mmu-miR-7a-5p	196.171	382.911	-0.151646	-0.133834
hsa-miR-744-5p	mmu-miR-744-5p	41.1513	17.405	2.04364	1.64071
hsa-miR-877-5p	mmu-miR-877-5p	69.7203	105.301	0.194543	0.105414
hsa-miR-92b-3p	mmu-miR-92b-3p	12.0152	0	7.0473	1.78814
hsa-miR-93-5p	mmu-miR-93-5p	4.38775	18.2753	-1.24247	-0.212213
hsa-miR-98-5p	mmu-miR-98-5p	14.0176	96.598	-1.99725	-1.35288

## Sheet: TableS13d
Differential miRNA expression analysis, CAGE sequencing data, mouse vs human, CD8+ T Cells
miRNA, human	miRNA, mouse	tpm, human, CD8+ T Cells	tpm, mouse, CD8+ T Cells	log2(foldchange)	-log10(pvalue)*sign
hsa-let-7f-5p	mmu-let-7f-5p	22.3852	124.043	-1.90608	-6.67322
hsa-let-7g-5p	mmu-let-7g-5p	104.688	108.744	0.508516	0.822699
hsa-miR-101-3p	mmu-miR-101a-3p	34.1985	3.3078	3.94799	8.90664
hsa-miR-103a-3p	mmu-miR-103-3p	39.0869	63.6752	-0.12929	-0.1344
hsa-miR-128-3p	mmu-miR-128-3p	14.776	60.3674	-1.48373	-3.24014
hsa-miR-1306-5p	mmu-miR-1306-5p	4.01205	19.8468	-1.73104	-2.88874
hsa-miR-132-3p	mmu-miR-132-3p	0.0643659	10.3369	-6.83319	-5.5268
hsa-miR-139-5p	mmu-miR-139-5p	0	145.543	-11.6106	-18.8108
hsa-miR-140-3p	mmu-miR-140-3p	24.1838	27.2894	0.391432	0.450971
hsa-miR-142-5p	mmu-miR-142a-5p	118.625	322.924	-0.826988	-0.606901
hsa-miR-148b-3p	mmu-miR-148b-3p	35.1999	188.958	-1.87204	-6.44848
hsa-miR-150-5p	mmu-miR-150-5p	27.1706	1.24043	5.01101	6.73161
hsa-miR-155-5p	mmu-miR-155-5p	7.47286	13.2312	-0.271881	-0.178407
hsa-miR-15a-5p	mmu-miR-15a-5p	6.29097	31.8376	-1.76557	-3.45667
hsa-miR-15b-5p	mmu-miR-15b-5p	13.604	92.205	-2.17426	-6.36726
hsa-miR-16-5p	mmu-miR-16-5p	19.895	124.043	-2.0514	-6.12683
hsa-miR-181a-5p	mmu-miR-181a-5p	8.36404	31.8376	-1.35902	-2.31489
hsa-miR-181b-5p	mmu-miR-181b-5p	8.36404	31.8376	-1.35902	-2.31489
hsa-miR-186-5p	mmu-miR-186-5p	130.964	47.1362	2.02292	6.67322
hsa-miR-204-5p	mmu-miR-204-5p	0	44.6554	-9.90602	-13.0723
hsa-miR-21-5p	mmu-miR-21a-5p	37.5601	27.2894	1.07983	0.804313
hsa-miR-212-5p	mmu-miR-212-5p	0.0643659	10.3369	-6.83319	-5.5268
hsa-miR-22-3p	mmu-miR-22-3p	13.3135	11.1638	0.83675	0.949386
hsa-miR-221-3p	mmu-miR-221-3p	11.4421	0	7.79377	3.33898
hsa-miR-222-3p	mmu-miR-222-3p	11.4421	0	7.79377	3.33898
hsa-miR-23a-3p	mmu-miR-23a-3p	137.818	5.37518	5.26763	21.1932
hsa-miR-23b-3p	mmu-miR-23b-3p	0.0428451	56.6461	-9.28737	-11.7853
hsa-miR-24-3p	mmu-miR-24-3p	137.86	62.0213	1.73967	5.23669
hsa-miR-25-3p	mmu-miR-25-3p	7.00697	20.6738	-0.978748	-1.19412
hsa-miR-26a-5p	mmu-miR-26a-5p	54.9277	79.8008	0.0126156	0.0123681
hsa-miR-26b-5p	mmu-miR-26b-5p	22.3684	28.5298	0.207176	0.182305
hsa-miR-27a-3p	mmu-miR-27a-3p	137.818	5.37518	5.26763	21.1932
hsa-miR-27b-3p	mmu-miR-27b-3p	0.0428451	56.6461	-9.28737	-11.7853
hsa-miR-28-3p	mmu-miR-28a-3p	10.8694	8.68299	0.883532	0.961472
hsa-miR-29b-3p	mmu-miR-29b-3p	7.13612	12.4043	-0.221569	-0.155102
hsa-miR-301a-3p	mmu-miR-301a-3p	7.06755	1.24043	3.05408	2.52333
hsa-miR-3064-5p	mmu-miR-3064-5p	2002.51	3464.51	-0.21857	-0.275443
hsa-miR-30c-5p	mmu-miR-30c-5p	9.88553	5.78866	1.34362	1.58837
hsa-miR-30e-5p	mmu-miR-30e-5p	9.88553	3.72128	1.98108	2.46423
hsa-miR-32-5p	mmu-miR-32-5p	23.7391	26.4624	0.41397	0.470093
hsa-miR-324-3p	mmu-miR-324-3p	9.16395	23.5681	-0.803159	-1.02445
hsa-miR-326	mmu-miR-326-3p	1.16497	10.7504	-2.64485	-3.40451
hsa-miR-330-5p	mmu-miR-330-5p	9.69522	5.37518	1.42862	1.67928
hsa-miR-331-3p	mmu-miR-331-3p	1.66516	11.9908	-2.27006	-3.01568
hsa-miR-339-3p	mmu-miR-339-3p	16.6956	13.6447	0.875842	1.09641
hsa-miR-33a-5p	mmu-miR-33-5p	56.4025	145.543	-0.807642	-1.40318
hsa-miR-340-5p	mmu-miR-340-5p	12.4632	13.2312	0.471606	0.450971
hsa-miR-342-3p	mmu-miR-342-3p	364.33	281.577	0.916736	1.82172
hsa-miR-361-5p	mmu-miR-361-5p	10.2936	33.4915	-1.15994	-1.7727
hsa-miR-374b-5p	mmu-miR-374b-5p	8.09882	3.72128	1.67561	1.75113
hsa-miR-378a-3p	mmu-miR-378a-3p	5.24937	28.5298	-1.87379	-3.24353
hsa-miR-421	mmu-miR-421-3p	8.09882	3.72128	1.67561	1.75113
hsa-miR-423-3p	mmu-miR-423-3p	32.4917	15.2986	1.64835	3.61597
hsa-miR-491-5p	mmu-miR-491-5p	2.60415	16.1255	-2.05865	-3.08996
hsa-miR-504-5p	mmu-miR-504-5p	0	14.0582	-8.23859	-8.1214
hsa-miR-505-3p	mmu-miR-505-3p	14.279	8.26951	1.34557	1.85616
hsa-miR-652-3p	mmu-miR-652-3p	0.280183	14.8851	-5.18657	-7.35451
hsa-miR-671-3p	mmu-miR-671-3p	23.4726	26.049	0.41923	0.470093
hsa-miR-7-5p	mmu-miR-7a-5p	177.045	398.59	-0.588014	-1.01876
hsa-miR-744-5p	mmu-miR-744-5p	47.6286	21.0873	1.75177	4.63846
hsa-miR-877-5p	mmu-miR-877-5p	75.5526	121.562	-0.116764	-0.1344
hsa-miR-92b-3p	mmu-miR-92b-3p	20.6987	0	8.64297	4.00875
hsa-miR-93-5p	mmu-miR-93-5p	7.00697	20.6738	-0.978748	-1.19412
hsa-miR-98-5p	mmu-miR-98-5p	14.6638	114.533	-2.40099	-9.64417

## Sheet: TableS13e
Differential miRNA expression analysis, CAGE sequencing data, mouse vs human, Cardiac Myocytes
miRNA, human	miRNA, mouse	tpm, human, Cardiac Myocytes	tpm, mouse, Cardiac Myocytes	log2(foldchange)	-log10(pvalue)*sign
hsa-let-7a-5p	mmu-let-7a-5p	7.05976	10.9091	-1.21571	-0.838349
hsa-let-7b-5p	mmu-let-7b-5p	0	7.6123	-6.70896	-3.71066
hsa-let-7c-5p	mmu-let-7c-5p	5.0302	17.1136	-2.39125	-2.06464
hsa-let-7f-5p	mmu-let-7f-5p	21.023	43.7132	-1.5845	-2.91967
hsa-let-7g-5p	mmu-let-7g-5p	60.9829	61.782	-0.553411	-0.72555
hsa-miR-101-3p	mmu-miR-101a-3p	9.85155	0.763229	3.23198	2.3062
hsa-miR-103a-3p	mmu-miR-103-3p	28.0654	46.7908	-1.2911	-2.06464
hsa-miR-1193-3p	mmu-miR-1193-3p	34.927	1.24597	4.52842	3.71066
hsa-miR-1197	mmu-miR-1197-3p	34.927	1.24597	4.52842	3.71066
hsa-miR-1249-3p	mmu-miR-1249-3p	5.88745	25.1419	-2.55606	-2.94424
hsa-miR-125b-5p	mmu-miR-125b-5p	47.6195	31.443	0.032257	0.0159548
hsa-miR-126-5p	mmu-miR-126a-5p	18.7779	12.8027	-0.0117155	-0.00384926
hsa-miR-127-3p	mmu-miR-127-3p	34.927	1.24597	4.52842	3.71066
hsa-miR-128-3p	mmu-miR-128-3p	16.0475	16.7594	-0.585336	-0.38371
hsa-miR-1306-5p	mmu-miR-1306-5p	4.11073	16.7634	-2.55424	-3.40842
hsa-miR-134-5p	mmu-miR-134-5p	34.927	1.24597	4.52842	3.71066
hsa-miR-136-3p	mmu-miR-136-3p	34.927	1.24597	4.52842	3.71066
hsa-miR-139-5p	mmu-miR-139-5p	0.920411	13.964	-4.27291	-3.80273
hsa-miR-140-3p	mmu-miR-140-3p	6.58429	11.4069	-1.30479	-0.931645
hsa-miR-143-3p	mmu-miR-143-3p	4.61676	15.6222	-2.36536	-2.16688
hsa-miR-145-5p	mmu-miR-145a-5p	4.61676	15.6222	-2.36536	-2.16688
hsa-miR-148b-3p	mmu-miR-148b-3p	200.058	160.102	-0.301248	-0.190845
hsa-miR-149-5p	mmu-miR-149-5p	106.986	4.54865	4.03663	9.38008
hsa-miR-151a-5p	mmu-miR-151-5p	13.7391	22.9135	-1.25662	-1.53317
hsa-miR-152-3p	mmu-miR-152-3p	52.7424	138.629	-1.93161	-3.80273
hsa-miR-153-3p	mmu-miR-153-3p	8.06869	0	6.28315	1.93057
hsa-miR-154-5p	mmu-miR-154-5p	34.927	1.24597	4.52842	3.71066
hsa-miR-15a-5p	mmu-miR-15a-5p	5.2303	9.60283	-1.34063	-0.574729
hsa-miR-15b-5p	mmu-miR-15b-5p	22.5098	9.38042	0.679212	0.352868
hsa-miR-16-5p	mmu-miR-16-5p	27.7401	18.9832	0.0269524	0.0134165
hsa-miR-185-5p	mmu-miR-185-5p	4.86717	7.90235	-1.19951	-0.739198
hsa-miR-186-5p	mmu-miR-186-5p	72.9884	44.6619	0.224155	0.141457
hsa-miR-188-5p	mmu-miR-188-5p	6.18333	25.8161	-2.64993	-3.65268
hsa-miR-21-5p	mmu-miR-21a-5p	74.0377	154.004	-1.46667	-1.04892
hsa-miR-218-5p	mmu-miR-218-5p	50.9669	90.5609	-1.26831	-1.13011
hsa-miR-22-3p	mmu-miR-22-3p	13.0536	46.77	-2.34138	-2.44199
hsa-miR-223-3p	mmu-miR-223-3p	0	8.21633	-6.69353	-3.29172
hsa-miR-224-5p	mmu-miR-224-5p	7.10988	8.9478	-0.839791	-0.352868
hsa-miR-23b-3p	mmu-miR-23b-3p	13.119	62.7873	-2.7804	-3.65268
hsa-miR-24-3p	mmu-miR-24-3p	19.0046	67.0324	-2.34869	-3.65268
hsa-miR-25-3p	mmu-miR-25-3p	21.9384	6.35873	1.17429	0.632107
hsa-miR-26a-5p	mmu-miR-26a-5p	118.28	217.536	-1.37944	-3.29172
hsa-miR-26b-5p	mmu-miR-26b-5p	25.1007	25.3747	-0.561562	-0.477589
hsa-miR-27b-3p	mmu-miR-27b-3p	13.119	62.7873	-2.7804	-3.65268
hsa-miR-28-3p	mmu-miR-28a-3p	17.6169	43.7083	-1.84303	-2.81988
hsa-miR-299-3p	mmu-miR-299a-3p	34.927	1.24597	4.52842	3.71066
hsa-miR-301a-3p	mmu-miR-301a-3p	39.9437	3.09297	3.0716	3.71066
hsa-miR-3064-5p	mmu-miR-3064-5p	557.566	848.516	-1.07261	-1.61368
hsa-miR-30c-5p	mmu-miR-30c-5p	14.2945	9.04181	0.118996	0.0412072
hsa-miR-30e-5p	mmu-miR-30e-5p	12.4036	5.7634	0.537315	0.211226
hsa-miR-32-5p	mmu-miR-32-5p	21.8644	16.2228	-0.0736504	-0.0304346
hsa-miR-323a-3p	mmu-miR-323-3p	34.927	1.24597	4.52842	3.71066
hsa-miR-324-3p	mmu-miR-324-3p	6.16656	15.612	-1.82066	-1.96258
hsa-miR-326	mmu-miR-326-3p	8.12365	11.5877	-1.05531	-0.639267
hsa-miR-329-3p	mmu-miR-329-3p	69.854	1.24597	5.54307	4.75329
hsa-miR-330-5p	mmu-miR-330-5p	10.6141	14.7107	-0.994354	-0.715105
hsa-miR-331-3p	mmu-miR-331-3p	0.494113	10.9079	-6.10982	-3.71066
hsa-miR-335-3p	mmu-miR-335-3p	97.9097	66.0039	-0.0839123	-0.0197359
hsa-miR-339-3p	mmu-miR-339-3p	42.3435	0.962015	4.94518	7.61319
hsa-miR-33a-5p	mmu-miR-33-5p	89.2909	63.0433	-0.0932718	-0.0412072
hsa-miR-340-5p	mmu-miR-340-5p	15.2754	24.6368	-1.24001	-1.02829
hsa-miR-361-5p	mmu-miR-361-5p	8.54546	21.4875	-1.83331	-1.69364
hsa-miR-362-5p	mmu-miR-362-5p	6.18333	25.8161	-2.64993	-3.65268
hsa-miR-369-3p	mmu-miR-369-3p	34.927	1.24597	4.52842	3.71066
hsa-miR-370-3p	mmu-miR-370-3p	34.927	1.24597	4.52842	3.71066
hsa-miR-376a-5p	mmu-miR-376a-5p	34.927	1.24597	4.52842	3.71066
hsa-miR-376c-3p	mmu-miR-376c-3p	34.927	1.24597	4.52842	3.71066
hsa-miR-377-5p	mmu-miR-377-5p	34.927	1.24597	4.52842	3.71066
hsa-miR-379-3p	mmu-miR-379-3p	34.927	1.24597	4.52842	3.71066
hsa-miR-381-3p	mmu-miR-381-3p	34.927	1.24597	4.52842	3.71066
hsa-miR-382-5p	mmu-miR-382-5p	34.927	1.24597	4.52842	3.71066
hsa-miR-409-3p	mmu-miR-409-3p	34.927	1.24597	4.52842	3.71066
hsa-miR-410-3p	mmu-miR-410-3p	34.927	1.24597	4.52842	3.71066
hsa-miR-411-5p	mmu-miR-411-5p	34.927	1.24597	4.52842	3.71066
hsa-miR-412-5p	mmu-miR-412-5p	34.927	1.24597	4.52842	3.71066
hsa-miR-423-3p	mmu-miR-423-3p	17.6092	11.7407	0.0603449	0.0197359
hsa-miR-424-5p	mmu-miR-322-5p	8.01743	92.9622	-4.07972	-3.91397
hsa-miR-431-5p	mmu-miR-431-5p	34.927	1.24597	4.52842	3.71066
hsa-miR-432-5p	mmu-miR-432	34.927	1.24597	4.52842	3.71066
hsa-miR-433-3p	mmu-miR-433-3p	34.927	1.24597	4.52842	3.71066
hsa-miR-450a-5p	mmu-miR-450a-5p	16.0349	185.924	-4.02115	-3.91397
hsa-miR-483-3p	mmu-miR-483-3p	4.31288	29.6892	-3.25118	-3.71066
hsa-miR-485-3p	mmu-miR-485-3p	34.927	1.24597	4.52842	3.71066
hsa-miR-487b-3p	mmu-miR-487b-3p	34.927	1.24597	4.52842	3.71066
hsa-miR-491-5p	mmu-miR-491-5p	8.55795	7.25641	-0.277202	-0.094154
hsa-miR-493-5p	mmu-miR-493-5p	34.927	1.24597	4.52842	3.71066
hsa-miR-494-3p	mmu-miR-494-3p	34.927	1.24597	4.52842	3.71066
hsa-miR-495-3p	mmu-miR-495-3p	34.927	1.24597	4.52842	3.71066
hsa-miR-496	mmu-miR-496a-3p	34.927	1.24597	4.52842	3.71066
hsa-miR-501-3p	mmu-miR-501-3p	6.18333	25.8161	-2.64993	-3.65268
hsa-miR-502-3p	mmu-miR-500-3p	6.18333	25.8161	-2.64993	-3.65268
hsa-miR-503-5p	mmu-miR-503-5p	8.01743	92.9622	-4.07972	-3.91397
hsa-miR-505-3p	mmu-miR-505-3p	15.9281	2.81944	1.98722	1.80786
hsa-miR-532-5p	mmu-miR-532-5p	6.18333	25.8161	-2.64993	-3.65268
hsa-miR-542-3p	mmu-miR-542-3p	8.01743	92.9622	-4.07972	-3.91397
hsa-miR-543	mmu-miR-543-3p	34.927	1.24597	4.52842	3.71066
hsa-miR-544a-5p	mmu-miR-544-5p	34.927	1.24597	4.52842	3.71066
hsa-miR-652-3p	mmu-miR-652-3p	4.63446	11.7211	-1.967	-1.84222
hsa-miR-654-3p	mmu-miR-654-3p	34.927	1.24597	4.52842	3.71066
hsa-miR-665	mmu-miR-665-3p	34.927	1.24597	4.52842	3.71066
hsa-miR-668-3p	mmu-miR-668-3p	34.927	1.24597	4.52842	3.71066
hsa-miR-671-3p	mmu-miR-671-3p	56.1148	64.6234	-0.739466	-0.931645
hsa-miR-7-5p	mmu-miR-7a-5p	235.638	342.244	-1.06141	-1.59015
hsa-miR-744-5p	mmu-miR-744-5p	29.054	33.2512	-0.727223	-0.729172
hsa-miR-758-3p	mmu-miR-758-3p	34.927	1.24597	4.52842	3.71066
hsa-miR-874-3p	mmu-miR-874-3p	9.40512	0.198786	4.92838	2.42129
hsa-miR-877-5p	mmu-miR-877-5p	59.5976	66.6883	-0.68867	-0.780085
hsa-miR-93-5p	mmu-miR-93-5p	21.9384	6.35873	1.17429	0.632107
hsa-miR-98-5p	mmu-miR-98-5p	15.9235	37.697	-1.75645	-2.99388
hsa-miR-99a-5p	mmu-miR-99a-5p	5.0302	9.50132	-1.48117	-0.819525

## Sheet: TableS13f
Differential miRNA expression analysis, CAGE sequencing data, mouse vs human, Common Myeloid Progenitor
miRNA, human	miRNA, mouse	tpm, human, Common Myeloid Progenitor	tpm, mouse, Common Myeloid Progenitor	log2(foldchange)	-log10(pvalue)*sign
hsa-let-7a-5p	mmu-let-7a-5p	11.8483	7.58779	-0.976335	-0.294054
hsa-let-7d-5p	mmu-let-7d-5p	11.8483	7.58779	-0.976335	-0.294054
hsa-let-7f-5p	mmu-let-7f-5p	64.827	65.1283	-0.712058	-0.876061
hsa-let-7g-5p	mmu-let-7g-5p	124.809	86.9031	-0.116559	-0.0816319
hsa-let-7i-5p	mmu-let-7i-5p	11.8483	1.62968	1.75932	0.308801
hsa-miR-101-3p	mmu-miR-101a-3p	54.6924	0.552078	5.7136	7.86431
hsa-miR-103a-3p	mmu-miR-103-3p	44.4098	38.6847	-0.422988	-0.308801
hsa-miR-1193-3p	mmu-miR-1193-3p	25.7064	0	8.08267	1.00738
hsa-miR-1197	mmu-miR-1197-3p	25.7064	0	8.08267	1.00738
hsa-miR-1249-3p	mmu-miR-1249-3p	35.841	24.712	-0.118856	-0.0748925
hsa-miR-126-5p	mmu-miR-126a-5p	11.9963	0.845503	3.05601	0.555391
hsa-miR-127-3p	mmu-miR-127-3p	25.7064	0	8.08267	1.00738
hsa-miR-128-3p	mmu-miR-128-3p	23.9927	22.4959	-0.291346	-0.137915
hsa-miR-1306-5p	mmu-miR-1306-5p	35.693	17.0113	0.00485772	0.00267005
hsa-miR-130b-3p	mmu-miR-130b-3p	0	12.0996	-3.68354	-1.03493
hsa-miR-134-5p	mmu-miR-134-5p	25.7064	0	8.08267	1.00738
hsa-miR-136-3p	mmu-miR-136-3p	25.7064	0	8.08267	1.00738
hsa-miR-140-3p	mmu-miR-140-3p	25.7064	26.9952	-0.482407	-0.270695
hsa-miR-142-5p	mmu-miR-142a-5p	195.073	128.521	-0.111344	-0.0714374
hsa-miR-146a-5p	mmu-miR-146a-5p	5.14128	1.23186	1.72583	0.294426
hsa-miR-148b-3p	mmu-miR-148b-3p	38.9726	172.17	-3.20174	-1.96058
hsa-miR-151a-5p	mmu-miR-151-5p	11.9963	0.547573	3.7107	0.565386
hsa-miR-154-5p	mmu-miR-154-5p	25.7064	0	8.08267	1.00738
hsa-miR-155-5p	mmu-miR-155-5p	5.14128	30.467	-2.73421	-1.47574
hsa-miR-15a-5p	mmu-miR-15a-5p	44.2618	40.9827	-0.79083	-0.748449
hsa-miR-15b-5p	mmu-miR-15b-5p	17.1376	62.6474	-2.16294	-2.86576
hsa-miR-16-5p	mmu-miR-16-5p	61.3994	103.63	-1.47229	-2.57395
hsa-miR-17-5p	mmu-miR-17-5p	25.5584	2.87458	2.34335	1.24452
hsa-miR-181a-5p	mmu-miR-181a-5p	66.5407	26.2387	0.636117	0.650674
hsa-miR-181b-5p	mmu-miR-181b-5p	66.5407	26.2387	0.636117	0.650674
hsa-miR-181c-5p	mmu-miR-181c-5p	5.14128	1.46143	1.42636	0.23311
hsa-miR-181d-5p	mmu-miR-181d-5p	5.14128	1.46143	1.42636	0.23311
hsa-miR-185-5p	mmu-miR-185-5p	11.9963	2.45456	1.45397	0.236916
hsa-miR-186-5p	mmu-miR-186-5p	212.358	64.0595	0.789063	0.327777
hsa-miR-18a-5p	mmu-miR-18a-5p	25.5584	2.87458	2.34335	1.24452
hsa-miR-191-5p	mmu-miR-191-5p	3.42752	28.1686	-3.27119	-1.6213
hsa-miR-19a-3p	mmu-miR-19a-3p	25.5584	2.87458	2.34335	1.24452
hsa-miR-19b-3p	mmu-miR-19b-3p	25.5584	2.87458	2.34335	1.24452
hsa-miR-20a-5p	mmu-miR-20a-5p	25.5584	2.87458	2.34335	1.24452
hsa-miR-21-5p	mmu-miR-21a-5p	3.42752	172.088	-5.79129	-7.08981
hsa-miR-22-3p	mmu-miR-22-3p	0	18.8779	-4.33909	-1.69576
hsa-miR-221-3p	mmu-miR-221-3p	52.6827	98.6972	-1.95894	-2.57395
hsa-miR-222-3p	mmu-miR-222-3p	52.6827	98.6972	-1.95894	-2.57395
hsa-miR-223-3p	mmu-miR-223-3p	21.9829	42.8389	-2.12459	-0.734774
hsa-miR-23a-3p	mmu-miR-23a-3p	575.38	16.8716	4.13262	2.96294
hsa-miR-23b-3p	mmu-miR-23b-3p	17.1376	27.4107	-1.00476	-0.734774
hsa-miR-24-3p	mmu-miR-24-3p	592.517	44.2823	2.73725	1.49382
hsa-miR-25-3p	mmu-miR-25-3p	103.8	177.794	-1.68775	-3.14564
hsa-miR-26a-5p	mmu-miR-26a-5p	198.5	71.6353	0.721014	0.595886
hsa-miR-26b-5p	mmu-miR-26b-5p	27.1242	13.1693	-0.290218	-0.115727
hsa-miR-27a-3p	mmu-miR-27a-3p	575.38	16.8716	4.13262	2.96294
hsa-miR-27b-3p	mmu-miR-27b-3p	17.1376	27.4107	-1.00476	-0.734774
hsa-miR-28-3p	mmu-miR-28a-3p	10.2826	1.12478	2.53631	0.432218
hsa-miR-299-3p	mmu-miR-299a-3p	25.7064	0	8.08267	1.00738
hsa-miR-29a-3p	mmu-miR-29a-3p	0	55.1412	-5.84301	-3.14564
hsa-miR-29b-3p	mmu-miR-29b-3p	15.4238	56.1048	-2.1603	-1.88688
hsa-miR-29c-3p	mmu-miR-29c-3p	15.4238	0.963567	3.23306	0.650674
hsa-miR-301b-3p	mmu-miR-301b-3p	0	12.0996	-3.68354	-1.03493
hsa-miR-3064-5p	mmu-miR-3064-5p	1118.75	1644.37	-1.31792	-14.0051
hsa-miR-30c-5p	mmu-miR-30c-5p	11.9963	4.16564	0.830424	0.154376
hsa-miR-30e-5p	mmu-miR-30e-5p	11.9963	4.06116	0.861582	0.156149
hsa-miR-32-5p	mmu-miR-32-5p	30.8477	9.37813	1.22899	0.734774
hsa-miR-323a-3p	mmu-miR-323-3p	25.7064	0	8.08267	1.00738
hsa-miR-324-3p	mmu-miR-324-3p	23.9927	10.5692	0.713354	0.324748
hsa-miR-326	mmu-miR-326-3p	15.4238	6.51059	0.666466	0.182531
hsa-miR-329-3p	mmu-miR-329-3p	51.4128	0	9.03948	1.00738
hsa-miR-330-5p	mmu-miR-330-5p	28.838	6.46428	1.00608	0.41913
hsa-miR-335-3p	mmu-miR-335-3p	40.6863	0	9.23892	2.57395
hsa-miR-339-3p	mmu-miR-339-3p	18.8514	3.90185	1.56505	0.397855
hsa-miR-33a-5p	mmu-miR-33-5p	83.6783	50.1872	0.113551	0.0983832
hsa-miR-340-5p	mmu-miR-340-5p	233.749	76.9174	0.805245	0.924246
hsa-miR-342-3p	mmu-miR-342-3p	13.7101	13.1027	-0.287964	-0.118747
hsa-miR-361-5p	mmu-miR-361-5p	6.85504	14.4766	-1.35339	-0.582238
hsa-miR-369-3p	mmu-miR-369-3p	25.7064	0	8.08267	1.00738
hsa-miR-370-3p	mmu-miR-370-3p	25.7064	0	8.08267	1.00738
hsa-miR-374b-5p	mmu-miR-374b-5p	17.1376	2.5358	1.91985	0.379451
hsa-miR-376a-5p	mmu-miR-376a-5p	25.7064	0	8.08267	1.00738
hsa-miR-376c-3p	mmu-miR-376c-3p	25.7064	0	8.08267	1.00738
hsa-miR-377-5p	mmu-miR-377-5p	25.7064	0	8.08267	1.00738
hsa-miR-378a-3p	mmu-miR-378a-3p	17.1376	3.00411	1.7723	0.387764
hsa-miR-379-3p	mmu-miR-379-3p	25.7064	0	8.08267	1.00738
hsa-miR-381-3p	mmu-miR-381-3p	25.7064	0	8.08267	1.00738
hsa-miR-382-5p	mmu-miR-382-5p	25.7064	0	8.08267	1.00738
hsa-miR-409-3p	mmu-miR-409-3p	25.7064	0	8.08267	1.00738
hsa-miR-410-3p	mmu-miR-410-3p	25.7064	0	8.08267	1.00738
hsa-miR-411-5p	mmu-miR-411-5p	25.7064	0	8.08267	1.00738
hsa-miR-412-5p	mmu-miR-412-5p	25.7064	0	8.08267	1.00738
hsa-miR-421	mmu-miR-421-3p	17.1376	2.5358	1.91985	0.379451
hsa-miR-423-3p	mmu-miR-423-3p	10.2826	22.9385	-1.48134	-0.994887
hsa-miR-425-5p	mmu-miR-425-5p	3.42752	28.1686	-3.27119	-1.6213
hsa-miR-431-5p	mmu-miR-431-5p	25.7064	0	8.08267	1.00738
hsa-miR-432-5p	mmu-miR-432	25.7064	0	8.08267	1.00738
hsa-miR-433-3p	mmu-miR-433-3p	25.7064	0	8.08267	1.00738
hsa-miR-485-3p	mmu-miR-485-3p	25.7064	0	8.08267	1.00738
hsa-miR-486-5p	mmu-miR-486a-5p,mmu-miR-486b-5p	32.4135	0.199937	6.2948	4.68753
hsa-miR-487b-3p	mmu-miR-487b-3p	25.7064	0	8.08267	1.00738
hsa-miR-491-5p	mmu-miR-491-5p	8.5688	8.9853	-0.48109	-0.137915
hsa-miR-493-5p	mmu-miR-493-5p	25.7064	0	8.08267	1.00738
hsa-miR-494-3p	mmu-miR-494-3p	25.7064	0	8.08267	1.00738
hsa-miR-495-3p	mmu-miR-495-3p	25.7064	0	8.08267	1.00738
hsa-miR-496	mmu-miR-496a-3p	25.7064	0	8.08267	1.00738
hsa-miR-504-5p	mmu-miR-504-5p	5.14128	0	6.39909	0.650674
hsa-miR-505-3p	mmu-miR-505-3p	3.42752	9.183	-1.48302	-0.32811
hsa-miR-543	mmu-miR-543-3p	25.7064	0	8.08267	1.00738
hsa-miR-544a-5p	mmu-miR-544-5p	25.7064	0	8.08267	1.00738
hsa-miR-551b-3p	mmu-miR-551b-3p	85.5401	0	9.90763	2.89042
hsa-miR-598-3p	mmu-miR-598-3p	6.85504	0.0522367	5.63571	1.00738
hsa-miR-652-3p	mmu-miR-652-3p	25.5584	10.5759	0.463571	0.238566
hsa-miR-654-3p	mmu-miR-654-3p	25.7064	0	8.08267	1.00738
hsa-miR-665	mmu-miR-665-3p	25.7064	0	8.08267	1.00738
hsa-miR-668-3p	mmu-miR-668-3p	25.7064	0	8.08267	1.00738
hsa-miR-671-3p	mmu-miR-671-3p	92.0992	11.2123	2.32509	5.56945
hsa-miR-7-5p	mmu-miR-7a-5p	215.724	340.402	-1.48334	-1.95921
hsa-miR-744-5p	mmu-miR-744-5p	35.841	26.749	-0.232417	-0.156149
hsa-miR-758-3p	mmu-miR-758-3p	25.7064	0	8.08267	1.00738
hsa-miR-874-3p	mmu-miR-874-3p	5.14128	0.372767	3.69792	0.894024
hsa-miR-877-5p	mmu-miR-877-5p	94.2568	92.3965	-0.783645	-0.324748
hsa-miR-92a-3p	mmu-miR-92a-3p	25.5584	2.87458	2.34335	1.24452
hsa-miR-92b-3p	mmu-miR-92b-3p	10.1346	0.0477316	6.30611	0.705877
hsa-miR-93-5p	mmu-miR-93-5p	103.8	177.794	-1.68775	-3.14564
hsa-miR-98-5p	mmu-miR-98-5p	52.9786	57.5405	-0.68283	-0.726884

## Sheet: TableS13g
Differential miRNA expression analysis, CAGE sequencing data, mouse vs human, Granulocyte Macrophage Progenitor
miRNA, human	miRNA, mouse	tpm, human, Granulocyte Macrophage Progenitor	tpm, mouse, Granulocyte Macrophage Progenitor	log2(foldchange)	-log10(pvalue)*sign
hsa-let-7a-5p	mmu-let-7a-5p	7.44033	4.56659	-0.294133	-0.0345504
hsa-let-7d-5p	mmu-let-7d-5p	7.44033	4.56659	-0.294133	-0.0345504
hsa-let-7f-5p	mmu-let-7f-5p	57.555	55.0643	-1.24648	-0.84316
hsa-let-7g-5p	mmu-let-7g-5p	109.784	61.2892	-0.352535	-0.261453
hsa-miR-101-3p	mmu-miR-101a-3p	40.9509	0.861894	4.60358	2.2208
hsa-miR-103a-3p	mmu-miR-103-3p	55.8568	40.4678	-0.594025	-0.342378
hsa-miR-1249-3p	mmu-miR-1249-3p	124.709	17.6356	1.69392	1.34657
hsa-miR-128-3p	mmu-miR-128-3p	15.4252	24.8352	-1.91533	-0.84316
hsa-miR-1306-5p	mmu-miR-1306-5p	23.5644	14.659	-0.43584	-0.175548
hsa-miR-130b-3p	mmu-miR-130b-3p	3.70205	14.7639	-2.79984	-1.3254
hsa-miR-132-3p	mmu-miR-132-3p	9.29135	1.18267	1.88263	0.477581
hsa-miR-140-3p	mmu-miR-140-3p	16.6592	32.5898	-2.2295	-1.10162
hsa-miR-142-5p	mmu-miR-142a-5p	161.921	95.5115	-0.419686	-0.355973
hsa-miR-148b-3p	mmu-miR-148b-3p	81.4915	270.266	-2.22993	-1.1082
hsa-miR-149-5p	mmu-miR-149-5p	0.617009	22.1304	-4.9138	-3.35113
hsa-miR-151a-5p	mmu-miR-151-5p	4.31906	0.241458	2.71387	0.364425
hsa-miR-155-5p	mmu-miR-155-5p	17.44	11.2906	-0.515666	-0.175548
hsa-miR-15a-5p	mmu-miR-15a-5p	41.7664	39.4366	-0.826405	-0.463527
hsa-miR-15b-5p	mmu-miR-15b-5p	28.6548	70.0399	-2.36651	-2.90186
hsa-miR-16-5p	mmu-miR-16-5p	70.4212	109.477	-1.55712	-1.60106
hsa-miR-17-5p	mmu-miR-17-5p	16.1966	2.13772	1.87924	0.84316
hsa-miR-181a-5p	mmu-miR-181a-5p	84.6061	21.9769	0.865837	0.471037
hsa-miR-181b-5p	mmu-miR-181b-5p	84.6061	21.9769	0.865837	0.471037
hsa-miR-185-5p	mmu-miR-185-5p	3.70205	2.22554	-0.234947	-0.0185143
hsa-miR-186-5p	mmu-miR-186-5p	87.7884	77.0977	-1.27971	-0.788257
hsa-miR-188-5p	mmu-miR-188-5p	4.31906	2.00065	0.0746574	0.0107824
hsa-miR-18a-5p	mmu-miR-18a-5p	16.1966	2.13772	1.87924	0.84316
hsa-miR-191-5p	mmu-miR-191-5p	17.4668	23.8369	-1.46911	-0.826186
hsa-miR-19a-3p	mmu-miR-19a-3p	16.1966	2.13772	1.87924	0.84316
hsa-miR-19b-3p	mmu-miR-19b-3p	16.1966	2.13772	1.87924	0.84316
hsa-miR-204-5p	mmu-miR-204-5p	0	8.55612	-4.09998	-1.14151
hsa-miR-20a-5p	mmu-miR-20a-5p	16.1966	2.13772	1.87924	0.84316
hsa-miR-21-5p	mmu-miR-21a-5p	5.55308	150.079	-5.54513	-8.56178
hsa-miR-212-5p	mmu-miR-212-5p	9.29135	1.18267	1.88263	0.477581
hsa-miR-22-3p	mmu-miR-22-3p	5.63497	18.43	-3.14025	-1.19104
hsa-miR-221-3p	mmu-miR-221-3p	36.7767	113.305	-2.74413	-3.34054
hsa-miR-222-3p	mmu-miR-222-3p	36.7767	113.305	-2.74413	-3.34054
hsa-miR-223-3p	mmu-miR-223-3p	50.7856	73.9921	-1.04825	-0.376391
hsa-miR-23a-3p	mmu-miR-23a-3p	310.302	7.77805	3.77054	3.85595
hsa-miR-23b-3p	mmu-miR-23b-3p	1.85103	23.9716	-4.21682	-2.88654
hsa-miR-24-3p	mmu-miR-24-3p	312.153	31.7497	1.71785	1.16048
hsa-miR-25-3p	mmu-miR-25-3p	180.677	178.383	-0.895293	-0.84316
hsa-miR-26a-5p	mmu-miR-26a-5p	97.3522	63.3759	-0.56003	-0.463527
hsa-miR-26b-5p	mmu-miR-26b-5p	34.8344	9.33618	0.806615	0.440537
hsa-miR-27a-3p	mmu-miR-27a-3p	310.302	7.77805	3.77054	3.85595
hsa-miR-27b-3p	mmu-miR-27b-3p	1.85103	23.9716	-4.21682	-2.88654
hsa-miR-28-3p	mmu-miR-28a-3p	10.4891	0.836821	2.07273	0.376391
hsa-miR-29a-3p	mmu-miR-29a-3p	0	35.4292	-6.2429	-5.04515
hsa-miR-29b-3p	mmu-miR-29b-3p	7.4041	36.008	-3.24137	-2.12462
hsa-miR-29c-3p	mmu-miR-29c-3p	7.4041	0.578797	2.11787	0.342378
hsa-miR-301a-3p	mmu-miR-301a-3p	7.48599	2.65955	0.50349	0.0588112
hsa-miR-301b-3p	mmu-miR-301b-3p	3.70205	14.7639	-2.79984	-1.3254
hsa-miR-3064-5p	mmu-miR-3064-5p	941.463	1780.36	-2.00237	-4.17334
hsa-miR-30c-5p	mmu-miR-30c-5p	43.6	4.18455	2.31906	1.88409
hsa-miR-30e-5p	mmu-miR-30e-5p	43.6	4.07211	2.3622	1.94634
hsa-miR-32-5p	mmu-miR-32-5p	22.2942	6.03236	0.713299	0.261741
hsa-miR-324-3p	mmu-miR-324-3p	11.1424	11.2671	-1.05554	-0.413685
hsa-miR-326	mmu-miR-326-3p	9.94458	3.81987	0.403133	0.0781321
hsa-miR-330-5p	mmu-miR-330-5p	3.70205	7.11791	-1.83838	-0.534903
hsa-miR-339-3p	mmu-miR-339-3p	39.144	4.61822	2.02146	1.19104
hsa-miR-33a-5p	mmu-miR-33-5p	86.745	39.5962	-0.10641	-0.0240752
hsa-miR-340-5p	mmu-miR-340-5p	154.997	58.5828	0.452654	0.342378
hsa-miR-342-3p	mmu-miR-342-3p	23.6463	11.0125	-0.0223101	-0.0107824
hsa-miR-361-5p	mmu-miR-361-5p	6.83276	10.9258	-2.10701	-0.84316
hsa-miR-362-5p	mmu-miR-362-5p	4.31906	2.00065	0.0746574	0.0107824
hsa-miR-374b-5p	mmu-miR-374b-5p	8.02111	2.82091	0.241935	0.0210912
hsa-miR-378a-3p	mmu-miR-378a-3p	30.3515	5.33988	1.30452	0.685523
hsa-miR-421	mmu-miR-421-3p	8.02111	2.82091	0.241935	0.0210912
hsa-miR-423-3p	mmu-miR-423-3p	7.44033	23.2218	-2.615	-1.82971
hsa-miR-425-5p	mmu-miR-425-5p	17.4668	23.8369	-1.46911	-0.826186
hsa-miR-491-5p	mmu-miR-491-5p	11.8051	11.6545	-1.17166	-0.513688
hsa-miR-501-3p	mmu-miR-501-3p	4.31906	2.00065	0.0746574	0.0107824
hsa-miR-502-3p	mmu-miR-500-3p	4.31906	2.00065	0.0746574	0.0107824
hsa-miR-505-3p	mmu-miR-505-3p	8.68379	6.67969	-0.886712	-0.275511
hsa-miR-532-5p	mmu-miR-532-5p	4.31906	2.00065	0.0746574	0.0107824
hsa-miR-551b-3p	mmu-miR-551b-3p	12.9572	0	5.46139	0.84316
hsa-miR-652-3p	mmu-miR-652-3p	4.31906	8.45772	-1.8859	-0.589373
hsa-miR-671-3p	mmu-miR-671-3p	43.4	13.2027	0.52502	0.275511
hsa-miR-7-5p	mmu-miR-7a-5p	208.264	373.884	-1.67056	-1.87478
hsa-miR-744-5p	mmu-miR-744-5p	19.1635	20.0024	-1.20626	-0.513688
hsa-miR-877-5p	mmu-miR-877-5p	76.2732	116.053	-1.77049	-2.18201
hsa-miR-92a-3p	mmu-miR-92a-3p	16.1966	2.13772	1.87924	0.84316
hsa-miR-93-5p	mmu-miR-93-5p	180.677	178.383	-0.895293	-0.84316
hsa-miR-98-5p	mmu-miR-98-5p	50.1147	50.4977	-1.36991	-0.84316

## Sheet: TableS13h
Differential miRNA expression analysis, CAGE sequencing data, mouse vs human, Hepatic Sinusoidal Endothelial Cells
miRNA, human	miRNA, mouse	tpm, human, Hepatic Sinusoidal Endothelial Cells	tpm, mouse, Hepatic Sinusoidal Endothelial Cells	log2(foldchange)	-log10(pvalue)*sign
hsa-let-7a-5p	mmu-let-7a-5p	16.9012	27.9608	-1.76105	-0.660977
hsa-let-7b-5p	mmu-let-7b-5p	0	10.1676	-6.14993	-2.26839
hsa-let-7c-5p	mmu-let-7c-5p	9.24993	55.9216	-3.59663	-1.64208
hsa-let-7d-5p	mmu-let-7d-5p	14.5195	14.4888	-1.0329	-0.316679
hsa-let-7f-5p	mmu-let-7f-5p	38.5987	99.8964	-2.45101	-1.08335
hsa-let-7g-5p	mmu-let-7g-5p	66.4008	72.6981	-1.14666	-0.414623
hsa-let-7i-5p	mmu-let-7i-5p	9.24057	1.01676	2.14152	0.579772
hsa-miR-100-5p	mmu-miR-100-5p	2.38167	13.472	-3.64982	-1.29732
hsa-miR-101-3p	mmu-miR-101a-3p	13.7268	0.762568	3.15642	1.15095
hsa-miR-103a-3p	mmu-miR-103-3p	22.2974	37.8742	-1.76064	-0.667926
hsa-miR-10a-5p	mmu-miR-10a-5p	1.27545	15.7597	-4.55069	-1.93461
hsa-miR-1193-3p	mmu-miR-1193-3p	51.505	1.52514	4.02486	2.26839
hsa-miR-1197	mmu-miR-1197-3p	51.505	1.52514	4.02486	2.26839
hsa-miR-1249-3p	mmu-miR-1249-3p	14.7519	12.2011	-0.729859	-0.193188
hsa-miR-125b-5p	mmu-miR-125b-5p	18.7138	48.296	-2.36819	-0.885164
hsa-miR-126-5p	mmu-miR-126a-5p	312.082	773.498	-2.29303	-0.989244
hsa-miR-127-3p	mmu-miR-127-3p	51.505	1.52514	4.02486	2.26839
hsa-miR-128-3p	mmu-miR-128-3p	9.56028	35.5865	-2.90584	-1.28129
hsa-miR-1306-5p	mmu-miR-1306-5p	6.60817	10.9301	-1.72432	-0.494958
hsa-miR-134-5p	mmu-miR-134-5p	51.505	1.52514	4.02486	2.26839
hsa-miR-136-3p	mmu-miR-136-3p	51.505	1.52514	4.02486	2.26839
hsa-miR-139-5p	mmu-miR-139-5p	66.9524	187.592	-2.62458	-0.884851
hsa-miR-140-3p	mmu-miR-140-3p	16.1067	31.0111	-1.99904	-0.719986
hsa-miR-148b-3p	mmu-miR-148b-3p	248.431	115.656	0.0747122	0.0236087
hsa-miR-149-5p	mmu-miR-149-5p	80.5442	4.32122	3.19678	1.51552
hsa-miR-151a-5p	mmu-miR-151-5p	21.075	59.2261	-2.5105	-1.21832
hsa-miR-152-3p	mmu-miR-152-3p	20.9779	25.6731	-1.35192	-0.423042
hsa-miR-154-5p	mmu-miR-154-5p	51.505	1.52514	4.02486	2.26839
hsa-miR-15a-5p	mmu-miR-15a-5p	2.69342	48.296	-5.084	-2.26839
hsa-miR-15b-5p	mmu-miR-15b-5p	14.325	8.64244	-0.254334	-0.0424982
hsa-miR-16-5p	mmu-miR-16-5p	17.0184	56.9384	-2.73692	-1.31353
hsa-miR-17-5p	mmu-miR-17-5p	6.60817	3.05027	0.105429	0.0236087
hsa-miR-181a-5p	mmu-miR-181a-5p	6.97473	8.38825	-1.28669	-0.371435
hsa-miR-181b-5p	mmu-miR-181b-5p	6.97473	8.38825	-1.28669	-0.371435
hsa-miR-185-5p	mmu-miR-185-5p	10.6932	1.27095	2.05095	0.621942
hsa-miR-186-5p	mmu-miR-186-5p	22.3598	51.3462	-2.15747	-0.752204
hsa-miR-18a-5p	mmu-miR-18a-5p	6.60817	3.05027	0.105429	0.0236087
hsa-miR-191-5p	mmu-miR-191-5p	5.8418	15.2514	-2.38794	-0.887169
hsa-miR-19a-3p	mmu-miR-19a-3p	6.60817	3.05027	0.105429	0.0236087
hsa-miR-19b-3p	mmu-miR-19b-3p	6.60817	3.05027	0.105429	0.0236087
hsa-miR-204-5p	mmu-miR-204-5p	0	13.9804	-6.60936	-2.26839
hsa-miR-20a-5p	mmu-miR-20a-5p	6.60817	3.05027	0.105429	0.0236087
hsa-miR-21-5p	mmu-miR-21a-5p	59.3551	66.3434	-0.973184	-0.220125
hsa-miR-217	mmu-miR-217-5p	6.44035	0	6.10433	1.35293
hsa-miR-218-5p	mmu-miR-218-5p	8.84872	6.35473	-0.526113	-0.0899754
hsa-miR-22-3p	mmu-miR-22-3p	11.4523	21.8603	-1.97533	-0.667926
hsa-miR-221-3p	mmu-miR-221-3p	16.1955	27.9608	-1.82983	-0.655375
hsa-miR-222-3p	mmu-miR-222-3p	16.1955	27.9608	-1.82983	-0.655375
hsa-miR-23a-3p	mmu-miR-23a-3p	15.1437	21.6061	-1.55018	-0.535514
hsa-miR-23b-3p	mmu-miR-23b-3p	6.32348	97.6087	-4.95205	-2.49289
hsa-miR-24-3p	mmu-miR-24-3p	21.4672	119.215	-3.52027	-2.09682
hsa-miR-25-3p	mmu-miR-25-3p	62.8062	7.62568	1.95898	0.752204
hsa-miR-26a-5p	mmu-miR-26a-5p	109.227	112.86	-1.13976	-0.379659
hsa-miR-26b-5p	mmu-miR-26b-5p	23.7067	24.4022	-1.077	-0.360787
hsa-miR-27a-3p	mmu-miR-27a-3p	15.1437	21.6061	-1.55018	-0.535514
hsa-miR-27b-3p	mmu-miR-27b-3p	6.32348	97.6087	-4.95205	-2.49289
hsa-miR-28-3p	mmu-miR-28a-3p	8.22277	43.2122	-3.40841	-1.56049
hsa-miR-299-3p	mmu-miR-299a-3p	51.505	1.52514	4.02486	2.26839
hsa-miR-29b-3p	mmu-miR-29b-3p	0.793772	13.9804	-4.92448	-2.02472
hsa-miR-301a-3p	mmu-miR-301a-3p	21.9572	3.05027	1.82399	0.621942
hsa-miR-3064-5p	mmu-miR-3064-5p	370.921	1835.5	-3.14941	-1.40629
hsa-miR-30a-5p	mmu-miR-30a-5p	4.70923	20.5893	-3.17095	-1.39307
hsa-miR-30c-5p	mmu-miR-30c-5p	23.1987	22.3687	-0.964188	-0.316679
hsa-miR-30e-5p	mmu-miR-30e-5p	18.4895	1.77933	2.35407	0.878536
hsa-miR-32-5p	mmu-miR-32-5p	21.2366	28.9776	-1.48739	-0.531573
hsa-miR-323a-3p	mmu-miR-323-3p	51.505	1.52514	4.02486	2.26839
hsa-miR-324-3p	mmu-miR-324-3p	5.86851	12.2011	-2.05689	-0.65195
hsa-miR-326	mmu-miR-326-3p	76.5624	52.1088	-0.51928	-0.121017
hsa-miR-329-3p	mmu-miR-329-3p	103.01	1.52514	5.01803	2.49289
hsa-miR-330-5p	mmu-miR-330-5p	7.23272	12.9637	-1.84183	-0.608801
hsa-miR-331-3p	mmu-miR-331-3p	0	16.0139	-6.80528	-2.26839
hsa-miR-335-3p	mmu-miR-335-3p	44.3684	292.826	-3.6899	-0.443246
hsa-miR-339-3p	mmu-miR-339-3p	49.7767	10.676	1.20609	0.423042
hsa-miR-33a-5p	mmu-miR-33-5p	189.383	33.0446	1.43372	0.531573
hsa-miR-340-5p	mmu-miR-340-5p	23.0003	46.5166	-2.08183	-0.791298
hsa-miR-361-5p	mmu-miR-361-5p	5.30672	27.4524	-3.40316	-1.34971
hsa-miR-369-3p	mmu-miR-369-3p	51.505	1.52514	4.02486	2.26839
hsa-miR-370-3p	mmu-miR-370-3p	51.505	1.52514	4.02486	2.26839
hsa-miR-376a-5p	mmu-miR-376a-5p	51.505	1.52514	4.02486	2.26839
hsa-miR-376c-3p	mmu-miR-376c-3p	51.505	1.52514	4.02486	2.26839
hsa-miR-377-5p	mmu-miR-377-5p	51.505	1.52514	4.02486	2.26839
hsa-miR-379-3p	mmu-miR-379-3p	51.505	1.52514	4.02486	2.26839
hsa-miR-381-3p	mmu-miR-381-3p	51.505	1.52514	4.02486	2.26839
hsa-miR-382-5p	mmu-miR-382-5p	51.505	1.52514	4.02486	2.26839
hsa-miR-409-3p	mmu-miR-409-3p	51.505	1.52514	4.02486	2.26839
hsa-miR-410-3p	mmu-miR-410-3p	51.505	1.52514	4.02486	2.26839
hsa-miR-411-5p	mmu-miR-411-5p	51.505	1.52514	4.02486	2.26839
hsa-miR-412-5p	mmu-miR-412-5p	51.505	1.52514	4.02486	2.26839
hsa-miR-423-3p	mmu-miR-423-3p	25.2402	21.6061	-0.814981	-0.245288
hsa-miR-424-5p	mmu-miR-322-5p	11.6024	71.173	-3.63585	-1.93926
hsa-miR-425-5p	mmu-miR-425-5p	5.8418	15.2514	-2.38794	-0.887169
hsa-miR-431-5p	mmu-miR-431-5p	51.505	1.52514	4.02486	2.26839
hsa-miR-432-5p	mmu-miR-432	51.505	1.52514	4.02486	2.26839
hsa-miR-433-3p	mmu-miR-433-3p	51.505	1.52514	4.02486	2.26839
hsa-miR-450a-5p	mmu-miR-450a-5p	23.2049	142.346	-3.66448	-2.03839
hsa-miR-455-5p	mmu-miR-455-5p	12.166	5.33798	0.167705	0.0236087
hsa-miR-483-3p	mmu-miR-483-3p	7.59857	10.1676	-1.43955	-0.400298
hsa-miR-485-3p	mmu-miR-485-3p	51.505	1.52514	4.02486	2.26839
hsa-miR-487b-3p	mmu-miR-487b-3p	51.505	1.52514	4.02486	2.26839
hsa-miR-493-5p	mmu-miR-493-5p	51.505	1.52514	4.02486	2.26839
hsa-miR-494-3p	mmu-miR-494-3p	51.505	1.52514	4.02486	2.26839
hsa-miR-495-3p	mmu-miR-495-3p	51.505	1.52514	4.02486	2.26839
hsa-miR-496	mmu-miR-496a-3p	51.505	1.52514	4.02486	2.26839
hsa-miR-503-5p	mmu-miR-503-5p	11.6024	71.173	-3.63585	-1.93926
hsa-miR-505-3p	mmu-miR-505-3p	4.08468	10.9301	-2.41102	-0.823088
hsa-miR-542-3p	mmu-miR-542-3p	11.6024	71.173	-3.63585	-1.93926
hsa-miR-543	mmu-miR-543-3p	51.505	1.52514	4.02486	2.26839
hsa-miR-544a-5p	mmu-miR-544-5p	51.505	1.52514	4.02486	2.26839
hsa-miR-652-3p	mmu-miR-652-3p	3.17544	10.9301	-2.8627	-0.958495
hsa-miR-654-3p	mmu-miR-654-3p	51.505	1.52514	4.02486	2.26839
hsa-miR-665	mmu-miR-665-3p	51.505	1.52514	4.02486	2.26839
hsa-miR-668-3p	mmu-miR-668-3p	51.505	1.52514	4.02486	2.26839
hsa-miR-671-3p	mmu-miR-671-3p	84.3667	34.0614	0.291752	0.0659515
hsa-miR-7-5p	mmu-miR-7a-5p	239.612	156.835	-0.32834	-0.0678094
hsa-miR-744-5p	mmu-miR-744-5p	15.3501	17.0307	-1.12039	-0.324324
hsa-miR-758-3p	mmu-miR-758-3p	51.505	1.52514	4.02486	2.26839
hsa-miR-874-3p	mmu-miR-874-3p	9.27524	5.84635	-0.348681	-0.0659515
hsa-miR-877-5p	mmu-miR-877-5p	82.1355	52.8714	-0.376383	-0.0899754
hsa-miR-92a-3p	mmu-miR-92a-3p	6.60817	3.05027	0.105429	0.0236087
hsa-miR-93-5p	mmu-miR-93-5p	62.8062	7.62568	1.95898	0.752204
hsa-miR-98-5p	mmu-miR-98-5p	24.0791	85.4076	-2.89608	-1.34971
hsa-miR-99a-5p	mmu-miR-99a-5p	9.24993	45.7541	-3.30584	-1.40629

## Sheet: TableS13i
Differential miRNA expression analysis, CAGE sequencing data, mouse vs human, Hepatic Stellate Cells (lipocyte)
miRNA, human	miRNA, mouse	tpm, human, Hepatic Stellate Cells (lipocyte)	tpm, mouse, Hepatic Stellate Cells (lipocyte)	log2(foldchange)	-log10(pvalue)*sign
hsa-let-7a-5p	mmu-let-7a-5p	15.055	8.34108	-2.00353	-1.0742
hsa-let-7d-5p	mmu-let-7d-5p	13.3232	4.17054	-1.26912	-0.487851
hsa-let-7f-5p	mmu-let-7f-5p	33.7531	38.0562	-3.03989	-1.66469
hsa-let-7g-5p	mmu-let-7g-5p	78.4498	23.9806	-0.994967	-0.386832
hsa-let-7i-5p	mmu-let-7i-5p	8.22552	0	3.34968	0.634983
hsa-miR-101-3p	mmu-miR-101a-3p	15.3792	0.521318	2.21649	0.551711
hsa-miR-103a-3p	mmu-miR-103-3p	26.4001	30.7577	-2.70973	-1.2653
hsa-miR-107	mmu-miR-107-3p	2.08439	50.5678	-7.13815	-7.08481
hsa-miR-1193-3p	mmu-miR-1193-3p	105.374	0.521318	4.62027	1.66469
hsa-miR-1197	mmu-miR-1197-3p	105.374	0.521318	4.62027	1.66469
hsa-miR-122-5p	mmu-miR-122-5p	1.32454	88.624	-9.25361	-1.20999
hsa-miR-1249-3p	mmu-miR-1249-3p	9.57473	7.81977	-2.26126	-1.12438
hsa-miR-125b-5p	mmu-miR-125b-5p	60.2514	6.25581	0.302789	0.0985042
hsa-miR-126-5p	mmu-miR-126a-5p	6.29869	152.225	-6.74852	-1.66469
hsa-miR-127-3p	mmu-miR-127-3p	105.374	0.521318	4.62027	1.66469
hsa-miR-128-3p	mmu-miR-128-3p	12.2851	8.8624	-2.22788	-1.19901
hsa-miR-1306-5p	mmu-miR-1306-5p	10.245	3.64922	-1.42528	-0.558027
hsa-miR-134-5p	mmu-miR-134-5p	105.374	0.521318	4.62027	1.66469
hsa-miR-136-3p	mmu-miR-136-3p	105.374	0.521318	4.62027	1.66469
hsa-miR-139-5p	mmu-miR-139-5p	0.825794	25.0233	-7.28776	-12.0705
hsa-miR-140-3p	mmu-miR-140-3p	13.0949	9.38372	-2.33347	-1.39194
hsa-miR-143-3p	mmu-miR-143-3p	8.82798	7.29845	-2.88555	-0.676087
hsa-miR-145-5p	mmu-miR-145a-5p	8.82798	7.29845	-2.88555	-0.676087
hsa-miR-148b-3p	mmu-miR-148b-3p	312.645	176.727	-1.97129	-1.56596
hsa-miR-149-5p	mmu-miR-149-5p	112.481	2.60659	2.56366	1.20176
hsa-miR-151a-5p	mmu-miR-151-5p	11.9253	26.5872	-3.69178	-3.05422
hsa-miR-152-3p	mmu-miR-152-3p	105.788	33.8857	-1.26269	-0.757925
hsa-miR-154-5p	mmu-miR-154-5p	105.374	0.521318	4.62027	1.66469
hsa-miR-15a-5p	mmu-miR-15a-5p	5.33227	23.4593	-5.2426	-8.31642
hsa-miR-15b-5p	mmu-miR-15b-5p	21.4194	4.17054	0.113448	0.0187489
hsa-miR-16-5p	mmu-miR-16-5p	26.7517	27.6298	-2.41637	-0.966343
hsa-miR-181a-5p	mmu-miR-181a-5p	8.407	2.08527	-0.833087	-0.224492
hsa-miR-181b-5p	mmu-miR-181b-5p	8.407	2.08527	-0.833087	-0.224492
hsa-miR-185-5p	mmu-miR-185-5p	9.06416	1.56395	-0.20038	-0.0427336
hsa-miR-186-5p	mmu-miR-186-5p	26.3205	35.4496	-2.79042	-1.19901
hsa-miR-191-5p	mmu-miR-191-5p	8.40538	1.04264	0.104537	0.0205841
hsa-miR-199a-3p	mmu-miR-199a-3p	6.85853	0.521318	0.625114	0.0725511
hsa-miR-21-5p	mmu-miR-21a-5p	38.4996	17.2035	-1.40574	-0.595274
hsa-miR-214-3p	mmu-miR-214-3p	5.82531	0.521318	0.403822	0.0555352
hsa-miR-218-5p	mmu-miR-218-5p	36.7779	0.521318	3.09805	0.908688
hsa-miR-22-3p	mmu-miR-22-3p	19.8312	24.5019	-3.29771	-2.9259
hsa-miR-224-5p	mmu-miR-224-5p	9.45103	0	3.53485	0.676087
hsa-miR-23a-3p	mmu-miR-23a-3p	8.45702	1.04264	0.418446	0.0617883
hsa-miR-23b-3p	mmu-miR-23b-3p	33.9781	16.6822	-1.93768	-1.66469
hsa-miR-24-3p	mmu-miR-24-3p	42.4351	17.7248	-1.62698	-1.02751
hsa-miR-25-3p	mmu-miR-25-3p	65.7859	3.12791	2.10322	0.394409
hsa-miR-26a-5p	mmu-miR-26a-5p	142.821	51.6105	-1.40599	-0.905861
hsa-miR-26b-5p	mmu-miR-26b-5p	29.1342	18.2461	-2.09864	-1.66469
hsa-miR-27a-3p	mmu-miR-27a-3p	8.45702	1.04264	0.418446	0.0617883
hsa-miR-27b-3p	mmu-miR-27b-3p	33.9781	16.6822	-1.93768	-1.66469
hsa-miR-28-3p	mmu-miR-28a-3p	15.93	19.2888	-3.14809	-3.63106
hsa-miR-299-3p	mmu-miR-299a-3p	105.374	0.521318	4.62027	1.66469
hsa-miR-301a-3p	mmu-miR-301a-3p	36.3547	2.08527	1.7846	0.333937
hsa-miR-3064-5p	mmu-miR-3064-5p	230.337	417.054	-3.20995	-1.19901
hsa-miR-30c-5p	mmu-miR-30c-5p	19.2863	11.9903	-2.06348	-1.41009
hsa-miR-30e-5p	mmu-miR-30e-5p	15.5264	2.08527	0.206297	0.0454278
hsa-miR-32-5p	mmu-miR-32-5p	14.6301	15.1182	-2.59003	-1.66469
hsa-miR-323a-3p	mmu-miR-323-3p	105.374	0.521318	4.62027	1.66469
hsa-miR-324-3p	mmu-miR-324-3p	16.0317	6.25581	-1.51089	-0.680218
hsa-miR-326	mmu-miR-326-3p	8.53113	6.77713	-2.57364	-1.61223
hsa-miR-329-3p	mmu-miR-329-3p	210.747	0.521318	5.6218	1.97203
hsa-miR-330-5p	mmu-miR-330-5p	11.9574	3.12791	-0.88169	-0.27872
hsa-miR-335-3p	mmu-miR-335-3p	271.655	54.7384	-0.604228	-0.2746
hsa-miR-339-3p	mmu-miR-339-3p	69.6286	1.04264	3.3551	1.66469
hsa-miR-33a-5p	mmu-miR-33-5p	193.858	14.0756	0.848831	0.394409
hsa-miR-340-5p	mmu-miR-340-5p	17.8529	56.8236	-4.31955	-3.88562
hsa-miR-369-3p	mmu-miR-369-3p	105.374	0.521318	4.62027	1.66469
hsa-miR-370-3p	mmu-miR-370-3p	105.374	0.521318	4.62027	1.66469
hsa-miR-376a-5p	mmu-miR-376a-5p	105.374	0.521318	4.62027	1.66469
hsa-miR-376c-3p	mmu-miR-376c-3p	105.374	0.521318	4.62027	1.66469
hsa-miR-377-5p	mmu-miR-377-5p	105.374	0.521318	4.62027	1.66469
hsa-miR-379-3p	mmu-miR-379-3p	105.374	0.521318	4.62027	1.66469
hsa-miR-381-3p	mmu-miR-381-3p	105.374	0.521318	4.62027	1.66469
hsa-miR-382-5p	mmu-miR-382-5p	105.374	0.521318	4.62027	1.66469
hsa-miR-409-3p	mmu-miR-409-3p	105.374	0.521318	4.62027	1.66469
hsa-miR-410-3p	mmu-miR-410-3p	105.374	0.521318	4.62027	1.66469
hsa-miR-411-5p	mmu-miR-411-5p	105.374	0.521318	4.62027	1.66469
hsa-miR-412-5p	mmu-miR-412-5p	105.374	0.521318	4.62027	1.66469
hsa-miR-423-3p	mmu-miR-423-3p	27.0586	5.73449	-0.598986	-0.201079
hsa-miR-424-5p	mmu-miR-322-5p	24.9088	3.64922	-0.232461	-0.0555352
hsa-miR-425-5p	mmu-miR-425-5p	8.40538	1.04264	0.104537	0.0205841
hsa-miR-431-5p	mmu-miR-431-5p	105.374	0.521318	4.62027	1.66469
hsa-miR-432-5p	mmu-miR-432	105.374	0.521318	4.62027	1.66469
hsa-miR-433-3p	mmu-miR-433-3p	105.374	0.521318	4.62027	1.66469
hsa-miR-450a-5p	mmu-miR-450a-5p	49.8177	7.29845	-0.233015	-0.0624291
hsa-miR-483-3p	mmu-miR-483-3p	101.14	0	6.94732	1.15818
hsa-miR-485-3p	mmu-miR-485-3p	105.374	0.521318	4.62027	1.66469
hsa-miR-487b-3p	mmu-miR-487b-3p	105.374	0.521318	4.62027	1.66469
hsa-miR-493-5p	mmu-miR-493-5p	105.374	0.521318	4.62027	1.66469
hsa-miR-494-3p	mmu-miR-494-3p	105.374	0.521318	4.62027	1.66469
hsa-miR-495-3p	mmu-miR-495-3p	105.374	0.521318	4.62027	1.66469
hsa-miR-496	mmu-miR-496a-3p	105.374	0.521318	4.62027	1.66469
hsa-miR-503-5p	mmu-miR-503-5p	24.9088	3.64922	-0.232461	-0.0555352
hsa-miR-505-3p	mmu-miR-505-3p	3.6486	52.1318	-6.16036	-4.33855
hsa-miR-542-3p	mmu-miR-542-3p	24.9088	3.64922	-0.232461	-0.0555352
hsa-miR-543	mmu-miR-543-3p	105.374	0.521318	4.62027	1.66469
hsa-miR-544a-5p	mmu-miR-544-5p	105.374	0.521318	4.62027	1.66469
hsa-miR-654-3p	mmu-miR-654-3p	105.374	0.521318	4.62027	1.66469
hsa-miR-665	mmu-miR-665-3p	105.374	0.521318	4.62027	1.66469
hsa-miR-668-3p	mmu-miR-668-3p	105.374	0.521318	4.62027	1.66469
hsa-miR-671-3p	mmu-miR-671-3p	84.1811	16.6822	-0.559692	-0.164364
hsa-miR-7-5p	mmu-miR-7a-5p	187.551	89.1453	-1.35983	-0.340089
hsa-miR-744-5p	mmu-miR-744-5p	11.072	10.9477	-2.39799	-1.18706
hsa-miR-758-3p	mmu-miR-758-3p	105.374	0.521318	4.62027	1.66469
hsa-miR-877-5p	mmu-miR-877-5p	57.3782	26.5872	-1.5308	-0.6224
hsa-miR-93-5p	mmu-miR-93-5p	65.7859	3.12791	2.10322	0.394409
hsa-miR-98-5p	mmu-miR-98-5p	20.4299	33.8857	-3.55678	-1.99356

[truncated: 15 more sheets: TableS13j, TableS13k, TableS13l, TableS13m, TableS13n, TableS13o, TableS13p, TableS13q, TableS13r, TableS13s, TableS13t, TableS13u, TableS13v, TableS13w, TableS13x]
