# Supplementary material for: Comparative transcriptomics of primary cells in vertebrates
Source: Genome Res. 2020 Jul;30(7):951–61. doi: 10.1101/gr.255679.119 (PMC7397866; doi:10.1101/gr.255679.119)
Supplement: Supplemental Material [file supp_gr.255679.119_Supplemental_Table_S14.xlsx]

## Sheet: TableS14
Genome assemblies used in the pairwise genome alignments:
Species	Assembly
Human	hg38
Chimpanzee	panTro5
Gorilla	ponAbe3
Macaque	rheMac8
Marmoset	calJac3
Bushbaby	otoGar3
Tree shrew	tupBel1
Mouse	mm10
Rat	rn6
Guinea pig	cavPor3
Rabbit	oryCun2
Dog	canFam3
Cat	felCat8
Horse	equCab2
Cow	bosTau8
Hedgehog	eriEur2
Shrew	sorAra2
Elephant	loxAfr3
Tenrec	echTel2
Armadillo	dasNov3
Opossum	monDom5
Platypus	ornAna2
Chicken	galGal5
Lizard	anoCar2
Frog	xenTro7
Tetraodon	tetNig2
Fugu	fr3
Medaka	oryLat2
Stickleback	gasAcu1
Zebrafish	danRer10
